# Supplementary material for: Protein Coding and Long Noncoding RNA (lncRNA) Transcriptional Landscape in SARS-CoV-2 Infected Bronchial Epithelial Cells Highlight a Role for Interferon and Inflammatory Response
Source: MDPI journal article supplement (doi:10.3390/genes11070760), 2020-07-07
Supplement: s1 [file s1]

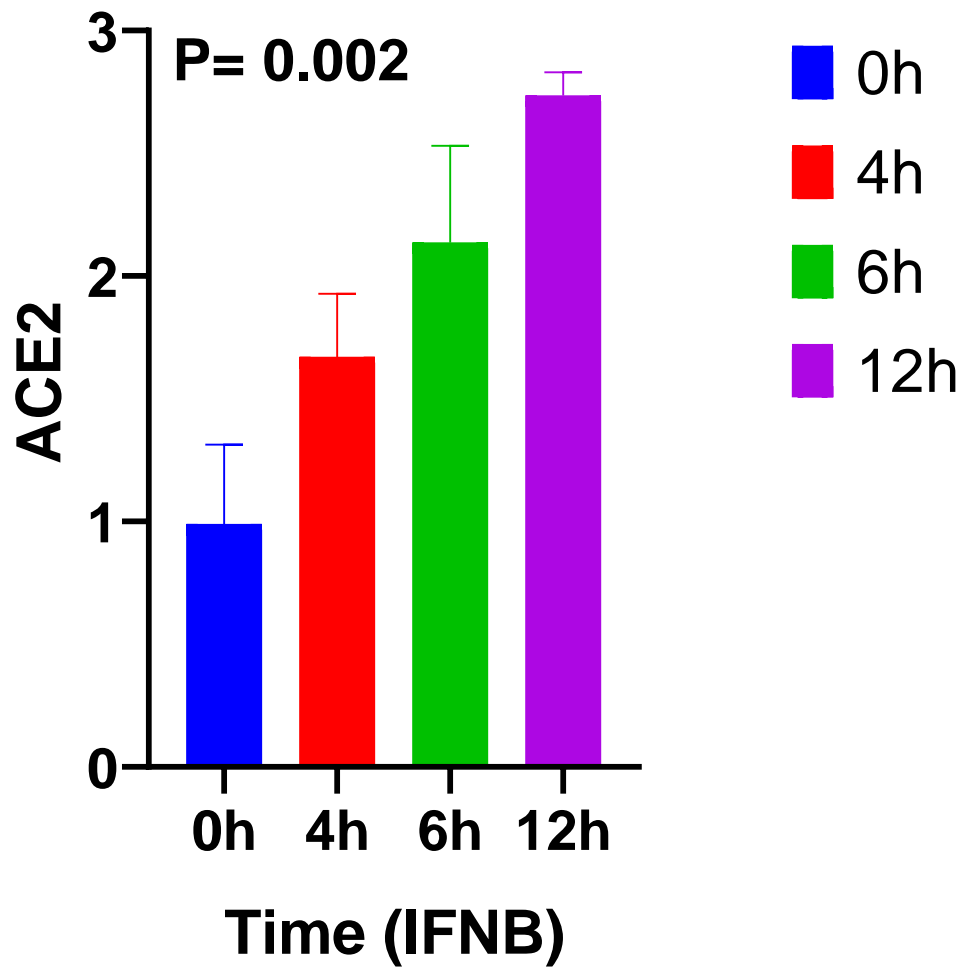

Supplementary figure 2. Expression of ACE2 in NHBE cells response to IFNB based on RNASEQ analysis.
