# Supplementary material for: Protein Coding and Long Noncoding RNA (lncRNA) Transcriptional Landscape in SARS-CoV-2 Infected Bronchial Epithelial Cells Highlight a Role for Interferon and Inflammatory Response
Source: MDPI journal article supplement (doi:10.3390/genes11070760), 2020-07-07
Supplement: s1 [file s1]

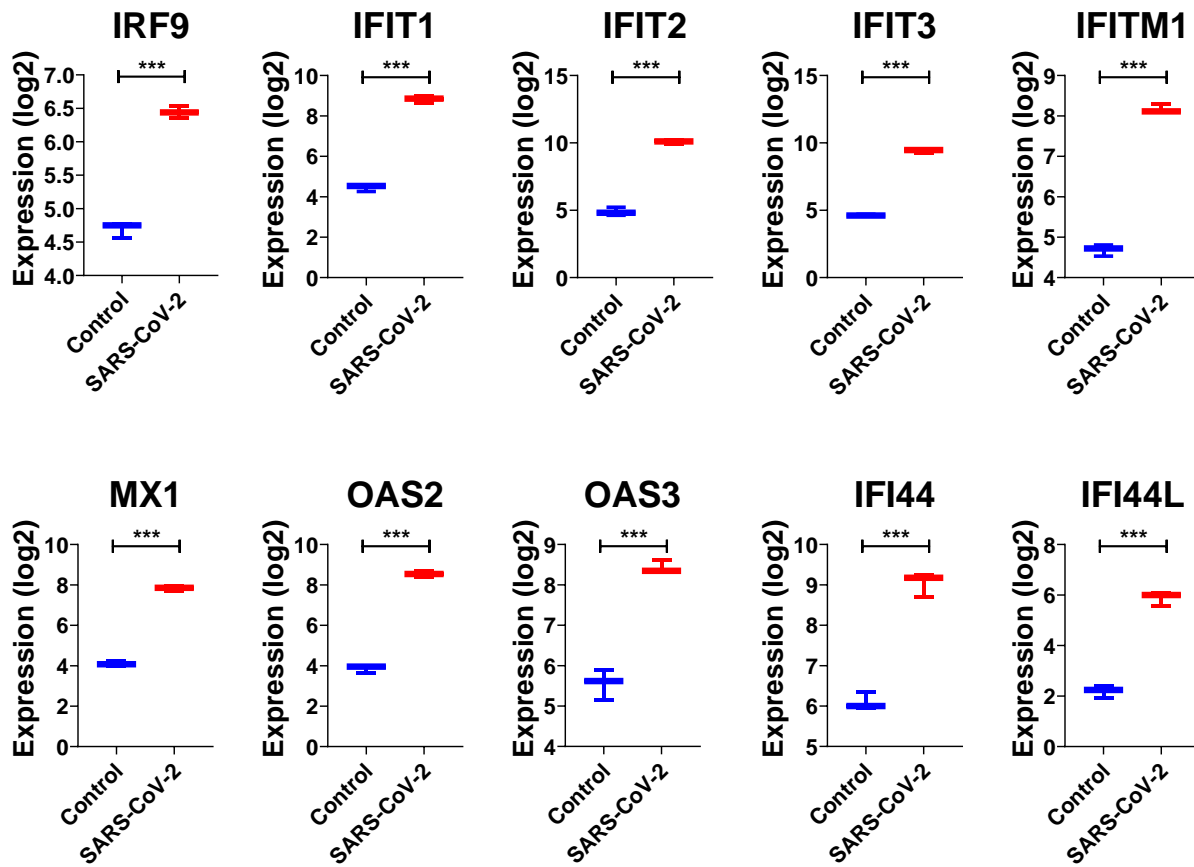

**Supplementary figure 1. Expression of selected antiviral host response genes in Calu-3 cells infected with SARS-CoV-2.** Expression data from Calu-3 cells (SRX8089279, SRX8089280, and SRX8089281) compared to control calu-3 cells (SRX8089276, SRX8089277, and SRX8089278). Data were aligned to hg38 in CLC genomics workbench 20.0. Data are presented as scattered plot with the mean and SD indicated (n=3). \*\*\*P< 0.001
