# Supplementary material for: Protein Coding and Long Noncoding RNA (lncRNA) Transcriptional Landscape in SARS-CoV-2 Infected Bronchial Epithelial Cells Highlight a Role for Interferon and Inflammatory Response
Source: Genes (Basel). 2020 Jul 7;11(7):760. doi: 10.3390/genes11070760 (PMC7397219; doi:10.3390/genes11070760)
Supplement: Supplementary file 1 [file genes-11-00760-s001.zip]

Archive with 13 entries (13 files):
- Supplementary Figure 1.pdf
- Supplementary figure 2.pdf
- Supplementary table 1.xlsx
- Supplementary table 2.xlsx
- Supplementary table 3.xlsx
- Supplementary table 4.xlsx
- Supplementary table 5.xlsx
- Supplementary table 6.xlsx
- Supplementary table 7.xlsx
- Supplementary table 8.xlsx
- Supplementary table 9.xlsx
- Supplementary table 10.xlsx
- Supplementary table 11.xlsx
