# Supplementary material for: Protein Coding and Long Noncoding RNA (lncRNA) Transcriptional Landscape in SARS-CoV-2 Infected Bronchial Epithelial Cells Highlight a Role for Interferon and Inflammatory Response
Source: Genes (Basel). 2020 Jul 7;11(7):760. doi: 10.3390/genes11070760 (PMC7397219; doi:10.3390/genes11070760)
Supplement: Supplementary file 1 [file genes-11-00760-s001.zip › Supplementary table 1.xlsx]

## Sheet: mRNA_NHBE
Gene stable ID	Gene type	Gene name	SRX8089292	SRX8089293	SRX8089294	SRX7990869	SRX7990870	SRX7990871
ENSG00000000003	protein_coding	TSPAN6	13.3083	22.3869	21.7849	8.48369	6.09572	7.61592
ENSG00000000005	protein_coding	TNMD	0	0	0	0	0	0
ENSG00000000419	protein_coding	DPM1	77.7523	159.536	150.221	104.069	103.377	89.6323
ENSG00000000457	protein_coding	SCYL3	3.83243	4.71371	4.17343	3.53386	3.73749	3.33112
ENSG00000000460	protein_coding	C1orf112	5.94802	4.65821	6.23594	1.64188	1.67086	1.6989
ENSG00000000938	protein_coding	FGR	0	0.124588	0.0679497	0.107344	0.0517449	0.109053
ENSG00000000971	protein_coding	CFH	17.4815	23.4967	26.1771	27.6145	28.3554	26.9064
ENSG00000001036	protein_coding	FUCA2	44.4006	54.7972	62.3782	35.5705	43.7193	40.1446
ENSG00000001084	protein_coding	GCLC	29.6081	29.2378	33.1189	31.215	31.008	28.7875
ENSG00000001167	protein_coding	NFYA	25.9564	32.8373	33.6478	26.6729	26.6795	26.6943
ENSG00000001460	protein_coding	STPG1	10.2517	10.5946	10.3144	7.46465	7.60785	7.40291
ENSG00000001461	protein_coding	NIPAL3	28.2363	28.0725	27.246	33.9237	35.4994	33.6721
ENSG00000001497	protein_coding	LAS1L	33.2197	35.4334	34.3331	20.1363	21.4172	21.7106
ENSG00000001561	protein_coding	ENPP4	0.218467	0.453657	0.593813	0.781735	0.829032	0.595634
ENSG00000001617	protein_coding	SEMA3F	152.521	131.052	135.045	127.281	91.5256	98.1015
ENSG00000001626	protein_coding	CFTR	0	0.0847629	0.0231146	0.0182578	0.123215	0.0803765
ENSG00000001629	protein_coding	ANKIB1	21.214	21.7835	24.5698	22.4534	20.6288	23.1685
ENSG00000001630	protein_coding	CYP51A1	119.022	138.86	159.217	81.5781	87.7733	89.2169
ENSG00000001631	protein_coding	KRIT1	9.48495	14.8738	17.0391	9.2749	9.16753	8.60017
ENSG00000002016	protein_coding	RAD52	3.71758	4.77219	5.7158	4.47448	4.31382	5.2965
ENSG00000002330	protein_coding	BAD	85.5369	110.273	103.736	21.574	11.5779	13.9998
ENSG00000002549	protein_coding	LAP3	23.9903	27.4967	29.811	31.6999	32.7347	33.2601
ENSG00000002586	protein_coding	CD99	131.989	91.5049	99.1505	102.903	92.1476	97.0757
ENSG00000002587	protein_coding	HS3ST1	6.68642	5.49718	7.38717	2.68555	2.65973	2.38933
ENSG00000002726	protein_coding	AOC1	0.530629	1.43244	2.16344	0	0	0.0321493
ENSG00000002745	protein_coding	WNT16	0.310834	0	0.140812	0	0	0
ENSG00000002746	protein_coding	HECW1	0.0364034	0.0302373	0.0164913	0.0260522	0.0251168	0
ENSG00000002822	protein_coding	MAD1L1	12.6996	12.2386	13.4133	6.75361	4.55051	5.18622
ENSG00000002834	protein_coding	LASP1	138.082	111.709	117.653	121.492	119.584	126.491
ENSG00000002919	protein_coding	SNX11	19.1321	17.8778	19.3098	8.6078	8.92962	7.97773
ENSG00000002933	protein_coding	TMEM176A	0	0	0	0	0	0
ENSG00000003056	protein_coding	M6PR	91.5512	106.603	110.384	107.443	115.789	109.376
ENSG00000003096	protein_coding	KLHL13	1.67084	2.17225	2.36947	1.35171	1.85452	2.10385
ENSG00000003137	protein_coding	CYP26B1	3.54035	2.1845	2.56613	4.30723	2.82654	3.70165
ENSG00000003147	protein_coding	ICA1	4.36326	5.4363	4.70624	6.61691	6.02093	6.64671
ENSG00000003249	protein_coding	DBNDD1	27.5005	19.7722	19.1561	18.7815	12.5984	13.7594
ENSG00000003393	protein_coding	ALS2	10.2545	9.76894	10.8981	11.8079	12.7085	13.3033
ENSG00000003400	protein_coding	CASP10	1.8067	1.50068	2.51601	2.65778	2.74702	3.3001
ENSG00000003402	protein_coding	CFLAR	14.7587	15.989	16.8988	25.178	26.3214	26.5441
ENSG00000003436	protein_coding	TFPI	1.86214	2.9136	2.98194	1.79752	2.28574	1.94683
ENSG00000003509	protein_coding	NDUFAF7	11.2544	12.8103	15.0434	12.4294	13.9963	13.2165
ENSG00000003756	protein_coding	RBM5	16.3102	18.6329	18.5717	22.083	27.5419	23.9836
ENSG00000003987	protein_coding	MTMR7	0.585775	0.91229	0.431218	0.0786023	0.17682	0.0354904
ENSG00000003989	protein_coding	SLC7A2	0.513378	0.266513	0.465135	0.390363	0.22138	0.295489
ENSG00000004059	protein_coding	ARF5	300.199	354.632	309.64	128.008	105.576	116.472
ENSG00000004139	protein_coding	SARM1	0.182722	0.113829	0.144857	0.179803	0.488522	0.160524
ENSG00000004142	protein_coding	POLDIP2	145.915	162.072	161.208	67.0328	60.4311	69.1589
ENSG00000004399	protein_coding	PLXND1	0	0.173077	0.165192	0.279604	0.0179709	0.10731
ENSG00000004455	protein_coding	AK2	55.4452	61.6822	60.4538	47.2986	48.6549	48.192
ENSG00000004468	protein_coding	CD38	0	0	0	0	0	0
ENSG00000004478	protein_coding	FKBP4	129.694	132.128	137.269	62.7564	67.1465	72.8394
ENSG00000004487	protein_coding	KDM1A	73.4812	71.4912	78.1086	40.0743	42.174	43.7744
ENSG00000004534	protein_coding	RBM6	21.4755	18.7039	21.7873	25.1674	29.97	29.5346
ENSG00000004660	protein_coding	CAMKK1	1.84267	2.49424	1.73135	0.7082	0.776946	0.669854
ENSG00000004700	protein_coding	RECQL	35.8412	43.2618	51.872	28.5319	27.6464	26.3673
ENSG00000004766	protein_coding	VPS50	4.77616	9.03631	9.7846	4.34855	4.10087	3.93548
ENSG00000004776	protein_coding	HSPB6	0.588493	0	0.133298	1.78992	0.609053	1.35489
ENSG00000004777	protein_coding	ARHGAP33	2.02527	0.881163	0.524272	0.759204	0.266161	0.619369
ENSG00000004779	protein_coding	NDUFAB1	109.78	172.843	165.674	26.9699	33.3497	31.6877
ENSG00000004799	protein_coding	PDK4	0.111638	0.278184	0.15172	0.719045	0.462151	0.243497
ENSG00000004809	protein_coding	SLC22A16	0	0	0	0	0	0
ENSG00000004838	protein_coding	ZMYND10	0.351181	0.291697	0.238635	0.125662	0	0.106385
ENSG00000004846	protein_coding	ABCB5	0	0	0	0	0	0
ENSG00000004848	protein_coding	ARX	0	0	0	0	0	0
ENSG00000004864	protein_coding	SLC25A13	25.2957	32.2548	36.6079	15.9013	14.3869	15.7402
ENSG00000004866	protein_coding	ST7	8.35186	7.37467	7.70337	5.51934	6.17773	7.02951
ENSG00000004897	protein_coding	CDC27	22.7474	36.0598	44.2841	26.5735	26.5682	26.3749
ENSG00000004939	protein_coding	SLC4A1	0	0	0	0.0708366	0	0
ENSG00000004948	protein_coding	CALCR	0	0	0	0	0	0
ENSG00000004961	protein_coding	HCCS	39.8377	49.8146	54.9258	21.46	19.0462	22.0377
ENSG00000004975	protein_coding	DVL2	13.347	10.2152	10.322	8.69899	7.07108	8.10967
ENSG00000005001	protein_coding	PRSS22	58.3033	45.9533	48.6795	44.8467	33.9138	32.8232
ENSG00000005007	protein_coding	UPF1	48.0148	46.9371	50.0496	30.1195	23.4217	24.8737
ENSG00000005020	protein_coding	SKAP2	9.65168	11.0821	12.0883	15.7445	11.262	15.376
ENSG00000005022	protein_coding	SLC25A5	440.731	642.738	623.949	200.079	186.143	201.248
ENSG00000005059	protein_coding	MCUB	12.8426	15.1712	11.1186	2.85937	2.7567	4.49566
ENSG00000005073	protein_coding	HOXA11	0.380128	0.315741	0.172204	0.13602	0.131136	0.0460618
ENSG00000005075	protein_coding	POLR2J	137.771	107.594	112.953	131.015	116.495	129.834
ENSG00000005100	protein_coding	DHX33	19.804	17.7597	20.6027	12.3856	13.2105	14.0693
ENSG00000005102	protein_coding	MEOX1	0.189709	0	0.0859408	0.135766	0.0654454	0
ENSG00000005108	protein_coding	THSD7A	0	0	0.0420851	0.0997265	0.0320485	0.0112571
ENSG00000005156	protein_coding	LIG3	7.2744	5.97692	7.1074	6.69739	5.71083	7.08988
ENSG00000005175	protein_coding	RPAP3	13.8436	18.3507	22.3363	21.0019	22.8973	24.5303
ENSG00000005187	protein_coding	ACSM3	0.202642	0.112212	0.153	0.145022	0.0699072	0.24555
ENSG00000005189	protein_coding	REXO5	2.0962	1.22904	1.95508	1.5884	0.680607	0.941316
ENSG00000005194	protein_coding	CIAPIN1	56.5312	58.7881	61.2725	24.3599	24.4681	28.2363
ENSG00000005206	protein_coding	SPPL2B	11.0769	11.9268	11.8326	3.54768	2.31165	2.49391
ENSG00000005238	protein_coding	FAM214B	31.9772	28.0729	31.6973	27.926	23.3462	27.1812
ENSG00000005243	protein_coding	COPZ2	7.88379	11.9678	11.6997	4.6693	4.22028	5.30363
ENSG00000005249	protein_coding	PRKAR2B	0	0.0988635	0	0	0	0
ENSG00000005302	protein_coding	MSL3	6.22431	7.53961	8.08315	10.0968	10.7899	10.9363
ENSG00000005339	protein_coding	CREBBP	9.04513	6.26087	7.85369	10.7183	9.3046	10.2654
ENSG00000005379	protein_coding	TSPOAP1	0	0	0.0201779	0.0159381	0	0
ENSG00000005381	protein_coding	MPO	0	0	0	0	0	0
ENSG00000005421	protein_coding	PON1	0	0	0	0	0	0
ENSG00000005436	protein_coding	GCFC2	7.3371	8.25433	10.3501	1.69489	2.37094	1.80064
ENSG00000005448	protein_coding	WDR54	19.7434	19.7972	19.9025	10.1834	10.7381	11.6387
ENSG00000005469	protein_coding	CROT	15.1807	21.1567	22.4775	11.7027	12.0909	11.3087
ENSG00000005471	protein_coding	ABCB4	0.0656505	0.0545304	0	0.0234915	0.045296	0.0238655
ENSG00000005483	protein_coding	KMT2E	10.9115	8.08916	9.10076	26.7836	27.1587	25.7703
ENSG00000005486	protein_coding	RHBDD2	49.6669	59.2367	53.3649	29.5443	17.0608	20.0612
ENSG00000005513	protein_coding	SOX8	0	0.0942632	0	0	0	0.0687578
ENSG00000005700	protein_coding	IBTK	18.8507	33.2968	40.6687	12.5121	12.7854	11.3858
ENSG00000005801	protein_coding	ZNF195	3.59528	5.82868	6.14202	4.16946	4.67726	4.24108
ENSG00000005810	protein_coding	MYCBP2	8.44041	6.03557	6.81353	10.8773	11.2967	11.0158
ENSG00000005812	protein_coding	FBXL3	6.88228	11.2544	13.9001	4.41227	4.3775	4.53463
ENSG00000005844	protein_coding	ITGAL	0	0	0	0.0566273	0.027297	0
ENSG00000005882	protein_coding	PDK2	2.68893	2.54154	2.56227	6.138	5.40581	6.08964
ENSG00000005884	protein_coding	ITGA3	298.407	279.629	281.291	239.241	199.764	206.32
ENSG00000005889	protein_coding	ZFX	9.48661	9.60489	11.5958	8.39603	8.24947	8.55008
ENSG00000005893	protein_coding	LAMP2	43.3163	65.4617	71.8204	27.1776	26.9834	26.1199
ENSG00000005961	protein_coding	ITGA2B	0	0.0739871	0.0403522	0	0.0614578	0.0431743
ENSG00000005981	protein_coding	ASB4	0	0	0	0	0.0379942	0.0133455
ENSG00000006007	protein_coding	GDE1	62.0524	53.8453	61.7178	52.3883	51.2247	49.9317
ENSG00000006015	protein_coding	REX1BD	32.9658	37.7595	36.0734	6.67903	5.66027	4.59653
ENSG00000006016	protein_coding	CRLF1	2.05169	2.41424	2.63343	1.7742	1.65151	1.80244
ENSG00000006025	protein_coding	OSBPL7	4.32254	5.19322	4.89544	6.51833	5.2724	4.83562
ENSG00000006042	protein_coding	TMEM98	22.3959	22.989	21.9749	11.0584	10.0878	11.3766
ENSG00000006047	protein_coding	YBX2	0	0.181972	0.14887	0.313572	0.377891	0.199102
ENSG00000006059	protein_coding	KRT33A	0	0.323374	0.352733	0.139308	0	0.0471753
ENSG00000006062	protein_coding	MAP3K14	5.72795	4.23735	4.25716	2.36987	1.35851	2.15815
ENSG00000006071	protein_coding	ABCC8	0	0	0	0	0	0
ENSG00000006116	protein_coding	CACNG3	0	0	0	0	0	0
ENSG00000006118	protein_coding	TMEM132A	69.2096	73.7127	71.6187	52.2263	33.8642	35.2365
ENSG00000006125	protein_coding	AP2B1	117.815	86.0364	102.385	100.575	108.468	111.926
ENSG00000006128	protein_coding	TAC1	0.296309	0	0	0.106027	0	0
ENSG00000006194	protein_coding	ZNF263	10.9331	14.5431	13.5665	12.0767	11.1511	11.6545
ENSG00000006210	protein_coding	CX3CL1	0.170229	0.141395	0.231348	0.487299	0.293626	0.567252
ENSG00000006282	protein_coding	SPATA20	28.3249	29.1326	31.6053	16.4615	12.1979	12.3008
ENSG00000006283	protein_coding	CACNA1G	0.0504155	0	0	0.01804	0	0
ENSG00000006327	protein_coding	TNFRSF12A	493.831	446.437	420.813	259.509	249.528	251.233
ENSG00000006377	protein_coding	DLX6	0	0	0	0	0	0
ENSG00000006432	protein_coding	MAP3K9	11.5906	8.94693	10.2045	14.0103	14.03	15.5684
ENSG00000006451	protein_coding	RALA	106.871	133.859	161.808	59.5934	64.8859	62.5515
ENSG00000006453	protein_coding	BAIAP2L1	60.6086	53.7511	56.3432	51.6581	52.4531	56.6753
ENSG00000006459	protein_coding	KDM7A	3.51602	4.13359	4.26383	5.22607	5.0011	5.09296
ENSG00000006468	protein_coding	ETV1	0.527594	0.438228	0.64532	0.169908	0.200209	0.140648
ENSG00000006530	protein_coding	AGK	9.15259	8.86278	9.49557	6.09192	6.80569	6.61987
ENSG00000006534	protein_coding	ALDH3B1	1.53118	2.16211	2.15031	2.79428	2.00726	1.86468
ENSG00000006555	protein_coding	TTC22	6.64089	7.17085	6.91937	4.81199	3.551	3.80223
ENSG00000006576	protein_coding	PHTF2	3.93105	4.82469	6.35248	1.97349	1.96335	2.41726
ENSG00000006606	protein_coding	CCL26	0.718529	0.596822	1.30202	2.57109	4.21391	5.22403
ENSG00000006607	protein_coding	FARP2	8.29525	6.74358	8.39524	5.50708	5.79643	5.55197
ENSG00000006611	protein_coding	USH1C	0	0.100634	0	0	0	0
ENSG00000006625	protein_coding	GGCT	100.247	166.005	164.785	74.8168	57.6384	60.4668
ENSG00000006634	protein_coding	DBF4	9.27348	11.5541	11.0527	5.41199	5.21766	4.90953
ENSG00000006638	protein_coding	TBXA2R	0.538325	0.596189	0.406448	0.192627	0	0.130462
ENSG00000006652	protein_coding	IFRD1	9.24554	14.8508	16.6919	6.95717	6.84807	6.63132
ENSG00000006659	protein_coding	LGALS14	0	0	0	0	0	0
ENSG00000006695	protein_coding	COX10	5.85671	6.11204	6.19074	3.62715	4.27401	2.95701
ENSG00000006704	protein_coding	GTF2IRD1	13.896	13.3579	13.2621	10.9504	9.02206	8.89216
ENSG00000006712	protein_coding	PAF1	81.521	72.0002	76.36	101.905	97.6936	100.12
ENSG00000006715	protein_coding	VPS41	12.237	16.4694	18.439	17.6789	21.1527	20.3312
ENSG00000006740	protein_coding	ARHGAP44	0.761847	0.497202	0.813515	0.36997	0.281594	0.494551
ENSG00000006744	protein_coding	ELAC2	58.3207	59.1536	63.3098	28.2052	26.9675	30.9542
ENSG00000006747	protein_coding	SCIN	0.0436333	0.0362426	0.0395331	0.0780659	0.0451577	0.111032
ENSG00000006756	protein_coding	ARSD	11.3355	8.15606	8.34052	11.1867	10.5359	11.181
ENSG00000006757	protein_coding	PNPLA4	33.1644	31.8704	29.2394	27.1932	27.9612	30.8158
ENSG00000006788	protein_coding	MYH13	0.0828891	0	0	0	0	0
ENSG00000006831	protein_coding	ADIPOR2	52.0244	43.5014	53.2837	28.4528	27.6112	28.8108
ENSG00000006837	protein_coding	CDKL3	0.322186	1.20426	0.729774	0.979937	1.33377	1.38594
ENSG00000007001	protein_coding	UPP2	0	0	0	0	0	0
ENSG00000007038	protein_coding	PRSS21	2.06317	2.14213	2.6871	2.21477	1.33453	2.65628
ENSG00000007047	protein_coding	MARK4	30.1808	22.3466	23.7885	22.8535	20.0347	21.6842
ENSG00000007062	protein_coding	PROM1	0.068238	0.0566796	0	0	0.0706219	0.008269
ENSG00000007080	protein_coding	CCDC124	168.89	190.257	170.729	90.4862	34.0309	50.8113
ENSG00000007129	protein_coding	CEACAM21	0	0	0	0	0	0
ENSG00000007168	protein_coding	PAFAH1B1	47.6483	51.2661	59.3318	40.2394	45.2461	47.7007
ENSG00000007171	protein_coding	NOS2	0	0	0	0.0825273	0	0
ENSG00000007174	protein_coding	DNAH9	0.089832	0.12436	0.0271301	0.0321443	0.0413201	0.0253991
ENSG00000007202	protein_coding	KIAA0100	54.6184	45.6409	57.0781	67.0865	62.0238	63.2272
ENSG00000007216	protein_coding	SLC13A2	0	0	0	0	0.0542471	0
ENSG00000007237	protein_coding	GAS7	0.0502259	0.0417184	0.113765	0.0179722	0.0346537	0.0791191
ENSG00000007255	protein_coding	TRAPPC6A	8.69936	12.1936	8.8671	7.1985	5.62705	5.13892
ENSG00000007264	protein_coding	MATK	0	0.101826	0	0	0	0
ENSG00000007306	protein_coding	CEACAM7	0.764842	0.476468	0.606348	1.0263	0.725598	0.301207
ENSG00000007312	protein_coding	CD79B	0	0	0	0	0	0
ENSG00000007314	protein_coding	SCN4A	0	0	0	0	0	0
ENSG00000007341	protein_coding	ST7L	2.75288	3.53382	2.97602	2.12682	2.46055	2.28198
ENSG00000007350	protein_coding	TKTL1	0	0	0	0	0	0
ENSG00000007372	protein_coding	PAX6	0	0.0204155	0.0222691	0	0.008479	0
ENSG00000007376	protein_coding	RPUSD1	61.5552	62.5415	61.5803	14.0941	6.19361	8.08049
ENSG00000007384	protein_coding	RHBDF1	33.0342	28.6392	28.6673	18.1371	11.5385	14.4479
ENSG00000007392	protein_coding	LUC7L	16.5918	18.2842	18.6792	9.34634	11.731	9.6046
ENSG00000007402	protein_coding	CACNA2D2	0.0802406	0.0666492	0.0727003	0.0574245	0.0830439	0.097231
ENSG00000007516	protein_coding	BAIAP3	0	0.137116	0.112173	0.0886034	0.14237	0.110017
ENSG00000007520	protein_coding	TSR3	127.03	214.509	218.221	77.4081	64.3599	74.2205
ENSG00000007541	protein_coding	PIGQ	16.5585	16.6858	14.9734	3.7893	2.21408	2.75306
ENSG00000007545	protein_coding	CRAMP1	7.84881	5.63704	6.41617	5.63815	4.90638	5.25594
ENSG00000007866	protein_coding	TEAD3	48.4155	37.589	37.0825	47.7462	34.7247	38.3655
ENSG00000007908	protein_coding	SELE	0	0	0	0	0	0
ENSG00000007923	protein_coding	DNAJC11	61.2769	65.1556	67.3187	35.8895	31.2268	35.2636
ENSG00000007933	protein_coding	FMO3	0.147508	0.122523	0	0.263912	0.0508872	0.0178742
ENSG00000007944	protein_coding	MYLIP	4.95392	4.52629	4.63801	2.18626	2.22169	2.081
ENSG00000007952	protein_coding	NOX1	0	0	0.090368	0.0713798	0.0688168	0
ENSG00000007968	protein_coding	E2F2	0.742997	0.925719	0.462809	0.0996991	0.160199	0.146302
ENSG00000008018	protein_coding	PSMB1	260.842	317.109	320.941	142.417	140.931	134.019
ENSG00000008056	protein_coding	SYN1	0.543564	0.225747	0.307803	0.486255	0.375036	0.296397
ENSG00000008083	protein_coding	JARID2	16.8173	16.3981	19.2486	33.1409	29.0641	28.6575
ENSG00000008086	protein_coding	CDKL5	1.51737	0.995017	1.20595	2.10515	1.97446	2.13866
ENSG00000008118	protein_coding	CAMK1G	0.152428	0.126609	0.207157	0.0545429	0.0525845	0.147763
ENSG00000008128	protein_coding	CDK11A	17.5578	19.6384	18.5743	22.4177	21.2342	22.1822
ENSG00000008130	protein_coding	NADK	39.526	41.9843	42.248	16.4573	14.4525	14.5121
ENSG00000008196	protein_coding	TFAP2B	0	0	0	0	0	0
ENSG00000008197	protein_coding	TFAP2D	0	0	0	0	0	0
ENSG00000008226	protein_coding	DLEC1	0.121679	0.151603	0.0551225	0.13062	0.104942	0.0589776
ENSG00000008256	protein_coding	CYTH3	23.0582	23.3603	22.395	18.0956	15.0354	15.6425
ENSG00000008277	protein_coding	ADAM22	0	0.0345402	0.0565142	0.0446395	0.0143455	0.0151167
ENSG00000008282	protein_coding	SYPL1	87.5621	163.644	195.794	56.8379	69.8382	71.0275
ENSG00000008283	protein_coding	CYB561	32.0882	30.3128	26.7731	11.482	9.88016	10.1327
ENSG00000008294	protein_coding	SPAG9	19.8402	21.4094	25.3889	17.7029	17.0526	17.1987
ENSG00000008300	protein_coding	CELSR3	0.769163	0.304228	0.398219	0.484924	0.429606	0.483767
ENSG00000008311	protein_coding	AASS	6.24206	3.28789	4.48301	6.047	6.74899	5.69127
ENSG00000008323	protein_coding	PLEKHG6	5.12044	4.05531	5.66423	4.13318	2.91669	2.5973
ENSG00000008324	protein_coding	SS18L2	17.9776	45.1221	41.7829	7.27194	6.20189	7.86127
ENSG00000008382	protein_coding	MPND	8.66513	9.2538	9.08456	5.22675	1.87898	3.14997
ENSG00000008394	protein_coding	MGST1	135.596	173.248	187.129	72.59	87.585	93.0351
ENSG00000008405	protein_coding	CRY1	4.5615	6.96093	8.12153	3.64404	3.54979	3.76632
ENSG00000008438	protein_coding	PGLYRP1	0	0	0.324584	0.256383	0	0
ENSG00000008441	protein_coding	NFIX	14.6501	10.6977	11.0491	19.183	15.995	17.2938
ENSG00000008513	protein_coding	ST3GAL1	14.6133	8.33002	9.83918	14.5797	15.5785	16.2076
ENSG00000008516	protein_coding	MMP25	0.955782	0.893125	0.920089	1.28252	0.82431	1.36084
ENSG00000008517	protein_coding	IL32	24.8187	12.9992	12.7471	57.7534	61.2967	59.9753
ENSG00000008710	protein_coding	PKD1	9.00483	7.91151	8.31983	4.46599	2.30389	2.91859
ENSG00000008735	protein_coding	MAPK8IP2	0.43784	0.290942	0.277687	0.814689	0.513554	0.562382
ENSG00000008838	protein_coding	MED24	41.2412	39.8842	39.5773	19.2157	16.1377	18.5945
ENSG00000008853	protein_coding	RHOBTB2	37.3908	35.5399	33.004	47.5039	39.9471	41.5993
ENSG00000008869	protein_coding	HEATR5B	8.55937	10.3319	12.5531	10.0036	11.4501	11.4015
ENSG00000008952	protein_coding	SEC62	42.5507	33.0048	41.19	57.194	67.8549	62.9504
ENSG00000008988	protein_coding	RPS20	752.642	891.136	789.929	428.281	381.307	401.189
ENSG00000009307	protein_coding	CSDE1	224.141	222.273	250.527	255.031	262.138	272.027
ENSG00000009335	protein_coding	UBE3C	52.3521	46.9139	56.4103	34.5506	34.5824	37.5154
ENSG00000009413	protein_coding	REV3L	2.40882	2.74687	3.53263	2.00146	2.2817	1.96405
ENSG00000009694	protein_coding	TENM1	0	0.0653468	0	0.0140756	0	0.004767
ENSG00000009709	protein_coding	PAX7	0	0	0	0	0	0
ENSG00000009724	protein_coding	MASP2	0.714984	0.989796	0.755762	0.810162	0.904398	0.938575
ENSG00000009765	protein_coding	IYD	0.0489559	0.0406636	0.0665332	0.105106	0.0168887	0.142373
ENSG00000009780	protein_coding	FAM76A	8.04809	6.99823	7.57664	4.45473	4.94549	4.78468
ENSG00000009790	protein_coding	TRAF3IP3	0.916379	0.652423	0.50409	0.749497	0.451616	0.436235
ENSG00000009830	protein_coding	POMT2	8.66757	7.99937	8.58787	6.09416	5.94528	6.44299
ENSG00000009844	protein_coding	VTA1	24.3227	31.7556	35.1136	13.13	13.623	15.0244
ENSG00000009950	protein_coding	MLXIPL	0.316063	0	0.0477271	0.113096	0	0.0893637
ENSG00000009954	protein_coding	BAZ1B	44.9799	25.3649	30.1091	42.1144	43.3785	43.9951
ENSG00000010017	protein_coding	RANBP9	39.5393	35.7536	48.3367	29.5006	31.3919	32.4677
ENSG00000010030	protein_coding	ETV7	0.213682	0.532464	0.0968011	0.688151	0.810873	0.569641
ENSG00000010072	protein_coding	SPRTN	6.01248	8.84663	8.21013	4.30285	4.23724	4.06951
ENSG00000010165	protein_coding	EEF1AKNMT	26.6154	34.5356	37.0713	19.995	19.2771	21.5007
ENSG00000010219	protein_coding	DYRK4	8.98925	8.12368	7.33007	4.6319	5.11061	5.18491
ENSG00000010244	protein_coding	ZNF207	40.7517	43.8281	46.8058	21.0821	19.6951	22.0543
ENSG00000010256	protein_coding	UQCRC1	162.602	176.091	171.494	76.0294	65.1611	72.4626
ENSG00000010270	protein_coding	STARD3NL	22.284	26.1652	33.3504	14.5282	12.8393	14.7453
ENSG00000010278	protein_coding	CD9	407.165	360.556	368.407	189.625	194.539	160.514
ENSG00000010282	protein_coding	HHATL	0	0	0	0	0	0
ENSG00000010292	protein_coding	NCAPD2	27.4418	14.4577	14.8468	20.3122	19.9344	21.082
ENSG00000010295	protein_coding	IFFO1	0.87748	0.9718	1.01586	0.453536	0.43725	0.259913
ENSG00000010310	protein_coding	GIPR	1.2009	2.7431	2.40278	2.72153	2.83095	2.54657
ENSG00000010318	protein_coding	PHF7	2.26196	1.87882	3.00578	2.05045	1.6647	1.84555
ENSG00000010319	protein_coding	SEMA3G	0	0.0834865	0.0910663	0.0719314	0	0
ENSG00000010322	protein_coding	NISCH	21.7198	19.7612	21.0736	22.5547	16.6079	16.4222
ENSG00000010327	protein_coding	STAB1	0	0	0	0.0171438	0	0.0464446
ENSG00000010361	protein_coding	FUZ	4.12284	4.28063	3.34631	1.47526	1.77786	1.26977
ENSG00000010379	protein_coding	SLC6A13	0	0.198612	0.162483	0.256685	0.164979	0.217309
ENSG00000010404	protein_coding	IDS	38.3709	28.5619	33.9491	34.921	31.8971	36.5748
ENSG00000010438	protein_coding	PRSS3	81.3967	93.691	86.1772	11.5631	8.72902	12.6337
ENSG00000010539	protein_coding	ZNF200	2.77388	2.97838	5.05708	1.86409	2.00721	1.92656
ENSG00000010610	protein_coding	CD4	0.333957	0.554781	0.151288	0.199165	0.345624	0.202335
ENSG00000010626	protein_coding	LRRC23	5.31881	4.55595	5.04488	6.18544	4.81654	7.29094
ENSG00000010671	protein_coding	BTK	0	0	0.100462	0	0	0.0403078
ENSG00000010704	protein_coding	HFE	9.92215	7.87027	9.31371	6.58906	5.51986	5.93573
ENSG00000010803	protein_coding	SCMH1	13.9169	13.6441	11.3688	12.123	11.2548	11.3761
ENSG00000010810	protein_coding	FYN	6.63963	5.51499	7.06999	6.63765	6.35208	6.00511
ENSG00000010818	protein_coding	HIVEP2	9.71238	6.92045	8.10952	15.0087	15.6524	15.6342
ENSG00000010932	protein_coding	FMO1	0	0	0	0	0	0
ENSG00000011007	protein_coding	ELOA	49.119	57.0562	60.7871	42.3914	41.2913	44.4231
ENSG00000011009	protein_coding	LYPLA2	196.788	217.454	215.82	108.588	72.044	84.4939
ENSG00000011021	protein_coding	CLCN6	5.33784	5.87723	6.18589	6.17426	5.73844	5.76864
ENSG00000011028	protein_coding	MRC2	10.6213	9.84507	9.34425	11.4293	7.62029	7.7035
ENSG00000011052	protein_coding	NME1-NME2	216.238	162.295	151.476	131.934	125.786	141.414
ENSG00000011083	protein_coding	SLC6A7	0	0	0	0	0	0.0287442
ENSG00000011105	protein_coding	TSPAN9	9.33015	8.72613	8.65308	6.83489	5.5757	6.48078
ENSG00000011114	protein_coding	BTBD7	10.3847	10.8564	14.0321	10.1387	11.4114	11.7537
ENSG00000011132	protein_coding	APBA3	5.80164	8.20726	8.04895	3.47079	2.75198	2.52644
ENSG00000011143	protein_coding	MKS1	8.2181	8.99804	9.02526	4.99021	5.15467	6.38232
ENSG00000011198	protein_coding	ABHD5	10.9679	13.5813	15.5155	6.62126	9.19226	7.85185
ENSG00000011201	protein_coding	ANOS1	0.501408	0.713962	0.973478	1.30718	1.1614	1.33667
ENSG00000011243	protein_coding	AKAP8L	44.6455	48.4489	44.6581	41.2429	42.1395	40.8344
ENSG00000011258	protein_coding	MBTD1	2.89512	4.04699	4.73431	3.25946	3.38602	3.80761
ENSG00000011260	protein_coding	UTP18	30.5908	53.4685	56.9626	8.59579	10.2294	10.7338
ENSG00000011275	protein_coding	RNF216	15.0473	11.7243	13.0904	11.0307	8.86605	9.18129
ENSG00000011295	protein_coding	TTC19	18.602	23.1767	25.243	12.7729	12.2275	13.2097
ENSG00000011304	protein_coding	PTBP1	170.175	156.287	163.765	71.3364	48.2315	55.9414
ENSG00000011332	protein_coding	DPF1	0.528418	0.35113	0.622391	0.189082	0.364586	0.16648
ENSG00000011347	protein_coding	SYT7	1.81364	1.56223	1.00418	2.5478	1.92334	2.29534
ENSG00000011376	protein_coding	LARS2	10.3034	9.47517	9.74271	7.98818	8.09629	8.15992
ENSG00000011405	protein_coding	PIK3C2A	11.96	12.4063	17.3028	12.3261	10.3054	11.5138
ENSG00000011422	protein_coding	PLAUR	41.5431	36.8699	39.8048	26.5538	21.8702	24.5216
ENSG00000011426	protein_coding	ANLN	48.5542	20.0244	25.4446	21.3391	24.8626	23.8518
ENSG00000011451	protein_coding	WIZ	19.7616	19.8987	19.6218	15.1733	10.4091	12.8181
ENSG00000011454	protein_coding	RABGAP1	17.6836	14.4581	15.0174	17.416	18.7795	18.506
ENSG00000011465	protein_coding	DCN	0	0	0.0732565	0.0867958	0.0139465	0.03919
ENSG00000011478	protein_coding	QPCTL	17.8798	14.0896	15.5765	7.87429	4.90288	6.11084
ENSG00000011485	protein_coding	PPP5C	31.5575	31.2644	29.1755	17.1814	14.9105	17.4463
ENSG00000011523	protein_coding	CEP68	3.76505	2.83413	2.90489	3.05233	3.16597	3.1722
ENSG00000011566	protein_coding	MAP4K3	8.6278	11.6193	14.951	9.8013	9.62275	9.22651
ENSG00000011590	protein_coding	ZBTB32	0	0	0.167803	0.132544	0.0638923	0.112211
ENSG00000011600	protein_coding	TYROBP	0	0	0	0	0	0
ENSG00000011638	protein_coding	TMEM159	33.118	45.6277	42.5832	20.7207	22.9184	24.2225
ENSG00000011677	protein_coding	GABRA3	0	0.203063	0.0553749	0.131218	0.0421689	0.0592477
ENSG00000012048	protein_coding	BRCA1	7.08646	3.0789	3.85232	2.4382	3.06525	3.17057
ENSG00000012061	protein_coding	ERCC1	66.3214	85.4652	88.8972	39.4224	34.3976	38.3523
ENSG00000012124	protein_coding	CD22	0	0.0683465	0	0	0.0283862	0
ENSG00000012171	protein_coding	SEMA3B	5.80454	6.06321	5.93638	2.73789	2.09346	2.21665
ENSG00000012174	protein_coding	MBTPS2	4.93387	5.13447	5.57494	2.5163	2.66072	2.28835
ENSG00000012211	protein_coding	PRICKLE3	21.0905	21.6671	22	16.5333	15.3652	15.216
ENSG00000012223	protein_coding	LTF	0	0	0	0	0	0
ENSG00000012232	protein_coding	EXTL3	23.2138	18.1836	19.2709	16.6826	14.2861	15.0729
ENSG00000012504	protein_coding	NR1H4	0	0	0	0	0	0
ENSG00000012660	protein_coding	ELOVL5	67.0521	72.9334	90.4035	86.7844	111.298	101.772
ENSG00000012779	protein_coding	ALOX5	0.136	0.225928	0.18483	1.02196	1.3606	1.10414
ENSG00000012817	protein_coding	KDM5D	0	0	0	0	0	0
ENSG00000012822	protein_coding	CALCOCO1	14.7658	12.2173	12.6034	32.5991	33.887	32.7174
ENSG00000012963	protein_coding	UBR7	25.299	18.4921	19.4506	10.0355	11.1713	10.3705
ENSG00000012983	protein_coding	MAP4K5	17.3088	23.8326	31.0328	14.8407	15.3643	16.3031
ENSG00000013016	protein_coding	EHD3	12.1958	9.51872	11.526	12.7157	11.1348	12.6633
ENSG00000013275	protein_coding	PSMC4	131.097	147.062	144.282	57.303	55.7945	58.5044
ENSG00000013288	protein_coding	MAN2B2	15.7026	14.1812	15.4687	17.2447	12.3903	14.2672
ENSG00000013293	protein_coding	SLC7A14	0	0	0	0	0	0
ENSG00000013297	protein_coding	CLDN11	0.271855	0.225807	0.123154	0.243193	0.0937841	0.0329418
ENSG00000013306	protein_coding	SLC25A39	194.223	187.017	173.495	92.2009	58.9624	71.5284
ENSG00000013364	protein_coding	MVP	160.007	195.48	196.837	116.342	83.0692	97.4843
ENSG00000013374	protein_coding	NUB1	25.0312	24.607	23.8257	39.4169	38.0986	40.5101
ENSG00000013375	protein_coding	PGM3	17.0948	21.5242	22.5258	10.5348	11.6543	12.0341
ENSG00000013392	protein_coding	RWDD2A	2.82645	3.57745	3.41447	1.87828	2.69304	2.34853
ENSG00000013441	protein_coding	CLK1	20.1146	27.0581	26.0921	22.1193	22.9837	20.3194
ENSG00000013503	protein_coding	POLR3B	10.4265	11.2232	12.5796	7.95668	9.90988	10.752
ENSG00000013523	protein_coding	ANGEL1	7.72954	7.28074	8.44715	6.35858	6.13026	6.91362
ENSG00000013561	protein_coding	RNF14	22.2724	39.2804	43.9985	13.1372	13.4022	14.628
ENSG00000013563	protein_coding	DNASE1L1	55.246	66.691	67.6848	26.2262	21.3034	21.7494
ENSG00000013573	protein_coding	DDX11	12.9139	6.89923	6.92136	4.12198	3.45108	3.88638
ENSG00000013583	protein_coding	HEBP1	29.4484	29.7457	27.5526	14.0322	15.8257	15.6901
ENSG00000013588	protein_coding	GPRC5A	194.318	151.668	169.958	279.204	296.652	314.514
ENSG00000013619	protein_coding	MAMLD1	1.44743	2.47524	1.88998	1.46239	1.14553	1.17615
ENSG00000013725	protein_coding	CD6	0.425714	0.0707211	0.269997	0.0609328	0.0293725	0.082537
ENSG00000013810	protein_coding	TACC3	23.4406	12.0211	11.9078	6.1303	5.03539	5.29857
ENSG00000014123	protein_coding	UFL1	25.5932	25.4355	32.9596	12.1972	13.0701	12.7435
ENSG00000014138	protein_coding	POLA2	13.1193	5.14587	6.14962	1.36922	1.85436	1.52349
ENSG00000014164	protein_coding	ZC3H3	24.2666	19.7033	19.3924	6.24413	4.23276	4.49333
ENSG00000014216	protein_coding	CAPN1	243.465	227.219	232.635	179.188	131.257	144.668
ENSG00000014257	protein_coding	ACP3	1.18524	0.689134	0.751701	0.296877	0.531545	0.517033
ENSG00000014641	protein_coding	MDH1	66.282	94.0663	94.5473	23.0991	25.0052	27.1377
ENSG00000014824	protein_coding	SLC30A9	14.4454	23.9972	28.8574	12.4307	11.5468	13.0726
ENSG00000014914	protein_coding	MTMR11	5.54769	5.43745	4.47347	6.9876	7.15774	7.75763
ENSG00000014919	protein_coding	COX15	19.7957	24.0083	25.7479	15.9486	16.8004	14.5396
ENSG00000015133	protein_coding	CCDC88C	5.42962	4.64557	5.78861	7.18713	6.35164	6.28249
ENSG00000015153	protein_coding	YAF2	2.10607	2.79893	2.96825	1.13878	1.0656	1.24765
ENSG00000015171	protein_coding	ZMYND11	24.8855	27.6664	28.6607	25.6181	27.9341	27.5685
ENSG00000015285	protein_coding	WAS	0	0.713861	0.48667	0.845704	0.44473	0.546742
ENSG00000015413	protein_coding	DPEP1	0	0	0	0	0	0
ENSG00000015475	protein_coding	BID	23.3902	29.3793	27.2914	14.4937	11.5329	13.1207
ENSG00000015479	protein_coding	MATR3	0	7.43618	5.20182	0.905331	0	0
ENSG00000015520	protein_coding	NPC1L1	0.0965882	0	0.0437559	0	0	0
ENSG00000015532	protein_coding	XYLT2	41.0683	33.65	38.133	29.1585	19.5085	21.2537
ENSG00000015568	protein_coding	RGPD5	3.71923	0.445565	0.0648025	0.102372	0.0493482	0.264338
ENSG00000015592	protein_coding	STMN4	0	0	0	0	0	0
ENSG00000015676	protein_coding	NUDCD3	25.6384	22.4882	22.3929	17.5042	15.9381	16.2046
ENSG00000016082	protein_coding	ISL1	8.10353	6.73093	6.93415	1.41761	1.42883	1.74567
ENSG00000016391	protein_coding	CHDH	0.0651446	0	0.0295115	0.163174	0.0224735	0.0394693
ENSG00000016402	protein_coding	IL20RA	2.0377	2.85061	3.98395	2.45607	1.84991	1.68944
ENSG00000016490	protein_coding	CLCA1	0	0	0	0	0	0.0185708
ENSG00000016602	protein_coding	CLCA4	3.09049	11.4904	10.4003	8.00431	8.42767	8.18523
ENSG00000016864	protein_coding	GLT8D1	32.0487	34.751	39.121	19.8169	17.9488	17.0938
ENSG00000017260	protein_coding	ATP2C1	31.2704	45.133	50.6041	32.6747	34.024	32.2655
ENSG00000017427	protein_coding	IGF1	0	0	0	0	0	0
ENSG00000017483	protein_coding	SLC38A5	148.22	159.398	152.88	99.9754	80.7496	82.153
ENSG00000017797	protein_coding	RALBP1	38.483	40.3488	41.297	28.1726	24.7017	27.5814
ENSG00000018189	protein_coding	RUFY3	6.41855	8.01943	8.67422	7.5078	9.41526	9.0129
ENSG00000018236	protein_coding	CNTN1	7.24494	9.16726	9.17137	3.94922	3.99429	4.27464
ENSG00000018280	protein_coding	SLC11A1	0.175408	0.194263	0.0794626	0.167376	0.201707	0.148785
ENSG00000018408	protein_coding	WWTR1	17.7274	14.2238	14.7777	9.60132	10.6503	11.4273
ENSG00000018510	protein_coding	AGPS	17.7119	21.5677	26.3822	11.6295	10.8362	11.3007
ENSG00000018610	protein_coding	CXorf56	16.9094	20.2512	19.6849	10.6238	13.4981	12.556
ENSG00000018625	protein_coding	ATP1A2	0	0	0	0	0.0277868	0.00976
ENSG00000018699	protein_coding	TTC27	20.7745	22.7628	27.7663	9.85885	10.3181	11.2298
ENSG00000018869	protein_coding	ZNF582	2.42284	3.89912	4.04733	1.51717	1.51493	1.72481
ENSG00000019102	protein_coding	VSIG2	8.41379	11.0653	14.7698	5.77047	4.59574	7.09426
ENSG00000019144	protein_coding	PHLDB1	8.66688	7.72276	8.371	9.95574	8.67954	8.69319
ENSG00000019169	protein_coding	MARCO	1.95202	1.41871	1.76859	2.09546	2.10439	1.92184
ENSG00000019186	protein_coding	CYP24A1	60.8025	41.2059	44.8317	42.1481	32.9114	37.2547
ENSG00000019485	protein_coding	PRDM11	1.74674	0.906793	1.121	0.781286	0.803448	0.899553
ENSG00000019505	protein_coding	SYT13	0	0	0	0.0333368	0	0
ENSG00000019549	protein_coding	SNAI2	94.1586	120.461	136.651	122.322	129.931	126.049
ENSG00000019582	protein_coding	CD74	6.79205	5.90604	4.47112	12.3418	10.1779	9.38759
ENSG00000019991	protein_coding	HGF	0	0	0	0	0	0
ENSG00000019995	protein_coding	ZRANB1	6.8563	4.21848	7.40072	12.6303	13.52	13.0365
ENSG00000020129	protein_coding	NCDN	24.7605	28.7074	32.9028	14.2129	9.36044	11.6013
ENSG00000020181	protein_coding	ADGRA2	0.0716094	0.17844	0.0324401	0.0256238	0	0
ENSG00000020256	protein_coding	ZFP64	14.8673	13.466	13.6394	16.4677	13.2217	14.358
ENSG00000020426	protein_coding	MNAT1	27.608	30.1046	29.3407	18.2596	17.9199	16.6318
ENSG00000020577	protein_coding	SAMD4A	7.3215	6.49134	7.472	9.78757	8.89692	9.79384
ENSG00000020633	protein_coding	RUNX3	3.02821	2.14265	2.38799	1.68556	1.27682	1.45417
ENSG00000020922	protein_coding	MRE11	6.53152	6.24719	6.9937	4.9576	4.9389	5.16442
ENSG00000021300	protein_coding	PLEKHB1	0	0.0854158	0	0.0367969	0.212854	0.0872261
ENSG00000021355	protein_coding	SERPINB1	191.458	283.071	299.871	97.938	90.401	110.593
ENSG00000021461	protein_coding	CYP3A43	0	0	0	0	0	0
ENSG00000021488	protein_coding	SLC7A9	0	0	0	0	0	0.0473206
ENSG00000021574	protein_coding	SPAST	2.29853	4.4844	6.15076	2.50569	2.91361	2.29944
ENSG00000021645	protein_coding	NRXN3	0.0979749	0.0271265	0	0.0701161	0.0901313	0.0870616
ENSG00000021762	protein_coding	OSBPL5	4.88749	3.55218	3.69018	2.35613	1.94368	2.03993
ENSG00000021776	protein_coding	AQR	10.1977	10.1959	11.2756	9.62262	10.2543	11.8673
ENSG00000021826	protein_coding	CPS1	4.37391	4.62735	4.81804	5.50257	5.4797	5.95837
ENSG00000021852	protein_coding	C8B	0.371363	0	0	0.332209	0.256224	0.0674994
ENSG00000022267	protein_coding	FHL1	36.4322	31.3394	34.5375	10.9927	10.1502	11.1467
ENSG00000022277	protein_coding	RTF2	57.4328	75.9126	72.6804	32.4348	29.7627	31.8316
ENSG00000022355	protein_coding	GABRA1	0.0602472	0	0	0	0	0
ENSG00000022556	protein_coding	NLRP2	30.0528	37.31	38.9865	19.5809	20.2361	20.4476
ENSG00000022567	protein_coding	SLC45A4	4.24306	3.47541	3.41719	2.27742	1.52475	1.87093
ENSG00000022840	protein_coding	RNF10	79.2734	81.2004	81.7953	46.2719	48.8223	48.9047
ENSG00000022976	protein_coding	ZNF839	5.71712	10.402	9.57867	4.70845	4.97767	5.04731
ENSG00000023041	protein_coding	ZDHHC6	26.9341	31.8153	36.7272	11.0907	11.813	12.6777
ENSG00000023171	protein_coding	GRAMD1B	0.916528	1.07144	1.06107	1.55477	1.14762	1.4191
ENSG00000023191	protein_coding	RNH1	87.8489	96.7965	94.5214	25.4776	14.002	16.5552
ENSG00000023228	protein_coding	NDUFS1	18.0844	23.0164	25.1061	22.0674	24.5812	26.1046
ENSG00000023287	protein_coding	RB1CC1	10.5281	13.8367	15.6665	10.7533	10.712	10.5127
ENSG00000023318	protein_coding	ERP44	68.8966	76.5943	84.3131	56.6303	60.9301	53.1465
ENSG00000023330	protein_coding	ALAS1	54.0086	63.6354	70.8628	42.2303	41.7491	45.278
ENSG00000023445	protein_coding	BIRC3	0.742231	1.28907	1.89518	7.99185	7.28589	7.15427
ENSG00000023516	protein_coding	AKAP11	8.23724	10.4967	12.794	10.8747	9.49577	10.3844
ENSG00000023572	protein_coding	GLRX2	8.16878	15.945	15.5424	1.43227	1.32448	1.20761
ENSG00000023608	protein_coding	SNAPC1	33.8448	53.7867	51.0483	26.5313	25.3087	25.958
ENSG00000023697	protein_coding	DERA	50.133	50.4789	57.2676	20.1329	23.3915	22.6167
ENSG00000023734	protein_coding	STRAP	193.294	339.939	391.759	267.402	293.591	271.964
ENSG00000023839	protein_coding	ABCC2	0.258916	0.64518	0.850372	0.301103	0.357282	0.274522
ENSG00000023892	protein_coding	DEF6	35.012	37.5773	30.0289	14.0063	9.63558	12.0126
ENSG00000023902	protein_coding	PLEKHO1	2.37226	2.41538	2.56534	1.56081	1.71596	1.49292
ENSG00000023909	protein_coding	GCLM	18.8851	22.6753	25.4116	16.6264	16.868	16.4606
ENSG00000024048	protein_coding	UBR2	15.4365	13.6798	14.1419	15.2156	16.6093	15.9584
ENSG00000024422	protein_coding	EHD2	302.072	206.732	213.007	273.695	212.924	244.646
ENSG00000024526	protein_coding	DEPDC1	4.55385	2.78335	3.38637	1.72172	1.57098	1.32226
ENSG00000024862	protein_coding	CCDC28A	17.1674	15.6576	17.6891	11.4428	12.1932	15.9078
ENSG00000025039	protein_coding	RRAGD	1.09521	0.4962	1.26292	1.71009	1.61434	1.13408
ENSG00000025156	protein_coding	HSF2	6.58318	10.155	11.2474	4.37476	4.80166	3.57831
ENSG00000025293	protein_coding	PHF20	16.9053	14.3438	15.2344	14.9387	15.0294	15.3307
ENSG00000025423	protein_coding	HSD17B6	0	0	0.303441	0.319576	0.308101	0.243497
ENSG00000025434	protein_coding	NR1H3	3.24463	3.34557	3.19315	2.88252	2.16146	2.15563
ENSG00000025708	protein_coding	TYMP	35.9324	73.3862	75.8359	36.2534	26.2502	26.2611
ENSG00000025770	protein_coding	NCAPH2	19.1126	18.4267	17.0074	4.76289	3.84618	4.01157
ENSG00000025772	protein_coding	TOMM34	71.7341	82.8618	85.6093	46.4607	45.3247	45.2064
ENSG00000025796	protein_coding	SEC63	37.2533	45.0439	48.3057	51.1062	55.7986	54.2768
ENSG00000025800	protein_coding	KPNA6	44.6261	29.0435	33.3137	40.0671	40.365	42.642
ENSG00000026025	protein_coding	VIM	255.307	289.967	327.482	139.962	126.991	128.734
ENSG00000026036	protein_coding	RTEL1-TNFRSF6B	2.39889	1.76086	2.70419	1.23767	0.827565	0.290684
ENSG00000026103	protein_coding	FAS	13.7324	22.3595	24.472	9.66495	8.6277	8.30906
ENSG00000026297	protein_coding	RNASET2	8.69473	10.1439	7.96788	2.13747	2.65604	2.54146
ENSG00000026508	protein_coding	CD44	224.078	218.007	245.38	328.472	352.714	362.248
ENSG00000026559	protein_coding	KCNG1	7.11974	3.50158	3.35266	1.97777	1.03417	1.48707
ENSG00000026652	protein_coding	AGPAT4	2.52697	2.15807	1.96705	2.53436	2.57842	2.70409
ENSG00000026751	protein_coding	SLAMF7	8.71184	7.7593	7.46524	4.95769	6.26426	7.31325
ENSG00000026950	protein_coding	BTN3A1	3.84651	2.58641	2.03295	7.20963	8.15134	7.63513
ENSG00000027001	protein_coding	MIPEP	22.1599	27.3608	26.3178	8.6259	8.93601	8.72692
ENSG00000027075	protein_coding	PRKCH	6.66417	6.68062	6.61049	6.78383	7.31318	6.87789
ENSG00000027644	protein_coding	INSRR	0	0	0	0	0	0.011821
ENSG00000027697	protein_coding	IFNGR1	47.6786	72.7762	74.4747	59.7677	60.8258	57.1739
ENSG00000027847	protein_coding	B4GALT7	27.9743	30.2326	29.0202	13.0613	9.22003	11.2404
ENSG00000027869	protein_coding	SH2D2A	4.44275	4.19343	5.94641	2.16782	0.766326	2.20233
ENSG00000028116	protein_coding	VRK2	25.285	34.9639	40.0907	15.0109	13.8772	14.1531
ENSG00000028137	protein_coding	TNFRSF1B	0	0	0	0.0480463	0.0926422	0
ENSG00000028203	protein_coding	VEZT	25.5782	24.9949	32.1665	27.9132	29.6859	32.0741
ENSG00000028277	protein_coding	POU2F2	2.01302	1.34693	1.67187	3.48151	3.12502	3.59791
ENSG00000028310	protein_coding	BRD9	11.4748	12.3993	12.2736	10.379	10.1713	10.5121
ENSG00000028528	protein_coding	SNX1	26.3254	33.9186	32.8428	29.9286	26.6193	27.7049
ENSG00000028839	protein_coding	TBPL1	8.85905	16.0549	17.0108	4.14262	2.81308	2.57393
ENSG00000029153	protein_coding	ARNTL2	31.0921	43.7467	55.0573	18.768	19.5727	21.329
ENSG00000029363	protein_coding	BCLAF1	27.7773	30.984	39.5826	43.3947	46.4626	46.6518
ENSG00000029364	protein_coding	SLC39A9	16.772	23.7301	25.788	17.1906	16.5734	16.6979
ENSG00000029534	protein_coding	ANK1	0.140951	0.117076	0.127705	0.453923	0.29175	0.176489
ENSG00000029559	protein_coding	IBSP	0	0	0	0	0	0
ENSG00000029639	protein_coding	TFB1M	14.3139	16.0917	18.8384	6.57901	8.47123	8.23879
ENSG00000029725	protein_coding	RABEP1	16.7441	20.7127	21.6491	24.6345	26.3283	28.4663
ENSG00000029993	protein_coding	HMGB3	162.268	133.168	137.919	178.319	186.671	190.769
ENSG00000030066	protein_coding	NUP160	13.309	10.416	12.4603	8.95318	10.4478	8.07073
ENSG00000030110	protein_coding	BAK1	113.978	119.245	119.682	82.143	75.0005	77.6983
ENSG00000030304	protein_coding	MUSK	0	0	0	0	0.0190716	0.006699
ENSG00000030419	protein_coding	IKZF2	2.65245	2.96051	4.2056	4.9977	4.518	4.77091
ENSG00000030582	protein_coding	GRN	466.975	460.096	440.961	474.659	325.719	342.251
ENSG00000031003	protein_coding	FAM13B	2.30989	5.87968	6.7173	3.2795	3.90719	3.6748
ENSG00000031081	protein_coding	ARHGAP31	1.67759	1.39343	1.17673	1.82022	1.7362	1.70493
ENSG00000031691	protein_coding	CENPQ	9.03258	10.6489	12.5397	3.54488	4.42277	2.61272
ENSG00000031698	protein_coding	SARS1	137.067	135.088	143.532	153.317	142.447	150.408
ENSG00000031823	protein_coding	RANBP3	19.9642	22.5818	21.1131	14.2875	11.1183	13.2847
ENSG00000032219	protein_coding	ARID4A	3.47313	3.62019	5.18289	8.30956	8.05818	7.69915
ENSG00000032389	protein_coding	EIPR1	15.3722	16.7813	17.2305	6.75785	5.6061	7.21667
ENSG00000032444	protein_coding	PNPLA6	35.9312	39.4801	39.5399	21.0827	12.0783	13.3018
ENSG00000032742	protein_coding	IFT88	3.07141	4.41283	5.15192	2.25748	2.29097	1.94135
ENSG00000033011	protein_coding	ALG1	16.4897	23.9691	22.0064	7.37558	8.14852	7.15546
ENSG00000033030	protein_coding	ZCCHC8	8.06091	7.29581	6.62344	4.4957	4.12331	4.19003
ENSG00000033050	protein_coding	ABCF2	58.1575	70.8311	67.8199	25.9828	23.9675	25.2558
ENSG00000033100	protein_coding	CHPF2	77.4494	75.9544	80.8282	33.4116	21.6827	22.6436
ENSG00000033122	protein_coding	LRRC7	0	0	0.015539	0.0245478	0.0473328	0.0332514
ENSG00000033170	protein_coding	FUT8	4.21765	5.91928	5.23783	4.47552	4.76637	5.17239
ENSG00000033178	protein_coding	UBA6	17.2977	25.7069	31.1229	11.2335	9.35753	10.6634
ENSG00000033327	protein_coding	GAB2	2.17139	1.86578	2.34046	8.09132	7.6458	7.70296
ENSG00000033627	protein_coding	ATP6V0A1	16.8554	11.9618	13.9499	19.5023	19.2813	20.2167
ENSG00000033800	protein_coding	PIAS1	8.85012	8.13308	8.381	10.3427	11.5628	12.5608
ENSG00000033867	protein_coding	SLC4A7	11.1311	15.3364	20.5525	8.77769	10.3188	8.77039
ENSG00000034053	protein_coding	APBA2	8.7144	11.7776	11.4418	6.02508	5.12086	5.54827
ENSG00000034152	protein_coding	MAP2K3	51.6016	67.6402	64.4674	32.4089	22.8544	27.1931
ENSG00000034239	protein_coding	EFCAB1	0	0.289493	0.19736	0.187069	0.0601172	0.0950232
ENSG00000034510	protein_coding	TMSB10	22627.4	21023	18345.6	14187.6	14605.9	16066.6
ENSG00000034533	protein_coding	ASTE1	3.25655	2.82789	4.5599	1.90682	2.60434	2.86989
ENSG00000034677	protein_coding	RNF19A	14.1297	21.9606	21.7161	20.4721	21.6808	22.321
ENSG00000034693	protein_coding	PEX3	17.7459	29.6289	31.6693	9.10801	11.1308	9.81773
ENSG00000034713	protein_coding	GABARAPL2	61.6827	68.4529	69.6289	27.4389	28.256	29.8974
ENSG00000034971	protein_coding	MYOC	0	0	0	0	0	0
ENSG00000035115	protein_coding	SH3YL1	6.51646	9.57628	9.72319	5.49514	5.54935	5.16847
ENSG00000035141	protein_coding	FAM136A	44.8761	53.2498	65.6056	22.4105	23.0802	22.2095
ENSG00000035403	protein_coding	VCL	69.147	52.7539	63.3162	50.212	49.0746	53.0968
ENSG00000035499	protein_coding	DEPDC1B	10.9293	6.31038	6.33989	2.76618	2.71284	3.52085
ENSG00000035664	protein_coding	DAPK2	0.149069	0.0619095	0.0675303	0.400056	0.218559	0.171601
ENSG00000035681	protein_coding	NSMAF	11.8393	14.2728	14.0044	12.1503	15.855	12.5828
ENSG00000035687	protein_coding	ADSS2	38.1825	54.2461	65.5157	17.5663	16.1219	13.38
ENSG00000035720	protein_coding	STAP1	0.260011	0	0	0	0	0.0630133
ENSG00000035862	protein_coding	TIMP2	21.4331	20.2712	19.6638	15.6287	16.0306	16.9688
ENSG00000035928	protein_coding	RFC1	16.3079	15.2388	16.0751	22.8553	25.8634	25.7991
ENSG00000036054	protein_coding	TBC1D23	15.877	25.2358	31.9668	13.677	12.3069	13.2178
ENSG00000036257	protein_coding	CUL3	17.9014	18.8612	21.892	11.3597	11.6059	10.9421
ENSG00000036448	protein_coding	MYOM2	0.79083	1.01517	0.781652	1.38918	1.19048	1.16736
ENSG00000036473	protein_coding	OTC	0	0	0	0	0	0
ENSG00000036530	protein_coding	CYP46A1	0	0	0.0245571	0.0775888	0.0187007	0
ENSG00000036549	protein_coding	AC118549.1	7.71509	9.82292	10.8678	8.52381	9.84964	9.41012
ENSG00000036565	protein_coding	SLC18A1	0	0	0	0	0	0
ENSG00000036672	protein_coding	USP2	1.45803	1.5837	1.87991	1.12371	0.812519	1.18237
ENSG00000036828	protein_coding	CASR	0.0422558	0	0	0	0.0145774	0
ENSG00000037042	protein_coding	TUBG2	14.1668	14.4827	12.7533	15.6627	13.7219	14.2174
ENSG00000037241	protein_coding	RPL26L1	105.466	131.04	123.985	58.9469	54.5751	57.6144
ENSG00000037280	protein_coding	FLT4	0.057307	0	0.0259609	0	0	0.0138883
ENSG00000037474	protein_coding	NSUN2	64.8612	89.7659	91.9891	40.3192	39.7614	39.1189
ENSG00000037637	protein_coding	FBXO42	8.27732	7.67038	8.54534	4.61403	5.08939	4.89217
ENSG00000037749	protein_coding	MFAP3	4.16498	8.16226	8.6085	6.45038	6.19632	6.37957
ENSG00000037757	protein_coding	MRI1	35.2726	41.4549	35.6709	16.3922	12.8752	14.4363
ENSG00000037897	protein_coding	METTL1	20.8436	20.7757	17.5866	11.2808	8.26918	10.4501
ENSG00000037965	protein_coding	HOXC8	0	0	0	0	0.0724043	0
ENSG00000038002	protein_coding	AGA	12.6577	15.2044	16.7613	11.2186	12.4953	11.1376
ENSG00000038210	protein_coding	PI4K2B	14.1791	21.6109	31.9296	4.23626	4.46407	3.85331
ENSG00000038219	protein_coding	BOD1L1	12.6644	9.16454	10.663	16.1355	17.52	16.6016
ENSG00000038274	protein_coding	MAT2B	23.9069	37.9098	38.2637	12.5844	11.2123	12.0784
ENSG00000038295	protein_coding	TLL1	0.187766	0.259936	0.311889	0.11198	0.0215917	0.0606731
ENSG00000038358	protein_coding	EDC4	30.9822	29.0283	31.4767	19.1275	14.5074	14.7467
ENSG00000038382	protein_coding	TRIO	16.1046	11.4894	15.4276	20.6623	19.4696	21.3112
ENSG00000038427	protein_coding	VCAN	19.4576	12.7745	14.7327	49.0341	47.3092	43.5831
ENSG00000038532	protein_coding	CLEC16A	6.15721	4.50864	5.90892	6.43571	5.72949	5.81169
ENSG00000038945	protein_coding	MSR1	0	0	0	0	0.0224016	0
ENSG00000039068	protein_coding	CDH1	276.706	227.352	269.531	281.662	294.832	303.721
ENSG00000039123	protein_coding	MTREX	24.8565	38.7698	43.4122	29.0853	32.7007	32.3279
ENSG00000039139	protein_coding	DNAH5	0.30791	0.460359	0.460309	1.1128	1.18969	1.35438
ENSG00000039319	protein_coding	ZFYVE16	3.76613	4.4067	5.80078	3.48038	3.3893	3.50007
ENSG00000039523	protein_coding	RIPOR1	32.3412	26.9883	29.8143	56.8916	53.0803	53.1566
ENSG00000039537	protein_coding	C6	0	0	0	0	0	0
ENSG00000039560	protein_coding	RAI14	29.2418	30.0135	35.2545	52.964	56.2792	53.5314
ENSG00000039600	protein_coding	SOX30	0	0	0.0658658	0.26013	0.300948	0.140945
ENSG00000039650	protein_coding	PNKP	23.7736	20.1176	20.4272	10.8232	9.08697	9.64306
ENSG00000039987	protein_coding	BEST2	0	0.159243	0	0	0	0
ENSG00000040199	protein_coding	PHLPP2	2.84237	2.22601	2.66724	2.2521	2.49341	2.49952
ENSG00000040275	protein_coding	SPDL1	20.7162	21.9723	22.4752	6.19635	7.25659	7.22186
ENSG00000040341	protein_coding	STAU2	6.45137	6.58075	7.76787	8.68715	10.1518	9.66889
ENSG00000040487	protein_coding	SLC66A1	26.2517	21.0208	22.5015	10.0694	7.16684	7.66652
ENSG00000040531	protein_coding	CTNS	17.2188	18.7795	18.3139	12.2156	11.1054	11.2125
ENSG00000040608	protein_coding	RTN4R	12.0086	9.30057	10.145	1.56782	0.559824	1.16017
ENSG00000040633	protein_coding	PHF23	74.4309	79.091	79.8813	72.2622	73.2533	70.4886
ENSG00000040731	protein_coding	CDH10	0.415804	0.575623	0.188365	1.48786	1.62569	1.10847
ENSG00000040933	protein_coding	INPP4A	6.19339	3.77038	5.38485	4.83151	4.65803	5.18344
ENSG00000041353	protein_coding	RAB27B	6.52361	16.3736	20.4943	9.97161	9.36894	9.55466
ENSG00000041357	protein_coding	PSMA4	64.6976	81.2108	79.4824	41.0585	40.9604	37.7395
ENSG00000041515	protein_coding	MYO16	0.230164	0.0477945	0.130334	0.123538	0.099252	0.0836698
ENSG00000041802	protein_coding	LSG1	26.0984	33.7893	37.0006	19.6226	19.3919	20.4471
ENSG00000041880	protein_coding	PARP3	8.48934	8.77826	7.29916	8.98915	9.08476	8.83833
ENSG00000041982	protein_coding	TNC	60.3643	33.7907	40.697	52.597	52.7236	44.4105
ENSG00000041988	protein_coding	THAP3	7.97299	9.93374	6.77227	4.45773	3.1373	3.39652
ENSG00000042062	protein_coding	RIPOR3	0.252672	0	0.267083	0.12055	0.174333	0.173498
ENSG00000042088	protein_coding	TDP1	12.3906	10.495	12.6665	7.14641	7.59285	7.85284
ENSG00000042286	protein_coding	AIFM2	4.14914	3.20017	4.65429	2.7926	2.11296	2.41808
ENSG00000042304	protein_coding	C2orf83	0	0	0	0	0	0
ENSG00000042317	protein_coding	SPATA7	3.02656	2.63654	3.17688	2.24521	2.0882	2.22728
ENSG00000042429	protein_coding	MED17	4.82543	9.28455	9.35272	3.13642	2.97112	3.15304
ENSG00000042445	protein_coding	RETSAT	69.4082	73.4694	65.7804	61.1489	59.7744	57.2338
ENSG00000042493	protein_coding	CAPG	286.879	273.821	265.526	202.98	166.464	185.73
ENSG00000042753	protein_coding	AP2S1	274.48	323.683	294	73.7154	67.6794	79.3259
ENSG00000042781	protein_coding	USH2A	0	0	0	0	0.0254448	0
ENSG00000042813	protein_coding	ZPBP	0	0	0	0	0	0
ENSG00000042832	protein_coding	TG	0.136709	0.378509	0.185793	0.277203	0.408734	0.3534
ENSG00000042980	protein_coding	ADAM28	2.93981	3.34625	2.76221	9.17529	10.1042	8.42418
ENSG00000043039	protein_coding	BARX2	12.7091	17.1822	14.6385	5.27334	4.47764	5.43919
ENSG00000043093	protein_coding	DCUN1D1	8.61041	15.3691	17.2624	9.24311	9.75388	10.774
ENSG00000043143	protein_coding	JADE2	6.06046	3.88209	5.44442	5.10907	4.62441	4.79831
ENSG00000043355	protein_coding	ZIC2	0.154189	0	0	0	0	0
ENSG00000043462	protein_coding	LCP2	0	0	0	0	0	0
ENSG00000043514	protein_coding	TRIT1	8.77434	12.9638	12.7338	6.94623	7.554	7.38612
ENSG00000043591	protein_coding	ADRB1	0	0.13865	0.0756189	0	0	0.0202269
ENSG00000044012	protein_coding	GUCA2B	0	0	0	0	0	0
ENSG00000044090	protein_coding	CUL7	14.8834	15.5393	14.6148	15.7687	13.9117	13.4808
ENSG00000044115	protein_coding	CTNNA1	189.412	183.765	198.445	154.733	160.89	159.319
ENSG00000044446	protein_coding	PHKA2	7.89381	7.34551	7.36712	7.53939	6.4292	7.00494
ENSG00000044459	protein_coding	CNTLN	0.871145	0.64742	0.872365	0.836719	0.648504	0.772257
ENSG00000044524	protein_coding	EPHA3	0	0	0	0.027599	0.13304	0.0560767
ENSG00000044574	protein_coding	HSPA5	1353.01	1228.39	1409.78	670.8	777.53	699.789
ENSG00000046604	protein_coding	DSG2	211.255	165.245	204.343	159.399	157.721	161.976
ENSG00000046647	protein_coding	GEMIN8	25.7408	30.072	31.475	7.63817	7.07513	7.86119
ENSG00000046651	protein_coding	OFD1	19.3073	22.2238	26.2394	17.71	18.8998	17.5525
ENSG00000046653	protein_coding	GPM6B	0.0879628	0.0730633	0.23909	0.220328	0.121381	0.202518
ENSG00000046774	protein_coding	MAGEC2	0	0	0	0	0	0
ENSG00000046889	protein_coding	PREX2	0	0	0.0189421	0	0	0
ENSG00000047056	protein_coding	WDR37	11.9152	13.6418	16.5215	8.06623	7.91546	8.07756
ENSG00000047188	protein_coding	YTHDC2	9.90619	12.1279	15.3346	7.69418	7.36932	7.40136
ENSG00000047230	protein_coding	CTPS2	12.1065	10.8177	12.2984	10.2722	12.7826	13.2919
ENSG00000047249	protein_coding	ATP6V1H	38.9605	59.8518	62.2691	15.3992	14.4691	14.1871
ENSG00000047315	protein_coding	POLR2B	55.8001	74.2434	86.3673	48.6228	54.0659	55.3444
ENSG00000047346	protein_coding	FAM214A	5.36587	10.0711	10.9153	4.6709	4.1294	4.15131
ENSG00000047365	protein_coding	ARAP2	5.06179	4.88254	5.80663	4.67418	4.7035	4.07587
ENSG00000047410	protein_coding	TPR	30.4779	22.7567	27.2231	30.2776	31.897	31.2026
ENSG00000047457	protein_coding	CP	0	0	0	2.6694	3.36541	2.06868
ENSG00000047578	protein_coding	KIAA0556	7.36242	5.90002	7.32823	11.2243	8.92534	10.3412
ENSG00000047579	protein_coding	DTNBP1	6.31608	6.7649	7.52968	4.63908	3.84177	4.89419
ENSG00000047597	protein_coding	XK	0.490221	0.162875	0.222077	0.175414	0.169116	0.225729
ENSG00000047617	protein_coding	ANO2	0	0.0673631	0.0734791	0.0580396	0	0.0294817
ENSG00000047621	protein_coding	C12orf4	11.4169	13.8402	18.4516	7.50808	7.6288	6.94211
ENSG00000047634	protein_coding	SCML1	3.50676	3.98591	4.51501	1.35388	1.20976	1.3307
ENSG00000047644	protein_coding	WWC3	13.4771	8.70669	9.33566	9.21118	7.30606	8.7616
ENSG00000047648	protein_coding	ARHGAP6	0	0	0.0258412	0.0612343	0.118071	0.110594
ENSG00000047662	protein_coding	FAM184B	0	0.0625994	0	0	0	0
ENSG00000047849	protein_coding	MAP4	94.9179	77.4305	82.2306	95.2479	94.0061	98.7921
ENSG00000047932	protein_coding	GOPC	24.8818	42.6091	54.9687	33.3778	34.9397	31.5449
ENSG00000047936	protein_coding	ROS1	0.51658	0.804525	1.11159	0.993548	1.15836	1.02501
ENSG00000048028	protein_coding	USP28	9.13621	6.55722	8.15712	7.26837	7.06859	6.85741
ENSG00000048052	protein_coding	HDAC9	0.9647	2.07836	2.73139	4.25022	4.30561	3.85759
ENSG00000048140	protein_coding	TSPAN17	41.8276	42.6608	46.0493	32.5794	29.1948	28.7486
ENSG00000048162	protein_coding	NOP16	65.2269	86.8624	78.2881	31.1411	33.7528	35.4813
ENSG00000048342	protein_coding	CC2D2A	2.65425	3.57156	3.10223	1.80455	2.58216	1.80755
ENSG00000048392	protein_coding	RRM2B	7.81012	15.0847	16.1133	9.83185	11.0694	11.2996
ENSG00000048405	protein_coding	ZNF800	5.42921	7.63722	10.2744	3.44676	3.11153	3.4804
ENSG00000048462	protein_coding	TNFRSF17	0	0	0	0	0	0
ENSG00000048471	protein_coding	SNX29	5.52222	4.25123	3.7423	4.72312	4.49158	4.28148
ENSG00000048540	protein_coding	LMO3	0.202872	0	0.045952	0.072593	0.0349932	0.0122914
ENSG00000048544	protein_coding	MRPS10	74.6428	109.151	118.076	33.6242	30.6669	35.7108
ENSG00000048545	protein_coding	GUCA1A	0	0	0	0	0.0891498	0
ENSG00000048649	protein_coding	RSF1	7.38039	6.63891	7.27086	12.0052	11.9743	12.536
ENSG00000048707	protein_coding	VPS13D	8.13389	7.22279	7.72363	14.2467	14.0806	13.9733
ENSG00000048740	protein_coding	CELF2	4.71331	4.10686	5.17053	6.16748	6.50396	6.58481
ENSG00000048828	protein_coding	FAM120A	87.7906	79.6076	97.3963	59.6212	47.8198	55.0307
ENSG00000048991	protein_coding	R3HDM1	15.415	12.9106	15.3631	16.157	15.0229	17.963
ENSG00000049089	protein_coding	COL9A2	0.361054	0.0999659	0.218084	0.8613	0.705817	1.03543
ENSG00000049130	protein_coding	KITLG	6.78555	7.94499	8.81447	6.20177	6.37393	5.10182
ENSG00000049167	protein_coding	ERCC8	3.44519	6.26466	5.9898	2.63216	2.60189	2.88843
ENSG00000049192	protein_coding	ADAMTS6	1.36223	1.62344	2.65625	0.826531	0.837717	0.818157
ENSG00000049239	protein_coding	H6PD	8.54449	10.2163	9.66461	7.36124	6.6651	6.81895
ENSG00000049245	protein_coding	VAMP3	137.354	175.912	197.433	90.9255	95.4726	92.6203
ENSG00000049246	protein_coding	PER3	2.69331	1.56077	1.33361	2.19643	1.81505	1.74564
ENSG00000049247	protein_coding	UTS2	0	0	0	0	0	0
ENSG00000049249	protein_coding	TNFRSF9	0.0801266	0.0665545	0	0.172029	0.13821	0.13593
ENSG00000049283	protein_coding	EPN3	33.5709	30.6917	35.2644	9.23114	7.11197	6.86634
ENSG00000049323	protein_coding	LTBP1	23.5415	26.2057	27.9595	17.6875	18.0765	18.3371
ENSG00000049449	protein_coding	RCN1	48.6122	64.4427	69.6545	34.5565	31.8932	32.3586
ENSG00000049540	protein_coding	ELN	0	0	0	0.0277467	0	0
ENSG00000049541	protein_coding	RFC2	42.9044	33.3502	28.0631	13.5462	14.3262	14.5125
ENSG00000049618	protein_coding	ARID1B	2.65693	2.85764	2.62844	2.96187	2.42856	2.76136
ENSG00000049656	protein_coding	CLPTM1L	53.6793	59.3849	61.3728	25.5828	22.3394	21.8133
ENSG00000049759	protein_coding	NEDD4L	11.7047	9.57846	10.9705	21.519	22.3376	21.6135
ENSG00000049768	protein_coding	FOXP3	0.328763	0.136538	0.0744672	0.17646	0.28354	0.099594
ENSG00000049769	protein_coding	PPP1R3F	0.579353	1.15493	0.787366	0.456078	0.399728	0.491419
ENSG00000049860	protein_coding	HEXB	57.0502	74.6091	74.4177	26.893	28.405	25.0781
ENSG00000049883	protein_coding	PTCD2	2.80543	3.40841	3.79374	2.56209	2.71566	2.42529
ENSG00000050030	protein_coding	NEXMIF	0.04274	0.0355006	0	0	0	0
ENSG00000050130	protein_coding	JKAMP	27.8713	35.0646	43.1612	11.3919	8.28741	9.12857
ENSG00000050165	protein_coding	DKK3	38.2646	45.772	46.1995	33.3498	32.6499	29.6192
ENSG00000050327	protein_coding	ARHGEF5	35.3998	29.0416	29.9008	46.6433	42.2614	43.4026
ENSG00000050344	protein_coding	NFE2L3	7.30919	10.0859	11.4823	10.0399	11.5908	10.2568
ENSG00000050393	protein_coding	MCUR1	13.4002	16.4174	16.3903	6.653	5.95183	6.55593
ENSG00000050405	protein_coding	LIMA1	200.921	213.313	227.478	167.525	191.928	194.343
ENSG00000050426	protein_coding	LETMD1	10.1456	17.6204	15.9819	7.05448	7.23868	8.20058
ENSG00000050438	protein_coding	SLC4A8	0.169849	0.305671	0.346248	0.0202588	0.0781255	0.0583136
ENSG00000050555	protein_coding	LAMC3	0	0	0	0	0	0.008194
ENSG00000050628	protein_coding	PTGER3	0	0	0.0238067	0	0.0181292	0.0191037
ENSG00000050730	protein_coding	TNIP3	0.135311	0.112392	0.0612979	0.145254	0.606832	0.278736
ENSG00000050748	protein_coding	MAPK9	11.9527	11.6691	12.4462	5.99995	6.50758	6.8574
ENSG00000050767	protein_coding	COL23A1	0.140755	0.350741	0.0637641	0.352562	0.145672	0.0511677
ENSG00000050820	protein_coding	BCAR1	35.9547	37.9262	37.0227	14.7796	9.72123	9.98319
ENSG00000051009	protein_coding	FAM160A2	14.5672	13.1674	16.0612	9.81183	10.1246	8.68308
ENSG00000051108	protein_coding	HERPUD1	46.9	45.6983	55.068	26.3565	27.7264	27.8203
ENSG00000051128	protein_coding	HOMER3	106.882	136.676	132.766	62.6988	45.0032	50.1348
ENSG00000051180	protein_coding	RAD51	14.3105	4.50868	6.33382	2.35433	2.49677	2.91003
ENSG00000051341	protein_coding	POLQ	2.64941	1.39225	1.32269	1.04477	0.91399	0.792774
ENSG00000051382	protein_coding	PIK3CB	11.4512	11.0162	13.6576	6.22734	7.633	6.93011
ENSG00000051523	protein_coding	CYBA	92.1621	61.6556	58.5641	37.1631	18.6675	19.482
ENSG00000051596	protein_coding	THOC3	70.0762	74.436	75.2709	73.9638	76.6802	76.4941
ENSG00000051620	protein_coding	HEBP2	42.4368	53.9313	51.6575	15.1675	15.0962	16.5728
ENSG00000051825	protein_coding	MPHOSPH9	2.01849	1.34945	2.07414	1.8321	2.15694	1.83144
ENSG00000052126	protein_coding	PLEKHA5	9.49284	8.15334	8.71059	9.71339	9.72693	10.0736
ENSG00000052344	protein_coding	PRSS8	145.62	142.199	148.852	160.469	117.413	134.654
ENSG00000052723	protein_coding	SIKE1	16.0946	20.7318	25.1874	6.34423	6.38365	6.71638
ENSG00000052749	protein_coding	RRP12	17.8432	22.3795	22.3905	7.91711	5.4784	5.80893
ENSG00000052795	protein_coding	FNIP2	3.97288	3.56854	4.0181	3.19034	2.91642	2.94444
ENSG00000052802	protein_coding	MSMO1	295.44	426.675	487.411	98.3333	88.1142	110.998
ENSG00000052841	protein_coding	TTC17	13.8766	11.0785	11.2502	14.848	16.3754	15.634
ENSG00000052850	protein_coding	ALX4	0	0.0735737	0	0.0950859	0	0.0214665
ENSG00000053108	protein_coding	FSTL4	0.151179	0	0.0342431	0.108192	0.130384	0.036638
ENSG00000053254	protein_coding	FOXN3	4.96568	3.51353	3.97833	5.9393	5.90052	5.72185
ENSG00000053328	protein_coding	METTL24	0	0	0	0	0	0
ENSG00000053371	protein_coding	AKR7A2	58.1052	68.6094	66.3224	30.5759	30.6571	33.5821
ENSG00000053372	protein_coding	MRTO4	100.821	118.362	102.136	37.923	39.2315	43.3124
ENSG00000053438	protein_coding	NNAT	0.763403	0.951143	2.93958	4.09749	4.74044	3.93145
ENSG00000053501	protein_coding	USE1	10.6423	12.1328	12.1	5.07745	4.39122	3.56528
ENSG00000053524	protein_coding	MCF2L2	0.221973	0.20486	0.22346	0.123554	0.221219	0.17035
ENSG00000053702	protein_coding	NRIP2	0.180271	0.299471	1.30664	0.387034	0.559705	0.699013
ENSG00000053747	protein_coding	LAMA3	423.748	300.099	354.463	446.39	459.989	458.99
ENSG00000053770	protein_coding	AP5M1	4.44197	8.38246	9.93783	3.06738	2.50021	3.06427
ENSG00000053900	protein_coding	ANAPC4	5.82148	12.9882	11.4995	3.00352	3.2693	3.02672
ENSG00000053918	protein_coding	KCNQ1	0.11477	0.0953295	0.103985	0.369609	0.356337	0.305957
ENSG00000054116	protein_coding	TRAPPC3	81.6943	87.8075	90.1761	38.7021	37.6101	44.8777
ENSG00000054118	protein_coding	THRAP3	108.872	83.2	90.8512	151.291	153.942	161.123
ENSG00000054148	protein_coding	PHPT1	122.415	153.696	120.32	76.5712	62.4228	63.2998
ENSG00000054179	protein_coding	ENTPD2	3.65089	1.91526	1.91505	1.65017	1.45834	1.07106
ENSG00000054219	protein_coding	LY75	0.691354	1.00494	1.25277	1.072	0.576381	0.942462
ENSG00000054267	protein_coding	ARID4B	8.61274	11.0733	11.3315	12.8521	15.2195	14.2946
ENSG00000054277	protein_coding	OPN3	26.0179	32.2467	32.706	16.6214	17.7633	16.7209
ENSG00000054282	protein_coding	SDCCAG8	15.6351	15.6791	16.5412	10.8482	12.8595	13.8742
ENSG00000054356	protein_coding	PTPRN	0	0	0	0.0220611	0	0
ENSG00000054392	protein_coding	HHAT	0.839743	1.14137	1.0375	1.91216	1.92251	2.07211
ENSG00000054523	protein_coding	KIF1B	10.9357	9.05964	9.93404	12.3335	12.7695	13.1056
ENSG00000054598	protein_coding	FOXC1	19.359	21.0519	22.5017	25.43	24.6926	25.3563
ENSG00000054611	protein_coding	TBC1D22A	20.234	17.6787	18.3758	16.2906	13.1045	14.0287
ENSG00000054654	protein_coding	SYNE2	5.93815	4.85425	5.45822	6.0269	5.84292	6.01841
ENSG00000054690	protein_coding	PLEKHH1	1.92081	1.40089	2.05866	1.89431	1.84246	1.97556
ENSG00000054793	protein_coding	ATP9A	11.3106	6.94171	7.82814	15.6943	16.9517	17.1091
ENSG00000054796	protein_coding	SPO11	0	0	0	0	0	0
ENSG00000054803	protein_coding	CBLN4	0	0	0	0	0	0
ENSG00000054938	protein_coding	CHRDL2	0	0	0	0	0	0.0196075
ENSG00000054965	protein_coding	FAM168A	14.4074	9.5095	11.4801	14.2693	13.8678	14.9329
ENSG00000054967	protein_coding	RELT	6.80529	5.72069	5.60864	3.72602	2.60225	2.43414
ENSG00000054983	protein_coding	GALC	5.49755	6.94337	6.72086	4.95835	4.36464	4.62663
ENSG00000055044	protein_coding	NOP58	105.206	89.3162	88.3004	89.2071	93.5941	85.9521
ENSG00000055070	protein_coding	SZRD1	98.3111	77.0384	79.6712	76.3666	58.6412	65.6823
ENSG00000055118	protein_coding	KCNH2	0	0	0	0	0	0.0105891
ENSG00000055130	protein_coding	CUL1	65.365	54.8007	61.1598	42.7129	41.0949	42.3713
ENSG00000055147	protein_coding	FAM114A2	8.63226	12.2085	13.5636	10.9362	12.663	12.4202
ENSG00000055163	protein_coding	CYFIP2	0.386574	0.280958	0.262685	3.33713	3.83409	3.73571
ENSG00000055208	protein_coding	TAB2	29.7242	36.0024	37.8741	37.3643	35.0475	33.9317
ENSG00000055211	protein_coding	GINM1	57.2664	65.5443	70.1674	22.6697	19.7557	19.2877
ENSG00000055332	protein_coding	EIF2AK2	10.9448	12.4216	14.7035	20.9659	21.5964	23.5691
ENSG00000055483	protein_coding	USP36	14.5016	13.8247	14.4826	15.9013	13.6817	14.4638
ENSG00000055609	protein_coding	KMT2C	5.87633	3.62408	5.4498	11.3258	11.8413	11.9339
ENSG00000055732	protein_coding	MCOLN3	4.13544	6.10661	6.73042	4.76816	5.36311	4.74198
ENSG00000055813	protein_coding	CCDC85A	0	0	0	0	0	0.0448246
ENSG00000055917	protein_coding	PUM2	24.0628	26.3272	33.4598	18.9375	21.3924	20.3665
ENSG00000055950	protein_coding	MRPL43	41.1731	55.0723	56.9851	26.0619	16.3589	19.1823
ENSG00000055955	protein_coding	ITIH4	0.435528	0.0904392	0.345276	0.116883	0.525867	0.290261
ENSG00000055957	protein_coding	ITIH1	0	0	0	0	0	0
ENSG00000056050	protein_coding	HPF1	19.9773	33.7796	33.6143	5.87192	7.99935	6.91639
ENSG00000056097	protein_coding	ZFR	27.2708	36.7154	46.1241	46.5124	41.8958	46.2541
ENSG00000056277	protein_coding	ZNF280C	2.29687	1.90782	2.47742	2.3091	2.60351	2.45189
ENSG00000056291	protein_coding	NPFFR2	0.215041	0.357233	0.487083	0.153895	0	0.0781722
ENSG00000056487	protein_coding	PHF21B	0	0	0	0.0302179	0.0582657	0.010233
ENSG00000056558	protein_coding	TRAF1	2.26667	1.60033	1.43757	1.78437	1.52481	1.26345
ENSG00000056586	protein_coding	RC3H2	11.3626	11.6608	14.5082	13.265	12.2136	12.7319
ENSG00000056736	protein_coding	IL17RB	0.666598	0.830532	1.58539	1.07337	0.632396	0.66639
ENSG00000056972	protein_coding	TRAF3IP2	34.8027	34.368	35.2986	17.4116	17.1644	18.2276
ENSG00000056998	protein_coding	GYG2	0	0.116365	0.0634647	0.0501295	0.096659	0
ENSG00000057019	protein_coding	DCBLD2	87.3351	86.0643	106.835	58.8971	59.9006	68.7008
ENSG00000057149	protein_coding	SERPINB3	35.0669	33.5703	26.6559	26.9035	28.9106	17.2129
ENSG00000057252	protein_coding	SOAT1	13.1075	14.0753	18.2401	6.81506	5.39618	6.16011
ENSG00000057294	protein_coding	PKP2	39.2543	32.0669	39.6768	26.5461	25.096	28.5222
ENSG00000057468	protein_coding	MSH4	0	0	0.140554	0	0.160551	0.056394
ENSG00000057593	protein_coding	F7	0	0	0	0	0	0
ENSG00000057608	protein_coding	GDI2	173.755	219.282	237.255	165.628	167.81	165.848
ENSG00000057657	protein_coding	PRDM1	4.35886	4.11993	5.14084	5.8355	5.65189	6.27444
ENSG00000057663	protein_coding	ATG5	18.6586	24.7375	28.6495	10.0148	9.9028	9.7612
ENSG00000057704	protein_coding	TMCC3	18.3843	15.5938	20.6091	9.67246	10.1582	11.45
ENSG00000057757	protein_coding	PITHD1	43.4212	58.7533	56.579	24.8931	23.2744	23.0546
ENSG00000057935	protein_coding	MTA3	10.932	9.87678	10.4911	10.723	11.5951	12.0266
ENSG00000058056	protein_coding	USP13	1.74174	1.70506	1.71896	1.26874	1.45924	1.19095
ENSG00000058063	protein_coding	ATP11B	17.1726	18.8044	21.112	12.7441	12.0007	13.0205
ENSG00000058085	protein_coding	LAMC2	2591.93	1858.51	2169.37	2270.81	2257.67	2404.54
ENSG00000058091	protein_coding	CDK14	5.13282	6.24498	7.79447	8.01922	8.13031	7.70887
ENSG00000058262	protein_coding	SEC61A1	235.164	214.038	242.138	152.648	142.905	139.936
ENSG00000058272	protein_coding	PPP1R12A	11.8867	13.3538	16.9488	14.5044	15.7241	14.1446
ENSG00000058335	protein_coding	RASGRF1	0.0584223	0	0.0529323	0.0418102	0.0403089	0.0637136
ENSG00000058404	protein_coding	CAMK2B	0	0.103286	0.112664	0.0222477	0.0428977	0.0226018
ENSG00000058453	protein_coding	CROCC	5.48721	7.73871	8.07881	2.59751	1.93241	1.79387
ENSG00000058600	protein_coding	POLR3E	11.4975	11.6377	14.4143	7.46283	6.47537	7.25114
ENSG00000058668	protein_coding	ATP2B4	40.2861	30.1681	36.4058	53.9832	55.4833	62.1397
ENSG00000058673	protein_coding	ZC3H11A	27.9445	27.7546	30.041	23.9415	24.0801	24.169
ENSG00000058729	protein_coding	RIOK2	13.8627	19.8818	21.4357	7.04382	9.34147	9.47407
ENSG00000058799	protein_coding	YIPF1	53.0702	45.7366	54.8554	40.4762	45.2115	38.8864
ENSG00000058804	protein_coding	NDC1	19.9903	22.2283	26.9243	11.8833	10.9005	11.5516
ENSG00000058866	protein_coding	DGKG	0.092443	0.191962	0.0837561	0.0661572	0.0797272	0.12882
ENSG00000059122	protein_coding	FLYWCH1	21.1493	24.5737	23.5565	13.9497	8.31458	9.76181
ENSG00000059145	protein_coding	UNKL	2.57228	1.91168	2.39189	1.91353	1.09755	1.49285
ENSG00000059377	protein_coding	TBXAS1	0.566252	0.53753	0.329812	0.289458	0.306971	0.205846
ENSG00000059378	protein_coding	PARP12	13.5336	13.5354	15.8904	11.8267	9.97284	10.8659
ENSG00000059573	protein_coding	ALDH18A1	67.6105	77.9044	81.0648	50.1241	52.0953	53.3586
ENSG00000059588	protein_coding	TARBP1	7.46097	9.69998	10.7864	4.85196	5.21489	5.45591
ENSG00000059691	protein_coding	GATB	8.55478	9.79732	8.7491	6.21502	6.27506	6.8375
ENSG00000059728	protein_coding	MXD1	23.0837	27.9312	31.7697	15.0623	13.6672	14.3245
ENSG00000059758	protein_coding	CDK17	7.45194	15.7023	18.4427	7.60656	8.3888	7.32843
ENSG00000059769	protein_coding	DNAJC25	8.37676	15.0484	13.7672	8.71346	11.6264	9.82
ENSG00000059804	protein_coding	SLC2A3	3.09165	2.8456	3.89886	3.91681	2.30606	2.48065
ENSG00000059915	protein_coding	PSD	0.0848438	0.704727	0.576532	0.333953	0.146346	0.164494
ENSG00000060069	protein_coding	CTDP1	14.9824	18.2976	17.6964	6.92783	4.60219	6.08477
ENSG00000060138	protein_coding	YBX3	105.387	120.967	121.447	101.866	95.6914	108.949
ENSG00000060140	protein_coding	STYK1	4.57143	6.24685	6.6804	3.95753	3.71369	4.25283
ENSG00000060237	protein_coding	WNK1	35.7255	25.661	30.9305	50.8566	54.8338	53.7858
ENSG00000060339	protein_coding	CCAR1	52.4947	54.7993	56.7024	43.7694	45.9526	49.1431
ENSG00000060491	protein_coding	OGFR	34.7394	30.0201	36.069	20.5763	13.0637	14.7987
ENSG00000060558	protein_coding	GNA15	111.112	118.004	126.715	65.1437	52.5067	52.6052
ENSG00000060566	protein_coding	CREB3L3	0	0	0	0	0	0.0464271
ENSG00000060642	protein_coding	PIGV	9.44965	8.84574	9.64885	6.06494	7.29602	5.65257
ENSG00000060656	protein_coding	PTPRU	32.1131	28.1241	28.6483	29.2299	21.4496	21.4527
ENSG00000060688	protein_coding	SNRNP40	28.1895	26.992	30.0338	12.2351	13.2815	13.4736
ENSG00000060709	protein_coding	RIMBP2	0	0	0	0	0	0.0190998
ENSG00000060718	protein_coding	COL11A1	0.0558004	0.787928	0.278062	0.0199669	0	0.0270463
ENSG00000060749	protein_coding	QSER1	7.12121	7.38408	8.70812	7.0116	7.19337	6.76226
ENSG00000060762	protein_coding	MPC1	27.5625	38.9741	44.2963	11.8586	10.98	10.616
ENSG00000060971	protein_coding	ACAA1	39.2633	54.315	55.0421	22.8112	19.4063	20.1726
ENSG00000060982	protein_coding	BCAT1	1.99979	3.76508	5.63694	1.16083	1.30312	1.41625
ENSG00000061273	protein_coding	HDAC7	30.5043	23.1305	25.6703	15.3399	13.9077	14.3829
ENSG00000061337	protein_coding	LZTS1	0.0889031	0.147689	0	0.0318119	0.092009	0.0323183
ENSG00000061455	protein_coding	PRDM6	0	0.0913015	0	0.0196662	0.01896	0.026639
ENSG00000061492	protein_coding	WNT8A	0	0	0	0	0	0
ENSG00000061656	protein_coding	SPAG4	4.53701	4.48633	3.71917	2.55116	2.0869	2.87974
ENSG00000061676	protein_coding	NCKAP1	25.2289	30.9656	41.3793	11.2684	10.1488	10.5852
ENSG00000061794	protein_coding	MRPS35	85.423	125.752	142.527	40.5361	35.5443	34.0789
ENSG00000061918	protein_coding	GUCY1B1	4.93388	2.69616	2.94095	2.5553	2.10521	1.82505
ENSG00000061936	protein_coding	SFSWAP	15.6325	11.989	13.7562	11.0623	9.2523	9.31392
ENSG00000061938	protein_coding	TNK2	12.2783	13.4153	14.075	5.99971	3.9321	4.72473
ENSG00000061987	protein_coding	MON2	3.61122	4.34144	5.33831	2.22166	2.28395	2.59481
ENSG00000062038	protein_coding	CDH3	411.185	323.645	315.964	534.16	444.127	436.538
ENSG00000062096	protein_coding	ARSF	0	0	0	0	0	0
ENSG00000062194	protein_coding	GPBP1	16.5384	19.8569	22.1213	14.2197	14.2499	14.2371
ENSG00000062282	protein_coding	DGAT2	1.66869	2.13237	2.32597	0.643033	0.487098	0.482174
ENSG00000062370	protein_coding	ZNF112	1.58196	2.2995	2.14995	3.9153	4.72976	4.10542
ENSG00000062485	protein_coding	CS	93.0399	69.3155	84.0096	61.3948	65.2597	67.6923
ENSG00000062524	protein_coding	LTK	0	0	0.0658281	0	0.0501292	0
ENSG00000062582	protein_coding	MRPS24	53.5107	54.1444	55.0053	39.1307	34.0336	43.479
ENSG00000062598	protein_coding	ELMO2	14.3795	14.8819	16.3724	12.6846	12.4944	13.4642
ENSG00000062650	protein_coding	WAPL	22.1077	22.6907	30.3324	19.928	18.2409	20.1855
ENSG00000062716	protein_coding	VMP1	53.437	70.5744	77.2166	53.7618	61.6359	56.8059
ENSG00000062725	protein_coding	APPBP2	5.02665	8.18002	8.96916	5.67132	5.43229	5.89833
ENSG00000062822	protein_coding	POLD1	20.7683	12.3828	14.718	5.8863	2.6956	3.97421
ENSG00000063015	protein_coding	SEZ6	0	0	0	0	0.0352683	0.0247761
ENSG00000063046	protein_coding	EIF4B	134.042	122.444	143.769	236.483	247.752	240.057
ENSG00000063127	protein_coding	SLC6A16	0.282687	0	0	0.151729	0.0975208	0.154145
ENSG00000063169	protein_coding	BICRA	5.27081	3.92899	3.73469	2.73233	2.21461	1.98975
ENSG00000063176	protein_coding	SPHK2	5.4029	4.97858	5.43059	3.41349	1.83476	2.06637
ENSG00000063177	protein_coding	RPL18	534.112	557.366	488.509	225.616	147.46	181.763
ENSG00000063180	protein_coding	CA11	3.12815	5.41311	4.01511	17.9094	20.5937	18.2576
ENSG00000063241	protein_coding	ISOC2	21.1751	23.4193	21.1142	5.47686	4.20828	3.93248
ENSG00000063244	protein_coding	U2AF2	182.202	181.444	187.866	100.53	80.3772	89.0747
ENSG00000063245	protein_coding	EPN1	25.8594	20.7138	22.464	7.39842	5.04658	5.45046
ENSG00000063322	protein_coding	MED29	33.1669	24.4758	27.536	21.23	19.1457	19.1982
ENSG00000063438	protein_coding	AHRR	0	0	0	0	0	0
ENSG00000063515	protein_coding	GSC2	0	0	0	0	0	0.0595058
ENSG00000063587	protein_coding	ZNF275	3.17557	1.70673	2.93357	2.27261	2.12656	1.54673
ENSG00000063601	protein_coding	MTMR1	13.7883	15.115	14.6715	9.52343	10.9514	10.151
ENSG00000063660	protein_coding	GPC1	127.093	136.963	132.415	87.3083	44.515	49.1605
ENSG00000063761	protein_coding	ADCK1	3.45024	2.4678	3.42994	2.26341	2.04989	2.10202
ENSG00000063854	protein_coding	HAGH	15.7249	14.7211	14.877	9.26402	8.75155	8.41139
ENSG00000063978	protein_coding	RNF4	33.2457	28.2635	30.5721	27.9103	25.9524	26.2973
ENSG00000064012	protein_coding	CASP8	8.89476	11.8676	11.5173	10.4004	11.6458	11.8135
ENSG00000064042	protein_coding	LIMCH1	0.280214	0	0.126941	0.969259	0.708898	0.803596
ENSG00000064102	protein_coding	INTS13	45.1064	59.6428	60.0996	32.6959	34.4396	33.337
ENSG00000064115	protein_coding	TM7SF3	86.8203	123.559	126.468	105.27	114.05	107.047
ENSG00000064195	protein_coding	DLX3	0.93422	0.620783	1.35429	0.267431	0.4512	0.769783
ENSG00000064199	protein_coding	SPA17	5.1654	6.63808	5.29812	6.45168	5.95105	6.04656
ENSG00000064201	protein_coding	TSPAN32	0	0	0	0	0	0
ENSG00000064205	protein_coding	CCN5	0.101843	0	0	0.182211	0.245936	0.185112
ENSG00000064218	protein_coding	DMRT3	0	0	0	0.067304	0	0
ENSG00000064225	protein_coding	ST3GAL6	1.37147	1.67524	2.30244	0.317543	0.473126	0.586541
ENSG00000064270	protein_coding	ATP2C2	6.13922	5.60298	4.63526	6.53609	5.25552	5.51048
ENSG00000064300	protein_coding	NGFR	0.122502	0	0.221981	3.37526	2.74694	2.2563
ENSG00000064309	protein_coding	CDON	0.478567	0.477007	0.390236	0.530857	0.528305	0.574101
ENSG00000064313	protein_coding	TAF2	11.8153	12.0092	15.4941	12.5444	12.3085	13.4129
ENSG00000064393	protein_coding	HIPK2	10.9431	7.71399	9.78241	12.9673	12.4681	13.9449
ENSG00000064419	protein_coding	TNPO3	50.88	45.686	48.5069	38.1205	40.7562	38.8851
ENSG00000064489	protein_coding	BORCS8-MEF2B	3.68167	3.27649	3.57396	5.5519	2.17731	2.48555
ENSG00000064490	protein_coding	RFXANK	54.3154	56.5624	57.199	18.7828	16.1507	16.3804
ENSG00000064545	protein_coding	TMEM161A	26.9024	29.6657	27.4562	9.1285	3.84032	5.37694
ENSG00000064547	protein_coding	LPAR2	11.936	13.5967	13.7497	9.88439	7.8824	8.57473
ENSG00000064601	protein_coding	CTSA	39.2415	41.9486	36.9275	41.2261	39.8653	39.699
ENSG00000064607	protein_coding	SUGP2	36.0033	30.9996	35.1168	33.4399	30.0279	31.7002
ENSG00000064651	protein_coding	SLC12A2	4.19044	5.33963	5.91071	3.54416	2.74338	3.04664
ENSG00000064652	protein_coding	SNX24	16.5005	14.0695	18.2575	9.09162	9.82303	8.7586
ENSG00000064655	protein_coding	EYA2	27.0606	18.4009	19.2458	29.8016	28.925	28.2202
ENSG00000064666	protein_coding	CNN2	338.234	299.117	306.134	160.724	118.462	132.075
ENSG00000064687	protein_coding	ABCA7	8.35684	10.9831	9.87175	10.1254	6.07605	7.54348
ENSG00000064692	protein_coding	SNCAIP	0.0697869	0	0	0.0249716	0.04815	0.008456
ENSG00000064703	protein_coding	DDX20	10.082	15.7679	17.0348	7.63777	8.42888	7.72633
ENSG00000064726	protein_coding	BTBD1	34.4342	51.9182	60.5317	19.1073	17.9047	19.1998
ENSG00000064763	protein_coding	FAR2	2.25	2.56972	2.46327	0.53674	0.420442	1.05649
ENSG00000064787	protein_coding	BCAS1	1.30136	1.90449	1.4598	2.90483	3.44187	2.75584
ENSG00000064835	protein_coding	POU1F1	0	0.269065	0	0	0	0
ENSG00000064886	protein_coding	CHI3L2	0	0.127877	0.278975	0	0.265556	0.503695
ENSG00000064932	protein_coding	SBNO2	26.5536	35.2511	31.6722	19.9643	13.1052	14.4793
ENSG00000064933	protein_coding	PMS1	5.1156	8.88448	9.4383	4.0271	4.26754	4.35042
ENSG00000064961	protein_coding	HMG20B	41.9556	49.4878	47.129	29.3197	16.9693	20.8298
ENSG00000064989	protein_coding	CALCRL	0.624645	0.864735	0.597388	0.273185	0.167603	0.218663
ENSG00000064995	protein_coding	TAF11	43.6124	56.774	63.5461	24.093	21.9081	23.024
ENSG00000064999	protein_coding	ANKS1A	12.7746	10.4124	12.4665	14.5676	11.7587	13.0563
ENSG00000065000	protein_coding	AP3D1	59.4861	59.2433	61.447	59.7687	49.4953	55.7029
ENSG00000065029	protein_coding	ZNF76	8.90098	7.95246	7.38686	5.59384	3.79315	4.19645
ENSG00000065054	protein_coding	SLC9A3R2	39.3879	33.3154	35.3598	12.8034	6.71933	8.95118
ENSG00000065057	protein_coding	NTHL1	15.0306	17.1664	18.9141	3.88435	2.30454	3.94619
ENSG00000065060	protein_coding	UHRF1BP1	4.04473	3.35962	3.64145	4.52515	4.80423	4.65302
ENSG00000065135	protein_coding	GNAI3	32.3641	47.6612	57.3752	17.8428	18.3051	19.5473
ENSG00000065150	protein_coding	IPO5	38.8965	46.7399	52.2199	24.1174	24.2292	25.8243
ENSG00000065154	protein_coding	OAT	187.311	235.179	278.032	185.269	209.041	206.634
ENSG00000065183	protein_coding	WDR3	15.5502	17.5087	20.5296	11.5878	12.5852	13.19
ENSG00000065243	protein_coding	PKN2	12.7243	20.405	25.4562	14.3173	15.1987	16.5416
ENSG00000065268	protein_coding	WDR18	42.399	50.9489	50.0171	10.5507	5.6428	6.25909
ENSG00000065308	protein_coding	TRAM2	14.901	8.66988	11.1854	15.558	17.2841	16.835
ENSG00000065320	protein_coding	NTN1	0.869851	0.459781	0.429878	3.22574	1.93688	1.93559
ENSG00000065325	protein_coding	GLP2R	0	0	0	0.0637356	0.0921705	0.0647501
ENSG00000065328	protein_coding	MCM10	9.76614	3.70831	4.04499	1.99691	2.56694	1.84837
ENSG00000065357	protein_coding	DGKA	52.2955	47.5685	51.1362	46.647	47.5889	49.4775
ENSG00000065361	protein_coding	ERBB3	10.9998	8.34415	7.70341	12.1093	13.6106	14.3762
ENSG00000065371	protein_coding	ROPN1	0.11228	0	0	0	0	0
ENSG00000065413	protein_coding	ANKRD44	0.197755	0.262814	0.197089	0.254743	0.218308	0.220458
ENSG00000065427	protein_coding	KARS1	163.603	171.445	184.41	93.5057	98.8444	105.02
ENSG00000065457	protein_coding	ADAT1	7.57642	4.8842	5.32764	6.75739	7.02189	8.00226
ENSG00000065485	protein_coding	PDIA5	25.0709	28.1802	30.1172	17.5851	17.8142	17.2151
ENSG00000065491	protein_coding	TBC1D22B	18.9022	13.0229	14.6035	16.6209	17.3889	17.4004
ENSG00000065518	protein_coding	NDUFB4	92.6998	128.18	120.963	67.6948	63.4927	61.6987
ENSG00000065526	protein_coding	SPEN	16.8079	9.61102	11.5897	28.5776	25.9523	27.6818
ENSG00000065534	protein_coding	MYLK	0.228845	0.209091	0.311011	0.434001	0.394733	0.288394
ENSG00000065548	protein_coding	ZC3H15	82.6469	118.08	119.232	93.7588	88.0789	91.0869
ENSG00000065559	protein_coding	MAP2K4	19.9038	21.4774	25.6413	13.0996	13.2117	12.7806
ENSG00000065600	protein_coding	PACC1	15.6676	18.5084	17.7441	12.8322	12.4915	12.4247
ENSG00000065609	protein_coding	SNAP91	0	0	0	0	0	0
ENSG00000065613	protein_coding	SLK	54.0007	60.81	69.9594	46.0794	47.1232	49.9747
ENSG00000065615	protein_coding	CYB5R4	2.84723	5.91239	7.28518	3.01871	3.20135	2.61314
ENSG00000065618	protein_coding	COL17A1	936.681	830.112	889.005	1000.44	937.905	916.395
ENSG00000065621	protein_coding	GSTO2	5.57059	7.25891	6.99187	3.438	3.2264	3.23263
ENSG00000065665	protein_coding	SEC61A2	6.9952	5.48753	5.92706	5.56238	3.75385	4.25389
ENSG00000065675	protein_coding	PRKCQ	6.00424	3.58057	4.95181	2.25866	2.28378	2.4252
ENSG00000065717	protein_coding	TLE2	0.244473	0.60919	0.442999	0.656092	0.37952	0.399922
ENSG00000065802	protein_coding	ASB1	10.2045	13.1976	14.3958	10.1947	8.08025	8.43161
ENSG00000065809	protein_coding	FAM107B	6.21544	7.68395	8.28335	6.90491	8.62664	7.77673
ENSG00000065833	protein_coding	ME1	41.9442	54.279	65.4719	27.6248	27.5766	28.4513
ENSG00000065882	protein_coding	TBC1D1	13.3628	11.6124	11.8273	10.6279	12.1639	11.3822
ENSG00000065883	protein_coding	CDK13	4.30668	4.5528	5.39555	4.57152	4.44292	4.43954
ENSG00000065911	protein_coding	MTHFD2	24.4067	34.3412	38.3645	12.3472	12.9926	14.1627
ENSG00000065923	protein_coding	SLC9A7	4.82883	5.61527	6.4014	11.1858	10.1529	11.0436
ENSG00000065970	protein_coding	FOXJ2	8.61983	6.49064	7.70034	12.5682	12.5894	12.8074
ENSG00000065978	protein_coding	YBX1	1022.03	955.157	900.27	1141.46	1014.39	1136.05
ENSG00000065989	protein_coding	PDE4A	0.225058	0.498499	0.645713	0.697943	0.724642	1.08176
ENSG00000066027	protein_coding	PPP2R5A	22.134	27.4705	27.108	5.57174	6.48152	4.94313
ENSG00000066032	protein_coding	CTNNA2	0	0	0	0	0	0
ENSG00000066044	protein_coding	ELAVL1	37.0151	43.455	43.2082	24.0652	22.2962	24.8368
ENSG00000066056	protein_coding	TIE1	0	0	0	0	0	0
ENSG00000066084	protein_coding	DIP2B	17.3488	15.1836	19.2263	21.2365	25.2924	26.2244
ENSG00000066117	protein_coding	SMARCD1	38.7988	25.0081	32.2	19.9919	23.0218	23.8957
ENSG00000066135	protein_coding	KDM4A	28.2801	24.0589	25.3123	33.6846	37.6738	35.9283
ENSG00000066136	protein_coding	NFYC	17.2764	16.3196	15.9982	9.0911	8.29721	9.53341
ENSG00000066185	protein_coding	ZMYND12	0.232591	0.193194	0.105367	0.166455	0.401195	0.197288
ENSG00000066230	protein_coding	SLC9A3	1.41058	2.56299	1.47772	1.32496	0.882001	0.833267
ENSG00000066248	protein_coding	NGEF	1.41912	1.81346	1.8792	0.312492	0.225954	0.105822
ENSG00000066279	protein_coding	ASPM	3.91363	2.43805	2.36391	1.03363	1.06081	0.869425
ENSG00000066294	protein_coding	CD84	0	0	0	0	0	0
ENSG00000066322	protein_coding	ELOVL1	250.604	241.952	252.915	100.538	95.1822	100.323
ENSG00000066336	protein_coding	SPI1	0	0.203652	0	0	0.0845825	0
ENSG00000066379	protein_coding	ZNRD1	9.80854	16.2943	15.5207	5.63539	6.00494	6.27752
ENSG00000066382	protein_coding	MPPED2	0	0	0	0	0	0
ENSG00000066405	protein_coding	CLDN18	0	0	0	0.0488611	0	0.0165463
ENSG00000066422	protein_coding	ZBTB11	9.92554	14.6964	15.4116	11.4527	11.3144	11.3823
ENSG00000066427	protein_coding	ATXN3	4.83075	5.62623	6.66035	5.24208	6.30373	5.07739
ENSG00000066455	protein_coding	GOLGA5	52.39	55.0853	71.8457	62.2431	70.2735	72.4016
ENSG00000066468	protein_coding	FGFR2	5.15448	4.44821	5.12499	5.34161	4.78032	4.88316
ENSG00000066557	protein_coding	LRRC40	19.4491	24.899	37.102	8.61943	8.67927	9.21069
ENSG00000066583	protein_coding	ISOC1	15.9342	20.1782	22.2469	11.5903	10.273	8.98935
ENSG00000066629	protein_coding	EML1	1.98711	1.69769	1.54318	0.751673	1.01847	0.866833
ENSG00000066651	protein_coding	TRMT11	6.11716	7.65835	8.55446	5.04395	5.47452	5.4143
ENSG00000066654	protein_coding	THUMPD1	11.8608	20.3516	24.0729	13.1511	13.0827	12.8782
ENSG00000066697	protein_coding	MSANTD3	33.9955	44.6873	42.1746	43.5244	44.9742	48.1287
ENSG00000066735	protein_coding	KIF26A	0.675774	0.187103	0.20409	0.0268678	0.0777092	0.0454925
ENSG00000066739	protein_coding	ATG2B	4.55471	3.78322	4.7715	3.94717	3.27759	3.79441
ENSG00000066777	protein_coding	ARFGEF1	15.5959	16.6881	19.5747	18.1371	17.3751	17.631
ENSG00000066813	protein_coding	ACSM2B	0	0	0	0	0	0
ENSG00000066827	protein_coding	ZFAT	2.96389	2.98263	2.27224	3.36524	3.14609	3.37737
ENSG00000066855	protein_coding	MTFR1	11.8355	15.4743	19.0636	8.86223	8.01474	9.09626
ENSG00000066923	protein_coding	STAG3	1.00475	0.736379	1.20485	0.867095	0.999074	1.03129
ENSG00000066926	protein_coding	FECH	7.40219	6.82086	8.40945	4.65592	5.76554	5.76714
ENSG00000066933	protein_coding	MYO9A	3.42015	2.71642	2.669	3.92159	3.62576	3.84487
ENSG00000067048	protein_coding	DDX3Y	0	0	0	0	0	0
ENSG00000067057	protein_coding	PFKP	229.985	204.154	207.918	201.978	139.238	158.543
ENSG00000067064	protein_coding	IDI1	98.8877	139.353	151.529	77.7461	81.2376	88.3491
ENSG00000067066	protein_coding	SP100	12.4182	14.2201	12.9422	13.472	13.8674	14.1953
ENSG00000067082	protein_coding	KLF6	139.566	167.266	191.474	157.628	152.681	152.767
ENSG00000067113	protein_coding	PLPP1	16.254	18.2914	18.0519	15.7598	12.0285	15.1847
ENSG00000067141	protein_coding	NEO1	6.17191	2.89983	2.96542	10.8862	9.7641	9.52599
ENSG00000067167	protein_coding	TRAM1	86.3274	162.586	202.992	126.593	102.264	98.3571
ENSG00000067177	protein_coding	PHKA1	13.1014	10.7496	10.2779	8.54711	10.3347	10.6192
ENSG00000067182	protein_coding	TNFRSF1A	115.262	104.471	107.013	91.2807	75.5061	80.0868
ENSG00000067191	protein_coding	CACNB1	4.21722	5.28402	5.60186	3.14595	2.21926	2.51179
ENSG00000067208	protein_coding	EVI5	9.01043	13.6956	15.9942	7.69854	7.18951	7.99192
ENSG00000067221	protein_coding	STOML1	3.78351	4.75426	4.85629	1.19763	1.10442	1.22845
ENSG00000067225	protein_coding	PKM	1215.14	1083.75	1068.59	1259.37	1097.44	1214.27
ENSG00000067248	protein_coding	DHX29	28.7003	42.6864	53.4148	24.2099	25.0921	23.4654
ENSG00000067334	protein_coding	DNTTIP2	32.8606	48.7043	51.017	21.9957	23.1379	22.6811
ENSG00000067365	protein_coding	METTL22	4.73233	5.15592	4.5382	4.02447	3.79515	3.51509
ENSG00000067369	protein_coding	TP53BP1	11.4022	10.152	10.8791	18.0806	18.994	18.3921
ENSG00000067445	protein_coding	TRO	0.0755332	0.125478	0.102653	0.270278	0.156344	0.302039
ENSG00000067533	protein_coding	RRP15	7.14843	8.87967	10.5903	3.7562	5.15428	4.2608
ENSG00000067560	protein_coding	RHOA	526.979	517.334	571.571	296.839	300.122	328.707
ENSG00000067596	protein_coding	DHX8	13.1692	10.7771	13.4947	14.6933	15.5404	14.2559
ENSG00000067606	protein_coding	PRKCZ	15.0306	16.0438	15.7086	13.9412	11.1437	12.3977
ENSG00000067646	protein_coding	ZFY	0	0	0	0	0	0
ENSG00000067704	protein_coding	IARS2	90.1697	116.574	132.326	54.741	51.0402	56.2962
ENSG00000067715	protein_coding	SYT1	1.19099	1.84661	2.01426	0.284112	0.712166	0.837039
ENSG00000067798	protein_coding	NAV3	1.48998	1.68187	2.30187	0.642521	0.514011	0.680525
ENSG00000067829	protein_coding	IDH3G	54.3316	54.5887	50.0718	32.9366	25.9571	33.0311
ENSG00000067836	protein_coding	ROGDI	32.6434	26.3133	25.8321	30.6064	22.1424	24.0504
ENSG00000067840	protein_coding	PDZD4	0	0.0970643	0	0.125445	0.0403135	0.0283204
ENSG00000067842	protein_coding	ATP2B3	0	0	0	0	0	0
ENSG00000067900	protein_coding	ROCK1	17.772	19.175	21.414	20.4219	19.8782	20.092
ENSG00000067955	protein_coding	CBFB	16.7931	28.8029	34.5795	11.3937	11.0974	10.954
ENSG00000067992	protein_coding	PDK3	2.54483	2.73547	2.79734	2.43721	2.69828	2.50775
ENSG00000068001	protein_coding	HYAL2	35.5705	40.7918	40.2329	28.125	18.9608	20.4666
ENSG00000068024	protein_coding	HDAC4	1.25227	1.44991	1.73626	1.12702	0.837827	1.01621
ENSG00000068028	protein_coding	RASSF1	38.0151	43.131	46.1733	10.3993	8.45783	9.42988
ENSG00000068078	protein_coding	FGFR3	42.1688	35.8952	36.4523	21.5292	14.6195	15.5068
ENSG00000068079	protein_coding	IFI35	3.08534	3.20342	1.8636	4.23207	3.45922	3.64517
ENSG00000068097	protein_coding	HEATR6	8.78471	7.05749	8.64422	9.99707	8.52028	8.80379
ENSG00000068120	protein_coding	COASY	35.6053	44.1003	45.8244	33.6746	25.1304	29.4998
ENSG00000068137	protein_coding	PLEKHH3	22.1797	26.757	28.4685	14.3613	8.4531	9.94415
ENSG00000068305	protein_coding	MEF2A	11.0613	9.43108	13.0085	7.75879	7.556	7.83791
ENSG00000068308	protein_coding	OTUD5	48.299	35.5431	40.1136	50.9385	50.7172	50.8252
ENSG00000068323	protein_coding	TFE3	63.1841	47.8746	54.7339	47.6341	45.1334	50.3941
ENSG00000068354	protein_coding	TBC1D25	10.7442	7.75568	11.0094	8.87914	7.06005	9.59395
ENSG00000068366	protein_coding	ACSL4	39.6774	43.2556	62.8754	41.6223	40.5823	40.1533
ENSG00000068383	protein_coding	INPP5A	16.1451	15.2135	16.1645	8.54435	6.83342	7.03635
ENSG00000068394	protein_coding	GPKOW	34.2675	30.7504	32.2948	30.8735	23.0098	30.1415
ENSG00000068400	protein_coding	GRIPAP1	12.6802	14.9055	16.7626	19.6086	15.8092	15.6796
ENSG00000068438	protein_coding	FTSJ1	107.568	116.929	114.503	76.918	59.8977	62.6252
ENSG00000068489	protein_coding	PRR11	21.0124	7.33243	9.91319	17.529	18.1864	20.5049
ENSG00000068615	protein_coding	REEP1	0.173548	0.288304	0.19655	0	0.0299352	0
ENSG00000068650	protein_coding	ATP11A	11.5249	6.9955	9.05301	8.96161	7.59489	7.60031
ENSG00000068654	protein_coding	POLR1A	17.5986	16.8617	18.0866	13.8298	12.3882	14.4
ENSG00000068697	protein_coding	LAPTM4A	259.219	272.001	301.899	174.592	172.964	184.249
ENSG00000068724	protein_coding	TTC7A	20.4184	16.9012	17.9556	16.1041	12.7229	14.0832
ENSG00000068745	protein_coding	IP6K2	32.2012	45.1774	39.1863	44.476	42.6301	41.8176
ENSG00000068781	protein_coding	STON1-GTF2A1L	0.236274	0	0	0.211363	0.448303	0
ENSG00000068784	protein_coding	SRBD1	8.14465	9.27067	9.38355	7.16001	8.46388	9.39404
ENSG00000068796	protein_coding	KIF2A	14.2867	17.3638	22.5094	11.5023	13.6623	14.1549
ENSG00000068831	protein_coding	RASGRP2	0	0.0692565	0.0755443	0.0298355	0	0.0606208
ENSG00000068878	protein_coding	PSME4	34.0238	34.6265	41.2642	25.2925	28.0891	26.955
ENSG00000068885	protein_coding	IFT80	4.01239	6.96309	8.21199	3.56372	3.95483	3.53362
ENSG00000068903	protein_coding	SIRT2	22.6581	22.1375	22.0058	20.9108	20.16	19.8018
ENSG00000068912	protein_coding	ERLEC1	34.8364	58.8468	61.8844	42.9287	42.1974	36.118
ENSG00000068971	protein_coding	PPP2R5B	28.8365	27.8396	31.3931	14.5323	11.0938	12.5134
ENSG00000068976	protein_coding	PYGM	0.653432	0.0904586	0.0493357	0.0389693	0.07514	0.118769
ENSG00000068985	protein_coding	PAGE1	0	0	0	0	0	0
ENSG00000069011	protein_coding	PITX1	70.5949	96.5863	90.9342	30.218	16.3714	19.5374
ENSG00000069018	protein_coding	TRPC7	0	0	0	0	0	0
ENSG00000069020	protein_coding	MAST4	12.8246	11.9444	11.8544	16.3027	15.133	15.9883
ENSG00000069122	protein_coding	ADGRF5	0	0.0638322	0.0696276	0.109995	0.0265113	0.0186243
ENSG00000069188	protein_coding	SDK2	5.13091	3.66305	3.49617	10.849	8.49918	8.11851
ENSG00000069206	protein_coding	ADAM7	0	0	0	0	0	0
ENSG00000069248	protein_coding	NUP133	17.7686	22.173	24.8285	13.0744	12.9215	14.0002
ENSG00000069275	protein_coding	NUCKS1	73.7835	65.9901	69.8076	85.3693	101.842	98.2234
ENSG00000069329	protein_coding	VPS35	50.087	62.9459	66.4413	54.9611	61.4023	62.0694
ENSG00000069345	protein_coding	DNAJA2	47.1318	73.531	78.8608	43.2991	45.4911	47.3157
ENSG00000069399	protein_coding	BCL3	13.4444	17.9764	18.0487	23.8779	17.025	20.1454
ENSG00000069424	protein_coding	KCNAB2	0.0585471	0.0972604	0.039784	0.377095	0.333258	0.379551
ENSG00000069431	protein_coding	ABCC9	0.829747	0.689202	0.652857	0.406292	0.497162	0.698516
ENSG00000069482	protein_coding	GAL	17.5597	25.2814	28.9909	2.51334	1.61539	2.88434
ENSG00000069493	protein_coding	CLEC2D	1.02113	1.63575	1.51992	0.965665	1.15745	0.883817
ENSG00000069509	protein_coding	FUNDC1	44.7957	61.343	65.6327	32.6359	29.6541	30.9059
ENSG00000069535	protein_coding	MAOB	0.175227	1.16437	0.317521	0.75241	0.785843	0.339728
ENSG00000069667	protein_coding	RORA	0.655595	0.495044	0.715485	0.714431	0.832702	0.628308
ENSG00000069696	protein_coding	DRD4	0	0.280717	0	0.120932	0	0
ENSG00000069702	protein_coding	TGFBR3	1.00545	0.736895	1.23249	0.423269	0.428474	0.46584
ENSG00000069764	protein_coding	PLA2G10	0	0.377559	0.411838	0.325303	0.784055	0.440641
ENSG00000069812	protein_coding	HES2	175.442	145.336	152.878	141.066	135.839	139.435
ENSG00000069849	protein_coding	ATP1B3	215.357	290.457	292.592	70.3325	65.6672	62.5264
ENSG00000069869	protein_coding	NEDD4	9.95432	7.43679	10.7572	8.1586	8.11505	7.43267
ENSG00000069943	protein_coding	PIGB	6.92458	10.9467	10.2709	2.43784	1.84942	1.55636
ENSG00000069956	protein_coding	MAPK6	40.9932	51.1737	62.058	53.3477	55.7433	55.0264
ENSG00000069966	protein_coding	GNB5	5.49154	5.63836	5.66654	3.52066	3.32847	3.47966
ENSG00000069974	protein_coding	RAB27A	5.16063	5.86575	5.70105	3.30447	3.02965	3.19251
ENSG00000069998	protein_coding	HDHD5	14.0797	15.4509	16.0156	6.17811	5.63719	5.69115
ENSG00000070010	protein_coding	UFD1	30.8835	38.2612	36.7289	33.3402	34.8116	33.4692
ENSG00000070018	protein_coding	LRP6	5.91967	5.36397	6.47153	9.34816	8.6412	9.91194
ENSG00000070019	protein_coding	GUCY2C	0	0.201077	0.0548332	0	0	0
ENSG00000070031	protein_coding	SCT	0	0	0	0	0	0
ENSG00000070047	protein_coding	PHRF1	49.9828	44.2843	47.7488	33.9505	22.8091	27.3292
ENSG00000070061	protein_coding	ELP1	29.7366	34.9275	36.8463	19.2129	21.7884	23.2743
ENSG00000070081	protein_coding	NUCB2	8.43127	8.12366	8.96306	4.92766	5.95295	4.86988
ENSG00000070087	protein_coding	PFN2	132.12	206.304	230.054	99.1037	95.0262	99.4217
ENSG00000070159	protein_coding	PTPN3	11.115	11.2558	12.2318	13.421	13.4293	13.284
ENSG00000070182	protein_coding	SPTB	0.13714	0.256299	0.0621265	0.233094	0.224724	0.286658
ENSG00000070190	protein_coding	DAPP1	42.2182	48.378	58.9284	32.705	31.2257	34.8461
ENSG00000070193	protein_coding	FGF10	0	0	0	0	0	0
ENSG00000070214	protein_coding	SLC44A1	8.96036	11.7697	13.669	6.36778	7.4906	6.16613
ENSG00000070269	protein_coding	TMEM260	3.45645	4.90678	5.23839	4.96973	5.26824	4.35586
ENSG00000070366	protein_coding	SMG6	13.4405	11.7221	11.4598	20.9035	19.4906	21.2886
ENSG00000070367	protein_coding	EXOC5	9.76167	15.8448	19.2365	6.89865	6.76319	6.66839
ENSG00000070371	protein_coding	CLTCL1	7.16613	7.75477	7.17857	5.39934	5.04878	5.43025
ENSG00000070388	protein_coding	FGF22	0.182607	0	0	0.0653416	0	0.0442545
ENSG00000070404	protein_coding	FSTL3	230.643	173.655	178.283	140.284	116.725	120.973
ENSG00000070413	protein_coding	DGCR2	66.2497	60.0649	61.0902	39.8661	30.0983	30.9705
ENSG00000070423	protein_coding	RNF126	80.0893	79.2179	80.1524	16.1432	6.99599	9.31301
ENSG00000070444	protein_coding	MNT	8.86183	6.1017	7.71213	10.4309	7.07969	8.26563
ENSG00000070476	protein_coding	ZXDC	7.47529	11.6133	11.0372	10.0803	9.12136	8.83167
ENSG00000070495	protein_coding	JMJD6	16.4873	20.8243	21.4829	11.2518	10.2614	9.95828
ENSG00000070501	protein_coding	POLB	11.7369	17.0349	16.2308	21.7062	20.3301	19.896
ENSG00000070526	protein_coding	ST6GALNAC1	21.062	24.4426	25.3084	41.852	42.8742	44.3644
ENSG00000070540	protein_coding	WIPI1	25.6398	20.8016	25.5265	24.5901	25.4556	26.7156
ENSG00000070601	protein_coding	FRMPD1	0.0857908	0	0.0388645	0	0	0.0207913
ENSG00000070610	protein_coding	GBA2	25.6651	25.1779	26.8896	19.1987	15.4488	17.751
ENSG00000070614	protein_coding	NDST1	91.2926	68.5918	79.3013	100.374	88.3344	95.1128
ENSG00000070669	protein_coding	ASNS	5.28418	4.9055	4.08356	2.48402	2.68078	2.61145
ENSG00000070718	protein_coding	AP3M2	7.11293	7.04946	7.9458	8.41651	10.6796	9.5593
ENSG00000070729	protein_coding	CNGB1	0.485769	0.403488	0.282935	0.769779	0.742139	0.597036
ENSG00000070731	protein_coding	ST6GALNAC2	53.567	41.6865	43.9402	97.2293	99.1012	95.3984
ENSG00000070748	protein_coding	CHAT	0	0	0	0	0	0
ENSG00000070756	protein_coding	PABPC1	908.14	684.92	702.994	694.911	680.677	715.548
ENSG00000070759	protein_coding	TESK2	1.37557	1.01562	1.66175	2.07825	1.58181	1.85205
ENSG00000070761	protein_coding	CFAP20	41.2083	40.4517	42.7267	42.265	42.876	42.0299
ENSG00000070770	protein_coding	CSNK2A2	32.9078	28.5816	33.7044	26.2896	28.5293	29.9849
ENSG00000070778	protein_coding	PTPN21	7.60591	7.69099	10.0971	7.31282	7.34685	7.77384
ENSG00000070785	protein_coding	EIF2B3	24.3899	30.5116	28.9699	10.3771	10.5175	10.4521
ENSG00000070808	protein_coding	CAMK2A	0	0	0	0.146884	0.0566438	0.0497406
ENSG00000070814	protein_coding	TCOF1	32.0626	19.4489	20.0696	16.3921	14.2583	16.1801
ENSG00000070831	protein_coding	CDC42	60.6132	76.3608	85.3407	39.0291	42.315	43.2076
ENSG00000070882	protein_coding	OSBPL3	26.3392	23.5447	28.3244	22.6197	23.5599	24.4768
ENSG00000070886	protein_coding	EPHA8	0	0	0.0422904	0.0668086	0	0.033936
ENSG00000070915	protein_coding	SLC12A3	0	0	0	0.058744	0.0566347	0
ENSG00000070950	protein_coding	RAD18	7.40875	6.57615	7.27192	2.20921	1.85425	2.25318
ENSG00000070961	protein_coding	ATP2B1	8.22936	9.54299	11.4019	6.59686	6.17564	6.98031
ENSG00000070985	protein_coding	TRPM5	0	0	0	0	0	0
ENSG00000071051	protein_coding	NCK2	84.0637	73.9321	75.6235	54.3641	44.9415	50.2087
ENSG00000071054	protein_coding	MAP4K4	52.6324	55.1663	66.957	129.405	135.19	142.833
ENSG00000071073	protein_coding	MGAT4A	0.421155	0.612182	0.524671	0.734665	0.599319	0.421024
ENSG00000071082	protein_coding	RPL31	356.164	525.398	459.699	106.841	111.162	123.708
ENSG00000071127	protein_coding	WDR1	171.945	169.63	180.128	143.346	132.005	130.573
ENSG00000071189	protein_coding	SNX13	2.9353	4.41426	5.26294	3.02937	2.36632	2.50475
ENSG00000071203	protein_coding	MS4A12	0	0	0	0	0	0
ENSG00000071205	protein_coding	ARHGAP10	5.75438	4.81886	4.35894	4.75949	5.33709	5.36679
ENSG00000071242	protein_coding	RPS6KA2	4.79553	3.57471	3.59289	2.44196	2.03613	1.95188
ENSG00000071243	protein_coding	ING3	3.90216	4.69974	4.10999	1.32648	1.41347	1.92683
ENSG00000071246	protein_coding	VASH1	0.0702314	0.350012	0.0318158	0.427222	0.193826	0.246797
ENSG00000071282	protein_coding	LMCD1	1.57384	1.82082	1.2477	0.703951	0.678675	0.715157
ENSG00000071462	protein_coding	BUD23	27.3947	25.6718	23.5765	14.1897	12.777	14.9418
ENSG00000071537	protein_coding	SEL1L	13.063	17.5106	22.6606	18.9632	20.041	19.3166
ENSG00000071539	protein_coding	TRIP13	34.5422	24.6288	21.9489	3.71898	4.05998	4.66716
ENSG00000071553	protein_coding	ATP6AP1	69.5676	73.7006	71.0978	33.6132	27.8076	30.0974
ENSG00000071564	protein_coding	TCF3	61.4735	55.7657	51.0931	34.6346	23.1611	23.8711
ENSG00000071575	protein_coding	TRIB2	8.84536	11.8472	10.769	6.21152	5.41634	6.85971
ENSG00000071626	protein_coding	DAZAP1	44.9887	43.4591	45.6564	30.48	27.826	26.9768
ENSG00000071655	protein_coding	MBD3	26.4897	26.2116	25.5695	7.36725	4.84578	4.8731
ENSG00000071677	protein_coding	PRLH	0	0	0	0	0	0
ENSG00000071794	protein_coding	HLTF	8.92626	6.99463	9.68969	7.23183	6.68165	6.28572
ENSG00000071859	protein_coding	FAM50A	81.6977	101.046	84.106	94.1025	84.0033	85.3876
ENSG00000071889	protein_coding	FAM3A	22.8864	21.324	19.9243	9.82723	5.56104	5.78763
ENSG00000071894	protein_coding	CPSF1	27.9683	28.6561	28.4128	15.581	9.44625	11.3847
ENSG00000071909	protein_coding	MYO3B	0.923897	0.972046	1.0603	0.837508	0.743691	1.32104
ENSG00000071967	protein_coding	CYBRD1	18.6356	23.7074	28.5258	14.9511	17.4257	15.3198
ENSG00000071991	protein_coding	CDH19	0	0	0.0334799	0.0264451	0.0254955	0.008955
ENSG00000071994	protein_coding	PDCD2	19.5048	36.5661	39.744	10.2308	10.6741	10.8587
ENSG00000072041	protein_coding	SLC6A15	10.463	18.0574	20.8029	8.94387	9.76573	8.3044
ENSG00000072042	protein_coding	RDH11	98.8174	96.1042	101.611	77.0911	79.2566	77.9716
ENSG00000072062	protein_coding	PRKACA	35.3994	24.1381	26.2177	34.6129	36.2669	36.7899
ENSG00000072071	protein_coding	ADGRL1	2.27132	1.93624	2.24742	2.60932	2.12385	2.46979
ENSG00000072080	protein_coding	SPP2	0	0	0	0	0	0
ENSG00000072110	protein_coding	ACTN1	272.355	212.185	230.065	176.104	150.199	151.018
ENSG00000072121	protein_coding	ZFYVE26	4.74849	3.40756	5.10712	5.94121	5.82817	6.95954
ENSG00000072133	protein_coding	RPS6KA6	0.807589	1.10202	1.17594	0.68116	0.417901	0.719963
ENSG00000072134	protein_coding	EPN2	18.047	16.6227	18.4017	16.091	12.7188	12.5147
ENSG00000072135	protein_coding	PTPN18	19.647	14.9959	12.9496	19.0322	18.5626	18.2521
ENSG00000072163	protein_coding	LIMS2	0	0	0	0.0855515	0	0.007243
ENSG00000072182	protein_coding	ASIC4	0	0	0	0.034575	0	0
ENSG00000072195	protein_coding	SPEG	4.2209	3.6294	3.2183	3.70143	2.52258	3.23448
ENSG00000072201	protein_coding	LNX1	1.62359	1.34858	2.1248	1.58151	0.933505	1.38809
ENSG00000072210	protein_coding	ALDH3A2	16.048	18.1119	18.6471	11.5203	12.2938	12.2049
ENSG00000072274	protein_coding	TFRC	21.8038	27.4092	37.3574	36.2851	36.0825	33.3531
ENSG00000072310	protein_coding	SREBF1	88.865	88.9433	85.5325	35.652	25.4126	28.6877
ENSG00000072315	protein_coding	TRPC5	0.0868781	0	0	0.0310873	0	0
ENSG00000072364	protein_coding	AFF4	26.1712	26.1457	33.6733	38.5693	35.1988	37.1781
ENSG00000072401	protein_coding	UBE2D1	12.3905	20.5835	26.7446	4.32933	5.38078	4.96348
ENSG00000072415	protein_coding	MPP5	9.04203	12.0841	16.3322	13.2945	13.457	13.5483
ENSG00000072422	protein_coding	RHOBTB1	8.17339	6.17178	8.6075	5.8873	7.17728	7.34443
ENSG00000072501	protein_coding	SMC1A	32.7575	19.1708	22.7307	34.6451	38.7426	37.3366
ENSG00000072506	protein_coding	HSD17B10	271.888	279.262	258.738	110.511	97.2578	111.386
ENSG00000072518	protein_coding	MARK2	40.721	32.2488	33.3469	32.7701	23.3183	26.4397
ENSG00000072571	protein_coding	HMMR	12.9014	5.67952	6.89651	4.2933	5.25181	4.15841
ENSG00000072609	protein_coding	CHFR	8.14517	7.45437	7.94331	4.59971	3.76017	3.97665
ENSG00000072657	protein_coding	TRHDE	0	0	0	0.0296019	0	0
ENSG00000072682	protein_coding	P4HA2	50.5969	43.6125	45.8152	69.1745	72.8862	70.5069
ENSG00000072694	protein_coding	FCGR2B	0	0	0	0	0	0
ENSG00000072736	protein_coding	NFATC3	4.09005	3.15802	3.88838	3.99894	3.99446	3.95091
ENSG00000072756	protein_coding	TRNT1	4.37161	9.15045	9.14945	3.75427	5.58001	4.94764
ENSG00000072778	protein_coding	ACADVL	157.131	187.687	185.227	157.718	156.593	145.575
ENSG00000072786	protein_coding	STK10	14.2824	16.1169	18.766	21.7456	19.9833	19.5613
ENSG00000072803	protein_coding	FBXW11	22.6489	20.4747	25.1769	24.2155	23.4402	25.1521
ENSG00000072818	protein_coding	ACAP1	0.546934	0.795012	0.433596	0.538196	0.636796	0.430783
ENSG00000072832	protein_coding	CRMP1	2.1675	1.0082	1.57105	3.19543	3.31997	3.34084
ENSG00000072840	protein_coding	EVC	9.23104	5.48518	7.26989	15.6009	13.326	14.6704
ENSG00000072849	protein_coding	DERL2	14.5437	23.8304	22.5017	7.1379	6.96385	7.40561
ENSG00000072858	protein_coding	SIDT1	0.818195	0.940994	1.02643	1.14857	1.38959	1.30413
ENSG00000072864	protein_coding	NDE1	18.8361	15.4155	16.4804	16.3876	17.7103	19.0652
ENSG00000072952	protein_coding	MRVI1	0.658807	0.656659	0.626743	0.495052	0.454548	0.494949
ENSG00000072954	protein_coding	TMEM38A	3.90608	3.66765	4.07757	3.95003	4.27689	4.21869
ENSG00000072958	protein_coding	AP1M1	13.6254	13.3112	13.5443	5.30498	3.7141	4.24738
ENSG00000073008	protein_coding	PVR	71.3754	67.5082	73.7504	71.9765	72.1471	78.3337
ENSG00000073050	protein_coding	XRCC1	22.145	16.3231	16.7421	16.7403	12.8	13.3637
ENSG00000073060	protein_coding	SCARB1	38.3361	46.1037	45.6583	26.685	21.5445	24.8308
ENSG00000073067	protein_coding	CYP2W1	0.181756	0.15097	0.0823381	0	0	0.0220242
ENSG00000073111	protein_coding	MCM2	23.024	10.3663	12.1848	6.3522	4.4539	4.74547
ENSG00000073146	protein_coding	MOV10L1	0	0	0.0334409	0.132071	0.0509316	0.107339
ENSG00000073150	protein_coding	PANX2	5.55835	5.70318	5.9988	4.21185	2.0867	3.01107
ENSG00000073169	protein_coding	SELENOO	57.3187	66.6895	69.3405	23.9669	11.1829	11.4719
ENSG00000073282	protein_coding	TP63	87.102	74.4896	86.7841	104.037	94.2404	98.5418
ENSG00000073331	protein_coding	ALPK1	1.9343	2.15361	1.8644	2.40042	2.82535	2.63312
ENSG00000073350	protein_coding	LLGL2	18.9854	21.5766	20.9205	7.55086	3.9607	5.47155
ENSG00000073417	protein_coding	PDE8A	7.54204	6.84362	8.03918	9.25284	9.97008	10.1911
ENSG00000073464	protein_coding	CLCN4	1.19554	0.68271	0.744694	1.49728	1.44352	1.27665
ENSG00000073536	protein_coding	NLE1	14.1761	12.9293	13.0118	5.00627	4.95437	5.25437
ENSG00000073578	protein_coding	SDHA	41.9599	44.2749	46.9312	41.4397	35.8188	37.7443
ENSG00000073584	protein_coding	SMARCE1	18.2643	17.9767	18.2028	16.55	16.4863	18.9167
ENSG00000073598	protein_coding	FNDC8	0	0	0	0	0	0
ENSG00000073605	protein_coding	GSDMB	3.52219	3.21101	3.8528	12.05	13.4844	13.6784
ENSG00000073614	protein_coding	KDM5A	8.4343	8.16161	8.61604	14.9694	15.6248	15.5296
ENSG00000073670	protein_coding	ADAM11	0	0	0.0477469	0.0377143	0	0
ENSG00000073711	protein_coding	PPP2R3A	5.86452	4.97942	5.78573	4.75656	4.85552	5.58239
ENSG00000073712	protein_coding	FERMT2	5.99411	4.97881	5.24076	2.44513	2.85362	2.28794
ENSG00000073734	protein_coding	ABCB11	0.131505	0.218461	0.357443	0.470561	0.70318	0.454149
ENSG00000073737	protein_coding	DHRS9	25.0259	48.9897	52.886	15.1992	16.0534	14.933
ENSG00000073754	protein_coding	CD5L	0	0	0	0	0	0
ENSG00000073756	protein_coding	PTGS2	38.9253	38.7344	55.4764	12.3426	11.7997	12.1421
ENSG00000073792	protein_coding	IGF2BP2	59.781	58.1979	59.1137	81.2714	81.6795	86.966
ENSG00000073803	protein_coding	MAP3K13	4.3065	4.68025	6.05328	5.0838	5.16506	5.98405
ENSG00000073849	protein_coding	ST6GAL1	5.77592	4.29014	4.12614	12.6789	13.2582	14.0382
ENSG00000073861	protein_coding	TBX21	0	0	0	0	0	0
ENSG00000073910	protein_coding	FRY	0	0.0670522	0.03657	0.077029	0.0185658	0.0749945
ENSG00000073921	protein_coding	PICALM	67.5095	85.1084	98.6694	54.1523	59.5202	59.056
ENSG00000073969	protein_coding	NSF	18.2439	23.6566	25.0697	20.5637	22.0631	24.0474
ENSG00000074047	protein_coding	GLI2	0.414615	0.172193	0.0939133	0.123634	0.0715166	0.0669875
ENSG00000074054	protein_coding	CLASP1	30.9363	22.2268	23.9745	28.0195	27.0926	27.6201
ENSG00000074071	protein_coding	MRPS34	215.028	252.737	211.999	155.209	75.2967	95.4261
ENSG00000074181	protein_coding	NOTCH3	30.8963	19.5719	19.9566	24.4263	17.0016	19.0393
ENSG00000074201	protein_coding	CLNS1A	40.6401	57.5789	58.4924	54.8004	66.6616	63.2004
ENSG00000074211	protein_coding	PPP2R2C	0.974916	1.25966	1.32495	1.76364	1.71899	1.35199
ENSG00000074219	protein_coding	TEAD2	19.9167	18.2399	18.2765	28.8725	26.3089	30.0128
ENSG00000074266	protein_coding	EED	6.93068	8.97556	9.45286	3.11998	3.4193	3.40443
ENSG00000074276	protein_coding	CDHR2	0	0	0.0859408	0.101824	0.130891	0.0459757
ENSG00000074317	protein_coding	SNCB	1.51578	0.629516	0.572226	0	0.522912	0.0612245
ENSG00000074319	protein_coding	TSG101	51.1844	57.673	60.584	34.8447	32.7574	33.8618
ENSG00000074356	protein_coding	NCBP3	8.61551	7.47106	8.3367	5.83277	6.36043	6.95707
ENSG00000074370	protein_coding	ATP2A3	0	0	0.033339	0	0	0.008918
ENSG00000074410	protein_coding	CA12	87.4948	76.9496	70.8332	112.029	116.609	108.806
ENSG00000074416	protein_coding	MGLL	21.7914	17.318	20.1315	10.7542	8.00495	10.6297
ENSG00000074527	protein_coding	NTN4	37.626	52.9983	59.1891	67.2744	63.6406	65.8812
ENSG00000074582	protein_coding	BCS1L	30.1757	43.6445	39.9219	15.4176	15.7444	15.3355
ENSG00000074590	protein_coding	NUAK1	7.96246	4.14863	4.59087	7.58919	8.24063	7.79771
ENSG00000074603	protein_coding	DPP8	10.4328	10.6876	14.4937	7.50181	7.47238	7.14565
ENSG00000074621	protein_coding	SLC24A1	2.12205	3.10776	3.31402	5.35525	5.20149	5.16982
ENSG00000074657	protein_coding	ZNF532	17.4032	10.7886	11.4989	15.2493	15.5511	15.7441
ENSG00000074660	protein_coding	SCARF1	0	0.0849851	0.231752	0.219668	0.247077	0.173572
ENSG00000074695	protein_coding	LMAN1	40.8666	38.6648	46.4912	49.97	50.7417	51.7883
ENSG00000074696	protein_coding	HACD3	50.9665	54.402	57.2329	43.5824	37.0052	39.7784
ENSG00000074706	protein_coding	IPCEF1	0.17959	0.0994469	0.0271189	0.0428414	0.0413031	0.0435233
ENSG00000074755	protein_coding	ZZEF1	10.8238	8.64565	8.96775	6.67214	6.50967	6.45723
ENSG00000074771	protein_coding	NOX3	0	0	0	0	0	0
ENSG00000074800	protein_coding	ENO1	1409.22	1337.58	1296.8	1052.68	878.025	938.859
ENSG00000074803	protein_coding	SLC12A1	0	0.032821	0	0	0	0
ENSG00000074842	protein_coding	MYDGF	225.391	228.088	209.577	117.933	111.812	114.62
ENSG00000074855	protein_coding	ANO8	7.39891	8.58708	9.18305	4.20703	2.93708	3.09497
ENSG00000074935	protein_coding	TUBE1	2.07579	4.45911	4.183	2.84304	3.03727	2.74952
ENSG00000074964	protein_coding	ARHGEF10L	10.9696	11.1246	11.499	4.29036	2.57419	3.50084
ENSG00000074966	protein_coding	TXK	0.146359	0.121568	0.265212	0.0523713	0.252454	0.21282
ENSG00000075035	protein_coding	WSCD2	0	0	0	0	0	0
ENSG00000075043	protein_coding	KCNQ2	0	0.0329829	0	0	0	0
ENSG00000075073	protein_coding	TACR2	0.520823	0.576805	0.393234	0.43485	0.71869	0.420735
ENSG00000075089	protein_coding	ACTR6	8.64759	21.438	28.7483	5.09376	3.21271	3.64335
ENSG00000075131	protein_coding	TIPIN	9.44554	9.99933	9.48085	3.51241	3.45019	3.9274
ENSG00000075142	protein_coding	SRI	61.3	86.5188	84.1771	51.1954	46.2594	47.1793
ENSG00000075151	protein_coding	EIF4G3	32.0355	28.9803	34.8445	48.2361	51.1727	53.4367
ENSG00000075188	protein_coding	NUP37	29.9598	36.9653	40.7826	8.69084	7.62619	7.85991
ENSG00000075213	protein_coding	SEMA3A	16.8747	15.7002	19.5579	15.37	15.7253	15.9267
ENSG00000075218	protein_coding	GTSE1	8.8802	3.27824	3.18476	2.16252	1.70193	2.52573
ENSG00000075223	protein_coding	SEMA3C	84.3251	88.4158	114.262	114.297	133.058	120.682
ENSG00000075234	protein_coding	TTC38	7.656	7.53684	8.6707	4.61661	4.20629	3.45315
ENSG00000075239	protein_coding	ACAT1	13.0515	19.1689	21.3791	12.5569	12.1657	14.5269
ENSG00000075240	protein_coding	GRAMD4	13.2487	12.4662	11.5348	11	8.17695	7.425
ENSG00000075275	protein_coding	CELSR1	39.692	32.6069	35.998	32.7573	23.6551	22.8914
ENSG00000075290	protein_coding	WNT8B	0	0	0	0	0	0.0286705
ENSG00000075292	protein_coding	ZNF638	14.1115	18.8148	20.2835	19.4848	18.4625	19.5831
ENSG00000075303	protein_coding	SLC25A40	3.29274	3.56379	4.11336	1.64238	1.54899	1.51135
ENSG00000075336	protein_coding	TIMM21	18.8388	21.3232	20.8271	11.9103	12.9643	13.5547
ENSG00000075340	protein_coding	ADD2	0	0	0	0.0716164	0	0
ENSG00000075388	protein_coding	FGF4	0	0	0	0	0	0
ENSG00000075391	protein_coding	RASAL2	9.58029	7.98381	11.1007	10.2843	10.8312	10.1951
ENSG00000075399	protein_coding	VPS9D1	11.9986	13.877	15.4121	8.36943	4.55841	6.66226
ENSG00000075407	protein_coding	ZNF37A	3.26906	3.67369	4.49506	4.27994	5.08153	5.07041
ENSG00000075413	protein_coding	MARK3	36.2874	34.1218	36.8061	24.7646	25.5288	25.2003
ENSG00000075415	protein_coding	SLC25A3	133.948	177.523	182.274	44.5227	46.0912	49.9301
ENSG00000075420	protein_coding	FNDC3B	15.4956	16.3495	21.4559	35.312	36.3557	34.1025
ENSG00000075426	protein_coding	FOSL2	51.4223	46.4775	52.7507	77.9604	68.3193	63.9241
ENSG00000075429	protein_coding	CACNG5	0	0	0	0	0	0
ENSG00000075461	protein_coding	CACNG4	0	0	0.0641378	0.557273	0.0976841	0.102935
ENSG00000075539	protein_coding	FRYL	9.63457	7.84027	9.61478	10.5224	11.3488	11.8912
ENSG00000075568	protein_coding	TMEM131	15.9085	13.2138	14.5897	17.147	17.001	17.3493
ENSG00000075618	protein_coding	FSCN1	464.356	481.843	482.909	147.659	92.4918	111.439
ENSG00000075624	protein_coding	ACTB	8092.57	6521.58	6796.34	2455.27	2005.1	2337.93
ENSG00000075643	protein_coding	MOCOS	5.87522	6.81871	7.43779	4.98219	4.60895	5.39308
ENSG00000075651	protein_coding	PLD1	3.3135	3.01437	3.28805	4.051	4.15049	3.99121
ENSG00000075673	protein_coding	ATP12A	12.6763	4.93258	7.76021	1.55284	1.45769	2.22796
ENSG00000075702	protein_coding	WDR62	2.89461	0.644013	1.63913	1.09126	0.552785	0.463495
ENSG00000075711	protein_coding	DLG1	15.7529	18.9906	24.1857	30.3665	30.7774	30.0143
ENSG00000075785	protein_coding	RAB7A	465.294	458.926	464.885	475.992	493.137	523.092
ENSG00000075790	protein_coding	BCAP29	11.8842	18.6902	20.3598	9.67065	9.30259	10.329
ENSG00000075826	protein_coding	SEC31B	1.66238	1.80566	1.30341	2.05907	2.11748	1.9369
ENSG00000075856	protein_coding	SART3	16.0082	18.3174	19.1379	15.8297	13.9323	14.3351
ENSG00000075884	protein_coding	ARHGAP15	0	0	0.0375071	0	0	0.0200651
ENSG00000075886	protein_coding	TUBA3D	0	0.268038	0.146187	0.92376	0.333972	0.391027
ENSG00000075891	protein_coding	PAX2	0	0	0	0	0	0
ENSG00000075914	protein_coding	EXOSC7	29.2068	38.0543	33.6744	16.5576	14.0665	15.3639
ENSG00000075945	protein_coding	KIFAP3	14.8781	24.3774	25.1595	10.9757	10.5465	11.7432
ENSG00000075975	protein_coding	MKRN2	37.292	45.8557	44.719	18.9041	19.9281	19.9582
ENSG00000076003	protein_coding	MCM6	29.5658	14.9793	17.0618	5.53117	7.44866	7.09091
ENSG00000076043	protein_coding	REXO2	85.5754	122.454	111.703	91.5201	74.0407	80.7295
ENSG00000076053	protein_coding	RBM7	5.46847	9.19129	12.0659	4.7653	5.39319	4.46696
ENSG00000076067	protein_coding	RBMS2	39.6651	35.2154	39.315	46.8561	49.1197	53.7392
ENSG00000076108	protein_coding	BAZ2A	36.5198	24.1977	26.7524	50.1762	54.0647	54.2573
ENSG00000076201	protein_coding	PTPN23	23.7722	18.8993	21.7306	20.7494	16.3725	15.7197
ENSG00000076242	protein_coding	MLH1	10.7567	9.62194	12.7157	6.4454	7.02639	7.38096
ENSG00000076248	protein_coding	UNG	32.0139	24.9498	28.0207	19.4459	17.9978	20.3062
ENSG00000076258	protein_coding	FMO4	2.79384	2.65212	2.07928	1.35675	1.7211	1.71689
ENSG00000076321	protein_coding	KLHL20	13.0287	14.8924	14.241	13.9005	14.4735	14.0204
ENSG00000076344	protein_coding	RGS11	0.211455	0.878192	0.478962	0.529651	0.401211	0.371533
ENSG00000076351	protein_coding	SLC46A1	4.01794	3.23142	3.49591	2.64725	2.59619	2.58892
ENSG00000076356	protein_coding	PLXNA2	14.4362	10.2866	11.7185	11.8915	11.0474	11.9831
ENSG00000076382	protein_coding	SPAG5	14.6799	6.94455	8.98436	4.97455	5.299	5.83123
ENSG00000076513	protein_coding	ANKRD13A	17.9446	18.0581	19.1348	19.362	21.3097	20.5985
ENSG00000076554	protein_coding	TPD52	17.6995	28.4263	30.9791	6.35549	6.72506	6.78661
ENSG00000076555	protein_coding	ACACB	0.349729	0.145245	0.174275	0.23777	0.205103	0.127134
ENSG00000076604	protein_coding	TRAF4	69.7747	93.8907	88.3946	40.5272	34.3267	36.1719
ENSG00000076641	protein_coding	PAG1	2.85326	1.29966	2.4392	0.658691	0.63504	0.780706
ENSG00000076650	protein_coding	GPATCH1	7.26471	6.31705	5.65644	5.1584	4.62075	5.08921
ENSG00000076662	protein_coding	ICAM3	8.55173	12.9974	9.31422	6.38051	3.8917	3.72609
ENSG00000076685	protein_coding	NT5C2	69.5593	80.7409	83.0795	79.0009	84.8871	82.7858
ENSG00000076706	protein_coding	MCAM	71.9024	61.8239	68.0562	72.4657	61.1867	66.1654
ENSG00000076716	protein_coding	GPC4	5.72852	3.9935	3.84632	2.59888	2.29382	3.03691
ENSG00000076770	protein_coding	MBNL3	1.41385	1.96879	2.29825	1.33918	0.975496	1.13879
ENSG00000076826	protein_coding	CAMSAP3	19.1605	13.219	14.0397	7.79276	5.09291	4.948
ENSG00000076864	protein_coding	RAP1GAP	4.05472	4.24651	3.83342	1.10394	0.699396	1.37786
ENSG00000076924	protein_coding	XAB2	31.3984	32.419	30.868	20.0907	11.7344	12.5898
ENSG00000076928	protein_coding	ARHGEF1	46.5223	42.4479	49.8675	17.1514	11.0034	13.0114
ENSG00000076944	protein_coding	STXBP2	43.1979	44.3974	48.8851	36.5083	33.0229	34.4518
ENSG00000076984	protein_coding	MAP2K7	19.0292	17.4439	15.7224	12.701	8.67352	9.55793
ENSG00000077009	protein_coding	NMRK2	0	0	0	0	0	0
ENSG00000077044	protein_coding	DGKD	3.27077	2.9755	2.63415	2.4522	1.71938	2.0257
ENSG00000077063	protein_coding	CTTNBP2	1.31024	0.967384	1.08819	1.40652	1.50668	1.35834
ENSG00000077080	protein_coding	ACTL6B	0	0	0	0	0	0
ENSG00000077092	protein_coding	RARB	3.29314	1.59562	2.05128	9.81979	11.1713	9.29441
ENSG00000077097	protein_coding	TOP2B	42.2175	44.6175	56.4248	51.6266	58.6908	55.7334
ENSG00000077147	protein_coding	TM9SF3	39.8704	75.8486	94.1425	36.8899	36.8497	33.3759
ENSG00000077150	protein_coding	NFKB2	38.6326	34.5022	39.0485	50.5203	39.9451	43.2268
ENSG00000077152	protein_coding	UBE2T	39.6122	21.4249	24.2047	8.35075	6.7797	9.45111
ENSG00000077157	protein_coding	PPP1R12B	0.794546	0.879951	0.970749	2.40371	2.42538	3.00797
ENSG00000077232	protein_coding	DNAJC10	13.3123	16.2971	19.8255	9.70956	9.1769	8.99854
ENSG00000077235	protein_coding	GTF3C1	31.9848	30.831	32.5171	33.8484	28.5311	30.0436
ENSG00000077238	protein_coding	IL4R	74.0575	64.0198	66.7858	66.4808	61.8631	69.4404
ENSG00000077254	protein_coding	USP33	13.1257	19.064	20.2301	7.16315	8.22136	7.3838
ENSG00000077264	protein_coding	PAK3	0	0.0403366	0.0659982	0.208523	0.167529	0.182419
ENSG00000077274	protein_coding	CAPN6	0	0	0	0.0513927	0.0990946	0.0348072
ENSG00000077279	protein_coding	DCX	0	0	0	0	0	0
ENSG00000077312	protein_coding	SNRPA	98.3086	66.4357	60.65	57.1634	52.954	58.7264
ENSG00000077327	protein_coding	SPAG6	0	0	0.0592894	0	0	0
ENSG00000077348	protein_coding	EXOSC5	21.1367	25.8728	26.0379	7.96135	2.68642	5.52686
ENSG00000077380	protein_coding	DYNC1I2	104.265	119.9	132.597	105.084	119.388	112.989
ENSG00000077420	protein_coding	APBB1IP	0.132001	0	0	0	0	0
ENSG00000077454	protein_coding	LRCH4	20.9556	18.3533	19.5353	12.2679	8.90128	9.89799
ENSG00000077458	protein_coding	FAM76B	3.36449	3.63298	4.57249	4.03308	4.99091	3.96478
ENSG00000077463	protein_coding	SIRT6	25.0965	34.0273	32.1009	10.1688	5.72939	7.40138
ENSG00000077498	protein_coding	TYR	0	0	0	0	0	0
ENSG00000077514	protein_coding	POLD3	9.40605	7.50644	6.51694	5.41158	5.5672	5.14015
ENSG00000077522	protein_coding	ACTN2	0	0	0	0	0	0.0405672
ENSG00000077549	protein_coding	CAPZB	307.282	308.83	273.369	152.826	154.902	165.146
ENSG00000077585	protein_coding	GPR137B	17.1513	22.465	22.0143	26.4371	31.0253	25.126
ENSG00000077616	protein_coding	NAALAD2	0.212311	0.176349	0.384719	0.0253235	0	0.0343021
ENSG00000077684	protein_coding	JADE1	2.24163	1.76884	2.81799	1.22323	1.02464	1.11368
ENSG00000077713	protein_coding	SLC25A43	42.3479	46.8998	52.3721	12.4039	12.3284	16.7585
ENSG00000077721	protein_coding	UBE2A	37.2156	61.4191	66.5099	35.488	31.2562	33.5857
ENSG00000077782	protein_coding	FGFR1	1.79575	1.52202	1.6104	1.53429	1.3022	1.19457
ENSG00000077800	protein_coding	FKBP6	0.427544	0.266344	0.145263	0.382467	0.258114	0.3497
ENSG00000077935	protein_coding	SMC1B	0	0	0.0540338	0.0853604	0	0.0578128
ENSG00000077942	protein_coding	FBLN1	22.0739	21.6896	20.662	26.9101	18.6171	18.5463
ENSG00000077943	protein_coding	ITGA8	0	0	0.0313942	0	0	0
ENSG00000077984	protein_coding	CST7	0	0	0	0	0	0
ENSG00000078018	protein_coding	MAP2	8.81144	4.31996	5.76364	12.4427	12.8856	13.0991
ENSG00000078043	protein_coding	PIAS2	2.80617	2.97965	3.72198	2.24634	2.23554	2.05775
ENSG00000078053	protein_coding	AMPH	0	0	0	0.0661391	0	0
ENSG00000078061	protein_coding	ARAF	27.8395	22.8855	24.9633	28.3447	17.9209	20.2232
ENSG00000078070	protein_coding	MCCC1	7.76631	9.5785	10.0217	7.20012	6.77921	8.86894
ENSG00000078081	protein_coding	LAMP3	0	0	0	2.15808	2.03436	1.96507
ENSG00000078098	protein_coding	FAP	2.62086	3.68868	4.28742	3.38655	2.91334	3.14052
ENSG00000078114	protein_coding	NEBL	2.52637	4.38206	5.23433	2.19354	2.17886	2.18344
ENSG00000078124	protein_coding	ACER3	11.4772	15.5725	18.3474	4.25737	4.95443	4.63096
ENSG00000078140	protein_coding	UBE2K	56.3102	65.8064	76.2174	38.3713	37.3989	40.5129
ENSG00000078142	protein_coding	PIK3C3	5.11628	7.41609	9.10437	4.52302	4.38368	4.89081
ENSG00000078177	protein_coding	N4BP2	1.29263	1.632	2.08467	1.62814	1.74805	1.38464
ENSG00000078237	protein_coding	TIGAR	8.0572	16.508	18.1528	13.5505	11.9706	12.9526
ENSG00000078246	protein_coding	TULP3	21.5423	11.2662	14.024	23.7533	25.3226	29.7776
ENSG00000078269	protein_coding	SYNJ2	4.45801	4.67912	4.86527	2.81335	2.8801	2.97599
ENSG00000078295	protein_coding	ADCY2	0	0	0	0	0	0
ENSG00000078304	protein_coding	PPP2R5C	16.0467	16.9262	19.2671	10.5692	10.4224	10.7375
ENSG00000078328	protein_coding	RBFOX1	0	0	0	0	0	0
ENSG00000078369	protein_coding	GNB1	191.624	183.724	201.443	217.274	203.554	204.85
ENSG00000078399	protein_coding	HOXA9	0	0.277848	0.303074	0.119696	0.057699	0.0202669
ENSG00000078401	protein_coding	EDN1	41.6295	35.6134	38.0563	22.2104	25.7987	26.0679
ENSG00000078403	protein_coding	MLLT10	9.27886	8.95325	9.56475	11.4916	11.5198	12.0717
ENSG00000078487	protein_coding	ZCWPW1	0.917326	2.03186	0.831124	2.62595	2.26795	1.87113
ENSG00000078549	protein_coding	ADCYAP1R1	0	0	0.0336367	0	0.0256149	0
ENSG00000078579	protein_coding	FGF20	0	0	0	0	0	0
ENSG00000078589	protein_coding	P2RY10	0	0	0	0	0	0
ENSG00000078596	protein_coding	ITM2A	2.72067	1.23264	1.90478	1.32754	1.10922	1.85817
ENSG00000078618	protein_coding	NRDC	65.6852	67.4369	76.1043	58.9876	58.2131	59.7541
ENSG00000078668	protein_coding	VDAC3	105.571	118.022	122.741	54.5527	54.1343	60.7931
ENSG00000078674	protein_coding	PCM1	12.3967	11.9887	13.634	8.87174	9.70411	8.51508
ENSG00000078687	protein_coding	TNRC6C	0.958771	0.758449	0.744578	0.653475	0.551259	0.625151
ENSG00000078699	protein_coding	CBFA2T2	6.16869	4.54461	4.64131	6.526	5.29241	6.35689
ENSG00000078725	protein_coding	BRINP1	1.04756	0.435061	1.12708	2.71763	2.57487	3.07823
ENSG00000078747	protein_coding	ITCH	17.5538	20.6592	25.4021	28.0267	29.9203	29.6832
ENSG00000078795	protein_coding	PKD2L2	0	0.0905558	0	0.0780223	0	0.0792643
ENSG00000078804	protein_coding	TP53INP2	23.0638	17.9472	20.2915	40.8298	34.7992	38.8321
ENSG00000078808	protein_coding	SDF4	108.298	135.154	113.862	74.7116	47.8717	53.8003
ENSG00000078814	protein_coding	MYH7B	0.0615259	0	0	0	0.0212251	0.0372768
ENSG00000078898	protein_coding	BPIFB2	0	0	0	0	0	0
ENSG00000078900	protein_coding	TP73	0.299856	0.186799	0.169799	0.295065	0.129305	0.181674
ENSG00000078902	protein_coding	TOLLIP	53.9246	56.6222	57.2306	22.542	19.1878	19.4487
ENSG00000078967	protein_coding	UBE2D4	4.62632	4.73635	4.58149	2.61788	2.70945	2.5031
ENSG00000079101	protein_coding	CLUL1	0	0	0	0	0.0910042	0.0319654
ENSG00000079102	protein_coding	RUNX1T1	0	0	0.0169786	0.0268221	0	0.0136246
ENSG00000079112	protein_coding	CDH17	0	0	0	0	0	0
ENSG00000079134	protein_coding	THOC1	6.51163	7.90498	8.14049	4.39122	5.05434	4.45354
ENSG00000079150	protein_coding	FKBP7	0.658807	0.547216	1.1938	1.41443	0.965915	1.01784
ENSG00000079156	protein_coding	OSBPL6	4.23912	2.45742	2.74055	0.900642	1.2339	1.14506
ENSG00000079215	protein_coding	SLC1A3	2.42912	1.54688	2.05413	1.53559	2.31845	2.01137
ENSG00000079246	protein_coding	XRCC5	212.18	220.049	239.397	124.8	129.065	136.25
ENSG00000079257	protein_coding	LXN	10.7784	13.2847	9.60805	19.1596	20.3908	16.4733
ENSG00000079263	protein_coding	SP140	0	0.226455	0.288184	0.422742	0.407563	0.73781
ENSG00000079277	protein_coding	MKNK1	17.3494	13.9408	16.0608	9.17716	9.08618	10.4963
ENSG00000079308	protein_coding	TNS1	0.654315	0.414084	0.324644	2.10718	1.65531	1.5895
ENSG00000079313	protein_coding	REXO1	27.0962	18.8058	22.614	12.5915	7.40281	8.09823
ENSG00000079332	protein_coding	SAR1A	45.196	56.0671	64.4148	37.5692	41.0546	39.6698
ENSG00000079335	protein_coding	CDC14A	0.623387	0.517796	0.81191	0.474012	0.510756	0.424904
ENSG00000079337	protein_coding	RAPGEF3	3.60368	3.55017	4.06232	5.92268	4.51019	4.90496
ENSG00000079385	protein_coding	CEACAM1	16.5217	15.1032	17.018	17.9339	16.3984	19.6286
ENSG00000079387	protein_coding	SENP1	8.87784	5.72008	6.80321	5.61123	6.38293	5.41904
ENSG00000079393	protein_coding	DUSP13	0	0.716897	0.293244	0.0772092	0.0744369	0
ENSG00000079432	protein_coding	CIC	23.7771	16.066	19.1222	19.712	12.9583	14.9239
ENSG00000079435	protein_coding	LIPE	10.6155	9.0623	8.68284	3.97435	2.17014	2.63219
ENSG00000079459	protein_coding	FDFT1	218.745	224.664	233.255	209.531	217.867	250.42
ENSG00000079462	protein_coding	PAFAH1B3	65.7785	65.9204	60.2451	27.3749	15.1692	18.4105
ENSG00000079482	protein_coding	OPHN1	1.12882	0.833441	1.64776	1.97474	1.62258	1.725
ENSG00000079557	protein_coding	AFM	0	0	0	0	0	0
ENSG00000079616	protein_coding	KIF22	28.1169	24.4293	19.9321	13.2603	9.78091	11.1192
ENSG00000079689	protein_coding	SCGN	0	0	0	0	0	0
ENSG00000079691	protein_coding	CARMIL1	12.5839	9.89908	11.938	22.5674	23.851	24.281
ENSG00000079739	protein_coding	PGM1	39.6916	45.8872	42.7821	43.0979	42.5377	46.0003
ENSG00000079785	protein_coding	DDX1	99.7887	125.868	136.696	63.032	71.5436	72.0859
ENSG00000079805	protein_coding	DNM2	38.7168	33.0678	33.5913	30.3274	24.3307	27.0698
ENSG00000079819	protein_coding	EPB41L2	12.1413	7.75753	9.50844	12.9279	14.736	14.6705
ENSG00000079841	protein_coding	RIMS1	0.0396685	0	0	0.0141945	0.0273696	0
ENSG00000079931	protein_coding	MOXD1	0	0	0.307992	0.0695075	0.134023	0.11769
ENSG00000079950	protein_coding	STX7	7.73908	9.84802	10.9525	5.52743	6.56775	5.72044
ENSG00000079974	protein_coding	RABL2B	9.59254	9.76226	8.22133	7.01956	7.63208	6.95327
ENSG00000079999	protein_coding	KEAP1	43.5867	50.9448	46.823	27.5352	23.3629	25.5994
ENSG00000080007	protein_coding	DDX43	0.186227	0	0	0.133274	0.128488	0.0676976
ENSG00000080031	protein_coding	PTPRH	0.467002	0	0.423118	0.459541	0.362488	0.254649
ENSG00000080166	protein_coding	DCT	0	0	0	0	0	0.0244573
ENSG00000080189	protein_coding	SLC35C2	16.0582	16.5634	15.9803	10.1027	8.35501	9.25072
ENSG00000080200	protein_coding	CRYBG3	4.34324	4.26	5.21192	8.05171	8.27266	6.46104
ENSG00000080224	protein_coding	EPHA6	0	0.133955	0	0.0288537	0	0.019542
ENSG00000080293	protein_coding	SCTR	0	0	0	0	0	0.017942
ENSG00000080298	protein_coding	RFX3	1.31714	0.980864	1.02877	0.552569	0.642407	0.875069
ENSG00000080345	protein_coding	RIF1	3.96532	5.05646	5.68	3.94693	4.21945	4.09774
ENSG00000080371	protein_coding	RAB21	10.2101	11.2113	13.8187	5.71205	5.47424	5.78383
ENSG00000080493	protein_coding	SLC4A4	0.166869	0.508215	0.302376	0.139324	0.115132	0.141541
ENSG00000080503	protein_coding	SMARCA2	7.31118	7.43237	8.71272	7.66294	8.05598	8.03615
ENSG00000080511	protein_coding	RDH8	0	0	0	0	0	0
ENSG00000080546	protein_coding	SESN1	5.64636	13.7408	16.4243	6.91197	6.15118	6.52985
ENSG00000080561	protein_coding	MID2	6.06051	5.03396	6.60404	5.27501	8.08045	6.88728
ENSG00000080572	protein_coding	PIH1D3	0	0	0	0	0	0
ENSG00000080573	protein_coding	COL5A3	0.299149	0.248478	0.135519	0.0267609	0.0773999	0.126872
ENSG00000080603	protein_coding	SRCAP	5.80005	0.802936	2.57698	19.4104	17.4052	17.6605
ENSG00000080608	protein_coding	PUM3	57.5694	78.7689	77.0783	58.9778	61.349	63.9301
ENSG00000080618	protein_coding	CPB2	0	0	0	0	0	0
ENSG00000080644	protein_coding	CHRNA3	0.426197	0.0885016	0.0482684	0.0381262	0.183786	0.206577
ENSG00000080709	protein_coding	KCNN2	0	0	0	0	0	0
ENSG00000080802	protein_coding	CNOT4	10.2196	9.39157	10.5726	17.0911	17.3526	17.8199
ENSG00000080815	protein_coding	PSEN1	24.6832	26.7716	30.6346	24.7451	25.0881	23.5261
ENSG00000080819	protein_coding	CPOX	29.4053	35.9027	40.7638	16.9617	18.7363	19.1204
ENSG00000080822	protein_coding	CLDND1	30.7679	30.7323	34.8899	18.8487	19.3139	16.8599
ENSG00000080823	protein_coding	MOK	3.55549	3.60527	4.12086	2.32971	1.97525	1.96393
ENSG00000080824	protein_coding	HSP90AA1	697.705	842.151	916.727	715.872	790.373	796.303
ENSG00000080839	protein_coding	RBL1	6.5582	3.25426	4.35998	2.01146	1.93923	2.1054
ENSG00000080845	protein_coding	DLGAP4	27.8777	21.9571	24.7089	29.5957	22.5994	25.4718
ENSG00000080854	protein_coding	IGSF9B	0.028373	0	0.0128534	0.142137	0.117457	0.0997043
ENSG00000080910	protein_coding	CFHR2	0	0	0	0	0	0
ENSG00000080986	protein_coding	NDC80	9.42053	7.1135	6.20747	2.1962	2.75747	2.36953
ENSG00000081014	protein_coding	AP4E1	9.65724	8.19336	10.4372	7.30617	7.78153	7.42247
ENSG00000081019	protein_coding	RSBN1	3.27326	5.99378	5.49323	4.17927	3.02832	2.94772
ENSG00000081026	protein_coding	MAGI3	4.58205	3.20499	4.28803	3.62434	2.97423	3.55783
ENSG00000081041	protein_coding	CXCL2	14.1516	19.591	21.6984	72.5816	88.3768	80.2884
ENSG00000081051	protein_coding	AFP	0.158476	0.263265	0.358959	0.170121	0.273354	0.268845
ENSG00000081052	protein_coding	COL4A4	0.101032	0	0.0686534	0.0903798	0.104562	0.171395
ENSG00000081059	protein_coding	TCF7	0.653389	0.333979	0.341532	0.557524	0.381455	0.578579
ENSG00000081087	protein_coding	OSTM1	17.9096	29.04	35.2585	13.2262	11.7325	12.8942
ENSG00000081138	protein_coding	CDH7	0	0	0	0	0	0.0126933
ENSG00000081148	protein_coding	IMPG2	0	0.1009	0.11006	0.0869343	0.356204	0.0735985
ENSG00000081154	protein_coding	PCNP	73.1351	114.714	132.978	44.5899	47.8164	47.2578
ENSG00000081177	protein_coding	EXD2	21.0591	22.8742	23.3732	14.9261	14.5299	14.0841
ENSG00000081181	protein_coding	ARG2	20.6555	21.3999	20.4249	8.18583	9.80742	9.93092
ENSG00000081189	protein_coding	MEF2C	0.258927	0.358449	0.52784	0.216186	0.372184	0.355587
ENSG00000081237	protein_coding	PTPRC	0	0	0	0.0197992	0	0
ENSG00000081248	protein_coding	CACNA1S	0	0	0	0	0	0
ENSG00000081277	protein_coding	PKP1	260.705	209.22	228.955	136.22	125.158	135.963
ENSG00000081307	protein_coding	UBA5	10.3284	14.7509	16.1911	5.23791	5.22927	4.90711
ENSG00000081320	protein_coding	STK17B	15.9926	17.9683	17.9897	4.34031	5.43713	4.74642
ENSG00000081377	protein_coding	CDC14B	3.68051	3.8616	4.6729	1.88884	2.50598	2.805
ENSG00000081386	protein_coding	ZNF510	3.51267	3.8428	2.94971	4.44524	5.82253	4.46409
ENSG00000081479	protein_coding	LRP2	0	0	0.0142657	0	0	0
ENSG00000081665	protein_coding	ZNF506	2.44678	2.65087	3.06022	2.66464	2.62401	2.68772
ENSG00000081692	protein_coding	JMJD4	21.1612	22.1664	20.9302	4.7115	3.56897	3.98875
ENSG00000081721	protein_coding	DUSP12	21.5926	34.1963	38.0836	14.8347	10.3292	13.2567
ENSG00000081760	protein_coding	AACS	13.4735	14.0548	15.073	5.81712	6.01195	6.27763
ENSG00000081791	protein_coding	DELE1	16.0639	17.9076	17.8482	12.1315	9.53756	11.3616
ENSG00000081800	protein_coding	SLC13A1	0	0	0	0	0.0795279	0
ENSG00000081803	protein_coding	CADPS2	0.478191	0.463393	0.433255	0.712957	0.604874	0.685676
ENSG00000081818	protein_coding	PCDHB4	0.266569	0	0.241519	0.0953856	0	0.193808
ENSG00000081842	protein_coding	PCDHA6	0.0826729	0.0686695	0	0.0887478	0.171122	0.23041
ENSG00000081853	protein_coding	PCDHGA2	0.226465	0.313509	0.205184	0.405176	0.625004	0.256123
ENSG00000081870	protein_coding	HSPB11	15.0491	24.2189	24.5003	11.4992	12.9791	10.8464
ENSG00000081913	protein_coding	PHLPP1	4.25957	3.9105	4.21476	4.25169	2.91959	3.11728
ENSG00000081923	protein_coding	ATP8B1	14.6525	13.1299	18.4093	16.9173	18.1525	17.2216
ENSG00000081985	protein_coding	IL12RB2	0.802842	0.952648	0.727398	0.697676	0.474794	0.333544
ENSG00000082014	protein_coding	SMARCD3	4.00126	3.72882	2.87368	4.6794	4.71338	5.20326
ENSG00000082068	protein_coding	WDR70	10.0495	11.2507	10.8866	9.27659	8.91837	9.14188
ENSG00000082074	protein_coding	FYB1	2.86502	4.66429	5.97033	31.8627	32.8535	29.898
ENSG00000082126	protein_coding	MPP4	0.103022	0.256716	0.280023	0.0737282	0	0
ENSG00000082146	protein_coding	STRADB	15.0093	18.8331	18.5899	6.28488	6.7753	7.73931
ENSG00000082153	protein_coding	BZW1	152.592	254.221	292.707	90.7033	98.4422	102.776
ENSG00000082175	protein_coding	PGR	0	0	0	0	0	0
ENSG00000082196	protein_coding	C1QTNF3	0	0	0.257053	0.203041	0.0978753	0.0687578
ENSG00000082212	protein_coding	ME2	8.00954	9.86001	10.3071	7.01092	7.36464	6.43811
ENSG00000082213	protein_coding	C5orf22	15.4167	19.5129	23.1136	9.63197	8.61076	9.68151
ENSG00000082258	protein_coding	CCNT2	5.25101	9.60475	11.5143	9.61464	9.61629	8.63727
ENSG00000082269	protein_coding	FAM135A	3.92833	5.80962	6.70601	3.46273	3.10702	2.78061
ENSG00000082293	protein_coding	COL19A1	0	0	0	0	0	0
ENSG00000082397	protein_coding	EPB41L3	1.82909	2.00268	2.16567	0.565248	0.473247	0.735437
ENSG00000082438	protein_coding	COBLL1	5.99477	4.53783	6.02006	7.49196	8.45564	7.97621
ENSG00000082458	protein_coding	DLG3	6.70359	6.53183	6.71605	9.52571	9.29485	10.2163
ENSG00000082482	protein_coding	KCNK2	0.129739	0	0.0587739	0	0	0
ENSG00000082497	protein_coding	SERTAD4	3.52407	2.542	2.1006	2.32291	2.46345	2.73073
ENSG00000082512	protein_coding	TRAF5	0.674726	1.68132	1.5283	0.744425	0.737092	0.878914
ENSG00000082515	protein_coding	MRPL22	16.4789	20.6516	22.7448	13.7932	15.1597	15.2039
ENSG00000082516	protein_coding	GEMIN5	13.3022	15.2297	16.6532	10.7741	11.8445	12.1654
ENSG00000082556	protein_coding	OPRK1	0	0	0	0	0	0
ENSG00000082641	protein_coding	NFE2L1	193.841	173.828	176.446	340.236	299.938	306.574
ENSG00000082684	protein_coding	SEMA5B	0.297805	0.0494724	0.161892	0.0852502	0.102736	0.0866072
ENSG00000082701	protein_coding	GSK3B	35.2659	36.1118	42.4335	36.2326	39.931	42.7784
ENSG00000082781	protein_coding	ITGB5	47.2632	46.2425	49.171	37.1675	32.905	33.2963
ENSG00000082805	protein_coding	ERC1	14.2207	9.99956	12.5947	20.8523	23.8803	24.503
ENSG00000082898	protein_coding	XPO1	30.4429	45.4225	51.0679	23.5431	22.7868	21.6012
ENSG00000082996	protein_coding	RNF13	28.7483	39.6434	42.6105	15.6301	13.9616	16.0987
ENSG00000083067	protein_coding	TRPM3	0	0	0	0.0182321	0.0175775	0
ENSG00000083093	protein_coding	PALB2	12.3962	14.7346	15.1526	9.48319	9.10581	10.1262
ENSG00000083097	protein_coding	DOP1A	5.35309	6.79539	7.29796	4.93327	4.51222	4.96284
ENSG00000083099	protein_coding	LYRM2	11.169	12.6285	15.338	7.63739	9.48133	8.65178
ENSG00000083123	protein_coding	BCKDHB	7.60112	9.41868	11.9108	3.96836	5.37341	4.33351
ENSG00000083168	protein_coding	KAT6A	4.43343	2.4259	2.98882	6.14261	6.3642	6.67576
ENSG00000083223	protein_coding	TUT7	15.5807	16.8367	20.5239	36.0764	37.599	36.2475
ENSG00000083290	protein_coding	ULK2	4.88364	4.73962	5.82199	3.32944	3.26309	3.29523
ENSG00000083307	protein_coding	GRHL2	27.1533	19.9088	24.0702	20.452	17.8095	19.305
ENSG00000083312	protein_coding	TNPO1	25.1586	33.2104	40.7154	25.613	25.0148	24.9994
ENSG00000083444	protein_coding	PLOD1	98.2142	84.7465	88.8985	91.0324	68.4873	74.1908
ENSG00000083454	protein_coding	P2RX5	0.252003	0.313976	1.08453	0.450867	0.260806	0.458044
ENSG00000083457	protein_coding	ITGAE	4.22606	5.80785	6.05668	2.19956	1.64345	2.12285
ENSG00000083520	protein_coding	DIS3	9.83194	18.472	21.252	11.4423	10.9668	9.95085
ENSG00000083535	protein_coding	PIBF1	8.01162	9.6794	13.8026	3.38801	3.30823	3.7067
ENSG00000083544	protein_coding	TDRD3	4.53914	5.60157	5.72825	5.35995	4.94379	5.57885
ENSG00000083635	protein_coding	NUFIP1	13.1193	13.5609	14.1978	4.79878	5.17963	4.89283
ENSG00000083642	protein_coding	PDS5B	4.30845	3.13134	3.36335	5.90518	5.46754	5.52372
ENSG00000083720	protein_coding	OXCT1	25.3641	26.8229	34.1906	17.1336	19.677	19.0555
ENSG00000083750	protein_coding	RRAGB	4.65396	7.73131	6.83092	10.5914	12.6515	13.2188
ENSG00000083782	protein_coding	EPYC	0	0	0	0	0	0
ENSG00000083799	protein_coding	CYLD	7.6754	7.02586	7.98306	8.5757	8.41637	8.08109
ENSG00000083807	protein_coding	SLC27A5	1.13783	1.31264	0.944996	1.44763	0.741438	1.14896
ENSG00000083812	protein_coding	ZNF324	6.8963	7.58798	8.39862	6.34547	5.62327	5.80617
ENSG00000083814	protein_coding	ZNF671	1.14899	3.45961	2.99294	3.39192	3.51786	3.77658
ENSG00000083817	protein_coding	ZNF416	5.58109	9.60262	7.58494	4.13678	5.56978	4.39585
ENSG00000083828	protein_coding	ZNF586	2.03653	3.7676	3.10322	1.68932	1.7564	1.82838
ENSG00000083838	protein_coding	ZNF446	4.78768	5.03719	4.86795	2.89334	1.06439	1.74043
ENSG00000083844	protein_coding	ZNF264	3.68358	5.00974	5.40957	3.37487	3.54694	3.34521
ENSG00000083845	protein_coding	RPS5	352.867	429.278	391.629	151.458	96.6207	124.91
ENSG00000083857	protein_coding	FAT1	78.2557	55.9567	69.1962	125.504	126.074	126.905
ENSG00000083896	protein_coding	YTHDC1	32.7511	28.5218	31.4708	29.4529	32.0288	30.6473
ENSG00000083937	protein_coding	CHMP2B	32.2549	63.1899	83.0961	13.9316	10.5653	11.1924
ENSG00000084070	protein_coding	SMAP2	25.7796	18.7217	20.0386	15.8785	14.7738	19.5111
ENSG00000084072	protein_coding	PPIE	12.0846	13.5225	14.4403	5.18905	5.53761	6.60338
ENSG00000084073	protein_coding	ZMPSTE24	56.0532	85.521	108.989	25.9162	28.1915	29.1529
ENSG00000084090	protein_coding	STARD7	60.3359	71.0215	80.3331	31.9529	35.2064	41.5552
ENSG00000084092	protein_coding	NOA1	38.4235	45.0232	46.2098	31.5899	24.3013	27.991
ENSG00000084093	protein_coding	REST	6.79933	14.1455	18.7403	12.8243	12.9777	13.2518
ENSG00000084110	protein_coding	HAL	0.197156	0.245641	0.3126	0.0352738	0.136029	0.0716706
ENSG00000084112	protein_coding	SSH1	17.1327	13.3612	14.3688	17.7673	15.5404	17.5005
ENSG00000084207	protein_coding	GSTP1	2499.02	2921.55	2709.86	1367.87	939.688	1131.85
ENSG00000084234	protein_coding	APLP2	338.369	293.363	310.021	310.307	316.353	320.18
ENSG00000084444	protein_coding	FAM234B	2.11682	2.26063	2.02065	2.92162	2.4255	1.7314
ENSG00000084453	protein_coding	SLCO1A2	0	0	0	0	0	0
ENSG00000084463	protein_coding	WBP11	43.3186	32.6956	38.2427	42.6697	38.4084	40.8705
ENSG00000084623	protein_coding	EIF3I	531.395	566.449	529.286	296.113	275.842	316.291
ENSG00000084628	protein_coding	NKAIN1	0	0.253829	0	0.109349	0.0527112	0.129604
ENSG00000084636	protein_coding	COL16A1	38.815	45.0364	42.196	35.4288	23.9626	23.4505
ENSG00000084652	protein_coding	TXLNA	36.9004	34.4402	38.9151	36.4529	33.3645	38.187
ENSG00000084674	protein_coding	APOB	0	0.0284163	0	0	0	0
ENSG00000084676	protein_coding	NCOA1	3.87821	2.92846	3.03462	5.02525	5.04752	5.19069
ENSG00000084693	protein_coding	AGBL5	7.58569	7.73643	8.96082	11.8539	11.892	11.7866
ENSG00000084710	protein_coding	EFR3B	0.810277	0.71262	0.539805	0.119387	0.147986	0.184818
ENSG00000084731	protein_coding	KIF3C	19.6541	14.0211	14.2888	31.6191	25.3165	27.801
ENSG00000084733	protein_coding	RAB10	144.105	220.595	263.641	106.656	100.911	103.559
ENSG00000084734	protein_coding	GCKR	0.966557	0.267613	0.218932	0.17293	0.0555735	0.0976015
ENSG00000084754	protein_coding	HADHA	164.916	172.201	179.133	182.357	183.689	186.026
ENSG00000084764	protein_coding	MAPRE3	18.0373	16.0273	18.3059	18.5121	15.2427	17.1633
ENSG00000084774	protein_coding	CAD	26.4966	23.905	25.7759	13.0501	10.5088	10.7679
ENSG00000085063	protein_coding	CD59	209.411	250.765	258.311	155.293	161.341	166.751
ENSG00000085117	protein_coding	CD82	102.989	67.9136	69.4709	107.231	75.5637	84.0848
ENSG00000085185	protein_coding	BCORL1	5.51944	3.21445	4.13857	9.82962	8.44803	9.46334
ENSG00000085224	protein_coding	ATRX	5.6347	5.86128	7.4431	9.96818	9.86459	9.91947
ENSG00000085231	protein_coding	AK6	18.9638	41.1512	41.0214	9.58488	7.93229	9.62255
ENSG00000085265	protein_coding	FCN1	0	0	0	0	0	0
ENSG00000085274	protein_coding	MYNN	6.19715	7.94179	9.46495	4.59341	4.12306	4.70944
ENSG00000085276	protein_coding	MECOM	6.19036	6.00638	6.17944	6.07677	6.97359	7.97908
ENSG00000085365	protein_coding	SCAMP1	10.678	17.1765	24.3909	11.8394	10.9214	11.3262
ENSG00000085377	protein_coding	PREP	39.3673	35.1563	37.5235	27.6441	30.6747	30.2487
ENSG00000085382	protein_coding	HACE1	1.59263	2.46327	2.04006	0.903959	1.43987	1.24443
ENSG00000085415	protein_coding	SEH1L	10.4544	10.6133	12.5416	3.44645	4.79203	4.62736
ENSG00000085433	protein_coding	WDR47	26.8378	34.2001	39.0197	21.4638	22.434	23.7789
ENSG00000085449	protein_coding	WDFY1	19.6069	28.7306	34.9422	32.9613	33.8835	36.0636
ENSG00000085465	protein_coding	OVGP1	1.61042	1.17043	0.820735	2.305	3.12502	3.976
ENSG00000085491	protein_coding	SLC25A24	19.0061	26.186	35.9776	18.9723	17.2764	18.5432
ENSG00000085511	protein_coding	MAP3K4	9.77875	8.1224	8.67653	10.1836	10.26	10.0842
ENSG00000085514	protein_coding	PILRA	0	0	0.11548	0.456078	0.439701	0.494227
ENSG00000085552	protein_coding	IGSF9	23.0061	21.3948	21.5021	9.13475	5.56354	7.11293
ENSG00000085563	protein_coding	ABCB1	0	0	0	0	0	0
ENSG00000085644	protein_coding	ZNF213	4.48852	3.79365	4.28077	4.6211	2.93389	3.20611
ENSG00000085662	protein_coding	AKR1B1	53.8657	57.7722	52.5145	34.575	26.6285	29.4057
ENSG00000085719	protein_coding	CPNE3	42.0162	56.7896	63.8558	26.4047	23.2746	27.555
ENSG00000085721	protein_coding	RRN3	34.0547	50.6925	59.995	15.9855	15.0747	14.7757
ENSG00000085733	protein_coding	CTTN	154.761	169.78	186.285	138.81	123.551	133.642
ENSG00000085741	protein_coding	WNT11	0	0	0.0969236	0.0765579	0.073809	0.103702
ENSG00000085760	protein_coding	MTIF2	38.1889	49.7036	49.3803	33.1942	37.2928	36.0363
ENSG00000085788	protein_coding	DDHD2	13.995	13.2623	15.8607	10.6695	11.398	12.0048
ENSG00000085831	protein_coding	TTC39A	1.02952	1.8903	1.42371	1.43478	1.36457	1.3263
ENSG00000085832	protein_coding	EPS15	15.4701	19.4745	23.018	12.4244	12.1206	14.8133
ENSG00000085840	protein_coding	ORC1	10.0774	4.05021	2.87165	1.51217	1.51395	1.98924
ENSG00000085871	protein_coding	MGST2	33.904	43.4374	42.2373	19.4566	24.0544	23.5064
ENSG00000085872	protein_coding	CHERP	36.6862	25.3584	25.5977	13.7912	8.02998	9.45291
ENSG00000085978	protein_coding	ATG16L1	22.3986	17.4201	22.84	14.5587	14.7884	15.7562
ENSG00000085982	protein_coding	USP40	14.4829	12.1199	12.3602	12.131	10.7411	10.0696
ENSG00000085998	protein_coding	POMGNT1	27.8681	24.6455	25.9919	19.5626	17.814	17.0533
ENSG00000085999	protein_coding	RAD54L	9.57838	2.89308	3.3248	1.29084	1.2874	1.22095
ENSG00000086015	protein_coding	MAST2	15.9823	12.9093	13.9959	12.406	10.2022	11.2234
ENSG00000086061	protein_coding	DNAJA1	196.03	220.154	251.339	154.509	164.834	174.041
ENSG00000086062	protein_coding	B4GALT1	232.681	188.11	212.972	316.001	317.473	304.726
ENSG00000086065	protein_coding	CHMP5	110.749	161.247	189.919	77.8914	86.5125	98.4385
ENSG00000086102	protein_coding	NFX1	18.8119	13.9745	18.1696	20.6514	22.1139	21.4704
ENSG00000086159	protein_coding	AQP6	0.0989045	0	0.0896104	0	0	0.0719081
ENSG00000086189	protein_coding	DIMT1	16.1381	23.3897	26.9307	6.27553	6.84552	6.64481
ENSG00000086200	protein_coding	IPO11	7.66977	9.16478	10.8807	4.50186	4.68836	5.1768
ENSG00000086205	protein_coding	FOLH1	0	0.0789796	0.215376	0.374266	0.426432	0.24196
ENSG00000086232	protein_coding	EIF2AK1	78.1427	63.8326	67.4103	53.8409	54.8711	56.6678
ENSG00000086288	protein_coding	NME8	0	0	0.188752	0.223637	0.287476	0.0757324
ENSG00000086289	protein_coding	EPDR1	11.8609	7.72992	9.09303	10.186	7.99465	9.81742
ENSG00000086300	protein_coding	SNX10	4.32588	7.30607	10.2557	0.980346	1.39285	0.838696
ENSG00000086475	protein_coding	SEPHS1	40.3579	39.5971	40.4704	19.0679	19.5096	20.0678
ENSG00000086504	protein_coding	MRPL28	78.2605	91.5032	90.9287	42.4515	28.6605	31.8522
ENSG00000086506	protein_coding	HBQ1	0.96076	1.59605	0.435238	0.343786	0	0.232839
ENSG00000086544	protein_coding	ITPKC	79.0373	72.639	81.4803	63.9295	48.5711	48.5055
ENSG00000086548	protein_coding	CEACAM6	183.452	230.064	243.022	197.3	170.62	194.764
ENSG00000086570	protein_coding	FAT2	35.4542	20.7533	21.9262	54.5793	51.524	51.3084
ENSG00000086589	protein_coding	RBM22	33.0928	32.7735	36.5178	23.4806	28.5407	27.7444
ENSG00000086598	protein_coding	TMED2	231.208	269.545	303.73	130.516	131.673	133.892
ENSG00000086619	protein_coding	ERO1B	1.48994	1.23757	1.70726	1.37989	1.84434	1.74171
ENSG00000086666	protein_coding	ZFAND6	24.2172	44.8095	56.9943	14.6892	14.9089	15.5075
ENSG00000086696	protein_coding	HSD17B2	0.798533	1.98982	1.42287	1.18104	1.28556	1.31596
ENSG00000086712	protein_coding	TXLNG	25.1648	27.5229	34.6643	19.1909	19.8767	20.5864
ENSG00000086717	protein_coding	PPEF1	0	0	0	0.103341	0	0
ENSG00000086730	protein_coding	LAT2	0.669678	0.741661	0.65731	0.599072	0.693074	0.649182
ENSG00000086758	protein_coding	HUWE1	45.6813	30.7913	37.0778	68.883	67.1648	70.6055
ENSG00000086827	protein_coding	ZW10	30.0959	34.9685	36.5672	14.3796	13.2631	14.1236
ENSG00000086848	protein_coding	ALG9	9.74332	9.76377	10.3085	7.1303	8.19708	7.53324
ENSG00000086967	protein_coding	MYBPC2	0	0	0	0	0.047056	0
ENSG00000086991	protein_coding	NOX4	0.332698	0.207258	0.0753585	0.0892862	0.0286934	0.0201572
ENSG00000087008	protein_coding	ACOX3	15.1683	13.9137	15.1172	6.60755	4.45921	6.48897
ENSG00000087053	protein_coding	MTMR2	20.394	30.5051	34.2512	12.9932	13.07	13.0694
ENSG00000087074	protein_coding	PPP1R15A	179.41	105.855	103.619	124.309	120.702	109.662
ENSG00000087076	protein_coding	HSD17B14	5.01807	4.92593	7.85307	6.36622	3.61963	3.3167
ENSG00000087077	protein_coding	TRIP6	133.725	157.452	153.924	50.2679	32.697	37.0791
ENSG00000087085	protein_coding	ACHE	0.622584	0	0.451263	0.49011	0.558423	0.331941
ENSG00000087086	protein_coding	FTL	4664.54	4278.39	4067.91	5003.13	4476.09	4744.37
ENSG00000087087	protein_coding	SRRT	72.0511	65.9182	60.3134	51.4515	43.4801	48.9933
ENSG00000087088	protein_coding	BAX	78.8276	91.8612	85.6331	59.8514	54.1847	58.4281
ENSG00000087095	protein_coding	NLK	9.25424	11.4859	13.5889	5.48096	5.39425	6.41891
ENSG00000087111	protein_coding	PIGS	17.2732	14.6329	15.4164	15.2214	11.2359	12.8916
ENSG00000087116	protein_coding	ADAMTS2	0	0.0481275	0	0	0	0
ENSG00000087128	protein_coding	TMPRSS11E	38.2133	52.372	56.2613	11.7081	11.123	8.68213
ENSG00000087152	protein_coding	ATXN7L3	35.503	38.9482	41.1838	19.0045	16.9026	18.2866
ENSG00000087157	protein_coding	PGS1	9.32723	13.1622	12.0855	7.60815	5.95101	7.04869
ENSG00000087191	protein_coding	PSMC5	97.0936	89.4114	92.3734	69.3157	80.732	74.5707
ENSG00000087206	protein_coding	UIMC1	14.6853	16.7058	16.8727	13.5178	16.1161	16.5053
ENSG00000087237	protein_coding	CETP	0	0	0	0	0	0
ENSG00000087245	protein_coding	MMP2	40.2074	26.3236	28.6158	66.0349	58.3833	56.2577
ENSG00000087250	protein_coding	MT3	0	0	0	0	0	0
ENSG00000087253	protein_coding	LPCAT2	13.2316	13.8525	15.9531	8.45822	9.39077	9.83712
ENSG00000087258	protein_coding	GNAO1	0.0749197	0.0311148	0.0339397	0.134041	0.0387685	0.004539
ENSG00000087263	protein_coding	OGFOD1	34.0587	38.2786	42.5493	21.673	22.4089	26.73
ENSG00000087266	protein_coding	SH3BP2	9.91382	8.77952	9.1143	14.1376	12.3223	11.9202
ENSG00000087269	protein_coding	NOP14	59.7221	55.1706	59.663	53.2979	56.8913	55.7698
ENSG00000087274	protein_coding	ADD1	39.6176	34.4679	37.7363	34.1849	32.4811	33.8647
ENSG00000087299	protein_coding	L2HGDH	3.78914	4.62464	5.3598	2.90541	3.44133	3.79499
ENSG00000087301	protein_coding	TXNDC16	1.82205	1.86953	1.69939	0.728683	0.258823	0.675346
ENSG00000087302	protein_coding	RTRAF	49.2161	55.6249	61.7289	56.6001	61.3676	57.4714
ENSG00000087303	protein_coding	NID2	1.98405	1.18655	1.15047	0.340774	0.602319	0.634697
ENSG00000087338	protein_coding	GMCL1	5.91068	6.02922	7.42218	4.71237	4.18543	4.79994
ENSG00000087365	protein_coding	SF3B2	77.5811	71.1509	70.3377	66.14	62.6752	66.5778
ENSG00000087448	protein_coding	KLHL42	13.7609	10.4867	13.7992	5.78451	5.71507	6.28131
ENSG00000087460	protein_coding	GNAS	275.643	209.263	203.178	98.7863	87.816	94.905
ENSG00000087470	protein_coding	DNM1L	39.4289	46.2902	47.8736	24.5033	26.5073	26.6407
ENSG00000087494	protein_coding	PTHLH	786.621	782.201	787.144	647.177	655.856	670.441
ENSG00000087495	protein_coding	PHACTR3	4.40536	3.59012	4.40558	1.84404	1.49108	1.55109
ENSG00000087502	protein_coding	ERGIC2	21.5938	28.6401	33.9226	13.3351	15.3794	12.9459
ENSG00000087510	protein_coding	TFAP2C	17.918	18.5335	22.7432	13.065	12.1294	11.6343
ENSG00000087586	protein_coding	AURKA	40.0212	22.0176	26.6066	15.1266	15.6593	17.8026
ENSG00000087589	protein_coding	CASS4	0.100075	0.249372	0	0.286477	0.27619	0.27891
ENSG00000087842	protein_coding	PIR	18.9827	29.1863	29.0002	15.5361	18.3918	15.0492
ENSG00000087884	protein_coding	AAMDC	12.2708	13.6621	14.4294	8.68824	9.36702	10.8829
ENSG00000087903	protein_coding	RFX2	2.73332	2.085	1.92052	0.938134	1.0584	1.16261
ENSG00000087995	protein_coding	METTL2A	15.5762	14.8017	19.6737	10.2969	10.1094	12.2683
ENSG00000088002	protein_coding	SULT2B1	46.7375	35.6854	45.44	5.14582	3.84482	6.07724
ENSG00000088035	protein_coding	ALG6	4.34522	6.75767	8.79519	1.12478	1.05249	0.806597
ENSG00000088038	protein_coding	CNOT3	17.9977	14.8256	15.7674	22.5934	18.4725	18.312
ENSG00000088053	protein_coding	GP6	0	0.155885	0	0.201464	0.129487	0.0682236
ENSG00000088179	protein_coding	PTPN4	1.452	2.09472	2.47531	1.29891	1.27863	1.25013
ENSG00000088205	protein_coding	DDX18	34.5637	37.4515	43.795	17.9008	21.9424	20.7916
ENSG00000088247	protein_coding	KHSRP	91.8287	78.583	83.8038	55.7326	43.8749	48.8469
ENSG00000088256	protein_coding	GNA11	43.2622	43.7782	39.3796	26.4553	19.8251	21.3896
ENSG00000088280	protein_coding	ASAP3	3.55951	3.21001	4.10038	4.1122	3.22777	3.13016
ENSG00000088298	protein_coding	EDEM2	49.8126	38.2441	45.0097	22.3526	24.7082	24.3398
ENSG00000088305	protein_coding	DNMT3B	1.86259	2.09313	1.14158	0.862509	1.73867	1.30108
ENSG00000088320	protein_coding	REM1	0	0	0	0	0	0
ENSG00000088325	protein_coding	TPX2	52.0649	31.3241	34.4231	22.8598	24.3691	24.8435
ENSG00000088356	protein_coding	PDRG1	42.7703	63.5156	65.1723	16.8812	13.5923	14.4486
ENSG00000088367	protein_coding	EPB41L1	3.82715	4.09337	3.70501	10.693	9.29626	10.2089
ENSG00000088386	protein_coding	SLC15A1	0.240989	0.100085	0.163757	0.0431161	0.20784	0.0292016
ENSG00000088387	protein_coding	DOCK9	16.5031	13.3949	15.34	17.2502	15.8748	16.7323
ENSG00000088448	protein_coding	ANKRD10	12.7849	10.9887	10.8784	6.52402	6.40482	5.90042
ENSG00000088451	protein_coding	TGDS	9.07621	14.0944	17.6086	3.45952	4.62858	4.47094
ENSG00000088538	protein_coding	DOCK3	0.0559357	0.603995	0.557473	0.760582	0.501712	0.93536
ENSG00000088543	protein_coding	C3orf18	3.90938	2.20809	2.12521	1.28697	2.21179	1.89487
ENSG00000088682	protein_coding	COQ9	34.8837	33.7553	33.6807	21.8966	22.1233	22.7006
ENSG00000088726	protein_coding	TMEM40	221.253	204.224	206.735	99.8712	98.249	120.832
ENSG00000088727	protein_coding	KIF9	2.08115	2.08878	2.27842	1.48939	1.34616	1.77578
ENSG00000088756	protein_coding	ARHGAP28	0.0425929	0.0353784	0.0578856	0.0609635	0.0587745	0
ENSG00000088766	protein_coding	CRLS1	15.501	30.5399	34.8969	2.5366	3.03244	2.69151
ENSG00000088782	protein_coding	DEFB127	0	0	0	0	0	0
ENSG00000088808	protein_coding	PPP1R13B	8.58451	4.70961	4.75311	8.36204	7.03807	7.82093
ENSG00000088812	protein_coding	ATRN	28.7446	20.7051	24.419	31.9536	31.8637	30.8924
ENSG00000088826	protein_coding	SMOX	9.12624	9.58278	10.2968	5.91508	4.27701	5.52933
ENSG00000088827	protein_coding	SIGLEC1	0	0	0	0	0	0
ENSG00000088832	protein_coding	FKBP1A	661.021	715.014	770.389	307.885	285.557	331.51
ENSG00000088833	protein_coding	NSFL1C	55.6137	58.6454	56.7917	38.077	35.2092	38.3725
ENSG00000088836	protein_coding	SLC4A11	27.6015	27.5116	27.1893	19.501	15.6403	16.6803
ENSG00000088854	protein_coding	C20orf194	8.01814	7.94267	8.17948	9.11739	9.52763	10.6012
ENSG00000088876	protein_coding	ZNF343	11.5813	10.1641	9.89902	14.9735	14.0589	15.2648
ENSG00000088881	protein_coding	EBF4	0.136476	0.113359	0.185477	0.0976696	0.0941625	0.0992243
ENSG00000088882	protein_coding	CPXM1	0	0	0	0	0	0
ENSG00000088888	protein_coding	MAVS	27.7537	27.9926	31.6273	33.6637	32.4401	32.7061
ENSG00000088899	protein_coding	LZTS3	7.33419	5.38899	4.98374	6.7628	4.4764	5.71968
ENSG00000088926	protein_coding	F11	0	0	0	0	0	0
ENSG00000088930	protein_coding	XRN2	66.536	66.5169	77.6134	76.8579	73.7901	77.8469
ENSG00000088970	protein_coding	KIZ	5.74795	8.8204	9.31228	4.28785	4.63802	4.53318
ENSG00000088986	protein_coding	DYNLL1	419.879	463.765	446.988	260.976	215.244	245.71
ENSG00000088992	protein_coding	TESC	0	0.218773	0	0	0	0.0319156
ENSG00000089006	protein_coding	SNX5	36.3574	46.0403	49.0067	16.5017	15.5791	16.2929
ENSG00000089009	protein_coding	RPL6	1004.98	1124.22	1034.93	466.43	508.239	513.734
ENSG00000089012	protein_coding	SIRPG	0	0	0	0	0	0
ENSG00000089022	protein_coding	MAPKAPK5	7.49477	7.2986	6.8741	5.4165	4.99275	4.84955
ENSG00000089041	protein_coding	P2RX7	0.0914679	0.0759748	0.124309	0.0327297	0.126218	0.0443343
ENSG00000089048	protein_coding	ESF1	25.0801	23.1903	26.8678	24.3831	27.2079	25.8225
ENSG00000089050	protein_coding	RBBP9	17.0282	16.1175	19.1355	13.7922	11.1567	12.0284
ENSG00000089053	protein_coding	ANAPC5	27.7248	32.687	35.9733	12.4379	10.7636	11.3923
ENSG00000089057	protein_coding	SLC23A2	10.515	6.38249	8.58031	5.11321	5.99924	5.34162
ENSG00000089060	protein_coding	SLC8B1	8.39472	9.83663	8.96406	8.87748	6.74871	7.10241
ENSG00000089063	protein_coding	TMEM230	71.1624	84.9342	90.8377	37.3628	37.2257	41.4229
ENSG00000089091	protein_coding	DZANK1	1.45616	2.10073	1.42348	1.67286	1.53347	2.00595
ENSG00000089094	protein_coding	KDM2B	5.24697	5.78005	5.93395	2.99602	2.27224	2.89491
ENSG00000089101	protein_coding	CFAP61	0	0	0.0314028	0.0496089	0	0.0167995
ENSG00000089116	protein_coding	LHX5	1.15931	0.550253	0.900316	0.829665	0.228536	0.321094
ENSG00000089123	protein_coding	TASP1	10.3312	14.2537	14.1199	5.82715	6.82607	7.89321
ENSG00000089127	protein_coding	OAS1	4.31204	6.13998	6.41838	9.36801	9.27956	10.1392
ENSG00000089154	protein_coding	GCN1	46.9471	45.1453	46.7938	42.843	36.6307	40.3369
ENSG00000089157	protein_coding	RPLP0	1595.11	1705.08	1577.93	1417.33	1247.61	1344.67
ENSG00000089159	protein_coding	PXN	166.192	123.809	138.777	134.314	110.795	124.068
ENSG00000089163	protein_coding	SIRT4	2.90587	2.06885	2.6328	1.48542	1.43209	1.30786
ENSG00000089169	protein_coding	RPH3A	0	0	0	0	0	0
ENSG00000089177	protein_coding	KIF16B	11.1693	8.73164	10.0006	13.6592	14.8913	14.1234
ENSG00000089195	protein_coding	TRMT6	23.7348	32.3006	34.4435	23.7035	24.1939	26.9406
ENSG00000089199	protein_coding	CHGB	0.342218	0.189501	0.620119	0.449001	0.393526	0.580552
ENSG00000089220	protein_coding	PEBP1	470.76	540.193	512.13	260.769	255.798	271.416
ENSG00000089225	protein_coding	TBX5	0	0	0	0	0	0
ENSG00000089234	protein_coding	BRAP	18.8487	22.6244	23.79	15.9843	15.7862	19.46
ENSG00000089248	protein_coding	ERP29	105.649	93.1434	88.7115	120.794	121.565	111.851
ENSG00000089250	protein_coding	NOS1	3.55905	4.53071	4.53898	2.68548	1.96181	3.01886
ENSG00000089280	protein_coding	FUS	93.2869	74.8632	69.4356	32.2861	31.8926	36.2552
ENSG00000089289	protein_coding	IGBP1	59.6001	80.2476	78.0403	58.0393	62.9028	64.3385
ENSG00000089327	protein_coding	FXYD5	351.077	169.472	172.412	445.817	408.336	437.233
ENSG00000089335	protein_coding	ZNF302	2.62109	4.2705	4.70389	2.5251	2.53877	2.34542
ENSG00000089351	protein_coding	GRAMD1A	16.9037	18.3661	16.5915	12.7693	8.04027	9.20697
ENSG00000089356	protein_coding	FXYD3	291.223	573.899	516.201	260.627	266.438	282.033
ENSG00000089472	protein_coding	HEPH	0	0.0592375	0.0646157	0.102077	0	0.0345674
ENSG00000089486	protein_coding	CDIP1	30.1473	29.3786	32.8524	30.7486	25.8366	28.3473
ENSG00000089505	protein_coding	CMTM1	0.692534	0.57523	0.313728	0.991229	0.716728	0.503504
ENSG00000089558	protein_coding	KCNH4	0	0	0	0	0	0
ENSG00000089597	protein_coding	GANAB	208.762	150.951	158.214	211.904	194.937	191.386
ENSG00000089639	protein_coding	GMIP	13.6	13.5557	16.6963	8.71096	8.53893	9.57473
ENSG00000089682	protein_coding	RBM41	4.48995	7.04448	6.13971	8.06288	7.40047	7.75799
ENSG00000089685	protein_coding	BIRC5	18.6158	9.16712	10.903	6.2806	5.59637	5.75219
ENSG00000089692	protein_coding	LAG3	0.165995	0	0.150396	0	0.0572648	0.0402287
ENSG00000089693	protein_coding	MLF2	220.166	213.743	204.157	188.864	151.165	166.054
ENSG00000089723	protein_coding	OTUB2	7.77488	13.512	14.793	18.6184	19.7655	21.2628
ENSG00000089737	protein_coding	DDX24	55.5198	51.9413	53.7735	64.7875	70.8381	72.0822
ENSG00000089775	protein_coding	ZBTB25	2.57187	2.13624	2.42415	1.72182	1.55983	1.4024
ENSG00000089818	protein_coding	NECAP1	9.701	13.6695	14.5182	9.25674	9.50205	11.0204
ENSG00000089820	protein_coding	ARHGAP4	0.181821	0.0755119	0.411838	0.260242	0.125449	0.176256
ENSG00000089847	protein_coding	ANKRD24	0	0.0941789	0.102729	0.527435	0.352036	0.398439
ENSG00000089876	protein_coding	DHX32	37.0929	44.7658	49.9425	21.366	21.7135	20.5942
ENSG00000089902	protein_coding	RCOR1	31.1783	27.4606	35.1808	17.0128	18.0393	19.128
ENSG00000089916	protein_coding	GPATCH2L	3.23006	3.67947	4.30618	5.74599	5.50783	6.14499
ENSG00000090006	protein_coding	LTBP4	27.216	32.2201	29.5618	19.0966	12.6912	13.2749
ENSG00000090013	protein_coding	BLVRB	124.855	133.747	118.821	106.683	74.9695	83.8012
ENSG00000090020	protein_coding	SLC9A1	49.6227	31.8993	35.9083	38.1497	30.5087	33.2104
ENSG00000090054	protein_coding	SPTLC1	36.1398	42.3103	50.3858	33.6673	38.0472	34.3636
ENSG00000090060	protein_coding	PAPOLA	25.0155	31.8022	38.1856	26.3734	27.5614	27.6786
ENSG00000090061	protein_coding	CCNK	24.9321	22.5544	25.2171	29.679	30.572	30.9441
ENSG00000090097	protein_coding	PCBP4	41.527	31.675	27.7882	27.0482	21.723	20.6214
ENSG00000090104	protein_coding	RGS1	0	0	0	0	0	0
ENSG00000090238	protein_coding	YPEL3	18.4988	20.3989	20.0114	10.7279	7.9771	9.46873
ENSG00000090263	protein_coding	MRPS33	23.0187	28.0369	27.3401	11.213	11.1774	12.3408
ENSG00000090266	protein_coding	NDUFB2	41.5225	53.1551	48.2143	11.9189	9.12981	10.9614
ENSG00000090273	protein_coding	NUDC	172.953	182.864	173.565	112.43	99.2984	107.485
ENSG00000090316	protein_coding	MAEA	24.535	27.4154	29.9045	14.7492	11.5824	11.8357
ENSG00000090339	protein_coding	ICAM1	6.47343	7.45439	9.06426	126.558	117.141	110.014
ENSG00000090372	protein_coding	STRN4	40.9173	35.09	36.5306	22.8889	17.232	18.271
ENSG00000090376	protein_coding	IRAK3	0.733065	0.521911	0.901385	2.92289	2.33022	1.85906
ENSG00000090382	protein_coding	LYZ	0	0.244406	0	0	0	0.142621
ENSG00000090402	protein_coding	SI	0	0	0	0	0	0
ENSG00000090432	protein_coding	MUL1	67.9021	73.0606	81.1135	43.0621	42.6691	42.2286
ENSG00000090447	protein_coding	TFAP4	2.19239	2.4102	2.5706	1.15367	1.00102	0.836053
ENSG00000090470	protein_coding	PDCD7	18.3468	19.2769	19.109	17.0016	15.1469	17.4813
ENSG00000090487	protein_coding	SPG21	33.7508	39.8823	43.5033	12.9428	15.5098	14.9391
ENSG00000090512	protein_coding	FETUB	0	0.41636	0	0	0.259389	0.121481
ENSG00000090520	protein_coding	DNAJB11	56.5613	59.7001	68.8896	18.1487	19.6651	19.285
ENSG00000090530	protein_coding	P3H2	6.73584	7.48507	9.48418	9.08734	9.60889	9.51877
ENSG00000090534	protein_coding	THPO	0	0	0	0	0	0
ENSG00000090539	protein_coding	CHRD	0	0	0	0.0274198	0	0
ENSG00000090554	protein_coding	FLT3LG	0.891218	0.592208	0.242241	0.829145	0.614902	0.604759
ENSG00000090565	protein_coding	RAB11FIP3	15.0885	12.1307	15.0596	13.9741	9.49187	10.9798
ENSG00000090581	protein_coding	GNPTG	35.8095	39.2127	35.0266	15.8729	12.9947	13.5731
ENSG00000090612	protein_coding	ZNF268	2.62728	2.9894	3.42385	2.21506	2.59491	2.22415
ENSG00000090615	protein_coding	GOLGA3	21.5051	25.6823	28.9449	21.8712	18.514	20.1868
ENSG00000090621	protein_coding	PABPC4	90.2814	96.4236	99.4515	76.8953	77.4113	79.4426
ENSG00000090659	protein_coding	CD209	0	0	0	0	0	0
ENSG00000090661	protein_coding	CERS4	0.999815	1.03808	1.69849	2.72793	2.93178	2.10501
ENSG00000090674	protein_coding	MCOLN1	14.2264	13.7329	12.9476	7.01677	5.1731	5.42012
ENSG00000090686	protein_coding	USP48	15.1164	13.887	16.8174	20.9864	23.3838	22.1813
ENSG00000090776	protein_coding	EFNB1	181.995	183.698	187.365	140.687	99.9249	114.397
ENSG00000090857	protein_coding	PDPR	11.2349	7.99299	10.0464	10.2776	9.65581	10.601
ENSG00000090861	protein_coding	AARS1	62.4797	44.3089	50.2732	46.2474	48.2051	46.5599
ENSG00000090863	protein_coding	GLG1	42.0967	34.2794	35.7306	36.2626	35.9403	35.8946
ENSG00000090889	protein_coding	KIF4A	10.4274	4.1463	4.573	3.49304	4.43913	4.05943
ENSG00000090905	protein_coding	TNRC6A	11.7354	10.04	11.7136	13.8295	14.291	13.7178
ENSG00000090924	protein_coding	PLEKHG2	13.0215	6.56347	8.14253	12.8433	11.5183	12.7106
ENSG00000090932	protein_coding	DLL3	2.3252	1.93135	3.16005	0.13867	0.534763	0.140877
ENSG00000090971	protein_coding	NAT14	18.4559	17.8848	18.2312	7.06263	4.8636	4.87656
ENSG00000090975	protein_coding	PITPNM2	5.3159	4.69145	5.04213	3.78453	3.51492	3.13353
ENSG00000090989	protein_coding	EXOC1	23.0625	34.9364	37.937	19.684	19.0098	19.5965
ENSG00000091009	protein_coding	RBM27	13.626	14.7955	18.9666	9.58803	10.7406	11.0597
ENSG00000091010	protein_coding	POU4F3	0.394005	0	0.089245	0.352464	0	0.14323
ENSG00000091039	protein_coding	OSBPL8	10.203	15.3004	21.5865	9.68969	8.90417	9.17564
ENSG00000091073	protein_coding	DTX2	20.1222	25.7393	24.8402	58.4662	38.4919	38.2325
ENSG00000091106	protein_coding	NLRC4	0.66959	0.778642	0.667335	0.191678	0.184795	0.178502
ENSG00000091127	protein_coding	PUS7	19.1103	20.6258	24.4684	11.4652	10.5009	11.5368
ENSG00000091128	protein_coding	LAMB4	0.072252	0.120027	0.163656	0.0775611	0.0249254	0.0875508
ENSG00000091129	protein_coding	NRCAM	0.369738	0.563037	0.390826	1.16867	1.36055	1.17981
ENSG00000091136	protein_coding	LAMB1	102.374	95.2645	105.252	104.364	105.69	107.442
ENSG00000091137	protein_coding	SLC26A4	0.0904728	0.225445	0.081971	0.0647472	0	0.164445
ENSG00000091138	protein_coding	SLC26A3	0	0	0	0	0	0
ENSG00000091140	protein_coding	DLD	27.4421	52.9379	62.834	38.3886	38.5195	38.3371
ENSG00000091157	protein_coding	WDR7	2.7798	2.65798	2.84072	2.82214	2.97727	2.98456
ENSG00000091164	protein_coding	TXNL1	17.8269	23.7216	26.0177	10.2513	9.82125	10.1043
ENSG00000091181	protein_coding	IL5RA	0	0	0	0	0	0
ENSG00000091262	protein_coding	ABCC6	0.268084	0.389681	0.182169	0.239819	0.346812	0.430424
ENSG00000091317	protein_coding	CMTM6	81.9383	112.194	124.108	50.0742	47.8224	43.7792
ENSG00000091409	protein_coding	ITGA6	397.509	473.79	598.009	284.803	289.86	291.911
ENSG00000091428	protein_coding	RAPGEF4	0.711974	0.354826	0.419295	0.636908	0.3193	0.41411
ENSG00000091436	protein_coding	MAP3K20	12.4946	10.6835	13.2183	8.90237	10.1801	10.518
ENSG00000091482	protein_coding	SMPX	0	0	0.347139	0	0.132176	0
ENSG00000091483	protein_coding	FH	100.414	133.567	126.812	46.6932	46.7323	48.4122
ENSG00000091490	protein_coding	SEL1L3	27.0487	24.832	27.6393	37.7204	38.1434	35.0761
ENSG00000091513	protein_coding	TF	0	0.0161824	0.0176516	0.0487991	0.0403259	0.0330506
ENSG00000091527	protein_coding	CDV3	99.2027	138.651	161.396	98.0543	105.954	105.569
ENSG00000091536	protein_coding	MYO15A	0.101456	0.0632035	0.0919223	0.0544557	0.0875005	0.0706899
ENSG00000091542	protein_coding	ALKBH5	57.4759	55.8142	66.8166	64.875	61.0876	60.7866
ENSG00000091583	protein_coding	APOH	0	0	0	0	0	0
ENSG00000091592	protein_coding	NLRP1	19.0198	19.6936	21.9537	21.4584	21.6317	22.2946
ENSG00000091622	protein_coding	PITPNM3	6.27506	6.51521	6.74062	8.114	7.57666	8.79616
ENSG00000091640	protein_coding	SPAG7	40.5679	45.5356	44.2889	48.1914	41.796	41.5406
ENSG00000091651	protein_coding	ORC6	22.8388	11.1475	11.1996	2.52753	1.34023	2.56777
ENSG00000091656	protein_coding	ZFHX4	0.448043	0.132912	0.347949	0.469515	0.728665	0.597205
ENSG00000091664	protein_coding	SLC17A6	0	0	0.0497954	0	0	0
ENSG00000091704	protein_coding	CPA1	0	0	0	0.0639827	0	0
ENSG00000091732	protein_coding	ZC3HC1	18.707	20.0179	21.1482	8.32213	8.95354	7.20888
ENSG00000091831	protein_coding	ESR1	0.0732325	0.182484	0.116114	0.144125	0.164214	0.0976128
ENSG00000091844	protein_coding	RGS17	0.51163	1.06242	1.6514	0.137306	0.463316	0.503721
ENSG00000091879	protein_coding	ANGPT2	0.0748755	0	0.135679	0.0535849	0.232474	0
ENSG00000091947	protein_coding	TMEM101	21.4368	28.2388	23.3675	12.5847	8.31963	12.3385
ENSG00000091972	protein_coding	CD200	0	0	0	0.182065	0	0.102757
ENSG00000091986	protein_coding	CCDC80	13.3505	7.54322	7.94677	52.6739	54.5849	49.2517
ENSG00000092009	protein_coding	CMA1	0	0	0.245257	0	0.186767	0
ENSG00000092010	protein_coding	PSME1	81.9762	113.406	98.8579	89.2263	104.252	89.6776
ENSG00000092020	protein_coding	PPP2R3C	6.43458	6.54449	8.86385	3.33623	3.94126	3.85079
ENSG00000092036	protein_coding	HAUS4	32.1671	17.4251	17.197	7.29221	7.99532	7.74723
ENSG00000092051	protein_coding	JPH4	0	0.0795462	0.0433841	0.0685365	0.0330378	0.0696275
ENSG00000092054	protein_coding	MYH7	0	0	0	0	0	0.010199
ENSG00000092067	protein_coding	CEBPE	0	0	0	0	0	0
ENSG00000092068	protein_coding	SLC7A8	7.19728	5.1342	4.98661	8.05943	6.92293	7.79783
ENSG00000092094	protein_coding	OSGEP	8.97397	10.3015	10.8257	6.42225	5.35682	6.39009
ENSG00000092096	protein_coding	SLC22A17	1.66011	0.393975	0.483462	0.721323	0.654516	0.431062
ENSG00000092098	protein_coding	RNF31	14.5482	11.9173	12.3175	7.82657	6.99174	8.77788
ENSG00000092108	protein_coding	SCFD1	22.792	28.9231	33.7359	13.0263	12.6405	12.4281
ENSG00000092140	protein_coding	G2E3	3.1028	4.92841	5.20324	2.98019	3.13609	2.97486
ENSG00000092148	protein_coding	HECTD1	21.4919	25.3008	27.4149	23.7939	23.6503	21.9796
ENSG00000092199	protein_coding	HNRNPC	226.885	241.953	244.74	426.193	529.792	502.016
ENSG00000092200	protein_coding	RPGRIP1	0	0.0770304	0.042012	0.0331844	0.0319929	0
ENSG00000092201	protein_coding	SUPT16H	57.2713	46.5324	52.7887	50.0624	58.2069	57.612
ENSG00000092203	protein_coding	TOX4	29.5455	28.5222	31.4683	34.046	36.3526	36.0356
ENSG00000092208	protein_coding	GEMIN2	8.46389	13.4492	15.0036	4.21371	4.18936	3.79028
ENSG00000092295	protein_coding	TGM1	62.3406	59.114	70.08	42.0871	32.0015	40.4694
ENSG00000092330	protein_coding	TINF2	49.1943	66.4972	71.8567	70.0775	72.2718	79.67
ENSG00000092345	protein_coding	DAZL	0	0	0	0	0.0481964	0
ENSG00000092377	protein_coding	TBL1Y	0	0	0	0	0	0
ENSG00000092421	protein_coding	SEMA6A	0.879732	0.38459	0.482433	2.86626	2.7314	2.91189
ENSG00000092439	protein_coding	TRPM7	3.5649	7.79407	10.1723	5.80626	6.20561	5.35251
ENSG00000092445	protein_coding	TYRO3	5.03984	3.91232	4.09682	2.19104	1.96612	1.96337
ENSG00000092470	protein_coding	WDR76	6.13142	2.49446	1.81396	1.92534	1.76987	1.5011
ENSG00000092529	protein_coding	CAPN3	3.61379	3.23258	3.31018	3.62356	4.09624	4.12395
ENSG00000092531	protein_coding	SNAP23	29.6463	31.6809	38.6806	15.0749	16.4176	17.4787
ENSG00000092607	protein_coding	TBX15	0	0	0.0529019	0.0417861	0	0
ENSG00000092621	protein_coding	PHGDH	3.57744	2.19433	1.8201	1.6346	0.854405	1.27381
ENSG00000092758	protein_coding	COL9A3	0	0	0.0474707	0	0	0.038093
ENSG00000092820	protein_coding	EZR	669.402	606.61	691.577	431.947	395.848	450.117
ENSG00000092841	protein_coding	MYL6	781.669	916.215	872.704	782.473	730.722	854.077
ENSG00000092847	protein_coding	AGO1	4.16343	3.51889	3.77219	5.67165	5.27901	5.90797
ENSG00000092850	protein_coding	TEKT2	0	0	0.117308	0	0	0.0941339
ENSG00000092853	protein_coding	CLSPN	5.76516	2.59202	3.04299	3.29312	3.37558	3.84545
ENSG00000092871	protein_coding	RFFL	8.52223	7.57372	9.04428	7.76232	8.10038	8.55748
ENSG00000092929	protein_coding	UNC13D	4.31896	3.36998	3.6463	1.35811	0.993298	1.22907
ENSG00000092931	protein_coding	MFSD11	6.161	9.72312	9.45459	3.63754	3.42723	2.82758
ENSG00000092964	protein_coding	DPYSL2	7.92627	7.27671	7.65389	3.85628	4.62928	4.91183
ENSG00000092969	protein_coding	TGFB2	7.71403	5.08413	7.59689	17.1618	14.4629	16.3275
ENSG00000092978	protein_coding	GPATCH2	4.53288	6.05274	5.97843	4.45533	4.75062	4.67921
ENSG00000093000	protein_coding	NUP50	31.8437	29.2125	32.8135	20.519	21.7158	20.0843
ENSG00000093009	protein_coding	CDC45	21.9742	10.1873	9.72315	3.10862	3.40835	3.69477
ENSG00000093010	protein_coding	COMT	85.4642	97.5878	89.4017	35.1292	21.819	25.781
ENSG00000093072	protein_coding	ADA2	0.233126	0	0.211219	0.750767	0.844445	0.720345
ENSG00000093134	protein_coding	VNN3	0	0	0.0381991	0.663799	0.610875	0.48023
ENSG00000093144	protein_coding	ECHDC1	20.1089	32.589	36.1551	14.8707	16.8033	16.8402
ENSG00000093167	protein_coding	LRRFIP2	25.711	27.9088	31.2178	20.781	20.9201	22.4133
ENSG00000093183	protein_coding	SEC22C	14.8597	13.892	17.0685	8.32064	9.28735	9.72632
ENSG00000093217	protein_coding	XYLB	1.84408	1.46512	1.77975	1.06151	1.10638	0.845241
ENSG00000094631	protein_coding	HDAC6	8.42119	6.19992	5.83076	8.13257	7.52693	7.28218
ENSG00000094661	protein_coding	OR1I1	0	0	0	0	0	0.020297
ENSG00000094755	protein_coding	GABRP	3.07377	1.36774	2.38708	8.6026	8.25584	8.34048
ENSG00000094796	protein_coding	KRT31	4.08338	2.60902	3.27278	2.13552	2.05884	2.28369
ENSG00000094804	protein_coding	CDC6	19.0075	10.2344	10.1251	3.21272	4.01998	4.13191
ENSG00000094841	protein_coding	UPRT	7.70066	9.36601	12.9573	13.5807	14.4688	13.8635
ENSG00000094880	protein_coding	CDC23	24.9465	26.8368	29.821	18.9148	20.207	18.1372
ENSG00000094914	protein_coding	AAAS	25.3265	23.7999	23.1896	22.5411	20.1398	20.9233
ENSG00000094916	protein_coding	CBX5	12.5151	8.62999	9.27597	10.0187	10.5201	10.9098
ENSG00000094963	protein_coding	FMO2	0.0818064	0	0	0.35127	0.423321	0.247821
[truncated: 17,938 more rows]

## Sheet: lncRNA_NHBE
Gene stable ID	Gene type	Gene name	SRX8089292	SRX8089293	SRX8089294	SRX7990869	SRX7990870	SRX7990871
ENSG00000082929	lncRNA	LINC01587	0	0	0	0.155944	0.150345	0
ENSG00000083622	lncRNA	AC000061.1	0	0	0	0	0	0
ENSG00000093100	lncRNA	AC016026.1	18.4018	18.3029	18.531	1.09046	2.30477	0.979989
ENSG00000099869	lncRNA	IGF2-AS	0	0	0	0.126538	0	0.0214254
ENSG00000103472	lncRNA	RRN3P2	0	0.742151	0.505957	0.319716	0.308236	0.75788
ENSG00000115934	lncRNA	AC087235.1	0	0	0	0	0	0
ENSG00000116652	lncRNA	DLEU2L	0.28539	0.355575	0.517144	0.408481	0.196907	0.276656
ENSG00000117242	lncRNA	PINK1-AS	7.76393	10.1475	10.6032	8.57956	6.97168	8.16272
ENSG00000120664	lncRNA	SPART-AS1	0	0.0837853	0.0913922	0.144378	0	0.036669
ENSG00000122043	lncRNA	LINC00544	0	0	0	0	0	0
ENSG00000122548	lncRNA	KIAA0087	0	0	0	0	0	0
ENSG00000124835	lncRNA	AC105760.1	0	0	0.103006	0.0813621	0	0
ENSG00000124915	lncRNA	MYRF-AS1	0	0	0	0	0	0
ENSG00000125514	lncRNA	LINC00029	0	0	0	0	0	0
ENSG00000125804	lncRNA	FAM182A	0	0	0	0.0706162	0.0510604	0.0418485
ENSG00000125899	lncRNA	LINC02871	0	0	0.252118	0.199143	0.0959962	0.134875
ENSG00000128254	lncRNA	C22orf24	0	0	0.0873454	0.0689924	0.13303	0.0700906
ENSG00000129816	lncRNA	TTTY1B	0	0	0	0	0	0
ENSG00000129845	lncRNA	TTTY1	0	0	0	0	0	0
ENSG00000130600	lncRNA	H19	11.9072	9.01764	7.53592	9.71192	5.91995	5.62285
ENSG00000131007	lncRNA	TTTY9B	0	0	0	0	0	0
ENSG00000131484	lncRNA	AC091132.1	0	0	0.42012	0	0	0
ENSG00000131538	lncRNA	TTTY6	0	0	0	0	0	0
ENSG00000131548	lncRNA	TTTY6B	0	0	0	0	0	0
ENSG00000132204	lncRNA	LINC00470	0	0	0	0.0199669	0	0
ENSG00000132832	lncRNA	AL139352.1	0	0	0	0	0	0
ENSG00000136275	lncRNA	C7orf69	0	0	0	0	0	0
ENSG00000136315	lncRNA	AL355922.1	0	0	0	0	0	0
ENSG00000137808	lncRNA	AC027088.1	0	0	0.205735	0	0	0
ENSG00000145063	lncRNA	AC062028.1	0	0	0	0	0	0
ENSG00000145075	lncRNA	CCDC39	0	0	0	0	0	0
ENSG00000146521	lncRNA	LINC01558	0	0	0	0	0	0
ENSG00000146666	lncRNA	LINC00525	0	0	0	0	0	0
ENSG00000147753	lncRNA	TTTY7	0	0	0	0	0	0
ENSG00000147761	lncRNA	TTTY7B	0	0	0	0	0	0
ENSG00000149443	lncRNA	SCP2D1-AS1	0	0	0	0	0	0
ENSG00000149656	lncRNA	LINC00266-1	0	1.46508	0.958856	0.631151	0.851883	0.897676
ENSG00000151303	lncRNA	AL136982.1	0	0	0.151188	0	0	0.0404404
ENSG00000152931	lncRNA	PART1	1.03828	0.696566	0.741717	0.314368	0.344409	0.450024
ENSG00000153363	lncRNA	LINC00467	3.21527	4.18807	3.6083	2.40561	2.19319	2.40848
ENSG00000157306	lncRNA	ZFHX2-AS1	0.597153	0.578673	1.30751	2.02993	3.0214	3.67828
ENSG00000161149	lncRNA	TUBA3FP	0.239058	0	0.758077	0.256624	0.24741	0.405548
ENSG00000162888	lncRNA	C1orf147	0.242023	0.201029	0.32892	0.69282	0.500957	0.703849
ENSG00000162913	lncRNA	OBSCN-AS1	0.788112	0.981928	1.01157	0.564015	1.13284	0.652576
ENSG00000162947	lncRNA	LINC01931	0	0	0	0	0.143797	0
ENSG00000163364	lncRNA	LINC01116	1.43165	1.98192	2.16186	0.597663	0.740833	0.578264
ENSG00000163597	lncRNA	SNHG16	57.1212	75.0178	80.5434	45.5151	44.9574	45.3916
ENSG00000163915	lncRNA	IGF2BP2-AS1	0.148545	0.246768	0.134586	0.106307	0	0.179998
ENSG00000164385	lncRNA	LINC01600	0	0.135572	0	0	0	0.0197778
ENSG00000164621	lncRNA	SMAD5-AS1	0	0	0	0	0	0
ENSG00000165511	lncRNA	ZNF22-AS1	0.164809	0.410679	0.447964	0.294865	0	0.239647
ENSG00000166770	lncRNA	ZNF667-AS1	2.41761	2.21584	1.85053	0.939662	0.819644	1.12635
ENSG00000166917	lncRNA	MIR202HG	0	0	0	0	0	0
ENSG00000167046	lncRNA	AL357033.1	0	0	0	0	0	0
ENSG00000167459	lncRNA	LINC00905	0	0	0	0	0	0
ENSG00000167912	lncRNA	AC090152.1	0.261823	0	0.296524	0	0	0.126905
ENSG00000167920	lncRNA	TMEM99	9.9695	16.1476	17.6889	5.23212	4.98693	5.17447
ENSG00000168367	lncRNA	LINC00917	0	0	0	0	0	0
ENSG00000168746	lncRNA	LINC01620	0	0	0	0	0	0
ENSG00000170161	lncRNA	AL512625.1	0.92671	1.38553	3.35851	0.397922	0.831207	1.59457
ENSG00000170919	lncRNA	TPT1-AS1	3.42899	3.51663	3.23358	1.7904	2.41414	2.00121
ENSG00000170983	lncRNA	LINC00208	0	0	0	0	0	0
ENSG00000171671	lncRNA	SHANK2-AS3	0	0	0	0	0	0
ENSG00000171889	lncRNA	MIR31HG	10.2681	11.9704	11.5066	5.86584	6.09024	6.33031
ENSG00000171987	lncRNA	C11orf40	0	0	0	0	0	0
ENSG00000172965	lncRNA	MIR4435-2HG	3.63074	2.65879	2.36982	1.48477	1.47236	1.91604
ENSG00000173077	lncRNA	DELEC1	0.0762829	0.316809	0.276458	0.354849	0.421055	0.305036
ENSG00000173811	lncRNA	CCDC13-AS1	0	0	0	0.229771	0.0738401	0.0259365
ENSG00000173862	lncRNA	AC008080.1	0	0	0	0	0	0
ENSG00000174171	lncRNA	AC020659.1	0.0751305	0	0.0680704	0.0537674	0	0
ENSG00000174365	lncRNA	SNHG11	4.59636	6.51822	5.63722	2.80803	2.93924	1.63013
ENSG00000174403	lncRNA	MIR1-1HG-AS1	0	0	0	0	0	0
ENSG00000174407	lncRNA	MIR1-1HG	0	0	0	0	0	0
ENSG00000174680	lncRNA	GRIK1-AS1	0.220318	0	0	0	0	0
ENSG00000175061	lncRNA	SNHG29	263.043	337.567	330.682	123.744	128.081	141.33
ENSG00000175147	lncRNA	TMEM51-AS1	0.550794	0.457499	0.383873	1.00061	0.599269	0.811173
ENSG00000175170	lncRNA	FAM182B	0.222622	0.184914	0.100851	0.132767	0	0.0539521
ENSG00000175604	lncRNA	AC007601.1	0	0	0.116416	0	0	0
ENSG00000175611	lncRNA	LINC00476	0.915946	0.5072	1.07192	0.682813	0.631963	0.425458
ENSG00000175728	lncRNA	LINC02873	0.429051	0.712754	0.0647888	0.102351	0.197351	0.15597
ENSG00000175746	lncRNA	C15orf54	0	0	0.149321	0.058973	0	0
ENSG00000175772	lncRNA	LINC01106	12.9434	9.924	9.54705	10.8068	12.7086	11.4011
ENSG00000175773	lncRNA	ZBTB44-DT	0	0	0.17489	0.0690711	0.133182	0
ENSG00000175779	lncRNA	LINC02694	0	0	0	0.0214207	0	0
ENSG00000175967	lncRNA	LINC02880	0	0	0	0	0	0
ENSG00000176124	lncRNA	DLEU1	0.678439	0.774843	0.79717	0.356559	0.35107	0.339113
ENSG00000176236	lncRNA	RPP38-DT	0.591927	0	0.536303	0.105904	0.306303	0.537947
ENSG00000176320	lncRNA	AL138899.1	0	0	0	0	0	0
ENSG00000176349	lncRNA	AC104129.1	0	0	0	0	0	0
ENSG00000176515	lncRNA	AL033381.1	0	0	0	0	0	0.0357901
ENSG00000176593	lncRNA	AC008969.1	1.10615	1.33224	1.17759	2.01864	1.98431	2.33225
ENSG00000176659	lncRNA	C20orf197	2.39072	3.84744	3.51985	0.320799	1.08248	1.30362
ENSG00000176728	lncRNA	TTTY14	0	0	0	0	0	0
ENSG00000176753	lncRNA	C15orf56	0	0.365443	0.0996556	0	0	0.106625
ENSG00000176754	lncRNA	LINC00303	0.2553	0	0	0	0.088073	0
ENSG00000176840	lncRNA	MIR7-3HG	0.202427	0	0	0.0724337	0.0698328	0
ENSG00000176868	lncRNA	AL358781.1	17.5763	2.95089	2.96469	0	0	0
ENSG00000176912	lncRNA	TYMSOS	0.589405	0.32638	0.801027	0	0.338887	0.0714207
ENSG00000176984	lncRNA	AP000679.1	0	0.404956	0.11043	0.0872268	0.0840947	0.0886153
ENSG00000177112	lncRNA	MRVI1-AS1	0	0	0.485163	0.12774	0.246307	0.389321
ENSG00000177133	lncRNA	PRDM16-DT	0	0	0	0.0648282	0	0.0219534
ENSG00000177234	lncRNA	LINC01561	0	0	0	0	0	0
ENSG00000177335	lncRNA	C8orf31	0	0	0	0	0	0.0300805
ENSG00000177337	lncRNA	DLGAP1-AS1	1.43842	3.18606	3.36672	4.88969	3.80437	4.47367
ENSG00000177338	lncRNA	LINC00469	0	0	0	0	0	0
ENSG00000177340	lncRNA	AC024940.1	0	0	0.303574	0	0.115589	0.0812014
ENSG00000177369	lncRNA	AC004797.1	0.0907155	0	0	0	0	0.0109924
ENSG00000177406	lncRNA	NINJ2-AS1	1.0481	0.677111	0.896854	0.791749	0.642796	0.762018
ENSG00000177410	lncRNA	ZFAS1	53.0769	58.7314	56.2147	23.3148	20.7728	21.5494
ENSG00000177553	lncRNA	C1orf167-AS1	0	0	0	0	0	0
ENSG00000177596	lncRNA	AL355390.1	0	0	0	0	0	0
ENSG00000177640	lncRNA	CASC2	0.237174	0.112572	0.0920942	0.109115	0.128574	0.0780069
ENSG00000177699	lncRNA	AC011944.1	0	0	0	0	0	0
ENSG00000177725	lncRNA	AC105206.1	0	0	0.0969236	0	0.073809	0.129628
ENSG00000177738	lncRNA	AC025171.1	1.76507	1.9548	1.49259	1.64213	2.31386	2.01048
ENSG00000177757	lncRNA	FAM87B	0	0.216413	0	0	0	0
ENSG00000177788	lncRNA	AL162595.1	1.3615	1.85053	1.96247	1.52797	1.60121	1.99474
ENSG00000177800	lncRNA	TMEM78	0	0	0	0	0	0
ENSG00000177822	lncRNA	TENM3-AS1	0.494989	0.205573	0.485847	0.17712	0.170761	0.349883
ENSG00000177993	lncRNA	ZNRF3-AS1	0	0	0	0	0	0.0283269
ENSG00000178107	lncRNA	AL161668.1	0	1.17697	0	0	0	0
ENSG00000178130	lncRNA	FAM27E5	0	0	0	0	0	0
ENSG00000178243	lncRNA	C9orf62	0	0	0	0	0	0
ENSG00000178248	lncRNA	FAM230I	0	0	0	0	0	0
ENSG00000178412	lncRNA	AC068473.1	0	0.758517	0	0	0	0
ENSG00000178440	lncRNA	TIMM23B-AGAP6	0	0	4.75977	3.54843	2.64721	2.4891
ENSG00000178457	lncRNA	LINC00314	0	0	0	0	0	0
ENSG00000178722	lncRNA	C5orf64	0	0	0	0	0	0
ENSG00000178734	lncRNA	LMO7DN	0	0	0.19692	0	0.149958	0.105346
ENSG00000178803	lncRNA	ADORA2A-AS1	0	0	0	0	0.0434138	0.106744
ENSG00000178977	lncRNA	LINC00324	0.243651	1.21428	0.110377	0.784664	0.420272	0.20667
ENSG00000179028	lncRNA	AC245177.1	0	0	0	0	0	0
ENSG00000179066	lncRNA	AC020907.1	0	0.135965	0.0741548	0.234294	0.0564702	0.138847
ENSG00000179082	lncRNA	C9orf106	0	0	0	0	0	0
ENSG00000179136	lncRNA	LINC00670	0	0	0.0483191	0	0	0
ENSG00000179141	lncRNA	MTUS2-AS1	0	0	0	0	0	0
ENSG00000179219	lncRNA	LINC00311	0.323934	0	0.440241	0	0.223501	0.0392525
ENSG00000179253	lncRNA	AL162457.1	0	0	0	0	0	0
ENSG00000179406	lncRNA	LINC00174	1.26471	1.5214	1.32367	0.811467	0.616837	0.70284
ENSG00000179428	lncRNA	IL6-AS1	0	0	0	0	0.1283	0.0450656
ENSG00000179447	lncRNA	AL049647.1	0	0	0	0	0	0
ENSG00000179452	lncRNA	LINC01699	0	0	0	0	0	0
ENSG00000179523	lncRNA	EIF3J-DT	2.20365	2.56255	2.92831	3.25924	1.97655	2.26082
ENSG00000179577	lncRNA	AP003471.1	0	0	0	0	0	0
ENSG00000179676	lncRNA	LINC00305	0	0	0	0	0	0
ENSG00000179743	lncRNA	AL450998.2	1.23077	2.21497	1.85852	0.660603	0.353823	0.298275
ENSG00000179755	lncRNA	AC135776.1	0	0	0	0	0	0
ENSG00000179818	lncRNA	PCBP1-AS1	0.215476	0.413027	0.270316	0.207586	0.251594	0.255077
ENSG00000179840	lncRNA	PIK3CD-AS1	0	0	0	0	0	0
ENSG00000179935	lncRNA	LINC00652	0	0.101925	0	0.175635	0.169329	0.0892155
ENSG00000180066	lncRNA	LINC02870	0.497335	0.826189	0.901199	0.889798	0.772064	0.903962
ENSG00000180139	lncRNA	ACTA2-AS1	0	0	0	0.0570276	0	0
ENSG00000180259	lncRNA	PRNT	0	0	0	0	0	0
ENSG00000180422	lncRNA	LINC00304	0.128069	0	0	0.0458265	0	0.0620747
ENSG00000180458	lncRNA	AC022148.1	0.155274	0	0	0.0555613	0.107133	0.169337
ENSG00000180525	lncRNA	PRR26	0	0.0455668	0	0	0	0
ENSG00000180539	lncRNA	C9orf139	0.406638	0.16888	0.0921065	0	0	0.0492741
ENSG00000180712	lncRNA	LINC02363	0	0	0.169224	0.267333	0.257734	0.248956
ENSG00000180769	lncRNA	WDFY3-AS2	0.216856	0.270187	0.540315	0.465582	0.224432	0.361314
ENSG00000180846	lncRNA	CSNK1G2-AS1	0	0	0	0.269716	0	0
ENSG00000180861	lncRNA	LINC01559	7.82802	9.48665	13.2547	5.46439	6.02078	7.41739
ENSG00000180869	lncRNA	LINC01555	0	0	0.079683	0	0	0.021314
ENSG00000181097	lncRNA	LINC02878	1.29211	1.2879	1.63896	0.554821	1.15895	1.12731
ENSG00000181123	lncRNA	AC004832.1	0	0	0	0	0	0.0761389
ENSG00000181171	lncRNA	FER1L6-AS1	0	0	0	0	0	0
ENSG00000181211	lncRNA	HECW1-IT1	0	0	0	0	0	0
ENSG00000181798	lncRNA	LINC00471	0.772706	0.641822	0.52507	0.414742	0.39985	0.795872
ENSG00000181800	lncRNA	CELF2-AS1	0.20546	0	0	0.0735192	0.212638	0.248965
ENSG00000181908	lncRNA	LINC02724	0	0	0	0.0775722	0	0
ENSG00000182057	lncRNA	OGFRP1	3.99769	3.1086	3.39083	1.36961	1.52583	1.24712
ENSG00000182165	lncRNA	TP53TG1	8.29484	10.4065	8.41564	7.01836	7.39231	7.14055
ENSG00000182257	lncRNA	PRR34	0	0.448729	0.0815782	0.128874	0.0621232	0.130925
ENSG00000182352	lncRNA	C17orf77	0	0	0	0.0653416	0	0.0221272
ENSG00000182366	lncRNA	FAM87A	0	0.827812	0.90297	0.534928	0.481339	0.700438
ENSG00000182376	lncRNA	AC138028.1	0	0	0	0	0.0781953	0.0823987
ENSG00000182586	lncRNA	LINC00334	0	0.181229	0.0988412	0.156145	0	0.211508
ENSG00000182648	lncRNA	LINC01006	0.402866	0.517151	0.447964	0.248997	0.202153	0.0976339
ENSG00000182776	lncRNA	AC239585.1	0	0	0	0	0	0
ENSG00000182824	lncRNA	FAM230E	0	0	0	0	0	0
ENSG00000182873	lncRNA	PRKCZ-AS1	1.46275	1.45798	1.85541	1.1515	0.403693	0.815339
ENSG00000182912	lncRNA	TSPEAR-AS2	0	0	0	0	0.0578325	0.0406275
ENSG00000183146	lncRNA	PRORY	0	0	0	0	0	0
ENSG00000183154	lncRNA	AC138356.1	0.243184	0.201992	0	0	0	0.0884028
ENSG00000183242	lncRNA	WT1-AS	0	0	0	0	0	0
ENSG00000183250	lncRNA	LINC01547	0.923075	1.61864	1.44035	0.550502	0.6015	0.484696
ENSG00000183308	lncRNA	AC005037.1	0	0	0	0	0.359714	0
ENSG00000183385	lncRNA	TTTY8	0	0	0	0	0	0
ENSG00000183470	lncRNA	AC009365.1	0	0	0	0	0	0
ENSG00000183535	lncRNA	COL18A1-AS1	0	0	0	0	0	0
ENSG00000183562	lncRNA	AC131971.1	0.342295	0.284316	0.930388	0	0	0.373296
ENSG00000183643	lncRNA	C15orf32	0	0	0	0	0	0
ENSG00000183674	lncRNA	LINC00518	0	0.206953	0.338614	0	0.343814	0.120765
ENSG00000183784	lncRNA	DOCK8-AS1	0	0.13725	0.224566	0.118253	0.171011	0.160181
ENSG00000183822	lncRNA	NCF4-AS1	0	0	0	0	0	0
ENSG00000184029	lncRNA	DSCR4	0	0	0	0	0	0
ENSG00000184068	lncRNA	SREBF2-AS1	2.54574	2.2555	3.22912	0.910935	0.761129	1.06939
ENSG00000184224	lncRNA	C11orf72	0	0	0	0.149153	0.0718986	0.0757635
ENSG00000184274	lncRNA	LINC00315	0.218373	0	0	0	0	0
ENSG00000184385	lncRNA	UMODL1-AS1	0	0	0	0	0	0
ENSG00000184441	lncRNA	AP001062.1	4.54386	3.77421	3.95853	2.41803	2.00966	2.27299
ENSG00000184566	lncRNA	AC132216.1	0	0	0	0	0	0
ENSG00000184608	lncRNA	FAM167A-AS1	0	0	0	0	0	0
ENSG00000184809	lncRNA	B3GALT5-AS1	0	0	0	0	0	0.0319779
ENSG00000184856	lncRNA	LINC00308	0	0	0	0	0	0
ENSG00000184991	lncRNA	TTTY13	0	0	0	0	0	0
ENSG00000185065	lncRNA	AC000068.1	0.483816	0.401866	0.219176	0	0.417265	0.29313
ENSG00000185168	lncRNA	LINC00482	0	0	0.418399	0.165243	0.159309	0.363725
ENSG00000185186	lncRNA	LINC00313	1.20494	1.00085	1.09171	4.31161	3.01368	2.66465
ENSG00000185203	lncRNA	WASIR1	0	0	0	0.172219	0	0.0583202
ENSG00000185332	lncRNA	AC027601.1	0.133706	0.555293	0.847992	0.669811	0.138377	0.145816
ENSG00000185433	lncRNA	LINC00158	0	0	0	0	0	0
ENSG00000185594	lncRNA	SPATA8	0	0	0	0	0	0
ENSG00000185700	lncRNA	TTTY8B	0	0	0	0	0	0
ENSG00000185837	lncRNA	HDHD5-AS1	0	0	0	0	0	0
ENSG00000185847	lncRNA	LINC01405	0.359392	0.149258	0.16281	0.03215	0.0619912	0.11976
ENSG00000185904	lncRNA	LINC00839	0.722709	0.350171	0.600229	0.883566	0.72718	0.430571
ENSG00000186019	lncRNA	AC021092.1	0.0848013	0.915686	0.384162	3.03442	1.02391	2.1168
ENSG00000186056	lncRNA	MATN1-AS1	0.378192	0.418843	0.399762	0.451091	0.478383	0.397168
ENSG00000186235	lncRNA	LINC02610	0	0	0	0	0	0.0477742
ENSG00000186594	lncRNA	MIR22HG	57.9313	72.9542	73.8826	44.6806	47.7649	42.5716
ENSG00000186615	lncRNA	KTN1-AS1	0.250108	0.727103	0.821443	0.223738	0.301986	0.25003
ENSG00000186960	lncRNA	LINC01551	0	0	0.0213753	0.0337678	0.0162777	0
ENSG00000187012	lncRNA	LINC00207	0	0	0	0	0	0
ENSG00000187013	lncRNA	LINC02875	0	0	0	0	0	0.0803522
ENSG00000187185	lncRNA	AC092118.1	0	0.199317	0.217413	0.343461	0	0.0290773
ENSG00000187229	lncRNA	AC100800.1	0	0	0.335646	0	0.2556	0.119707
ENSG00000187600	lncRNA	LINC02583	0	0	0	0	0	0
ENSG00000187621	lncRNA	TCL6	0	0	0	0	0	0
ENSG00000187904	lncRNA	AC097382.1	0	0	0	0	0	0
ENSG00000187951	lncRNA	AC091057.1	2.24978	1.27072	1.58993	0.96604	0.807172	0.872371
ENSG00000187979	lncRNA	FAM230D	0	0	0	0	0	0
ENSG00000188004	lncRNA	SNHG28	0.452526	0	1.025	0	0.312223	0.329007
ENSG00000188185	lncRNA	LINC00265	1.24459	1.45945	1.29347	0.969288	0.909228	0.913747
ENSG00000188242	lncRNA	AC010442.1	9.16994	6.39804	7.31125	4.26563	3.85939	4.15574
ENSG00000188280	lncRNA	FAM230G	0	0	0	0	0	0
ENSG00000188365	lncRNA	AC092171.1	0	0	0	0	0.232405	0
ENSG00000188511	lncRNA	C22orf34	0	0	0	0	0	0
ENSG00000188525	lncRNA	AC010969.1	0	0.150808	0	0	0	0
ENSG00000188660	lncRNA	LINC00319	0	1.08242	1.39536	1.31413	0.531297	1.2202
ENSG00000188693	lncRNA	CYP51A1-AS1	0	0	0.0662264	0	0	0.0354291
ENSG00000188825	lncRNA	LINC00910	1.11746	0.580114	0.75934	1.03297	0.963751	1.25816
ENSG00000189196	lncRNA	LINC00994	0	0	0	0.0852602	0	0
ENSG00000189223	lncRNA	PAX8-AS1	1.58346	1.54399	1.71536	1.36314	1.33794	1.43767
ENSG00000189229	lncRNA	AC069277.1	0	0	0	0	0	0
ENSG00000189238	lncRNA	LINC00943	0	0	0	0	0	0
ENSG00000189275	lncRNA	LINC01164	0	0	0	0	0	0
ENSG00000189295	lncRNA	ANKRD62P1-PARP4P3	0	0	0	0	0	0
ENSG00000189316	lncRNA	AC073349.1	0	0.396757	0	0	0	0
ENSG00000189419	lncRNA	SPATA41	0.0877194	0.145722	0.0794763	0.0627767	0.121045	0.106293
ENSG00000196096	lncRNA	SPAG16-DT	0	0	0	0	0	0
ENSG00000196167	lncRNA	COLCA1	0	0	0	0.0790415	0.0381017	0.0535332
ENSG00000196243	lncRNA	LINC00615	0.360797	0.299684	0.653786	0	0	0.0874388
ENSG00000196273	lncRNA	LINC00523	0	0	0	0	0	0
ENSG00000196295	lncRNA	GARS1-DT	0.725724	0.808298	0.717302	1.30432	1.21197	1.3071
ENSG00000196366	lncRNA	C9orf163	0.197156	0.163761	0.267943	0.141095	0.136029	0.119451
ENSG00000196566	lncRNA	AL138767.1	0	0	0	0	0	0
ENSG00000196634	lncRNA	LUADT1	0	0	0	0	0	0
ENSG00000196668	lncRNA	LINC00173	0.194584	0.32325	0.0881495	0.208882	0.604146	0.424415
ENSG00000196696	lncRNA	AC009022.1	4.32041	4.87509	4.72684	3.38361	3.59957	3.7338
ENSG00000196741	lncRNA	LINC01560	1.21456	0.336278	0.917022	0.289735	0.558663	0.539636
ENSG00000196756	lncRNA	SNHG17	5.66315	8.5882	8.64881	2.79402	2.54569	3.08803
ENSG00000196758	lncRNA	AC079612.1	0	0	0	0	0	0
ENSG00000196810	lncRNA	CTBP1-DT	2.65966	1.61646	2.0277	2.08909	1.34272	1.43848
ENSG00000196893	lncRNA	AC090286.1	0	0	0	0	0	0
ENSG00000196951	lncRNA	SCOC-AS1	0.296552	0.344849	0.376158	0.14856	0.225069	0.158112
ENSG00000196979	lncRNA	GPRACR	0.155703	0	0	0	0	0.0377345
ENSG00000197085	lncRNA	NPSR1-AS1	0	0	0.0323397	0.0510889	0	0.00865
ENSG00000197099	lncRNA	AC068631.1	0	0	0	0	0	0
ENSG00000197176	lncRNA	LINC02291	0	0	0	0	0	0
ENSG00000197180	lncRNA	AC244090.1	5.08978	2.81844	3.07432	2.1248	2.34115	3.80329
ENSG00000197182	lncRNA	MIRLET7BHG	4.25096	5.29638	6.90059	3.16898	3.11629	3.94915
ENSG00000197210	lncRNA	AP000550.1	0.104962	0	0.0950986	0	0	0
ENSG00000197251	lncRNA	LINC00336	0.24076	0	0.327203	0.0861504	0	0.14587
ENSG00000197291	lncRNA	RAMP2-AS1	0	0.101093	0	0.0435506	0	0.0147479
ENSG00000197301	lncRNA	HMGA2-AS1	0.168169	0.628577	0.495189	0.571666	0.551139	0.305666
ENSG00000197308	lncRNA	GATA3-AS1	0	0	0	0	0	0
ENSG00000197322	lncRNA	C17orf102	0	0	0	0	0	0
ENSG00000197332	lncRNA	AC008543.1	0.29029	0.482239	0.72328	0.259684	0.100144	0.369344
ENSG00000197462	lncRNA	AC003975.1	0	0	0	0	0	0
ENSG00000197503	lncRNA	LINC00477	0	0	0	0	0	0
ENSG00000197536	lncRNA	IRF1-AS1	0.15644	0.216569	0.212608	0.242573	0.269841	0.309622
ENSG00000197585	lncRNA	AC068051.1	0	0	0	0	0	0
ENSG00000197595	lncRNA	ATP11AUN	0	0	0	0	0	0
ENSG00000197644	lncRNA	AC106870.1	0	0	0	0	0	0
ENSG00000197665	lncRNA	AC007952.1	0	0	0	0	0.120524	0
ENSG00000197670	lncRNA	AL157838.1	0.20275	0.168408	0.275546	0.798045	1.46883	1.40038
ENSG00000197813	lncRNA	AC011450.1	0	0	0.650087	0.51349	0.247526	1.13027
ENSG00000197815	lncRNA	AC122129.1	0.558988	1.16076	0.126615	2.20023	1.34987	1.69337
ENSG00000197880	lncRNA	MDS2	0	0	0	0.0847427	0	0
ENSG00000197934	lncRNA	CYYR1-AS1	0.136623	0	0.123784	0.0488874	0	0.264883
ENSG00000197989	lncRNA	SNHG12	33.2955	31.4091	26.9346	17.1477	17.5986	16.8011
ENSG00000198054	lncRNA	DSCR8	0	0	0	0	0	0
ENSG00000198106	lncRNA	AC025279.1	0	0.174909	0.0953947	0.0376752	0.145289	0.089308
ENSG00000198221	lncRNA	AFDN-DT	0.121913	0.101263	0.110457	0.348991	0.462632	0.26591
ENSG00000198358	lncRNA	AL354714.1	0	0	0	0	0	0
ENSG00000198454	lncRNA	LINC02692	0	0	0	0	0	0
ENSG00000198468	lncRNA	FLVCR1-DT	1.66322	2.17092	1.23783	1.06276	1.18853	0.935718
ENSG00000198491	lncRNA	AC007920.1	0	0	0	0	0	0
ENSG00000198496	lncRNA	NBR2	3.82791	2.35008	2.11108	4.28785	3.38749	3.18641
ENSG00000198590	lncRNA	C3orf35	0.0565909	0.0470054	0.153819	0.121499	0.0780906	0.13029
ENSG00000198671	lncRNA	AC135895.1	0	0	0	0	0	0
ENSG00000198685	lncRNA	LINC01565	0	0	0	0	0	0
ENSG00000198711	lncRNA	SSBP3-AS1	0.579971	0.321156	0.262735	0.138353	0.200077	0.0468517
ENSG00000203258	lncRNA	AC013549.1	0	0	0	0	0	0
ENSG00000203266	lncRNA	AL157414.1	0	0	0	0	0	0.039053
ENSG00000203279	lncRNA	AL590705.1	0	0	0	1.06151	0.614039	0.215682
ENSG00000203280	lncRNA	KIAA1671-AS1	0	0	0.480263	0	0	0
ENSG00000203288	lncRNA	TDRKH-AS1	0.444594	0.369287	0.604222	0.954525	0.920251	1.88557
ENSG00000203307	lncRNA	FAM78B-AS1	0	0	0	0	0	0
ENSG00000203321	lncRNA	CARNMT1-AS1	0	0	0	0	0	0
ENSG00000203325	lncRNA	AL445248.1	0	0	0	0	0	0
ENSG00000203327	lncRNA	AC012358.1	0.5538	0	0	0	0	0
ENSG00000203334	lncRNA	AP003027.1	0	0	0	0	0	0
ENSG00000203335	lncRNA	AC006019.1	0	0	0	0	0	0
ENSG00000203356	lncRNA	LINC01562	0	0	0	0	0	0
ENSG00000203362	lncRNA	POLH-AS1	0	2.12806	0.928508	0.366705	0.530306	0.620903
ENSG00000203364	lncRNA	AL390760.1	0	0	0	0	0	0
ENSG00000203392	lncRNA	AC105020.1	0.23006	0.191091	0.208441	2.305	2.69843	2.56471
ENSG00000203395	lncRNA	AC015969.1	0	0	0	0	0	0
ENSG00000203402	lncRNA	AL591503.1	0	0	0	0.380543	0	0
ENSG00000203434	lncRNA	AL353740.1	0	0	0	0	0	0
ENSG00000203441	lncRNA	LINC00449	0	0	0	0.416328	0.602068	0.140985
ENSG00000203446	lncRNA	AC004988.1	0.859313	0.23792	0.389281	0.102495	0	0.0347089
ENSG00000203469	lncRNA	AL354956.1	0	0	0	0	0	0
ENSG00000203472	lncRNA	AC009163.1	0	0	0	0.633574	0	0
ENSG00000203496	lncRNA	AL133216.1	0	0	0	0.249682	0	0
ENSG00000203497	lncRNA	PDCD4-AS1	1.9561	2.70795	2.65842	1.6332	2.69925	1.42217
ENSG00000203498	lncRNA	AL139390.1	0	0	0	0	0	0
ENSG00000203506	lncRNA	RBMS3-AS2	0	0	0	0.0788184	0	0
ENSG00000203520	lncRNA	AP000753.1	0	0	0	0	0	0
ENSG00000203527	lncRNA	Z99756.1	0	0	0	0	0	0
ENSG00000203565	lncRNA	AL450313.1	0	0	0	0	0	0
ENSG00000203585	lncRNA	LINC02408	0	0	0	0	0	0
ENSG00000203588	lncRNA	IGBP1-AS1	0	0	0	0	0.32288	0.226825
ENSG00000203593	lncRNA	AC005342.1	0	0	0	0	0	0
ENSG00000203601	lncRNA	LINC00970	0	0	0	0	0	0
ENSG00000203605	lncRNA	AC096543.1	0	0	0	0	0	0
ENSG00000203620	lncRNA	AL354919.1	0.224759	0.373377	0.101819	0.0804249	0	0.16341
ENSG00000203635	lncRNA	AC144450.1	0.309129	0	0.14004	0	0.106643	0.149834
ENSG00000203643	lncRNA	AC012456.1	0	0	0	0	0	0
ENSG00000203644	lncRNA	AC083799.1	9.47668	19.4472	26.7686	0.797885	0.961545	1.48607
ENSG00000203645	lncRNA	LINC00501	0.247938	0	0.11232	0.0887189	0	0.0901312
ENSG00000203650	lncRNA	LINC01285	0	0	0	0	0.109581	0.0673585
ENSG00000203684	lncRNA	IBA57-DT	0	0	0	0.566362	0	0
ENSG00000203688	lncRNA	LINC02487	0.377722	0.418323	0.627417	0.0450531	0	0
ENSG00000203706	lncRNA	SERTAD4-AS1	6.06312	3.35742	2.51779	1.80796	1.91734	2.32653
ENSG00000203709	lncRNA	MIR29B2CHG	0.333239	0.478099	0.384268	1.2683	1.22276	1.42431
ENSG00000203711	lncRNA	C6orf99	0.832063	1.38225	0.125646	0.0992449	0	0.100825
ENSG00000203721	lncRNA	LINC00862	0.143462	0.119162	0.519923	0.308007	0.197965	0.243375
ENSG00000203729	lncRNA	LINC00272	0	0	0	0	0	0
ENSG00000203739	lncRNA	AL645568.1	0.422999	0.614862	0.670686	0.340561	0.474258	0.422867
ENSG00000203801	lncRNA	LINC00222	0	0.12726	0.0694068	0	0.158563	0.0371304
ENSG00000203804	lncRNA	ADAMTSL4-AS1	0	0.321401	0.17529	0.346146	0.20023	0.656424
ENSG00000203808	lncRNA	BVES-AS1	0	0	0.205581	0.0541282	0.104369	0.0824847
ENSG00000203809	lncRNA	LIN28B-AS1	0	0	0	0	0	0
ENSG00000203864	lncRNA	LINC02868	0	0	0	0	0	0
ENSG00000203865	lncRNA	ATP1A1-AS1	0.389378	0.323424	0.246951	0.250794	0.188058	0.301968
ENSG00000203875	lncRNA	SNHG5	5.87615	6.65264	6.27207	1.02252	1.24961	1.34605
ENSG00000203876	lncRNA	ADD3-AS1	0	0	0	0	0.0385253	0
ENSG00000203897	lncRNA	SPATA42	0	0	0	0.287669	0	0
ENSG00000203900	lncRNA	AL121827.1	0	0	0	0	0	0
ENSG00000203930	lncRNA	LINC00632	0	0.0145919	0.0397918	0.0314308	0.0484835	0.0191586
ENSG00000203971	lncRNA	AL354984.1	0	0	0	0	0	0
ENSG00000203987	lncRNA	AL772363.1	0	0	0	0	0	0
ENSG00000203993	lncRNA	ARRDC1-AS1	5.00842	7.13156	5.31568	6.70775	5.52895	6.17295
ENSG00000203999	lncRNA	LINC01270	0.375139	0.389496	0.169943	0.536939	0.841196	0.55685
ENSG00000204011	lncRNA	COL5A1-AS1	0	0	0	0	0	0
ENSG00000204044	lncRNA	SLC12A5-AS1	0	0.18777	0	0	0	0
ENSG00000204049	lncRNA	AL391421.1	0	0.219228	0	0	0	0
ENSG00000204054	lncRNA	LINC00963	3.17366	2.75592	2.92444	2.4261	2.16481	2.31177
ENSG00000204055	lncRNA	AL158151.1	0	0	0.10044	0.0793352	0.152973	0.40299
ENSG00000204091	lncRNA	TDRG1	0	0	0	0	0	0
ENSG00000204092	lncRNA	LINC00951	0	0	0	0	0	0
ENSG00000204110	lncRNA	LINC02520	0	0	0	0	0	0
ENSG00000204117	lncRNA	AL162293.1	0	0	0	0	0	0
ENSG00000204148	lncRNA	LINC00474	0	0	0	0	0	0
ENSG00000204241	lncRNA	LINC02731	0	0	0	0.053006	0.076654	0
ENSG00000204250	lncRNA	LINC00587	0	0	0	0	0	0
ENSG00000204261	lncRNA	PSMB8-AS1	0.418722	0.173899	0	0.973894	0.938925	0.228322
ENSG00000204277	lncRNA	LINC01993	0	0	0	0	0	0.0209507
ENSG00000204282	lncRNA	TNRC6C-AS1	2.99621	4.59453	5.53371	2.10301	2.66358	2.17838
ENSG00000204283	lncRNA	LINC01973	0	0	0	0	0	0
ENSG00000204362	lncRNA	LINC02783	0.976375	2.34287	2.01498	5.82289	7.11082	7.17757
ENSG00000204380	lncRNA	PKP4-AS1	0.0863604	0.143465	0	0.278119	0.208547	0.177899
ENSG00000204387	lncRNA	SNHG32	78.0216	97.56	91.4885	20.8631	20.5026	24.1987
ENSG00000204393	lncRNA	NOL4L-DT	0	0	0	0	0	0
ENSG00000204398	lncRNA	AL359649.1	0	0	0	0	0	0
ENSG00000204446	lncRNA	LINC02872	0	0	0	0	0	0
ENSG00000204460	lncRNA	LINC01854	0	0	0	0	0	0
ENSG00000204464	lncRNA	C1orf195	0	0	0	0	0	0
ENSG00000204528	lncRNA	PSORS1C3	1.7109	4.2633	1.93765	8.26477	5.90223	6.01219
ENSG00000204581	lncRNA	ACOXL-AS1	0	0	0	0.093262	0.0299711	0.0736917
ENSG00000204584	lncRNA	AC027801.1	0	0.200646	0.328294	0.0864376	0.166668	0.0585423
ENSG00000204588	lncRNA	LINC01123	10.6229	8.69567	10.1128	9.91605	11.4189	11.3238
ENSG00000204603	lncRNA	LINC01257	0	0	0	0	0	0
ENSG00000204620	lncRNA	AC115618.1	0	3.06999	3.34872	1.65318	0.95629	0.223932
ENSG00000204625	lncRNA	HCG9	0	0	0	0.259313	0	0
ENSG00000204661	lncRNA	C5orf60	0	0	0.0699774	0	0.106578	0
ENSG00000204666	lncRNA	AC010624.1	0.332643	0	0.150692	0.595144	0.22951	0.765849
ENSG00000204677	lncRNA	FAM153CP	0.0197393	0.0491875	0.0357688	0.0211898	0.0408579	0.0287028
ENSG00000204682	lncRNA	MIR1915HG	4.27297	3.5492	3.75045	3.10575	2.07293	2.47561
ENSG00000204684	lncRNA	AL133464.1	0	0	0.0434744	0	0	0
ENSG00000204685	lncRNA	STARD7-AS1	2.06913	1.62317	1.51017	0.575859	0.912084	0.766105
ENSG00000204706	lncRNA	MAMDC2-AS1	0	0.0427252	0.0233021	0.0368118	0	0.0311648
ENSG00000204709	lncRNA	LINC01556	0	0	0	0	0	0
ENSG00000204754	lncRNA	LINC01951	0	0	0	0	0	0
ENSG00000204758	lncRNA	AC008429.1	1.27733	0	0.495984	0.457062	0.6295	0.243224
ENSG00000204792	lncRNA	LINC01291	0	0.1009	0	0	0	0.0294394
ENSG00000204802	lncRNA	AL590399.1	2.62161	1.08878	1.61178	1.87616	2.1318	1.13454
ENSG00000204814	lncRNA	AL935212.1	0	0	0	0	0	0
ENSG00000204832	lncRNA	ST8SIA6-AS1	0	0	0	0.0651539	0	0
ENSG00000204850	lncRNA	AC011484.1	0	0	0.115191	0	0	0.0308118
ENSG00000204860	lncRNA	FAM201A	1.58237	0.7667	1.3142	0.188738	0.318432	0.11185
ENSG00000204876	lncRNA	AC021218.1	0	0	0	0	0	0
ENSG00000204904	lncRNA	LINC01545	0	0	0	0	0.986848	0
ENSG00000204929	lncRNA	AC007389.1	0	0	0	0	0	0
ENSG00000204934	lncRNA	ATP6V0E2-AS1	0.924852	0.640165	0.907771	0.441249	0.319054	0.18678
ENSG00000204949	lncRNA	FAM83A-AS1	16.6552	16.6676	21.7261	16.5148	19.1754	22.2729
ENSG00000204960	lncRNA	BLACE	0	0	0	0	0	0
ENSG00000204971	lncRNA	AP000812.1	0	0	0	0	0	0
ENSG00000204990	lncRNA	AC005692.1	0	0	0	0	0	0
ENSG00000205015	lncRNA	LINC02138	0	0	0	0	0	0
ENSG00000205018	lncRNA	AC092384.1	0	0	0	0	0	0
ENSG00000205037	lncRNA	AC134312.1	0	0	0	0	0	0.0169993
ENSG00000205041	lncRNA	AC118344.1	0.346978	0	0.157186	0.993263	0.478799	1.00907
ENSG00000205054	lncRNA	LINC01121	0	0	0.0472171	0	0	0
ENSG00000205056	lncRNA	LINC02397	0	0	0	0	0	0
ENSG00000205086	lncRNA	C2orf91	0	0	0	0.041671	0	0
ENSG00000205106	lncRNA	LINC02716	0	0	0	0	0	0.0947141
ENSG00000205174	lncRNA	C7orf66	0	0	0	0	0	0
ENSG00000205181	lncRNA	LINC00654	0.0627823	0.0521481	0	0.0673956	0.0866342	0.0532532
ENSG00000205231	lncRNA	TTLL10-AS1	0	0	0	0	0	0
ENSG00000205293	lncRNA	LINC01602	0	0	0.0566164	0	0	0
ENSG00000205300	lncRNA	AL356414.1	0	0	0	0	0	0
ENSG00000205325	lncRNA	AC005863.1	1.4738	0.856913	0.734417	2.21493	0.915171	1.42869
ENSG00000205334	lncRNA	LINC01460	0	0	0	0.0634681	0	0
ENSG00000205396	lncRNA	LINC00661	0	0	0	0	0	0
ENSG00000205414	lncRNA	AC007608.1	0	0	0	0	0	0
ENSG00000205424	lncRNA	PCBP3-AS1	0	0	0	0	0	0
ENSG00000205444	lncRNA	AL034376.1	0	0	0	0.158809	0.153107	0
ENSG00000205452	lncRNA	AC140658.1	0	0	0	0	0	0
ENSG00000205488	lncRNA	CALML3-AS1	1.04708	0.640846	0.549237	3.21429	3.74527	3.17865
ENSG00000205500	lncRNA	MAPRE3-AS1	0	0	0	0	0	0
ENSG00000205537	lncRNA	AC121338.1	0	0	0	0	0	0
ENSG00000205559	lncRNA	CHKB-DT	0.488475	0.912905	0.774502	0.0873947	0.210642	0.295953
ENSG00000205562	lncRNA	AL049775.1	1.93573	2.91422	2.24709	2.90049	2.50419	2.4189
ENSG00000205611	lncRNA	LINC01597	0	0	0	0.12205	0	0
ENSG00000205622	lncRNA	AP001042.1	0	0	0.0213079	0.050492	0	0.0626948
ENSG00000205628	lncRNA	LINC01446	0	0	0	0	0	0
ENSG00000205632	lncRNA	LINC01310	0	0	0	0	0	0
ENSG00000205634	lncRNA	LINC00898	0	0	0	0	0	0
ENSG00000205636	lncRNA	LINC00583	0	0	0	0	0	0
ENSG00000205653	lncRNA	AL035696.1	0	0	0	0	0	0
ENSG00000205682	lncRNA	AC020741.1	0	0.405345	0	0	0	0.236535
ENSG00000205696	lncRNA	ADARB2-AS1	0	0	0	0	0	0
ENSG00000205740	lncRNA	AL359878.1	0	0.169765	0.138883	0.0731341	0.035254	0.16098
ENSG00000205745	lncRNA	AC083864.1	0	0	0	0	0	0
ENSG00000205786	lncRNA	LINC01531	0	0	0	0	0	0
ENSG00000205790	lncRNA	DPP9-AS1	0.330369	0	0.82314	0	0.22794	0.36029
ENSG00000205791	lncRNA	LOH12CR2	0.329403	0.273608	0.447674	0.235739	0.340911	0.159661
ENSG00000205830	lncRNA	AC024132.1	0	0	0.183185	0	0	0
ENSG00000205837	lncRNA	LINC00487	0	0	0	0	0	0
ENSG00000205853	lncRNA	RFPL3S	0.587982	0.0610484	0.0998866	0.394492	0.329617	0.284993
ENSG00000205861	lncRNA	PCOTH	1.85139	2.15292	3.35483	1.05996	1.40512	0.942232
ENSG00000205865	lncRNA	FAM99B	0	0	0	0	0	0
ENSG00000205866	lncRNA	FAM99A	0	0	0	0	0	0
ENSG00000205885	lncRNA	C1RL-AS1	0.998913	1.79771	1.65925	2.17441	2.67068	2.33007
ENSG00000205890	lncRNA	AC108134.1	1.32579	0.963572	2.47749	1.48251	1.88665	1.72701
ENSG00000205913	lncRNA	SRRM2-AS1	0.46426	0.192811	0.140211	0.166125	0.0800798	0.140641
ENSG00000205930	lncRNA	C21orf62-AS1	0.0393363	0	0.0178199	0.0281512	0.0678509	0.0714983
ENSG00000205959	lncRNA	AC105345.1	0	0	0.152763	0.120664	0.27144	0.122585
ENSG00000205971	lncRNA	AC074389.1	0	0	0	0	0	0
ENSG00000206028	lncRNA	Z99774.1	0	0	0	0	0.0669732	0
ENSG00000206062	lncRNA	AL121823.1	0	0	0	0	0	0
ENSG00000206129	lncRNA	AC006305.2	0.635492	0.263925	0	0	0	0
ENSG00000206142	lncRNA	FAM230H	0	0	0	0	0	0.009702
ENSG00000206187	lncRNA	LINC02346	0	0	0	0	0	0
ENSG00000206195	lncRNA	DUXAP8	0.351094	0.333286	0.431709	0.233315	0.294149	0.358582
ENSG00000206249	lncRNA	AL359555.1	0	0	0	0	0	0
ENSG00000206337	lncRNA	HCP5	0.0458746	0.0762084	0.0831274	0.361134	0.0791287	0.333529
ENSG00000206344	lncRNA	HCG27	0	0	0	0.0700304	0.405095	0.118575
ENSG00000206417	lncRNA	H1FX-AS1	0.593311	0.492814	0.470363	0.477681	0.614039	0.557179
ENSG00000206552	lncRNA	KRBOX1-AS1	0	0	0	0	0	0
ENSG00000206567	lncRNA	AC022007.1	4.6279	1.39782	1.90592	2.18289	1.74167	2.19215
ENSG00000206573	lncRNA	THUMPD3-AS1	3.99099	4.15478	4.1704	2.55151	2.47825	2.96611
ENSG00000207751	lncRNA	AP000553.1	0	0	0.210252	0.166074	0	0
ENSG00000207955	lncRNA	AL359091.1	0	0	0.152796	0	0	0
ENSG00000211683	lncRNA	AP000346.1	0	0	0	0	0	0.395847
ENSG00000212663	lncRNA	AC003035.1	0	0	0	0	0	0.112995
ENSG00000212694	lncRNA	LINC01089	0.368307	1.32566	1.00109	1.71327	3.04939	2.85628
ENSG00000212719	lncRNA	LINC02693	1.55743	2.09909	2.23642	1.53518	1.73349	1.37445
ENSG00000212743	lncRNA	LINC02656	0	0	0	0.222541	0.143033	0.075361
ENSG00000212766	lncRNA	EWSAT1	0	0	0	0	0	0
ENSG00000212855	lncRNA	TTTY2	0	0	0	0	0	0
ENSG00000212856	lncRNA	TTTY2B	0	0	0	0	0	0
ENSG00000212930	lncRNA	AC093281.1	0	0	0	0	0	0
ENSG00000212939	lncRNA	Z97192.1	0	0	0	0	0	0
ENSG00000212978	lncRNA	AC016747.1	10.9321	13.5528	12.0484	4.02856	4.72824	5.39761
ENSG00000213057	lncRNA	C1orf220	0	0.30368	0	0.0654122	0.126127	0.0221512
ENSG00000213062	lncRNA	Z99572.1	0.251717	0.0896058	0.211773	0.167275	0.111647	0.069718
ENSG00000213121	lncRNA	AL590867.1	0	0	0	0.299536	0.14439	0.0507174
ENSG00000213279	lncRNA	Z97192.2	0	0	0	0	0	0
ENSG00000213373	lncRNA	LINC00671	0	0	0	0	0	0
ENSG00000213468	lncRNA	FIRRE	0.125182	0.485234	0.41587	0.223968	0.172741	0.379223
ENSG00000213599	lncRNA	SLX1A-SULT1A3	18.7026	14.5295	16.8454	7.24343	4.13687	6.43889
ENSG00000213600	lncRNA	U73169.1	0	0	0.626174	0.494602	0	0
ENSG00000213742	lncRNA	ZNF337-AS1	0.254022	0.632984	1.38091	0.484778	0.642635	0.451453
ENSG00000213888	lncRNA	LINC01521	0.261081	0.216859	0.591368	0.46711	0.72054	0.284727
ENSG00000213904	lncRNA	LIPE-AS1	0.70131	0.87378	1.05901	0.878317	1.00807	0.665683
ENSG00000213963	lncRNA	AC019080.1	0.565925	0.705101	0.576838	0.405007	0.585696	0.822907
ENSG00000213981	lncRNA	AC007277.1	0	0	0	0	0	0
ENSG00000213994	lncRNA	AL157395.1	1.15818	0	0	0	0	0
ENSG00000214039	lncRNA	LINC02418	0	0	0	0	0	0
ENSG00000214043	lncRNA	LINC02347	0	0	0	0	0	0
ENSG00000214049	lncRNA	UCA1	0.732712	0.405736	0.663859	2.84033	1.98003	3.44785
ENSG00000214106	lncRNA	PAXIP1-AS2	1.37103	1.2337	1.08692	1.39001	1.37951	1.75825
ENSG00000214145	lncRNA	LINC00887	0.208457	0	0.141651	0.634029	0.32361	0.631492
ENSG00000214146	lncRNA	LINC02026	0	0	0	0	0	0
ENSG00000214184	lncRNA	GCC2-AS1	0.634895	1.05471	0.287617	0.454365	0.657075	0.153866
ENSG00000214188	lncRNA	ST7-OT4	0	0.158167	0	0	0.131382	0
ENSG00000214248	lncRNA	AC010336.1	0.53522	0	0	0.11491	0	0.233478
ENSG00000214293	lncRNA	APTR	2.05794	2.42159	3.22412	1.22731	0.946591	1.52738
ENSG00000214353	lncRNA	VAC14-AS1	0	0	0.0502582	0.039698	0.0191363	0
ENSG00000214381	lncRNA	LINC00488	0	0	0	0	0	0
ENSG00000214401	lncRNA	KANSL1-AS1	5.71731	4.74889	5.4155	1.67384	1.25513	0.692791
ENSG00000214407	lncRNA	LINC02085	0	1.84896	0	2.83208	0	0
ENSG00000214432	lncRNA	VPS33B-DT	0.147939	0.12288	0.134037	0	0.0510356	0.125484
ENSG00000214546	lncRNA	AC087491.1	0.530629	0	1.20191	2.08861	2.19667	1.47887
ENSG00000214548	lncRNA	MEG3	9.91671	11.5209	13.0419	8.4022	7.95734	8.90651
ENSG00000214559	lncRNA	AC019077.1	2.55557	0	1.15771	0.914453	0	0
ENSG00000214614	lncRNA	AC142086.1	0	0	0	0	0	0
ENSG00000214650	lncRNA	AC073592.1	0	0	0	0.105719	0	0.107401
ENSG00000214691	lncRNA	LINC01913	0	0	0	0	0	0
ENSG00000214708	lncRNA	AC116407.1	0.317249	2.37161	1.14975	1.58928	1.20388	1.38393
ENSG00000214719	lncRNA	AC005562.1	2.50668	3.77681	3.01056	2.52399	2.63447	3.53898
ENSG00000214770	lncRNA	AL161756.1	0	0.377221	0	0	0.104447	0.0366872
ENSG00000214772	lncRNA	AC010168.1	2.31635	2.56534	1.39912	6.35454	7.99092	8.13979
ENSG00000214773	lncRNA	AC112512.1	0	0	0	0	0	0
ENSG00000214783	lncRNA	POLR2J4	4.14139	2.33654	2.40708	2.76808	2.96521	2.71746
ENSG00000214788	lncRNA	AP000790.1	0	0	0	0	0	0
ENSG00000214797	lncRNA	AP002358.1	0	0	0	0.0647126	0	0
ENSG00000214803	lncRNA	AC090921.1	0	0	0.192306	0	0	0
ENSG00000214851	lncRNA	LINC00612	0	0.190401	0	0	0.0790787	0
ENSG00000214870	lncRNA	AC004540.1	0	0	0	0	0	0
ENSG00000214894	lncRNA	LINC00243	0.233662	0.582252	0.105852	0.250832	0.322434	0.169883
ENSG00000214900	lncRNA	LINC01588	0.144196	0.143726	0.130646	0.103194	0.149233	0.171234
ENSG00000214915	lncRNA	BX546450.1	0	0	0	0	0	0
ENSG00000214919	lncRNA	AC104472.1	0	0	0	0	0	0
ENSG00000214922	lncRNA	HLA-F-AS1	1.09249	0.907444	1.97966	0.912155	1.04691	1.10318
ENSG00000214942	lncRNA	AC113167.1	0	0	0	0	0	0
ENSG00000214955	lncRNA	AP000317.1	0	0	0	0	0	0
ENSG00000214970	lncRNA	AC005323.1	0	0	0	0	0	0
ENSG00000214999	lncRNA	AC129492.1	0	0	0.127387	0.301861	0.291022	0
ENSG00000215014	lncRNA	AL645728.1	2.37552	1.61439	0.880482	0.6182	0.298001	0.340189
ENSG00000215022	lncRNA	AL008729.1	0	0.270534	0.221322	0.46618	0.505621	0.374934
ENSG00000215023	lncRNA	AC131097.1	0	0	0	0	0	0
ENSG00000215039	lncRNA	CD27-AS1	2.67225	1.97299	1.95036	5.9497	6.04335	5.16293
ENSG00000215067	lncRNA	ALOX12-AS1	0.235106	0.716039	0.248515	0.392595	0.48664	0.370355
ENSG00000215068	lncRNA	AC025171.2	0.278471	0.539706	0.0841009	0.166074	0.384266	0.224957
ENSG00000215112	lncRNA	FAM74A1	0	0	0	0	0	0
ENSG00000215117	lncRNA	LINC00588	0	0	0	0.0441437	0	0
ENSG00000215162	lncRNA	LINC00269	0	0	0	0	0	0
ENSG00000215196	lncRNA	BASP1-AS1	0.042126	0	0	0.0150738	0.0290651	0.0357321
ENSG00000215231	lncRNA	LINC01020	0	0	0	0	0	0
ENSG00000215241	lncRNA	LINC02449	0.396159	0.493584	0.358931	0.496147	0.819997	0.67206
ENSG00000215244	lncRNA	LINC02649	0	0	0	0.0686791	0.0662131	0.0581436
ENSG00000215246	lncRNA	AC116351.1	0	0	0	0	0.0502588	0
ENSG00000215256	lncRNA	DHRS4-AS1	5.76661	4.49048	4.92538	5.35207	3.79221	3.9815
ENSG00000215304	lncRNA	AC135983.2	0.462426	0.384099	0.209486	0	0.159527	0.280171
ENSG00000215374	lncRNA	FAM66B	1.07021	0.500027	0.393918	0.43082	0.346126	0.502519
ENSG00000215386	lncRNA	MIR99AHG	0.0590879	0.0588953	0.0428283	0.0253719	0.0366913	0.0315037
ENSG00000215403	lncRNA	Z82180.1	0	0	0	0	0	0
ENSG00000215417	lncRNA	MIR17HG	0	0.334941	0	0.192389	0	0
ENSG00000215424	lncRNA	MCM3AP-AS1	0.911011	1.55544	1.26103	1.17717	1.20474	1.53934
ENSG00000215458	lncRNA	AATBC	3.12237	2.76639	2.92326	6.88982	4.88308	5.00685
ENSG00000215481	lncRNA	BCRP3	0	0	0	0	0.401149	0.0704521
ENSG00000215483	lncRNA	LINC00598	0	0.021418	0.0584064	0.009227	0.0266865	0.0468684
ENSG00000215498	lncRNA	FAM230B	0	0	0	0	0	0
ENSG00000215533	lncRNA	LINC00189	0	0	0	0.166991	0	0
ENSG00000215560	lncRNA	TTTY5	0	0	0	0	0	0
ENSG00000215692	lncRNA	AC114730.1	0	0	0	0	0	0
ENSG00000215765	lncRNA	AC245128.1	0	0	0	0	0	0
ENSG00000215769	lncRNA	ARHGAP27P1-BPTFP1-KPNA2P3	10.8536	17.3369	19.4404	11.5316	10.772	9.12532
ENSG00000215808	lncRNA	LINC01139	0.170086	0	0	0.0608613	0.088014	0.12366
ENSG00000215841	lncRNA	AP002761.1	0	0	0	0	0	0
ENSG00000215866	lncRNA	LINC01356	0.478116	0	0.0721979	0.22811	0.32988	0.444171
ENSG00000215881	lncRNA	LINC02337	0	0	0	0	0	0
ENSG00000216560	lncRNA	LINC00955	0	0	0	0	0	0
ENSG00000216863	lncRNA	LY86-AS1	0	0	0	0	0	0
ENSG00000216895	lncRNA	AC009403.1	3.49677	1.86716	3.96022	1.51936	1.80946	2.05806
ENSG00000217455	lncRNA	AC073316.1	0	0	0	0	0	0
ENSG00000217576	lncRNA	AL158066.1	1.73726	1.665	1.99778	1.72146	1.70575	1.84603
ENSG00000217702	lncRNA	AC073263.1	0.623962	0	0.141332	0	0	0
ENSG00000217825	lncRNA	AC099552.1	0	0	0	0	0	0
ENSG00000218018	lncRNA	AL109955.1	0	0.240226	0.262036	0	0.199545	0.350453
ENSG00000218109	lncRNA	KIRREL3-AS3	0	0	0	0	0	0
ENSG00000218357	lncRNA	LINC01644	0	0	0	0	0.321103	0
ENSG00000218416	lncRNA	AC110619.1	8.62456	7.03346	7.52996	4.03999	3.57035	5.5674
ENSG00000218510	lncRNA	LINC00339	2.69544	2.35082	2.99163	1.39852	1.95272	1.84539
ENSG00000218537	lncRNA	MIF-AS1	0.343686	1.71283	2.02403	0.368941	0	0.124938
ENSG00000218672	lncRNA	AC008060.1	0	0	0	0	0	0
ENSG00000218839	lncRNA	FAM138C	0	0	0.175157	0	0	0
ENSG00000219159	lncRNA	AC011298.1	0	0	0	0	0	0
ENSG00000219410	lncRNA	AC125494.1	9.09258	15.6318	12.5488	0.0756644	0	0.0768688
ENSG00000219445	lncRNA	AC019155.2	0	0	0	0	0	0
ENSG00000219665	lncRNA	ZNF433-AS1	1.46414	2.07459	1.13147	0.770454	0.772501	1.10624
ENSG00000220161	lncRNA	LINC02076	0	0	0	0.485085	0.654734	1.31415
ENSG00000220256	lncRNA	AC093802.1	0	0	0	0	0	0.009046
ENSG00000220575	lncRNA	HTR5A-AS1	0	0	0	0	0	0
ENSG00000220702	lncRNA	Z85994.1	0	0	0	0	0	0
ENSG00000220891	lncRNA	AC246793.1	0	0	0	0	0	0
ENSG00000220908	lncRNA	LINC02531	0	0	0	0	0	0
ENSG00000220925	lncRNA	IGBP1-AS2	0	0	0	0	0	0
ENSG00000221571	lncRNA	RNU6ATAC35P	0	0	0	0	0	0
ENSG00000221817	lncRNA	PPP3CB-AS1	0.967423	1.02271	1.1554	0.97557	1.30462	1.18292
ENSG00000221819	lncRNA	GAS8-AS1	1.02069	2.1195	0.462386	0.365229	0.352115	0.247362
ENSG00000221845	lncRNA	C7orf65	0	0	0	0	0	0
ENSG00000221857	lncRNA	AC020907.2	0	0	0	0	0	0
ENSG00000221949	lncRNA	LINC01465	1.30743	0.651582	0.473826	0.374266	0.451034	0.0950558
ENSG00000221953	lncRNA	C1orf229	0	0	0	0	0	0
ENSG00000221990	lncRNA	EXOC3-AS1	2.13528	3.29383	3.59287	0.873212	1.05232	0.443556
ENSG00000222000	lncRNA	AC092675.1	0	0	0	0	0.451034	0
ENSG00000222001	lncRNA	AC106876.1	0	0	0	0	0	0
ENSG00000222004	lncRNA	LINC02860	0	0	0	0	0	0
ENSG00000222005	lncRNA	LINC01118	0.150977	0	0.0683946	0	0	0.109767
ENSG00000222007	lncRNA	AC064874.1	0	0	0	0	0	0
ENSG00000222012	lncRNA	AC005481.1	0	0	0	0	0	0
ENSG00000222017	lncRNA	AC011997.1	0	0	0	0	0	0
ENSG00000222020	lncRNA	HDAC4-AS1	0.827539	0.687368	2.62421	0	0	0.100276
ENSG00000222022	lncRNA	AC112721.1	0	0	0	0	0	0
ENSG00000222030	lncRNA	LINC01793	0	0	0	0	0	0.0603826
ENSG00000222031	lncRNA	AC023469.1	0	0	0.979982	0	0	0.26213
ENSG00000222032	lncRNA	AC112721.2	0	0	0	0	0	0
ENSG00000222033	lncRNA	LINC01124	0	0	0	0	0	0
ENSG00000222035	lncRNA	KIAA2012-AS1	0	0	0	0	0	0
ENSG00000222041	lncRNA	CYTOR	4.67342	3.57223	3.10425	1.65176	1.78038	2.08106
ENSG00000222042	lncRNA	AP001341.1	0	0	0	0	0	0
ENSG00000222043	lncRNA	AC079305.2	0	0	0.921065	0	0	0
ENSG00000222044	lncRNA	AL031587.1	0	0	0	0	0	0
ENSG00000223342	lncRNA	AL158817.1	0	0	0	0	0	0
ENSG00000223343	lncRNA	AC137630.1	0	0	0.293869	0	0	0
ENSG00000223344	lncRNA	AL359081.1	0	0	0	0	0	0
ENSG00000223351	lncRNA	ZNF385D-AS2	0	0	0	0	0	0
ENSG00000223356	lncRNA	AL590666.1	0	0	0	0	0.40416	0.851771
ENSG00000223358	lncRNA	EHHADH-AS1	0	0	0	0	0	0
ENSG00000223360	lncRNA	AC096559.1	0	0	0	0	0	0
ENSG00000223373	lncRNA	AC108066.1	0	0	0	0	0	0
ENSG00000223374	lncRNA	AC005104.1	0	0	2.59961	0.821352	0	0
ENSG00000223379	lncRNA	AL391987.3	0	0.856415	0	0	0	0
ENSG00000223381	lncRNA	LINC02661	0	0	0	0	0	0
ENSG00000223382	lncRNA	LINC01778	0	0	0	0	0	0
ENSG00000223387	lncRNA	LINC02068	0.138337	0	0	0.0495007	0	0
ENSG00000223390	lncRNA	AL445685.1	0	0	0	0	0.45932	0
ENSG00000223392	lncRNA	CLDN10-AS1	0	0	0	0	0	0
ENSG00000223393	lncRNA	AL118511.1	0	0	0	0.186748	0.270063	0.0316201
ENSG00000223400	lncRNA	AP006748.1	0	0	0	0	0	0
ENSG00000223403	lncRNA	MEG9	0.871804	1.0862	0.39494	0.389944	0.375942	0.396151
ENSG00000223404	lncRNA	LINC00397	0	0	0	0	0	0
ENSG00000223410	lncRNA	AL009050.1	0	0	0	0	0	0
ENSG00000223430	lncRNA	AC011243.1	0	0	0	0	0	0
ENSG00000223432	lncRNA	AC009988.1	0	0	0	0	0	0
ENSG00000223436	lncRNA	AC011625.1	0	0	0	0	0	0
ENSG00000223438	lncRNA	AC235097.1	0	0	0	0	0	0
ENSG00000223440	lncRNA	AL589642.1	0	0	0	0	0	0
ENSG00000223442	lncRNA	TH2LCRR	0	0	0	0	0	0
ENSG00000223446	lncRNA	AL451065.1	0	0	0	0	0	0
ENSG00000223458	lncRNA	LMO7DN-IT1	1.58032	0	0	0	0	0
ENSG00000223461	lncRNA	AC004471.1	0.871617	2.17194	0.394855	0	0	0.105618
ENSG00000223462	lncRNA	AL353801.1	0	0	0	0	0	0
ENSG00000223466	lncRNA	LINC01825	0	0	0	0	0	0
ENSG00000223469	lncRNA	AL157371.1	0	0	0	0	0	0
ENSG00000223470	lncRNA	LINC02629	0	0	0	0	0	0
ENSG00000223475	lncRNA	AC099681.1	0	0	0	0	0	0
ENSG00000223478	lncRNA	AL441992.2	7.46002	14.7165	8.44874	6.33981	6.43386	6.21474
ENSG00000223479	lncRNA	LINC02238	0	0	0	0	0	0
ENSG00000223482	lncRNA	NUTM2A-AS1	3.88617	3.32176	4.13511	3.15305	3.24249	3.34014
ENSG00000223485	lncRNA	LINC01615	0	0	0.204909	0	0	0.027405
ENSG00000223486	lncRNA	AC092198.1	0	0	0	0	0	0
ENSG00000223487	lncRNA	FRMPD4-AS1	0	0	0	0	0	0
ENSG00000223492	lncRNA	AL391097.1	0	0	0	0	0	0
ENSG00000223502	lncRNA	AL731537.1	0	0	0	0	0	0.146008
ENSG00000223504	lncRNA	AL646090.1	0	0	0	0	0	0
ENSG00000223511	lncRNA	AL683807.1	0	0	0	0	0	0
ENSG00000223516	lncRNA	AFF2-IT1	0	0	0	0	0	0
ENSG00000223517	lncRNA	AC010723.1	0	0	0	0	0	0
ENSG00000223522	lncRNA	AC093690.1	0	0	0	0.226828	0.109342	0.0768128
ENSG00000223523	lncRNA	AC092598.1	0	0	0	0	0	0
ENSG00000223525	lncRNA	RABGAP1L-IT1	0	0	0	0	0	0
ENSG00000223528	lncRNA	AL359094.1	0	0	0	0	0.0827233	0
ENSG00000223530	lncRNA	AC012506.1	0	0	0	0	0	0
ENSG00000223534	lncRNA	HLA-DQB1-AS1	0	0	0	0	0	0
ENSG00000223536	lncRNA	AC008164.1	0	0	0	0	0	0
ENSG00000223537	lncRNA	AL109947.1	0	0	0	0	0	0.0388555
ENSG00000223542	lncRNA	AL024497.1	0	0	0	0	0	0
ENSG00000223546	lncRNA	LINC00630	0.353999	0.183774	0.360826	0.285009	0.366367	0.600539
ENSG00000223548	lncRNA	ACSL6-AS1	0	0	0	0	0	0
ENSG00000223552	lncRNA	CCR5AS	0	0	0	0	0.26677	0.187407
ENSG00000223554	lncRNA	AC078851.1	0	0	0	0	0	0
ENSG00000223561	lncRNA	AC005165.1	0	0	0	0.0248792	0	0.0505505
ENSG00000223563	lncRNA	AP001599.1	0	0	0	0	0	0
ENSG00000223571	lncRNA	DHRSX-IT1	0	0.647245	0.353004	0	0	0
ENSG00000223576	lncRNA	AL355001.1	0	0	0	0	0	0
ENSG00000223581	lncRNA	LINC02665	0	0	0	0	0	0
ENSG00000223586	lncRNA	LINC01312	0	0	0	0	0	0
ENSG00000223587	lncRNA	LINC01986	0	0	0	0	0	0
ENSG00000223597	lncRNA	LINC02142	0	0	0	0	0	0
ENSG00000223598	lncRNA	AL138733.1	0	0	0	0	0	0
ENSG00000223608	lncRNA	DSCR4-IT1	0	0	0	0	0	0
ENSG00000223617	lncRNA	LINC00370	0.379418	0.945452	0.515645	0	0.261782	0.32183
ENSG00000223623	lncRNA	AL133268.2	0	0	0	0	0	0
ENSG00000223626	lncRNA	LINC01044	0	0	0	0	0	0
ENSG00000223631	lncRNA	LINC01120	0	0	0	0	0	0
ENSG00000223634	lncRNA	AC012506.2	0	0	0	0	0	0
ENSG00000223635	lncRNA	AL121990.1	0	0	0	0	0	0
ENSG00000223641	lncRNA	TTTY17C	0	0	0	0	0	0
ENSG00000223642	lncRNA	AC008277.1	0	0	0	0	0	0
ENSG00000223643	lncRNA	BX284668.1	0	0	0	0	0	0
ENSG00000223646	lncRNA	AC002463.1	0	0	0	0	0	0
ENSG00000223647	lncRNA	LINC01946	0	0	0	0	0	0
ENSG00000223649	lncRNA	AC105275.1	0	0	0	0	0	0
ENSG00000223652	lncRNA	AC106786.1	0	0	0	0	0	0
ENSG00000223653	lncRNA	AL078459.1	0.106371	0.26506	0.433687	0	0.0366956	0.0515575
ENSG00000223660	lncRNA	AC245052.1	0	0	0	0	0	0
ENSG00000223662	lncRNA	SAMSN1-AS1	0	0	0	0	0	0
ENSG00000223665	lncRNA	AC000058.1	0	0	0	0	0	0
ENSG00000223669	lncRNA	AL357033.2	0	0	0	0	0	0
ENSG00000223675	lncRNA	AC093117.1	0	0	0	0	0	0
ENSG00000223685	lncRNA	LINC00571	0	0	0.7314	1.15544	0.779763	0.665169
ENSG00000223692	lncRNA	DIP2A-IT1	0	0.984477	0	0	0	0.430861
ENSG00000223695	lncRNA	FO393418.1	0	0	0	0	0	0
ENSG00000223697	lncRNA	AF230666.1	0	0.852373	1.08472	0	0	0.373045
ENSG00000223701	lncRNA	RAET1E-AS1	0	0.696457	0	0.300031	0	0.812819
ENSG00000223704	lncRNA	LINC01422	0	0	0	0.0365413	0.0352292	0.0556845
ENSG00000223711	lncRNA	AC069213.1	0	0	0	0.17437	0.168109	0
ENSG00000223714	lncRNA	LINC02601	0	0	0	0	0	0
ENSG00000223715	lncRNA	LINC01208	0	0.0751215	0.0409709	0.0970862	0	0.0767135
ENSG00000223716	lncRNA	AL135785.1	0	0	0	0	0	0
ENSG00000223720	lncRNA	AL109659.1	0	0	0	0	0	0
ENSG00000223725	lncRNA	AC009226.1	0	0	0.178976	0.565479	0.954056	0.670228
ENSG00000223726	lncRNA	AL020994.1	0	0	0	0	0	0
ENSG00000223727	lncRNA	AC034195.1	0	0	0	0	0	0.0459757
ENSG00000223729	lncRNA	LINC02247	0	0	0	0	0	0
ENSG00000223732	lncRNA	AL359706.1	0	0	0	0	0	0
ENSG00000223734	lncRNA	LAPTM4A-DT	0	0	0	0	0	0
ENSG00000223742	lncRNA	AC112495.1	0	0	0	0	0	0
ENSG00000223745	lncRNA	CCDC18-AS1	2.8254	3.75493	3.32787	6.44155	7.04572	8.41243
ENSG00000223749	lncRNA	MIR503HG	4.89882	9.5412	8.64737	4.53344	5.24479	6.93911
ENSG00000223751	lncRNA	AC116609.1	0	0	0	0	0	0
ENSG00000223754	lncRNA	AC008073.1	0	0	0	0	0	0
ENSG00000223761	lncRNA	AL138767.2	0	0	0	0	0	0
ENSG00000223764	lncRNA	LINC02593	0.244355	0.507414	0.664179	0.0437184	0	0.103633
ENSG00000223765	lncRNA	LINC01626	0	0	0	0	0	0
ENSG00000223768	lncRNA	LINC00205	4.19461	4.20306	3.49881	5.31286	6.01789	5.26028
ENSG00000223770	lncRNA	CACNA2D1-AS1	0	0	0	0	0	0
ENSG00000223774	lncRNA	AL513217.1	0.756008	0.627953	0	0.27052	0.260806	0
ENSG00000223776	lncRNA	LGALS8-AS1	0.348168	0	0.157725	0.62292	0.240221	0.295323
ENSG00000223783	lncRNA	LINC01983	0	0	0	0	0	0.26074
ENSG00000223784	lncRNA	LINP1	5.05064	4.91139	4.01797	2.777	2.20982	3.10482
ENSG00000223786	lncRNA	AL357507.1	0	0	0	0	0	0
ENSG00000223791	lncRNA	UBE2E1-AS1	0	0.541589	0	0	0.449874	0
ENSG00000223795	lncRNA	AL669970.1	0	0	0	0	0	0
ENSG00000223797	lncRNA	ENTPD3-AS1	0.811261	1.21292	0.514518	0.464465	1.00752	0.50135
ENSG00000223799	lncRNA	IL10RB-DT	5.00906	0	0.618867	1.62943	3.77022	4.69022
ENSG00000223800	lncRNA	AL355314.1	0	0	0	0	0	0
ENSG00000223806	lncRNA	LINC00114	0	0	0	0	0	0
ENSG00000223808	lncRNA	AC044784.1	0	0	0.339447	0.268122	0	0
ENSG00000223809	lncRNA	AC234771.1	0	0	0	0	0	0
ENSG00000223811	lncRNA	AL589684.1	0	0	0	0	0	0
ENSG00000223812	lncRNA	AC073365.1	0	0	0	0	0	0
ENSG00000223813	lncRNA	AC007255.1	0	0.292406	0.159477	0.377902	0	0.17063
ENSG00000223814	lncRNA	AL691459.1	0	0	0	0	0	0
ENSG00000223815	lncRNA	DIAPH3-AS2	0	0	0	0	0	0
ENSG00000223817	lncRNA	CDH23-AS1	0	0	0	0	0	0
ENSG00000223821	lncRNA	AL603910.1	0	0	0	0	0	0
ENSG00000223823	lncRNA	LINC01342	0	0	0	0	0	0
ENSG00000223826	lncRNA	LINC01870	0	0	0	0	0	0
ENSG00000223829	lncRNA	AC004870.2	0	0	0	0	0	0.0385388
ENSG00000223831	lncRNA	AC005006.1	0	0	0	0	0	0
ENSG00000223834	lncRNA	AL161935.1	0	0	0	0	0	0
ENSG00000223837	lncRNA	AL645941.1	0	0	0	1.61111	0	0
ENSG00000223838	lncRNA	AC007091.1	0	0	0	0	0	0
ENSG00000223842	lncRNA	AL360093.1	0	0	0	0.161207	0	0.054591
ENSG00000223843	lncRNA	EFCAB6-AS1	0	0	0	0	0	0.0299632
ENSG00000223850	lncRNA	MYCNUT	0	0	0	0	0	0
ENSG00000223855	lncRNA	AC147651.1	0	0	0.112512	0.133306	0.17136	0.0451428
ENSG00000223859	lncRNA	AC007403.1	0	0	0	0	0	0
ENSG00000223863	lncRNA	LINC01805	0	0	0	0	0	0
ENSG00000223870	lncRNA	AP000233.1	0	0	0	0	0	0
ENSG00000223872	lncRNA	AC006372.1	0	0	0	0	0	0
ENSG00000223874	lncRNA	LINC01921	0	0	0	0	0	0
ENSG00000223880	lncRNA	LINC01078	0	0	0	0	0	0
ENSG00000223881	lncRNA	AL157402.1	0	0	0	0	0	0
ENSG00000223882	lncRNA	ABCC5-AS1	0	0	0.489991	0	0	0
ENSG00000223883	lncRNA	LINC01707	0	0	0	0.0295057	0.0284462	0
ENSG00000223884	lncRNA	AC068481.1	0	0	0	0	0	0
ENSG00000223891	lncRNA	OSER1-DT	0.384346	0.136819	0.248734	0.117882	0.208357	0.212904
ENSG00000223901	lncRNA	AP001469.1	0	0	0.617204	0	0.313341	0.66037
ENSG00000223906	lncRNA	AC104457.2	0	0	0	0	0	0
ENSG00000223910	lncRNA	ZNF32-AS3	0	0	0	0	0	0
ENSG00000223911	lncRNA	AC009480.1	0	0	0	0	0	0
ENSG00000223914	lncRNA	LINC02471	0	0	0	0	0.0292058	0
ENSG00000223923	lncRNA	AC010136.1	0	0	0	0.264348	0.084952	0.417754
ENSG00000223930	lncRNA	AC117453.1	0	0	0	0	0	0
ENSG00000223935	lncRNA	LGALSL-DT	0.158674	0	0	0.170334	0.109478	0.211499
ENSG00000223941	lncRNA	LINC01014	0	0	0.397588	0	0	0.638091
ENSG00000223942	lncRNA	AL590302.1	0	0	0	0	0	0
ENSG00000223944	lncRNA	AL353604.1	0	0	0	0	0	0
ENSG00000223946	lncRNA	AL513008.1	0	0	0	0	0	0
ENSG00000223947	lncRNA	AC016738.1	0	0	0.0659414	0.572943	0.401724	0.546787
ENSG00000223949	lncRNA	ROR1-AS1	0	0	0	0.0511898	0.0493517	0.0693395
ENSG00000223956	lncRNA	LINC01767	0	0	0	0	0.0794376	0
ENSG00000223960	lncRNA	CHROMR	2.17817	1.69374	1.8895	1.98998	1.71068	1.54432
ENSG00000223966	lncRNA	AL159990.1	0	0	0	0	0	0
ENSG00000223969	lncRNA	AC002456.1	0	0	0.0517348	0.367778	0.196985	0.345956
ENSG00000223975	lncRNA	AP001048.1	0	0	0	0	0	0
ENSG00000223979	lncRNA	SMCR2	0	0	0.407457	0	0	0
ENSG00000223985	lncRNA	LINC01874	0	0	0.377349	0	0	0
ENSG00000223989	lncRNA	AL357140.1	0	0	0	0	0	0
ENSG00000223991	lncRNA	AC104809.1	0	0	0	0	0	0
ENSG00000223993	lncRNA	LINC02647	0	0	0	0	0	0
ENSG00000223999	lncRNA	AC244250.1	0	0	0	0	0	0
ENSG00000224000	lncRNA	Z97198.1	0	0.640359	0	0.275865	0	0
ENSG00000224008	lncRNA	LINC01441	0	0	0	0	0	0
ENSG00000224015	lncRNA	AC063976.1	0	0	0	0	0	0
ENSG00000224017	lncRNA	LINC01449	0.205543	0	0	0.073549	0	0.0249066
ENSG00000224018	lncRNA	AP000470.1	0	0	0	0	0	0
ENSG00000224020	lncRNA	MIR181A2HG	2.29886	5.72841	2.42997	0.548395	1.85046	1.0214
ENSG00000224023	lncRNA	EDRF1-DT	0.886855	0.85941	0.468718	0.264451	0.560901	0.985087
ENSG00000224027	lncRNA	AL133456.1	0	0	0	0	0	0
ENSG00000224028	lncRNA	LINC01853	0	0	0	0	0	0
ENSG00000224029	lncRNA	AL450344.1	0	0	0	0	0	0
ENSG00000224031	lncRNA	TCEAL3-AS1	0	0	0	0	0	0
ENSG00000224032	lncRNA	EPB41L4A-AS1	17.1563	17.597	17.7227	6.74359	7.66723	5.60674
ENSG00000224034	lncRNA	LINC02561	0	0	1.66045	0.262311	0.505784	0.710629
ENSG00000224038	lncRNA	BX005214.1	0	0	0	0	0	0
ENSG00000224043	lncRNA	CCNT2-AS1	0.686177	1.62843	1.15458	1.19259	1.4203	0.831471
ENSG00000224046	lncRNA	AC005076.2	0.55868	0.928098	1.26545	0.199911	1.34913	1.08316
ENSG00000224048	lncRNA	LINC02612	0	0.125853	0	0	0	0.0550801
ENSG00000224049	lncRNA	AC108681.1	0	0	0	0	0	0
ENSG00000224057	lncRNA	EGFR-AS1	0.361569	0	0.491388	0.646896	0.311834	0.591474
ENSG00000224063	lncRNA	AC007319.1	0	0	0.62926	0	0.0958385	0.336634
ENSG00000224066	lncRNA	AL049795.1	0	0	0	0.401295	0	0
ENSG00000224074	lncRNA	LINC00691	0	0.122274	0	0	0.0507838	0.0713516
ENSG00000224075	lncRNA	TTTY22	0	0	0	0	0	0
ENSG00000224076	lncRNA	AC009487.1	0	0	0	0	0	0
ENSG00000224077	lncRNA	AP000936.1	0	0	0	0	0	0
ENSG00000224078	lncRNA	SNHG14	1.4274	1.64612	1.88367	1.68033	1.82981	1.86099
ENSG00000224079	lncRNA	AC091729.1	0	0	0	0	0	0
ENSG00000224086	lncRNA	PPM1F-AS1	0.294651	0.300365	0.394376	0.239623	0.258741	0.274272
ENSG00000224087	lncRNA	POTEF-AS1	0	0	0	0	0	0
ENSG00000224090	lncRNA	AC097468.1	0	0	0	0	0	0
ENSG00000224091	lncRNA	AC104389.2	0	0	0	0	0	0
ENSG00000224093	lncRNA	BCAR3-AS1	0	0	0.235216	0.0928961	0.179121	0.251666
ENSG00000224095	lncRNA	LINC01935	0	0	0	0	0	0
ENSG00000224099	lncRNA	AC104823.1	0	0	0	0	0	0
ENSG00000224100	lncRNA	AP001630.1	0	0	0	0	0	0
ENSG00000224101	lncRNA	ELMO1-AS1	0	0	0	0	0	0
ENSG00000224116	lncRNA	INHBA-AS1	0	0	0	0.158062	0.335251	0.149873
ENSG00000224122	lncRNA	POU6F2-AS1	0	0	0	0	0	0
ENSG00000224127	lncRNA	AC099786.1	0	0	0	0	0	0
ENSG00000224128	lncRNA	LINC01248	0	0	0	0	0	0
ENSG00000224132	lncRNA	AC112715.1	0	0	0	0	0	0
ENSG00000224137	lncRNA	LINC01857	0	0	0	0	0	0
ENSG00000224138	lncRNA	AC000123.1	0	1.63316	1.78144	0.703562	0.339149	0
ENSG00000224141	lncRNA	MIR548XHG	0	0	0	0	0	0
ENSG00000224142	lncRNA	AMMECR1-IT1	0	0	0	0	0	0
ENSG00000224149	lncRNA	AC099786.2	0	0	0	0	0	0
ENSG00000224152	lncRNA	AC009506.2	3.39546	1.41016	1.84583	0.85049	0.819952	1.11089
ENSG00000224153	lncRNA	LINC02054	0	0.103833	0	0	0	0.0151477
ENSG00000224157	lncRNA	HCG14	0	0	0	0	0	0.148836
ENSG00000224164	lncRNA	LINC02828	0	0	0	0	0	0
ENSG00000224165	lncRNA	DNAJC27-AS1	0.0876588	0.145622	0.0397107	0.219567	0	0.0637319
ENSG00000224167	lncRNA	LINC01357	0	1.06135	3.18371	2.74336	1.76324	1.85802
ENSG00000224173	lncRNA	LINC02831	0.144896	0	0	0	0	0
ENSG00000224174	lncRNA	AL137802.1	0	0	0	0	0	0
ENSG00000224177	lncRNA	LINC00570	0	0	0	0	0	0
ENSG00000224184	lncRNA	MIR3681HG	0	0	0	0	0	0
ENSG00000224186	lncRNA	C5orf66	0.305132	1.14051	1.52052	2.67502	2.78949	2.37559
ENSG00000224187	lncRNA	LINC01991	0	0	0	0	0	0
ENSG00000224189	lncRNA	HAGLR	0	0	0.0897679	0	0	0
ENSG00000224190	lncRNA	LINC02667	0	0	0	0	0	0
ENSG00000224192	lncRNA	AL080273.1	0	0	0	0	0	0
ENSG00000224194	lncRNA	AC008278.1	0	0	0	0	0	0
ENSG00000224195	lncRNA	AC022400.1	0	0	0.516417	0.407908	0.393261	0.414401
ENSG00000224204	lncRNA	PHEX-AS1	0	0	0	0	0	0
ENSG00000224209	lncRNA	LINC00466	0	0	0	0	0	0
ENSG00000224215	lncRNA	AL606469.1	0	0	0	0	0	0
ENSG00000224216	lncRNA	AC234781.1	0	0	0	0	0.305057	0.285738
ENSG00000224218	lncRNA	AC107072.1	0	0	0	0	0	0
ENSG00000224220	lncRNA	DTNB-AS1	0	0	0	0	0	0
ENSG00000224222	lncRNA	LINC02636	0	0	0	0	0	0
ENSG00000224223	lncRNA	VSTM2A-OT1	0	0	0	0	0	0
ENSG00000224228	lncRNA	AL031599.1	0	0	0	0	0	0
ENSG00000224231	lncRNA	LINC01832	0	0	0	0	0	0
ENSG00000224238	lncRNA	WARS2-IT1	0	0	0.111556	0	0	0.0596791
ENSG00000224239	lncRNA	AC090044.1	0	0	0	0	0.70423	0
ENSG00000224243	lncRNA	SOX1-OT	0	0	0	0	0	0
ENSG00000224247	lncRNA	AJ009632.1	0	0	0	0	0	0
ENSG00000224250	lncRNA	AC025947.1	0	0	0	0	0	0
ENSG00000224251	lncRNA	AL391427.1	0	0	0.953551	0.376595	1.08922	1.53036
ENSG00000224257	lncRNA	VWC2L-IT1	0	0	0	0	0	0
ENSG00000224259	lncRNA	LINC01133	39.8815	25.9049	22.9431	18.4679	17.8524	23.5443
ENSG00000224260	lncRNA	AL023754.1	0.474538	1.18248	1.93475	0.509408	1.30964	0.517516
ENSG00000224265	lncRNA	LINC02633	0	0	0	0	0	0
ENSG00000224267	lncRNA	AL772155.1	0	0	0	0	0	0
ENSG00000224269	lncRNA	AP000697.1	0	0	0	0	0	0
ENSG00000224271	lncRNA	AL117329.1	0	0	0	0	0	0
ENSG00000224272	lncRNA	AC131097.2	0	0	0	0	0	0
ENSG00000224276	lncRNA	ARHGEF2-AS1	0	0	0	0	0	0
ENSG00000224277	lncRNA	AP000345.1	0	0	0	0	0	0
ENSG00000224281	lncRNA	SLC25A5-AS1	0.645601	0.670309	0.292467	0.17326	0.222719	0.312921
ENSG00000224286	lncRNA	LINC01142	0	0	0	0	0	0
ENSG00000224292	lncRNA	AF196972.1	0.776847	0	0.351923	0	0.267996	0
ENSG00000224294	lncRNA	PINCR	0	0	0	0	0	0
ENSG00000224301	lncRNA	AL590502.1	0	0	0	0	0	0
ENSG00000224307	lncRNA	AL161785.1	0.426287	0	0.579342	0.457611	0.14706	0.61986
ENSG00000224308	lncRNA	LINC01527	0	0.210995	0	0	0.087632	0.0923427
ENSG00000224310	lncRNA	LINC01567	0	0	0	0	0	0
ENSG00000224311	lncRNA	AL590640.1	0	0	0	0	0	0
ENSG00000224318	lncRNA	CHL1-AS2	0	0	0	0.0469284	0	0
ENSG00000224322	lncRNA	AC004009.1	0	0	0	0	0	0
ENSG00000224326	lncRNA	AL136234.1	0	0	0	0	0	0
ENSG00000224328	lncRNA	MDC1-AS1	0	0	0	0	0	0.499752
ENSG00000224329	lncRNA	LINC00297	0	0	0	0	0	0
ENSG00000224330	lncRNA	AC005019.2	0	0	0	0	0	0
ENSG00000224342	lncRNA	AC007879.1	0	0	0	0	0	0
ENSG00000224347	lncRNA	SCEL-AS1	0	0	0	0	0	0
ENSG00000224349	lncRNA	FAM135A-AS1	0	0	0	1.04022	0	0
ENSG00000224356	lncRNA	AL356966.1	0	0	0.0632203	0.199746	0.0962867	0.152194
ENSG00000224358	lncRNA	TMCO1-AS1	0	0	0.213773	0	0.244188	0.114362
ENSG00000224359	lncRNA	AL358176.1	0	0	0	0	0	0
ENSG00000224361	lncRNA	AC011239.1	0	0	0	0.31082	0	0
ENSG00000224363	lncRNA	FP700111.1	0	0	0	0	0	0
ENSG00000224371	lncRNA	AL391361.2	0	0.945805	0	0	0	0
ENSG00000224374	lncRNA	AL023693.1	0	0	0	0	0	0
ENSG00000224375	lncRNA	AC009276.1	0	0	0	0	0	0
ENSG00000224376	lncRNA	AC017104.1	0.317646	0.791527	0.143898	0	0.219162	0.885283
ENSG00000224382	lncRNA	LINC00703	0	0	0	0	0	0
ENSG00000224384	lncRNA	AL033379.1	0	0	0	0	0	0
ENSG00000224387	lncRNA	AL139246.1	1.1149	0	0	0.797885	0	1.48607
ENSG00000224388	lncRNA	BACE2-IT1	0	0	0	0	0.916236	0
ENSG00000224391	lncRNA	LINC01280	0	0	0	0	0	0
ENSG00000224394	lncRNA	GPC6-AS2	0	0	0	0	0	0
ENSG00000224397	lncRNA	SMIM25	0	0	0	0.196502	0.118404	0.116451
ENSG00000224400	lncRNA	AC010880.1	0	0	0	0	0	0
ENSG00000224404	lncRNA	Z68323.1	0	0	0	0	0	0
ENSG00000224405	lncRNA	LINC00572	0	0	0	0	0	0
ENSG00000224406	lncRNA	LINC02052	0	0	0	0	0	0
ENSG00000224407	lncRNA	AL136988.1	0	0	0	0	0	0
ENSG00000224409	lncRNA	AC114489.2	0	0	0	1.37862	1.77216	1.71181
ENSG00000224413	lncRNA	AP001476.1	0	0	0	0	0	0
ENSG00000224417	lncRNA	AL606970.1	0	0	0	0	0	0
ENSG00000224418	lncRNA	STK24-AS1	0.396934	0	0	0.284067	0	0.336687
ENSG00000224424	lncRNA	PRKAR2A-AS1	0	0.477728	0.208441	0.288125	0.238097	0.292712
ENSG00000224429	lncRNA	LINC00539	0.117399	0	0.212734	0.0420085	0.0810003	0.0853545
ENSG00000224445	lncRNA	LINC01708	0	0	0	0	0	0
ENSG00000224459	lncRNA	SLC25A34-AS1	0	0	0.719267	0	0	0
ENSG00000224467	lncRNA	AC009313.1	0	0	0	0	0	0
ENSG00000224468	lncRNA	LAMC1-AS1	0	0	0	0	0	0
ENSG00000224477	lncRNA	AL109933.1	0	0	0	0	0	0
ENSG00000224478	lncRNA	AL356417.1	0	0	0	0	0	0.048306
ENSG00000224481	lncRNA	AC245100.1	0	0	0	0	0	0.054462
ENSG00000224490	lncRNA	TTC21B-AS1	0	0	0	0	0	0
ENSG00000224500	lncRNA	AL731575.1	0	0	0	0	0	0
ENSG00000224504	lncRNA	AC025428.1	0	0	0	0	0	0
ENSG00000224505	lncRNA	AC138150.1	0	0	0	0	0.251438	0
ENSG00000224506	lncRNA	LINC02523	0	0	0	0	0	0
ENSG00000224509	lncRNA	MRPS9-AS2	0	0	0	0	0	0
ENSG00000224511	lncRNA	LINC00365	0.399539	0.553106	0.120665	0.571863	0.321609	0.806897
ENSG00000224513	lncRNA	AC109309.1	0	0	0	0	0	0
ENSG00000224514	lncRNA	LINC00620	0	0	0	0	0	0
ENSG00000224515	lncRNA	AL590385.1	0	0	0	0	0	0
ENSG00000224516	lncRNA	AC068134.1	0	0	0	0	0	0
ENSG00000224517	lncRNA	HTR2A-AS1	0	0	0	0	0	0
ENSG00000224521	lncRNA	AC098483.2	0	0	0	0	0	0
ENSG00000224525	lncRNA	AL591686.1	0	0	0	1.42182	0.913844	1.28396
ENSG00000224532	lncRNA	AL136361.1	0	0	0	0	0	0
ENSG00000224533	lncRNA	TMLHE-AS1	0	0	0	0.196768	0	0.0999503
ENSG00000224535	lncRNA	LINC02771	0	0	0	0	0	0
ENSG00000224536	lncRNA	AC096677.1	0	0.27794	0.303174	0.239471	1.03892	0.446018
ENSG00000224541	lncRNA	AP001439.1	0	0	0	0.463058	0	0
ENSG00000224549	lncRNA	AC017067.1	0	0.942632	0	0.406083	1.1745	0.962609
ENSG00000224559	lncRNA	LINC01087	0	0	0	0	0	0
ENSG00000224563	lncRNA	LPP-AS1	0	0	0	0	0	0
ENSG00000224565	lncRNA	LINC01754	0	0	0	0	0	0
ENSG00000224568	lncRNA	LINC01886	0	0	0	0	0	0
ENSG00000224574	lncRNA	COL18A1-AS2	0	0	0	0	0	0
ENSG00000224577	lncRNA	LINC01117	0.265037	0.440289	0.240131	0	0.0914321	0.0321157
ENSG00000224582	lncRNA	LINC01015	0	0	0	0	0	0
ENSG00000224583	lncRNA	AL356277.2	0	0	0	0	0	0
ENSG00000224592	lncRNA	MIR3659HG	0	0	0.671947	0	0.25585	0.179735
ENSG00000224595	lncRNA	AC073626.1	0	0	0	0	0	0
ENSG00000224596	lncRNA	ZMIZ1-AS1	0	0	0.0449542	0.106525	0.1027	0.0120245
ENSG00000224605	lncRNA	AL080284.1	0	0	0	0	0	0
ENSG00000224606	lncRNA	TGFA-IT1	0	0	0.527077	0	0	0
ENSG00000224609	lncRNA	AC093425.1	0	0	0.0303134	0	0.0692525	0.0648668
ENSG00000224610	lncRNA	AC108879.1	0	0	0	0	0	0
ENSG00000224612	lncRNA	AC011901.1	0	0	0	0	0	0
ENSG00000224613	lncRNA	AC095032.1	0	0.151895	0.248528	0.0654358	0	0
ENSG00000224614	lncRNA	TNK2-AS1	0.536238	0.148469	0.0809746	0.12792	0.123327	0.0433188
ENSG00000224616	lncRNA	RTCA-AS1	0.101112	0.335943	0.435151	1.08542	0.8546	1.04144
ENSG00000224621	lncRNA	AL451042.1	0	0	1.26731	1.00102	0.321693	1.01696
ENSG00000224626	lncRNA	AC106053.1	0	0	0	0	0	0
ENSG00000224635	lncRNA	AL391095.2	0.554204	0.613775	0.585812	0.132206	0.446106	0.246236
ENSG00000224643	lncRNA	AC064871.3	0	0	0	0	0	0
ENSG00000224644	lncRNA	AL135787.1	0	0	0	0	0	0
ENSG00000224645	lncRNA	AL391069.1	0	0	0	0	0	0
ENSG00000224648	lncRNA	LINC01627	0	0	0	0	0	0
ENSG00000224649	lncRNA	AF124730.2	0	0	0	0	0	0
ENSG00000224652	lncRNA	LINC00885	0.215773	0	0.293244	0.463255	0.372184	0.0784383
ENSG00000224655	lncRNA	LINC01823	0	0	0	0	0	0
ENSG00000224658	lncRNA	AL513164.1	0	0	0	0	0	0
ENSG00000224660	lncRNA	SH3BP5-AS1	3.09813	2.08319	2.27233	3.66891	3.84254	3.90609
ENSG00000224661	lncRNA	AC010907.1	0	0	0	0	0	0
ENSG00000224666	lncRNA	ETV7-AS1	0	0	0	0	0	0
ENSG00000224671	lncRNA	AC105940.1	0	0	0	0	0	0
ENSG00000224675	lncRNA	AC009227.1	0	0	0	0	0	0
ENSG00000224687	lncRNA	RASAL2-AS1	0.636688	0.528844	0.865287	0.170868	0.109822	0.192876
ENSG00000224691	lncRNA	AL133553.1	0	0	0	0	0	0
ENSG00000224698	lncRNA	AL390038.1	0	0	0	0	0	0
ENSG00000224699	lncRNA	LAMTOR5-AS1	0.160354	0.133193	0.163446	0.215172	0.165956	0.102012
ENSG00000224700	lncRNA	AP000844.1	0	0	0	0	0	0
ENSG00000224702	lncRNA	LMX1A-AS2	0	0	0	0	0	0
ENSG00000224707	lncRNA	E2F3-IT1	0	1.05339	0	0	0	0
ENSG00000224711	lncRNA	LINC01706	0	0	0	0	0	0
ENSG00000224713	lncRNA	AC025165.1	0	0	0	0.069815	0	0.0472842
ENSG00000224714	lncRNA	LINC02671	0	0	0	0	0	0
ENSG00000224715	lncRNA	Z82186.1	0	0	0	0	0	0
ENSG00000224717	lncRNA	LEMD1-DT	0	0	0	0	0	0
ENSG00000224718	lncRNA	LINC01657	0	0	0	0	0	0
ENSG00000224721	lncRNA	AC007182.1	0	0	0	0	0	0
ENSG00000224729	lncRNA	PCOLCE-AS1	0	0	0.140769	0.0555954	0.0535991	0
ENSG00000224730	lncRNA	LILRB1-AS1	0	0	0	0	0	0
ENSG00000224731	lncRNA	AC016716.1	0	0	0	0	0	0
ENSG00000224733	lncRNA	AL034349.1	0	0	0	0	0	0
ENSG00000224738	lncRNA	AC099850.2	1.51654	1.88949	0.687013	0.271329	0.523172	0
ENSG00000224739	lncRNA	AC016735.1	0	0	0	0	0	0
ENSG00000224743	lncRNA	TEX26-AS1	0	0	0.0352896	0	0	0
ENSG00000224745	lncRNA	AC063965.2	0	0	0.460533	0	0	0
ENSG00000224746	lncRNA	AC015987.1	0	0	0	0	0	0
ENSG00000224750	lncRNA	AL391704.1	0	0	0.0670966	0	0	0.0358946
ENSG00000224758	lncRNA	LINC01167	0	0	0	0	0	0
ENSG00000224764	lncRNA	AL353768.1	0	0	0	0	1.07804	0
ENSG00000224765	lncRNA	AL035443.1	0	0	0	0	0	0
ENSG00000224771	lncRNA	ATP2B2-IT2	0	0	0	0	0	0
ENSG00000224788	lncRNA	LINC02670	0	0	0	0	0	0
ENSG00000224789	lncRNA	AC012363.2	0	0	0	0	0	0
ENSG00000224790	lncRNA	AP000704.2	0	0.0955023	0.15626	0	0.0396648	0.195053
ENSG00000224794	lncRNA	AL022326.1	0	0	0	0	0	0
ENSG00000224795	lncRNA	NTM-AS1	0	0	0	0	0	0
ENSG00000224799	lncRNA	AL139397.1	0	0	0	0	0	0
ENSG00000224805	lncRNA	LINC00853	0	0	0.347664	0.274613	0.529504	0.464973
ENSG00000224808	lncRNA	SRGAP3-AS1	0	0	0	0	0	0
ENSG00000224810	lncRNA	AL355482.1	0	0	0	0.0736983	0	0.0249571
ENSG00000224812	lncRNA	TMEM72-AS1	0	0	0	0	0.0162459	0
ENSG00000224814	lncRNA	AC114812.2	0	0	0	0	0	0
ENSG00000224817	lncRNA	AC010789.1	0	0	0	0	0	0
ENSG00000224818	lncRNA	AC096677.2	0	0	0	0	0	0
ENSG00000224819	lncRNA	AC093843.1	0	0	0.0819272	0.0431417	0.062389	0.0511332
ENSG00000224821	lncRNA	COL4A2-AS2	0	0	0	0	0	0
ENSG00000224822	lncRNA	THRB-IT1	0	0	0	0	0	0
ENSG00000224825	lncRNA	RORB-AS1	0	0	0	0	0	0
ENSG00000224832	lncRNA	LINC01689	0	0	0	0	0	0
ENSG00000224842	lncRNA	AL161908.1	0	0	0	0	0	0
ENSG00000224843	lncRNA	LINC00240	0.180784	0.300325	0.272993	0.237195	0.145522	0.109532
ENSG00000224844	lncRNA	AC107079.1	0	0	0	0	0	0
ENSG00000224846	lncRNA	NQO2-AS1	0	0	0	0	0	0.210656
ENSG00000224848	lncRNA	AL589843.1	0.151247	0.125628	0.0685169	0.0541201	0.208707	0.109963
ENSG00000224851	lncRNA	LINC00502	0	0	0	0	0	0
ENSG00000224853	lncRNA	LINC00393	0	0	0.228617	0	0	0.195685
ENSG00000224854	lncRNA	CDKN2A-DT	0	0	0.279229	0	0	0
ENSG00000224855	lncRNA	OPA1-AS1	0	0	0	0	0	0
ENSG00000224857	lncRNA	LINC01691	0	0	0	0	0	0
ENSG00000224863	lncRNA	LINC01398	0	0.238864	0	0	0.198414	0
ENSG00000224865	lncRNA	AC009518.1	0	0	0	0	0	0
ENSG00000224870	lncRNA	MRPL20-AS1	14.0521	17.5079	14.8232	11.7804	9.27984	10.8733
ENSG00000224875	lncRNA	EML4-AS1	0	0	0	0	0	0.129819
ENSG00000224876	lncRNA	AL121901.1	0	0	0	0	0	0
ENSG00000224879	lncRNA	AC011754.1	0	0	0	0	0	0
ENSG00000224883	lncRNA	Z99716.1	0	0	0	0	0	0
ENSG00000224884	lncRNA	AC034187.1	0	0	0	0	0	0
ENSG00000224885	lncRNA	EIPR1-IT1	0	1.17369	0	0	0.487468	0
ENSG00000224888	lncRNA	AC138028.2	1.37475	0.439187	0.383249	0.1892	0.0364814	0.269097
ENSG00000224893	lncRNA	LINC02840	0	0	0	0	0.0365958	0
ENSG00000224897	lncRNA	POT1-AS1	0.0589382	0.0734326	0.146849	0.0949036	0.101662	0.0428508
ENSG00000224899	lncRNA	LINC02830	0	0	0	0	0	0
ENSG00000224901	lncRNA	AL365258.2	0	0	0	0	0	0
ENSG00000224903	lncRNA	AC005534.1	0.239736	0	0.27151	0.042892	0.289463	0.159774
ENSG00000224905	lncRNA	AP001347.1	0.282293	0	0.383649	0.202024	0.389541	0.239447
ENSG00000224910	lncRNA	LINC01766	0	0	0	0	0	0
ENSG00000224914	lncRNA	LINC00863	4.38082	3.11896	4.25266	3.13515	4.4105	4.07341
ENSG00000224918	lncRNA	AC066595.1	0	0	0	0	0	0
ENSG00000224919	lncRNA	AL591684.1	0	0	0	0	0	0
ENSG00000224922	lncRNA	AL050303.1	0	0	0	0	0	0
ENSG00000224924	lncRNA	LINC00320	0	0	0	0	0	0
ENSG00000224932	lncRNA	LINC02262	0	0	0	0	0	0
ENSG00000224933	lncRNA	LINC01034	0	0	0	0	0	0
ENSG00000224934	lncRNA	AL391684.1	0.118871	0.0987361	0.0807753	0.127606	0.0820157	0.158445
ENSG00000224935	lncRNA	AL589678.1	0	0	0	0	0	0
ENSG00000224939	lncRNA	LINC00184	0.446944	0.371239	0.101236	0.479786	0.539651	0.649897
ENSG00000224943	lncRNA	LINC02819	0	0	0	0	0	0
ENSG00000224944	lncRNA	CASC6	0	0	0	0	0	0
ENSG00000224945	lncRNA	AL353150.1	0.48871	0.405931	1.32836	0.524621	0.674378	1.36204
ENSG00000224950	lncRNA	AL390066.2	0.440731	1.09824	0.79863	0.86738	0.988277	0.907889
ENSG00000224957	lncRNA	LINC01266	0	0	0	0	0.0147643	0
ENSG00000224958	lncRNA	PGM5-AS1	0	0	0	0	0	0.0261017
ENSG00000224961	lncRNA	LINC01752	1.63463	2.26292	1.72786	0.389944	1.12783	0.528201
ENSG00000224965	lncRNA	LINC02586	0	0	0	0	0	0
ENSG00000224968	lncRNA	LINC01645	0	0	0	0	0	0
ENSG00000224969	lncRNA	AL645608.1	0	0	0	0	0.371552	0
ENSG00000224970	lncRNA	AC245427.1	0	0	0	0	0	0
ENSG00000224972	lncRNA	AL513412.1	0	0	0	0	0	0
ENSG00000224973	lncRNA	LARGE-AS1	0	0	0	0	0	0
ENSG00000224975	lncRNA	INE1	0.536806	4.01292	3.40453	3.4575	4.81485	5.20376
ENSG00000224977	lncRNA	LINC02776	0	0	0	0	0	0
ENSG00000224984	lncRNA	AL512363.1	0	1.43808	0.39216	0.309759	0.597273	0.31469
ENSG00000224985	lncRNA	AL590714.1	18.7386	18.8999	22.4349	13.4104	7.84965	9.40693
ENSG00000224989	lncRNA	FAM41AY1	0	0	0	0	0	0
ENSG00000224992	lncRNA	AL445645.1	0	0.4135	0	0	0	0.0603233
ENSG00000224995	lncRNA	LINC01526	0	0	0	0	0	0
ENSG00000225000	lncRNA	AC010082.1	0	0	0	0	0	0
ENSG00000225002	lncRNA	AL732323.1	0	0	0	0	0	0
ENSG00000225006	lncRNA	AL929288.1	0	0	0	0	0	0
ENSG00000225007	lncRNA	AC000067.1	0	0	0	0	0	0
ENSG00000225012	lncRNA	AL121872.1	0	0	0	0	0	0
ENSG00000225028	lncRNA	AC096541.1	0.280731	0	0	0.100453	0	0
ENSG00000225032	lncRNA	AL162586.1	0.225759	0.562559	1.12499	0.565479	1.01247	0.820687
ENSG00000225037	lncRNA	EIF1AX-AS1	0	0	0	0	0	0
ENSG00000225039	lncRNA	LINC01058	0	0	0	0	0.390627	0
ENSG00000225044	lncRNA	AC018814.1	0	0	0	0	0	0
ENSG00000225050	lncRNA	AL355592.1	0	0	0	0	0	0
ENSG00000225056	lncRNA	AL121894.1	0	0	0	0	0	0
ENSG00000225057	lncRNA	AC012485.1	0	0	0	0	0	0
ENSG00000225058	lncRNA	AC092941.1	0	0	0	0	0	0
ENSG00000225062	lncRNA	CATIP-AS1	0	0	0.593047	0	0	0
ENSG00000225063	lncRNA	AC093422.2	0	0	0	0	0	0
ENSG00000225064	lncRNA	LINC01802	0	0	0	0	0	0
ENSG00000225075	lncRNA	AL603832.1	0	0	0	0.404274	0	0.273806
ENSG00000225076	lncRNA	WWC3-AS1	0	0	0	0	0	0
ENSG00000225077	lncRNA	LINC00337	0.215132	0	0	0.07698	0.222648	0.0260685
ENSG00000225083	lncRNA	GRTP1-AS1	0	0	0	0	0	0.0830107
ENSG00000225084	lncRNA	AL450226.1	0	0	0	0	0	0
ENSG00000225085	lncRNA	AL162726.1	0	0	0	0	0	0
ENSG00000225087	lncRNA	AL583808.1	0	0	0	0	0	0
ENSG00000225092	lncRNA	AL355336.2	0	0	0	0	0.104416	0
ENSG00000225096	lncRNA	AL445250.1	0.0506471	0	0.0229439	0.0181229	0	0.006137
ENSG00000225102	lncRNA	AL157373.1	0	0	0	0	0	0
ENSG00000225105	lncRNA	LINC01076	0	0	0	0	0	0
ENSG00000225106	lncRNA	AL162457.2	0	0	0	0	0	0.226992
ENSG00000225107	lncRNA	AC092484.1	0	0	0	0	0	0
ENSG00000225111	lncRNA	AC083900.1	0	0	0	0	0	0
ENSG00000225112	lncRNA	AL157392.1	0	0	0	0	0	0
ENSG00000225113	lncRNA	AL355310.1	0	0	0	0	0	0
ENSG00000225126	lncRNA	CAMTA1-AS1	0	0	0	0	0	0
ENSG00000225127	lncRNA	LINC00237	0	0	0	0	0	0
ENSG00000225128	lncRNA	LINC00972	0	0	0	0	0	0
ENSG00000225129	lncRNA	AL035250.1	0	0	0	0	0	0
ENSG00000225138	lncRNA	SLC9A3-AS1	12.4381	15.586	12.9208	7.82707	5.10466	6.37952
ENSG00000225140	lncRNA	AL358216.1	0	0	0	0	0	0
ENSG00000225144	lncRNA	AC018643.1	0	0	0	0	0	0
ENSG00000225146	lncRNA	AC073957.1	0	0	0	0	0	0
ENSG00000225148	lncRNA	AL050338.1	0	0	0	0	0	0
ENSG00000225152	lncRNA	AL160290.1	0	0	0	0	0	0
ENSG00000225156	lncRNA	AC012354.1	0	0	0	0	0	0
ENSG00000225163	lncRNA	LINC00618	0	0	0	0	0.250002	0.175627
ENSG00000225166	lncRNA	AC012462.1	0	0	0	0	0	0.0749171
ENSG00000225172	lncRNA	AC096631.1	0	0	0	0	0	0
ENSG00000225173	lncRNA	AL662890.1	0	0	0.648253	0.512042	0	0.260096
ENSG00000225174	lncRNA	OSTM1-AS1	0	0	0	0	0	0
ENSG00000225177	lncRNA	AL590617.2	2.69115	2.39498	4.09279	1.2381	1.06101	1.30439
ENSG00000225179	lncRNA	LINC00457	0	0	0	0	0	0
ENSG00000225181	lncRNA	AL121584.1	0	0	0	0	0	0
ENSG00000225187	lncRNA	AC073283.1	0	0	0	0.211068	0	0.0714761
ENSG00000225194	lncRNA	LINC00092	0	0	0	0	0	0
ENSG00000225195	lncRNA	AC078962.2	0	0	0	0	0	0
ENSG00000225203	lncRNA	AL139230.1	0	0	0	0	0	0
ENSG00000225205	lncRNA	AC078883.1	3.31692	2.92728	3.09914	2.81885	2.5746	2.8386
ENSG00000225206	lncRNA	MIR137HG	0	0.0877917	0.0718218	0.0189102	0.0729247	0
ENSG00000225208	lncRNA	AL133387.1	0	0	0	0	0	0
ENSG00000225209	lncRNA	AC092637.1	0	0	0	0	0	0
ENSG00000225213	lncRNA	AC073367.1	0	0	0	0	0	0
ENSG00000225214	lncRNA	AC079790.1	0	0	0	0	0	0
ENSG00000225216	lncRNA	AC007362.1	0	0	0	0	0	0
ENSG00000225218	lncRNA	AP001628.1	0	0	0	0	0	0
ENSG00000225226	lncRNA	LINC01795	0	0	0	0	0	0
ENSG00000225230	lncRNA	AC008937.1	0	0	0	0	0	0
ENSG00000225231	lncRNA	LINC02470	0	0	0	0	0	0
ENSG00000225233	lncRNA	AL592402.1	0	0	0	0	0	0
ENSG00000225234	lncRNA	TRAPPC12-AS1	0	0	0	0.399821	0.385465	0.541581
ENSG00000225235	lncRNA	INTS6L-AS1	0	0	0	0	0	0
ENSG00000225243	lncRNA	AL021026.1	0	0	0	0.228039	0	0
ENSG00000225249	lncRNA	LINC00378	0	0	0	0	0	0
ENSG00000225255	lncRNA	PSLNR	0	0	0	0	0	0
ENSG00000225258	lncRNA	AC009478.1	0	0	0	0	0	0
ENSG00000225263	lncRNA	PCDH9-AS3	0	0	0	0	0	0
ENSG00000225265	lncRNA	TAF1A-AS1	0.673084	0.559075	1.42295	0.481695	1.0062	0.788418
ENSG00000225269	lncRNA	LINC00705	1.27019	1.18692	0.935047	1.30671	0.712055	1.11588
ENSG00000225279	lncRNA	AL121987.1	0.6014	0.249767	0.136222	0.430395	0.622411	0.327934
ENSG00000225280	lncRNA	AL158013.1	0	0	0	0	0	0
ENSG00000225284	lncRNA	AC018693.1	0	0	0	0	0	0
ENSG00000225285	lncRNA	LINC01770	0	0.495131	0.540084	0	0	0.144464
ENSG00000225292	lncRNA	AL158212.1	0	0	0	0	0	0
ENSG00000225298	lncRNA	LINC00113	2.49074	4.13771	4.51337	1.48542	2.29134	1.50907
ENSG00000225299	lncRNA	AL139240.1	0	0	0	0	0	0
ENSG00000225300	lncRNA	AL591623.1	0	0	0	0.0926117	0.0892863	0.031362
ENSG00000225303	lncRNA	AL117341.1	0	0	0	0	0	0
ENSG00000225311	lncRNA	AL024474.2	0	0	0	0	0	0
ENSG00000225313	lncRNA	AL513327.1	0.252693	1.04946	1.0875	0.587732	1.39478	1.14825
ENSG00000225315	lncRNA	AL591178.1	0	0	0	0	0	0
ENSG00000225316	lncRNA	LINC00350	0	0	0	0	0	0
ENSG00000225321	lncRNA	LINC01427	0	0	0	0	0	0
ENSG00000225325	lncRNA	AL583804.1	0	0	0	0	0	0
ENSG00000225328	lncRNA	LINC01594	0	0	0	0	0	0
ENSG00000225329	lncRNA	LHFPL3-AS2	0	0	0	0	0.0736847	0
ENSG00000225330	lncRNA	AF064860.1	0	0	0	0	0	0
ENSG00000225331	lncRNA	LINC01678	0	0	0	0	0	0
ENSG00000225334	lncRNA	LINC02813	0	0	0	0	0	0
ENSG00000225335	lncRNA	AC016027.1	1.13486	2.26232	3.70157	1.70555	1.0179	1.59518
ENSG00000225337	lncRNA	AL353608.1	0	0	0	0	0	0
ENSG00000225339	lncRNA	AL354740.1	8.16634	4.87379	4.686	2.31607	1.73206	1.86915
ENSG00000225341	lncRNA	AC013269.1	0	0	0	0	0	0
ENSG00000225342	lncRNA	LRRK2-DT	0.222492	0	0	0	0	0
ENSG00000225350	lncRNA	FREM2-AS1	0	0	0	0	0	0
ENSG00000225359	lncRNA	AL358393.1	0	0	0	0	0	0
ENSG00000225361	lncRNA	PPP1R26-AS1	0.242486	0.402826	0.2197	0.390457	0.460089	0.558279
ENSG00000225365	lncRNA	AC078942.1	0	0	0	0	0	0
ENSG00000225376	lncRNA	TMEM246-AS1	0	0	0	0	0	0
ENSG00000225377	lncRNA	NRSN2-AS1	0.242602	0.403019	0.586146	1.07065	0.753233	0.646737
ENSG00000225378	lncRNA	AC015977.2	0	0	0	0	0	0
ENSG00000225383	lncRNA	SFTA1P	18.3335	10.5935	15.383	9.98297	11.4944	14.5657
ENSG00000225386	lncRNA	AC099754.1	0	0	0	0	0	0
ENSG00000225387	lncRNA	AL591896.1	0	0	0	0	0	0
ENSG00000225391	lncRNA	AL135902.1	0	0	0	0	0	0
ENSG00000225393	lncRNA	BX571846.1	0	0	0.415562	0.328244	0.316458	0.778094
ENSG00000225399	lncRNA	AC121247.2	0	0	0	0	0	0
ENSG00000225407	lncRNA	AC025188.1	0	0	0	0	0	0.512245
ENSG00000225408	lncRNA	AL136980.1	0	0	0	0	0	0
ENSG00000225411	lncRNA	CR786580.1	0	0	0.0711914	0	0.325281	0.0380852
ENSG00000225413	lncRNA	LINC02557	0	0	0	0	0	0
ENSG00000225417	lncRNA	AL049648.1	0	0	0	0	0	0
ENSG00000225420	lncRNA	AC104134.1	0	0	0	0	0	0
ENSG00000225421	lncRNA	AC019330.1	0	0	0	0	0	0
ENSG00000225424	lncRNA	AL391869.1	0	0	0	0	0	0
ENSG00000225427	lncRNA	LINC00331	0	0	0	0	0	0
ENSG00000225431	lncRNA	LINC01671	0	0.237384	0.129468	0	0	0.0692613
ENSG00000225434	lncRNA	LINC01504	0.701796	0.485769	1.00676	0.334828	0.403507	0.722836
ENSG00000225437	lncRNA	PACRG-AS2	0	0	0	0	0	0
ENSG00000225439	lncRNA	BOLA3-AS1	1.90554	1.69583	1.66481	0.974075	0.751279	0.742185
ENSG00000225442	lncRNA	MPRIP-AS1	0	0	0	0.343136	0.165407	0
ENSG00000225444	lncRNA	LINC01867	0	0	0	0	0	0
ENSG00000225446	lncRNA	LINC01763	0	0	0	0	0	0
ENSG00000225450	lncRNA	AL021707.1	1.01456	0	0	0	0	0.122939
ENSG00000225457	lncRNA	AC073346.1	0	0	0	0	0	0.170118
ENSG00000225458	lncRNA	AL049812.2	0	0	0	0	0	0
ENSG00000225465	lncRNA	RFPL1S	0	0	0	0.048302	0.0232838	0.0817848
ENSG00000225470	lncRNA	JPX	2.62789	2.75396	3.01512	2.10036	1.92328	2.09809
ENSG00000225472	lncRNA	AL136366.1	0	0	0	0	0	0
ENSG00000225473	lncRNA	ATP13A4-AS1	0	0	0	0	0	0
ENSG00000225479	lncRNA	PLCB1-IT1	0	0	0	0	0	0
ENSG00000225484	lncRNA	NUTM2B-AS1	1.87214	2.49179	3.05522	2.25184	2.37329	2.05536
ENSG00000225488	lncRNA	AC092447.4	0	0	0	0	0	0
ENSG00000225489	lncRNA	AL354707.1	0	0.132627	0	0	0.165251	0
ENSG00000225493	lncRNA	LINC01107	0	0	0	0	0	0
ENSG00000225497	lncRNA	KCNMA1-AS2	0	0	0	0	0	0
ENSG00000225498	lncRNA	AC002064.2	0	0	0	0	0.477493	0
ENSG00000225506	lncRNA	CYP4A22-AS1	0	0.457499	0.748553	0.788356	1.14007	0.667421
ENSG00000225518	lncRNA	LINC01703	0.314495	0	0.427413	0.112535	0.216988	0.0762175
ENSG00000225519	lncRNA	AL365434.1	0	0	0	0	0	0
ENSG00000225521	lncRNA	AC005237.1	0	0	0	0.324721	0	0
ENSG00000225527	lncRNA	AL450384.1	0	0	0	0	0	0
ENSG00000225532	lncRNA	AL731684.1	0	0	0	0	0	0
ENSG00000225535	lncRNA	LINC01393	0	0	0.199831	0	0	0.0267258
ENSG00000225537	lncRNA	AC073325.1	0	0	0	0	0	0
ENSG00000225539	lncRNA	LINC01821	0	0	0	0	0	0
ENSG00000225542	lncRNA	ZNF385D-AS1	0	0	0	0	0	0
ENSG00000225545	lncRNA	AL162399.1	0	0	0	0	0	0
ENSG00000225546	lncRNA	LINC02476	0	0	0	0	0	0
ENSG00000225548	lncRNA	LINC01980	0.106976	0	0.0484618	0.0765579	0	0
ENSG00000225552	lncRNA	NAALADL2-AS1	0	0	0	0	0	0
ENSG00000225555	lncRNA	AP000320.1	0	0	0	0	0.0662131	0
ENSG00000225559	lncRNA	AC083867.2	0	0	0	0	0	0
ENSG00000225561	lncRNA	LINC01710	0	0	0	0	0	0
ENSG00000225563	lncRNA	AC006076.1	0	0	0	0	0	0
ENSG00000225564	lncRNA	LINC01492	0	0.0953079	0	0	0	0
ENSG00000225570	lncRNA	AC013733.1	0	0	0	0	0	0
ENSG00000225572	lncRNA	DOCK4-AS1	0	0	0	0.0727822	0	0
ENSG00000225578	lncRNA	NCBP2-AS1	0	0	0.817814	0	0	0.218752
ENSG00000225579	lncRNA	EDNRB-AS1	0	0	0	0	0	0
ENSG00000225582	lncRNA	AC011193.1	0	0	0	0	0	0
ENSG00000225588	lncRNA	AC096669.1	0	0	0	0	0	0
ENSG00000225595	lncRNA	LINC01623	0	0	0	0	0	0
ENSG00000225598	lncRNA	AL606519.1	0	0	0	0	0	0
ENSG00000225602	lncRNA	MTOR-AS1	0.664851	0	0	0.237902	0	0
ENSG00000225605	lncRNA	AC092813.1	0	0	0	0	0	0
ENSG00000225606	lncRNA	AC005281.1	0	0	0	0	0	0
ENSG00000225610	lncRNA	AC007679.2	0	0	0	0	0	0
ENSG00000225611	lncRNA	LINC02158	0	0	0	0	0	0
ENSG00000225612	lncRNA	AC099552.2	0	0	0	0	0	0
ENSG00000225613	lncRNA	LINCMD1	0	0	0	0	0	0
ENSG00000225619	lncRNA	MYT1L-AS1	0	0	0	0	0	0
ENSG00000225620	lncRNA	AC104463.1	0	0	0	0	0	0
ENSG00000225623	lncRNA	AGBL4-IT1	0	0	0	0	0	0
ENSG00000225626	lncRNA	C9orf135-DT	0	0	0	0	0	0.029341
ENSG00000225632	lncRNA	AL161644.1	0	0	0	0	0	0
ENSG00000225637	lncRNA	AP001046.1	0	0	0	0	0	0
ENSG00000225640	lncRNA	LINC01729	0	0	0	0	0	0
ENSG00000225643	lncRNA	AL606491.1	0	0	0.475788	0.375816	0	0.63633
ENSG00000225647	lncRNA	AC005487.1	0	0	0	0	0	0
ENSG00000225649	lncRNA	AC064875.1	0	0	0	0	0	0.0309982
ENSG00000225652	lncRNA	KCNMA1-AS3	0	0	0	0	0	0
ENSG00000225655	lncRNA	BX255923.1	0	0.618732	0.337453	0	0.513953	0.361054
ENSG00000225656	lncRNA	AL118511.2	0	0	0	0	0	0
ENSG00000225657	lncRNA	LINC01716	0	0	0	0	0	0
ENSG00000225670	lncRNA	CADM3-AS1	0	0	0	0	0	0
ENSG00000225675	lncRNA	LINC01771	0	0	0.405301	0	0	0
ENSG00000225676	lncRNA	AC002378.1	0.229539	0	0.103985	0	0	0
ENSG00000225680	lncRNA	AL163953.1	0	0	0	0	0	0
ENSG00000225683	lncRNA	PACRG-AS3	0	0	0	0	0	0
ENSG00000225684	lncRNA	FAM225B	0	0	0.0290636	0	0	0.0310962
ENSG00000225689	lncRNA	AL008633.1	0	0	0	0	0	0
ENSG00000225703	lncRNA	AC114737.2	0	0	0	0	0	0
ENSG00000225706	lncRNA	PTPRD-AS1	0.202346	0.252108	0.458328	0.181012	0.069805	0.122596
ENSG00000225708	lncRNA	AL354984.2	0	0	0	0	0	0
ENSG00000225718	lncRNA	AC092100.1	0	0	0	0	0	0
ENSG00000225721	lncRNA	AL592166.1	0.663113	3.30476	2.4032	1.42368	0.686279	0.241057
ENSG00000225725	lncRNA	FAM66E	0	0.148313	0	0	0	0
ENSG00000225730	lncRNA	ADGRF5-AS1	0	0	0	0	0	0
ENSG00000225731	lncRNA	PDE9A-AS1	0	0	0	0	0	0
ENSG00000225733	lncRNA	FGD5-AS1	51.0033	47.425	49.0151	25.8107	27.1553	27.9006
ENSG00000225738	lncRNA	NRG3-AS1	0	0	0	0	0	0
ENSG00000225742	lncRNA	LINC02036	0	0.601594	0.196864	0.103666	0.399774	0.26329
ENSG00000225744	lncRNA	AC017002.1	0	0	0	0	0	0
ENSG00000225746	lncRNA	MEG8	0.165983	0.168506	0.17545	0.0395955	0.0636229	0.0603387
ENSG00000225750	lncRNA	AL357500.1	0	0	0	0	0	0
ENSG00000225751	lncRNA	AC087501.1	0	0	0	0	0	0
ENSG00000225752	lncRNA	AL023581.1	0	0	0	0	0	0
ENSG00000225756	lncRNA	DBH-AS1	0	0	0	0	0	0
ENSG00000225759	lncRNA	LINC00489	0	0	0	0	0	0
ENSG00000225761	lncRNA	AL596247.1	0	0	0	0	0	0
ENSG00000225762	lncRNA	LINC01389	0	0	0	0	0	0
ENSG00000225764	lncRNA	P3H2-AS1	0	0	0	0	0	0
ENSG00000225765	lncRNA	LINC01831	0	0	0	0	0	0
ENSG00000225767	lncRNA	FAF1-AS1	0	0	0	0	0	0
ENSG00000225768	lncRNA	LINC02620	0	0	0	0	0	0
ENSG00000225775	lncRNA	AL137220.1	0	0	0	0	0	0
ENSG00000225778	lncRNA	PROSER2-AS1	0.154942	0.257395	0.210573	0.0554425	0.481066	0.0751001
ENSG00000225783	lncRNA	MIAT	0	0	0.0330466	0.065257	0.0377483	0.0176789
ENSG00000225785	lncRNA	AL109610.1	0	0	0	0	0	0
ENSG00000225790	lncRNA	AC007953.1	0	0	0.0695959	0.21989	0.317991	0.0558475
ENSG00000225791	lncRNA	TRAM2-AS1	0.707587	0.832623	1.14863	0.42199	0.54923	0.450142
ENSG00000225792	lncRNA	AC004540.2	0	0	0	0	0	0
ENSG00000225793	lncRNA	AL080250.1	0.483023	0.222893	0.145878	0.192043	0.185147	0.11706
ENSG00000225794	lncRNA	AC073321.1	0	0	0	0	0	0.0649097
ENSG00000225798	lncRNA	AC025918.1	0	0	0	0	0	0
ENSG00000225806	lncRNA	AL121917.1	0.492745	0.409283	0.223221	0.440794	0.169986	0.417956
ENSG00000225807	lncRNA	AC069281.1	0	0	0	0	0	0
ENSG00000225811	lncRNA	AL354771.1	0	0	0	0	0	0
ENSG00000225815	lncRNA	AC092669.1	0	0	0	0	0	0
ENSG00000225818	lncRNA	AC118653.1	0	0	0	0	0	0
ENSG00000225819	lncRNA	AC013269.2	0	0	0	0	0	0
ENSG00000225822	lncRNA	UBXN7-AS1	0	0	0	0.470256	0	0
ENSG00000225826	lncRNA	LINC00626	0	0	0	0	0	0
ENSG00000225833	lncRNA	AC097625.1	0	0.73407	0	0.63247	0	0
ENSG00000225836	lncRNA	AL157400.1	0	0	0	0	0	0
ENSG00000225839	lncRNA	TRMT2B-AS1	0	0	0	0	0	0
ENSG00000225850	lncRNA	AL355490.2	0	0	0	0	0	0
ENSG00000225855	lncRNA	RUSC1-AS1	7.64673	7.90942	7.1896	6.45332	7.56546	7.9197
ENSG00000225857	lncRNA	LINC02816	0	0	0	0	0	0.0821784
ENSG00000225867	lncRNA	AL022315.1	0	0	0	0	0.351408	0.370298
ENSG00000225870	lncRNA	LINC00368	0	0	0	0	0	0
ENSG00000225877	lncRNA	PSG8-AS1	0	0	0	0	0.186867	0
ENSG00000225879	lncRNA	AL513210.1	0	0	0	0	0	0
ENSG00000225880	lncRNA	LINC00115	0.770359	0	0.174492	1.65393	1.06303	1.40022
ENSG00000225881	lncRNA	AC009365.3	0	0	0	0	0	0
ENSG00000225882	lncRNA	LINC01456	0	0	0	0	0	0
ENSG00000225884	lncRNA	AC098872.1	0	0	0	0	0	0
ENSG00000225885	lncRNA	AC023590.1	0	0.141966	0	0	0	0
ENSG00000225886	lncRNA	AL445490.1	0	0	0	0	0.317991	0.111695
ENSG00000225889	lncRNA	AC012368.1	0.224593	0.186551	0.237403	0.294674	0.258266	0.535227
ENSG00000225891	lncRNA	DHDDS-AS1	0	0	0	0	0.13878	0.0974932
ENSG00000225903	lncRNA	AL035404.2	0	0	0	0	0	0
ENSG00000225905	lncRNA	AL391244.1	0	0	0	0.334289	0.322286	0
ENSG00000225913	lncRNA	AL138767.3	0	0	0	0	0	0
ENSG00000225914	lncRNA	TSBP1-AS1	0.0561276	0.0466205	0.127133	0.0401679	0	0.006801
ENSG00000225916	lncRNA	AC007879.2	1.84131	0.764712	0	0.658871	0	0.557799
ENSG00000225919	lncRNA	LINC01745	0	0	0	0	0	0
ENSG00000225924	lncRNA	TAB2-AS1	0	0	0	0	0	0
ENSG00000225929	lncRNA	AC000036.1	0	0	0	0	0	0
ENSG00000225930	lncRNA	LINC02249	0	0	0	0	0	0
ENSG00000225936	lncRNA	AL731557.1	0	0	0	0	0	0
ENSG00000225937	lncRNA	PCA3	0	0	0	0	0.0123449	0
ENSG00000225938	lncRNA	AL109741.1	0	1.04555	0	0	0	0
ENSG00000225940	lncRNA	C5orf67	0	0	0	0	0	0
ENSG00000225942	lncRNA	LINC01875	0	0	0	0	0	0
ENSG00000225945	lncRNA	AL121574.1	0	0	0	0	0	0
ENSG00000225948	lncRNA	LINC02648	0	0	0	0	0	0
ENSG00000225951	lncRNA	ODF2-AS1	0	0	0	0	0	0
ENSG00000225952	lncRNA	AL512444.1	0	0	0	0	0	0
ENSG00000225953	lncRNA	SATB2-AS1	0.169094	0.35113	0.612815	0.393291	0.291668	0.286857
ENSG00000225956	lncRNA	AL050320.1	0	0	0	0	0	0
ENSG00000225960	lncRNA	AL441989.1	0	0	0	0	0	0
ENSG00000225963	lncRNA	AC009950.1	0.374654	0.311194	0.46674	0.368668	0.323119	0.556131
ENSG00000225964	lncRNA	NRIR	0.184533	0	0	0	0	0
ENSG00000225970	lncRNA	AL500522.1	0	0	0	0	0	0
ENSG00000225974	lncRNA	AC005550.1	0	0	0	0	0	0
ENSG00000225975	lncRNA	LINC01534	0.492865	0.716418	0.502369	0.705441	0.170028	0.47778
ENSG00000225978	lncRNA	HAR1A	0.539087	0.223888	0.244214	0.09645	0	0.0326618
ENSG00000225979	lncRNA	AC010746.2	0	0	0	0	0	0
ENSG00000225981	lncRNA	AC102953.1	0	0	0	0.364496	0	0
ENSG00000225982	lncRNA	AL355482.2	0.44304	0.735994	0	0.317064	0.305679	0
ENSG00000225986	lncRNA	UBXN10-AS1	0	0	0	0	0	0
ENSG00000225988	lncRNA	LAMP5-AS1	0	0	0	0	0	0
ENSG00000226004	lncRNA	LINC02528	0	0	0	0	0	0
ENSG00000226005	lncRNA	LINC02660	0.532858	0.221301	0	0.762684	0.643386	1.09767
ENSG00000226007	lncRNA	BX005266.2	0.442654	0.919189	0	0	0.229059	0.187734
ENSG00000226009	lncRNA	KCNIP2-AS1	0.822174	0	0	0.147098	0.425448	0.199253
ENSG00000226012	lncRNA	AP001434.1	0	0	0	0	0	0
ENSG00000226017	lncRNA	PRICKLE2-AS3	0	0	0	0	0	0
ENSG00000226022	lncRNA	AC026167.1	0	0	0	0	0	0
ENSG00000226026	lncRNA	AC092802.2	0	0	0.112816	0.0445554	0.0429556	0
ENSG00000226029	lncRNA	LINC01772	0.468981	0.389544	0.849821	0.950946	0.808942	1.07974
ENSG00000226031	lncRNA	FGF13-AS1	0	0	0	0	0	0
ENSG00000226032	lncRNA	AL035530.1	0	0	0	0	0	0
ENSG00000226037	lncRNA	LINC01040	0	0	0	0	0	0
ENSG00000226041	lncRNA	AC010745.1	0	0	0	0	0	0
ENSG00000226043	lncRNA	AP000561.1	0	0	0	0	0	0
ENSG00000226047	lncRNA	AL807761.3	0	0	0	0	0	0
ENSG00000226051	lncRNA	ZNF503-AS1	0.0961488	0	0.0435568	0	0	0.0582538
ENSG00000226053	lncRNA	LINC01776	0	0	0.103098	0	0	0
ENSG00000226063	lncRNA	AC009531.1	0	0	0	0	0	0
ENSG00000226067	lncRNA	LINC00623	14.6331	20.4196	15.9096	12.7761	9.69237	13.4051
ENSG00000226070	lncRNA	AL139275.1	0	0	0	0	0	0
ENSG00000226078	lncRNA	AL356309.1	0	0	0	0	0	0
ENSG00000226079	lncRNA	AL138830.1	0	0	0	0	0	0
ENSG00000226083	lncRNA	SLC39A12-AS1	0	0	0	0	0	0
ENSG00000226087	lncRNA	AC073283.2	0	0	0	0	0	0
ENSG00000226088	lncRNA	HHLA3-AS1	0	0	0	0	0	0
ENSG00000226089	lncRNA	AL122017.1	0	0	0	0	0	0
ENSG00000226091	lncRNA	LINC00937	0	0	0.0405802	0.0320535	0	0.0108546
ENSG00000226097	lncRNA	AC099342.1	0.237158	0.196988	0	0	0	0
ENSG00000226101	lncRNA	LINC02097	0	0	0	0	0	0.0253587
ENSG00000226115	lncRNA	AP001476.2	0	0	0	0	0	0
ENSG00000226122	lncRNA	DDC-AS1	0	0	0	0	0	0
ENSG00000226125	lncRNA	LINC01907	0.705537	0.146508	0.239714	0.12623	0.182546	0.149613
ENSG00000226130	lncRNA	AC013248.1	0	0	0	0	0	0
ENSG00000226133	lncRNA	LINC02794	0	0	0	0	0	0
ENSG00000226134	lncRNA	AL359502.1	0	0	0	0	0	0
ENSG00000226137	lncRNA	BAIAP2-DT	7.33342	5.82642	4.67026	8.55683	6.89298	6.89004
ENSG00000226140	lncRNA	LINC02654	0	0	0	0	0	0
ENSG00000226143	lncRNA	Z98752.1	0	0	0	0	0	0
ENSG00000226149	lncRNA	AL356124.1	0	0	0	0.026604	0.0512974	0.009009
ENSG00000226159	lncRNA	LINC01375	0	0	0	0	0	0
ENSG00000226163	lncRNA	AL513185.2	0	0	0	0	0	0
ENSG00000226167	lncRNA	AP4B1-AS1	0.877649	0.971987	0.397588	0.418729	0.60554	0.248147
ENSG00000226169	lncRNA	AL121885.1	0	0	0	0	0	0
ENSG00000226172	lncRNA	AL139420.1	0	0	0	0	0	0
ENSG00000226179	lncRNA	LINC00685	3.55571	0	1.07386	2.96877	2.86217	3.73413
ENSG00000226180	lncRNA	AC010536.1	0.582859	0.322755	0.0880145	0.0695208	0.268098	0.258967
ENSG00000226181	lncRNA	AL132671.1	0	0	0	0	0	0
ENSG00000226193	lncRNA	AL049548.1	0	0	0	0	0	0
ENSG00000226194	lncRNA	LINC02519	0	0	0	0	0	0
ENSG00000226197	lncRNA	AL583785.1	0	0	0	0	0	0
ENSG00000226200	lncRNA	SGMS1-AS1	0.211074	0.379864	0.286859	0.113292	0.218448	0.080993
ENSG00000226203	lncRNA	LINC01733	0	0	0	0	0	0
ENSG00000226204	lncRNA	AL157359.1	0	0	0	0	0	0
ENSG00000226206	lncRNA	BX470209.1	0	0	0	0	0	0
ENSG00000226207	lncRNA	AL080316.1	0	0	0	0	0	0
ENSG00000226208	lncRNA	AL513285.1	0	0	0	0	0	0
ENSG00000226218	lncRNA	AC079163.1	0	0	0	0	0	0
ENSG00000226235	lncRNA	LEMD1-AS1	0	0	0	0	0	0
ENSG00000226237	lncRNA	GAS1RR	0	0	0.0462945	0.0365671	0.0705081	0.0742983
ENSG00000226238	lncRNA	AC132807.1	0	0	0	0	0	0
ENSG00000226239	lncRNA	AL031658.1	0	0	0	0	0	0
ENSG00000226240	lncRNA	LINC00381	8.08953	5.59942	5.8024	1.80916	3.25583	3.06326
ENSG00000226245	lncRNA	ZNF32-AS1	0	0	0	0	1.20969	0.141635
ENSG00000226249	lncRNA	AL365271.1	0	0	0	0	0	0
ENSG00000226250	lncRNA	LINC00408	0	0	0	0	0	0
ENSG00000226251	lncRNA	LINC02608	0.426645	0	0	0	0	0
ENSG00000226252	lncRNA	AL135960.1	0	0	0	0	0	0
ENSG00000226258	lncRNA	GRM7-AS3	0	0	0	0	0	0
ENSG00000226263	lncRNA	ISM1-AS1	0	0	0	0	0	0
ENSG00000226266	lncRNA	AC009961.1	0	0.154683	0.168727	0.399821	0.128488	0.541581
ENSG00000226272	lncRNA	ARHGAP26-AS1	0	0	0	0	0	0
ENSG00000226276	lncRNA	AC093382.1	0	0	0	0	0	0.486566
ENSG00000226277	lncRNA	AC105393.1	0	0	0	0	0	0
ENSG00000226281	lncRNA	AL031123.1	0.497985	0.551514	0.526388	0.0593975	0.0572648	0.100572
ENSG00000226286	lncRNA	AL008733.1	0	0	0	0	0	0
ENSG00000226291	lncRNA	AC091729.2	0	0	0	0	0	0
ENSG00000226296	lncRNA	AC036101.1	0	0	0	0	0	0
ENSG00000226302	lncRNA	AC122683.1	0	0	0	0	0	0
ENSG00000226304	lncRNA	AL358612.1	0	0	0	0	0	0
ENSG00000226308	lncRNA	AL122058.1	0	0	0	0	0	0
ENSG00000226310	lncRNA	AL022157.1	0.762829	0	0	0.545921	0	0.0924353
ENSG00000226312	lncRNA	CFLAR-AS1	0	0.194442	0.424192	0.753886	0.161515	0.439675
ENSG00000226317	lncRNA	LINC00351	0	0	0	0	0	0
ENSG00000226320	lncRNA	LINC01811	0	0	0	0	0	0
ENSG00000226323	lncRNA	AC006150.1	0	0	0	0	0	0
ENSG00000226328	lncRNA	NUP50-DT	8.23666	8.18298	9.43806	3.92973	4.01149	3.67916
ENSG00000226330	lncRNA	AL606489.1	0	0	0	0	0.360085	0
ENSG00000226332	lncRNA	AL354836.1	13.4083	11.1372	9.4487	7.99643	7.19535	9.11661
ENSG00000226334	lncRNA	AL359182.1	0	0	2.44995	1.1611	1.49255	1.17958
ENSG00000226337	lncRNA	TMEM252-DT	0	0	0	0	0	0
ENSG00000226349	lncRNA	AC099066.1	0	0	0	0	0	0
ENSG00000226352	lncRNA	PSPC1-AS2	0	1.12063	0	0	0	0
ENSG00000226355	lncRNA	AL353803.1	0	0	0	0	0.0758237	0.0266332
ENSG00000226362	lncRNA	FAM41AY2	0	0	0	0	0	0
ENSG00000226363	lncRNA	HAGLROS	0	0.375875	0.205001	0	0	0
ENSG00000226364	lncRNA	LINC02089	0	0	0	0	0	0
ENSG00000226367	lncRNA	ST7-AS2	0	0	0	0	0	0
ENSG00000226370	lncRNA	LINC00375	0	0	0	0	0	0
ENSG00000226374	lncRNA	LINC01345	0	0	0	0	0	0
ENSG00000226375	lncRNA	AL022310.1	0	0	0	0	0	0
ENSG00000226376	lncRNA	AL135923.1	0	0	0	0	0	0
ENSG00000226377	lncRNA	AC084809.1	0.167752	0.278675	0.151988	1.02044	0.115741	0.569162
ENSG00000226380	lncRNA	AC016831.1	0.689761	1.01854	0.937416	0.219391	0.370149	0.241457
ENSG00000226383	lncRNA	LINC01876	0.37355	0	0.0846118	1.26983	1.09537	0.837397
ENSG00000226386	lncRNA	PARD3-AS1	0	1.39522	1.52189	0	0	0
ENSG00000226387	lncRNA	SORCS3-AS1	0	0	0	0	0	0
ENSG00000226390	lncRNA	KCNQ2-AS1	0	0	0	0	0	0
ENSG00000226397	lncRNA	C12orf77	0	0	0	0	0	0
ENSG00000226398	lncRNA	AC013480.1	0	0	0	0	0	0
ENSG00000226403	lncRNA	AL392089.1	0.949965	1.18359	0.860696	0.509885	0.491576	0.287778
ENSG00000226409	lncRNA	AL450332.1	0	0	0	0	0	0
ENSG00000226412	lncRNA	LINC02628	0	0	0	0	0	0
ENSG00000226416	lncRNA	MRPL23-AS1	0	0	0.122498	0	0	0
ENSG00000226419	lncRNA	SLC16A1-AS1	0.840333	1.03037	1.14205	1.21709	1.00774	1.43042
ENSG00000226423	lncRNA	AC093642.1	0	0	0	0	0	0
ENSG00000226425	lncRNA	AL358613.1	0	0	0	0	0	0
ENSG00000226426	lncRNA	AC012558.1	0	0	0	0	0	0
ENSG00000226431	lncRNA	AL121929.2	0	0	0	0	0	0
ENSG00000226433	lncRNA	AP000290.1	0	0	0	0	0	0
ENSG00000226438	lncRNA	AL442071.1	0	0	0	0	0	0
ENSG00000226440	lncRNA	LAMA4-AS1	0	0	0	0	0	0
ENSG00000226441	lncRNA	PLCL2-AS1	0	0	0	0	0	0
ENSG00000226442	lncRNA	AC006037.1	0	0	0	0	0	0
ENSG00000226445	lncRNA	BX322234.1	0.175926	1.02289	1.51424	0.251804	0.151726	0.063953
ENSG00000226447	lncRNA	ZNF25-DT	0	0	0	0	0	0
ENSG00000226453	lncRNA	LINC02542	0.878257	0.437697	0.397863	0.377117	0.363576	0.595964
ENSG00000226454	lncRNA	AL033380.1	0	0	0	0	0	0
ENSG00000226455	lncRNA	AL121787.1	0	0	0	0	0.187167	0
ENSG00000226465	lncRNA	AL390198.1	0	0.214104	0.350314	0.368941	0.444617	0.343579
ENSG00000226471	lncRNA	Z93930.2	0.345089	0.573274	0.625322	0.617411	0.238097	0.710871
ENSG00000226476	lncRNA	LINC01748	0	0	0.02966	0	0	0
ENSG00000226482	lncRNA	ADIPOQ-AS1	0	0	0	0	0	0.124974
ENSG00000226484	lncRNA	AL606516.1	0	0	0	0	0	0
ENSG00000226486	lncRNA	LINC01035	0	0	0	0	0	0
ENSG00000226487	lncRNA	AL139254.1	0	0	0	0	0	0
ENSG00000226488	lncRNA	LINC01824	0	0	0	0	0	0
ENSG00000226496	lncRNA	LINC00323	0	0	0	0	0.0680938	0
ENSG00000226497	lncRNA	LINC02549	0	0	0	0	0	0
ENSG00000226506	lncRNA	AC007463.1	0	0	0	0	0	0
ENSG00000226508	lncRNA	LINC01918	0	0.417598	0	0	0	0.243685
ENSG00000226510	lncRNA	UPK1A-AS1	0.63809	0	0	0.228326	0	0
ENSG00000226516	lncRNA	FAM138B	0	0	0	0	0	0
ENSG00000226519	lncRNA	LINC00390	0.175015	0.0726852	0	0	0	0
ENSG00000226520	lncRNA	KIRREL1-IT1	0	0.717813	0.391492	0	0.894384	0
ENSG00000226522	lncRNA	HDAC9-AS1	0	0	0	0	0	0
ENSG00000226526	lncRNA	AL049569.1	0	0	0.72266	0	0	0
ENSG00000226527	lncRNA	AP000289.1	0	0	0	0	0	0
ENSG00000226530	lncRNA	AL158055.1	0	0	0	0	0	0
ENSG00000226533	lncRNA	BTBD9-AS1	0	0	0	0	0	0
ENSG00000226542	lncRNA	AC114814.1	0	0	0	0	0	0
ENSG00000226548	lncRNA	AC016722.1	0	0	0	0	0	0
ENSG00000226562	lncRNA	CYP4F26P	2.1116	1.65076	2.86976	2.71123	3.12808	3.35644
ENSG00000226566	lncRNA	AL390962.1	0	0	0	0	0	0
ENSG00000226567	lncRNA	LINC00606	0	0	0	0	0	0
ENSG00000226571	lncRNA	AL592429.2	0	0	0	0.0374189	0.0721505	0
ENSG00000226576	lncRNA	AC060234.1	0	0	0	0	0	0
ENSG00000226578	lncRNA	AL132657.1	0	0	0	0	0	0.0863335
ENSG00000226581	lncRNA	LINC02848	0	0	0	0	0.0691021	0.0121361
ENSG00000226587	lncRNA	AC006455.1	0	0	0	0	0	0
ENSG00000226594	lncRNA	AL356421.2	0	0	0	0	0	0
ENSG00000226599	lncRNA	AL450344.2	0	0	0	0	0	0
ENSG00000226601	lncRNA	AL359979.1	0	0	0	0	0	0
ENSG00000226604	lncRNA	PAPPA-AS2	0	0	0	0	0	0
ENSG00000226605	lncRNA	AC092567.1	0	0	0	0	0	0
ENSG00000226609	lncRNA	AL390067.1	0	0	0	0	0	0
ENSG00000226619	lncRNA	AL137001.1	0	0	0	0	0	0
ENSG00000226620	lncRNA	LINC00343	0	0.0529442	0	0	0	0
ENSG00000226622	lncRNA	AC092155.1	0	0	0	0.0238652	0.115041	0.008082
ENSG00000226627	lncRNA	SHANK2-AS1	0	0	0	0	0	0.061408
ENSG00000226629	lncRNA	LINC00974	0	0	0	0	0.081738	0
ENSG00000226640	lncRNA	AL357793.1	0	0	0	0	0	0
ENSG00000226643	lncRNA	AL513314.1	0	0	0	0	0	0
ENSG00000226644	lncRNA	AL121899.1	0	0.771715	0	0.332452	0	0
ENSG00000226645	lncRNA	AP006216.1	0	0	0	0	0	0
ENSG00000226647	lncRNA	AL365356.1	0	0	0	0	0	0
ENSG00000226648	lncRNA	PLCG1-AS1	0.241534	0.0501555	0.164127	0.280889	0.20831	0.117071
ENSG00000226649	lncRNA	AC019118.1	0	0	0	0	0	0
ENSG00000226655	lncRNA	AC096732.1	0	0	0	0	0	0
ENSG00000226659	lncRNA	AC021028.1	0.848296	0	0.384291	0	0.292644	0.411167
ENSG00000226661	lncRNA	AC004973.1	0	0	0	0	0	0
ENSG00000226664	lncRNA	AL020998.1	0	0	0	0	0	0
ENSG00000226669	lncRNA	AL354977.1	0	0	0	0	0	0
ENSG00000226673	lncRNA	LINC01108	0	0	0	0	0	0.0498805
ENSG00000226674	lncRNA	TEX41	0	0	0	0	0	0
ENSG00000226676	lncRNA	LINC02679	0	0	0	0	0	0
ENSG00000226679	lncRNA	AL606748.1	0	0	0.350849	0	0.267177	0.0938465
ENSG00000226680	lncRNA	AC073311.1	0	0	0	0	0	0
ENSG00000226681	lncRNA	AC020595.1	0	0	0	0	0	0
ENSG00000226686	lncRNA	LINC01535	0.115791	0.192356	0.262275	0.290032	0.239673	0.378835
ENSG00000226688	lncRNA	ENTPD1-AS1	1.03448	1.55003	1.25888	0.689524	0.776725	0.845515
ENSG00000226694	lncRNA	AL441943.1	0	0	0	0	0	0
ENSG00000226696	lncRNA	LENG8-AS1	1.22089	1.01409	0.414812	0.982954	1.89532	2.36705
ENSG00000226698	lncRNA	AL034380.1	0	0	0	0	0	0
ENSG00000226699	lncRNA	AL360181.1	0	0	0	0	0	0
ENSG00000226702	lncRNA	MIR217HG	0	0	0	0	0	0
ENSG00000226706	lncRNA	AL161452.1	0.454146	1.13166	0.205735	0.325011	0.470012	0.0550308
ENSG00000226707	lncRNA	AL359458.1	0	0	0	0	0	0
ENSG00000226708	lncRNA	AC073409.1	0	1.56638	0	0	0	0
ENSG00000226709	lncRNA	FGF12-AS3	0	0	0	0	0	0
ENSG00000226711	lncRNA	FAM66C	0.107566	0.178692	0.146187	0.23094	0.148432	0.156411
ENSG00000226715	lncRNA	LINC01709	0	1.03057	1.12414	0.380543	0.672611	0.859112
ENSG00000226716	lncRNA	AL589986.1	0	0	0	0	0	0
ENSG00000226717	lncRNA	PTPRD-AS2	0	0	0	0	0	0
ENSG00000226722	lncRNA	LINC00424	0	0	0	0	0	0
ENSG00000226725	lncRNA	PABPC1L2B-AS1	0	0	0	0	0	0
ENSG00000226733	lncRNA	AL138826.1	0	0	0	0	0	0
ENSG00000226739	lncRNA	AL358972.1	0	0	0	0	0	0
ENSG00000226741	lncRNA	LINC02554	0	0	0	0	0	0
ENSG00000226746	lncRNA	SMCR5	0	0	0	0	0	0.0432275
ENSG00000226747	lncRNA	FSIP2-AS2	0	0	0	0	0	0
ENSG00000226754	lncRNA	AL606760.1	0.784051	1.30249	0.118396	0.374073	1.17208	0.886731
ENSG00000226756	lncRNA	AC007365.1	0	0	0	0	0	0.39215
ENSG00000226757	lncRNA	AC079341.1	0	0	0	0	0	0
ENSG00000226758	lncRNA	DISC1-IT1	0	0	0	0	0	0
ENSG00000226759	lncRNA	DAB1-AS1	0	0	0	0	0	0
ENSG00000226762	lncRNA	LINC02668	0	0	0	0.0261141	0	0
ENSG00000226764	lncRNA	AC010145.1	0	0	0	0	0	0
ENSG00000226770	lncRNA	AC000124.1	0	0	0	0	0	0
ENSG00000226771	lncRNA	AP001136.1	0	0	0	0	0	0
ENSG00000226772	lncRNA	AL021393.1	0	0.781737	0	0.33677	0	0
ENSG00000226777	lncRNA	FAM30A	0	0	0	0	0	0.006219
ENSG00000226779	lncRNA	NAALADL2-AS2	0.97742	0.405931	0	0.874368	0.505784	0.710629
ENSG00000226780	lncRNA	AC244035.1	0	0	0	0	0	0
ENSG00000226782	lncRNA	AC117465.1	0	0	0	0	0	0
ENSG00000226791	lncRNA	LINC02611	0	0	0.0409125	0	0	0
ENSG00000226797	lncRNA	AC005828.1	0	0	0	0	0.235851	0
ENSG00000226798	lncRNA	AL138749.1	0	0	0	0	0	0
ENSG00000226800	lncRNA	CACTIN-AS1	0.795527	0.881038	0.360385	0.094887	0	0.160662
ENSG00000226803	lncRNA	ZNF451-AS1	0.103148	0.171353	0.093455	0.0738182	0	0.0624944
ENSG00000226806	lncRNA	LCT-AS1	0.272439	0	0	0	0	0
ENSG00000226808	lncRNA	LINC00840	0	0	0	0	0	0
ENSG00000226812	lncRNA	AL117382.2	0	0	0	0	0	0
ENSG00000226813	lncRNA	LINC01941	0	0	0	0	0	0
ENSG00000226816	lncRNA	AC005082.1	0	0	0.101729	0	0	0.0272109
ENSG00000226819	lncRNA	MEIS1-AS3	0	0	0.325044	0	0	0
ENSG00000226822	lncRNA	LINC02785	0	0	0	0	0	0
ENSG00000226824	lncRNA	AC006001.2	0.568276	0	0.34325	0.745597	0.196043	0.367256
ENSG00000226825	lncRNA	LINC01509	0	0	0	0	0.156671	0.110062
ENSG00000226828	lncRNA	LINC02774	0	0	0	0	0	0
ENSG00000226829	lncRNA	AC093655.1	0	0	0	0	0	0
ENSG00000226833	lncRNA	AC092164.1	0.0799372	0.199191	0.108638	0.0572073	0.137883	0.0484316
ENSG00000226835	lncRNA	ARHGAP29-AS1	0	0	0	0.0481994	0	0.0163222
ENSG00000226842	lncRNA	AL158834.1	0	0	0	0	0	0
ENSG00000226846	lncRNA	LINC00348	0	0	0	0	0	0
ENSG00000226849	lncRNA	AL109811.1	0	0	0	0	0.195751	0.137516
ENSG00000226851	lncRNA	AC004112.1	0	0	0	0	0	0
ENSG00000226853	lncRNA	AC010894.2	2.53641	2.10678	1.14903	0.226899	0	0.307347
ENSG00000226854	lncRNA	AL451105.2	0	0	0	0	0	0
ENSG00000226856	lncRNA	THORLNC	0	0	0	0	0	0.0222313
ENSG00000226859	lncRNA	LINC02051	0	0	0	0	0.253625	0.445431
ENSG00000226861	lncRNA	AL390835.1	0	0	0	0	0	0
ENSG00000226862	lncRNA	AC104463.2	0	1.3419	0	0	0	0.391525
ENSG00000226868	lncRNA	AC096637.2	0	0	0	0	0	0
ENSG00000226869	lncRNA	LHFPL3-AS1	0	0	0	0	0	0
ENSG00000226871	lncRNA	AC135178.2	0	0	0	0	0	0
ENSG00000226872	lncRNA	AC002472.1	0	0	0	0	0	0
ENSG00000226876	lncRNA	AC092801.1	0	0	0	0	0	0
ENSG00000226877	lncRNA	AL354733.1	0	0	0	0	0	0
ENSG00000226883	lncRNA	AL035416.1	0	0	0	0	0	0
ENSG00000226889	lncRNA	AL359541.2	0	0	0.399662	0	0	0
ENSG00000226890	lncRNA	Z97652.1	0	0	0	0	0	0
ENSG00000226891	lncRNA	LINC01359	0	0	0	0	0	0
ENSG00000226899	lncRNA	AL731577.1	0	0	0	0	0	0
ENSG00000226900	lncRNA	AL451069.1	0	0	0	0	0	0
ENSG00000226903	lncRNA	LINC00354	0	0	0	0	0	0
ENSG00000226904	lncRNA	AL353608.2	0	1.23928	0	2.13552	2.05884	0.903962
ENSG00000226906	lncRNA	TTTY4	0	0	0	0	0	0
ENSG00000226913	lncRNA	BSN-DT	0	0	0	0	0	0.0415896
ENSG00000226917	lncRNA	LINC01276	0	0	0	0	0	0
ENSG00000226919	lncRNA	AL365184.1	0	0	0	0.0664904	0	0
ENSG00000226920	lncRNA	AL160004.1	0	0	0	0	0	0
ENSG00000226921	lncRNA	LINC00454	0.178746	0	0	0	0	0
ENSG00000226925	lncRNA	IL1R1-AS1	0	0	0	0	0	0
ENSG00000226927	lncRNA	AL451081.1	0	0	0	0	0	0
ENSG00000226935	lncRNA	LINC00161	0	0	0	0	0	0
ENSG00000226938	lncRNA	AC119428.1	0	0	0	0	0	0
ENSG00000226939	lncRNA	AC062021.1	0	0	0	0	0	0
ENSG00000226944	lncRNA	AL031847.1	0	0	0.607952	0	0	0
ENSG00000226950	lncRNA	DANCR	37.0437	37.647	41.0649	9.04476	8.79516	9.10952
ENSG00000226953	lncRNA	NCKAP5-AS2	0	0	0	0	0	0.209913
ENSG00000226954	lncRNA	AL023802.1	0.268758	0	0	0	0	0
ENSG00000226956	lncRNA	AP000432.1	0	0	0	0	0	0
ENSG00000226957	lncRNA	AL358075.1	0	0	0	0.27969	0	0
ENSG00000226963	lncRNA	AC078883.2	0	0	0	0	0	0
ENSG00000226965	lncRNA	AC073114.1	0	0.137205	0	0.118215	0.569851	0.240193
ENSG00000226968	lncRNA	LINC00423	0	0	0	0	0	0
ENSG00000226969	lncRNA	AL391845.1	0	0	0.427148	0.337396	0	0
ENSG00000226978	lncRNA	MAGI2-AS2	0	0	0	0	0	0
ENSG00000226983	lncRNA	LINC01692	0	0	0	0	0	0
ENSG00000226985	lncRNA	LINC01203	0.0721185	0.239611	0.130683	0	0	0.0262167
ENSG00000226990	lncRNA	AC025946.1	0	0	0	0	0	0
ENSG00000226992	lncRNA	AC145625.1	0	0	0	0	0	0
ENSG00000226994	lncRNA	AC012593.1	0	0	0	0	0	0
ENSG00000226995	lncRNA	LINC00658	0	0	0	0	0	0
ENSG00000226996	lncRNA	AP000477.1	0	0	0	0	0	0
ENSG00000227006	lncRNA	AL136988.2	0	0	0.173438	0.136995	0.396229	0.046392
ENSG00000227007	lncRNA	LINC01247	0	0	0	0	0	0
ENSG00000227011	lncRNA	LINC02876	0	0	0	0	0	0
ENSG00000227012	lncRNA	LINC02527	0.444204	0	0	0	0	0
ENSG00000227014	lncRNA	AC007285.1	0	0.742871	0.648253	0.576047	0.308535	0.303446
ENSG00000227016	lncRNA	LINC02796	0	0	0	0	0	0
ENSG00000227017	lncRNA	AC007036.1	0	0	0	0	0	0
ENSG00000227021	lncRNA	AC007557.1	0	0	0	0	0	0
ENSG00000227028	lncRNA	SLC8A1-AS1	0	0	0.0542315	0	0	0.007253
ENSG00000227029	lncRNA	AL139237.1	0	0	0	0	0	0
ENSG00000227033	lncRNA	AC019130.1	0	0	0	0	0	0
ENSG00000227036	lncRNA	LINC00511	1.68764	2.04172	1.99441	2.17266	2.27817	2.17835
ENSG00000227039	lncRNA	ITGB2-AS1	0.416145	0.864143	0.4713	0.521178	0	0.479048
ENSG00000227042	lncRNA	AC003666.1	0	0	0	0	0	0
ENSG00000227043	lncRNA	LINC01682	0	0	0	0	0	0
ENSG00000227045	lncRNA	AL589765.1	0	0	0	0	0	0
ENSG00000227047	lncRNA	AC012065.1	0	0	0	0	0	0.268817
ENSG00000227050	lncRNA	AL512288.1	0	0	0	0	0	0
ENSG00000227053	lncRNA	MUC12-AS1	0	0	0	0.445992	0	0
ENSG00000227060	lncRNA	LINC00629	0.361827	0	0.245869	0	0.0624112	0.0219221
ENSG00000227061	lncRNA	AC079779.1	0	0	0	0	0	0
ENSG00000227066	lncRNA	Z98257.1	0	0	0.078432	0.123904	0	0.104897
ENSG00000227068	lncRNA	AL162584.1	0	0	0	0	0	0
ENSG00000227070	lncRNA	EPS15-AS1	0	0.885202	0.96557	0	0	1.93706
ENSG00000227071	lncRNA	FOCAD-AS1	0	0	0	0	0	0
ENSG00000227075	lncRNA	AP000472.1	0	0	0	0	0	0
ENSG00000227076	lncRNA	AL158166.1	0	0	0	0	0	0.165686
ENSG00000227078	lncRNA	LINC02094	0	0	0	0	0	0
ENSG00000227082	lncRNA	LINC02798	0	0	0.0485129	0	0	0
ENSG00000227083	lncRNA	L29074.1	0	0	0	0	0	0
ENSG00000227088	lncRNA	AC012494.1	0	0	0	0	0	0
ENSG00000227089	lncRNA	AL031767.1	0	0	0	0	0	0
ENSG00000227090	lncRNA	AP000402.1	0	0	0	0	0	0
ENSG00000227091	lncRNA	AL355990.1	0	0	0	0.109349	0	0.111089
ENSG00000227094	lncRNA	AL512785.1	0	0	0	0	0	0
ENSG00000227098	lncRNA	AC073636.1	0	0	0	0	0	0
ENSG00000227101	lncRNA	AC025822.1	0	0	0	0	0	0
ENSG00000227107	lncRNA	AC104667.1	0	0	0	0	0	0
ENSG00000227110	lncRNA	LMCD1-AS1	0.180254	0	0.0204145	0.03225	0.139914	0.09829
ENSG00000227115	lncRNA	LINC01630	0.0552684	0.0918138	0.237855	0.0296648	0.047666	0.0636226
ENSG00000227117	lncRNA	HORMAD2-AS1	0	0	0	0	0	0
ENSG00000227121	lncRNA	LINC02672	0	0	0.142295	0	0	0
ENSG00000227125	lncRNA	AP002856.1	0	0	0	0	0	0
ENSG00000227128	lncRNA	LBX1-AS1	0	0	0	0	0	0
ENSG00000227131	lncRNA	AL139275.2	0	0	0	0	0	0
ENSG00000227139	lncRNA	AC241644.1	0	0	0	0	0	0
ENSG00000227143	lncRNA	LINC01153	0	0	0	0	0	0
ENSG00000227145	lncRNA	IL21-AS1	0	0	0.0584301	0	0	0
ENSG00000227148	lncRNA	AC069285.2	0	0	0	0	0	0
ENSG00000227150	lncRNA	AL669970.2	0	0	0	0	0	0
ENSG00000227155	lncRNA	AL161725.1	0	0	0	0	0.043576	0.0612245
ENSG00000227157	lncRNA	AC068535.1	0	0	0	0	0	0
ENSG00000227161	lncRNA	AC092755.1	0	0	0	0	0	0
ENSG00000227165	lncRNA	WDR11-AS1	0	0	0	0	0.0521535	0.0274785
ENSG00000227167	lncRNA	AL442638.1	0	0	0	0	0	0
ENSG00000227169	lncRNA	Z98747.1	0	0	0	0	0	0
ENSG00000227170	lncRNA	AF178030.1	0	0	0	0	0	0
ENSG00000227172	lncRNA	AC011290.1	0	0	0	0	0	0
ENSG00000227175	lncRNA	AL590677.2	0	0	0	0	0	0
ENSG00000227181	lncRNA	LINC01688	0	0	0	0	0	0
ENSG00000227186	lncRNA	AC018511.1	0	0	0	0	0.460529	0
ENSG00000227188	lncRNA	MGAT3-AS1	0	0	0	0	0	0
ENSG00000227189	lncRNA	AC092535.2	0	0	0	0	0	0
ENSG00000227192	lncRNA	AL023581.2	0	0	0.416315	0	0	0
ENSG00000227193	lncRNA	AC244453.1	0	0	0	0	0	0
ENSG00000227195	lncRNA	MIR663AHG	0	0	0	0.0274654	0	0.0558052
ENSG00000227197	lncRNA	AC009365.4	0	0	0	0	0	0
ENSG00000227198	lncRNA	C6orf47-AS1	0	0	0	0	0	0
ENSG00000227199	lncRNA	ST7-AS1	0.53709	0	0.243309	0.288278	0.648495	0.0650815
ENSG00000227200	lncRNA	AL162724.1	0	0	0	0.486646	0	0
ENSG00000227206	lncRNA	AL645937.2	0	0	0	0	0	0
ENSG00000227210	lncRNA	AC079145.1	0.131693	0.218773	0.178976	0.0471233	0.272587	0.0638312
ENSG00000227213	lncRNA	SPATA13-AS1	0	0	0	0	0	0
ENSG00000227214	lncRNA	HCG15	0.491552	0	0.44536	0.351781	0.678299	0.0595634
ENSG00000227215	lncRNA	AL355613.1	0	0	0	0	0	0
ENSG00000227217	lncRNA	AL356276.1	0	0	0	0	0	0
ENSG00000227218	lncRNA	AL157935.2	0	0.501615	0.182386	0	0.208335	0.121963
ENSG00000227220	lncRNA	AL133346.1	0	0.851225	1.85702	0	0	0
ENSG00000227227	lncRNA	AC017101.1	0	0	0	0	0	0.430609
ENSG00000227230	lncRNA	AL606534.1	0	0.607142	0.331132	0.261555	0.252163	0.442863
ENSG00000227237	lncRNA	AL672291.1	0	0	0	0	0	0
ENSG00000227240	lncRNA	AL136456.1	0	0	0	0	0	0
ENSG00000227244	lncRNA	LINC00845	0	0	0	0	0	0
ENSG00000227245	lncRNA	AC092042.1	0	0	0	0	0	0
ENSG00000227248	lncRNA	FAM155A-IT1	0	0	0	0	0	0
ENSG00000227252	lncRNA	AC012063.1	0.426091	0.28957	0.263217	0.22177	0.22717	0.229994
ENSG00000227253	lncRNA	AL158834.2	0	0	0.207219	0	0.631203	1.44112
ENSG00000227256	lncRNA	MIS18A-AS1	0	0.547928	0	0	0	0
ENSG00000227258	lncRNA	SMIM2-AS1	0.293622	0.406479	0.26603	0.105066	0.202587	0.142318
ENSG00000227260	lncRNA	LINC01985	1.66049	1.37924	0.752228	2.67376	2.86418	2.1127
ENSG00000227269	lncRNA	AL162427.1	0	0	0	0	0	0
ENSG00000227274	lncRNA	MYOCD-AS1	0	0	0	0	0	0
ENSG00000227278	lncRNA	AL603839.1	0	0	0	0	0	0
ENSG00000227279	lncRNA	AC110015.1	1.15291	0	0	0	0.39773	0
ENSG00000227282	lncRNA	AL389889.1	0	0	0	0	0	0
ENSG00000227290	lncRNA	LINC01364	0	0	0	0	0	0
ENSG00000227292	lncRNA	AC009229.1	0	0	0	0	0	0
ENSG00000227293	lncRNA	AC118345.1	0	0	0	0	0	0
ENSG00000227294	lncRNA	AC016994.1	0	0	0	0	0	0
ENSG00000227297	lncRNA	AL035541.1	0	0	0	0	0	0
ENSG00000227301	lncRNA	AL356489.1	0	0	0	0	0	0
ENSG00000227303	lncRNA	AC239727.1	0	0	0	0	0	0
ENSG00000227305	lncRNA	AC073188.2	0	0	0	0	0	0
ENSG00000227306	lncRNA	LINC02708	0	0	0	0	0	0
ENSG00000227307	lncRNA	AC010998.1	0	0	0	0	0	0
ENSG00000227308	lncRNA	LINC02832	0	0	0.0778739	0.061511	0.0593023	0.12498
ENSG00000227313	lncRNA	LINC02630	0	0	0	0	0	0
ENSG00000227330	lncRNA	AF130417.1	0	0	0	0	0	0
ENSG00000227336	lncRNA	LINC00434	0	0	0	0	0	0
ENSG00000227338	lncRNA	AL139280.1	0	0	0	0	0	0
ENSG00000227342	lncRNA	LINC00307	0	0	0	0	0	0
ENSG00000227352	lncRNA	ARHGEF7-AS1	0	0	0	0	0	0
ENSG00000227354	lncRNA	RBM26-AS1	0.901566	0.748856	1.12316	0.672093	0.64796	0.901285
ENSG00000227355	lncRNA	AL359644.1	0	0	0	0	0	0
ENSG00000227356	lncRNA	LINC00866	0	0	0	0	0	0
ENSG00000227359	lncRNA	AC017074.1	0	2.25324	1.63854	0.323563	1.87167	0.657427
ENSG00000227360	lncRNA	AL512658.1	0	0	0	0	0	0
ENSG00000227364	lncRNA	AC018685.1	0	0	0	0	0	0
ENSG00000227365	lncRNA	AC008060.2	0	0	0	0	0	0
ENSG00000227373	lncRNA	RABGAP1L-DT	0.129326	0.161131	0.117173	0.115691	0.133844	0.164545
ENSG00000227374	lncRNA	AL157832.1	0	0	0	0.366705	0	0
ENSG00000227375	lncRNA	DLG1-AS1	0.94952	1.57738	0.860293	0.594587	1.22837	0.747873
ENSG00000227386	lncRNA	AC091705.1	0	0	0	0	0	0
ENSG00000227388	lncRNA	AL133410.1	0.247817	0	0.112265	0.177351	0.0427457	0.240232
ENSG00000227392	lncRNA	HPN-AS1	0	0	0	0	0	0
ENSG00000227398	lncRNA	KIF9-AS1	2.25071	1.44734	1.67741	1.16908	1.62803	1.33725
ENSG00000227400	lncRNA	AC012501.2	0	0	0	0	0	0.374814
ENSG00000227403	lncRNA	LINC01806	1.83355	2.36907	2.39958	0.583193	0.773097	0.394984
ENSG00000227407	lncRNA	AC245884.1	0	0	0.434415	0	0	0.116199
ENSG00000227409	lncRNA	ZMYM4-AS1	0	0	0.500666	0	0	0
ENSG00000227418	lncRNA	PCGEM1	0	0	0	0	0	0
ENSG00000227421	lncRNA	LINC01724	0	0	0	0	0	0
ENSG00000227431	lncRNA	CSE1L-AS1	0	0	0	0	0	0
ENSG00000227432	lncRNA	ASIC4-AS1	0	0	0	0	0	0
ENSG00000227438	lncRNA	AP001471.1	0	0	0	0	0	0
ENSG00000227439	lncRNA	TTTY17B	0	0	0	0	0	0
ENSG00000227455	lncRNA	AL450345.1	0	0	0	0	0	0
ENSG00000227456	lncRNA	LINC00310	0.154659	0	0.0700627	0.0553411	0.053354	0.131185
ENSG00000227459	lncRNA	AC079612.2	0	0	0	0	0	0
ENSG00000227463	lncRNA	AL390838.1	0	0	0	0	0	0
ENSG00000227466	lncRNA	PDE4B-AS1	0	0	0	0	0	0
ENSG00000227467	lncRNA	LINC01537	0	0	0.281395	0.222268	0	0.57706
ENSG00000227475	lncRNA	AL355300.1	0	0	0	0	0	0
ENSG00000227477	lncRNA	STK4-AS1	0.245657	0	0	0.175805	0.169493	0.148836
ENSG00000227479	lncRNA	AC124861.1	0	0.982183	0	0	0	0.286571
ENSG00000227480	lncRNA	CCDC148-AS1	0	0	0	0	0	0
ENSG00000227481	lncRNA	AC008080.2	0	0	0	0	0	0
ENSG00000227482	lncRNA	AL157702.2	0	0	0	0	0	0.100522
ENSG00000227484	lncRNA	CR559946.1	0	0	0	0	0	0
ENSG00000227485	lncRNA	AL162400.1	0	0	0	0	0	0
ENSG00000227486	lncRNA	AL050309.1	0.0813994	0.169029	0.0921878	0.0291269	0.0702026	0.0838399
ENSG00000227487	lncRNA	NCAM1-AS1	0	0	0	0	0	0
ENSG00000227489	lncRNA	AC006458.1	0	0	0	0	0	0
ENSG00000227492	lncRNA	AL138921.1	0	0.328671	0.537767	0.283181	0	0.143844
ENSG00000227495	lncRNA	KIF1C-AS1	0	0	0	0.311353	0.300173	0
ENSG00000227496	lncRNA	AC099066.2	0.286034	0.475169	0.129578	0.869981	0.345364	1.00514
ENSG00000227498	lncRNA	AC018359.1	0	0	0	0	0	0
ENSG00000227502	lncRNA	MROCKI	0	0	0	0	0	0
ENSG00000227508	lncRNA	LINC01624	0	0	0	0	0	0
ENSG00000227509	lncRNA	LINC01839	0	0	0	0	0	0
ENSG00000227510	lncRNA	LINC01442	0	0	0	0	0	0
ENSG00000227512	lncRNA	AL592301.1	0	0	0	0.210091	0	0
ENSG00000227516	lncRNA	AL160163.2	0	0	0	0	0	0
ENSG00000227517	lncRNA	LINC01483	0	0.189204	0.154786	0.203771	0.196454	0.110408
ENSG00000227518	lncRNA	AL928970.1	0.867741	1.44152	1.65102	1.242	1.0178	1.40898
ENSG00000227519	lncRNA	AL008719.1	0	0	0	0	0	0
ENSG00000227527	lncRNA	AC096540.1	0	0	0	0.274613	0.264752	0.0929946
ENSG00000227528	lncRNA	DIAPH3-AS1	0	0	0	0	0	0
ENSG00000227531	lncRNA	AL162414.1	0	0	0	0	0	0
ENSG00000227533	lncRNA	SLC2A1-AS1	0.830636	0.68994	0.967603	1.4012	0.654975	0.934623
ENSG00000227535	lncRNA	AL357315.1	0	0	0	0	0	0
ENSG00000227540	lncRNA	AC016394.2	0.539661	2.68951	3.91159	1.73795	1.3032	2.28876
ENSG00000227542	lncRNA	AC092614.1	1.11613	0.463538	0.505623	0.199691	1.34764	0.202869
ENSG00000227543	lncRNA	SPAG5-AS1	0.661384	0.87897	0.599233	0.331325	0.319428	0.448799
ENSG00000227544	lncRNA	AC018647.1	0	0	0	0	0	0.0182836
ENSG00000227549	lncRNA	AC116035.1	0	0	0	0	0	0
ENSG00000227554	lncRNA	AL590422.1	0	0	0	0	0	0
ENSG00000227555	lncRNA	MIR4290HG	0	0	0	0	0	0
ENSG00000227562	lncRNA	AC074257.2	0	0	0	0	0	0
ENSG00000227564	lncRNA	LINC00376	0	0	0	0	0	0
ENSG00000227574	lncRNA	AC112229.2	0	0	0	0	0	0
ENSG00000227579	lncRNA	AL136114.1	0	0	0	0	0	0
ENSG00000227588	lncRNA	CNTN4-AS2	0	0	0	0	0	0
ENSG00000227589	lncRNA	AL136528.1	0	0	0	0	0	0
ENSG00000227591	lncRNA	HSD11B1-AS1	1.06348	0	0.481773	0.761085	1.46751	0.3866
ENSG00000227598	lncRNA	Z94721.1	0	0	0	0	0	0
ENSG00000227599	lncRNA	AL031676.1	0	0	0	0	0	0
ENSG00000227602	lncRNA	AL031779.1	0	0	0	0	0	0
ENSG00000227606	lncRNA	AC005392.1	0	0	0	0.363038	0	0
ENSG00000227610	lncRNA	FRMPD3-AS1	0	0	0	0	0	0
ENSG00000227611	lncRNA	LINC01074	0	0	0	0	0	0
ENSG00000227617	lncRNA	CERS6-AS1	4.23519	5.47216	3.73061	0.0420962	0	0.0285109
ENSG00000227619	lncRNA	AL391056.1	0	0	0	0	0	0
ENSG00000227627	lncRNA	AL080276.2	0.298138	0	0.135061	0.106682	0	0.0903166
ENSG00000227630	lncRNA	LINC01132	0.0997996	0.0828952	0	0.178555	0.103286	0.145118
ENSG00000227634	lncRNA	LINC01714	0	0	0	0	0.174826	0.061408
ENSG00000227640	lncRNA	SOX21-AS1	0.627306	1.56315	1.84716	0.299289	0.252475	0.304053
ENSG00000227646	lncRNA	STEAP2-AS1	0	0	0	0.150264	0	0
ENSG00000227658	lncRNA	AC005160.1	0	0	0	0	0	0
ENSG00000227659	lncRNA	CLYBL-AS2	0	0	0	0	0	0
ENSG00000227660	lncRNA	UST-AS1	0	0	0	0	0	0
ENSG00000227673	lncRNA	AL162734.1	0	0	0	0	0	0
ENSG00000227674	lncRNA	LINC00355	0	0	0	0	0	0.0437349
ENSG00000227676	lncRNA	LINC01068	0	0	0	0.358379	0.172755	0.303403
ENSG00000227678	lncRNA	AL355581.1	0.151021	0.125441	0.27366	0.0540396	0	0.0914996
ENSG00000227680	lncRNA	AC108051.1	0	0	0	0	0	0
ENSG00000227681	lncRNA	AL033504.1	0	0	0	0	0	0
ENSG00000227683	lncRNA	AL358394.1	0	0	0	0	0	0.229792
ENSG00000227685	lncRNA	LINC02088	0	0	0	0	0	0
ENSG00000227687	lncRNA	AL713965.1	0	0	0	0	0	0
ENSG00000227695	lncRNA	DNMBP-AS1	0	0.140218	0	0.0604056	0	0.102279
ENSG00000227698	lncRNA	AP001619.1	0	0	0.514107	0	0	0
ENSG00000227702	lncRNA	LINC00111	0	0	0	0	0	0
ENSG00000227704	lncRNA	AL354892.1	0	0	0	0	0	0
ENSG00000227705	lncRNA	AL391097.2	0	0	0	0	0	0
ENSG00000227706	lncRNA	AL713998.1	0	0	0	0	0	0.0113037
ENSG00000227708	lncRNA	LINC01850	0	0	0	0	0	0
ENSG00000227712	lncRNA	AL359915.1	0	0	0	0.186428	0.179734	0.10522
ENSG00000227713	lncRNA	AC092159.1	0	0	0	0	0	0
ENSG00000227716	lncRNA	AP000459.2	0	0	0	0	0	0
ENSG00000227718	lncRNA	AC016730.1	0	0	0	0	0	0.0738815
ENSG00000227719	lncRNA	AC006042.1	0	0	0.438561	0.34641	0.333972	0.234616
ENSG00000227723	lncRNA	AL596188.1	0	0	0	0	0	0
ENSG00000227726	lncRNA	AP001271.1	0	2.04542	0	0	0	0
ENSG00000227733	lncRNA	AC239809.3	0	0	0	0.0226164	0.0436085	0.0229764
ENSG00000227734	lncRNA	AL590378.1	0	0	0	0	0	0
ENSG00000227740	lncRNA	LINC02803	0.422382	1.40335	0.382691	0.453419	0.145713	0.204728
ENSG00000227741	lncRNA	AL121987.2	0	0.267019	0.436893	0.805217	0.554503	0.934897
ENSG00000227743	lncRNA	AC004875.1	0	0	0	0	0	0
ENSG00000227744	lncRNA	LINC01940	0	0	0.197597	0	0	0
ENSG00000227748	lncRNA	AL138916.1	0	0	0	0	0	0
ENSG00000227751	lncRNA	RCC2-AS1	0	0	0	7.00394	34.325	21.3463
ENSG00000227757	lncRNA	AP000282.1	0	0	0	0	0	0
ENSG00000227764	lncRNA	LINC01693	0	0	0	0	0.0731304	0
ENSG00000227769	lncRNA	AC072062.1	0	0	0	0	0.0458959	0
ENSG00000227773	lncRNA	ASH1L-IT1	0	0	0	0	0	0
ENSG00000227782	lncRNA	AC002553.1	0.63252	0.525382	1.14616	0.452666	1.74565	1.5329
ENSG00000227803	lncRNA	AL158198.1	0	0	0	0	0	0
ENSG00000227809	lncRNA	AL355674.1	0	0	0	0	0	0
ENSG00000227811	lncRNA	INKA2-AS1	0.630424	0.698188	0.475985	0.451165	0.434965	0.381956
ENSG00000227818	lncRNA	AL590408.1	0	0	0	0	0	0
ENSG00000227824	lncRNA	AC122136.1	0	0	0	0	0	0
ENSG00000227838	lncRNA	AL121885.2	0	0	0	0	0	0.150109
ENSG00000227848	lncRNA	SUCLA2-AS1	0.918988	0	0	0	0	0
ENSG00000227851	lncRNA	AC021035.1	0	0	0	0	0	0
ENSG00000227857	lncRNA	AL358075.2	0	1.24294	0	0.535454	0	1.08795
ENSG00000227863	lncRNA	AC002383.1	0	0	0	0	0	0
ENSG00000227880	lncRNA	AL050402.1	0	0	0	0	0	0
ENSG00000227885	lncRNA	AL590652.1	0.296021	0.24588	0.357605	0.882702	0.851007	1.0761
ENSG00000227888	lncRNA	FAM66A	0	0	0	0.297085	0	0
ENSG00000227893	lncRNA	LINC00352	0	0	0	0	0	0
ENSG00000227896	lncRNA	AL731569.1	0	0.137788	0.075149	0.118717	0.171682	0.0603036
ENSG00000227902	lncRNA	AC062032.1	0	0	0	0	0	0
ENSG00000227906	lncRNA	SNAP25-AS1	0	0	0	0.0124166	0	0
ENSG00000227907	lncRNA	AL158837.1	0	0	0	0	0	0
ENSG00000227908	lncRNA	AC016596.1	0.221617	0.368158	0.100396	0	0	0.0805628
ENSG00000227911	lncRNA	LINC02344	0	0	0	0	0	0
ENSG00000227912	lncRNA	AL441943.2	0	0	0	0	0	0
ENSG00000227914	lncRNA	AL136979.1	0	0	0	0	0	0
ENSG00000227917	lncRNA	AL449043.1	0	0	0	0	0	0
ENSG00000227920	lncRNA	AL353597.1	0	0	0	0	0	0
ENSG00000227925	lncRNA	LINC01655	0	0	0	0	0	0
ENSG00000227927	lncRNA	MACROD2-IT1	0	0	0	0	0	0
ENSG00000227929	lncRNA	SRGAP3-AS3	0	0	0	0	0	0
ENSG00000227930	lncRNA	AC003087.1	0	0	0	0	0	0
ENSG00000227933	lncRNA	AL357874.1	0	0	0	0.63247	0	0.10709
ENSG00000227935	lncRNA	AL390243.1	0	0	0	0	0	0
ENSG00000227938	lncRNA	AC104695.1	0	0.496297	0	0	0	0
ENSG00000227940	lncRNA	LINC01696	0	0	0	0	0	0
ENSG00000227945	lncRNA	AL590006.1	0	0	0	0	0	0
ENSG00000227946	lncRNA	AC007383.1	3.92481	2.85251	2.66699	7.72421	5.0774	4.39917
ENSG00000227947	lncRNA	LINC01738	0	0	0	0	0	0
ENSG00000227953	lncRNA	LINC01341	0	0.0883347	0	0	0.0366879	0.0257734
ENSG00000227954	lncRNA	TARID	0.1883	0.0521352	0.0568685	0.0898386	0.0216532	0.007606
ENSG00000227958	lncRNA	AL390778.1	0	0	0	0	0	0
ENSG00000227959	lncRNA	AL451042.2	1.68346	0.466102	2.28789	0.40159	1.16151	0.679972
ENSG00000227960	lncRNA	AL138799.1	0	0	0	0	0	0
ENSG00000227963	lncRNA	RBM15-AS1	0	0.322755	0	0.0695208	0.134049	0.117712
ENSG00000227964	lncRNA	LINC01429	0	0	0	0	0	0
ENSG00000227981	lncRNA	AC012668.1	0	0	0	0	0	0
ENSG00000227987	lncRNA	AC092675.2	0	0	0	0	0	0
ENSG00000228005	lncRNA	AC020743.1	0	0	0	0	0	0
ENSG00000228008	lncRNA	AC105935.1	0	0	0.499035	0	0.380024	0.133484
ENSG00000228010	lncRNA	AC073343.2	0	0	0.131694	0.104022	0.150431	0.228969
ENSG00000228013	lncRNA	IL6R-AS1	0.288885	0.479905	0	0	0	0.0700108
ENSG00000228016	lncRNA	RAPGEF4-AS1	0	0	0	0	0.0335444	0
ENSG00000228021	lncRNA	AL158835.1	0	0	0	0	0	0.0674303
ENSG00000228022	lncRNA	HCG20	0.966864	0	0.146001	0.230647	0.222365	0.234318
ENSG00000228027	lncRNA	AL136369.1	0	0	0	0	0	0
ENSG00000228028	lncRNA	AC069257.2	0	0	0.535678	0	0	0
ENSG00000228031	lncRNA	AC078842.2	0	0	0	0	0	0
ENSG00000228033	lncRNA	AC010967.1	0	0	0	0	0	0
[truncated: 14,883 more rows]

## Sheet: mRNA_COVID-19
Gene stable ID	Gene type	Gene name	SRX8089341	SRX8089342	SRX8089343	SRX8089344
ENSG00000000003	protein_coding	TSPAN6	2.54069	6.34597	0	0.999762
ENSG00000000005	protein_coding	TNMD	0	0.075444	0	0
ENSG00000000419	protein_coding	DPM1	91.028	29.707	0	9.39296
ENSG00000000457	protein_coding	SCYL3	1.83202	1.70681	0	2.47072
ENSG00000000460	protein_coding	C1orf112	0.623271	0.382376	0	0
ENSG00000000938	protein_coding	FGR	34.3818	50.8705	385.341	624.859
ENSG00000000971	protein_coding	CFH	11.4757	21.5036	0	7.67186
ENSG00000001036	protein_coding	FUCA2	21.1883	17.6779	0	12.0524
ENSG00000001084	protein_coding	GCLC	2.45865	1.9188	0	1.31554
ENSG00000001167	protein_coding	NFYA	21.575	5.8585	15.7225	6.54475
ENSG00000001460	protein_coding	STPG1	1.14155	1.23641	0	1.06566
ENSG00000001461	protein_coding	NIPAL3	2.28257	2.76729	0	0
ENSG00000001497	protein_coding	LAS1L	14.4155	10.6394	0	1.41995
ENSG00000001561	protein_coding	ENPP4	5.17464	2.44579	0	7.07971
ENSG00000001617	protein_coding	SEMA3F	19.7359	20.7782	0	0
ENSG00000001626	protein_coding	CFTR	0.706943	0.184808	0	0
ENSG00000001629	protein_coding	ANKIB1	5.63027	2.36605	12.1637	3.529
ENSG00000001630	protein_coding	CYP51A1	24.5438	11.328	29.7129	50.7592
ENSG00000001631	protein_coding	KRIT1	5.72274	3.12312	0	0
ENSG00000002016	protein_coding	RAD52	2.43306	1.79286	0	0.251772
ENSG00000002330	protein_coding	BAD	22.9351	41.5952	0	11.948
ENSG00000002549	protein_coding	LAP3	85.7048	37.5254	19.7881	85.0672
ENSG00000002586	protein_coding	CD99	76.1896	106.244	86.3376	115.053
ENSG00000002587	protein_coding	HS3ST1	1.22335	0.606576	0	0
ENSG00000002726	protein_coding	AOC1	0.121631	0.247521	0	0
ENSG00000002745	protein_coding	WNT16	0.205832	0.136465	0	0
ENSG00000002746	protein_coding	HECW1	0.0185431	0.179799	0	0
ENSG00000002822	protein_coding	MAD1L1	2.05861	2.56441	0	0.940855
ENSG00000002834	protein_coding	LASP1	33.6455	27.3539	4.2429	7.54642
ENSG00000002919	protein_coding	SNX11	17.8141	8.47671	0	0
ENSG00000002933	protein_coding	TMEM176A	10.7461	17.3582	34.4655	20.8682
ENSG00000003056	protein_coding	M6PR	108.996	30.7508	66.8544	76.847
ENSG00000003096	protein_coding	KLHL13	0.229424	0.398666	0	0
ENSG00000003137	protein_coding	CYP26B1	3.59645	0.555111	0	0
ENSG00000003147	protein_coding	ICA1	5.08012	8.20969	0	1.16089
ENSG00000003249	protein_coding	DBNDD1	0.76819	0.470607	4.36595	5.61743
ENSG00000003393	protein_coding	ALS2	4.52036	2.20833	0	0.977541
ENSG00000003400	protein_coding	CASP10	4.47194	4.34052	0	7.77654
ENSG00000003402	protein_coding	CFLAR	33.9082	13.3479	48.6458	70.6091
ENSG00000003436	protein_coding	TFPI	40.831	11.9778	8.95142	15.9694
ENSG00000003509	protein_coding	NDUFAF7	7.7852	2.54675	0	0.931578
ENSG00000003756	protein_coding	RBM5	30.7473	14.0256	4.33897	1.86091
ENSG00000003987	protein_coding	MTMR7	0.880224	0.723295	0	0.327289
ENSG00000003989	protein_coding	SLC7A2	18.8348	7.55751	3.7899	4.01574
ENSG00000004059	protein_coding	ARF5	64.649	86.0029	0	16.1518
ENSG00000004139	protein_coding	SARM1	0.91213	1.00776	0	0
ENSG00000004142	protein_coding	POLDIP2	42.3502	39.0786	39.2723	24.6278
ENSG00000004399	protein_coding	PLXND1	19.4183	26.1464	0	2.44489
ENSG00000004455	protein_coding	AK2	52.0662	13.918	6.22527	23.2047
ENSG00000004468	protein_coding	CD38	1.37169	0.95002	10.9228	20.9981
ENSG00000004478	protein_coding	FKBP4	70.808	14.2672	46.4213	20.6412
ENSG00000004487	protein_coding	KDM1A	24.9658	11.1969	0	0.625219
ENSG00000004534	protein_coding	RBM6	40.8396	15.4622	0	3.10653
ENSG00000004660	protein_coding	CAMKK1	1.20282	2.98875	0	0
ENSG00000004700	protein_coding	RECQL	21.4705	6.11437	0	5.70015
ENSG00000004766	protein_coding	VPS50	1.08128	1.04843	0	0.593017
ENSG00000004776	protein_coding	HSPB6	6.05527	60.5866	582.153	299.215
ENSG00000004777	protein_coding	ARHGAP33	0.225975	0.412819	0	0
ENSG00000004779	protein_coding	NDUFAB1	77.8866	44.24	0	9.52099
ENSG00000004799	protein_coding	PDK4	23.6562	65.8599	0	4.74051
ENSG00000004809	protein_coding	SLC22A16	0	0.0712537	0	0
ENSG00000004838	protein_coding	ZMYND10	2.66537	1.05998	0	0
ENSG00000004846	protein_coding	ABCB5	0.0558276	0	0	0
ENSG00000004848	protein_coding	ARX	0.0995753	0	0	0.364075
ENSG00000004864	protein_coding	SLC25A13	16.0889	3.70684	4.03762	7.63969
ENSG00000004866	protein_coding	ST7	7.68832	4.10439	0	2.69055
ENSG00000004897	protein_coding	CDC27	30.6033	8.33043	0	6.64554
ENSG00000004939	protein_coding	SLC4A1	0.0605029	0.0325918	0	0
ENSG00000004948	protein_coding	CALCR	0.0122261	0.0395157	0	0
ENSG00000004961	protein_coding	HCCS	34.1002	10.3371	0	27.5811
ENSG00000004975	protein_coding	DVL2	3.71013	4.78194	0	2.98294
ENSG00000005001	protein_coding	PRSS22	25.3195	0.140128	0	0
ENSG00000005007	protein_coding	UPF1	17.5831	11.0514	10.4509	2.50475
ENSG00000005020	protein_coding	SKAP2	7.15282	9.91833	5.58835	10.9968
ENSG00000005022	protein_coding	SLC25A5	403.633	175.662	221.563	276.324
ENSG00000005059	protein_coding	MCUB	7.95183	10.3368	12.641	5.7404
ENSG00000005073	protein_coding	HOXA11	0.0193629	0	0	0
ENSG00000005075	protein_coding	POLR2J	52.7857	34.968	0	51.8755
ENSG00000005100	protein_coding	DHX33	9.04326	5.18401	2.58759	3.32932
ENSG00000005102	protein_coding	MEOX1	0.2899	10.4734	0	0
ENSG00000005108	protein_coding	THSD7A	0.146696	0.530215	0	0
ENSG00000005156	protein_coding	LIG3	4.81504	1.24726	1.16112	1.31819
ENSG00000005175	protein_coding	RPAP3	4.95545	1.80042	0	1.27147
ENSG00000005187	protein_coding	ACSM3	0.254613	0.437414	0	0.452888
ENSG00000005189	protein_coding	REXO5	0.339171	0.636084	0	0
ENSG00000005194	protein_coding	CIAPIN1	20.0883	9.0684	0	4.02151
ENSG00000005206	protein_coding	SPPL2B	1.30958	2.67169	0	0.305629
ENSG00000005238	protein_coding	FAM214B	14.3855	4.60433	0	0.176897
ENSG00000005243	protein_coding	COPZ2	2.02176	26.9735	0	0
ENSG00000005249	protein_coding	PRKAR2B	0.776043	7.94275	0	5.8522
ENSG00000005302	protein_coding	MSL3	7.61983	3.29625	1.53165	6.72355
ENSG00000005339	protein_coding	CREBBP	6.84432	3.26246	3.87094	3.00297
ENSG00000005379	protein_coding	TSPOAP1	0.739641	0.547537	0	0
ENSG00000005381	protein_coding	MPO	0.234441	0.599873	0	1.28577
ENSG00000005421	protein_coding	PON1	0.505709	0.0838203	0	0
ENSG00000005436	protein_coding	GCFC2	5.27961	3.77165	0	0
ENSG00000005448	protein_coding	WDR54	11.2709	7.00851	0	2.78265
ENSG00000005469	protein_coding	CROT	0.695427	1.33072	0	0
ENSG00000005471	protein_coding	ABCB4	0.0334409	0.165729	0	0
ENSG00000005483	protein_coding	KMT2E	28.0085	9.30106	0	5.4698
ENSG00000005486	protein_coding	RHBDD2	41.2572	44.5421	0	5.218
ENSG00000005513	protein_coding	SOX8	0.612756	0.0871909	0	0
ENSG00000005700	protein_coding	IBTK	10.7935	3.83786	0	1.82042
ENSG00000005801	protein_coding	ZNF195	3.92749	1.81139	0	0.580854
ENSG00000005810	protein_coding	MYCBP2	6.08052	2.32643	0	0.354579
ENSG00000005812	protein_coding	FBXL3	12.0508	4.93356	0	2.72377
ENSG00000005844	protein_coding	ITGAL	8.42383	3.02228	2.33654	3.71367
ENSG00000005882	protein_coding	PDK2	2.28596	5.8517	0	0
ENSG00000005884	protein_coding	ITGA3	18.9752	9.63936	3.05643	5.3205
ENSG00000005889	protein_coding	ZFX	4.57493	1.82984	0	1.50545
ENSG00000005893	protein_coding	LAMP2	16.0688	7.28238	11.1503	26.7639
ENSG00000005961	protein_coding	ITGA2B	0.317609	0.273744	2.6303	0
ENSG00000005981	protein_coding	ASB4	0.0448802	0.145057	0	0
ENSG00000006007	protein_coding	GDE1	15.3744	11.3765	0	1.54952
ENSG00000006015	protein_coding	REX1BD	5.82737	20.338	4.44498	0.336418
ENSG00000006016	protein_coding	CRLF1	2.05534	7.03711	0	1.91057
ENSG00000006025	protein_coding	OSBPL7	1.59631	2.20271	0	0
ENSG00000006042	protein_coding	TMEM98	5.62926	7.87881	5.77581	2.84143
ENSG00000006047	protein_coding	YBX2	0	0.0120228	0	0
ENSG00000006059	protein_coding	KRT33A	0	0	0	0
ENSG00000006062	protein_coding	MAP3K14	10.0752	6.72886	2.64283	1.60018
ENSG00000006071	protein_coding	ABCC8	0.0574765	0.482115	0	0
ENSG00000006116	protein_coding	CACNG3	0	0.054091	0	0
ENSG00000006118	protein_coding	TMEM132A	5.44445	0.735119	0	5.30145
ENSG00000006125	protein_coding	AP2B1	45.4367	21.0726	7.89333	18.669
ENSG00000006128	protein_coding	TAC1	2.05269	1.30088	0	0
ENSG00000006194	protein_coding	ZNF263	16.9333	14.0433	0	2.65593
ENSG00000006210	protein_coding	CX3CL1	36.3405	32.9395	27.6469	25.4899
ENSG00000006282	protein_coding	SPATA20	1.01674	5.35181	2.80674	2.54914
ENSG00000006283	protein_coding	CACNA1G	0.508475	0.0664015	0	0
ENSG00000006327	protein_coding	TNFRSF12A	258.09	31.635	40.5291	46.0118
ENSG00000006377	protein_coding	DLX6	0	0.0808094	0	0
ENSG00000006432	protein_coding	MAP3K9	3.44225	0.0629329	3.62819	0
ENSG00000006451	protein_coding	RALA	74.1044	24.7975	4.18541	33.5779
ENSG00000006453	protein_coding	BAIAP2L1	18.6415	8.26907	0	0.47033
ENSG00000006459	protein_coding	KDM7A	30.8656	2.32732	0	4.35213
ENSG00000006468	protein_coding	ETV1	1.16098	3.05749	0	0
ENSG00000006530	protein_coding	AGK	4.15485	1.94146	2.8007	3.17957
ENSG00000006534	protein_coding	ALDH3B1	3.53318	7.54581	0	1.02662
ENSG00000006555	protein_coding	TTC22	0.482038	0.0819995	0	0
ENSG00000006576	protein_coding	PHTF2	1.51225	1.49401	0	0
ENSG00000006606	protein_coding	CCL26	0.878407	0.709772	0	0
ENSG00000006607	protein_coding	FARP2	3.49541	2.00689	2.08469	0.473341
ENSG00000006611	protein_coding	USH1C	0	0.053191	0	0.270774
ENSG00000006625	protein_coding	GGCT	33.1994	23.298	18.7949	24.1824
ENSG00000006634	protein_coding	DBF4	3.12664	1.10265	0	0
ENSG00000006638	protein_coding	TBXA2R	0.420457	1.81194	0	0
ENSG00000006652	protein_coding	IFRD1	70.4205	8.97617	18.067	25.221
ENSG00000006659	protein_coding	LGALS14	0.285838	0	0	0
ENSG00000006695	protein_coding	COX10	2.73085	1.62352	0	0.335622
ENSG00000006704	protein_coding	GTF2IRD1	4.25494	2.14211	0	0
ENSG00000006712	protein_coding	PAF1	54.5809	26.4518	26.2799	3.978
ENSG00000006715	protein_coding	VPS41	4.09997	5.75307	5.79705	3.65625
ENSG00000006740	protein_coding	ARHGAP44	2.1122	2.44284	0	0
ENSG00000006744	protein_coding	ELAC2	8.28113	6.95772	0	0.32383
ENSG00000006747	protein_coding	SCIN	0.524531	0.0814141	0	0
ENSG00000006756	protein_coding	ARSD	2.99368	3.70867	0	0.322724
ENSG00000006757	protein_coding	PNPLA4	1.18177	2.07302	0	6.31512
ENSG00000006788	protein_coding	MYH13	0.0422219	0	0	0
ENSG00000006831	protein_coding	ADIPOR2	22.0155	32.2359	0	4.08306
ENSG00000006837	protein_coding	CDKL3	0.656457	0.406664	0	2.5202
ENSG00000007001	protein_coding	UPP2	0	0	0	0
ENSG00000007038	protein_coding	PRSS21	3.17907	0	0	0
ENSG00000007047	protein_coding	MARK4	3.68031	1.56426	0	0.170332
ENSG00000007062	protein_coding	PROM1	0.750793	0.17975	0	0.76253
ENSG00000007080	protein_coding	CCDC124	63.6583	47.4316	9.0184	7.50815
ENSG00000007129	protein_coding	CEACAM21	2.66632	2.02771	0	0
ENSG00000007168	protein_coding	PAFAH1B1	33.9165	15.4453	5.46766	14.2078
ENSG00000007171	protein_coding	NOS2	7.97691	0.20251	0	2.57724
ENSG00000007174	protein_coding	DNAH9	0.137275	0.052585	0	0
ENSG00000007202	protein_coding	KIAA0100	19.4974	8.99213	0	1.22804
ENSG00000007216	protein_coding	SLC13A2	0.0160197	0	0	0
ENSG00000007237	protein_coding	GAS7	4.71256	7.70667	4.44938	8.19429
ENSG00000007255	protein_coding	TRAPPC6A	8.03166	38.4313	0	4.86058
ENSG00000007264	protein_coding	MATK	3.05981	2.15283	0	0
ENSG00000007306	protein_coding	CEACAM7	0.0973984	0	0	0
ENSG00000007312	protein_coding	CD79B	2.98152	7.4683	14.4034	0
ENSG00000007314	protein_coding	SCN4A	0.137929	0.087809	0	0
ENSG00000007341	protein_coding	ST7L	3.74785	1.93649	12.9325	2.51691
ENSG00000007350	protein_coding	TKTL1	0.747493	0.0473718	0	0
ENSG00000007372	protein_coding	PAX6	0.007512	0.0269769	0	0.549314
ENSG00000007376	protein_coding	RPUSD1	2.81821	3.11666	0	2.86606
ENSG00000007384	protein_coding	RHBDF1	24.4305	8.87171	0	0.922857
ENSG00000007392	protein_coding	LUC7L	30.9525	14.0727	2.42545	3.48783
ENSG00000007402	protein_coding	CACNA2D2	2.03547	1.84066	0	0.179331
ENSG00000007516	protein_coding	BAIAP3	0.521337	0.987449	0	1.1068
ENSG00000007520	protein_coding	TSR3	27.4628	42.6555	12.3798	0
ENSG00000007541	protein_coding	PIGQ	1.78499	2.9304	0	0.717187
ENSG00000007545	protein_coding	CRAMP1	5.0862	3.01188	0	0
ENSG00000007866	protein_coding	TEAD3	18.543	13.9879	0	1.11551
ENSG00000007908	protein_coding	SELE	14.8863	102.48	58.7946	126.822
ENSG00000007923	protein_coding	DNAJC11	11.072	6.12312	0	0
ENSG00000007933	protein_coding	FMO3	0.811485	6.58936	0	0
ENSG00000007944	protein_coding	MYLIP	27.8417	17.8524	0	15.1312
ENSG00000007952	protein_coding	NOX1	0	0.109472	0	0
ENSG00000007968	protein_coding	E2F2	0.123002	0.234454	0	0
ENSG00000008018	protein_coding	PSMB1	208.116	91.1819	13.5012	21.4586
ENSG00000008056	protein_coding	SYN1	1.79972	0.969474	72.2294	23.689
ENSG00000008083	protein_coding	JARID2	8.08632	3.56679	2.39903	1.81571
ENSG00000008086	protein_coding	CDKL5	1.28548	0.712917	0	0.237979
ENSG00000008118	protein_coding	CAMK1G	2.06532	0.200761	4.50107	12.2639
ENSG00000008128	protein_coding	CDK11A	8.89275	17.946	11.7833	3.34434
ENSG00000008130	protein_coding	NADK	18.6585	20.4818	45.7186	34.1951
ENSG00000008196	protein_coding	TFAP2B	0	0.117597	0	0
ENSG00000008197	protein_coding	TFAP2D	0	0.23999	0	0
ENSG00000008226	protein_coding	DLEC1	0.712779	0.0734534	0	0
ENSG00000008256	protein_coding	CYTH3	10.7221	12.5198	0	2.53762
ENSG00000008277	protein_coding	ADAM22	0.131328	0.196257	0	0
ENSG00000008282	protein_coding	SYPL1	105.055	30.5592	5.34221	14.1514
ENSG00000008283	protein_coding	CYB561	7.84562	7.89538	8.4854	0.642219
ENSG00000008294	protein_coding	SPAG9	44.7219	7.12838	7.51107	15.0646
ENSG00000008300	protein_coding	CELSR3	0.354481	0.0964811	0	0
ENSG00000008311	protein_coding	AASS	6.16526	5.80672	0	2.38179
ENSG00000008323	protein_coding	PLEKHG6	1.40724	0.287537	0	0
ENSG00000008324	protein_coding	SS18L2	43.3185	20.0748	0	49.7863
ENSG00000008382	protein_coding	MPND	2.54741	7.88019	0	0
ENSG00000008394	protein_coding	MGST1	27.9689	5.82402	9.64246	15.5081
ENSG00000008405	protein_coding	CRY1	22.6625	6.12431	0	6.16415
ENSG00000008438	protein_coding	PGLYRP1	0.58395	8.17864	253.891	177.746
ENSG00000008441	protein_coding	NFIX	1.97632	3.17174	9.50782	6.2965
ENSG00000008513	protein_coding	ST3GAL1	58.7204	12.1142	1.69222	6.01958
ENSG00000008516	protein_coding	MMP25	1.30234	1.50799	21.1675	8.27735
ENSG00000008517	protein_coding	IL32	780.831	68.6037	214.727	161.457
ENSG00000008710	protein_coding	PKD1	0.568827	0.45662	0	0.428192
ENSG00000008735	protein_coding	MAPK8IP2	0.133816	0.0192224	0	0
ENSG00000008838	protein_coding	MED24	156.33	18.0341	10.7581	6.35097
ENSG00000008853	protein_coding	RHOBTB2	2.59969	4.9416	0	0.516898
ENSG00000008869	protein_coding	HEATR5B	3.32486	1.87214	0	1.92671
ENSG00000008952	protein_coding	SEC62	33.4731	21.7289	5.66835	11.2973
ENSG00000008988	protein_coding	RPS20	750.077	549.228	384.219	450.924
ENSG00000009307	protein_coding	CSDE1	145.755	100.332	41.4803	62.0039
ENSG00000009335	protein_coding	UBE3C	14.5084	5.12367	3.25113	1.23031
ENSG00000009413	protein_coding	REV3L	4.75827	2.62144	0	0.182492
ENSG00000009694	protein_coding	TENM1	0.0921705	0.0949836	0	0.52748
ENSG00000009709	protein_coding	PAX7	0	0	0	0
ENSG00000009724	protein_coding	MASP2	0.0728395	0.0784745	0	0
ENSG00000009765	protein_coding	IYD	0.0498741	0.0698523	0	0
ENSG00000009780	protein_coding	FAM76A	2.12663	3.57474	0	2.52939
ENSG00000009790	protein_coding	TRAF3IP3	3.91431	0.86929	0	2.77947
ENSG00000009830	protein_coding	POMT2	4.01229	1.86371	0	0.113282
ENSG00000009844	protein_coding	VTA1	7.71847	3.33698	0	3.43649
ENSG00000009950	protein_coding	MLXIPL	0.193195	0.13876	0	0.941832
ENSG00000009954	protein_coding	BAZ1B	22.0553	9.89737	4.2435	6.4234
ENSG00000010017	protein_coding	RANBP9	10.1417	6.7558	8.28058	9.40075
ENSG00000010030	protein_coding	ETV7	9.6219	5.88673	0	41.5478
ENSG00000010072	protein_coding	SPRTN	2.80011	1.39524	0	0.191962
ENSG00000010165	protein_coding	EEF1AKNMT	13.8676	7.36846	0	6.80652
ENSG00000010219	protein_coding	DYRK4	5.02583	3.59924	0	3.37515
ENSG00000010244	protein_coding	ZNF207	31.3687	8.37591	1.89208	8.09091
ENSG00000010256	protein_coding	UQCRC1	44.1631	40.2811	0	5.66157
ENSG00000010270	protein_coding	STARD3NL	25.2455	10.9358	0	4.9542
ENSG00000010278	protein_coding	CD9	79.8335	70.984	0	15.5156
ENSG00000010282	protein_coding	HHATL	0.0536838	0	0	0
ENSG00000010292	protein_coding	NCAPD2	4.07366	2.36651	0	0.876144
ENSG00000010295	protein_coding	IFFO1	3.30757	7.44794	0	0
ENSG00000010310	protein_coding	GIPR	0.489371	0.142791	0	0
ENSG00000010318	protein_coding	PHF7	0.78349	1.15857	0	0
ENSG00000010319	protein_coding	SEMA3G	0.665578	13.9553	0	1.79708
ENSG00000010322	protein_coding	NISCH	10.6302	11.9011	4.95903	0.125108
ENSG00000010327	protein_coding	STAB1	5.22751	8.05612	2.82954	0.107077
ENSG00000010361	protein_coding	FUZ	1.12005	3.16757	0	0
ENSG00000010379	protein_coding	SLC6A13	0.341039	0.170589	0	0
ENSG00000010404	protein_coding	IDS	19.9901	18.032	9.67048	11.4666
ENSG00000010438	protein_coding	PRSS3	0.776436	0.200761	0	0
ENSG00000010539	protein_coding	ZNF200	2.4606	1.00246	5.99343	1.20963
ENSG00000010610	protein_coding	CD4	9.36742	29.8487	121.625	72.6463
ENSG00000010626	protein_coding	LRRC23	4.06393	5.89249	0	0
ENSG00000010671	protein_coding	BTK	3.91974	5.67121	6.54844	3.71715
ENSG00000010704	protein_coding	HFE	0.309622	0.451308	0	0
ENSG00000010803	protein_coding	SCMH1	19.3377	8.17574	0	4.07908
ENSG00000010810	protein_coding	FYN	19.0164	15.1684	2.02126	4.58938
ENSG00000010818	protein_coding	HIVEP2	49.0362	4.74475	2.81174	3.61772
ENSG00000010932	protein_coding	FMO1	0.0860848	0.355521	0	0
ENSG00000011007	protein_coding	ELOA	39.9843	11.1954	11.1145	15.9828
ENSG00000011009	protein_coding	LYPLA2	50.1709	30.8555	0	15.1463
ENSG00000011021	protein_coding	CLCN6	6.71525	3.09282	0	0
ENSG00000011028	protein_coding	MRC2	2.44637	5.95551	0	7.2245
ENSG00000011052	protein_coding	NME1-NME2	85.8689	28.8034	0	0
ENSG00000011083	protein_coding	SLC6A7	0.181247	0.117161	0	0
ENSG00000011105	protein_coding	TSPAN9	6.21203	22.6017	0	1.14933
ENSG00000011114	protein_coding	BTBD7	4.40049	2.46626	0	0.700266
ENSG00000011132	protein_coding	APBA3	5.02389	1.41284	2.67683	4.86232
ENSG00000011143	protein_coding	MKS1	1.44612	2.61032	0	0
ENSG00000011198	protein_coding	ABHD5	17.5693	4.80782	0	6.46643
ENSG00000011201	protein_coding	ANOS1	1.65649	1.22645	0	0
ENSG00000011243	protein_coding	AKAP8L	18.0202	9.90994	2.94931	3.57151
ENSG00000011258	protein_coding	MBTD1	2.99258	2.30182	0	0
ENSG00000011260	protein_coding	UTP18	41.6993	11.2262	0	9.22755
ENSG00000011275	protein_coding	RNF216	6.64733	4.74272	0	0.595212
ENSG00000011295	protein_coding	TTC19	19.9923	10.3372	7.42298	2.62177
ENSG00000011304	protein_coding	PTBP1	65.2246	44.1506	28.2921	23.5542
ENSG00000011332	protein_coding	DPF1	0.150732	0.046398	0	0
ENSG00000011347	protein_coding	SYT7	0.711689	1.51875	0	0
ENSG00000011376	protein_coding	LARS2	1.34125	0.574413	0	0.822404
ENSG00000011405	protein_coding	PIK3C2A	7.60258	6.26101	0	7.88339
ENSG00000011422	protein_coding	PLAUR	291.467	26.3835	319.286	250.301
ENSG00000011426	protein_coding	ANLN	0.206822	0.037137	0	0
ENSG00000011451	protein_coding	WIZ	3.89772	2.78471	0	1.92024
ENSG00000011454	protein_coding	RABGAP1	8.90034	6.39462	4.9108	2.60172
ENSG00000011465	protein_coding	DCN	32.4707	118.277	11.9378	32.0748
ENSG00000011478	protein_coding	QPCTL	0.51376	0.0503187	0	2.04922
ENSG00000011485	protein_coding	PPP5C	6.40072	8.08186	0	1.43935
ENSG00000011523	protein_coding	CEP68	2.37332	3.0993	0	0
ENSG00000011566	protein_coding	MAP4K3	8.34588	3.06153	0	1.49766
ENSG00000011590	protein_coding	ZBTB32	2.3019	0.0609832	0	0
ENSG00000011600	protein_coding	TYROBP	175.209	212.52	3187.49	2892.45
ENSG00000011638	protein_coding	TMEM159	12.3643	7.46577	0	4.4321
ENSG00000011677	protein_coding	GABRA3	0	0.0402489	0	0
ENSG00000012048	protein_coding	BRCA1	0.249901	0.287183	0	0
ENSG00000012061	protein_coding	ERCC1	55.322	15.3074	0	5.69305
ENSG00000012124	protein_coding	CD22	4.52668	0.469625	0	0.551693
ENSG00000012171	protein_coding	SEMA3B	7.78599	4.5851	0	0.196555
ENSG00000012174	protein_coding	MBTPS2	1.28838	0.815402	1.67463	3.80234
ENSG00000012211	protein_coding	PRICKLE3	4.66473	1.81226	0	0.620202
ENSG00000012223	protein_coding	LTF	2.83726	3.83839	45.0626	21.0318
ENSG00000012232	protein_coding	EXTL3	2.93535	3.30754	0	0.608317
ENSG00000012504	protein_coding	NR1H4	0.0142447	0.291586	0	0
ENSG00000012660	protein_coding	ELOVL5	70.8443	26.3129	7.8571	22.8946
ENSG00000012779	protein_coding	ALOX5	11.0564	22.3158	28.1118	13.0698
ENSG00000012817	protein_coding	KDM5D	8.57959	5.26593	1.58296	5.75072
ENSG00000012822	protein_coding	CALCOCO1	13.9682	13.1904	0	5.73363
ENSG00000012963	protein_coding	UBR7	16.3036	8.5841	0	3.55401
ENSG00000012983	protein_coding	MAP4K5	19.641	5.07821	0	1.04148
ENSG00000013016	protein_coding	EHD3	2.87049	4.51191	0	2.3497
ENSG00000013275	protein_coding	PSMC4	115.458	36.4197	70.4921	95.589
ENSG00000013288	protein_coding	MAN2B2	2.78642	5.43365	16.8613	1.27615
ENSG00000013293	protein_coding	SLC7A14	0.009847	0.0689605	0	0
ENSG00000013297	protein_coding	CLDN11	2.25717	5.32608	0	0
ENSG00000013306	protein_coding	SLC25A39	35.2934	29.0231	25.4899	18.9705
ENSG00000013364	protein_coding	MVP	33.7377	36.239	12.1964	4.24618
ENSG00000013374	protein_coding	NUB1	33.0077	14.0763	11.0734	24.0952
ENSG00000013375	protein_coding	PGM3	19.7375	2.91865	2.00315	2.57735
ENSG00000013392	protein_coding	RWDD2A	3.13999	1.5068	0	0
ENSG00000013441	protein_coding	CLK1	98.2712	26.708	0	14.6924
ENSG00000013503	protein_coding	POLR3B	1.68002	0.782383	0	0
ENSG00000013523	protein_coding	ANGEL1	6.2022	4.1544	0	0.178091
ENSG00000013561	protein_coding	RNF14	10.7545	8.48336	0	6.36416
ENSG00000013563	protein_coding	DNASE1L1	6.92897	13.6769	0	1.64627
ENSG00000013573	protein_coding	DDX11	2.693	3.01446	0	0.813001
ENSG00000013583	protein_coding	HEBP1	28.5534	13.4159	0	9.26034
ENSG00000013588	protein_coding	GPRC5A	115.232	21.7103	30.1721	15.0448
ENSG00000013619	protein_coding	MAMLD1	22.3615	3.03713	2.51419	1.14172
ENSG00000013725	protein_coding	CD6	5.83759	0.831707	0	0
ENSG00000013810	protein_coding	TACC3	1.4618	1.69708	0	0.967582
ENSG00000014123	protein_coding	UFL1	4.8503	2.47783	0	1.49865
ENSG00000014138	protein_coding	POLA2	4.9285	1.31994	0	0.203615
ENSG00000014164	protein_coding	ZC3H3	3.69438	1.60105	8.05137	2.74216
ENSG00000014216	protein_coding	CAPN1	10.0308	12.3916	0	4.20289
ENSG00000014257	protein_coding	ACP3	0.241493	0.208141	0	0.52978
ENSG00000014641	protein_coding	MDH1	19.5947	12.9654	0	5.45281
ENSG00000014824	protein_coding	SLC30A9	7.30076	7.23136	6.24235	2.20478
ENSG00000014914	protein_coding	MTMR11	3.19889	5.58968	16.3819	0
ENSG00000014919	protein_coding	COX15	5.81504	5.03858	0	3.79991
ENSG00000015133	protein_coding	CCDC88C	2.62432	0.707957	0	0.364954
ENSG00000015153	protein_coding	YAF2	2.38397	1.44857	0	2.40574
ENSG00000015171	protein_coding	ZMYND11	22.037	13.9929	0	12.1929
ENSG00000015285	protein_coding	WAS	2.80177	4.50421	139.581	106.122
ENSG00000015413	protein_coding	DPEP1	0	0.345824	0	0
ENSG00000015475	protein_coding	BID	30.0709	9.02915	33.6922	22.44
ENSG00000015479	protein_coding	MATR3	3.09304	5.08394	28.735	20.6607
ENSG00000015520	protein_coding	NPC1L1	0.501839	0.243828	0	0
ENSG00000015532	protein_coding	XYLT2	4.04219	2.98128	0	0.207187
ENSG00000015568	protein_coding	RGPD5	0.116584	0.129529	0	0.559472
ENSG00000015592	protein_coding	STMN4	0.031378	0.118319	0	0
ENSG00000015676	protein_coding	NUDCD3	10.0141	7.11377	0	0.572996
ENSG00000016082	protein_coding	ISL1	0	0	0	0
ENSG00000016391	protein_coding	CHDH	0.524295	0.715008	0	0
ENSG00000016402	protein_coding	IL20RA	0.557222	1.61265	0	3.59534
ENSG00000016490	protein_coding	CLCA1	0	0	0	0
ENSG00000016602	protein_coding	CLCA4	0	0	0	0
ENSG00000016864	protein_coding	GLT8D1	14.3304	10.9206	0	0
ENSG00000017260	protein_coding	ATP2C1	17.6242	6.29008	1.75549	8.23758
ENSG00000017427	protein_coding	IGF1	0.216339	1.48072	0	1.67505
ENSG00000017483	protein_coding	SLC38A5	33.7499	7.2611	0	0.282163
ENSG00000017797	protein_coding	RALBP1	10.0454	11.6604	0	3.38385
ENSG00000018189	protein_coding	RUFY3	8.88526	5.39904	0	0.602727
ENSG00000018236	protein_coding	CNTN1	0.0275919	0.163495	0	1.2106
ENSG00000018280	protein_coding	SLC11A1	14.7486	5.73718	13.8124	3.78955
ENSG00000018408	protein_coding	WWTR1	26.1316	19.0865	5.34158	7.54652
ENSG00000018510	protein_coding	AGPS	4.61321	2.89398	0	1.15295
ENSG00000018610	protein_coding	CXorf56	1.52234	2.24437	0	0
ENSG00000018625	protein_coding	ATP1A2	0.0984686	6.55083	0	1.2601
ENSG00000018699	protein_coding	TTC27	9.81657	3.07254	0	2.63428
ENSG00000018869	protein_coding	ZNF582	1.37298	1.5623	0	0
ENSG00000019102	protein_coding	VSIG2	27.6791	12.0821	0	0
ENSG00000019144	protein_coding	PHLDB1	8.25588	9.94582	0.689826	0
ENSG00000019169	protein_coding	MARCO	30.4261	51.3391	50.4363	9.81584
ENSG00000019186	protein_coding	CYP24A1	1.0367	0.0698065	0	7.6757
ENSG00000019485	protein_coding	PRDM11	1.2716	1.61361	0	0.0813293
ENSG00000019505	protein_coding	SYT13	0	0	0	0.832859
ENSG00000019549	protein_coding	SNAI2	6.6785	11.6243	0	3.80098
ENSG00000019582	protein_coding	CD74	537.565	604.638	2638.66	2422.81
ENSG00000019991	protein_coding	HGF	5.71745	2.35201	0	1.16244
ENSG00000019995	protein_coding	ZRANB1	13.8577	2.4341	0	0
ENSG00000020129	protein_coding	NCDN	3.16363	2.70632	0	0
ENSG00000020181	protein_coding	ADGRA2	0.401239	4.33066	0	0
ENSG00000020256	protein_coding	ZFP64	0.768724	0.885594	0	1.50273
ENSG00000020426	protein_coding	MNAT1	5.81179	3.82003	0	0
ENSG00000020577	protein_coding	SAMD4A	19.3594	6.71761	3.64378	2.7578
ENSG00000020633	protein_coding	RUNX3	10.5804	4.29615	6.62373	0.751976
ENSG00000020922	protein_coding	MRE11	2.35915	1.95513	0	0
ENSG00000021300	protein_coding	PLEKHB1	1.22573	2.37022	0	1.14913
ENSG00000021355	protein_coding	SERPINB1	267.37	101.451	206.479	293.572
ENSG00000021461	protein_coding	CYP3A43	0.117587	0	0	0
ENSG00000021488	protein_coding	SLC7A9	0.119352	0.428619	0	0
ENSG00000021574	protein_coding	SPAST	1.24706	1.36701	0	0.119466
ENSG00000021645	protein_coding	NRXN3	0.269494	0.179224	0	0.656896
ENSG00000021762	protein_coding	OSBPL5	5.77445	4.60441	0	0
ENSG00000021776	protein_coding	AQR	5.76013	2.09346	1.1153	1.94146
ENSG00000021826	protein_coding	CPS1	0.0938094	0.25772	0	0.102898
ENSG00000021852	protein_coding	C8B	0.302662	0.101899	0	0
ENSG00000022267	protein_coding	FHL1	23.0275	90.1841	0	9.28336
ENSG00000022277	protein_coding	RTF2	39.4815	31.8334	25.8078	27.6247
ENSG00000022355	protein_coding	GABRA1	0	0.0330627	0	0
ENSG00000022556	protein_coding	NLRP2	0.875925	0.238127	4.74563	0.179587
ENSG00000022567	protein_coding	SLC45A4	3.08589	0.769707	0	1.71219
ENSG00000022840	protein_coding	RNF10	44.2693	22.4315	25.3891	25.1726
ENSG00000022976	protein_coding	ZNF839	1.30355	1.99204	0	0
ENSG00000023041	protein_coding	ZDHHC6	18.9041	11.5426	15.9867	19.3593
ENSG00000023171	protein_coding	GRAMD1B	0.650145	0.346495	2.00476	0.15173
ENSG00000023191	protein_coding	RNH1	29.7855	32.4446	16.2512	5.68864
ENSG00000023228	protein_coding	NDUFS1	6.13838	3.27462	0	1.86254
ENSG00000023287	protein_coding	RB1CC1	13.984	3.28376	0	4.02085
ENSG00000023318	protein_coding	ERP44	47.3909	11.8002	24.9244	55.1774
ENSG00000023330	protein_coding	ALAS1	48.1949	16.7955	5.90677	1.78822
ENSG00000023445	protein_coding	BIRC3	196.235	8.46496	27.8949	66.5037
ENSG00000023516	protein_coding	AKAP11	2.87717	2.27989	0	0.114345
ENSG00000023572	protein_coding	GLRX2	7.85596	4.23186	0	3.28617
ENSG00000023608	protein_coding	SNAPC1	31.0117	5.7331	34.6616	0
ENSG00000023697	protein_coding	DERA	7.7896	12.6279	0	3.22426
ENSG00000023734	protein_coding	STRAP	116.705	55.4011	13.5256	23.0329
ENSG00000023839	protein_coding	ABCC2	0.42863	0.19182	0	2.16996
ENSG00000023892	protein_coding	DEF6	7.19386	5.05179	0	10.1108
ENSG00000023902	protein_coding	PLEKHO1	41.6072	8.06314	2.2597	2.73641
ENSG00000023909	protein_coding	GCLM	13.1056	5.18194	13.8035	5.01465
ENSG00000024048	protein_coding	UBR2	9.47654	3.93648	0	3.3345
ENSG00000024422	protein_coding	EHD2	39.4722	56.8509	15.5875	10.0278
ENSG00000024526	protein_coding	DEPDC1	0.02626	0.037722	0	0
ENSG00000024862	protein_coding	CCDC28A	13.3743	19.3597	19.88	13.5416
ENSG00000025039	protein_coding	RRAGD	7.9827	6.75344	5.88011	7.3431
ENSG00000025156	protein_coding	HSF2	9.94502	3.13793	0	2.10184
ENSG00000025293	protein_coding	PHF20	10.7841	5.53983	1.78925	3.25006
ENSG00000025423	protein_coding	HSD17B6	4.95869	2.98973	0	0
ENSG00000025434	protein_coding	NR1H3	12.8458	7.60134	0	2.25046
ENSG00000025708	protein_coding	TYMP	46.7126	15.4505	12.483	7.87312
ENSG00000025770	protein_coding	NCAPH2	13.1546	13.6353	0	0
ENSG00000025772	protein_coding	TOMM34	102.626	14.6461	0	3.44773
ENSG00000025796	protein_coding	SEC63	19.9248	8.26819	0	5.00601
ENSG00000025800	protein_coding	KPNA6	17.513	9.36298	6.02638	5.32125
ENSG00000026025	protein_coding	VIM	733	598.868	101.292	176.543
ENSG00000026036	protein_coding	RTEL1-TNFRSF6B	1.23899	0.563328	0	0
ENSG00000026103	protein_coding	FAS	27.7484	5.40007	18.7983	39.024
ENSG00000026297	protein_coding	RNASET2	8.20869	7.17552	1.95991	2.81838
ENSG00000026508	protein_coding	CD44	297.695	31.4453	106.312	145.059
ENSG00000026559	protein_coding	KCNG1	0.849397	0.092539	0	0
ENSG00000026652	protein_coding	AGPAT4	2.27342	1.56646	0	0.397716
ENSG00000026751	protein_coding	SLAMF7	21.5893	2.52295	89.8836	85.1529
ENSG00000026950	protein_coding	BTN3A1	26.5815	10.4741	0	9.41534
ENSG00000027001	protein_coding	MIPEP	3.52361	2.77731	4.42136	0
ENSG00000027075	protein_coding	PRKCH	17.4997	16.7663	13.5715	9.11606
ENSG00000027644	protein_coding	INSRR	0.0596303	0	0	0
ENSG00000027697	protein_coding	IFNGR1	103.233	53.7068	45.7112	33.5587
ENSG00000027847	protein_coding	B4GALT7	6.86519	4.59985	0	0.464834
ENSG00000027869	protein_coding	SH2D2A	14.7509	2.10564	0	0.902651
ENSG00000028116	protein_coding	VRK2	7.49361	4.28896	4.2423	6.42158
ENSG00000028137	protein_coding	TNFRSF1B	94.4267	40.3803	31.7196	12.0035
ENSG00000028203	protein_coding	VEZT	10.9125	5.23367	0	1.42266
ENSG00000028277	protein_coding	POU2F2	1.63493	0.877635	0	2.12449
ENSG00000028310	protein_coding	BRD9	8.25336	7.22427	0	0.356183
ENSG00000028528	protein_coding	SNX1	22.0571	13.0079	9.18147	8.91789
ENSG00000028839	protein_coding	TBPL1	9.59954	5.07165	5.94545	12.8245
ENSG00000029153	protein_coding	ARNTL2	13.2622	1.35546	4.2903	7.95543
ENSG00000029363	protein_coding	BCLAF1	26.2491	10.7173	0	12.0116
ENSG00000029364	protein_coding	SLC39A9	12.4674	6.32594	4.19713	4.28842
ENSG00000029534	protein_coding	ANK1	0.33984	0.1908	0	0.210008
ENSG00000029559	protein_coding	IBSP	0.0328542	0	0	0
ENSG00000029639	protein_coding	TFB1M	2.94163	1.35436	0	0
ENSG00000029725	protein_coding	RABEP1	15.5134	5.93926	0	1.12425
ENSG00000029993	protein_coding	HMGB3	7.39412	3.78392	0	2.31728
ENSG00000030066	protein_coding	NUP160	8.55702	2.60989	1.74668	2.77616
ENSG00000030110	protein_coding	BAK1	21.6344	14.3725	20.3159	1.53761
ENSG00000030304	protein_coding	MUSK	0.0394243	0.0849485	0	0
ENSG00000030419	protein_coding	IKZF2	0.468663	0.245637	0	0
ENSG00000030582	protein_coding	GRN	66.8286	89.3623	140.274	82.3595
ENSG00000031003	protein_coding	FAM13B	7.74283	4.26906	0	0
ENSG00000031081	protein_coding	ARHGAP31	23.0502	11.6059	15.9799	14.6342
ENSG00000031691	protein_coding	CENPQ	1.00925	2.17466	0	0
ENSG00000031698	protein_coding	SARS1	99.1298	47.7072	3.89181	7.9529
ENSG00000031823	protein_coding	RANBP3	9.38493	7.16443	0	0.761404
ENSG00000032219	protein_coding	ARID4A	3.43421	1.50238	0	0
ENSG00000032389	protein_coding	EIPR1	3.32897	3.0466	0	0
ENSG00000032444	protein_coding	PNPLA6	7.8975	7.31293	0	1.10654
ENSG00000032742	protein_coding	IFT88	2.20723	1.45777	4.90249	0.185523
ENSG00000033011	protein_coding	ALG1	3.4733	3.90098	0	3.23709
ENSG00000033030	protein_coding	ZCCHC8	8.15546	2.10507	0	0.745466
ENSG00000033050	protein_coding	ABCF2	31.3822	15.0417	13.2358	4.50787
ENSG00000033100	protein_coding	CHPF2	9.746	7.1368	0	1.07846
ENSG00000033122	protein_coding	LRRC7	0.0104834	0.0225888	0	0
ENSG00000033170	protein_coding	FUT8	2.92624	1.97138	0	0.162519
ENSG00000033178	protein_coding	UBA6	9.80771	2.47933	0	6.85724
ENSG00000033327	protein_coding	GAB2	10.4503	8.26741	8.84403	2.5101
ENSG00000033627	protein_coding	ATP6V0A1	16.7658	5.21454	0	0.517449
ENSG00000033800	protein_coding	PIAS1	8.88183	3.47727	1.39009	2.63022
ENSG00000033867	protein_coding	SLC4A7	15.2792	2.85452	0	0.943203
ENSG00000034053	protein_coding	APBA2	1.1812	1.56439	0	0
ENSG00000034152	protein_coding	MAP2K3	114.434	38.5688	11.9043	11.7127
ENSG00000034239	protein_coding	EFCAB1	0.736758	0.631179	0	2.53152
ENSG00000034510	protein_coding	TMSB10	3632.26	6690.86	12835	8423.05
ENSG00000034533	protein_coding	ASTE1	3.81527	2.04709	0	1.32329
ENSG00000034677	protein_coding	RNF19A	28.5863	10.1708	7.6792	14.3363
ENSG00000034693	protein_coding	PEX3	6.42799	3.30525	0	0.801223
ENSG00000034713	protein_coding	GABARAPL2	73.2614	48.2601	44.7894	62.9013
ENSG00000034971	protein_coding	MYOC	0.368438	6.35106	0	0
ENSG00000035115	protein_coding	SH3YL1	3.03151	2.62083	2.69126	1.73135
ENSG00000035141	protein_coding	FAM136A	13.6149	7.36114	0	7.34757
ENSG00000035403	protein_coding	VCL	30.3499	12.9498	7.49578	16.6792
ENSG00000035499	protein_coding	DEPDC1B	0.108628	0.102402	0	0
ENSG00000035664	protein_coding	DAPK2	2.78672	1.46843	0	0.249867
ENSG00000035681	protein_coding	NSMAF	15.1353	4.61123	4.85561	17.2724
ENSG00000035687	protein_coding	ADSS2	25.4718	11.4721	21.7663	4.2832
ENSG00000035720	protein_coding	STAP1	1.08604	0.684912	92.1347	95.8818
ENSG00000035862	protein_coding	TIMP2	19.4406	58.3859	13.2963	15.4975
ENSG00000035928	protein_coding	RFC1	8.61455	4.03557	0	0.168735
ENSG00000036054	protein_coding	TBC1D23	16.1549	4.31351	2.89404	15.1135
ENSG00000036257	protein_coding	CUL3	14.9806	5.38145	9.11404	4.23732
ENSG00000036448	protein_coding	MYOM2	4.76073	1.72809	0	0
ENSG00000036473	protein_coding	OTC	0	0.363906	0	0
ENSG00000036530	protein_coding	CYP46A1	0.033135	0.148743	0	0.363453
ENSG00000036549	protein_coding	AC118549.1	5.63955	2.2993	0	1.25858
ENSG00000036565	protein_coding	SLC18A1	0	0.213597	0	0
ENSG00000036672	protein_coding	USP2	1.02834	3.50832	0	0
ENSG00000036828	protein_coding	CASR	0.004305	0.0231894	0	0
ENSG00000037042	protein_coding	TUBG2	6.05056	11.1435	5.36325	3.65326
ENSG00000037241	protein_coding	RPL26L1	27.1717	14.9239	0	8.76595
ENSG00000037280	protein_coding	FLT4	8.12675	4.72367	0	0.512305
ENSG00000037474	protein_coding	NSUN2	40.1441	14.6323	0	5.97133
ENSG00000037637	protein_coding	FBXO42	7.61799	2.49063	0	1.1326
ENSG00000037749	protein_coding	MFAP3	2.5989	0.707131	0	1.59988
ENSG00000037757	protein_coding	MRI1	1.4314	1.49395	0	1.9626
ENSG00000037897	protein_coding	METTL1	31.3475	13.2974	0	7.56985
ENSG00000037965	protein_coding	HOXC8	0.235199	0.299466	0	0
ENSG00000038002	protein_coding	AGA	3.4916	4.18918	0	0.870426
ENSG00000038210	protein_coding	PI4K2B	5.23107	3.80753	40.6501	20.3056
ENSG00000038219	protein_coding	BOD1L1	4.09214	1.44968	0	1.57244
ENSG00000038274	protein_coding	MAT2B	21.3159	11.8186	8.75145	15.4549
ENSG00000038295	protein_coding	TLL1	3.71736	0.844954	0	0
ENSG00000038358	protein_coding	EDC4	14.6959	8.9048	0	0
ENSG00000038382	protein_coding	TRIO	18.2904	2.66542	0	0.634787
ENSG00000038427	protein_coding	VCAN	8.99939	2.07871	4.08218	13.0536
ENSG00000038532	protein_coding	CLEC16A	3.93282	1.49387	0	1.08638
ENSG00000038945	protein_coding	MSR1	6.71464	6.37884	5.75252	20.8982
ENSG00000039068	protein_coding	CDH1	36.5051	1.05827	14.7268	6.13028
ENSG00000039123	protein_coding	MTREX	24.4515	4.62299	0	5.00149
ENSG00000039139	protein_coding	DNAH5	0.479938	0.131801	0	0.344076
ENSG00000039319	protein_coding	ZFYVE16	5.08789	1.42699	2.90114	0.951484
ENSG00000039523	protein_coding	RIPOR1	43.8843	23.2507	11.1306	9.09814
ENSG00000039537	protein_coding	C6	0.196293	0.140986	0	6.69855
ENSG00000039560	protein_coding	RAI14	43.881	12.8086	9.87968	13.7585
ENSG00000039600	protein_coding	SOX30	0.0296243	0	0	0
ENSG00000039650	protein_coding	PNKP	4.70745	6.00265	0	2.24501
ENSG00000039987	protein_coding	BEST2	0.0585936	0	0	0
ENSG00000040199	protein_coding	PHLPP2	4.06636	0.77101	0	0
ENSG00000040275	protein_coding	SPDL1	2.79232	0.839537	3.13708	0.23743
ENSG00000040341	protein_coding	STAU2	2.46176	2.72053	3.34216	5.05904
ENSG00000040487	protein_coding	SLC66A1	4.67541	4.02139	0	0.422089
ENSG00000040531	protein_coding	CTNS	10.0369	4.15775	0	2.00779
ENSG00000040608	protein_coding	RTN4R	0.446369	0.195923	0	0
ENSG00000040633	protein_coding	PHF23	42.6976	12.8753	10.962	1.24449
ENSG00000040731	protein_coding	CDH10	0	0.973598	0	0
ENSG00000040933	protein_coding	INPP4A	2.9941	1.8282	0	2.49323
ENSG00000041353	protein_coding	RAB27B	1.10525	0.591487	0	0.31695
ENSG00000041357	protein_coding	PSMA4	30.059	11.9571	47.119	89.3173
ENSG00000041515	protein_coding	MYO16	0.0293101	0.151573	0	0
ENSG00000041802	protein_coding	LSG1	21.0873	10.2402	15.6005	5.66747
ENSG00000041880	protein_coding	PARP3	4.76554	6.99774	0	0
ENSG00000041982	protein_coding	TNC	164.293	18.3108	20.2028	31.2867
ENSG00000041988	protein_coding	THAP3	12.3742	8.13561	0	1.94895
ENSG00000042062	protein_coding	RIPOR3	5.25119	0.88744	0	0
ENSG00000042088	protein_coding	TDP1	5.33986	1.02891	0	2.18621
ENSG00000042286	protein_coding	AIFM2	17.3808	3.10103	2.91715	0.662354
ENSG00000042304	protein_coding	C2orf83	0.0406446	0.175156	0	0
ENSG00000042317	protein_coding	SPATA7	0.526422	1.34495	0	0
ENSG00000042429	protein_coding	MED17	4.0012	1.36093	0	0.341279
ENSG00000042445	protein_coding	RETSAT	5.73083	9.17189	0	1.96002
ENSG00000042493	protein_coding	CAPG	74.5391	69.0964	86.6945	14.0603
ENSG00000042753	protein_coding	AP2S1	81.9777	77.635	0	38.5894
ENSG00000042781	protein_coding	USH2A	0.007514	0.008095	0	0
ENSG00000042813	protein_coding	ZPBP	0.0196875	0	0	0
ENSG00000042832	protein_coding	TG	0.0928487	0.0350111	0	0.407377
ENSG00000042980	protein_coding	ADAM28	1.63059	0.173283	0	1.09504
ENSG00000043039	protein_coding	BARX2	0.137739	0.26711	0	0
ENSG00000043093	protein_coding	DCUN1D1	5.1325	2.85526	5.40974	1.77423
ENSG00000043143	protein_coding	JADE2	3.33822	5.06212	1.51661	1.4922
ENSG00000043355	protein_coding	ZIC2	0	0.0846165	0	0
ENSG00000043462	protein_coding	LCP2	32.6294	5.95936	271.599	297.896
ENSG00000043514	protein_coding	TRIT1	7.0483	2.22438	0	0
ENSG00000043591	protein_coding	ADRB1	2.27873	6.48565	0	3.35754
ENSG00000044012	protein_coding	GUCA2B	0	0	0	0
ENSG00000044090	protein_coding	CUL7	2.8885	2.69217	0	0.557481
ENSG00000044115	protein_coding	CTNNA1	112.747	43.9431	33.9288	18.6173
ENSG00000044446	protein_coding	PHKA2	3.26512	2.35166	1.75261	0.663233
ENSG00000044459	protein_coding	CNTLN	0.630581	0.961174	1.3539	2.15187
ENSG00000044524	protein_coding	EPHA3	0.0550034	0.490999	0	0
ENSG00000044574	protein_coding	HSPA5	720.206	105.306	68.7662	90.2126
ENSG00000046604	protein_coding	DSG2	4.91536	0.91938	0	2.62091
ENSG00000046647	protein_coding	GEMIN8	6.71579	5.32888	0	1.87084
ENSG00000046651	protein_coding	OFD1	12.241	3.73264	0	3.94265
ENSG00000046653	protein_coding	GPM6B	3.11852	5.37757	0	0
ENSG00000046774	protein_coding	MAGEC2	0	0	0	0
ENSG00000046889	protein_coding	PREX2	1.20552	2.49659	0	0
ENSG00000047056	protein_coding	WDR37	9.37467	4.94834	0	0
ENSG00000047188	protein_coding	YTHDC2	4.16115	2.65377	0	1.04926
ENSG00000047230	protein_coding	CTPS2	1.96216	3.10047	0	0
ENSG00000047249	protein_coding	ATP6V1H	17.2535	6.21792	0	1.99913
ENSG00000047315	protein_coding	POLR2B	28.3532	7.48543	2.54279	3.07922
ENSG00000047346	protein_coding	FAM214A	2.79108	2.40107	0	1.03779
ENSG00000047365	protein_coding	ARAP2	15.2415	1.6443	0	2.73694
ENSG00000047410	protein_coding	TPR	14.8762	5.63539	4.85168	2.3868
ENSG00000047457	protein_coding	CP	2.72575	1.25968	2.11815	3.36656
ENSG00000047578	protein_coding	KIAA0556	2.46672	1.25764	0	0
ENSG00000047579	protein_coding	DTNBP1	13.4618	10.4715	0	7.05795
ENSG00000047597	protein_coding	XK	0.149825	0.258265	0	0
ENSG00000047617	protein_coding	ANO2	0.826213	2.49236	0	0
ENSG00000047621	protein_coding	C12orf4	4.92486	4.9559	3.03722	6.20655
ENSG00000047634	protein_coding	SCML1	11.3193	5.00359	0	0.824981
ENSG00000047644	protein_coding	WWC3	11.1873	11.7163	2.10565	10.8369
ENSG00000047648	protein_coding	ARHGAP6	1.67364	3.23059	0	0.382457
ENSG00000047662	protein_coding	FAM184B	0.0153557	0	0	0
ENSG00000047849	protein_coding	MAP4	18.1534	22.1064	1.00245	1.89676
ENSG00000047932	protein_coding	GOPC	10.7201	6.12358	0	11.5137
ENSG00000047936	protein_coding	ROS1	2.75633	0.212618	0	0
ENSG00000048028	protein_coding	USP28	6.22613	1.4506	5.23853	2.18063
ENSG00000048052	protein_coding	HDAC9	0.319408	0.79081	0	0.943259
ENSG00000048140	protein_coding	TSPAN17	12.1593	6.60872	0	2.17398
ENSG00000048162	protein_coding	NOP16	69.502	28.9866	5.23395	4.35745
ENSG00000048342	protein_coding	CC2D2A	0.416422	1.81203	0	2.13553
ENSG00000048392	protein_coding	RRM2B	8.17709	4.37902	8.33588	5.25751
ENSG00000048405	protein_coding	ZNF800	9.42062	3.90214	0	1.17424
ENSG00000048462	protein_coding	TNFRSF17	0.203663	1.42623	0	4.4679
ENSG00000048471	protein_coding	SNX29	1.43161	1.94643	0	0.301017
ENSG00000048540	protein_coding	LMO3	3.08982	2.55509	0	0.453401
ENSG00000048544	protein_coding	MRPS10	25.4214	15.2981	7.13313	28.0733
ENSG00000048545	protein_coding	GUCA1A	0	0	0	0
ENSG00000048649	protein_coding	RSF1	6.35981	1.77928	1.90338	0.288114
ENSG00000048707	protein_coding	VPS13D	5.65121	2.59783	0	0.10918
ENSG00000048740	protein_coding	CELF2	13.2612	6.44619	0	7.84874
ENSG00000048828	protein_coding	FAM120A	25.8683	14.3228	2.06729	26.4422
ENSG00000048991	protein_coding	R3HDM1	2.04153	2.53785	1.89663	1.72256
ENSG00000049089	protein_coding	COL9A2	0.613044	0.67368	7.10774	2.68975
ENSG00000049130	protein_coding	KITLG	43.0927	6.13755	7.24234	6.02951
ENSG00000049167	protein_coding	ERCC8	1.30906	1.69649	0	1.4567
ENSG00000049192	protein_coding	ADAMTS6	0.0241352	0.624058	0	0
ENSG00000049239	protein_coding	H6PD	4.31911	8.32686	0	2.55427
ENSG00000049245	protein_coding	VAMP3	72.9717	87.4789	21.924	26.1343
ENSG00000049246	protein_coding	PER3	6.25975	2.50924	0	0
ENSG00000049247	protein_coding	UTS2	0.375117	0.777187	0	0
ENSG00000049249	protein_coding	TNFRSF9	3.23253	0.334189	0	0
ENSG00000049283	protein_coding	EPN3	0.0114767	0	0	0
ENSG00000049323	protein_coding	LTBP1	20.7197	8.03189	2.03859	2.16007
ENSG00000049449	protein_coding	RCN1	142.724	39.8854	22.4293	53.352
ENSG00000049540	protein_coding	ELN	1.19285	8.64697	0	1.9063
ENSG00000049541	protein_coding	RFC2	16.8058	14.0516	13.55	8.71705
ENSG00000049618	protein_coding	ARID1B	1.44245	0.892298	1.67643	0.304514
ENSG00000049656	protein_coding	CLPTM1L	26.1831	15.7962	0	5.02033
ENSG00000049759	protein_coding	NEDD4L	22.9087	2.63263	0	2.64168
ENSG00000049768	protein_coding	FOXP3	1.30622	0	0	1.10214
ENSG00000049769	protein_coding	PPP1R3F	0.920742	1.10643	0	0
ENSG00000049860	protein_coding	HEXB	39.8391	19.3068	0	7.6863
ENSG00000049883	protein_coding	PTCD2	0.546016	0.27115	0	0.0935807
ENSG00000050030	protein_coding	NEXMIF	0.121917	0.0562922	0	0
ENSG00000050130	protein_coding	JKAMP	8.9578	4.85099	0	2.34565
ENSG00000050165	protein_coding	DKK3	34.9544	15.3698	0	3.31833
ENSG00000050327	protein_coding	ARHGEF5	6.91963	2.60301	0	0
ENSG00000050344	protein_coding	NFE2L3	7.18206	1.8115	0	9.2216
ENSG00000050393	protein_coding	MCUR1	4.65005	3.97107	2.4731	1.49741
ENSG00000050405	protein_coding	LIMA1	23.455	16.9845	0	7.8968
ENSG00000050426	protein_coding	LETMD1	8.94997	10.0979	0	4.12265
ENSG00000050438	protein_coding	SLC4A8	0.224945	0.0901033	0	0
ENSG00000050555	protein_coding	LAMC3	5.34569	14.413	0	0.755618
ENSG00000050628	protein_coding	PTGER3	0.283748	0.253788	0	0
ENSG00000050730	protein_coding	TNIP3	8.73963	1.36632	15.9825	41.43
ENSG00000050748	protein_coding	MAPK9	4.38021	4.13463	0	0.379809
ENSG00000050767	protein_coding	COL23A1	0.200753	0.957828	0	0
ENSG00000050820	protein_coding	BCAR1	15.8595	7.2873	0	0.739469
ENSG00000051009	protein_coding	FAM160A2	15.0914	12.6732	0	1.19693
ENSG00000051108	protein_coding	HERPUD1	77.7644	35.3732	0	4.47938
ENSG00000051128	protein_coding	HOMER3	13.9846	8.24914	4.37743	0.662612
ENSG00000051180	protein_coding	RAD51	0.402176	0.306913	0	0
ENSG00000051341	protein_coding	POLQ	0.0550838	0.011869	0	0
ENSG00000051382	protein_coding	PIK3CB	4.20502	2.42138	0	1.15672
ENSG00000051523	protein_coding	CYBA	85.1212	68.0524	151.96	67.6125
ENSG00000051596	protein_coding	THOC3	7.88739	6.62714	0	1.31333
ENSG00000051620	protein_coding	HEBP2	9.55513	6.38421	5.78809	4.81879
ENSG00000051825	protein_coding	MPHOSPH9	1.03821	0.491718	0	0.880225
ENSG00000052126	protein_coding	PLEKHA5	1.00413	1.15275	0	0
ENSG00000052344	protein_coding	PRSS8	56.3351	2.3394	5.03515	0.762171
ENSG00000052723	protein_coding	SIKE1	6.1991	3.1079	0	4.03942
ENSG00000052749	protein_coding	RRP12	22.1709	10.9867	3.51262	0.265853
ENSG00000052795	protein_coding	FNIP2	22.7454	4.90811	4.09241	9.29202
ENSG00000052802	protein_coding	MSMO1	22.0889	11.4596	68.2799	50.0876
ENSG00000052841	protein_coding	TTC17	10.4768	5.39722	6.63047	3.81389
ENSG00000052850	protein_coding	ALX4	0.0180477	0.0291659	0	0
ENSG00000053108	protein_coding	FSTL4	0.931788	0.0995577	0	0.675744
ENSG00000053254	protein_coding	FOXN3	8.13158	8.52853	0	1.02758
ENSG00000053328	protein_coding	METTL24	0.116527	0.87879	0	0
ENSG00000053371	protein_coding	AKR7A2	10.7944	29.4801	0	3.18285
ENSG00000053372	protein_coding	MRTO4	54.1867	24.7238	5.86055	9.75824
ENSG00000053438	protein_coding	NNAT	0.583291	0.209472	0	0
ENSG00000053501	protein_coding	USE1	17.0706	12.0929	0	1.86545
ENSG00000053524	protein_coding	MCF2L2	0.120606	0.0893311	0	0
ENSG00000053702	protein_coding	NRIP2	0.348938	2.49303	0	0
ENSG00000053747	protein_coding	LAMA3	4.02085	0.872453	1.02055	1.46756
ENSG00000053770	protein_coding	AP5M1	2.6993	1.56953	0	1.13208
ENSG00000053900	protein_coding	ANAPC4	4.07561	3.75196	0	1.059
ENSG00000053918	protein_coding	KCNQ1	2.37352	2.7083	0	0
ENSG00000054116	protein_coding	TRAPPC3	39.2542	19.0696	4.24711	8.67896
ENSG00000054118	protein_coding	THRAP3	41.6393	21.3392	15.8682	13.6912
ENSG00000054148	protein_coding	PHPT1	34.624	49.6332	0	4.92314
ENSG00000054179	protein_coding	ENTPD2	0.0195756	0.06327	0	0
ENSG00000054219	protein_coding	LY75	1.43799	0.379405	3.40251	0.772559
ENSG00000054267	protein_coding	ARID4B	10.8418	3.52982	0	4.60741
ENSG00000054277	protein_coding	OPN3	5.85628	5.95051	0	8.52428
ENSG00000054282	protein_coding	SDCCAG8	11.2081	6.61309	2.81518	1.2784
ENSG00000054356	protein_coding	PTPRN	0.0502475	0.0270674	0	0
ENSG00000054392	protein_coding	HHAT	0.225539	0.955192	0	0
ENSG00000054523	protein_coding	KIF1B	4.36593	2.56394	0	2.55921
ENSG00000054598	protein_coding	FOXC1	2.68583	6.87758	0	9.39319
ENSG00000054611	protein_coding	TBC1D22A	9.4122	10.2137	0	1.27985
ENSG00000054654	protein_coding	SYNE2	4.4725	2.30263	0	0.70033
ENSG00000054690	protein_coding	PLEKHH1	0.443868	0.149118	0	0
ENSG00000054793	protein_coding	ATP9A	3.02152	3.02079	0	2.52783
ENSG00000054796	protein_coding	SPO11	0	0	0	0
ENSG00000054803	protein_coding	CBLN4	0.163854	0.0706121	0	0
ENSG00000054938	protein_coding	CHRDL2	0.527511	0.31968	0	0
ENSG00000054965	protein_coding	FAM168A	5.57618	3.42382	0	1.14997
ENSG00000054967	protein_coding	RELT	20.164	3.51866	2.42114	6.23029
ENSG00000054983	protein_coding	GALC	10.1119	2.23173	0	15.3161
ENSG00000055044	protein_coding	NOP58	59.0195	24.3016	0	11.4273
ENSG00000055070	protein_coding	SZRD1	56.5838	36.14	22.1124	20.5611
ENSG00000055118	protein_coding	KCNH2	0.516351	0.43161	0	0
ENSG00000055130	protein_coding	CUL1	60.7285	17.4998	0	1.91139
ENSG00000055147	protein_coding	FAM114A2	3.93757	2.96185	0	2.25946
ENSG00000055163	protein_coding	CYFIP2	4.21884	2.1798	4.28069	0.431979
ENSG00000055208	protein_coding	TAB2	49.3234	9.2514	15.1769	17.8043
ENSG00000055211	protein_coding	GINM1	37.0945	30.8083	13.3152	19.6513
ENSG00000055332	protein_coding	EIF2AK2	7.90117	3.38633	112.838	142.336
ENSG00000055483	protein_coding	USP36	25.9042	11.9314	1.62204	0.859351
ENSG00000055609	protein_coding	KMT2C	7.92126	1.81311	0	2.02915
ENSG00000055732	protein_coding	MCOLN3	0.600744	0.899382	0	0
ENSG00000055813	protein_coding	CCDC85A	0.339171	1.93532	0	5.51157
ENSG00000055917	protein_coding	PUM2	29.0244	11.5616	2.14668	6.17394
ENSG00000055950	protein_coding	MRPL43	16.0694	15.3803	8.38487	18.4037
ENSG00000055955	protein_coding	ITIH4	1.08706	4.2305	0	0
ENSG00000055957	protein_coding	ITIH1	0.0227613	0.183916	0	0
ENSG00000056050	protein_coding	HPF1	10.7212	11.1982	0	0
ENSG00000056097	protein_coding	ZFR	23.3554	6.91551	0	5.52549
ENSG00000056277	protein_coding	ZNF280C	1.04741	0.72028	0	0
ENSG00000056291	protein_coding	NPFFR2	0.0438148	0.0708067	0	0
ENSG00000056487	protein_coding	PHF21B	0.0430161	0.046344	0	0
ENSG00000056558	protein_coding	TRAF1	444.865	4.42834	13.3866	22.2896
ENSG00000056586	protein_coding	RC3H2	9.83267	3.69322	0	1.07853
ENSG00000056736	protein_coding	IL17RB	1.29029	0.365819	0	0
ENSG00000056972	protein_coding	TRAF3IP2	27.478	4.98701	0	6.04963
ENSG00000056998	protein_coding	GYG2	0.0856331	0.276774	0	0
ENSG00000057019	protein_coding	DCBLD2	11.6966	1.69303	1.32798	3.41727
ENSG00000057149	protein_coding	SERPINB3	0.544952	0	0	0
ENSG00000057252	protein_coding	SOAT1	14.6075	4.55436	10.6921	10.6818
ENSG00000057294	protein_coding	PKP2	0.454939	0.561283	0	0
ENSG00000057468	protein_coding	MSH4	0.0790208	0.119188	0	0
ENSG00000057593	protein_coding	F7	0.0408534	0.381454	0	0
ENSG00000057608	protein_coding	GDI2	125.783	53.9724	42.056	79.8646
ENSG00000057657	protein_coding	PRDM1	11.2164	12.0099	4.43839	19.9872
ENSG00000057663	protein_coding	ATG5	12.8765	6.13389	0	3.60869
ENSG00000057704	protein_coding	TMCC3	3.22204	5.42925	0	2.26328
ENSG00000057757	protein_coding	PITHD1	50.324	30.0808	0	8.86949
ENSG00000057935	protein_coding	MTA3	2.08086	2.65758	0	0
ENSG00000058056	protein_coding	USP13	3.43474	2.59442	0	0.834136
ENSG00000058063	protein_coding	ATP11B	8.43232	2.32116	0	8.88522
ENSG00000058085	protein_coding	LAMC2	129.642	1.60371	28.7643	49.5693
ENSG00000058091	protein_coding	CDK14	5.14071	2.88029	0	2.1004
ENSG00000058262	protein_coding	SEC61A1	141.584	42.0102	29.0552	11.7282
ENSG00000058272	protein_coding	PPP1R12A	8.62053	8.60225	0	0.764484
ENSG00000058335	protein_coding	RASGRF1	0.636844	1.16062	0	1.56683
ENSG00000058404	protein_coding	CAMK2B	0.0316703	0.0545926	0	0
ENSG00000058453	protein_coding	CROCC	1.11803	2.06399	0	0
ENSG00000058600	protein_coding	POLR3E	7.36568	3.32798	0	2.74887
ENSG00000058668	protein_coding	ATP2B4	58.5748	13.517	3.0819	11.7793
ENSG00000058673	protein_coding	ZC3H11A	38.2448	9.60154	3.51138	3.63205
ENSG00000058729	protein_coding	RIOK2	8.42653	3.28649	0	0
ENSG00000058799	protein_coding	YIPF1	17.1335	9.40722	29.4294	33.9673
ENSG00000058804	protein_coding	NDC1	4.21539	2.31204	0	1.92158
ENSG00000058866	protein_coding	DGKG	0.395543	2.09013	0	0
ENSG00000059122	protein_coding	FLYWCH1	3.03853	4.17963	0	0
ENSG00000059145	protein_coding	UNKL	1.75162	0.854407	0	0.30257
ENSG00000059377	protein_coding	TBXAS1	18.3034	3.60471	0	1.80789
ENSG00000059378	protein_coding	PARP12	25.7179	9.34697	21.7489	30.4523
ENSG00000059573	protein_coding	ALDH18A1	22.5059	5.88029	0	3.92085
ENSG00000059588	protein_coding	TARBP1	2.33315	2.122	0	0.724984
ENSG00000059691	protein_coding	GATB	0.625032	0.910494	0	0.289685
ENSG00000059728	protein_coding	MXD1	14.0042	8.23198	202.841	277.943
ENSG00000059758	protein_coding	CDK17	43.7522	9.81483	0	5.2593
ENSG00000059769	protein_coding	DNAJC25	14.9045	5.49507	0	2.1769
ENSG00000059804	protein_coding	SLC2A3	242.709	123.874	78.9567	135.764
ENSG00000059915	protein_coding	PSD	0.242019	0.391112	0	0
ENSG00000060069	protein_coding	CTDP1	6.02174	2.91341	0	0
ENSG00000060138	protein_coding	YBX3	105.14	80.6974	46.9143	93.1076
ENSG00000060140	protein_coding	STYK1	0.495764	0.113298	0	0
ENSG00000060237	protein_coding	WNK1	14.3463	9.12348	0	8.74889
ENSG00000060339	protein_coding	CCAR1	12.47	6.73572	0	1.12269
ENSG00000060491	protein_coding	OGFR	14.8049	4.8786	3.18579	5.54568
ENSG00000060558	protein_coding	GNA15	17.6645	9.48522	5.44118	3.70635
ENSG00000060566	protein_coding	CREB3L3	0.0585494	0	0	0
ENSG00000060642	protein_coding	PIGV	4.3703	2.37066	4.4292	6.36927
ENSG00000060656	protein_coding	PTPRU	2.32025	1.81648	0	0.678677
ENSG00000060688	protein_coding	SNRNP40	21.326	7.57743	19.2688	7.00013
ENSG00000060709	protein_coding	RIMBP2	0.0160579	0.0173001	0	0
ENSG00000060718	protein_coding	COL11A1	0.0227388	0.0551203	0	0
ENSG00000060749	protein_coding	QSER1	4.89342	1.13409	1.3744	0
ENSG00000060762	protein_coding	MPC1	26.8426	27.9108	0	32.9999
ENSG00000060971	protein_coding	ACAA1	7.54176	11.0164	0	2.23364
ENSG00000060982	protein_coding	BCAT1	3.94784	3.32651	0	0
ENSG00000061273	protein_coding	HDAC7	14.6585	12.1697	0	1.02776
ENSG00000061337	protein_coding	LZTS1	0.787964	8.4502	0	0
ENSG00000061455	protein_coding	PRDM6	0.582305	0.88674	0	0
ENSG00000061492	protein_coding	WNT8A	0	0	0	0
ENSG00000061656	protein_coding	SPAG4	5.01829	3.6992	0	0
ENSG00000061676	protein_coding	NCKAP1	10.4048	3.40939	0	5.48741
ENSG00000061794	protein_coding	MRPS35	33.8997	22.2422	0	20.5599
ENSG00000061918	protein_coding	GUCY1B1	4.24601	7.7524	0	5.22322
ENSG00000061936	protein_coding	SFSWAP	9.21451	6.32588	2.9496	1.78593
ENSG00000061938	protein_coding	TNK2	1.17015	1.51668	0	0.885189
ENSG00000061987	protein_coding	MON2	4.74391	2.08956	0	0.283185
ENSG00000062038	protein_coding	CDH3	4.89068	0.375705	0	2.98546
ENSG00000062096	protein_coding	ARSF	0	0.0252506	0	0
ENSG00000062194	protein_coding	GPBP1	57.8521	13.4463	37.0323	49.5744
ENSG00000062282	protein_coding	DGAT2	3.56343	1.31727	0	1.00406
ENSG00000062370	protein_coding	ZNF112	1.42361	1.04179	0	0.294628
ENSG00000062485	protein_coding	CS	47.1341	21.7022	21.0617	35.4235
ENSG00000062524	protein_coding	LTK	0.784594	5.61402	0	0
ENSG00000062582	protein_coding	MRPS24	50.173	19.1572	5.7459	11.3069
ENSG00000062598	protein_coding	ELMO2	13.0276	5.09767	0	9.28019
ENSG00000062650	protein_coding	WAPL	18.1327	5.76482	0	1.41618
ENSG00000062716	protein_coding	VMP1	122.895	27.6439	32.7828	70.1344
ENSG00000062725	protein_coding	APPBP2	6.79307	3.52982	0	3.20975
ENSG00000062822	protein_coding	POLD1	3.03751	2.41488	0	0
ENSG00000063015	protein_coding	SEZ6	0.0624904	0.0112208	0	0
ENSG00000063046	protein_coding	EIF4B	91.0069	83.9694	48.7457	89.0972
ENSG00000063127	protein_coding	SLC6A16	3.57106	3.61463	0	0.63178
ENSG00000063169	protein_coding	BICRA	0.530082	0.415339	0	1.20818
ENSG00000063176	protein_coding	SPHK2	0.722431	0.806117	0	0
ENSG00000063177	protein_coding	RPL18	490.507	326.675	73.791	63.7852
ENSG00000063180	protein_coding	CA11	2.57601	10.8723	0	0
ENSG00000063241	protein_coding	ISOC2	8.49993	9.48591	3.39827	0
ENSG00000063244	protein_coding	U2AF2	50.9763	27.4803	61.884	58.9595
ENSG00000063245	protein_coding	EPN1	1.67806	1.52658	2.55102	3.2179
ENSG00000063322	protein_coding	MED29	10.8905	13.7055	3.90195	4.72511
ENSG00000063438	protein_coding	AHRR	0	0	0	0
ENSG00000063515	protein_coding	GSC2	0	0	0	0
ENSG00000063587	protein_coding	ZNF275	4.94784	2.38511	0	0.974114
ENSG00000063601	protein_coding	MTMR1	7.87281	2.89474	0	1.43329
ENSG00000063660	protein_coding	GPC1	1.67986	3.7477	2.29678	1.39065
ENSG00000063761	protein_coding	ADCK1	0.82992	1.09399	0	0
ENSG00000063854	protein_coding	HAGH	6.63807	10.3937	0	1.55332
ENSG00000063978	protein_coding	RNF4	22.5723	14.6426	0	4.7629
ENSG00000064012	protein_coding	CASP8	4.07415	2.31382	0	3.60014
ENSG00000064042	protein_coding	LIMCH1	7.43174	12.8097	1.37908	3.8619
ENSG00000064102	protein_coding	INTS13	9.32564	3.67665	0	0.741242
ENSG00000064115	protein_coding	TM7SF3	3.35204	6.27183	0	0.617949
ENSG00000064195	protein_coding	DLX3	0.152279	0.0410148	0	0
ENSG00000064199	protein_coding	SPA17	0.814165	1.00551	0	0
ENSG00000064201	protein_coding	TSPAN32	0.24525	0.748632	0	0
ENSG00000064205	protein_coding	CCN5	2.79097	35.8367	0	0
ENSG00000064218	protein_coding	DMRT3	0.0191619	0	0	0
ENSG00000064225	protein_coding	ST3GAL6	4.2491	1.3459	0	7.03172
ENSG00000064270	protein_coding	ATP2C2	5.88374	0.89011	0	0
ENSG00000064300	protein_coding	NGFR	0.648959	2.39329	0	0.547563
ENSG00000064309	protein_coding	CDON	0.180391	0.367683	0	0
ENSG00000064313	protein_coding	TAF2	5.93135	1.91109	11.4768	1.91098
ENSG00000064393	protein_coding	HIPK2	16.6796	5.05026	0	1.01602
ENSG00000064419	protein_coding	TNPO3	16.8987	8.77554	0	7.75863
ENSG00000064489	protein_coding	BORCS8-MEF2B	0.2947	1.64522	0	0
ENSG00000064490	protein_coding	RFXANK	13.9781	16.661	0	3.62359
ENSG00000064545	protein_coding	TMEM161A	5.4184	5.32849	0	0.691088
ENSG00000064547	protein_coding	LPAR2	5.45459	1.42235	10.0703	3.81086
ENSG00000064601	protein_coding	CTSA	18.5768	24.9009	7.67396	9.09927
ENSG00000064607	protein_coding	SUGP2	11.3331	7.08792	1.76896	0
ENSG00000064651	protein_coding	SLC12A2	2.6827	1.39024	0	4.57621
ENSG00000064652	protein_coding	SNX24	4.64135	4.67987	0	1.95808
ENSG00000064655	protein_coding	EYA2	0.442805	1.07723	0	0
ENSG00000064666	protein_coding	CNN2	18.315	41.9418	45.2679	63.8502
ENSG00000064687	protein_coding	ABCA7	1.41713	1.03333	7.80918	0.591038
ENSG00000064692	protein_coding	SNCAIP	0.810493	0.589789	0	0.311936
ENSG00000064703	protein_coding	DDX20	6.37551	2.41253	0	1.42097
ENSG00000064726	protein_coding	BTBD1	23.9841	16.0077	0	8.08612
ENSG00000064763	protein_coding	FAR2	4.01135	3.43676	13.8418	14.0381
ENSG00000064787	protein_coding	BCAS1	0.252527	0.204047	0	1.10797
ENSG00000064835	protein_coding	POU1F1	0.066002	0	0	0
ENSG00000064886	protein_coding	CHI3L2	15.496	2.21359	222.761	167.909
ENSG00000064932	protein_coding	SBNO2	14.3155	14.0415	22.662	10.8056
ENSG00000064933	protein_coding	PMS1	2.19833	2.22547	0	0
ENSG00000064961	protein_coding	HMG20B	9.48643	17.9866	11.6512	0.293941
ENSG00000064989	protein_coding	CALCRL	13.0454	12.5692	6.14841	8.84151
ENSG00000064995	protein_coding	TAF11	34.7389	25.7814	0	5.7
ENSG00000064999	protein_coding	ANKS1A	4.89551	9.39536	0	0.93388
ENSG00000065000	protein_coding	AP3D1	15.9425	11.2415	0	3.02749
ENSG00000065029	protein_coding	ZNF76	4.73971	5.82883	0	0.334335
ENSG00000065054	protein_coding	SLC9A3R2	9.28939	61.7585	29.8228	7.41632
ENSG00000065057	protein_coding	NTHL1	2.65842	14.3891	0	0
ENSG00000065060	protein_coding	UHRF1BP1	2.45149	1.02836	0	0.114426
ENSG00000065135	protein_coding	GNAI3	25.3027	8.56342	9.93779	26.7011
ENSG00000065150	protein_coding	IPO5	60.4551	8.14654	7.75019	4.45796
ENSG00000065154	protein_coding	OAT	23.8416	15.4478	0	7.69651
ENSG00000065183	protein_coding	WDR3	10.1086	3.09922	1.45772	5.40607
ENSG00000065243	protein_coding	PKN2	5.44745	3.27753	2.1719	0.657521
ENSG00000065268	protein_coding	WDR18	13.0021	11.9765	0	1.92402
ENSG00000065308	protein_coding	TRAM2	18.8179	4.13217	2.12567	1.28705
ENSG00000065320	protein_coding	NTN1	0.813662	1.18906	0	0
ENSG00000065325	protein_coding	GLP2R	0.009073	1.14366	0	1.39328
ENSG00000065328	protein_coding	MCM10	0.189511	0.21438	0	0
ENSG00000065357	protein_coding	DGKA	5.865	2.60799	1.48342	2.58227
ENSG00000065361	protein_coding	ERBB3	2.37844	0.800763	0	0.501706
ENSG00000065371	protein_coding	ROPN1	0	0	0	0
ENSG00000065413	protein_coding	ANKRD44	1.44651	1.9274	0	0.972324
ENSG00000065427	protein_coding	KARS1	100.461	32.2287	22.1101	24.5432
ENSG00000065457	protein_coding	ADAT1	1.77411	1.46455	0	4.29635
ENSG00000065485	protein_coding	PDIA5	11.6015	8.10454	0	1.67258
ENSG00000065491	protein_coding	TBC1D22B	29.4971	6.20785	0	7.85948
ENSG00000065518	protein_coding	NDUFB4	108.811	65.4071	79.8059	152.815
ENSG00000065526	protein_coding	SPEN	13.8644	5.63146	3.13468	3.63781
ENSG00000065534	protein_coding	MYLK	28.1583	7.51762	0	2.40381
ENSG00000065548	protein_coding	ZC3H15	57.1447	23.0365	4.95029	32.5957
ENSG00000065559	protein_coding	MAP2K4	12.1391	4.35942	0	2.58162
ENSG00000065600	protein_coding	PACC1	5.07219	1.14642	0	7.3922
ENSG00000065609	protein_coding	SNAP91	0.00777	0.0167426	0	0
ENSG00000065613	protein_coding	SLK	20.2078	9.54631	0	1.11877
ENSG00000065615	protein_coding	CYB5R4	3.5291	2.5116	0	3.41733
ENSG00000065618	protein_coding	COL17A1	0.229227	0.231028	0	0
ENSG00000065621	protein_coding	GSTO2	0.734115	1.08259	0	0
ENSG00000065665	protein_coding	SEC61A2	3.65558	1.40758	0	4.6322
ENSG00000065675	protein_coding	PRKCQ	4.43864	1.08145	0	1.03223
ENSG00000065717	protein_coding	TLE2	5.79061	8.57302	0	1.09275
ENSG00000065802	protein_coding	ASB1	10.2564	5.12652	0	0
ENSG00000065809	protein_coding	FAM107B	31.5644	12.7157	0	11.4681
ENSG00000065833	protein_coding	ME1	7.32308	2.86895	0	2.3775
ENSG00000065882	protein_coding	TBC1D1	21.1981	12.7809	9.94769	10.164
ENSG00000065883	protein_coding	CDK13	2.31758	1.32986	0	0.230264
ENSG00000065911	protein_coding	MTHFD2	50.4257	35.1247	21.7455	41.8507
ENSG00000065923	protein_coding	SLC9A7	2.28882	0.329156	0	0
ENSG00000065970	protein_coding	FOXJ2	14.0094	5.72073	0	0.720171
ENSG00000065978	protein_coding	YBX1	299.772	239.996	83.8326	82.1495
ENSG00000065989	protein_coding	PDE4A	4.00475	4.42161	0	2.68259
ENSG00000066027	protein_coding	PPP2R5A	22.7065	24.9292	15.2	10.0661
ENSG00000066032	protein_coding	CTNNA2	0	0.0591136	0	0
ENSG00000066044	protein_coding	ELAVL1	19.1442	9.66081	8.60647	10.7478
ENSG00000066056	protein_coding	TIE1	17.188	20.0041	17.8727	7.9471
ENSG00000066084	protein_coding	DIP2B	8.91699	1.47384	4.34148	1.97151
ENSG00000066117	protein_coding	SMARCD1	14.0504	9.7433	9.16555	0.693696
ENSG00000066135	protein_coding	KDM4A	5.74218	4.52166	0	1.31219
ENSG00000066136	protein_coding	NFYC	13.5713	10.4105	0	4.54249
ENSG00000066185	protein_coding	ZMYND12	0.379126	0.689269	0	6.23785
ENSG00000066230	protein_coding	SLC9A3	0.206575	0.0967634	0	0
ENSG00000066248	protein_coding	NGEF	0.0333632	0.299535	0	0
ENSG00000066279	protein_coding	ASPM	0.118662	0.015341	0	0
ENSG00000066294	protein_coding	CD84	2.1945	0.601595	0	0.122499
ENSG00000066322	protein_coding	ELOVL1	63.1869	23.3731	23.9099	6.33369
ENSG00000066336	protein_coding	SPI1	12.9137	23.7619	318.56	237.267
ENSG00000066379	protein_coding	ZNRD1	32.2012	9.40091	0	6.7925
ENSG00000066382	protein_coding	MPPED2	0.0882657	0.135849	0	0
ENSG00000066405	protein_coding	CLDN18	34.7359	19.1237	4.03219	31.4332
ENSG00000066422	protein_coding	ZBTB11	7.97213	1.68146	0	1.76819
ENSG00000066427	protein_coding	ATXN3	3.14539	2.16694	6.20208	3.87259
ENSG00000066455	protein_coding	GOLGA5	15.6248	9.9716	4.67381	6.36728
ENSG00000066468	protein_coding	FGFR2	2.08682	1.03597	0	0.149608
ENSG00000066557	protein_coding	LRRC40	5.23522	3.52514	0	0
ENSG00000066583	protein_coding	ISOC1	18.8942	6.76618	0	12.2597
ENSG00000066629	protein_coding	EML1	1.1163	3.98187	0	1.26886
ENSG00000066651	protein_coding	TRMT11	4.88617	1.62499	0	0
ENSG00000066654	protein_coding	THUMPD1	8.37081	4.54774	0	1.39515
ENSG00000066697	protein_coding	MSANTD3	56.4456	7.78768	0	6.97037
ENSG00000066735	protein_coding	KIF26A	0.26773	0.824121	0	0
ENSG00000066739	protein_coding	ATG2B	2.98347	2.30428	0	0.556686
ENSG00000066777	protein_coding	ARFGEF1	7.47693	3.25235	1.35451	1.43523
ENSG00000066813	protein_coding	ACSM2B	0	0.0614242	0	0
ENSG00000066827	protein_coding	ZFAT	1.41683	0.569288	0	2.67509
ENSG00000066855	protein_coding	MTFR1	4.80065	1.76812	0	2.69411
ENSG00000066923	protein_coding	STAG3	0.295037	0.350296	0	0
ENSG00000066926	protein_coding	FECH	1.1665	1.47255	0	0.516977
ENSG00000066933	protein_coding	MYO9A	2.3678	1.24672	0	0.278969
ENSG00000067048	protein_coding	DDX3Y	75.6492	20.2269	0	23.5863
ENSG00000067057	protein_coding	PFKP	84.6563	14.9269	5.39415	11.4312
ENSG00000067064	protein_coding	IDI1	26.0717	18.0167	13.7902	20.3523
ENSG00000067066	protein_coding	SP100	31.3427	7.76036	18.017	35.8552
ENSG00000067082	protein_coding	KLF6	155.056	65.4908	12.2003	40.0748
ENSG00000067113	protein_coding	PLPP1	12.4725	57.7494	0	5.27316
ENSG00000067141	protein_coding	NEO1	4.03935	3.33915	0	4.17991
ENSG00000067167	protein_coding	TRAM1	79.2395	36.9028	54.392	62.0244
ENSG00000067177	protein_coding	PHKA1	1.79047	1.17493	0	0
ENSG00000067182	protein_coding	TNFRSF1A	82.7648	85.8868	33.662	42.4618
ENSG00000067191	protein_coding	CACNB1	1.5292	1.20032	0	0.479243
ENSG00000067208	protein_coding	EVI5	3.12226	2.33448	0	0
ENSG00000067221	protein_coding	STOML1	0.849961	1.63977	2.86471	1.19249
ENSG00000067225	protein_coding	PKM	173.833	66.4741	97.8714	90.4762
ENSG00000067248	protein_coding	DHX29	11.8855	4.50334	0	0
ENSG00000067334	protein_coding	DNTTIP2	42.9632	13.9824	0	11.6118
ENSG00000067365	protein_coding	METTL22	2.74239	1.69987	0	0
ENSG00000067369	protein_coding	TP53BP1	7.27994	1.85149	0	0
ENSG00000067445	protein_coding	TRO	0.90801	1.31816	0	0.337621
ENSG00000067533	protein_coding	RRP15	6.87574	3.12422	5.70505	5.61324
ENSG00000067560	protein_coding	RHOA	433.629	379.29	689.612	710.283
ENSG00000067596	protein_coding	DHX8	7.34673	3.6482	0	1.84629
ENSG00000067606	protein_coding	PRKCZ	8.32784	5.32537	0	0
ENSG00000067646	protein_coding	ZFY	2.25058	1.28248	0	0
ENSG00000067704	protein_coding	IARS2	19.7595	8.84648	0	1.91925
ENSG00000067715	protein_coding	SYT1	0.21031	0.0610023	0	0
ENSG00000067798	protein_coding	NAV3	5.6319	0.410936	2.2563	4.61074
ENSG00000067829	protein_coding	IDH3G	24.9553	33.7099	16.5398	16.2736
ENSG00000067836	protein_coding	ROGDI	1.75399	6.90868	0	2.15479
ENSG00000067840	protein_coding	PDZD4	0.630965	3.02693	0	0
ENSG00000067842	protein_coding	ATP2B3	0.00686	0.147804	0	0
ENSG00000067900	protein_coding	ROCK1	8.96868	6.28919	0	2.2521
ENSG00000067955	protein_coding	CBFB	19.4632	9.38333	0	10.2357
ENSG00000067992	protein_coding	PDK3	3.3932	2.52613	1.1051	2.3419
ENSG00000068001	protein_coding	HYAL2	15.4653	160.106	16.9414	1.79509
ENSG00000068024	protein_coding	HDAC4	2.95743	1.6535	1.12055	0.763283
ENSG00000068028	protein_coding	RASSF1	86.2402	30.114	0	0.307828
ENSG00000068078	protein_coding	FGFR3	0.842139	2.05575	0	0
ENSG00000068079	protein_coding	IFI35	30.201	24.3537	30.3691	35.052
ENSG00000068097	protein_coding	HEATR6	1.6872	1.46208	0	0
ENSG00000068120	protein_coding	COASY	16.5728	12.3452	3.71517	0.843549
ENSG00000068137	protein_coding	PLEKHH3	1.01143	1.54177	0	0
ENSG00000068305	protein_coding	MEF2A	27.5749	13.7405	0	11.9512
ENSG00000068308	protein_coding	OTUD5	24.732	17.1745	25.0215	14.8344
ENSG00000068323	protein_coding	TFE3	45.5375	17.4828	17.8031	45.0043
ENSG00000068354	protein_coding	TBC1D25	7.84446	4.61875	11.331	0
ENSG00000068366	protein_coding	ACSL4	44.1163	10.2748	11.4418	33.2533
ENSG00000068383	protein_coding	INPP5A	12.4396	25.3892	0	0.303217
ENSG00000068394	protein_coding	GPKOW	26.245	14.272	0	2.05138
ENSG00000068400	protein_coding	GRIPAP1	16.8463	8.76551	6.56903	5.1375
ENSG00000068438	protein_coding	FTSJ1	36.3844	13.997	0	9.47407
ENSG00000068489	protein_coding	PRR11	0.0506663	0.559506	0	0
ENSG00000068615	protein_coding	REEP1	0.238684	1.39051	0	0
ENSG00000068650	protein_coding	ATP11A	7.77471	3.67319	0	1.89877
ENSG00000068654	protein_coding	POLR1A	4.2203	1.72564	0	0.587034
ENSG00000068697	protein_coding	LAPTM4A	391.575	202.219	135.649	125.4
ENSG00000068724	protein_coding	TTC7A	5.88053	6.1416	0	0
ENSG00000068745	protein_coding	IP6K2	27.4663	11.7909	5.32702	2.62064
ENSG00000068781	protein_coding	STON1-GTF2A1L	0.324953	0.0129664	0	1.58416
ENSG00000068784	protein_coding	SRBD1	2.30484	1.6775	2.96919	10.7867
ENSG00000068796	protein_coding	KIF2A	8.22978	1.83325	0	1.17388
ENSG00000068831	protein_coding	RASGRP2	1.10426	7.33949	17.2349	0.372692
ENSG00000068878	protein_coding	PSME4	24.9695	5.44346	12.9731	2.61831
ENSG00000068885	protein_coding	IFT80	1.88324	1.74582	0	1.92158
ENSG00000068903	protein_coding	SIRT2	9.06718	9.82231	7.22023	4.73602
ENSG00000068912	protein_coding	ERLEC1	32.0007	18.4948	40.4541	18.808
ENSG00000068971	protein_coding	PPP2R5B	11.4895	9.76016	0	0.33742
ENSG00000068976	protein_coding	PYGM	0.798826	3.32297	0	0
ENSG00000068985	protein_coding	PAGE1	0	0	0	0
ENSG00000069011	protein_coding	PITX1	0	0.0647038	0	0.988143
ENSG00000069018	protein_coding	TRPC7	0	0	0	0
ENSG00000069020	protein_coding	MAST4	14.9034	3.77128	5.10377	4.09456
ENSG00000069122	protein_coding	ADGRF5	45.8861	48.9383	18.1543	69.2157
ENSG00000069188	protein_coding	SDK2	0.993589	0.139625	1.25216	0.0947697
ENSG00000069206	protein_coding	ADAM7	0	0	0	0
ENSG00000069248	protein_coding	NUP133	6.92631	4.8893	0	0.93219
ENSG00000069275	protein_coding	NUCKS1	37.3513	37.7285	4.64555	12.306
ENSG00000069329	protein_coding	VPS35	9.5522	5.35439	4.61715	8.61975
ENSG00000069345	protein_coding	DNAJA2	34.5192	14.507	3.02556	19.2352
ENSG00000069399	protein_coding	BCL3	61.4676	53.6082	455.1	284.715
ENSG00000069424	protein_coding	KCNAB2	1.79532	1.90208	0.864422	0
ENSG00000069431	protein_coding	ABCC9	1.00992	1.71596	1.28956	0
ENSG00000069482	protein_coding	GAL	129.398	0.856579	0	0
ENSG00000069493	protein_coding	CLEC2D	11.7329	1.85726	0	0.978056
ENSG00000069509	protein_coding	FUNDC1	6.4137	5.9797	23.8338	4.50967
ENSG00000069535	protein_coding	MAOB	5.26614	28.637	41.3943	30.5461
ENSG00000069667	protein_coding	RORA	4.7906	1.50454	0	0.532799
ENSG00000069696	protein_coding	DRD4	0.344301	0.222562	0	0
ENSG00000069702	protein_coding	TGFBR3	8.23668	10.0294	0	3.83329
ENSG00000069764	protein_coding	PLA2G10	1.25031	1.19737	0	0
ENSG00000069812	protein_coding	HES2	0.449222	0.401596	0	0
ENSG00000069849	protein_coding	ATP1B3	207.647	175.288	28.6197	106.138
ENSG00000069869	protein_coding	NEDD4	4.52664	2.12408	0	2.60999
ENSG00000069943	protein_coding	PIGB	1.33124	2.01038	0	2.99532
ENSG00000069956	protein_coding	MAPK6	23.5409	2.86557	7.05142	3.55792
ENSG00000069966	protein_coding	GNB5	1.17719	1.77891	0	0
ENSG00000069974	protein_coding	RAB27A	20.5593	13.4946	8.02047	19.0203
ENSG00000069998	protein_coding	HDHD5	12.8675	6.00091	0	0
ENSG00000070010	protein_coding	UFD1	14.6471	7.74329	13.7396	7.01919
ENSG00000070018	protein_coding	LRP6	6.90291	2.44318	0	0.437354
ENSG00000070019	protein_coding	GUCY2C	0.0739865	0	0	0
ENSG00000070031	protein_coding	SCT	0.393001	0.105851	0	0
ENSG00000070047	protein_coding	PHRF1	6.96804	3.78242	0	0.391955
ENSG00000070061	protein_coding	ELP1	7.868	4.10043	0	0.561623
ENSG00000070081	protein_coding	NUCB2	13.2849	4.4357	4.97936	2.26118
ENSG00000070087	protein_coding	PFN2	6.64631	8.3614	0	5.19639
ENSG00000070159	protein_coding	PTPN3	4.29672	0.562626	0	0
ENSG00000070182	protein_coding	SPTB	0.122248	0.252122	0	0
ENSG00000070190	protein_coding	DAPP1	2.56709	0.897635	78.3245	84.227
ENSG00000070193	protein_coding	FGF10	0.218057	1.09632	0	0.531519
ENSG00000070214	protein_coding	SLC44A1	4.34768	4.78008	6.15329	5.68169
ENSG00000070269	protein_coding	TMEM260	2.08716	1.64164	0	1.82588
ENSG00000070366	protein_coding	SMG6	4.26425	4.05675	0	0.429118
ENSG00000070367	protein_coding	EXOC5	6.91989	2.56246	2.40211	1.45443
ENSG00000070371	protein_coding	CLTCL1	0.580958	1.31273	0	0
ENSG00000070388	protein_coding	FGF22	0.0558095	0.200423	0	0
ENSG00000070404	protein_coding	FSTL3	82.8952	64.6544	14.8166	25.0445
ENSG00000070413	protein_coding	DGCR2	10.5664	9.35742	0	2.8318
ENSG00000070423	protein_coding	RNF126	13.893	8.74197	21.6969	6.89697
ENSG00000070444	protein_coding	MNT	1.40172	1.08783	0	0.912092
ENSG00000070476	protein_coding	ZXDC	3.53274	2.37783	2.04388	0.928146
ENSG00000070495	protein_coding	JMJD6	46.7099	10.0834	0	2.46917
ENSG00000070501	protein_coding	POLB	9.59081	5.26131	0	10.7685
ENSG00000070526	protein_coding	ST6GALNAC1	0.380445	3.60691	0	0
ENSG00000070540	protein_coding	WIPI1	28.505	10.5694	0	0.666312
ENSG00000070601	protein_coding	FRMPD1	0.01748	0.0753291	0	1.53388
ENSG00000070610	protein_coding	GBA2	40.5109	16.2987	6.23759	2.12442
ENSG00000070614	protein_coding	NDST1	28.079	12.4325	0	0.125635
ENSG00000070669	protein_coding	ASNS	10.4077	3.68455	0	4.63125
ENSG00000070718	protein_coding	AP3M2	8.81913	3.61071	0	1.44516
ENSG00000070729	protein_coding	CNGB1	0.0777668	0.11425	0	0.930558
ENSG00000070731	protein_coding	ST6GALNAC2	5.43996	8.32754	0	0
ENSG00000070748	protein_coding	CHAT	0	0	0	0
ENSG00000070756	protein_coding	PABPC1	344.921	179.116	119.201	75.7278
ENSG00000070759	protein_coding	TESK2	3.67472	2.18081	0	0
ENSG00000070761	protein_coding	CFAP20	34.7524	15.2376	0	0
ENSG00000070770	protein_coding	CSNK2A2	11.2163	4.09868	0	0.159883
ENSG00000070778	protein_coding	PTPN21	6.36057	4.79829	5.85902	0.591254
ENSG00000070785	protein_coding	EIF2B3	8.59054	5.09277	0	5.65037
ENSG00000070808	protein_coding	CAMK2A	0.978558	0.666798	0	0
ENSG00000070814	protein_coding	TCOF1	6.74966	2.70625	0	0.0991109
ENSG00000070831	protein_coding	CDC42	38.9137	20.3036	44.1712	43.5996
ENSG00000070882	protein_coding	OSBPL3	4.45304	1.23896	5.55553	1.9622
ENSG00000070886	protein_coding	EPHA8	0	0	0	0
ENSG00000070915	protein_coding	SLC12A3	0.008362	0	0	0
ENSG00000070950	protein_coding	RAD18	2.44191	1.21177	0	2.92198
ENSG00000070961	protein_coding	ATP2B1	10.3109	3.97656	4.73388	8.00168
ENSG00000070985	protein_coding	TRPM5	0.0521753	0	0	0
ENSG00000071051	protein_coding	NCK2	17.9098	20.8113	0	10.6704
ENSG00000071054	protein_coding	MAP4K4	40.6792	9.52865	12.5237	15.5448
ENSG00000071073	protein_coding	MGAT4A	8.84388	7.91598	1.55454	3.76498
ENSG00000071082	protein_coding	RPL31	290.883	209.733	281.027	426.679
ENSG00000071127	protein_coding	WDR1	87.473	45.9961	40.1905	49.2485
ENSG00000071189	protein_coding	SNX13	2.56856	1.32937	0	0.621487
ENSG00000071203	protein_coding	MS4A12	0	0	0	0
ENSG00000071205	protein_coding	ARHGAP10	4.93491	5.21832	0	0
ENSG00000071242	protein_coding	RPS6KA2	23.6006	26.027	1.81549	1.92367
ENSG00000071243	protein_coding	ING3	6.12204	2.85883	0	1.09012
ENSG00000071246	protein_coding	VASH1	3.73484	7.76234	0	1.09873
ENSG00000071282	protein_coding	LMCD1	59.0894	33.9433	21.5772	16.3307
ENSG00000071462	protein_coding	BUD23	21.9885	11.3682	0	2.56887
ENSG00000071537	protein_coding	SEL1L	16.8298	4.68012	7.84024	2.01752
ENSG00000071539	protein_coding	TRIP13	0.233562	0.335509	0	0
ENSG00000071553	protein_coding	ATP6AP1	38.3539	24.8955	30.7526	16.2926
ENSG00000071564	protein_coding	TCF3	3.22467	2.48675	0	0.372325
ENSG00000071575	protein_coding	TRIB2	19.8473	26.9287	35.9144	16.5562
ENSG00000071626	protein_coding	DAZAP1	24.0396	13.2765	3.25607	6.03769
ENSG00000071655	protein_coding	MBD3	5.35157	6.68075	0	1.00343
ENSG00000071677	protein_coding	PRLH	0	0	0	0
ENSG00000071794	protein_coding	HLTF	1.96458	1.70065	0	0
ENSG00000071859	protein_coding	FAM50A	44.9766	29.1042	17.6092	6.66377
ENSG00000071889	protein_coding	FAM3A	5.36259	9.61089	0	0
ENSG00000071894	protein_coding	CPSF1	8.48815	13.5656	0	1.31002
ENSG00000071909	protein_coding	MYO3B	0	0.0270411	0	0
ENSG00000071967	protein_coding	CYBRD1	18.8852	40.5095	0	3.50729
ENSG00000071991	protein_coding	CDH19	0.0903489	1.81699	0	0
ENSG00000071994	protein_coding	PDCD2	13.6381	7.71199	11.5654	2.80106
ENSG00000072041	protein_coding	SLC6A15	0.118436	0.0127599	0	0
ENSG00000072042	protein_coding	RDH11	14.5789	6.00525	0	2.88691
ENSG00000072062	protein_coding	PRKACA	8.99067	12.3337	9.72383	10.4873
ENSG00000072071	protein_coding	ADGRL1	1.32746	2.39453	0	1.20226
ENSG00000072080	protein_coding	SPP2	0.0408534	0	0	0
ENSG00000072110	protein_coding	ACTN1	55.692	24.7998	49.3398	64.7632
ENSG00000072121	protein_coding	ZFYVE26	4.29128	1.29763	4.76935	0.649743
ENSG00000072133	protein_coding	RPS6KA6	0.481888	0.0886385	0	1.03137
ENSG00000072134	protein_coding	EPN2	7.00226	6.83141	0	0
ENSG00000072135	protein_coding	PTPN18	6.81608	16.4255	7.83997	3.36242
ENSG00000072163	protein_coding	LIMS2	1.71108	29.3641	3.53	0
ENSG00000072182	protein_coding	ASIC4	0.0787499	0	0	0
ENSG00000072195	protein_coding	SPEG	0.0423951	2.03906	1.75549	0
ENSG00000072201	protein_coding	LNX1	0.551347	1.3266	0	0
ENSG00000072210	protein_coding	ALDH3A2	6.58341	4.97543	8.79369	3.84541
ENSG00000072274	protein_coding	TFRC	43.9482	10.6083	1.92194	13.6734
ENSG00000072310	protein_coding	SREBF1	6.94035	2.98551	0	5.364
ENSG00000072315	protein_coding	TRPC5	0	0	0	0
ENSG00000072364	protein_coding	AFF4	23.2629	7.25522	2.65572	1.40699
ENSG00000072401	protein_coding	UBE2D1	14.0634	7.83967	25.8268	8.14461
ENSG00000072415	protein_coding	MPP5	16.8703	2.38564	0	2.59079
ENSG00000072422	protein_coding	RHOBTB1	1.40581	3.41359	0	1.42339
ENSG00000072501	protein_coding	SMC1A	9.07991	3.3192	4.28641	5.62323
ENSG00000072506	protein_coding	HSD17B10	79.3319	67.7945	26.9417	22.4299
ENSG00000072518	protein_coding	MARK2	4.35842	3.02183	4.86824	0.736906
ENSG00000072571	protein_coding	HMMR	0.420587	0.0566405	0	0
ENSG00000072609	protein_coding	CHFR	3.72955	2.21709	0	0.132391
ENSG00000072657	protein_coding	TRHDE	0.0674228	0.272396	0	0.73955
ENSG00000072682	protein_coding	P4HA2	29.3836	2.77668	1.76189	3.46706
ENSG00000072694	protein_coding	FCGR2B	4.33577	2.32723	0	18.0688
ENSG00000072736	protein_coding	NFATC3	3.28059	1.783	0	0
ENSG00000072756	protein_coding	TRNT1	9.99388	1.47783	0	3.12645
ENSG00000072778	protein_coding	ACADVL	168.516	80.5247	6.21559	21.1692
ENSG00000072786	protein_coding	STK10	22.2776	5.70204	3.36053	2.03474
ENSG00000072803	protein_coding	FBXW11	20.9054	8.15647	5.37191	2.64273
ENSG00000072818	protein_coding	ACAP1	4.11626	1.76338	8.07524	0.152794
ENSG00000072832	protein_coding	CRMP1	1.76652	3.71121	0	3.29404
ENSG00000072840	protein_coding	EVC	0.528081	1.25477	0	0
ENSG00000072849	protein_coding	DERL2	19.1967	6.1583	11.734	2.48664
ENSG00000072858	protein_coding	SIDT1	0.506537	0.628619	0	0
ENSG00000072864	protein_coding	NDE1	3.32051	2.60451	5.45306	1.03179
ENSG00000072952	protein_coding	MRVI1	0.671164	8.13472	0	3.23923
ENSG00000072954	protein_coding	TMEM38A	1.97237	4.88368	0	0
ENSG00000072958	protein_coding	AP1M1	4.63178	4.15326	5.21173	0.552231
ENSG00000073008	protein_coding	PVR	90.9435	16.7544	9.82589	2.23102
ENSG00000073050	protein_coding	XRCC1	9.0839	5.95569	0	2.29434
ENSG00000073060	protein_coding	SCARB1	1.46206	6.99837	0	0.439373
ENSG00000073067	protein_coding	CYP2W1	0	0	0	0
ENSG00000073111	protein_coding	MCM2	2.0058	1.46427	0	0
ENSG00000073146	protein_coding	MOV10L1	0.360975	0.105327	0	0
ENSG00000073150	protein_coding	PANX2	0.549606	0.197375	0	0
ENSG00000073169	protein_coding	SELENOO	13.3628	11.8989	0	2.39892
ENSG00000073282	protein_coding	TP63	0.214237	0.268039	0	0.303217
ENSG00000073331	protein_coding	ALPK1	1.75256	1.25123	15.7987	6.53049
ENSG00000073350	protein_coding	LLGL2	4.35183	3.79444	13.2579	0.860081
ENSG00000073417	protein_coding	PDE8A	11.6673	4.7998	0	5.80746
ENSG00000073464	protein_coding	CLCN4	1.08094	0.721702	4.41289	0
ENSG00000073536	protein_coding	NLE1	9.23153	3.21354	0	0
ENSG00000073578	protein_coding	SDHA	20.3534	10.1954	8.5451	2.58695
ENSG00000073584	protein_coding	SMARCE1	6.11369	5.69437	4.05511	3.19188
ENSG00000073598	protein_coding	FNDC8	0	0	0	0
ENSG00000073605	protein_coding	GSDMB	7.42156	1.96121	0	0.959975
ENSG00000073614	protein_coding	KDM5A	7.20911	3.24003	0	2.92174
ENSG00000073670	protein_coding	ADAM11	0.04295	0.242932	0	0.471112
ENSG00000073711	protein_coding	PPP2R3A	3.42539	1.08709	1.92416	2.03882
ENSG00000073712	protein_coding	FERMT2	65.2605	14.0066	1.77001	12.3246
ENSG00000073734	protein_coding	ABCB11	0.0334929	0.0793848	0	0
ENSG00000073737	protein_coding	DHRS9	1.5435	1.20264	7.9891	9.6745
ENSG00000073754	protein_coding	CD5L	0.293039	1.42069	18.2012	0
ENSG00000073756	protein_coding	PTGS2	321.483	8.24854	82.5085	106.59
ENSG00000073792	protein_coding	IGF2BP2	30.2874	4.00973	9.49075	5.26759
ENSG00000073803	protein_coding	MAP3K13	3.52212	2.68581	5.94239	12.8629
ENSG00000073849	protein_coding	ST6GAL1	8.31151	7.25992	1.63998	0.868854
ENSG00000073861	protein_coding	TBX21	3.05156	0.78479	0	0
ENSG00000073910	protein_coding	FRY	0.723712	2.91501	0	0
ENSG00000073921	protein_coding	PICALM	101.444	37.4081	25.9816	32.3565
ENSG00000073969	protein_coding	NSF	8.37406	5.5177	0	9.74034
ENSG00000074047	protein_coding	GLI2	1.31645	0.394393	0	0.463314
ENSG00000074054	protein_coding	CLASP1	4.43756	2.58942	10.843	0.923233
ENSG00000074071	protein_coding	MRPS34	44.0007	46.9986	13.655	8.26786
ENSG00000074181	protein_coding	NOTCH3	2.04345	24.3412	1.59222	6.50738
ENSG00000074201	protein_coding	CLNS1A	14.5416	11.6314	0	16.829
ENSG00000074211	protein_coding	PPP2R2C	0.0220711	0.0237786	1.59936	0.847332
ENSG00000074219	protein_coding	TEAD2	28.4411	36.0223	10.0534	4.56536
ENSG00000074266	protein_coding	EED	5.93704	2.06123	0	0
ENSG00000074276	protein_coding	CDHR2	0	0.0104109	0	0
ENSG00000074317	protein_coding	SNCB	0	0	0	0
ENSG00000074319	protein_coding	TSG101	39.4642	16.3997	12.6303	11.1525
ENSG00000074356	protein_coding	NCBP3	6.8005	3.23778	0	1.23232
ENSG00000074370	protein_coding	ATP2A3	5.37564	9.72521	0	0.822378
ENSG00000074410	protein_coding	CA12	2.57733	0.326205	4.2811	14.0947
ENSG00000074416	protein_coding	MGLL	32.6285	19.322	1.26421	2.39204
ENSG00000074527	protein_coding	NTN4	3.70912	12.6832	0	6.80347
ENSG00000074582	protein_coding	BCS1L	9.98721	7.46433	0	1.34209
ENSG00000074590	protein_coding	NUAK1	1.96896	5.03705	0	0.161777
ENSG00000074603	protein_coding	DPP8	4.31212	2.88448	0	1.99854
ENSG00000074621	protein_coding	SLC24A1	1.14919	1.81424	0	2.74571
ENSG00000074657	protein_coding	ZNF532	4.69618	3.96932	1.25342	3.13054
ENSG00000074660	protein_coding	SCARF1	24.2867	8.06304	0	7.31734
ENSG00000074695	protein_coding	LMAN1	39.2663	8.74148	2.4678	12.8875
ENSG00000074696	protein_coding	HACD3	10.5464	6.87717	0	14.4602
ENSG00000074706	protein_coding	IPCEF1	1.12214	0.453358	0	1.07031
ENSG00000074755	protein_coding	ZZEF1	5.2174	3.1995	0.942823	0.28543
ENSG00000074771	protein_coding	NOX3	0	0	0	0
ENSG00000074800	protein_coding	ENO1	1030.91	169.296	109.13	101.505
ENSG00000074803	protein_coding	SLC12A1	0	0.004337	0	0
ENSG00000074842	protein_coding	MYDGF	181.559	40.4746	44.849	14.9354
ENSG00000074855	protein_coding	ANO8	0.175535	0.17799	0	0
ENSG00000074935	protein_coding	TUBE1	3.71171	2.01121	0	0.639893
ENSG00000074964	protein_coding	ARHGEF10L	3.30713	2.40098	0	0
ENSG00000074966	protein_coding	TXK	1.23757	0.128512	0	0
ENSG00000075035	protein_coding	WSCD2	0.138017	0.198259	0	0
ENSG00000075043	protein_coding	KCNQ2	0.004045	0	0	0
ENSG00000075073	protein_coding	TACR2	0.353728	0.933677	0	0
ENSG00000075089	protein_coding	ACTR6	7.35956	4.293	0	1.784
ENSG00000075131	protein_coding	TIPIN	3.84908	1.52458	0	4.55313
ENSG00000075142	protein_coding	SRI	34.7255	21.0122	3.53542	16.5899
ENSG00000075151	protein_coding	EIF4G3	7.42665	3.34205	6.24409	12.4053
ENSG00000075188	protein_coding	NUP37	3.05218	3.62352	0	0
ENSG00000075213	protein_coding	SEMA3A	1.1498	0.571269	1.61784	2.57137
ENSG00000075218	protein_coding	GTSE1	0.314123	0.0812219	0	0
ENSG00000075223	protein_coding	SEMA3C	14.1568	1.21396	0	0.557572
ENSG00000075234	protein_coding	TTC38	8.04515	7.04918	0	0.633723
ENSG00000075239	protein_coding	ACAT1	8.37405	9.33495	2.55232	4.63614
ENSG00000075240	protein_coding	GRAMD4	2.82598	6.60043	0	1.15663
ENSG00000075275	protein_coding	CELSR1	1.6223	0.947816	2.33946	2.21328
ENSG00000075290	protein_coding	WNT8B	0.0482086	0	0	0
ENSG00000075292	protein_coding	ZNF638	16.4269	5.75791	2.40173	2.9084
ENSG00000075303	protein_coding	SLC25A40	1.35196	1.57702	0	1.561
ENSG00000075336	protein_coding	TIMM21	5.33999	2.67835	2.88235	2.83596
ENSG00000075340	protein_coding	ADD2	0.126416	0.680978	0	0.178921
ENSG00000075388	protein_coding	FGF4	0	0	0	0
ENSG00000075391	protein_coding	RASAL2	7.90784	2.89424	0	2.04925
ENSG00000075399	protein_coding	VPS9D1	1.45446	3.81742	0	7.80712
ENSG00000075407	protein_coding	ZNF37A	2.24115	1.70114	1.13568	1.20335
ENSG00000075413	protein_coding	MARK3	22.4249	11.4036	1.6848	2.6778
ENSG00000075415	protein_coding	SLC25A3	83.5436	47.4349	8.41927	6.49958
ENSG00000075420	protein_coding	FNDC3B	23.691	3.12153	11.2425	23.2294
ENSG00000075426	protein_coding	FOSL2	86.835	99.6631	56.4714	74.8749
ENSG00000075429	protein_coding	CACNG5	0.009773	0.0263226	0	0.321595
ENSG00000075461	protein_coding	CACNG4	0.475977	1.13438	0	1.5821
ENSG00000075539	protein_coding	FRYL	4.55486	2.03523	0	0.43689
ENSG00000075568	protein_coding	TMEM131	5.25831	1.83571	0	0.782362
ENSG00000075618	protein_coding	FSCN1	12.7697	9.15166	12.1489	15.9378
ENSG00000075624	protein_coding	ACTB	2208.93	1871.87	11507.9	12113.6
ENSG00000075643	protein_coding	MOCOS	0.598542	0.441676	0	0.179871
ENSG00000075651	protein_coding	PLD1	2.2223	0.753337	2.32964	1.58687
ENSG00000075673	protein_coding	ATP12A	0.395566	0.0125344	0	1.53138
ENSG00000075702	protein_coding	WDR62	0.131648	0.102119	0	0
ENSG00000075711	protein_coding	DLG1	4.54913	1.94764	0	1.30141
ENSG00000075785	protein_coding	RAB7A	302.65	106.894	253.604	337.816
ENSG00000075790	protein_coding	BCAP29	14.0676	5.9657	19.5951	13.3475
ENSG00000075826	protein_coding	SEC31B	2.70318	1.85966	0	0
ENSG00000075856	protein_coding	SART3	21.5867	5.13252	1.96145	6.08654
ENSG00000075884	protein_coding	ARHGAP15	1.99903	4.22558	7.33454	12.7676
ENSG00000075886	protein_coding	TUBA3D	0.0657501	0	0	0
ENSG00000075891	protein_coding	PAX2	0	0.0445921	0	0
ENSG00000075914	protein_coding	EXOSC7	14.9006	7.64326	0	0
ENSG00000075945	protein_coding	KIFAP3	9.26039	5.60356	6.01831	6.60469
ENSG00000075975	protein_coding	MKRN2	22.1245	12.5601	5.39804	8.57958
ENSG00000076003	protein_coding	MCM6	6.42402	5.52064	0	1.64507
ENSG00000076043	protein_coding	REXO2	24.5894	14.736	0	10.1144
ENSG00000076053	protein_coding	RBM7	15.3171	5.08407	3.79951	2.15675
ENSG00000076067	protein_coding	RBMS2	15.41	23.0543	5.04136	9.66608
ENSG00000076108	protein_coding	BAZ2A	26.7391	9.04672	0	3.32289
ENSG00000076201	protein_coding	PTPN23	7.30866	2.7303	5.01408	3.41542
ENSG00000076242	protein_coding	MLH1	7.48284	3.10174	0	0.14225
ENSG00000076248	protein_coding	UNG	6.98591	14.9009	0	11.0414
ENSG00000076258	protein_coding	FMO4	0.589578	1.75225	11.7857	1.784
ENSG00000076321	protein_coding	KLHL20	4.23763	4.6573	0	1.33569
ENSG00000076344	protein_coding	RGS11	0.926312	4.72297	0	0.472584
ENSG00000076351	protein_coding	SLC46A1	1.57885	1.07099	0	0.142536
ENSG00000076356	protein_coding	PLXNA2	17.2937	7.81779	0	0
ENSG00000076382	protein_coding	SPAG5	4.40732	1.28044	2.87075	0.217273
ENSG00000076513	protein_coding	ANKRD13A	19.5117	7.8176	6.11411	10.1804
ENSG00000076554	protein_coding	TPD52	3.27214	2.47924	0	1.52141
ENSG00000076555	protein_coding	ACACB	0.495241	6.25678	0	0
ENSG00000076604	protein_coding	TRAF4	32.3774	10.1542	0	0
ENSG00000076641	protein_coding	PAG1	13.779	5.8289	0	5.96538
ENSG00000076650	protein_coding	GPATCH1	1.94275	1.54487	0	0
ENSG00000076662	protein_coding	ICAM3	5.78337	11.6627	16.1186	8.53957
ENSG00000076685	protein_coding	NT5C2	29.7188	12.4508	8.71581	29.6845
ENSG00000076706	protein_coding	MCAM	86.9961	83.4865	0	7.33213
ENSG00000076716	protein_coding	GPC4	4.35613	6.89374	12.0827	3.88655
ENSG00000076770	protein_coding	MBNL3	0.601566	0.470104	0	1.0223
ENSG00000076826	protein_coding	CAMSAP3	1.03466	0.0574589	0	0
ENSG00000076864	protein_coding	RAP1GAP	1.29311	0.454709	0	0.984996
ENSG00000076924	protein_coding	XAB2	18.0706	12.995	0	0
ENSG00000076928	protein_coding	ARHGEF1	8.65316	7.34976	1.73455	1.05024
ENSG00000076944	protein_coding	STXBP2	11.1904	12.01	17.3719	12.2088
ENSG00000076984	protein_coding	MAP2K7	4.85155	4.69662	0	0
ENSG00000077009	protein_coding	NMRK2	0	0.341581	0	0
ENSG00000077044	protein_coding	DGKD	19.157	5.49312	0	1.04427
ENSG00000077063	protein_coding	CTTNBP2	0.533926	0.551264	0	0.162682
ENSG00000077080	protein_coding	ACTL6B	0	0	0	0
ENSG00000077092	protein_coding	RARB	3.01942	2.06325	0	3.06662
ENSG00000077097	protein_coding	TOP2B	26.7462	11.8651	0	5.06464
ENSG00000077147	protein_coding	TM9SF3	50.1831	21.8654	35.9797	66.1116
ENSG00000077150	protein_coding	NFKB2	112.458	17.7521	47.6652	54.5941
ENSG00000077152	protein_coding	UBE2T	1.68928	1.0448	0	0
ENSG00000077157	protein_coding	PPP1R12B	1.67286	6.45595	0	0.914776
ENSG00000077232	protein_coding	DNAJC10	5.74848	2.55313	0.684843	2.17696
ENSG00000077235	protein_coding	GTF3C1	5.80177	3.84283	1.29559	0.686396
ENSG00000077238	protein_coding	IL4R	57.8541	83.2042	15.2749	9.63401
ENSG00000077254	protein_coding	USP33	7.27608	4.29775	0	1.14717
ENSG00000077264	protein_coding	PAK3	0.123683	0.207872	0	0
ENSG00000077274	protein_coding	CAPN6	0.0292636	0.425622	0	0.962964
ENSG00000077279	protein_coding	DCX	0	0.0491129	0	0
ENSG00000077312	protein_coding	SNRPA	50.2959	21.6748	38.1969	17.3456
ENSG00000077327	protein_coding	SPAG6	1.15999	0.330388	0	7.02
ENSG00000077348	protein_coding	EXOSC5	13.4866	7.36671	21.9	0
ENSG00000077380	protein_coding	DYNC1I2	31.1729	20.006	3.19054	19.0766
ENSG00000077420	protein_coding	APBB1IP	1.90958	1.39085	11.6937	33.6313
ENSG00000077454	protein_coding	LRCH4	3.20229	3.81772	2.10476	1.43369
ENSG00000077458	protein_coding	FAM76B	2.44216	2.1418	2.48376	0
ENSG00000077463	protein_coding	SIRT6	6.10981	2.81528	5.4491	2.47449
ENSG00000077498	protein_coding	TYR	0	0	0	0
ENSG00000077514	protein_coding	POLD3	7.51567	3.28944	2.72306	1.85486
ENSG00000077522	protein_coding	ACTN2	2.62619	1.83724	0	1.49643
ENSG00000077549	protein_coding	CAPZB	98.6204	98.6692	249.737	204.064
ENSG00000077585	protein_coding	GPR137B	24.7309	9.00206	0	10.32
ENSG00000077616	protein_coding	NAALAD2	0.346069	0.885498	0	0
ENSG00000077684	protein_coding	JADE1	3.62534	8.49435	0	0
ENSG00000077713	protein_coding	SLC25A43	5.00595	7.58973	0	9.58419
ENSG00000077721	protein_coding	UBE2A	22.2321	13.0132	2.87681	32.0066
ENSG00000077782	protein_coding	FGFR1	62.3463	8.06083	4.32873	0.982861
ENSG00000077800	protein_coding	FKBP6	0.0435563	0	0	0
ENSG00000077935	protein_coding	SMC1B	0	0.0392741	0	0
ENSG00000077942	protein_coding	FBLN1	12.5138	48.8832	14.3935	5.29126
ENSG00000077943	protein_coding	ITGA8	1.89209	6.80758	0	0
ENSG00000077984	protein_coding	CST7	96.225	12.8727	369.866	198.498
ENSG00000078018	protein_coding	MAP2	1.97926	2.5664	0	3.55431
ENSG00000078043	protein_coding	PIAS2	2.15737	1.51141	0.854267	0
ENSG00000078053	protein_coding	AMPH	0.0941512	0.456457	0	0
ENSG00000078061	protein_coding	ARAF	22.0753	27.3112	4.2375	17.9601
ENSG00000078070	protein_coding	MCCC1	7.22867	4.10705	0	0.525971
ENSG00000078081	protein_coding	LAMP3	11.36	5.41331	55.4066	130.896
ENSG00000078098	protein_coding	FAP	7.29804	0.479429	0	1.30164
ENSG00000078114	protein_coding	NEBL	3.97419	3.39677	0	0
ENSG00000078124	protein_coding	ACER3	5.91359	3.74614	0	4.43178
ENSG00000078140	protein_coding	UBE2K	26.1491	11.3827	0	16.1961
ENSG00000078142	protein_coding	PIK3C3	4.50365	1.93789	0	1.7189
ENSG00000078177	protein_coding	N4BP2	0.91128	0.300776	0	0.231114
ENSG00000078237	protein_coding	TIGAR	3.28333	1.52695	0	1.32052
ENSG00000078246	protein_coding	TULP3	19.7355	6.21754	4.71204	1.42652
ENSG00000078269	protein_coding	SYNJ2	15.3259	1.71254	4.78695	1.26805
ENSG00000078295	protein_coding	ADCY2	0.014675	0.0695654	0	0
ENSG00000078304	protein_coding	PPP2R5C	8.70549	9.28156	13.6283	9.9972
ENSG00000078328	protein_coding	RBFOX1	0.0152103	0.0436987	0	0
ENSG00000078369	protein_coding	GNB1	117.485	82.6184	135.393	129.504
ENSG00000078399	protein_coding	HOXA9	0.204469	0.60579	0	0
ENSG00000078401	protein_coding	EDN1	109.099	48.4546	44.1658	69.0823
ENSG00000078403	protein_coding	MLLT10	4.43777	2.29907	0	0.248353
ENSG00000078487	protein_coding	ZCWPW1	1.82234	1.9801	0	0
ENSG00000078549	protein_coding	ADCYAP1R1	1.17247	2.6812	0	0
ENSG00000078579	protein_coding	FGF20	0.0561735	0.272336	0	0
ENSG00000078589	protein_coding	P2RY10	5.11593	0.622792	0	2.53631
ENSG00000078596	protein_coding	ITM2A	10.3309	32.6845	0	0
ENSG00000078618	protein_coding	NRDC	33.1229	13.2268	22.1166	23.9367
ENSG00000078668	protein_coding	VDAC3	28.8372	22.6141	32.9635	37.0663
ENSG00000078674	protein_coding	PCM1	9.09446	4.67546	2.07401	2.04064
ENSG00000078687	protein_coding	TNRC6C	1.99537	2.12468	0	0.102037
ENSG00000078699	protein_coding	CBFA2T2	3.63402	1.42476	0	0
ENSG00000078725	protein_coding	BRINP1	0.186762	0.186838	0	0
ENSG00000078747	protein_coding	ITCH	9.06244	3.49512	0	1.98919
ENSG00000078795	protein_coding	PKD2L2	0.0666404	0.155558	0	0
ENSG00000078804	protein_coding	TP53INP2	21.8269	17.7731	0	5.69714
ENSG00000078808	protein_coding	SDF4	29.178	25.7091	9.47075	11.7076
ENSG00000078814	protein_coding	MYH7B	0.0689479	0.378162	0	0
ENSG00000078898	protein_coding	BPIFB2	0	0	0	3.17039
ENSG00000078900	protein_coding	TP73	0.38185	0.18924	0	0.83769
ENSG00000078902	protein_coding	TOLLIP	11.4536	10.7112	0	1.70543
ENSG00000078967	protein_coding	UBE2D4	3.45261	6.23495	0	3.12587
ENSG00000079101	protein_coding	CLUL1	0.120935	0.115814	0	0
ENSG00000079102	protein_coding	RUNX1T1	0.874372	1.76062	0	0
ENSG00000079112	protein_coding	CDH17	0.0133264	0	0	1.1694
ENSG00000079134	protein_coding	THOC1	9.4276	3.16116	0	0.979525
ENSG00000079150	protein_coding	FKBP7	2.26518	4.23005	0	1.47238
ENSG00000079156	protein_coding	OSBPL6	0.368883	1.09048	0	0
ENSG00000079215	protein_coding	SLC1A3	8.00147	0.622097	2.39099	7.96235
ENSG00000079246	protein_coding	XRCC5	107.049	34.4074	38.3881	76.3706
ENSG00000079257	protein_coding	LXN	18.2065	16.9437	0	17.0953
ENSG00000079263	protein_coding	SP140	2.20347	0.787985	75.1394	41.8395
ENSG00000079277	protein_coding	MKNK1	6.82657	4.76054	5.56861	2.52877
ENSG00000079308	protein_coding	TNS1	79.8286	45.5311	0.920064	5.36191
ENSG00000079313	protein_coding	REXO1	2.05644	1.69658	0	2.84499
ENSG00000079332	protein_coding	SAR1A	46.9781	21.5495	6.49967	20.333
ENSG00000079335	protein_coding	CDC14A	4.96156	1.37697	0	0
ENSG00000079337	protein_coding	RAPGEF3	4.74704	9.85604	0	0
ENSG00000079385	protein_coding	CEACAM1	15.7879	1.08397	171.709	150.38
ENSG00000079387	protein_coding	SENP1	8.27516	2.85036	2.45004	7.23184
ENSG00000079393	protein_coding	DUSP13	0.0439639	0	0	0
ENSG00000079432	protein_coding	CIC	2.82512	1.95875	4.73338	4.41837
ENSG00000079435	protein_coding	LIPE	0.761025	0.906205	0	0
ENSG00000079459	protein_coding	FDFT1	31.8311	14.6238	2.88235	9.81679
ENSG00000079462	protein_coding	PAFAH1B3	4.15185	10.5548	0	0
ENSG00000079482	protein_coding	OPHN1	1.25861	1.08065	0	0.140157
ENSG00000079557	protein_coding	AFM	0	0	0	0
ENSG00000079616	protein_coding	KIF22	5.52511	7.88939	0	0
ENSG00000079689	protein_coding	SCGN	0	0.225416	0	0
ENSG00000079691	protein_coding	CARMIL1	2.3453	3.29857	0	0.992613
ENSG00000079739	protein_coding	PGM1	16.7702	17.5896	0	10.0109
ENSG00000079785	protein_coding	DDX1	33.2621	18.0992	0	8.87344
ENSG00000079805	protein_coding	DNM2	7.94243	6.9333	1.1143	2.86743
ENSG00000079819	protein_coding	EPB41L2	15.1934	14.146	0	4.06473
ENSG00000079841	protein_coding	RIMS1	0.0767839	0.0957857	0	0
ENSG00000079931	protein_coding	MOXD1	3.23554	3.86961	0	5.86075
ENSG00000079950	protein_coding	STX7	4.98284	3.80879	2.74234	3.39005
ENSG00000079974	protein_coding	RABL2B	3.09901	3.59486	0	3.28337
ENSG00000079999	protein_coding	KEAP1	17.6604	17.7333	12.5773	1.90383
ENSG00000080007	protein_coding	DDX43	1.74542	1.24682	0	0
ENSG00000080031	protein_coding	PTPRH	0.0356821	0.217841	0	0
ENSG00000080166	protein_coding	DCT	0.0205622	0.0369215	0	0
ENSG00000080189	protein_coding	SLC35C2	8.68255	6.47935	0	1.17668
ENSG00000080200	protein_coding	CRYBG3	3.62449	0.760693	0	0
ENSG00000080224	protein_coding	EPHA6	0	0	0	0
ENSG00000080293	protein_coding	SCTR	0.648635	0.893833	0	0
ENSG00000080298	protein_coding	RFX3	2.3598	1.04187	0	2.33466
ENSG00000080345	protein_coding	RIF1	4.97849	1.24436	0	0.811323
ENSG00000080371	protein_coding	RAB21	18.388	6.82787	6.53396	15.1183
ENSG00000080493	protein_coding	SLC4A4	0.577995	0.647131	0	0
ENSG00000080503	protein_coding	SMARCA2	2.9821	4.47038	2.41671	2.92654
ENSG00000080511	protein_coding	RDH8	0.0258269	0.139125	0	0
ENSG00000080546	protein_coding	SESN1	5.01557	6.61043	0	0.442777
ENSG00000080561	protein_coding	MID2	5.57345	1.36632	14.5104	3.66074
ENSG00000080572	protein_coding	PIH1D3	0.158526	0.11386	0	0
ENSG00000080573	protein_coding	COL5A3	0.914279	5.16309	0	0
ENSG00000080603	protein_coding	SRCAP	1.72341	0.469285	0	0.415468
ENSG00000080608	protein_coding	PUM3	54.6121	14.693	0	8.81251
ENSG00000080618	protein_coding	CPB2	0.449648	1.06576	0	0
ENSG00000080644	protein_coding	CHRNA3	0.0651287	0.0467781	0	0
ENSG00000080709	protein_coding	KCNN2	9.35783	0.154964	0	0.742456
ENSG00000080802	protein_coding	CNOT4	12.0061	2.41835	10.7012	6.3174
ENSG00000080815	protein_coding	PSEN1	18.5999	5.79334	42.1663	27.2405
ENSG00000080819	protein_coding	CPOX	3.22486	1.9929	0	0.359116
ENSG00000080822	protein_coding	CLDND1	49.4676	14.7049	51.7528	54.184
ENSG00000080823	protein_coding	MOK	0.84204	0.739936	1.36351	0
ENSG00000080824	protein_coding	HSP90AA1	566.211	169.611	145.571	337.872
ENSG00000080839	protein_coding	RBL1	0.911074	0.196311	5.03008	0
ENSG00000080845	protein_coding	DLGAP4	17.793	11.2382	10.2261	6.06273
ENSG00000080854	protein_coding	IGSF9B	1.29206	0.86573	0	0
ENSG00000080910	protein_coding	CFHR2	0.0187926	0	0	0
ENSG00000080986	protein_coding	NDC80	0.538026	0.187994	0	0
ENSG00000081014	protein_coding	AP4E1	1.60225	1.17352	0	1.38749
ENSG00000081019	protein_coding	RSBN1	7.04067	2.84961	0	1.6626
ENSG00000081026	protein_coding	MAGI3	2.81308	1.92562	1.78031	2.82961
ENSG00000081041	protein_coding	CXCL2	3817.3	239.039	267.875	400.617
ENSG00000081051	protein_coding	AFP	0.0322897	0.121757	0	0
ENSG00000081052	protein_coding	COL4A4	1.30717	0.476825	0	1.69348
ENSG00000081059	protein_coding	TCF7	2.09422	0.501998	0	0
ENSG00000081087	protein_coding	OSTM1	16.1784	4.75743	0	7.87756
ENSG00000081138	protein_coding	CDH7	0.003557	0.0268271	0	0
ENSG00000081148	protein_coding	IMPG2	0.0618769	0.106662	1.79353	0
ENSG00000081154	protein_coding	PCNP	63.3224	43.6279	19.6776	54.3595
ENSG00000081177	protein_coding	EXD2	3.46566	1.54685	9.56702	1.26714
ENSG00000081181	protein_coding	ARG2	23.5092	0.755695	0	0
ENSG00000081189	protein_coding	MEF2C	3.46875	4.97333	0	1.54315
ENSG00000081237	protein_coding	PTPRC	18.6132	2.28346	26.1424	37.9641
ENSG00000081248	protein_coding	CACNA1S	0.0341514	0.0183967	0	0
ENSG00000081277	protein_coding	PKP1	6.35698	0.833686	0	0.365072
ENSG00000081307	protein_coding	UBA5	8.85676	5.0401	4.38833	1.49459
ENSG00000081320	protein_coding	STK17B	11.5779	7.28405	13.6883	21.0653
ENSG00000081377	protein_coding	CDC14B	1.29261	1.40324	0	0.108232
ENSG00000081386	protein_coding	ZNF510	2.77556	1.04378	0	2.48919
ENSG00000081479	protein_coding	LRP2	0.0577461	0.0622135	0	0
ENSG00000081665	protein_coding	ZNF506	4.27006	1.69304	0	1.78315
ENSG00000081692	protein_coding	JMJD4	4.58709	3.5355	0	1.57645
ENSG00000081721	protein_coding	DUSP12	26.6024	11.8813	17.0029	6.43434
ENSG00000081760	protein_coding	AACS	1.51762	1.18027	0.933946	0.636172
ENSG00000081791	protein_coding	DELE1	21.5676	15.5712	0	5.8576
ENSG00000081800	protein_coding	SLC13A1	0	0.164465	0	0
ENSG00000081803	protein_coding	CADPS2	7.10442	4.19004	0	2.13743
ENSG00000081818	protein_coding	PCDHB4	1.0727	1.71158	0	1.78728
ENSG00000081842	protein_coding	PCDHA6	0	0.0544436	0	0
ENSG00000081853	protein_coding	PCDHGA2	0.092285	0.207134	0	0
ENSG00000081870	protein_coding	HSPB11	9.67795	5.59185	0	7.70768
ENSG00000081913	protein_coding	PHLPP1	2.59797	1.26722	0	0
ENSG00000081923	protein_coding	ATP8B1	5.02972	6.16352	0	3.71027
ENSG00000081985	protein_coding	IL12RB2	0.607583	0.0125882	0	0
ENSG00000082014	protein_coding	SMARCD3	6.10452	10.1437	0	1.09054
ENSG00000082068	protein_coding	WDR70	4.54033	2.9813	6.45115	0.488256
ENSG00000082074	protein_coding	FYB1	3.19896	1.69806	35.5327	39.6991
ENSG00000082126	protein_coding	MPP4	0.0734681	0.124381	0	0
ENSG00000082146	protein_coding	STRADB	3.31843	3.18959	0	2.85484
ENSG00000082153	protein_coding	BZW1	82.7257	27.2845	31.4969	34.4957
ENSG00000082175	protein_coding	PGR	0.495938	0.602514	0	0
ENSG00000082196	protein_coding	C1QTNF3	0.606975	2.10192	0	0
ENSG00000082212	protein_coding	ME2	4.67155	1.84927	0	4.99221
ENSG00000082213	protein_coding	C5orf22	8.52601	3.88105	0	3.55487
ENSG00000082258	protein_coding	CCNT2	11.4331	3.32925	1.64955	1.24846
ENSG00000082269	protein_coding	FAM135A	2.5281	0.899129	0	0
ENSG00000082293	protein_coding	COL19A1	0.0281428	0.0707467	0	0
ENSG00000082397	protein_coding	EPB41L3	23.3179	4.05617	3.68259	8.64024
ENSG00000082438	protein_coding	COBLL1	4.05242	1.99335	0	2.30996
ENSG00000082458	protein_coding	DLG3	2.86963	2.80864	3.80675	1.87274
ENSG00000082482	protein_coding	KCNK2	0.0264346	0.327516	0	0
ENSG00000082497	protein_coding	SERTAD4	1.02981	0.926264	0	2.07263
ENSG00000082512	protein_coding	TRAF5	5.56206	2.51173	0	0
ENSG00000082515	protein_coding	MRPL22	9.15978	4.90776	2.84566	0.861497
ENSG00000082516	protein_coding	GEMIN5	8.05777	3.34421	0	3.41485
ENSG00000082556	protein_coding	OPRK1	0	0.14555	0	0
ENSG00000082641	protein_coding	NFE2L1	38.8717	49.7909	5.09249	12.9118
ENSG00000082684	protein_coding	SEMA5B	0	0.37916	0	0
ENSG00000082701	protein_coding	GSK3B	14.5674	4.99706	0	6.67227
ENSG00000082781	protein_coding	ITGB5	16.2059	14.9556	2.29924	9.74503
ENSG00000082805	protein_coding	ERC1	6.70332	3.67908	0	1.09304
ENSG00000082898	protein_coding	XPO1	10.9185	4.40941	2.543	3.75312
ENSG00000082996	protein_coding	RNF13	24.3257	12.8817	4.12093	35.2439
ENSG00000083067	protein_coding	TRPM3	0.0233586	0.0615161	0	0
ENSG00000083093	protein_coding	PALB2	3.85392	1.84146	0	2.14948
ENSG00000083097	protein_coding	DOP1A	2.01676	1.20834	0	0
ENSG00000083099	protein_coding	LYRM2	3.80672	4.19748	0	2.61379
ENSG00000083123	protein_coding	BCKDHB	0.761674	2.03782	0	0.278489
ENSG00000083168	protein_coding	KAT6A	5.69818	2.61057	1.2409	2.91145
ENSG00000083223	protein_coding	TUT7	12.7831	2.341	2.23342	5.24014
ENSG00000083290	protein_coding	ULK2	2.22576	2.21176	3.03599	0.689337
ENSG00000083307	protein_coding	GRHL2	1.79295	0.551901	0	0
ENSG00000083312	protein_coding	TNPO1	12.3147	3.84913	6.25347	2.0825
ENSG00000083444	protein_coding	PLOD1	29.7935	18.2418	0	5.75389
ENSG00000083454	protein_coding	P2RX5	1.66874	0.359567	0	0
ENSG00000083457	protein_coding	ITGAE	2.95893	2.69027	0	0.34345
ENSG00000083520	protein_coding	DIS3	10.2119	3.2682	0	1.36027
ENSG00000083535	protein_coding	PIBF1	6.88814	2.77123	0	1.62775
ENSG00000083544	protein_coding	TDRD3	2.68869	3.87886	0	0.724613
ENSG00000083635	protein_coding	NUFIP1	7.945	2.09591	0	1.95471
ENSG00000083642	protein_coding	PDS5B	3.25667	1.7902	1.13593	1.97739
ENSG00000083720	protein_coding	OXCT1	4.61335	4.26409	0	0
ENSG00000083750	protein_coding	RRAGB	5.23434	7.0491	10.9942	0
ENSG00000083782	protein_coding	EPYC	0	0	0	0
ENSG00000083799	protein_coding	CYLD	43.7804	3.80812	0	14.8783
ENSG00000083807	protein_coding	SLC27A5	0.695501	0.770121	0	0.423824
ENSG00000083812	protein_coding	ZNF324	2.35405	1.54332	0	0
ENSG00000083814	protein_coding	ZNF671	2.32646	1.78131	0	0
ENSG00000083817	protein_coding	ZNF416	3.45208	1.77206	0	0
ENSG00000083828	protein_coding	ZNF586	4.15889	3.00741	2.7335	3.72393
ENSG00000083838	protein_coding	ZNF446	0.791235	2.38218	0	0
ENSG00000083844	protein_coding	ZNF264	1.97531	0.866353	0	0
ENSG00000083845	protein_coding	RPS5	396.02	216.953	45.5558	38.8672
ENSG00000083857	protein_coding	FAT1	12.064	2.30742	0	4.20757
ENSG00000083896	protein_coding	YTHDC1	38.1056	13.4127	8.5208	12.0918
ENSG00000083937	protein_coding	CHMP2B	40.5106	13.0701	19.2416	16.7475
ENSG00000084070	protein_coding	SMAP2	22.5461	35.4228	162.234	130.028
ENSG00000084072	protein_coding	PPIE	6.02092	4.69987	2.6932	0.40767
ENSG00000084073	protein_coding	ZMPSTE24	13.3444	9.73023	0	22.0878
ENSG00000084090	protein_coding	STARD7	39.07	33.9187	10.1809	9.5034
ENSG00000084092	protein_coding	NOA1	8.43463	6.92833	6.75364	8.68954
ENSG00000084093	protein_coding	REST	5.90402	2.34344	0	0
ENSG00000084110	protein_coding	HAL	0.100427	0.151474	0	0
ENSG00000084112	protein_coding	SSH1	35.8039	14.1473	1.03037	2.49548
ENSG00000084207	protein_coding	GSTP1	338.173	322.924	161.345	106.689
ENSG00000084234	protein_coding	APLP2	96.7807	62.0414	106.38	215.717
ENSG00000084444	protein_coding	FAM234B	2.71876	1.8089	0	2.70338
ENSG00000084453	protein_coding	SLCO1A2	0.282623	0.0338319	0	0
ENSG00000084463	protein_coding	WBP11	30.5281	14.6448	2.84891	10.9966
ENSG00000084623	protein_coding	EIF3I	350.762	103.706	208.411	71.6386
ENSG00000084628	protein_coding	NKAIN1	0	0	0	0
ENSG00000084636	protein_coding	COL16A1	4.30058	2.73785	0	0
ENSG00000084652	protein_coding	TXLNA	37.0266	24.0827	0	3.99045
ENSG00000084674	protein_coding	APOB	0	0.0563235	0	0
ENSG00000084676	protein_coding	NCOA1	7.96774	6.44295	1.73515	8.53613
ENSG00000084693	protein_coding	AGBL5	2.0934	4.57393	0	0.2146
ENSG00000084710	protein_coding	EFR3B	0.422449	0.549296	0	0
ENSG00000084731	protein_coding	KIF3C	0.524789	1.70486	0	0
ENSG00000084733	protein_coding	RAB10	62.8245	21.5305	16.398	86.5656
ENSG00000084734	protein_coding	GCKR	0.853394	0.459707	0	0
ENSG00000084754	protein_coding	HADHA	43.5416	39.8524	48.4216	8.37667
ENSG00000084764	protein_coding	MAPRE3	4.62951	3.20745	0	1.87497
ENSG00000084774	protein_coding	CAD	3.97253	1.9256	1.7742	0.13428
ENSG00000085063	protein_coding	CD59	463.459	126.922	93.5426	92.8953
ENSG00000085117	protein_coding	CD82	56.1451	18.4306	11.1262	2.80696
ENSG00000085185	protein_coding	BCORL1	2.43016	1.46227	3.74677	0.425361
ENSG00000085224	protein_coding	ATRX	3.66687	1.82355	0	0
ENSG00000085231	protein_coding	AK6	35.4754	10.407	0	12.7147
ENSG00000085265	protein_coding	FCN1	0.238375	4.81346	57.2493	55.1326
ENSG00000085274	protein_coding	MYNN	9.34381	2.3612	0	2.57216
ENSG00000085276	protein_coding	MECOM	2.07611	2.29685	0	0.489732
ENSG00000085365	protein_coding	SCAMP1	4.31302	3.31788	6.66153	4.20149
ENSG00000085377	protein_coding	PREP	11.2087	3.93996	1.67989	2.41571
ENSG00000085382	protein_coding	HACE1	0.850417	2.00119	0	0.981903
ENSG00000085415	protein_coding	SEH1L	10.3793	4.94039	0	2.92059
ENSG00000085433	protein_coding	WDR47	5.63183	3.38623	0	2.56326
ENSG00000085449	protein_coding	WDFY1	28.021	6.71989	5.46201	19.2228
ENSG00000085465	protein_coding	OVGP1	5.76268	2.43037	0	0
ENSG00000085491	protein_coding	SLC25A24	5.42459	2.42545	0	1.01136
ENSG00000085511	protein_coding	MAP3K4	6.89107	2.82015	0	1.80866
ENSG00000085514	protein_coding	PILRA	24.6712	8.78532	188.186	116.222
ENSG00000085552	protein_coding	IGSF9	0.194665	0	0	0.17082
ENSG00000085563	protein_coding	ABCB1	1.22319	6.93586	0	2.64808
ENSG00000085644	protein_coding	ZNF213	0.722006	0.630933	0	0
ENSG00000085662	protein_coding	AKR1B1	53.2495	26.2541	16.398	68.5699
ENSG00000085719	protein_coding	CPNE3	6.85021	8.19834	6.67043	12.9579
ENSG00000085721	protein_coding	RRN3	35.1909	14.4017	3.60432	6.54704
ENSG00000085733	protein_coding	CTTN	47.5298	36.0394	0	3.9156
ENSG00000085741	protein_coding	WNT11	0.762879	1.31504	0	0
ENSG00000085760	protein_coding	MTIF2	4.16623	4.81857	0	0.672039
ENSG00000085788	protein_coding	DDHD2	3.90488	3.27795	0	0.214966
ENSG00000085831	protein_coding	TTC39A	1.25859	0.93371	0	0
ENSG00000085832	protein_coding	EPS15	12.8744	8.39919	0	12.7541
ENSG00000085840	protein_coding	ORC1	0.645788	0.214076	0	0
ENSG00000085871	protein_coding	MGST2	8.37431	16.9561	9.44487	5.36127
ENSG00000085872	protein_coding	CHERP	10.9889	5.17436	2.49037	0.753935
ENSG00000085978	protein_coding	ATG16L1	9.35822	5.11936	0	0.374973
ENSG00000085982	protein_coding	USP40	6.66441	4.44135	0	0.242457
ENSG00000085998	protein_coding	POMGNT1	11.1309	7.09802	2.42035	2.56459
ENSG00000085999	protein_coding	RAD54L	0.266128	0	0	0
ENSG00000086015	protein_coding	MAST2	5.37181	4.28874	0	0.421879
ENSG00000086061	protein_coding	DNAJA1	380.953	131.16	112.291	226.491
ENSG00000086062	protein_coding	B4GALT1	65.335	32.7863	15.2822	44.8773
ENSG00000086065	protein_coding	CHMP5	63.2432	30.575	56.3848	184.925
ENSG00000086102	protein_coding	NFX1	11.2023	5.80462	0	0.793262
ENSG00000086159	protein_coding	AQP6	0.0705317	0	0	0
ENSG00000086189	protein_coding	DIMT1	15.5433	5.72049	0	17.4816
ENSG00000086200	protein_coding	IPO11	2.9541	2.37036	0	1.65398
ENSG00000086205	protein_coding	FOLH1	0.0871821	0.688796	0	0
ENSG00000086232	protein_coding	EIF2AK1	18.2083	16.1295	30.0028	33.0293
ENSG00000086288	protein_coding	NME8	0.127342	0.480177	0	0
ENSG00000086289	protein_coding	EPDR1	5.70706	6.62924	0	13.0501
ENSG00000086300	protein_coding	SNX10	13.412	8.84702	12.7739	76.3769
ENSG00000086475	protein_coding	SEPHS1	10.5515	10.78	0	0
ENSG00000086504	protein_coding	MRPL28	20.2622	25.0941	4.90651	0.742699
ENSG00000086506	protein_coding	HBQ1	0.783024	0	0	0
ENSG00000086544	protein_coding	ITPKC	93.8989	153.081	0	4.02985
ENSG00000086548	protein_coding	CEACAM6	34.5463	15.5769	60.8102	139.607
ENSG00000086570	protein_coding	FAT2	0.0142202	0	0	0
ENSG00000086589	protein_coding	RBM22	45.2971	19.9614	16.7043	41.4047
ENSG00000086598	protein_coding	TMED2	105.638	41.1373	7.81611	65.9592
ENSG00000086619	protein_coding	ERO1B	13.1342	2.18363	2.58804	3.91752
ENSG00000086666	protein_coding	ZFAND6	26.1156	15.1593	0	7.70047
ENSG00000086696	protein_coding	HSD17B2	0.265747	0.449909	0	0
ENSG00000086712	protein_coding	TXLNG	19.2566	7.04875	16.8121	1.78139
ENSG00000086717	protein_coding	PPEF1	0.117688	0.285283	0	0
ENSG00000086730	protein_coding	LAT2	5.98096	4.42236	0	7.48337
ENSG00000086758	protein_coding	HUWE1	26.1178	6.75987	1.72387	7.04545
ENSG00000086827	protein_coding	ZW10	10.1729	3.37961	0	0.388796
ENSG00000086848	protein_coding	ALG9	3.1059	2.1181	1.8562	2.1073
ENSG00000086967	protein_coding	MYBPC2	0.486363	0.149711	0	0
ENSG00000086991	protein_coding	NOX4	0.0338938	0.337772	0	0
ENSG00000087008	protein_coding	ACOX3	9.98386	6.41321	3.89484	3.2426
ENSG00000087053	protein_coding	MTMR2	10.895	5.01363	9.79217	8.15233
ENSG00000087074	protein_coding	PPP1R15A	974.814	184.09	136.844	108.01
ENSG00000087076	protein_coding	HSD17B14	11.1539	15.4716	0	14.2736
ENSG00000087077	protein_coding	TRIP6	20.9107	13.8703	0	37.7466
ENSG00000087085	protein_coding	ACHE	12.4569	1.14799	0	1.11314
ENSG00000087086	protein_coding	FTL	13546.9	14332.8	18917.9	14074.7
ENSG00000087087	protein_coding	SRRT	38.0204	21.9708	3.08348	10.0351
ENSG00000087088	protein_coding	BAX	36.3176	30.4538	17.371	9.20306
ENSG00000087095	protein_coding	NLK	5.90593	5.88415	9.42309	7.13187
ENSG00000087111	protein_coding	PIGS	10.8735	7.30987	0	1.34442
ENSG00000087116	protein_coding	ADAMTS2	8.94284	4.06374	0	0
ENSG00000087128	protein_coding	TMPRSS11E	0	0.0786407	0	0
ENSG00000087152	protein_coding	ATXN7L3	12.7127	6.38597	0	0.855484
ENSG00000087157	protein_coding	PGS1	12.8126	8.39898	8.88468	10.5349
ENSG00000087191	protein_coding	PSMC5	61.3174	43.2904	0	3.44438
ENSG00000087206	protein_coding	UIMC1	18.9069	6.98453	0	1.90263
ENSG00000087237	protein_coding	CETP	1.38686	1.46131	0	0
ENSG00000087245	protein_coding	MMP2	181.428	53.0866	66.8447	88.4146
ENSG00000087250	protein_coding	MT3	0.618917	0	0	0
ENSG00000087253	protein_coding	LPCAT2	2.20451	1.05894	0	2.77233
ENSG00000087258	protein_coding	GNAO1	0.0457949	0.197351	0	0
ENSG00000087263	protein_coding	OGFOD1	12.3587	4.63418	2.59207	14.3212
ENSG00000087266	protein_coding	SH3BP2	6.34206	5.07651	3.22882	2.52519
ENSG00000087269	protein_coding	NOP14	30.6825	9.30829	4.20893	8.28238
ENSG00000087274	protein_coding	ADD1	15.8356	25.9804	0	4.37138
ENSG00000087299	protein_coding	L2HGDH	0.693263	0.636558	0	0
ENSG00000087301	protein_coding	TXNDC16	1.24477	1.28224	6.32984	0
ENSG00000087302	protein_coding	RTRAF	35.2409	13.6523	14.4608	25.0359
ENSG00000087303	protein_coding	NID2	1.64126	1.09753	0	1.0642
ENSG00000087338	protein_coding	GMCL1	3.39108	2.28765	0	4.40328
ENSG00000087365	protein_coding	SF3B2	35.1601	18.9628	13.7638	9.49115
ENSG00000087448	protein_coding	KLHL42	4.97469	4.30376	0	0
ENSG00000087460	protein_coding	GNAS	42.8489	41.031	75.1891	103.474
ENSG00000087470	protein_coding	DNM1L	14.5912	7.60005	0	12.1438
ENSG00000087494	protein_coding	PTHLH	0.440149	0.277979	0	0
ENSG00000087495	protein_coding	PHACTR3	1.62584	0.903177	0	0
ENSG00000087502	protein_coding	ERGIC2	9.7753	5.60981	0	10.8975
ENSG00000087510	protein_coding	TFAP2C	2.20426	0.909098	0	0
ENSG00000087586	protein_coding	AURKA	1.58851	0.570468	0	0
ENSG00000087589	protein_coding	CASS4	0.825813	1.70251	0	0
ENSG00000087842	protein_coding	PIR	6.97428	13.8972	0	2.70795
ENSG00000087884	protein_coding	AAMDC	8.5911	15.6172	0	11.0864
ENSG00000087903	protein_coding	RFX2	5.31344	2.8898	4.94158	0.997343
ENSG00000087995	protein_coding	METTL2A	6.02458	3.02801	0	2.06508
ENSG00000088002	protein_coding	SULT2B1	3.88238	1.7165	0	0
ENSG00000088035	protein_coding	ALG6	1.13964	1.49164	0	4.13242
ENSG00000088038	protein_coding	CNOT3	5.3945	2.49778	0	1.32969
ENSG00000088053	protein_coding	GP6	0.114716	0.102992	0	0
ENSG00000088179	protein_coding	PTPN4	1.14056	0.922649	0	0.853969
ENSG00000088205	protein_coding	DDX18	29.9037	9.47689	0	10.5997
ENSG00000088247	protein_coding	KHSRP	13.6702	9.35892	3.28283	36.7723
ENSG00000088256	protein_coding	GNA11	8.36247	12.4555	0	0.360773
ENSG00000088280	protein_coding	ASAP3	1.86494	5.16815	0	0
ENSG00000088298	protein_coding	EDEM2	21.1766	17.7613	0	4.21237
ENSG00000088305	protein_coding	DNMT3B	0.390666	0.456966	3.23533	0
ENSG00000088320	protein_coding	REM1	1.02737	6.03733	0	0
ENSG00000088325	protein_coding	TPX2	0.54475	0.324336	0	0.943465
ENSG00000088356	protein_coding	PDRG1	32.0324	15.4771	0	5.21388
ENSG00000088367	protein_coding	EPB41L1	1.84265	5.87504	1.54812	0
ENSG00000088386	protein_coding	SLC15A1	0.0122754	0.0661255	0	0
ENSG00000088387	protein_coding	DOCK9	15.3546	7.11378	0	1.53041
ENSG00000088448	protein_coding	ANKRD10	76.2679	29.6996	13.1313	3.23
ENSG00000088451	protein_coding	TGDS	7.95998	2.94522	0	4.40968
ENSG00000088538	protein_coding	DOCK3	0.256432	0.313106	0	0
ENSG00000088543	protein_coding	C3orf18	1.17888	2.78045	0	0
ENSG00000088682	protein_coding	COQ9	6.68879	5.06629	0	2.09999
ENSG00000088726	protein_coding	TMEM40	0.203772	0.0168874	0	0
ENSG00000088727	protein_coding	KIF9	2.19086	2.5507	2.56061	0.1938
ENSG00000088756	protein_coding	ARHGAP28	0.195263	0.51891	0	0
ENSG00000088766	protein_coding	CRLS1	12.1327	8.97357	0	6.97095
ENSG00000088782	protein_coding	DEFB127	0	0	0	0
ENSG00000088808	protein_coding	PPP1R13B	12.0386	5.90335	0	0
ENSG00000088812	protein_coding	ATRN	3.78862	3.2184	0	0.775553
ENSG00000088826	protein_coding	SMOX	20.0508	8.25904	0	4.23321
ENSG00000088827	protein_coding	SIGLEC1	0.76674	0.45186	0	2.58777
ENSG00000088832	protein_coding	FKBP1A	391.137	293.21	790.54	1132.41
ENSG00000088833	protein_coding	NSFL1C	26.3977	15.2259	16.0553	11.9779
ENSG00000088836	protein_coding	SLC4A11	0.215381	0.116022	0	0.262498
ENSG00000088854	protein_coding	C20orf194	4.27184	3.35722	0	0.265479
ENSG00000088876	protein_coding	ZNF343	5.17575	3.29773	0	0
ENSG00000088881	protein_coding	EBF4	2.23848	2.92094	0	0
ENSG00000088882	protein_coding	CPXM1	0.97878	3.2338	0	1.43148
ENSG00000088888	protein_coding	MAVS	5.13679	4.41788	0	1.63736
ENSG00000088899	protein_coding	LZTS3	3.12281	1.53771	0	0
ENSG00000088926	protein_coding	F11	0.569187	0.0418105	0	0
ENSG00000088930	protein_coding	XRN2	51.164	24.8818	21.9771	7.31868
ENSG00000088970	protein_coding	KIZ	2.75916	3.27201	0	0.653196
ENSG00000088986	protein_coding	DYNLL1	92.0218	72.5272	102.215	138.477
ENSG00000088992	protein_coding	TESC	5.36652	30.9031	0	8.24103
ENSG00000089006	protein_coding	SNX5	20.5796	11.1803	15.0681	3.42129
ENSG00000089009	protein_coding	RPL6	442.862	305.457	154.949	202.424
ENSG00000089012	protein_coding	SIRPG	0.391861	0.198671	0	0
ENSG00000089022	protein_coding	MAPKAPK5	2.83974	1.60874	0	1.07267
ENSG00000089041	protein_coding	P2RX7	3.53166	0.833257	0	1.43096
ENSG00000089048	protein_coding	ESF1	11.4897	6.28451	0	0
ENSG00000089050	protein_coding	RBBP9	4.28982	3.73792	3.89788	8.26033
ENSG00000089053	protein_coding	ANAPC5	10.0164	8.61575	0	3.14437
ENSG00000089057	protein_coding	SLC23A2	7.27195	4.88271	0	2.10898
ENSG00000089060	protein_coding	SLC8B1	9.95718	6.28512	0	1.50762
ENSG00000089063	protein_coding	TMEM230	35.8251	41.0055	24.5486	59.0833
ENSG00000089091	protein_coding	DZANK1	0.38258	0.336472	0	0
ENSG00000089094	protein_coding	KDM2B	5.33401	1.70317	0	2.41184
ENSG00000089101	protein_coding	CFAP61	0.162426	0	0	1.39431
ENSG00000089116	protein_coding	LHX5	0	0	0	0
ENSG00000089123	protein_coding	TASP1	5.20899	4.01679	0	4.69615
ENSG00000089127	protein_coding	OAS1	11.7249	3.92144	300.137	464.184
ENSG00000089154	protein_coding	GCN1	19.2006	7.63118	1.55068	3.87299
ENSG00000089157	protein_coding	RPLP0	719.108	441.4	71.367	93.5299
ENSG00000089159	protein_coding	PXN	53.2383	52.6101	6.02395	7.59873
ENSG00000089163	protein_coding	SIRT4	1.90309	0.911254	0	0
ENSG00000089169	protein_coding	RPH3A	0	0.0704369	7.28862	1.32394
ENSG00000089177	protein_coding	KIF16B	1.45916	1.61531	0	0
ENSG00000089195	protein_coding	TRMT6	14.0025	6.66719	0	8.69103
ENSG00000089199	protein_coding	CHGB	0.0232425	0.162764	0	0
ENSG00000089220	protein_coding	PEBP1	133.466	264.34	29.6821	47.9252
ENSG00000089225	protein_coding	TBX5	5.37762	21.9112	13.7333	2.85836
ENSG00000089234	protein_coding	BRAP	8.55777	4.71155	0	4.38298
ENSG00000089248	protein_coding	ERP29	26.8992	44.7211	19.6518	14.8735
ENSG00000089250	protein_coding	NOS1	0.102469	0.365155	0	0
ENSG00000089280	protein_coding	FUS	47.3374	44.9569	24.7644	46.0857
ENSG00000089289	protein_coding	IGBP1	32.3552	30.4674	0	26.7619
ENSG00000089327	protein_coding	FXYD5	62.6341	60.1266	105.172	57.6152
ENSG00000089335	protein_coding	ZNF302	7.50751	3.91691	0	2.70365
ENSG00000089351	protein_coding	GRAMD1A	21.3433	15.2172	40.3354	30.1463
ENSG00000089356	protein_coding	FXYD3	30.2265	12.3246	4.49297	18.7028
ENSG00000089472	protein_coding	HEPH	1.06076	4.28952	2.10594	0.956331
ENSG00000089486	protein_coding	CDIP1	7.23079	8.38942	0	1.85683
ENSG00000089505	protein_coding	CMTM1	0.246933	0.190026	0	0
ENSG00000089558	protein_coding	KCNH4	0.0682149	0.19108	0	0
ENSG00000089597	protein_coding	GANAB	57.2483	36.0742	35.7365	39.6693
ENSG00000089639	protein_coding	GMIP	5.45892	2.13456	0	1.82369
ENSG00000089682	protein_coding	RBM41	0.703066	0.939977	0	0.185827
ENSG00000089685	protein_coding	BIRC5	0.325114	0.685937	0	1.48588
ENSG00000089692	protein_coding	LAG3	5.27619	1.63972	4.90169	0
ENSG00000089693	protein_coding	MLF2	65.6485	60.5518	95.0832	166.416
ENSG00000089723	protein_coding	OTUB2	0.621471	0	0	0
ENSG00000089737	protein_coding	DDX24	52.214	21.9489	12.1828	22.3927
ENSG00000089775	protein_coding	ZBTB25	1.86366	0.81042	0	0.55625
ENSG00000089818	protein_coding	NECAP1	11.4713	4.87377	23.8718	18.4546
ENSG00000089820	protein_coding	ARHGAP4	2.85257	8.15209	0	0
ENSG00000089847	protein_coding	ANKRD24	0.127062	0.087113	0	0.253404
ENSG00000089876	protein_coding	DHX32	14.3123	4.08539	0	0
ENSG00000089902	protein_coding	RCOR1	10.5877	4.01483	0	0.548667
ENSG00000089916	protein_coding	GPATCH2L	6.16056	1.42568	0	1.28909
ENSG00000090006	protein_coding	LTBP4	9.49074	10.0808	5.54251	6.43211
ENSG00000090013	protein_coding	BLVRB	57.0622	44.3212	9.28677	16.8689
ENSG00000090020	protein_coding	SLC9A1	13.5643	4.21514	0	0
ENSG00000090054	protein_coding	SPTLC1	14.0685	5.48826	0	10.0962
ENSG00000090060	protein_coding	PAPOLA	25.0327	11.0398	11.0087	28.4953
ENSG00000090061	protein_coding	CCNK	10.5937	3.29189	12.7563	14.8957
ENSG00000090097	protein_coding	PCBP4	3.35959	10.2925	0	0.909896
ENSG00000090104	protein_coding	RGS1	14.8544	11.8489	7.35374	11.1314
ENSG00000090238	protein_coding	YPEL3	18.9595	29.5454	169.527	93.0222
ENSG00000090263	protein_coding	MRPS33	3.38947	3.68354	8.56791	6.48463
ENSG00000090266	protein_coding	NDUFB2	22.336	26.9311	6.73693	13.512
ENSG00000090273	protein_coding	NUDC	117.15	56.6747	10.5194	22.2924
ENSG00000090316	protein_coding	MAEA	9.51923	5.38578	3.05052	2.65511
ENSG00000090339	protein_coding	ICAM1	815.348	274.82	516.986	443.233
ENSG00000090372	protein_coding	STRN4	10.6851	5.35124	70.6121	28.5028
ENSG00000090376	protein_coding	IRAK3	11.1756	9.6206	26.2854	25.2772
ENSG00000090382	protein_coding	LYZ	110.883	156.957	278.043	311.052
ENSG00000090402	protein_coding	SI	0	0	0	0
ENSG00000090432	protein_coding	MUL1	31.757	12.0161	0	0.46694
ENSG00000090447	protein_coding	TFAP4	1.3204	0.94129	0	1.00878
ENSG00000090470	protein_coding	PDCD7	4.87242	3.2873	0	3.50457
ENSG00000090487	protein_coding	SPG21	30.7638	26.3081	37.6088	41.2731
ENSG00000090512	protein_coding	FETUB	0	0	0	0
ENSG00000090520	protein_coding	DNAJB11	59.9487	13.8927	2.61378	17.0129
ENSG00000090530	protein_coding	P3H2	11.1093	2.69746	2.68788	1.2206
ENSG00000090534	protein_coding	THPO	0.152842	0.535164	0	0
ENSG00000090539	protein_coding	CHRD	0.36691	4.28095	0	0
ENSG00000090554	protein_coding	FLT3LG	5.73814	4.32353	0	1.19508
ENSG00000090565	protein_coding	RAB11FIP3	4.11004	5.40216	0	0
ENSG00000090581	protein_coding	GNPTG	15.5266	15.3678	10.9767	1.93847
ENSG00000090612	protein_coding	ZNF268	1.07796	0.849287	0	0.32174
ENSG00000090615	protein_coding	GOLGA3	8.7293	4.5738	0	0.427218
ENSG00000090621	protein_coding	PABPC4	36.7975	29.3001	0	23.7378
ENSG00000090659	protein_coding	CD209	0.327827	1.03434	3.39365	1.79794
ENSG00000090661	protein_coding	CERS4	9.42175	4.12884	0	0.837938
ENSG00000090674	protein_coding	MCOLN1	8.17368	6.10513	0	0.85932
ENSG00000090686	protein_coding	USP48	6.85651	3.42965	0	0.477511
ENSG00000090776	protein_coding	EFNB1	45.7497	20.8854	4.53514	1.02973
ENSG00000090857	protein_coding	PDPR	5.73278	4.19794	1.44242	2.1834
ENSG00000090861	protein_coding	AARS1	40.0637	14.3465	6.66055	7.30951
ENSG00000090863	protein_coding	GLG1	11.1849	8.58582	0	1.76756
ENSG00000090889	protein_coding	KIF4A	0.0452041	0.0852271	0	0
ENSG00000090905	protein_coding	TNRC6A	4.51917	3.65803	0	0.961677
ENSG00000090924	protein_coding	PLEKHG2	10.6863	9.55242	0	3.23354
ENSG00000090932	protein_coding	DLL3	0.0394802	0	0	0
ENSG00000090971	protein_coding	NAT14	0.992332	2.61648	0	4.58304
ENSG00000090975	protein_coding	PITPNM2	3.39604	4.57042	0	0.495025
ENSG00000090989	protein_coding	EXOC1	10.8328	5.68499	2.79105	6.12599
ENSG00000091009	protein_coding	RBM27	6.80117	2.94096	6.7435	0.850638
ENSG00000091010	protein_coding	POU4F3	0.120418	0	0	0
ENSG00000091039	protein_coding	OSBPL8	5.53991	3.20821	0	5.05359
ENSG00000091073	protein_coding	DTX2	8.6816	1.95457	0	0
[truncated: 18,038 more rows]

## Sheet: lncRNA_COVID-19
Gene stable ID	Gene type	Gene name	SRX8089341	SRX8089342	SRX8089343	SRX8089344
[truncated: 16,882 more rows]

[truncated: 1 more sheets: Viral_Genes]
