# Supplementary material for: Protein Coding and Long Noncoding RNA (lncRNA) Transcriptional Landscape in SARS-CoV-2 Infected Bronchial Epithelial Cells Highlight a Role for Interferon and Inflammatory Response
Source: Genes (Basel). 2020 Jul 7;11(7):760. doi: 10.3390/genes11070760 (PMC7397219; doi:10.3390/genes11070760)
Supplement: Supplementary file 1 [file genes-11-00760-s001.zip › Supplementary table 2.xlsx]

## Sheet: GE.NHBE-SARS-CoV-2_vs_NHBE-mock
Supplementary table 2. Differentially expressed genes in SARS-CoV-2 infected vs control NHBE cells.
GeneID (Regulation criterion: fold > 2.0 and rawp p-value < 0.05)	Gene type	Gene name	NHBE-SARS-CoV-2_vs_NHBE-mock-log_fold	NHBE-SARS-CoV-2_vs_NHBE-mock-p_value
ENSG00000285283	protein_coding	AL035078.4	6.39023	1.98488e-08
ENSG00000280571	protein_coding	AC006059.2	5.90449	5.86533e-09
ENSG00000283149	protein_coding	AC068631.3	4.85158	0.0140211
ENSG00000281593	protein_coding	AC006978.2	4.8209	8.65687e-07
ENSG00000196136	protein_coding	SERPINA3	4.70346	0.000589796
ENSG00000259399	protein_coding	TGIF2-RAB5IF	4.66858	1.08373e-06
ENSG00000146674	protein_coding	IGFBP3	4.46049	3.69649e-07
ENSG00000255073	protein_coding	ZFP91-CNTF	4.36332	5.15749e-07
ENSG00000125730	protein_coding	C3	4.26617	5.7308e-07
ENSG00000284292	protein_coding	AC004922.1	3.96164	1.77435e-05
ENSG00000254673	protein_coding	AC110275.1	3.81271	6.01638e-05
ENSG00000090339	protein_coding	ICAM1	3.78711	9.80715e-08
ENSG00000281039	protein_coding	AC005154.5	3.76871	0.00137641
ENSG00000270276	protein_coding	H4C15	3.68082	9.27818e-07
ENSG00000156804	protein_coding	FBXO32	3.62212	6.52371e-08
ENSG00000228253	protein_coding	MT-ATP8	3.6114	6.04117e-05
ENSG00000173432	protein_coding	SAA1	3.61049	0.000394299
ENSG00000259132	protein_coding	AL132780.3	3.5896	0.00101745
ENSG00000282218	protein_coding	AL132671.2	3.56933	1.86525e-08
ENSG00000255071	protein_coding	SAA2-SAA4	3.49875	5.91599e-05
ENSG00000134339	protein_coding	SAA2	3.49524	3.66753e-05
ENSG00000272410	protein_coding	AC022384.1	3.43287	1.82736e-08
ENSG00000243649	protein_coding	CFB	3.33196	0.000106866
ENSG00000275493	protein_coding	AL627230.1	3.22819	0.00198494
ENSG00000100342	protein_coding	APOL1	3.20945	1.84921e-06
ENSG00000275740	protein_coding	AC091959.3	3.17676	0.000172751
ENSG00000198695	protein_coding	MT-ND6	3.15615	2.31685e-07
ENSG00000149131	protein_coding	SERPING1	3.15247	0.000289933
ENSG00000272822	protein_coding	AC073610.2	3.11523	5.69973e-06
ENSG00000275954	protein_coding	TBC1D3F	3.06987	1.12109e-05
ENSG00000250349	protein_coding	AF241726.2	3.00924	8.20671e-08
ENSG00000273173	protein_coding	SNURF	2.97119	0.00140579
ENSG00000285723	protein_coding	AL034430.2	2.90383	0.00483938
ENSG00000145113	protein_coding	MUC4	2.89222	4.26607e-06
ENSG00000128342	protein_coding	LIF	2.87687	1.24115e-05
ENSG00000258677	protein_coding	AC022826.2	2.79323	0.000544479
ENSG00000213886	protein_coding	UBD	2.752	6.72901e-06
ENSG00000115009	protein_coding	CCL20	2.73101	5.58601e-06
ENSG00000136244	protein_coding	IL6	2.716	0.000157645
ENSG00000254995	protein_coding	STX16-NPEPL1	2.68494	5.44748e-05
ENSG00000176907	protein_coding	TCIM	2.66786	7.33096e-05
ENSG00000267645	protein_coding	AC105052.3	2.63057	0.000816459
ENSG00000082074	protein_coding	FYB1	2.60515	1.95445e-05
ENSG00000159167	protein_coding	STC1	2.60333	1.01388e-06
ENSG00000265818	protein_coding	EEF1E1-BLOC1S5	2.59755	5.68934e-05
ENSG00000258830	protein_coding	AC137834.1	2.59185	0.000194153
ENSG00000273398	protein_coding	AC017083.3	2.58886	0.00540877
ENSG00000198786	protein_coding	MT-ND5	2.56025	8.33892e-06
ENSG00000215695	protein_coding	RSC1A1	2.54831	4.11541e-05
ENSG00000284526	protein_coding	AC015802.6	2.547	5.40758e-06
ENSG00000269897	protein_coding	COMMD3-BMI1	2.51753	0.00630309
ENSG00000157601	protein_coding	MX1	2.45304	9.60969e-07
ENSG00000169429	protein_coding	CXCL8	2.44923	3.15767e-07
ENSG00000080603	protein_coding	SRCAP	2.44019	0.00180517
ENSG00000288534	protein_coding	AP001931.2	2.40124	0.0447789
ENSG00000091986	protein_coding	CCDC80	2.3649	2.79379e-05
ENSG00000215126	protein_coding	CBWD6	2.35675	1.48147e-05
ENSG00000269026	protein_coding	AC003006.1	2.30488	0.000565245
ENSG00000255663	protein_coding	AP002373.1	2.25969	0.00702554
ENSG00000198183	protein_coding	BPIFA1	2.24372	7.78018e-05
ENSG00000111859	protein_coding	NEDD9	2.24252	3.67713e-06
ENSG00000267261	protein_coding	AC099811.2	2.23045	0.0083243
ENSG00000119922	protein_coding	IFIT2	2.18522	3.29132e-06
ENSG00000274419	protein_coding	TBC1D3D	2.14906	4.85711e-06
ENSG00000254979	protein_coding	AP000781.2	2.14056	0.000277018
ENSG00000249240	protein_coding	AC069368.1	2.13298	3.66065e-08
ENSG00000137745	protein_coding	MMP13	2.13082	0.000137188
ENSG00000156587	protein_coding	UBE2L6	2.11139	4.73962e-06
ENSG00000129538	protein_coding	RNASE1	2.08464	9.10243e-07
ENSG00000081041	protein_coding	CXCL2	2.07941	1.7978e-05
ENSG00000162552	protein_coding	WNT4	2.05924	0.000130386
ENSG00000273217	protein_coding	AC008695.1	2.05775	3.38796e-06
ENSG00000175164	protein_coding	ABO	2.01552	4.10417e-06
ENSG00000135925	protein_coding	WNT10A	2.00154	2.72739e-06
ENSG00000146411	protein_coding	SLC2A12	1.97938	2.93931e-06
ENSG00000198888	protein_coding	MT-ND1	1.97665	4.75193e-05
ENSG00000137965	protein_coding	IFI44	1.97365	0.000105941
ENSG00000198886	protein_coding	MT-ND4	1.9661	0.000810159
ENSG00000063180	protein_coding	CA11	1.96271	2.50325e-05
ENSG00000162496	protein_coding	DHRS3	1.94202	6.48937e-06
ENSG00000108848	protein_coding	LUC7L3	1.93303	5.91013e-06
ENSG00000173535	protein_coding	TNFRSF10C	1.93285	0.000363181
ENSG00000198763	protein_coding	MT-ND2	1.92829	0.000356304
ENSG00000115414	protein_coding	FN1	1.92645	5.08986e-06
ENSG00000136688	protein_coding	IL36G	1.91279	1.7762e-05
ENSG00000259207	protein_coding	ITGB3	1.90934	2.49081e-07
ENSG00000249773	protein_coding	AC092647.5	1.90858	0.00105764
ENSG00000198759	protein_coding	EGFL6	1.90791	4.24789e-06
ENSG00000023445	protein_coding	BIRC3	1.90583	5.22879e-05
ENSG00000122641	protein_coding	INHBA	1.9024	5.76695e-05
ENSG00000198157	protein_coding	HMGN5	1.89907	0.00342692
ENSG00000165949	protein_coding	IFI27	1.87689	0.000194648
ENSG00000047457	protein_coding	CP	1.87309	8.48355e-06
ENSG00000113369	protein_coding	ARRDC3	1.8728	0.0074695
ENSG00000137959	protein_coding	IFI44L	1.85474	2.44991e-05
ENSG00000132274	protein_coding	TRIM22	1.85335	0.0006103
ENSG00000008517	protein_coding	IL32	1.82972	0.000355882
ENSG00000055163	protein_coding	CYFIP2	1.82277	4.28996e-07
ENSG00000111674	protein_coding	ENO2	1.79939	0.000236974
ENSG00000198959	protein_coding	TGM2	1.79765	1.02773e-05
ENSG00000154040	protein_coding	CABYR	1.79491	1.04317e-05
ENSG00000132530	protein_coding	XAF1	1.78633	2.44804e-07
ENSG00000126709	protein_coding	IFI6	1.77335	0.00603806
ENSG00000077092	protein_coding	RARB	1.77242	9.82248e-05
ENSG00000064300	protein_coding	NGFR	1.76079	1.29898e-05
ENSG00000240065	protein_coding	PSMB9	1.75879	0.000149548
ENSG00000169249	protein_coding	ZRSR2	1.74406	3.18619e-05
ENSG00000198712	protein_coding	MT-CO2	1.74322	0.000216505
ENSG00000198899	protein_coding	MT-ATP6	1.73809	0.000542572
ENSG00000185650	protein_coding	ZFP36L1	1.73806	3.17798e-06
ENSG00000111215	protein_coding	PRR4	1.73372	0.00113829
ENSG00000170835	protein_coding	CEL	1.72429	5.42738e-06
ENSG00000198727	protein_coding	MT-CYB	1.71035	0.000222591
ENSG00000119917	protein_coding	IFIT3	1.70991	8.65101e-06
ENSG00000161955	protein_coding	TNFSF13	1.69965	3.58526e-06
ENSG00000181222	protein_coding	POLR2A	1.69784	0.000876244
ENSG00000285330	protein_coding	AC126283.2	1.69639	0.00119308
ENSG00000131016	protein_coding	AKAP12	1.69115	2.13049e-05
ENSG00000118503	protein_coding	TNFAIP3	1.68719	3.34214e-06
ENSG00000271741	protein_coding	AC114490.2	1.67643	0.00013641
ENSG00000118849	protein_coding	RARRES1	1.67319	7.21422e-05
ENSG00000101825	protein_coding	MXRA5	1.66052	0.00112924
ENSG00000123095	protein_coding	BHLHE41	1.64896	0.000160362
ENSG00000073605	protein_coding	GSDMB	1.63601	1.57668e-06
ENSG00000126653	protein_coding	NSRP1	1.61854	6.4292e-06
ENSG00000105559	protein_coding	PLEKHA4	1.6154	4.46432e-06
ENSG00000078081	protein_coding	LAMP3	1.6095	2.29984e-07
ENSG00000157765	protein_coding	SLC34A2	1.6083	8.16803e-05
ENSG00000173575	protein_coding	CHD2	1.60107	1.58015e-05
ENSG00000260916	protein_coding	CCPG1	1.58936	0.00258366
ENSG00000151882	protein_coding	CCL28	1.5889	1.80628e-05
ENSG00000162896	protein_coding	PIGR	1.58398	0.000192707
ENSG00000140379	protein_coding	BCL2A1	1.58175	0.000965865
ENSG00000129226	protein_coding	CD68	1.57888	0.000198565
ENSG00000151176	protein_coding	PLBD2	1.57649	2.84339e-05
ENSG00000101443	protein_coding	WFDC2	1.57643	0.00590899
ENSG00000132424	protein_coding	PNISR	1.57372	7.56517e-07
ENSG00000178115	protein_coding	GOLGA8Q	1.5642	9.75774e-05
ENSG00000167600	protein_coding	CYP2S1	1.56095	0.000151769
ENSG00000185745	protein_coding	IFIT1	1.56062	0.00163611
ENSG00000094755	protein_coding	GABRP	1.55579	0.000225524
ENSG00000235109	protein_coding	ZSCAN31	1.55138	3.62159e-05
ENSG00000153914	protein_coding	SREK1	1.54509	8.78918e-06
ENSG00000254870	protein_coding	ATP6V1G2-DDX39B	1.54491	0.000861691
ENSG00000173706	protein_coding	HEG1	1.53607	8.54583e-05
ENSG00000038427	protein_coding	VCAN	1.53443	6.17295e-05
ENSG00000113805	protein_coding	CNTN3	1.52879	8.88342e-05
ENSG00000105426	protein_coding	PTPRS	1.52872	5.38733e-05
ENSG00000182326	protein_coding	C1S	1.51936	5.05908e-06
ENSG00000176046	protein_coding	NUPR1	1.51285	0.000508582
ENSG00000165799	protein_coding	RNASE7	1.5127	6.69953e-05
ENSG00000100302	protein_coding	RASD2	1.51114	0.000148927
ENSG00000149021	protein_coding	SCGB1A1	1.50686	0.00112357
ENSG00000281348	protein_coding	AC120114.4	1.50662	7.21639e-05
ENSG00000184206	protein_coding	GOLGA6L4	1.50392	0.00110936
ENSG00000284776	protein_coding	AL121900.1	1.50241	0.000206249
ENSG00000250067	protein_coding	YJEFN3	1.50138	2.18118e-06
ENSG00000185215	protein_coding	TNFAIP2	1.50083	6.71214e-05
ENSG00000033327	protein_coding	GAB2	1.49797	1.68157e-06
ENSG00000168918	protein_coding	INPP5D	1.49714	8.85292e-05
ENSG00000111331	protein_coding	OAS3	1.49554	4.56297e-05
ENSG00000133142	protein_coding	TCEAL4	1.48846	1.37793e-05
ENSG00000128849	protein_coding	CGNL1	1.48313	1.44979e-06
ENSG00000104368	protein_coding	PLAT	1.48082	6.39056e-05
ENSG00000197608	protein_coding	ZNF841	1.47823	8.06057e-05
ENSG00000267022	protein_coding	AC067968.1	1.47821	0.00981346
ENSG00000258064	protein_coding	AC073612.1	1.47528	5.33388e-05
ENSG00000135365	protein_coding	PHF21A	1.47257	0.000319715
ENSG00000100918	protein_coding	REC8	1.47107	3.98695e-06
ENSG00000285000	protein_coding	AC008581.2	1.46708	0.0191816
ENSG00000254726	protein_coding	MEX3A	1.46174	2.65116e-06
ENSG00000137628	protein_coding	DDX60	1.45996	1.22646e-06
ENSG00000282936	protein_coding	AC004706.3	1.44793	0.000587294
ENSG00000249967	protein_coding	AL355315.1	1.4349	0.000120058
ENSG00000135373	protein_coding	EHF	1.4284	3.83618e-05
ENSG00000148346	protein_coding	LCN2	1.42819	0.000192089
ENSG00000176641	protein_coding	RNF152	1.42317	6.28249e-05
ENSG00000136235	protein_coding	GPNMB	1.42105	2.01064e-05
ENSG00000005483	protein_coding	KMT2E	1.4198	1.45721e-05
ENSG00000128335	protein_coding	APOL2	1.4168	1.25028e-06
ENSG00000145934	protein_coding	TENM2	1.41309	0.000213774
ENSG00000185885	protein_coding	IFITM1	1.41188	0.000124568
ENSG00000125735	protein_coding	TNFSF14	1.40802	5.80778e-07
ENSG00000117009	protein_coding	KMO	1.408	7.75608e-05
ENSG00000163734	protein_coding	CXCL3	1.40753	0.000170626
ENSG00000272414	protein_coding	FAM47E-STBD1	1.40227	0.0243986
ENSG00000254852	protein_coding	NPIPA2	1.40108	0.000351454
ENSG00000213928	protein_coding	IRF9	1.40076	1.8294e-06
ENSG00000185561	protein_coding	TLCD2	1.39933	2.73897e-06
ENSG00000269028	protein_coding	MTRNR2L12	1.39912	0.000259555
ENSG00000006606	protein_coding	CCL26	1.3991	0.00117118
ENSG00000149090	protein_coding	PAMR1	1.39503	3.07399e-05
ENSG00000184205	protein_coding	TSPYL2	1.39456	2.82784e-06
ENSG00000117523	protein_coding	PRRC2C	1.3852	1.92055e-05
ENSG00000255398	protein_coding	HCAR3	1.38212	0.000148926
ENSG00000214290	protein_coding	COLCA2	1.37951	2.50517e-05
ENSG00000227507	protein_coding	LTB	1.37733	0.00123642
ENSG00000170004	protein_coding	CHD3	1.37681	9.09491e-06
ENSG00000188559	protein_coding	RALGAPA2	1.37419	9.27634e-07
ENSG00000158373	protein_coding	H2BC5	1.37023	0.00128595
ENSG00000172058	protein_coding	SERF1A	1.36874	0.00299595
ENSG00000112299	protein_coding	VNN1	1.36781	9.77602e-06
ENSG00000137673	protein_coding	MMP7	1.36257	3.02181e-05
ENSG00000178947	protein_coding	SMIM10L2A	1.36121	0.000340812
ENSG00000257315	protein_coding	ZBED6	1.35714	0.00563069
ENSG00000163082	protein_coding	SGPP2	1.35708	0.000617961
ENSG00000176153	protein_coding	GPX2	1.35691	7.00858e-06
ENSG00000168386	protein_coding	FILIP1L	1.35605	0.000304879
ENSG00000283321	protein_coding	AC019117.4	1.35055	0.00558122
ENSG00000042980	protein_coding	ADAM28	1.34897	7.95619e-06
ENSG00000248672	protein_coding	LY75-CD302	1.34843	3.33298e-05
ENSG00000137868	protein_coding	STRA6	1.34688	6.55334e-05
ENSG00000112096	protein_coding	SOD2	1.34214	0.000182377
ENSG00000073849	protein_coding	ST6GAL1	1.33219	3.89532e-05
ENSG00000254505	protein_coding	CHMP4A	1.33168	1.24314e-05
ENSG00000172493	protein_coding	AFF1	1.32916	7.36295e-06
ENSG00000123200	protein_coding	ZC3H13	1.32157	3.38962e-06
ENSG00000204385	protein_coding	SLC44A4	1.3214	0.0143063
ENSG00000160973	protein_coding	FOXH1	1.32047	0.0375196
ENSG00000162738	protein_coding	VANGL2	1.3163	0.000901377
ENSG00000171992	protein_coding	SYNPO	1.30702	4.54262e-05
ENSG00000134186	protein_coding	PRPF38B	1.30499	2.55276e-05
ENSG00000117594	protein_coding	HSD11B1	1.30362	0.000102588
ENSG00000163735	protein_coding	CXCL5	1.29907	0.00461633
ENSG00000205238	protein_coding	SPDYE2	1.2946	0.000435075
ENSG00000167191	protein_coding	GPRC5B	1.29406	2.23283e-05
ENSG00000092421	protein_coding	SEMA6A	1.29019	4.98649e-05
ENSG00000139899	protein_coding	CBLN3	1.28907	1.17003e-05
ENSG00000177459	protein_coding	ERICH5	1.28634	0.000558814
ENSG00000136305	protein_coding	CIDEB	1.28068	0.000977699
ENSG00000173821	protein_coding	RNF213	1.2805	7.95592e-06
ENSG00000243279	protein_coding	PRAF2	1.27904	0.00066204
ENSG00000012822	protein_coding	CALCOCO1	1.26714	7.29711e-06
ENSG00000232810	protein_coding	TNF	1.26663	0.000658298
ENSG00000175274	protein_coding	TP53I11	1.2644	0.00585282
ENSG00000183111	protein_coding	ARHGEF37	1.26353	9.02761e-07
ENSG00000159648	protein_coding	TEPP	1.25993	4.52573e-05
ENSG00000270629	protein_coding	NBPF14	1.25383	1.13306e-05
ENSG00000113578	protein_coding	FGF1	1.25316	4.61893e-05
ENSG00000120594	protein_coding	PLXDC2	1.25196	1.14692e-05
ENSG00000173193	protein_coding	PARP14	1.25145	5.46392e-06
ENSG00000153774	protein_coding	CFDP1	1.25006	6.93266e-05
ENSG00000130303	protein_coding	BST2	1.23956	0.005106
ENSG00000153291	protein_coding	SLC25A27	1.23048	0.000321983
ENSG00000102401	protein_coding	ARMCX3	1.23026	0.00127835
ENSG00000133226	protein_coding	SRRM1	1.22502	1.23236e-05
ENSG00000241468	protein_coding	ATP5MF	1.22427	0.000168404
ENSG00000102189	protein_coding	EEA1	1.22067	5.08061e-05
ENSG00000198848	protein_coding	CES1	1.21697	0.0357429
ENSG00000198938	protein_coding	MT-CO3	1.21556	0.00026316
ENSG00000071054	protein_coding	MAP4K4	1.21379	3.1822e-05
ENSG00000117228	protein_coding	GBP1	1.21308	2.16103e-05
ENSG00000119707	protein_coding	RBM25	1.21228	3.02454e-05
ENSG00000188766	protein_coding	SPRED3	1.21061	0.000503882
ENSG00000124508	protein_coding	BTN2A2	1.20802	2.76966e-06
ENSG00000026950	protein_coding	BTN3A1	1.2071	0.000482215
ENSG00000109790	protein_coding	KLHL5	1.20695	2.78974e-06
ENSG00000136451	protein_coding	VEZF1	1.20338	9.30768e-05
ENSG00000177076	protein_coding	ACER2	1.20321	0.000784831
ENSG00000067141	protein_coding	NEO1	1.20067	0.00288871
ENSG00000182310	protein_coding	SPACA6	1.19977	0.000647836
ENSG00000101040	protein_coding	ZMYND8	1.19698	4.09829e-06
ENSG00000166949	protein_coding	SMAD3	1.19373	0.000125927
ENSG00000110852	protein_coding	CLEC2B	1.19316	0.0167266
ENSG00000100028	protein_coding	SNRPD3	1.18391	3.38651e-06
ENSG00000214814	protein_coding	FER1L6	1.18215	3.68502e-05
ENSG00000088367	protein_coding	EPB41L1	1.1814	5.46914e-06
ENSG00000243811	protein_coding	APOBEC3D	1.18099	0.000255799
ENSG00000100906	protein_coding	NFKBIA	1.17395	0.0062742
ENSG00000158315	protein_coding	RHBDL2	1.17051	3.19973e-06
ENSG00000123384	protein_coding	LRP1	1.1664	0.000398933
ENSG00000267303	protein_coding	AC011511.4	1.16563	0.00320497
ENSG00000167996	protein_coding	FTH1	1.16277	2.7013e-06
ENSG00000205744	protein_coding	DENND1C	1.16244	2.38532e-06
ENSG00000165813	protein_coding	CCDC186	1.16041	0.000512745
ENSG00000198840	protein_coding	MT-ND3	1.15546	0.00966266
ENSG00000167080	protein_coding	B4GALNT2	1.15275	2.55325e-06
ENSG00000163840	protein_coding	DTX3L	1.1459	1.27567e-05
ENSG00000271605	protein_coding	MILR1	1.14574	0.00014098
ENSG00000266086	protein_coding	AC015813.2	1.14242	0.00254367
ENSG00000092969	protein_coding	TGFB2	1.13879	0.000404675
ENSG00000107863	protein_coding	ARHGAP21	1.13805	9.63772e-06
ENSG00000053438	protein_coding	NNAT	1.13741	0.0103903
ENSG00000102359	protein_coding	SRPX2	1.13074	2.06819e-05
ENSG00000163617	protein_coding	CCDC191	1.12957	5.70085e-05
ENSG00000135976	protein_coding	ANKRD36	1.12897	4.24079e-06
ENSG00000167244	protein_coding	IGF2	1.12799	0.00685793
ENSG00000110195	protein_coding	FOLR1	1.12629	2.00448e-05
ENSG00000169403	protein_coding	PTAFR	1.12506	0.000319641
ENSG00000164985	protein_coding	PSIP1	1.12485	0.00685875
ENSG00000117266	protein_coding	CDK18	1.12357	0.00314398
ENSG00000106261	protein_coding	ZKSCAN1	1.12273	1.45333e-05
ENSG00000152818	protein_coding	UTRN	1.12152	2.76984e-06
ENSG00000221963	protein_coding	APOL6	1.12031	7.51917e-05
ENSG00000213214	protein_coding	ARHGEF35	1.12006	2.08126e-05
ENSG00000100941	protein_coding	PNN	1.11944	5.57933e-05
ENSG00000196507	protein_coding	TCEAL3	1.1192	0.00111898
ENSG00000188818	protein_coding	ZDHHC11	1.1178	4.22869e-05
ENSG00000159403	protein_coding	C1R	1.11398	7.69994e-05
ENSG00000173391	protein_coding	OLR1	1.11236	0.000355957
ENSG00000121769	protein_coding	FABP3	1.11224	2.83328e-06
ENSG00000135821	protein_coding	GLUL	1.10848	4.47899e-06
ENSG00000055609	protein_coding	KMT2C	1.10645	0.000423017
ENSG00000138496	protein_coding	PARP9	1.10574	5.46573e-05
ENSG00000165092	protein_coding	ALDH1A1	1.10472	0.000802685
ENSG00000124177	protein_coding	CHD6	1.1045	4.01144e-05
ENSG00000138131	protein_coding	LOXL4	1.10253	0.00118027
ENSG00000148773	protein_coding	MKI67	1.10211	0.0415957
ENSG00000157625	protein_coding	TAB3	1.10158	0.00037606
ENSG00000214021	protein_coding	TTLL3	1.1006	3.69501e-06
ENSG00000165507	protein_coding	DEPP1	1.09979	0.00195453
ENSG00000176293	protein_coding	ZNF135	1.09753	5.31029e-05
ENSG00000265590	protein_coding	C21orf59-TCP10L	1.09664	0.000546659
ENSG00000182179	protein_coding	UBA7	1.09645	0.00258768
ENSG00000249624	protein_coding	AP000295.1	1.09473	0.00491384
ENSG00000172361	protein_coding	CFAP53	1.09321	0.00757128
ENSG00000144802	protein_coding	NFKBIZ	1.09148	0.00806574
ENSG00000139112	protein_coding	GABARAPL1	1.08926	1.47126e-05
ENSG00000283765	protein_coding	AC131160.1	1.08866	1.80105e-06
ENSG00000065526	protein_coding	SPEN	1.08824	0.00130907
ENSG00000170231	protein_coding	FABP6	1.08545	0.00506344
ENSG00000163218	protein_coding	PGLYRP4	1.08491	0.000962288
ENSG00000198804	protein_coding	MT-CO1	1.08179	0.000317694
ENSG00000154274	protein_coding	C4orf19	1.07461	0.000774693
ENSG00000065320	protein_coding	NTN1	1.07419	0.00116749
ENSG00000198074	protein_coding	AKR1B10	1.07388	0.0198588
ENSG00000137648	protein_coding	TMPRSS4	1.07359	2.97567e-05
ENSG00000177025	protein_coding	C19orf18	1.07249	0.000387081
ENSG00000131711	protein_coding	MAP1B	1.06795	0.000533972
ENSG00000184371	protein_coding	CSF1	1.06766	0.000853647
ENSG00000263639	protein_coding	MSMB	1.06331	0.0164771
ENSG00000273155	protein_coding	AC092587.1	1.06322	0.00702233
ENSG00000125351	protein_coding	UPF3B	1.06129	6.9389e-05
ENSG00000141968	protein_coding	VAV1	1.06116	1.99929e-05
ENSG00000070731	protein_coding	ST6GALNAC2	1.05958	6.13692e-05
ENSG00000169435	protein_coding	RASSF6	1.05872	0.000248236
ENSG00000140274	protein_coding	DUOXA2	1.05777	0.00106856
ENSG00000180357	protein_coding	ZNF609	1.05556	0.00122059
ENSG00000169992	protein_coding	NLGN2	1.0543	0.000112801
ENSG00000107731	protein_coding	UNC5B	1.05386	0.000394946
ENSG00000154310	protein_coding	TNIK	1.05256	6.77004e-05
ENSG00000170921	protein_coding	TANC2	1.05243	4.11034e-05
ENSG00000111335	protein_coding	OAS2	1.05122	9.16439e-05
ENSG00000128394	protein_coding	APOBEC3F	1.04604	0.0022033
ENSG00000168016	protein_coding	TRANK1	1.04302	1.93564e-05
ENSG00000170581	protein_coding	STAT2	1.04087	3.84246e-06
ENSG00000078725	protein_coding	BRINP1	1.03878	0.000775144
ENSG00000137496	protein_coding	IL18BP	1.03755	0.000155056
ENSG00000137462	protein_coding	TLR2	1.0371	0.00935368
ENSG00000170954	protein_coding	ZNF415	1.03675	0.000712274
ENSG00000121858	protein_coding	TNFSF10	1.03598	3.43823e-05
ENSG00000130540	protein_coding	SULT4A1	1.0359	0.0110207
ENSG00000141027	protein_coding	NCOR1	1.03563	0.000168175
ENSG00000136048	protein_coding	DRAM1	1.03485	0.00176221
ENSG00000166828	protein_coding	SCNN1G	1.03229	0.000169622
ENSG00000151623	protein_coding	NR3C2	1.03153	0.000135489
ENSG00000170271	protein_coding	FAXDC2	1.03105	3.03428e-05
ENSG00000161664	protein_coding	ASB16	1.02861	0.00200972
ENSG00000134744	protein_coding	TUT4	1.0266	1.25879e-05
ENSG00000204531	protein_coding	POU5F1	1.02439	6.46981e-05
ENSG00000086570	protein_coding	FAT2	1.02342	0.00241791
ENSG00000092199	protein_coding	HNRNPC	1.02251	5.39779e-05
ENSG00000284946	protein_coding	AC068831.8	1.02248	0.00520374
ENSG00000083223	protein_coding	TUT7	1.02197	8.89305e-05
ENSG00000106546	protein_coding	AHR	1.02025	9.2953e-05
ENSG00000159023	protein_coding	EPB41	1.01724	4.27356e-05
ENSG00000185100	protein_coding	ADSS1	1.01672	1.6884e-05
ENSG00000261732	protein_coding	AL031708.1	1.01556	9.41037e-06
ENSG00000130684	protein_coding	ZNF337	1.01368	2.58887e-05
ENSG00000121851	protein_coding	POLR3GL	1.01361	0.000137694
ENSG00000159208	protein_coding	CIART	1.01083	0.00443256
ENSG00000111199	protein_coding	TRPV4	1.00639	0.00290895
ENSG00000118482	protein_coding	PHF3	1.00628	4.7437e-05
ENSG00000134070	protein_coding	IRAK2	1.0051	0.000142984
ENSG00000196209	protein_coding	SIRPB2	1.00503	4.64033e-05
ENSG00000187689	protein_coding	AMTN	1.00463	0.000195146
ENSG00000019995	protein_coding	ZRANB1	1.00394	0.00170755
ENSG00000177830	protein_coding	CHID1	-1.00004	0.000188406
ENSG00000130520	protein_coding	LSM4	-1.00065	0.000803911
ENSG00000053371	protein_coding	AKR7A2	-1.00076	3.25667e-05
ENSG00000123975	protein_coding	CKS2	-1.00085	0.00151433
ENSG00000123297	protein_coding	TSFM	-1.00088	6.72253e-05
ENSG00000177595	protein_coding	PIDD1	-1.00133	0.000791349
ENSG00000123552	protein_coding	USP45	-1.00161	0.00108962
ENSG00000086475	protein_coding	SEPHS1	-1.0018	3.39191e-06
ENSG00000101363	protein_coding	MANBAL	-1.00272	2.33393e-05
ENSG00000107521	protein_coding	HPS1	-1.00274	0.000163801
ENSG00000161395	protein_coding	PGAP3	-1.00314	0.000734516
ENSG00000169026	protein_coding	SLC49A3	-1.00317	0.00200878
ENSG00000158987	protein_coding	RAPGEF6	-1.00332	0.00025281
ENSG00000008988	protein_coding	RPS20	-1.00339	3.63197e-05
ENSG00000146802	protein_coding	TMEM168	-1.00359	0.0014141
ENSG00000155254	protein_coding	MARVELD1	-1.00359	4.83821e-05
ENSG00000125430	protein_coding	HS3ST3B1	-1.00371	0.00272994
ENSG00000007384	protein_coding	RHBDF1	-1.0044	0.000898342
ENSG00000179304	protein_coding	FAM156B	-1.00453	0.0243983
ENSG00000099814	protein_coding	CEP170B	-1.00478	0.00211093
ENSG00000076662	protein_coding	ICAM3	-1.0049	0.00436966
ENSG00000127824	protein_coding	TUBA4A	-1.00502	8.63414e-05
ENSG00000123562	protein_coding	MORF4L2	-1.00517	0.00147885
ENSG00000117751	protein_coding	PPP1R8	-1.00527	0.000146047
ENSG00000198912	protein_coding	C1orf174	-1.00546	7.30723e-06
ENSG00000185024	protein_coding	BRF1	-1.00558	0.000159093
ENSG00000089876	protein_coding	DHX32	-1.00572	0.000141147
ENSG00000132481	protein_coding	TRIM47	-1.00582	0.00275047
ENSG00000123159	protein_coding	GIPC1	-1.00609	0.000567503
ENSG00000099999	protein_coding	RNF215	-1.0062	0.000183381
ENSG00000228049	protein_coding	POLR2J2	-1.00627	0.0109297
ENSG00000143179	protein_coding	UCK2	-1.00636	1.86583e-05
ENSG00000165078	protein_coding	CPA6	-1.00641	0.00530298
ENSG00000156873	protein_coding	PHKG2	-1.00658	0.00045264
ENSG00000145220	protein_coding	LYAR	-1.00789	4.47056e-05
ENSG00000086598	protein_coding	TMED2	-1.00797	9.7411e-05
ENSG00000105887	protein_coding	MTPN	-1.00826	0.00683787
ENSG00000134330	protein_coding	IAH1	-1.00864	0.000254642
ENSG00000132207	protein_coding	SLX1A	-1.00883	0.00828362
ENSG00000181444	protein_coding	ZNF467	-1.0089	0.00178266
ENSG00000180822	protein_coding	PSMG4	-1.00905	0.000108761
ENSG00000143013	protein_coding	LMO4	-1.00949	0.000111356
ENSG00000185015	protein_coding	CA13	-1.01044	0.00758168
ENSG00000174839	protein_coding	DENND6A	-1.01091	0.000590658
ENSG00000081087	protein_coding	OSTM1	-1.01093	0.00555995
ENSG00000154511	protein_coding	DIPK1A	-1.01112	0.000869878
ENSG00000112335	protein_coding	SNX3	-1.01118	0.0063855
ENSG00000136279	protein_coding	DBNL	-1.01121	9.26755e-05
ENSG00000188846	protein_coding	RPL14	-1.01165	2.99007e-05
ENSG00000180879	protein_coding	SSR4	-1.01166	0.000311874
ENSG00000176222	protein_coding	ZNF404	-1.01199	0.0108838
ENSG00000163468	protein_coding	CCT3	-1.01203	3.47806e-05
ENSG00000134480	protein_coding	CCNH	-1.01217	0.000425355
ENSG00000177352	protein_coding	CCDC71	-1.01241	0.00198461
ENSG00000171566	protein_coding	PLRG1	-1.01249	0.000470573
ENSG00000105552	protein_coding	BCAT2	-1.01255	6.30564e-05
ENSG00000227057	protein_coding	WDR46	-1.01256	1.31414e-05
ENSG00000144182	protein_coding	LIPT1	-1.01265	0.00576444
ENSG00000170417	protein_coding	TMEM182	-1.01273	0.00216003
ENSG00000163993	protein_coding	S100P	-1.01285	5.42749e-05
ENSG00000155868	protein_coding	MED7	-1.01301	0.0075845
ENSG00000161939	protein_coding	RNASEK-C17orf49	-1.01312	0.0300208
ENSG00000120963	protein_coding	ZNF706	-1.01336	2.50995e-05
ENSG00000112759	protein_coding	SLC29A1	-1.01338	0.00232953
ENSG00000037474	protein_coding	NSUN2	-1.01345	0.00041851
ENSG00000113460	protein_coding	BRIX1	-1.01345	0.00124874
ENSG00000188917	protein_coding	TRMT2B	-1.01359	5.97282e-05
ENSG00000113597	protein_coding	TRAPPC13	-1.01396	0.00447601
ENSG00000164305	protein_coding	CASP3	-1.014	0.00181394
ENSG00000165475	protein_coding	CRYL1	-1.01408	8.74959e-05
ENSG00000198951	protein_coding	NAGA	-1.01412	0.000649631
ENSG00000115073	protein_coding	ACTR1B	-1.01429	0.000148368
ENSG00000204977	protein_coding	TRIM13	-1.01432	0.00226476
ENSG00000206503	protein_coding	HLA-A	-1.01443	0.00109506
ENSG00000138279	protein_coding	ANXA7	-1.01457	9.11899e-05
ENSG00000187325	protein_coding	TAF9B	-1.01527	0.00518768
ENSG00000173715	protein_coding	C11orf80	-1.01582	9.23523e-06
ENSG00000137962	protein_coding	ARHGAP29	-1.01619	0.0026066
ENSG00000185480	protein_coding	PARPBP	-1.01624	0.00171065
ENSG00000132376	protein_coding	INPP5K	-1.01639	6.3422e-05
ENSG00000254901	protein_coding	BORCS8	-1.01643	0.000255811
ENSG00000157020	protein_coding	SEC13	-1.01656	3.69237e-05
ENSG00000154914	protein_coding	USP43	-1.01664	2.55105e-05
ENSG00000105379	protein_coding	ETFB	-1.01698	0.00125256
ENSG00000117758	protein_coding	STX12	-1.01718	0.00307112
ENSG00000144580	protein_coding	CNOT9	-1.01723	0.000248979
ENSG00000078668	protein_coding	VDAC3	-1.0173	2.9258e-05
ENSG00000120820	protein_coding	GLT8D2	-1.01738	0.000641203
ENSG00000184743	protein_coding	ATL3	-1.01749	0.000545669
ENSG00000173599	protein_coding	PC	-1.01761	0.00259632
ENSG00000184470	protein_coding	TXNRD2	-1.01805	0.000516074
ENSG00000136908	protein_coding	DPM2	-1.01808	0.000263694
ENSG00000134987	protein_coding	WDR36	-1.01827	0.00223298
ENSG00000079616	protein_coding	KIF22	-1.01876	0.000698705
ENSG00000137767	protein_coding	SQOR	-1.01901	0.000189404
ENSG00000100601	protein_coding	ALKBH1	-1.01922	7.94756e-05
ENSG00000114626	protein_coding	ABTB1	-1.01936	0.000270157
ENSG00000165684	protein_coding	SNAPC4	-1.01982	0.0016125
ENSG00000121152	protein_coding	NCAPH	-1.01994	0.0286641
ENSG00000121542	protein_coding	SEC22A	-1.02016	0.00135584
ENSG00000166394	protein_coding	CYB5R2	-1.02022	6.27602e-05
ENSG00000107816	protein_coding	LZTS2	-1.0208	4.52051e-05
ENSG00000158435	protein_coding	CNOT11	-1.02099	0.000156528
ENSG00000119661	protein_coding	DNAL1	-1.0212	0.000569801
ENSG00000184402	protein_coding	SS18L1	-1.02143	0.00150206
ENSG00000139687	protein_coding	RB1	-1.02147	0.000845841
ENSG00000196408	protein_coding	NOXO1	-1.02167	0.013317
ENSG00000127191	protein_coding	TRAF2	-1.02175	0.000177113
ENSG00000115425	protein_coding	PECR	-1.02208	9.49242e-05
ENSG00000166938	protein_coding	DIS3L	-1.02242	0.00029074
ENSG00000104823	protein_coding	ECH1	-1.02242	0.000564375
ENSG00000136807	protein_coding	CDK9	-1.02269	0.000421675
ENSG00000230989	protein_coding	HSBP1	-1.02271	0.000523886
ENSG00000177042	protein_coding	TMEM80	-1.02271	1.3445e-05
ENSG00000114978	protein_coding	MOB1A	-1.02283	8.27356e-05
ENSG00000225697	protein_coding	SLC26A6	-1.02286	1.79957e-05
ENSG00000175087	protein_coding	PDIK1L	-1.02291	0.0025765
ENSG00000168884	protein_coding	TNIP2	-1.02339	6.01658e-05
ENSG00000065328	protein_coding	MCM10	-1.0234	0.020752
ENSG00000145022	protein_coding	TCTA	-1.02365	8.52925e-05
ENSG00000137106	protein_coding	GRHPR	-1.02379	9.55721e-05
ENSG00000205078	protein_coding	SYCE1L	-1.02384	0.00256042
ENSG00000162980	protein_coding	ARL5A	-1.02387	0.00457305
ENSG00000103485	protein_coding	QPRT	-1.02396	0.00018433
ENSG00000167674	protein_coding	HDGFL2	-1.02436	0.000455803
ENSG00000161647	protein_coding	MPP3	-1.02439	4.22268e-06
ENSG00000144401	protein_coding	METTL21A	-1.02462	1.80351e-05
ENSG00000166352	protein_coding	C11orf74	-1.0247	0.000179019
ENSG00000114956	protein_coding	DGUOK	-1.02471	9.86043e-06
ENSG00000119630	protein_coding	PGF	-1.02472	0.000693253
ENSG00000169957	protein_coding	ZNF768	-1.02503	0.000669048
ENSG00000272398	protein_coding	CD24	-1.02503	0.000292507
ENSG00000078808	protein_coding	SDF4	-1.02516	0.00140116
ENSG00000153395	protein_coding	LPCAT1	-1.02552	6.05438e-06
ENSG00000115163	protein_coding	CENPA	-1.02567	0.0100765
ENSG00000115841	protein_coding	RMDN2	-1.02574	0.00503435
ENSG00000164134	protein_coding	NAA15	-1.02577	0.00363796
ENSG00000136810	protein_coding	TXN	-1.02609	0.000662438
ENSG00000109911	protein_coding	ELP4	-1.02628	0.000366901
ENSG00000104529	protein_coding	EEF1D	-1.02641	0.00173152
ENSG00000224712	protein_coding	NPIPA3	-1.02674	0.0491999
ENSG00000170430	protein_coding	MGMT	-1.02695	0.00194681
ENSG00000155366	protein_coding	RHOC	-1.02739	4.83457e-05
ENSG00000232838	protein_coding	PET117	-1.02739	0.00617372
ENSG00000204435	protein_coding	CSNK2B	-1.02744	0.000137793
ENSG00000205937	protein_coding	RNPS1	-1.02746	3.13212e-05
ENSG00000196776	protein_coding	CD47	-1.02753	0.00120187
ENSG00000124664	protein_coding	SPDEF	-1.02813	0.00121658
ENSG00000063244	protein_coding	U2AF2	-1.02815	4.07764e-05
ENSG00000105197	protein_coding	TIMM50	-1.02824	6.75706e-06
ENSG00000143256	protein_coding	PFDN2	-1.02829	7.30988e-06
ENSG00000169660	protein_coding	HEXD	-1.0283	0.00157798
ENSG00000085719	protein_coding	CPNE3	-1.02844	0.000827552
ENSG00000010244	protein_coding	ZNF207	-1.02874	1.74263e-05
ENSG00000169372	protein_coding	CRADD	-1.02963	0.00043976
ENSG00000141526	protein_coding	SLC16A3	-1.03054	0.00290854
ENSG00000213906	protein_coding	LTB4R2	-1.03073	1.60112e-05
ENSG00000172818	protein_coding	OVOL1	-1.03082	0.000141135
ENSG00000147679	protein_coding	UTP23	-1.03142	0.00386748
ENSG00000172244	protein_coding	C5orf34	-1.03172	0.000199867
ENSG00000136936	protein_coding	XPA	-1.03179	4.20916e-05
ENSG00000140374	protein_coding	ETFA	-1.03256	0.0120894
ENSG00000107262	protein_coding	BAG1	-1.03256	0.000212548
ENSG00000173085	protein_coding	COQ2	-1.03311	0.000223101
ENSG00000060491	protein_coding	OGFR	-1.03324	0.0010339
ENSG00000213780	protein_coding	GTF2H4	-1.03348	4.17707e-05
ENSG00000087053	protein_coding	MTMR2	-1.03352	0.00153488
ENSG00000163291	protein_coding	PAQR3	-1.03363	0.00511654
ENSG00000164258	protein_coding	NDUFS4	-1.03368	7.68536e-05
ENSG00000187678	protein_coding	SPRY4	-1.03404	0.000276938
ENSG00000197586	protein_coding	ENTPD6	-1.03409	9.26943e-05
ENSG00000115107	protein_coding	STEAP3	-1.03421	2.23834e-05
ENSG00000147687	protein_coding	TATDN1	-1.03465	0.00105266
ENSG00000067704	protein_coding	IARS2	-1.03471	0.000437473
ENSG00000180694	protein_coding	TMEM64	-1.03475	0.00666915
ENSG00000110442	protein_coding	COMMD9	-1.03484	5.26441e-05
ENSG00000112514	protein_coding	CUTA	-1.035	3.58106e-05
ENSG00000181027	protein_coding	FKRP	-1.0352	6.23278e-05
ENSG00000105373	protein_coding	NOP53	-1.03521	2.946e-05
ENSG00000102243	protein_coding	VGLL1	-1.03523	0.000260116
ENSG00000144867	protein_coding	SRPRB	-1.03555	0.00053524
ENSG00000160226	protein_coding	CFAP410	-1.0357	0.000132804
ENSG00000163930	protein_coding	BAP1	-1.0358	0.000237071
ENSG00000171453	protein_coding	POLR1C	-1.03589	0.00129877
ENSG00000155542	protein_coding	SETD9	-1.0359	1.27e-05
ENSG00000149657	protein_coding	LSM14B	-1.03596	7.99942e-05
ENSG00000108651	protein_coding	UTP6	-1.03599	0.00104209
ENSG00000146826	protein_coding	MAP11	-1.036	7.20604e-05
ENSG00000198937	protein_coding	CCDC167	-1.03604	0.000165504
ENSG00000158106	protein_coding	RHPN1	-1.03629	0.00266161
ENSG00000071564	protein_coding	TCF3	-1.03631	0.000910961
ENSG00000134262	protein_coding	AP4B1	-1.0368	9.47768e-05
ENSG00000113068	protein_coding	PFDN1	-1.03693	8.90694e-06
ENSG00000156265	protein_coding	MAP3K7CL	-1.03695	0.000293203
ENSG00000183578	protein_coding	TNFAIP8L3	-1.03702	0.0014934
ENSG00000221926	protein_coding	TRIM16	-1.03713	5.7741e-05
ENSG00000144736	protein_coding	SHQ1	-1.03748	4.78918e-06
ENSG00000167470	protein_coding	MIDN	-1.0377	0.000170769
ENSG00000229117	protein_coding	RPL41	-1.03798	0.000381776
ENSG00000205220	protein_coding	PSMB10	-1.03818	0.00277258
ENSG00000203667	protein_coding	COX20	-1.03845	7.53171e-05
ENSG00000136280	protein_coding	CCM2	-1.03871	1.12677e-05
ENSG00000115170	protein_coding	ACVR1	-1.03906	4.87954e-05
ENSG00000218739	protein_coding	CEBPZOS	-1.03917	0.00386589
ENSG00000259511	protein_coding	UBE2Q2L	-1.03958	0.000597041
ENSG00000138031	protein_coding	ADCY3	-1.03967	0.000463165
ENSG00000071243	protein_coding	ING3	-1.03968	0.000106347
ENSG00000122741	protein_coding	DCAF10	-1.04102	5.14683e-05
ENSG00000155097	protein_coding	ATP6V1C1	-1.04142	0.00256385
ENSG00000144579	protein_coding	CTDSP1	-1.04144	0.000102072
ENSG00000117155	protein_coding	SSX2IP	-1.04157	0.000143257
ENSG00000100983	protein_coding	GSS	-1.04205	5.10823e-06
ENSG00000255302	protein_coding	EID1	-1.0424	0.00725162
ENSG00000141524	protein_coding	TMC6	-1.04264	0.00126294
ENSG00000254858	protein_coding	MPV17L2	-1.04317	0.000231398
ENSG00000115289	protein_coding	PCGF1	-1.04322	0.000104401
ENSG00000100554	protein_coding	ATP6V1D	-1.04362	0.000918139
ENSG00000111196	protein_coding	MAGOHB	-1.0439	0.00060186
ENSG00000064961	protein_coding	HMG20B	-1.04453	0.00188447
ENSG00000177156	protein_coding	TALDO1	-1.04465	6.73376e-05
ENSG00000171314	protein_coding	PGAM1	-1.04467	0.000101107
ENSG00000113643	protein_coding	RARS1	-1.04471	0.000517394
ENSG00000179115	protein_coding	FARSA	-1.0448	0.000314615
ENSG00000131373	protein_coding	HACL1	-1.04489	4.7466e-06
ENSG00000167770	protein_coding	OTUB1	-1.04513	6.41877e-05
ENSG00000114450	protein_coding	GNB4	-1.04536	0.00249861
ENSG00000006744	protein_coding	ELAC2	-1.04542	1.28206e-05
ENSG00000156990	protein_coding	RPUSD3	-1.04553	4.95745e-06
ENSG00000124217	protein_coding	MOCS3	-1.04564	0.00129344
ENSG00000100239	protein_coding	PPP6R2	-1.04601	0.000487859
ENSG00000176842	protein_coding	IRX5	-1.04625	0.00249175
ENSG00000114391	protein_coding	RPL24	-1.04647	6.55074e-06
ENSG00000170854	protein_coding	RIOX2	-1.04654	0.000191568
ENSG00000090316	protein_coding	MAEA	-1.0467	0.000139332
ENSG00000148450	protein_coding	MSRB2	-1.04706	0.00027194
ENSG00000095209	protein_coding	TMEM38B	-1.04735	0.00168035
ENSG00000039650	protein_coding	PNKP	-1.04755	4.62925e-05
ENSG00000116747	protein_coding	RO60	-1.04762	0.00288442
ENSG00000136450	protein_coding	SRSF1	-1.04852	0.000292653
ENSG00000184182	protein_coding	UBE2F	-1.04858	0.00163174
ENSG00000198719	protein_coding	DLL1	-1.04866	0.000175048
ENSG00000163389	protein_coding	POGLUT1	-1.04872	0.000506268
ENSG00000152234	protein_coding	ATP5F1A	-1.04873	0.000120057
ENSG00000185442	protein_coding	FAM174B	-1.04883	0.000117895
ENSG00000172458	protein_coding	IL17D	-1.04919	0.000170531
ENSG00000029153	protein_coding	ARNTL2	-1.04936	0.00217647
ENSG00000127054	protein_coding	INTS11	-1.04939	0.000299775
ENSG00000124786	protein_coding	SLC35B3	-1.04971	0.0286157
ENSG00000135521	protein_coding	LTV1	-1.05023	4.82547e-05
ENSG00000145365	protein_coding	TIFA	-1.05023	0.000472899
ENSG00000167842	protein_coding	MIS12	-1.05025	0.000121867
ENSG00000109501	protein_coding	WFS1	-1.0503	0.00138888
ENSG00000105948	protein_coding	TTC26	-1.05033	0.000474747
ENSG00000103148	protein_coding	NPRL3	-1.05033	0.000914504
ENSG00000168496	protein_coding	FEN1	-1.05088	0.000182204
ENSG00000166670	protein_coding	MMP10	-1.05102	0.000314218
ENSG00000164920	protein_coding	OSR2	-1.05145	6.14196e-05
ENSG00000169230	protein_coding	PRELID1	-1.05149	2.9252e-05
ENSG00000087152	protein_coding	ATXN7L3	-1.05158	1.85235e-05
ENSG00000160570	protein_coding	DEDD2	-1.05178	2.73468e-05
ENSG00000116701	protein_coding	NCF2	-1.05184	3.44897e-05
ENSG00000166822	protein_coding	TMEM170A	-1.05217	0.000214945
ENSG00000160439	protein_coding	RDH13	-1.05222	0.000149906
ENSG00000101935	protein_coding	AMMECR1	-1.05224	0.000482238
ENSG00000141858	protein_coding	SAMD1	-1.05239	2.93487e-05
ENSG00000169750	protein_coding	RAC3	-1.05241	0.000770296
ENSG00000130560	protein_coding	UBAC1	-1.0527	1.15018e-05
ENSG00000129317	protein_coding	PUS7L	-1.05283	0.0016127
ENSG00000257390	protein_coding	AC023055.1	-1.05288	0.0331222
ENSG00000141542	protein_coding	RAB40B	-1.05309	6.17616e-05
ENSG00000005812	protein_coding	FBXL3	-1.05314	0.00382496
ENSG00000144959	protein_coding	NCEH1	-1.05359	2.46955e-05
ENSG00000064763	protein_coding	FAR2	-1.054	0.000403735
ENSG00000145386	protein_coding	CCNA2	-1.05415	8.45294e-05
ENSG00000273899	protein_coding	NOL12	-1.05429	0.000126529
ENSG00000012171	protein_coding	SEMA3B	-1.05467	2.48092e-05
ENSG00000151093	protein_coding	OXSM	-1.05476	0.00136584
ENSG00000182712	protein_coding	CMC4	-1.0548	0.00221926
ENSG00000099949	protein_coding	LZTR1	-1.05496	0.00153964
ENSG00000106266	protein_coding	SNX8	-1.05514	0.000153689
ENSG00000113140	protein_coding	SPARC	-1.05518	1.67972e-05
ENSG00000105519	protein_coding	CAPS	-1.05535	0.0094536
ENSG00000124193	protein_coding	SRSF6	-1.05539	0.00018851
ENSG00000141127	protein_coding	PRPSAP2	-1.05557	0.000357329
ENSG00000168824	protein_coding	NSG1	-1.05563	5.225e-05
ENSG00000060558	protein_coding	GNA15	-1.05565	7.82108e-05
ENSG00000187837	protein_coding	H1-2	-1.05582	0.00376705
ENSG00000132740	protein_coding	IGHMBP2	-1.0563	8.56558e-05
ENSG00000165480	protein_coding	SKA3	-1.05642	0.00447601
ENSG00000163626	protein_coding	COX18	-1.05647	8.92082e-05
ENSG00000037241	protein_coding	RPL26L1	-1.05651	4.23988e-05
ENSG00000137692	protein_coding	DCUN1D5	-1.05695	0.00740158
ENSG00000002919	protein_coding	SNX11	-1.05728	7.14822e-06
ENSG00000187741	protein_coding	FANCA	-1.05784	0.00919492
ENSG00000172172	protein_coding	MRPL13	-1.05791	0.00189857
ENSG00000204394	protein_coding	VARS1	-1.0582	5.0291e-05
ENSG00000163104	protein_coding	SMARCAD1	-1.05842	0.000521353
ENSG00000263465	protein_coding	SRSF8	-1.05848	0.000878339
ENSG00000182952	protein_coding	HMGN4	-1.05867	0.00853077
ENSG00000167863	protein_coding	ATP5PD	-1.05902	3.89803e-05
ENSG00000148341	protein_coding	SH3GLB2	-1.05908	5.0381e-05
ENSG00000009844	protein_coding	VTA1	-1.05915	0.000340927
ENSG00000143493	protein_coding	INTS7	-1.05953	8.93654e-06
ENSG00000010278	protein_coding	CD9	-1.05957	4.71445e-05
ENSG00000212864	protein_coding	RNF208	-1.05979	0.000481613
ENSG00000123131	protein_coding	PRDX4	-1.05989	1.36866e-05
ENSG00000167733	protein_coding	HSD11B1L	-1.06016	0.00414564
ENSG00000118508	protein_coding	RAB32	-1.06039	0.00321464
ENSG00000133466	protein_coding	C1QTNF6	-1.0605	2.26503e-06
ENSG00000187193	protein_coding	MT1X	-1.06062	5.31484e-05
ENSG00000133641	protein_coding	C12orf29	-1.06084	0.00170596
ENSG00000165244	protein_coding	ZNF367	-1.06084	0.00058592
ENSG00000132646	protein_coding	PCNA	-1.06088	0.000240241
ENSG00000168917	protein_coding	SLC35G2	-1.06127	0.011661
ENSG00000144589	protein_coding	STK11IP	-1.06134	1.9743e-05
ENSG00000181830	protein_coding	SLC35C1	-1.0614	0.00027459
ENSG00000152382	protein_coding	TADA1	-1.06141	0.000963894
ENSG00000139405	protein_coding	RITA1	-1.06151	0.000498456
ENSG00000042429	protein_coding	MED17	-1.06154	0.00391514
ENSG00000119537	protein_coding	KDSR	-1.06178	7.25257e-05
ENSG00000165688	protein_coding	PMPCA	-1.06196	0.000344505
ENSG00000170291	protein_coding	ELP5	-1.06212	4.88789e-05
ENSG00000110074	protein_coding	FOXRED1	-1.06229	3.40438e-05
ENSG00000286075	protein_coding	AC009412.1	-1.06239	0.00896157
ENSG00000134294	protein_coding	SLC38A2	-1.06239	0.00218434
ENSG00000172922	protein_coding	RNASEH2C	-1.06243	9.94688e-05
ENSG00000187735	protein_coding	TCEA1	-1.0625	2.83549e-05
ENSG00000136694	protein_coding	IL36A	-1.0627	0.0131065
ENSG00000159527	protein_coding	PGLYRP3	-1.06314	0.00425447
ENSG00000106460	protein_coding	TMEM106B	-1.06324	0.00145044
ENSG00000105538	protein_coding	RASIP1	-1.06324	0.000867857
ENSG00000102317	protein_coding	RBM3	-1.06332	7.27339e-06
ENSG00000164934	protein_coding	DCAF13	-1.06343	0.00532142
ENSG00000066379	protein_coding	ZNRD1	-1.06351	0.00135639
ENSG00000213995	protein_coding	NAXD	-1.06352	6.43103e-05
ENSG00000146701	protein_coding	MDH2	-1.06354	2.24906e-05
ENSG00000100842	protein_coding	EFS	-1.06387	0.000668658
ENSG00000185825	protein_coding	BCAP31	-1.06414	5.26143e-05
ENSG00000115275	protein_coding	MOGS	-1.06422	5.90669e-05
ENSG00000104723	protein_coding	TUSC3	-1.06441	0.000284722
ENSG00000141026	protein_coding	MED9	-1.06457	3.43112e-05
ENSG00000089063	protein_coding	TMEM230	-1.06482	7.3653e-05
ENSG00000169564	protein_coding	PCBP1	-1.06483	7.84441e-05
ENSG00000002587	protein_coding	HS3ST1	-1.06523	7.34718e-05
ENSG00000144451	protein_coding	SPAG16	-1.06541	0.0042675
ENSG00000146842	protein_coding	TMEM209	-1.06556	4.21283e-05
ENSG00000026103	protein_coding	FAS	-1.06569	0.00255927
ENSG00000180773	protein_coding	SLC36A4	-1.06589	0.000269528
ENSG00000119650	protein_coding	IFT43	-1.06604	2.59692e-05
ENSG00000181991	protein_coding	MRPS11	-1.0665	0.000131333
ENSG00000112312	protein_coding	GMNN	-1.0671	0.00153809
ENSG00000214367	protein_coding	HAUS3	-1.06725	0.000356803
ENSG00000213246	protein_coding	SUPT4H1	-1.06829	1.48543e-05
ENSG00000179152	protein_coding	TCAIM	-1.06834	2.46816e-05
ENSG00000123737	protein_coding	EXOSC9	-1.06834	6.51322e-05
ENSG00000119523	protein_coding	ALG2	-1.06857	0.00098462
ENSG00000249915	protein_coding	PDCD6	-1.06922	0.000862547
ENSG00000138134	protein_coding	STAMBPL1	-1.06986	0.000159214
ENSG00000122952	protein_coding	ZWINT	-1.07019	0.00178893
ENSG00000108242	protein_coding	CYP2C18	-1.07023	0.0039513
ENSG00000149809	protein_coding	TM7SF2	-1.07025	0.00208835
ENSG00000106211	protein_coding	HSPB1	-1.07039	0.000950377
ENSG00000150456	protein_coding	EEF1AKMT1	-1.07072	0.00247181
ENSG00000060688	protein_coding	SNRNP40	-1.07078	8.04685e-06
ENSG00000059122	protein_coding	FLYWCH1	-1.07147	0.00109425
ENSG00000105173	protein_coding	CCNE1	-1.07172	5.32347e-05
ENSG00000124226	protein_coding	RNF114	-1.07206	4.77727e-06
ENSG00000012061	protein_coding	ERCC1	-1.07207	0.000182443
ENSG00000170561	protein_coding	IRX2	-1.07209	0.00133694
ENSG00000141959	protein_coding	PFKL	-1.07212	0.00185479
ENSG00000186187	protein_coding	ZNRF1	-1.07214	0.00021191
ENSG00000091164	protein_coding	TXNL1	-1.07246	0.000280659
ENSG00000083838	protein_coding	ZNF446	-1.07286	0.00312548
ENSG00000100034	protein_coding	PPM1F	-1.07351	7.15322e-05
ENSG00000169756	protein_coding	LIMS1	-1.07405	0.00020456
ENSG00000006451	protein_coding	RALA	-1.07422	0.000451606
ENSG00000240747	protein_coding	KRBOX1	-1.07432	0.00209574
ENSG00000143228	protein_coding	NUF2	-1.07519	0.00229279
ENSG00000014123	protein_coding	UFL1	-1.07524	8.98167e-05
ENSG00000166136	protein_coding	NDUFB8	-1.07555	6.13691e-05
ENSG00000166483	protein_coding	WEE1	-1.07577	5.40526e-05
ENSG00000167925	protein_coding	GHDC	-1.07579	9.92145e-05
ENSG00000177853	protein_coding	ZNF518A	-1.07584	0.000269764
ENSG00000169020	protein_coding	ATP5ME	-1.07606	0.000304339
ENSG00000157870	protein_coding	PRXL2B	-1.07611	0.000462271
ENSG00000140682	protein_coding	TGFB1I1	-1.07626	0.000757846
ENSG00000186871	protein_coding	ERCC6L	-1.07643	0.0156344
ENSG00000215717	protein_coding	TMEM167B	-1.07645	0.00258254
ENSG00000105889	protein_coding	STEAP1B	-1.07652	1.8193e-05
ENSG00000114388	protein_coding	NPRL2	-1.0766	0.000129593
ENSG00000261221	protein_coding	ZNF865	-1.07677	0.000396223
ENSG00000113119	protein_coding	TMCO6	-1.0768	0.0013061
ENSG00000100124	protein_coding	ANKRD54	-1.07716	6.39718e-06
ENSG00000075975	protein_coding	MKRN2	-1.07735	3.28848e-05
ENSG00000006282	protein_coding	SPATA20	-1.07752	0.000163009
ENSG00000132196	protein_coding	HSD17B7	-1.07776	4.75138e-05
ENSG00000177733	protein_coding	HNRNPA0	-1.07777	3.79658e-05
ENSG00000154813	protein_coding	DPH3	-1.07795	0.00825004
ENSG00000173145	protein_coding	NOC3L	-1.07801	0.00299904
ENSG00000132881	protein_coding	CPLANE2	-1.07842	0.00561005
ENSG00000179941	protein_coding	BBS10	-1.07846	0.00791409
ENSG00000133433	protein_coding	GSTT2B	-1.07847	0.00367592
ENSG00000157916	protein_coding	RER1	-1.07881	0.000129727
ENSG00000214087	protein_coding	ARL16	-1.0793	0.000146698
ENSG00000105171	protein_coding	POP4	-1.07931	0.00107715
ENSG00000168291	protein_coding	PDHB	-1.07954	0.00152097
ENSG00000182979	protein_coding	MTA1	-1.07989	0.000344731
ENSG00000075914	protein_coding	EXOSC7	-1.08009	9.56683e-05
ENSG00000076924	protein_coding	XAB2	-1.08028	0.00154605
ENSG00000095794	protein_coding	CREM	-1.08081	0.000178927
ENSG00000091947	protein_coding	TMEM101	-1.08093	0.00101597
ENSG00000137843	protein_coding	PAK6	-1.08102	3.91778e-05
ENSG00000198805	protein_coding	PNP	-1.08182	0.000204162
ENSG00000136986	protein_coding	DERL1	-1.08186	1.45804e-05
ENSG00000164120	protein_coding	HPGD	-1.0822	0.0354414
ENSG00000157456	protein_coding	CCNB2	-1.08244	0.00636158
ENSG00000106723	protein_coding	SPIN1	-1.0827	0.000630852
ENSG00000083457	protein_coding	ITGAE	-1.08292	0.000299198
ENSG00000136695	protein_coding	IL36RN	-1.08295	4.91857e-05
ENSG00000145431	protein_coding	PDGFC	-1.08298	0.000187124
ENSG00000198060	protein_coding	MARCHF5	-1.08325	0.000938158
ENSG00000221829	protein_coding	FANCG	-1.08329	0.00409049
ENSG00000117748	protein_coding	RPA2	-1.08342	9.90236e-06
ENSG00000054116	protein_coding	TRAPPC3	-1.08371	2.40876e-05
ENSG00000177854	protein_coding	TMEM187	-1.08391	0.0031359
ENSG00000077254	protein_coding	USP33	-1.08437	0.000649469
ENSG00000139433	protein_coding	GLTP	-1.0845	3.46536e-05
ENSG00000084072	protein_coding	PPIE	-1.08451	6.19156e-05
ENSG00000183060	protein_coding	LYSMD4	-1.08489	7.04259e-05
ENSG00000110801	protein_coding	PSMD9	-1.08509	7.75507e-05
ENSG00000104835	protein_coding	SARS2	-1.08514	0.000230449
ENSG00000213639	protein_coding	PPP1CB	-1.08516	0.00512597
ENSG00000184056	protein_coding	VPS33B	-1.08567	0.000155407
ENSG00000089009	protein_coding	RPL6	-1.0862	9.59144e-06
ENSG00000105258	protein_coding	POLR2I	-1.08622	0.000370483
ENSG00000081181	protein_coding	ARG2	-1.08653	1.98208e-05
ENSG00000011132	protein_coding	APBA3	-1.08667	0.00042068
ENSG00000284308	protein_coding	C2orf81	-1.08708	0.000415547
ENSG00000132153	protein_coding	DHX30	-1.08719	0.000281631
ENSG00000136381	protein_coding	IREB2	-1.08758	0.00129083
ENSG00000163156	protein_coding	SCNM1	-1.08771	0.000178008
ENSG00000141556	protein_coding	TBCD	-1.08803	0.000204658
ENSG00000165891	protein_coding	E2F7	-1.0881	0.000638077
ENSG00000244187	protein_coding	TMEM141	-1.08839	4.96089e-05
ENSG00000163794	protein_coding	UCN	-1.0884	0.0030777
ENSG00000162341	protein_coding	TPCN2	-1.08848	5.39621e-05
ENSG00000092108	protein_coding	SCFD1	-1.08896	0.000274964
ENSG00000173928	protein_coding	SWSAP1	-1.08943	0.000616968
ENSG00000084774	protein_coding	CAD	-1.08948	3.82726e-05
ENSG00000169955	protein_coding	ZNF747	-1.08998	9.64809e-05
ENSG00000136830	protein_coding	NIBAN2	-1.09015	0.000360343
ENSG00000053770	protein_coding	AP5M1	-1.09027	0.00614987
ENSG00000167862	protein_coding	MRPL58	-1.0906	3.99385e-05
ENSG00000101856	protein_coding	PGRMC1	-1.09094	3.80506e-05
ENSG00000115084	protein_coding	SLC35F5	-1.09103	0.000951236
ENSG00000123992	protein_coding	DNPEP	-1.09106	1.60776e-05
ENSG00000104332	protein_coding	SFRP1	-1.09115	6.55823e-05
ENSG00000198546	protein_coding	ZNF511	-1.09146	0.000394714
ENSG00000185627	protein_coding	PSMD13	-1.0918	2.03421e-05
ENSG00000277791	protein_coding	PSMB3	-1.09206	5.53377e-05
ENSG00000149476	protein_coding	TKFC	-1.093	7.18157e-05
ENSG00000172932	protein_coding	ANKRD13D	-1.09318	0.00101149
ENSG00000008282	protein_coding	SYPL1	-1.09383	0.0113544
ENSG00000177666	protein_coding	PNPLA2	-1.09384	0.00258186
ENSG00000123728	protein_coding	RAP2C	-1.09422	0.00989119
ENSG00000182544	protein_coding	MFSD5	-1.09445	0.000137577
ENSG00000162032	protein_coding	SPSB3	-1.09525	0.000159361
ENSG00000008018	protein_coding	PSMB1	-1.09548	3.66839e-05
ENSG00000110330	protein_coding	BIRC2	-1.09583	0.00969911
ENSG00000168936	protein_coding	TMEM129	-1.09587	0.000930079
ENSG00000074855	protein_coding	ANO8	-1.09598	0.000201332
ENSG00000171522	protein_coding	PTGER4	-1.09627	2.06409e-05
ENSG00000139974	protein_coding	SLC38A6	-1.09632	0.0062112
ENSG00000151151	protein_coding	IPMK	-1.09656	0.000191847
ENSG00000164117	protein_coding	FBXO8	-1.09669	2.37466e-06
ENSG00000211460	protein_coding	TSN	-1.09678	0.00103455
ENSG00000154764	protein_coding	WNT7A	-1.09714	4.3392e-05
ENSG00000173898	protein_coding	SPTBN2	-1.09722	0.000807557
ENSG00000108773	protein_coding	KAT2A	-1.09725	2.07605e-05
ENSG00000142731	protein_coding	PLK4	-1.09742	0.000197499
ENSG00000166902	protein_coding	MRPL16	-1.09758	9.05088e-05
ENSG00000022277	protein_coding	RTF2	-1.09789	9.91308e-05
ENSG00000204334	protein_coding	ERICH2	-1.09789	0.0223044
ENSG00000131475	protein_coding	VPS25	-1.09812	7.82172e-06
ENSG00000114993	protein_coding	RTKN	-1.09815	3.57485e-05
ENSG00000138750	protein_coding	NUP54	-1.09826	0.000710495
ENSG00000002822	protein_coding	MAD1L1	-1.0985	0.000176195
ENSG00000178950	protein_coding	GAK	-1.09869	3.97385e-05
ENSG00000239900	protein_coding	ADSL	-1.09882	1.13949e-05
ENSG00000171155	protein_coding	C1GALT1C1	-1.09891	0.00278922
ENSG00000144118	protein_coding	RALB	-1.09896	0.000149821
ENSG00000119396	protein_coding	RAB14	-1.09945	0.00522235
ENSG00000166925	protein_coding	TSC22D4	-1.09985	0.000152307
ENSG00000090674	protein_coding	MCOLN1	-1.09994	8.17498e-05
ENSG00000135766	protein_coding	EGLN1	-1.10039	0.00164191
ENSG00000153339	protein_coding	TRAPPC8	-1.10042	0.0013223
ENSG00000112893	protein_coding	MAN2A1	-1.10063	0.00246354
ENSG00000162642	protein_coding	C1orf52	-1.10073	0.000478324
ENSG00000133818	protein_coding	RRAS2	-1.10078	0.00772246
ENSG00000120875	protein_coding	DUSP4	-1.1009	0.000149539
ENSG00000143207	protein_coding	COP1	-1.10104	0.000234256
ENSG00000131652	protein_coding	THOC6	-1.10117	0.00171796
ENSG00000104549	protein_coding	SQLE	-1.10119	0.000384179
ENSG00000163875	protein_coding	MEAF6	-1.10126	2.45652e-06
ENSG00000197457	protein_coding	STMN3	-1.10133	0.00050256
ENSG00000178026	protein_coding	LRRC75B	-1.10157	6.84785e-05
ENSG00000160193	protein_coding	WDR4	-1.10178	0.000580595
ENSG00000130021	protein_coding	PUDP	-1.10193	3.48639e-05
ENSG00000177700	protein_coding	POLR2L	-1.10198	0.000129192
ENSG00000018699	protein_coding	TTC27	-1.1026	9.81247e-05
ENSG00000149357	protein_coding	LAMTOR1	-1.10315	3.25634e-05
ENSG00000171861	protein_coding	MRM3	-1.10315	0.000208021
ENSG00000112679	protein_coding	DUSP22	-1.10329	0.000525398
ENSG00000137168	protein_coding	PPIL1	-1.10361	1.78543e-05
ENSG00000114631	protein_coding	PODXL2	-1.10367	0.0014619
ENSG00000154146	protein_coding	NRGN	-1.10415	0.00625543
ENSG00000143771	protein_coding	CNIH4	-1.10439	6.39882e-05
ENSG00000171161	protein_coding	ZNF672	-1.10445	1.82924e-05
ENSG00000124882	protein_coding	EREG	-1.1047	0.0093426
ENSG00000161267	protein_coding	BDH1	-1.10477	2.40463e-05
ENSG00000166165	protein_coding	CKB	-1.10492	0.00546988
ENSG00000135390	protein_coding	ATP5MC2	-1.10537	3.70399e-05
ENSG00000090263	protein_coding	MRPS33	-1.10547	2.98289e-05
ENSG00000174953	protein_coding	DHX36	-1.10555	0.000887678
ENSG00000157895	protein_coding	C12orf43	-1.10557	5.94071e-05
ENSG00000253250	protein_coding	C8orf88	-1.10572	0.00110641
ENSG00000143554	protein_coding	SLC27A3	-1.10611	0.00078233
ENSG00000213699	protein_coding	SLC35F6	-1.10617	1.28106e-05
ENSG00000164031	protein_coding	DNAJB14	-1.10675	0.00438054
ENSG00000119632	protein_coding	IFI27L2	-1.1068	0.00187689
ENSG00000182585	protein_coding	EPGN	-1.10684	0.00309835
ENSG00000198839	protein_coding	ZNF277	-1.107	0.00318594
ENSG00000167642	protein_coding	SPINT2	-1.10758	8.95728e-06
ENSG00000112877	protein_coding	CEP72	-1.10804	8.67713e-05
ENSG00000109332	protein_coding	UBE2D3	-1.10838	0.00237821
ENSG00000176092	protein_coding	CRYBG2	-1.10846	0.000159076
ENSG00000144362	protein_coding	PHOSPHO2	-1.10861	0.0212163
ENSG00000100599	protein_coding	AL159141.1	-1.10862	0.00150083
ENSG00000005893	protein_coding	LAMP2	-1.10874	0.0011296
ENSG00000157637	protein_coding	SLC38A10	-1.10876	0.00084889
ENSG00000100445	protein_coding	SDR39U1	-1.10883	0.000210098
ENSG00000101986	protein_coding	ABCD1	-1.10884	0.00046484
ENSG00000133612	protein_coding	AGAP3	-1.10893	0.000495087
ENSG00000081760	protein_coding	AACS	-1.11054	4.89722e-06
ENSG00000142627	protein_coding	EPHA2	-1.11084	0.000256123
ENSG00000114378	protein_coding	HYAL1	-1.1109	0.000213715
ENSG00000168701	protein_coding	TMEM208	-1.11121	0.00694942
ENSG00000198753	protein_coding	PLXNB3	-1.11123	0.00013809
ENSG00000173545	protein_coding	ZNF622	-1.11155	0.00172159
ENSG00000150990	protein_coding	DHX37	-1.11195	0.000249517
ENSG00000146143	protein_coding	PRIM2	-1.11203	1.29559e-05
ENSG00000163964	protein_coding	PIGX	-1.1124	2.26997e-05
ENSG00000057757	protein_coding	PITHD1	-1.1125	0.000128687
ENSG00000131748	protein_coding	STARD3	-1.11282	0.000298817
ENSG00000104320	protein_coding	NBN	-1.11299	0.00201462
ENSG00000143162	protein_coding	CREG1	-1.11312	0.0104934
ENSG00000035499	protein_coding	DEPDC1B	-1.11331	0.00204238
ENSG00000154227	protein_coding	CERS3	-1.11344	0.00021825
ENSG00000111666	protein_coding	CHPT1	-1.11364	0.00446022
ENSG00000104472	protein_coding	CHRAC1	-1.11453	2.76884e-05
ENSG00000179965	protein_coding	ZNF771	-1.1146	0.000574815
ENSG00000159720	protein_coding	ATP6V0D1	-1.11466	8.18248e-05
ENSG00000163605	protein_coding	PPP4R2	-1.11485	0.00725285
ENSG00000074071	protein_coding	MRPS34	-1.11491	0.00562165
ENSG00000100711	protein_coding	ZFYVE21	-1.115	0.000110319
ENSG00000168703	protein_coding	WFDC12	-1.11504	2.82731e-05
ENSG00000134897	protein_coding	BIVM	-1.11526	0.00218883
ENSG00000138138	protein_coding	ATAD1	-1.11533	0.00019566
ENSG00000141579	protein_coding	ZNF750	-1.11552	0.032732
ENSG00000165527	protein_coding	ARF6	-1.11589	0.000440263
ENSG00000163870	protein_coding	TPRA1	-1.11649	0.00133478
ENSG00000114098	protein_coding	ARMC8	-1.1166	0.000113678
ENSG00000166295	protein_coding	ANAPC16	-1.11688	0.000205915
ENSG00000221886	protein_coding	ZBED8	-1.11695	0.000222272
ENSG00000173812	protein_coding	EIF1	-1.11727	2.23232e-06
ENSG00000092931	protein_coding	MFSD11	-1.11756	0.000781098
ENSG00000047634	protein_coding	SCML1	-1.11787	2.08529e-05
ENSG00000138182	protein_coding	KIF20B	-1.11789	4.13208e-06
ENSG00000146731	protein_coding	CCT6A	-1.11817	0.000474671
ENSG00000131943	protein_coding	C19orf12	-1.11834	8.80514e-05
ENSG00000175390	protein_coding	EIF3F	-1.11841	7.05172e-06
ENSG00000100865	protein_coding	CINP	-1.11896	3.8727e-05
ENSG00000102393	protein_coding	GLA	-1.11904	0.000102209
ENSG00000105085	protein_coding	MED26	-1.11929	6.30255e-05
ENSG00000111057	protein_coding	KRT18	-1.1193	3.92272e-05
ENSG00000139133	protein_coding	ALG10	-1.11948	0.00147009
ENSG00000006625	protein_coding	GGCT	-1.11957	0.00250701
ENSG00000068078	protein_coding	FGFR3	-1.12009	0.000404917
ENSG00000141698	protein_coding	NT5C3B	-1.12058	2.03759e-05
ENSG00000125450	protein_coding	NUP85	-1.12087	1.55366e-05
ENSG00000176273	protein_coding	SLC35G1	-1.12121	0.00381384
ENSG00000130787	protein_coding	HIP1R	-1.12125	0.000319858
ENSG00000177030	protein_coding	DEAF1	-1.12183	0.00021072
ENSG00000092929	protein_coding	UNC13D	-1.12187	4.59342e-05
ENSG00000164466	protein_coding	SFXN1	-1.12193	1.17363e-05
ENSG00000074266	protein_coding	EED	-1.12209	8.48281e-05
ENSG00000131153	protein_coding	GINS2	-1.12215	0.00407721
ENSG00000170185	protein_coding	USP38	-1.12228	6.88175e-05
ENSG00000135070	protein_coding	ISCA1	-1.1223	0.00228385
ENSG00000008838	protein_coding	MED24	-1.12259	1.18278e-05
ENSG00000124532	protein_coding	MRS2	-1.12285	0.000636328
ENSG00000102879	protein_coding	CORO1A	-1.12294	0.00072815
ENSG00000101945	protein_coding	SUV39H1	-1.12365	0.000234009
ENSG00000125485	protein_coding	DDX31	-1.12408	3.18001e-05
ENSG00000129187	protein_coding	DCTD	-1.12446	6.8117e-05
ENSG00000188807	protein_coding	TMEM201	-1.12454	0.000348731
ENSG00000124659	protein_coding	TBCC	-1.1251	0.000321925
ENSG00000119383	protein_coding	PTPA	-1.12512	8.99399e-05
ENSG00000169570	protein_coding	DTWD2	-1.12522	0.000273681
ENSG00000108821	protein_coding	COL1A1	-1.12531	0.00711511
ENSG00000174840	protein_coding	PDE12	-1.12541	0.00232171
ENSG00000182180	protein_coding	MRPS16	-1.12548	0.000325307
ENSG00000126457	protein_coding	PRMT1	-1.12561	0.000420095
ENSG00000130193	protein_coding	THEM6	-1.12564	0.000703486
ENSG00000158292	protein_coding	GPR153	-1.12589	9.0832e-05
ENSG00000172766	protein_coding	NAA16	-1.12602	0.000276443
ENSG00000151665	protein_coding	PIGF	-1.12619	0.00182912
ENSG00000164889	protein_coding	SLC4A2	-1.1267	0.000225129
ENSG00000286231	protein_coding	AL445423.3	-1.12678	0.000823018
ENSG00000165526	protein_coding	RPUSD4	-1.12715	0.000166773
ENSG00000174748	protein_coding	RPL15	-1.12759	0.000208489
ENSG00000116288	protein_coding	PARK7	-1.12784	2.39304e-05
ENSG00000167815	protein_coding	PRDX2	-1.12806	9.0105e-05
ENSG00000100219	protein_coding	XBP1	-1.12825	6.88253e-06
ENSG00000125703	protein_coding	ATG4C	-1.12826	0.000462205
ENSG00000285304	protein_coding	Z83844.3	-1.12835	0.00683879
ENSG00000176055	protein_coding	MBLAC2	-1.12858	0.000191333
ENSG00000187954	protein_coding	CYHR1	-1.12912	0.000270043
ENSG00000026025	protein_coding	VIM	-1.12921	4.78973e-05
ENSG00000112146	protein_coding	FBXO9	-1.12928	1.18045e-05
ENSG00000099899	protein_coding	TRMT2A	-1.12932	0.00201884
ENSG00000100994	protein_coding	PYGB	-1.12933	0.000112348
ENSG00000099889	protein_coding	ARVCF	-1.12992	0.00511467
ENSG00000103174	protein_coding	NAGPA	-1.13047	0.000129648
ENSG00000278615	protein_coding	C11orf98	-1.13064	0.000181008
ENSG00000172239	protein_coding	PAIP1	-1.1315	0.00103687
ENSG00000112874	protein_coding	NUDT12	-1.13162	0.000515737
ENSG00000091317	protein_coding	CMTM6	-1.13163	0.000463227
ENSG00000034152	protein_coding	MAP2K3	-1.1317	0.000423118
ENSG00000067955	protein_coding	CBFB	-1.132	0.00422767
ENSG00000182481	protein_coding	KPNA2	-1.13214	1.65292e-05
ENSG00000138160	protein_coding	KIF11	-1.13237	0.0057855
ENSG00000157353	protein_coding	FCSK	-1.13271	0.000557424
ENSG00000180008	protein_coding	SOCS4	-1.13328	0.00348868
ENSG00000116212	protein_coding	LRRC42	-1.13342	0.000236027
ENSG00000160221	protein_coding	GATD3A	-1.13351	0.000808878
ENSG00000026559	protein_coding	KCNG1	-1.13355	0.00661038
ENSG00000187037	protein_coding	GPR141	-1.13383	0.00581077
ENSG00000168350	protein_coding	DEGS2	-1.13394	5.92424e-05
ENSG00000140406	protein_coding	TLNRD1	-1.13405	0.000482549
ENSG00000145723	protein_coding	GIN1	-1.13431	0.000701532
ENSG00000176399	protein_coding	DMRTA1	-1.13451	3.59993e-05
ENSG00000129195	protein_coding	PIMREG	-1.13452	0.00711163
ENSG00000143436	protein_coding	MRPL9	-1.13457	2.51363e-06
ENSG00000136243	protein_coding	NUP42	-1.13489	0.000316637
ENSG00000108559	protein_coding	NUP88	-1.13565	1.33688e-05
ENSG00000115750	protein_coding	TAF1B	-1.13582	0.000255188
ENSG00000228672	protein_coding	PROB1	-1.13588	0.000270448
ENSG00000253368	protein_coding	TRNP1	-1.13594	0.000235697
ENSG00000167759	protein_coding	KLK13	-1.13601	0.000114152
ENSG00000286264	protein_coding	AP001453.5	-1.13602	0.0118927
ENSG00000033178	protein_coding	UBA6	-1.13632	0.00176358
ENSG00000121621	protein_coding	KIF18A	-1.13641	3.08299e-05
ENSG00000137434	protein_coding	C6orf52	-1.13722	0.00768359
ENSG00000109065	protein_coding	NAT9	-1.13735	3.27845e-05
ENSG00000131966	protein_coding	ACTR10	-1.13773	0.00114753
ENSG00000166396	protein_coding	SERPINB7	-1.13782	0.000289595
ENSG00000114544	protein_coding	SLC41A3	-1.13785	7.36991e-05
ENSG00000175213	protein_coding	ZNF408	-1.13811	0.00606667
ENSG00000106089	protein_coding	STX1A	-1.1383	0.00010797
ENSG00000170027	protein_coding	YWHAG	-1.1389	0.00161725
ENSG00000196363	protein_coding	WDR5	-1.1392	1.32409e-05
ENSG00000172469	protein_coding	MANEA	-1.13926	0.000924027
ENSG00000118680	protein_coding	MYL12B	-1.13951	0.000265241
ENSG00000181038	protein_coding	METTL23	-1.13972	3.83036e-05
ENSG00000173653	protein_coding	RCE1	-1.13991	3.23365e-05
ENSG00000081154	protein_coding	PCNP	-1.13991	0.00205319
ENSG00000130165	protein_coding	ELOF1	-1.13999	3.92109e-05
ENSG00000204323	protein_coding	SMIM5	-1.14001	4.82095e-06
ENSG00000151117	protein_coding	TMEM86A	-1.14022	0.000472013
ENSG00000164081	protein_coding	TEX264	-1.14026	1.74703e-05
ENSG00000254999	protein_coding	BRK1	-1.14028	2.1479e-05
ENSG00000150433	protein_coding	TMEM218	-1.14046	3.27117e-06
ENSG00000111906	protein_coding	HDDC2	-1.14069	7.33023e-05
ENSG00000205544	protein_coding	TMEM256	-1.14093	0.000414802
ENSG00000129474	protein_coding	AJUBA	-1.1412	3.81892e-06
ENSG00000173327	protein_coding	MAP3K11	-1.14124	0.00132325
ENSG00000140553	protein_coding	UNC45A	-1.14124	6.26195e-05
ENSG00000136238	protein_coding	RAC1	-1.14175	4.67891e-06
ENSG00000105248	protein_coding	YJU2	-1.1419	5.7262e-05
ENSG00000124120	protein_coding	TTPAL	-1.14201	2.09548e-05
ENSG00000028116	protein_coding	VRK2	-1.14261	0.000518631
ENSG00000111911	protein_coding	HINT3	-1.14272	0.00274265
ENSG00000185808	protein_coding	PIGP	-1.14306	0.000168542
ENSG00000145002	protein_coding	FAM86B2	-1.14341	0.00110338
ENSG00000169016	protein_coding	E2F6	-1.14404	0.000732143
ENSG00000112651	protein_coding	MRPL2	-1.14406	5.20058e-05
ENSG00000153294	protein_coding	ADGRF4	-1.14439	2.51591e-05
ENSG00000155330	protein_coding	C16orf87	-1.14495	0.000188154
ENSG00000107372	protein_coding	ZFAND5	-1.14516	0.0013802
ENSG00000134825	protein_coding	TMEM258	-1.14561	8.98092e-05
ENSG00000177697	protein_coding	CD151	-1.14577	0.0010532
ENSG00000134308	protein_coding	YWHAQ	-1.14599	0.000970451
ENSG00000196196	protein_coding	HRCT1	-1.14655	0.00180089
ENSG00000050393	protein_coding	MCUR1	-1.14655	2.89736e-05
ENSG00000263155	protein_coding	MYZAP	-1.14672	0.00240242
ENSG00000189120	protein_coding	SP6	-1.14699	0.00111629
ENSG00000183386	protein_coding	FHL3	-1.14783	1.52651e-05
ENSG00000100319	protein_coding	ZMAT5	-1.14797	0.0035756
ENSG00000163701	protein_coding	IL17RE	-1.14811	5.70112e-06
ENSG00000135845	protein_coding	PIGC	-1.14885	5.44365e-05
ENSG00000117479	protein_coding	SLC19A2	-1.14889	0.0010079
ENSG00000177303	protein_coding	CASKIN2	-1.14954	0.000464923
ENSG00000198689	protein_coding	SLC9A6	-1.14986	2.62915e-05
ENSG00000126088	protein_coding	UROD	-1.15038	0.00020246
ENSG00000119965	protein_coding	C10orf88	-1.15093	0.00298603
ENSG00000117691	protein_coding	NENF	-1.15099	5.27299e-05
ENSG00000027869	protein_coding	SH2D2A	-1.15131	0.00463494
ENSG00000213341	protein_coding	CHUK	-1.15132	0.000478074
ENSG00000116791	protein_coding	CRYZ	-1.15134	0.00245023
ENSG00000121211	protein_coding	MND1	-1.15165	0.00698842
ENSG00000068971	protein_coding	PPP2R5B	-1.15229	4.84996e-05
ENSG00000160325	protein_coding	CACFD1	-1.15233	0.00359865
ENSG00000132661	protein_coding	NXT1	-1.15252	1.72632e-05
ENSG00000139372	protein_coding	TDG	-1.15263	0.000453057
ENSG00000076604	protein_coding	TRAF4	-1.15355	0.000133602
ENSG00000066248	protein_coding	NGEF	-1.15372	3.45938e-05
ENSG00000157778	protein_coding	PSMG3	-1.15402	0.000271698
ENSG00000110108	protein_coding	TMEM109	-1.15453	4.95195e-05
ENSG00000186081	protein_coding	KRT5	-1.15467	3.11264e-06
ENSG00000175906	protein_coding	ARL4D	-1.15482	6.07372e-05
ENSG00000223496	protein_coding	EXOSC6	-1.15534	0.00076668
ENSG00000198755	protein_coding	RPL10A	-1.15545	3.58357e-06
ENSG00000198146	protein_coding	ZNF770	-1.15549	0.00980634
ENSG00000237190	protein_coding	CDKN2AIPNL	-1.15553	4.36909e-06
ENSG00000127554	protein_coding	GFER	-1.15649	0.000101189
ENSG00000176749	protein_coding	CDK5R1	-1.15693	1.99593e-05
ENSG00000147224	protein_coding	PRPS1	-1.15749	4.93543e-05
ENSG00000127399	protein_coding	LRRC61	-1.15774	0.00370443
ENSG00000132600	protein_coding	PRMT7	-1.15885	8.25669e-06
ENSG00000123739	protein_coding	PLA2G12A	-1.15915	6.97398e-05
ENSG00000095485	protein_coding	CWF19L1	-1.15972	3.19366e-05
ENSG00000106605	protein_coding	BLVRA	-1.15982	0.000276248
ENSG00000196531	protein_coding	NACA	-1.15997	1.39509e-05
ENSG00000126522	protein_coding	ASL	-1.16001	0.000260094
ENSG00000174547	protein_coding	MRPL11	-1.16013	0.000371787
ENSG00000135269	protein_coding	TES	-1.16038	2.22533e-05
ENSG00000099817	protein_coding	POLR2E	-1.16102	0.000835454
ENSG00000004961	protein_coding	HCCS	-1.16133	0.000134473
ENSG00000115761	protein_coding	NOL10	-1.16146	0.000119786
ENSG00000102934	protein_coding	PLLP	-1.1617	7.59855e-05
ENSG00000197006	protein_coding	METTL9	-1.16181	0.000145202
ENSG00000165802	protein_coding	NSMF	-1.16185	0.000386831
ENSG00000124006	protein_coding	OBSL1	-1.16195	6.05474e-05
ENSG00000140104	protein_coding	CLBA1	-1.16205	0.000690382
ENSG00000178462	protein_coding	TUBAL3	-1.16221	0.00655445
ENSG00000119801	protein_coding	YPEL5	-1.16239	0.00249024
ENSG00000105223	protein_coding	PLD3	-1.16252	0.000400625
ENSG00000145740	protein_coding	SLC30A5	-1.16262	0.000741425
ENSG00000204632	protein_coding	HLA-G	-1.16273	0.000373698
ENSG00000137691	protein_coding	CFAP300	-1.16332	0.0035477
ENSG00000169258	protein_coding	GPRIN1	-1.16402	0.00016012
ENSG00000147604	protein_coding	RPL7	-1.16434	0.000668253
ENSG00000185085	protein_coding	INTS5	-1.16439	7.80894e-05
ENSG00000119574	protein_coding	ZBTB45	-1.16479	0.00138006
ENSG00000197461	protein_coding	PDGFA	-1.16592	1.59362e-05
ENSG00000115226	protein_coding	FNDC4	-1.16625	0.000411724
ENSG00000160392	protein_coding	C19orf47	-1.16627	9.28353e-05
ENSG00000125753	protein_coding	VASP	-1.1664	2.61522e-05
ENSG00000196368	protein_coding	NUDT11	-1.16651	7.66673e-05
ENSG00000145979	protein_coding	TBC1D7	-1.16701	0.00243012
ENSG00000048162	protein_coding	NOP16	-1.16702	7.54091e-05
ENSG00000187017	protein_coding	ESPN	-1.16723	0.00120111
ENSG00000183763	protein_coding	TRAIP	-1.16771	0.00165924
ENSG00000178449	protein_coding	COX14	-1.16772	0.00353842
ENSG00000005194	protein_coding	CIAPIN1	-1.16793	9.32741e-06
ENSG00000111786	protein_coding	SRSF9	-1.16798	2.78943e-05
ENSG00000179111	protein_coding	HES7	-1.16813	0.00261924
ENSG00000244045	protein_coding	TMEM199	-1.16847	0.00226788
ENSG00000159685	protein_coding	CHCHD6	-1.16853	0.000296823
ENSG00000151366	protein_coding	NDUFC2	-1.16865	0.00219435
ENSG00000175063	protein_coding	UBE2C	-1.16906	0.02943
ENSG00000158805	protein_coding	ZNF276	-1.16917	0.000135338
ENSG00000100605	protein_coding	ITPK1	-1.16979	0.000134546
ENSG00000109270	protein_coding	LAMTOR3	-1.1698	0.00411593
ENSG00000159079	protein_coding	CFAP298	-1.17021	7.22876e-06
ENSG00000262246	protein_coding	CORO7	-1.17031	0.00127257
ENSG00000165794	protein_coding	SLC39A2	-1.17043	0.000159475
ENSG00000104885	protein_coding	DOT1L	-1.17063	0.000634442
ENSG00000002726	protein_coding	AOC1	-1.17079	0.00395323
ENSG00000187630	protein_coding	DHRS4L2	-1.17086	8.51221e-06
ENSG00000285976	protein_coding	AL135905.2	-1.17096	0.000193508
ENSG00000147669	protein_coding	POLR2K	-1.17111	0.00481093
ENSG00000111276	protein_coding	CDKN1B	-1.17148	0.00851052
ENSG00000057252	protein_coding	SOAT1	-1.1717	0.000183197
ENSG00000167797	protein_coding	CDK2AP2	-1.1722	0.000137156
ENSG00000197601	protein_coding	FAR1	-1.17267	0.000327321
ENSG00000157014	protein_coding	TATDN2	-1.17288	3.87519e-05
ENSG00000170265	protein_coding	ZNF282	-1.17293	0.000236268
ENSG00000119326	protein_coding	CTNNAL1	-1.17325	1.59827e-05
ENSG00000163293	protein_coding	NIPAL1	-1.1733	0.000126856
ENSG00000085840	protein_coding	ORC1	-1.17339	0.0223091
ENSG00000100483	protein_coding	VCPKMT	-1.17344	0.0154352
ENSG00000127445	protein_coding	PIN1	-1.17395	8.05257e-05
ENSG00000141582	protein_coding	CBX4	-1.17401	0.000215797
ENSG00000188130	protein_coding	MAPK12	-1.17402	0.000383409
ENSG00000162517	protein_coding	PEF1	-1.1742	3.22883e-05
ENSG00000100138	protein_coding	SNU13	-1.1744	1.33941e-05
ENSG00000145736	protein_coding	GTF2H2	-1.17464	0.000106212
ENSG00000188070	protein_coding	C11orf95	-1.17496	1.51637e-05
ENSG00000126215	protein_coding	XRCC3	-1.17508	0.000195874
ENSG00000131408	protein_coding	NR1H2	-1.17581	0.000269191
ENSG00000130701	protein_coding	RBBP8NL	-1.176	0.000328288
ENSG00000105556	protein_coding	MIER2	-1.176	0.000119709
ENSG00000110651	protein_coding	CD81	-1.17621	0.000191635
ENSG00000181788	protein_coding	SIAH2	-1.17653	9.7134e-06
ENSG00000166471	protein_coding	TMEM41B	-1.17717	0.000480952
ENSG00000136897	protein_coding	MRPL50	-1.17731	0.000720454
ENSG00000108829	protein_coding	LRRC59	-1.17752	8.84442e-06
ENSG00000131368	protein_coding	MRPS25	-1.17762	1.99285e-05
ENSG00000141425	protein_coding	RPRD1A	-1.17774	9.09886e-05
ENSG00000126947	protein_coding	ARMCX1	-1.17885	0.00516947
ENSG00000215788	protein_coding	TNFRSF25	-1.17886	9.10592e-05
ENSG00000057663	protein_coding	ATG5	-1.17902	0.000264805
ENSG00000197766	protein_coding	CFD	-1.17968	0.00294136
ENSG00000167656	protein_coding	LY6D	-1.17972	0.00349364
ENSG00000185298	protein_coding	CCDC137	-1.17998	4.86241e-05
ENSG00000274049	protein_coding	INO80B-WBP1	-1.18084	0.00885551
ENSG00000116752	protein_coding	BCAS2	-1.18086	0.00900086
ENSG00000130733	protein_coding	YIPF2	-1.18156	0.00193431
ENSG00000176428	protein_coding	VPS37D	-1.18194	6.82765e-05
ENSG00000117450	protein_coding	PRDX1	-1.18217	0.000116719
ENSG00000257949	protein_coding	TEN1	-1.18226	0.000600941
ENSG00000063660	protein_coding	GPC1	-1.18258	0.003399
ENSG00000178537	protein_coding	SLC25A20	-1.1831	0.00113223
ENSG00000171853	protein_coding	TRAPPC12	-1.18379	6.35922e-06
ENSG00000187531	protein_coding	SIRT7	-1.18383	6.11823e-05
ENSG00000163541	protein_coding	SUCLG1	-1.18392	1.85195e-05
ENSG00000153898	protein_coding	MCOLN2	-1.18404	1.44825e-05
ENSG00000008710	protein_coding	PKD1	-1.18454	0.000763498
ENSG00000178921	protein_coding	PFAS	-1.18462	9.29978e-05
ENSG00000140854	protein_coding	KATNB1	-1.18484	0.00124146
ENSG00000144647	protein_coding	POMGNT2	-1.18507	0.0026684
ENSG00000158109	protein_coding	TPRG1L	-1.18554	0.000445311
ENSG00000125863	protein_coding	MKKS	-1.18573	3.9847e-06
ENSG00000140519	protein_coding	RHCG	-1.18588	0.000115786
ENSG00000071894	protein_coding	CPSF1	-1.18606	0.000436741
ENSG00000167645	protein_coding	YIF1B	-1.18614	8.55872e-05
ENSG00000146904	protein_coding	EPHA1	-1.18628	0.000105485
ENSG00000197150	protein_coding	ABCB8	-1.18654	0.000614139
ENSG00000140254	protein_coding	DUOXA1	-1.18721	7.39061e-06
ENSG00000130762	protein_coding	ARHGEF16	-1.18738	0.000323984
ENSG00000123353	protein_coding	ORMDL2	-1.18755	2.46959e-06
ENSG00000168894	protein_coding	RNF181	-1.18759	7.73831e-06
ENSG00000189280	protein_coding	GJB5	-1.18772	3.62728e-06
ENSG00000164967	protein_coding	RPP25L	-1.18816	0.000306342
ENSG00000241852	protein_coding	C8orf58	-1.18823	0.000383112
ENSG00000100316	protein_coding	RPL3	-1.18835	1.46985e-05
ENSG00000152422	protein_coding	XRCC4	-1.1886	0.000758296
ENSG00000127314	protein_coding	RAP1B	-1.18903	0.00711937
ENSG00000114738	protein_coding	MAPKAPK3	-1.18919	3.9321e-05
ENSG00000116954	protein_coding	RRAGC	-1.18943	0.00299167
ENSG00000168096	protein_coding	ANKS3	-1.18945	0.000556152
ENSG00000131143	protein_coding	COX4I1	-1.18952	7.25955e-05
ENSG00000157837	protein_coding	SPPL3	-1.19028	4.5632e-06
ENSG00000205981	protein_coding	DNAJC19	-1.19029	8.89259e-06
ENSG00000160796	protein_coding	NBEAL2	-1.19043	0.00014819
ENSG00000110025	protein_coding	SNX15	-1.19051	0.0123383
ENSG00000121022	protein_coding	COPS5	-1.19081	0.00294381
ENSG00000205903	protein_coding	ZNF316	-1.1911	5.06e-05
ENSG00000188760	protein_coding	TMEM198	-1.19175	0.000557925
ENSG00000204228	protein_coding	HSD17B8	-1.19181	0.00127481
ENSG00000162695	protein_coding	SLC30A7	-1.19182	0.000882053
ENSG00000068137	protein_coding	PLEKHH3	-1.19219	0.000979627
ENSG00000171224	protein_coding	FAM241B	-1.19238	0.00104596
ENSG00000130529	protein_coding	TRPM4	-1.19291	0.000256104
ENSG00000221983	protein_coding	UBA52	-1.19331	5.91368e-05
ENSG00000034713	protein_coding	GABARAPL2	-1.19343	5.28824e-06
ENSG00000165304	protein_coding	MELK	-1.19393	0.00185644
ENSG00000182400	protein_coding	TRAPPC6B	-1.19408	0.00531404
ENSG00000280789	protein_coding	PAGR1	-1.19423	7.21298e-05
ENSG00000167553	protein_coding	TUBA1C	-1.19424	4.2292e-05
ENSG00000285043	protein_coding	AC093512.2	-1.1947	0.0322129
ENSG00000146409	protein_coding	SLC18B1	-1.19521	0.00363803
ENSG00000155903	protein_coding	RASA2	-1.19563	0.000291509
ENSG00000163463	protein_coding	KRTCAP2	-1.19591	1.36256e-05
ENSG00000159176	protein_coding	CSRP1	-1.19604	0.000110501
ENSG00000118816	protein_coding	CCNI	-1.19656	1.55793e-05
ENSG00000091732	protein_coding	ZC3HC1	-1.19675	1.8044e-05
ENSG00000064995	protein_coding	TAF11	-1.19686	0.000175586
ENSG00000164144	protein_coding	ARFIP1	-1.19719	0.00143346
ENSG00000165916	protein_coding	PSMC3	-1.19723	5.52923e-06
ENSG00000133315	protein_coding	MACROD1	-1.19745	0.00206429
ENSG00000141428	protein_coding	C18orf21	-1.19755	0.000221466
ENSG00000146476	protein_coding	ARMT1	-1.19786	0.00142911
ENSG00000243667	protein_coding	WDR92	-1.19822	7.15032e-05
ENSG00000126903	protein_coding	SLC10A3	-1.19864	0.000516786
ENSG00000117602	protein_coding	RCAN3	-1.19921	0.000354164
ENSG00000175768	protein_coding	TOMM5	-1.19934	0.000572211
ENSG00000183889	protein_coding	AC138969.1	-1.19971	0.000168959
ENSG00000100142	protein_coding	POLR2F	-1.19977	0.000371557
ENSG00000100949	protein_coding	RABGGTA	-1.19985	2.03413e-05
ENSG00000159166	protein_coding	LAD1	-1.2	3.25724e-05
ENSG00000060971	protein_coding	ACAA1	-1.20026	0.000213077
ENSG00000081721	protein_coding	DUSP12	-1.20102	0.00234319
ENSG00000276043	protein_coding	UHRF1	-1.20111	0.00367688
ENSG00000064666	protein_coding	CNN2	-1.20145	8.41635e-05
ENSG00000082153	protein_coding	BZW1	-1.20159	0.00264966
ENSG00000075131	protein_coding	TIPIN	-1.20175	3.0921e-06
ENSG00000132591	protein_coding	ERAL1	-1.20223	6.08765e-06
ENSG00000180992	protein_coding	MRPL14	-1.20344	1.20188e-05
ENSG00000112167	protein_coding	SAYSD1	-1.20366	8.34946e-05
ENSG00000171492	protein_coding	LRRC8D	-1.20427	0.00129125
ENSG00000169710	protein_coding	FASN	-1.2045	0.0042084
ENSG00000099377	protein_coding	HSD3B7	-1.20464	0.00087632
ENSG00000129083	protein_coding	COPB1	-1.20476	0.000577488
ENSG00000109016	protein_coding	DHRS7B	-1.20488	8.21846e-06
ENSG00000133731	protein_coding	IMPA1	-1.20494	0.00458215
ENSG00000071553	protein_coding	ATP6AP1	-1.20517	9.69e-06
ENSG00000165152	protein_coding	PGAP4	-1.2054	3.8618e-06
ENSG00000133243	protein_coding	BTBD2	-1.20565	0.00685272
ENSG00000141076	protein_coding	UTP4	-1.20566	1.23277e-05
ENSG00000278535	protein_coding	DHRS11	-1.20567	0.000111299
ENSG00000124466	protein_coding	LYPD3	-1.20569	1.31876e-05
ENSG00000133275	protein_coding	CSNK1G2	-1.20614	0.00038162
ENSG00000215375	protein_coding	MYL5	-1.20637	0.00022223
ENSG00000005700	protein_coding	IBTK	-1.20671	0.00438255
ENSG00000269858	protein_coding	EGLN2	-1.20685	2.93183e-05
ENSG00000168522	protein_coding	FNTA	-1.20716	0.00220904
ENSG00000130244	protein_coding	FAM98C	-1.20737	3.52333e-05
ENSG00000138459	protein_coding	SLC35A5	-1.20797	0.000388476
ENSG00000100401	protein_coding	RANGAP1	-1.20816	5.56733e-05
ENSG00000089280	protein_coding	FUS	-1.20888	8.05736e-05
ENSG00000139044	protein_coding	B4GALNT3	-1.20895	4.40338e-05
ENSG00000143971	protein_coding	ETAA1	-1.209	0.000277173
ENSG00000122042	protein_coding	UBL3	-1.21001	0.000273333
ENSG00000125826	protein_coding	RBCK1	-1.21012	0.000607701
ENSG00000162194	protein_coding	LBHD1	-1.21043	6.79199e-05
ENSG00000082996	protein_coding	RNF13	-1.21052	0.000263879
ENSG00000153066	protein_coding	TXNDC11	-1.21059	8.21854e-06
ENSG00000105372	protein_coding	RPS19	-1.21085	0.00167357
ENSG00000128708	protein_coding	HAT1	-1.21087	0.000132447
ENSG00000152253	protein_coding	SPC25	-1.2113	0.00072238
ENSG00000168040	protein_coding	FADD	-1.21143	0.0048415
ENSG00000088832	protein_coding	FKBP1A	-1.21168	1.31521e-05
ENSG00000085415	protein_coding	SEH1L	-1.2119	9.27394e-05
ENSG00000100290	protein_coding	BIK	-1.21211	5.04677e-05
ENSG00000105968	protein_coding	H2AZ2	-1.21224	2.51674e-06
ENSG00000111652	protein_coding	COPS7A	-1.21315	3.11522e-05
ENSG00000159692	protein_coding	CTBP1	-1.21344	0.000294291
ENSG00000120162	protein_coding	MOB3B	-1.2135	3.5577e-05
ENSG00000181751	protein_coding	C5orf30	-1.21354	0.00509854
ENSG00000196998	protein_coding	WDR45	-1.2136	0.000160688
ENSG00000065911	protein_coding	MTHFD2	-1.21391	0.000410282
ENSG00000111726	protein_coding	CMAS	-1.21416	0.00332494
ENSG00000197548	protein_coding	ATG7	-1.21426	9.48132e-05
ENSG00000087008	protein_coding	ACOX3	-1.21444	0.000153523
ENSG00000161542	protein_coding	PRPSAP1	-1.21477	8.61611e-06
ENSG00000171863	protein_coding	RPS7	-1.21486	3.14644e-05
ENSG00000125454	protein_coding	SLC25A19	-1.21574	0.000241914
ENSG00000135750	protein_coding	KCNK1	-1.21581	4.7899e-05
ENSG00000127837	protein_coding	AAMP	-1.21608	0.000399568
ENSG00000185187	protein_coding	SIGIRR	-1.21678	0.000189948
ENSG00000082146	protein_coding	STRADB	-1.21713	5.13665e-05
ENSG00000150681	protein_coding	RGS18	-1.21776	0.000557671
ENSG00000214711	protein_coding	CAPN14	-1.21786	0.000566788
ENSG00000114902	protein_coding	SPCS1	-1.2179	0.00119361
ENSG00000023697	protein_coding	DERA	-1.21842	1.21355e-05
ENSG00000032389	protein_coding	EIPR1	-1.21858	2.39822e-05
ENSG00000166557	protein_coding	TMED3	-1.21862	1.27002e-05
ENSG00000115091	protein_coding	ACTR3	-1.21884	0.000141674
ENSG00000110536	protein_coding	PTPMT1	-1.21887	1.52659e-05
ENSG00000160410	protein_coding	SHKBP1	-1.21891	0.00108002
ENSG00000138675	protein_coding	FGF5	-1.22014	0.00204812
ENSG00000079313	protein_coding	REXO1	-1.22021	0.00147823
ENSG00000248487	protein_coding	ABHD14A	-1.22028	0.000685526
ENSG00000165629	protein_coding	ATP5F1C	-1.22044	0.000126179
ENSG00000117143	protein_coding	UAP1	-1.22055	0.000265451
ENSG00000135441	protein_coding	BLOC1S1	-1.22073	0.00111918
ENSG00000086827	protein_coding	ZW10	-1.22094	1.25709e-05
ENSG00000035141	protein_coding	FAM136A	-1.2211	0.000131807
ENSG00000167393	protein_coding	PPP2R3B	-1.22113	5.18928e-05
ENSG00000049541	protein_coding	RFC2	-1.22127	0.00022424
ENSG00000171311	protein_coding	EXOSC1	-1.22129	4.36817e-06
ENSG00000011478	protein_coding	QPCTL	-1.22142	0.000365793
ENSG00000065135	protein_coding	GNAI3	-1.22149	0.00102482
ENSG00000103037	protein_coding	SETD6	-1.22157	0.000249579
ENSG00000074582	protein_coding	BCS1L	-1.22161	0.000131644
ENSG00000156052	protein_coding	GNAQ	-1.22205	0.000249194
ENSG00000103335	protein_coding	PIEZO1	-1.2222	0.00122225
ENSG00000104964	protein_coding	TLE5	-1.22231	0.000183992
ENSG00000186340	protein_coding	THBS2	-1.22254	0.00726559
ENSG00000164053	protein_coding	ATRIP	-1.22267	5.77809e-06
ENSG00000170604	protein_coding	IRF2BP1	-1.22284	5.83082e-05
ENSG00000167965	protein_coding	MLST8	-1.22339	0.000479125
ENSG00000168958	protein_coding	MFF	-1.22347	1.97196e-05
ENSG00000137818	protein_coding	RPLP1	-1.22355	0.00120464
ENSG00000119655	protein_coding	NPC2	-1.22404	2.28181e-06
ENSG00000121716	protein_coding	PILRB	-1.2241	0.00353678
ENSG00000185813	protein_coding	PCYT2	-1.2246	3.3502e-05
ENSG00000099622	protein_coding	CIRBP	-1.22465	4.4121e-05
ENSG00000148343	protein_coding	MIGA2	-1.22479	2.04995e-05
ENSG00000182261	protein_coding	NLRP10	-1.22488	0.000410891
ENSG00000237649	protein_coding	KIFC1	-1.22527	0.0149774
ENSG00000171033	protein_coding	PKIA	-1.22569	0.000279241
ENSG00000186416	protein_coding	NKRF	-1.22579	0.000223167
ENSG00000148154	protein_coding	UGCG	-1.22598	0.000420883
ENSG00000171119	protein_coding	NRTN	-1.22601	0.00238252
ENSG00000241837	protein_coding	ATP5PO	-1.2261	4.48461e-05
ENSG00000203705	protein_coding	TATDN3	-1.22614	1.05304e-05
ENSG00000186603	protein_coding	HPDL	-1.22634	5.94174e-05
ENSG00000134046	protein_coding	MBD2	-1.22655	1.15869e-06
ENSG00000276023	protein_coding	DUSP14	-1.22734	3.98145e-06
ENSG00000176018	protein_coding	LYSMD3	-1.22774	0.00597629
ENSG00000133597	protein_coding	ADCK2	-1.22813	9.07367e-06
ENSG00000119820	protein_coding	YIPF4	-1.22819	0.00242072
ENSG00000182287	protein_coding	AP1S2	-1.22836	0.000717063
ENSG00000221838	protein_coding	AP4M1	-1.22861	7.41223e-06
ENSG00000169129	protein_coding	AFAP1L2	-1.22899	1.36804e-05
ENSG00000101246	protein_coding	ARFRP1	-1.22941	8.53404e-06
ENSG00000102125	protein_coding	TAZ	-1.22983	4.87031e-06
ENSG00000178093	protein_coding	TSSK6	-1.23006	0.000463039
ENSG00000172500	protein_coding	FIBP	-1.23018	2.14078e-05
ENSG00000146066	protein_coding	HIGD2A	-1.23019	0.000102594
ENSG00000147804	protein_coding	SLC39A4	-1.23059	0.00205271
ENSG00000153989	protein_coding	NUS1	-1.23083	0.00550879
ENSG00000132612	protein_coding	VPS4A	-1.23148	1.33566e-06
ENSG00000176208	protein_coding	ATAD5	-1.23182	1.3967e-05
ENSG00000100979	protein_coding	PLTP	-1.23205	2.64067e-05
ENSG00000148180	protein_coding	GSN	-1.2324	9.62532e-06
ENSG00000112210	protein_coding	RAB23	-1.23262	0.00273569
ENSG00000150768	protein_coding	DLAT	-1.23275	0.000941438
ENSG00000177045	protein_coding	SIX5	-1.23344	3.69425e-05
ENSG00000167653	protein_coding	PSCA	-1.23349	0.000529401
ENSG00000122140	protein_coding	MRPS2	-1.23351	0.000236339
ENSG00000126749	protein_coding	EMG1	-1.23365	2.61408e-06
ENSG00000130717	protein_coding	UCK1	-1.23374	8.99802e-06
ENSG00000203837	protein_coding	PNLIPRP3	-1.23403	0.0179971
ENSG00000154174	protein_coding	TOMM70	-1.23403	0.00144878
ENSG00000122783	protein_coding	CYREN	-1.23438	9.49712e-06
ENSG00000165689	protein_coding	ENTR1	-1.23439	0.000124205
ENSG00000132603	protein_coding	NIP7	-1.23445	0.000598037
ENSG00000169567	protein_coding	HINT1	-1.23456	0.000494197
ENSG00000184831	protein_coding	APOO	-1.23476	0.000557291
ENSG00000213741	protein_coding	RPS29	-1.23494	0.000128167
ENSG00000020129	protein_coding	NCDN	-1.23581	0.000365471
ENSG00000130702	protein_coding	LAMA5	-1.23593	0.00160854
ENSG00000105971	protein_coding	CAV2	-1.23603	1.19108e-05
ENSG00000173852	protein_coding	DPY19L1	-1.23614	3.68625e-05
ENSG00000170315	protein_coding	UBB	-1.23649	9.25523e-06
ENSG00000178127	protein_coding	NDUFV2	-1.23707	1.68085e-05
ENSG00000159314	protein_coding	ARHGAP27	-1.23727	0.00019628
ENSG00000138744	protein_coding	NAAA	-1.2375	0.000123528
ENSG00000162746	protein_coding	FCRLB	-1.23788	1.34311e-05
ENSG00000243789	protein_coding	JMJD7	-1.2379	0.000184835
ENSG00000102900	protein_coding	NUP93	-1.23856	1.71721e-06
ENSG00000104522	protein_coding	TSTA3	-1.23876	6.85313e-05
ENSG00000142230	protein_coding	SAE1	-1.239	2.21404e-05
ENSG00000000003	protein_coding	TSPAN6	-1.239	0.00140949
ENSG00000160767	protein_coding	FAM189B	-1.23903	1.16717e-05
ENSG00000176946	protein_coding	THAP4	-1.23944	6.85914e-05
ENSG00000117525	protein_coding	F3	-1.23947	2.43726e-05
ENSG00000162244	protein_coding	RPL29	-1.23954	8.0051e-06
ENSG00000171004	protein_coding	HS6ST2	-1.23973	0.000780538
ENSG00000099785	protein_coding	MARCHF2	-1.23986	1.42131e-05
ENSG00000145604	protein_coding	SKP2	-1.24021	4.85623e-05
ENSG00000277462	protein_coding	ZNF670	-1.24087	0.00015242
ENSG00000115446	protein_coding	UNC50	-1.24089	0.000220679
ENSG00000100056	protein_coding	ESS2	-1.24151	0.000213391
ENSG00000214530	protein_coding	STARD10	-1.24186	5.59835e-06
ENSG00000103642	protein_coding	LACTB	-1.24205	0.00193526
ENSG00000117598	protein_coding	PLPPR5	-1.24218	1.13439e-05
ENSG00000069998	protein_coding	HDHD5	-1.24233	3.99004e-06
ENSG00000073536	protein_coding	NLE1	-1.24236	1.98486e-06
ENSG00000004142	protein_coding	POLDIP2	-1.24277	6.71159e-06
ENSG00000141295	protein_coding	SCRN2	-1.24285	0.000263236
ENSG00000013561	protein_coding	RNF14	-1.24288	0.0025703
ENSG00000051128	protein_coding	HOMER3	-1.24297	0.000215609
ENSG00000182220	protein_coding	ATP6AP2	-1.24298	0.00182399
ENSG00000143653	protein_coding	SCCPDH	-1.24328	0.000616559
ENSG00000117475	protein_coding	BLZF1	-1.24384	0.000423965
ENSG00000125967	protein_coding	NECAB3	-1.2445	0.0026912
ENSG00000258315	protein_coding	C17orf49	-1.24456	0.000198637
ENSG00000148672	protein_coding	GLUD1	-1.24462	6.87636e-05
ENSG00000225932	protein_coding	CTAGE4	-1.2449	0.00748436
ENSG00000010256	protein_coding	UQCRC1	-1.2462	5.88398e-06
ENSG00000105974	protein_coding	CAV1	-1.24668	3.56132e-06
ENSG00000081307	protein_coding	UBA5	-1.24675	0.000259651
ENSG00000143106	protein_coding	PSMA5	-1.24702	1.4316e-05
ENSG00000053501	protein_coding	USE1	-1.24771	5.54972e-05
ENSG00000151806	protein_coding	GUF1	-1.24803	0.000217691
ENSG00000196700	protein_coding	ZNF512B	-1.24811	0.000104415
ENSG00000144827	protein_coding	ABHD10	-1.24831	4.84362e-05
ENSG00000177383	protein_coding	MAGEF1	-1.24895	3.01605e-06
ENSG00000008382	protein_coding	MPND	-1.24927	0.0036455
ENSG00000169035	protein_coding	KLK7	-1.24972	0.000132028
ENSG00000179085	protein_coding	DPM3	-1.24993	0.0064466
ENSG00000117791	protein_coding	2020-03-02	-1.25039	0.000145213
ENSG00000272047	protein_coding	GTF2H5	-1.25105	0.000103631
ENSG00000110697	protein_coding	PITPNM1	-1.25112	0.0010282
ENSG00000051180	protein_coding	RAD51	-1.25116	0.0146258
ENSG00000100416	protein_coding	TRMU	-1.25163	3.24115e-05
ENSG00000183617	protein_coding	MRPL54	-1.25172	0.000302077
ENSG00000179950	protein_coding	PUF60	-1.25204	0.000127588
ENSG00000288380	protein_coding	AC118281.1	-1.25248	0.012468
ENSG00000104866	protein_coding	PPP1R37	-1.25251	0.000289827
ENSG00000076826	protein_coding	CAMSAP3	-1.25269	0.000891021
ENSG00000166126	protein_coding	AMN	-1.25284	0.0140239
ENSG00000156162	protein_coding	DPY19L4	-1.2529	4.54068e-05
ENSG00000173409	protein_coding	ARV1	-1.25346	0.000201029
ENSG00000106799	protein_coding	TGFBR1	-1.25361	0.000229676
ENSG00000084207	protein_coding	GSTP1	-1.25439	0.000164266
ENSG00000181284	protein_coding	TMEM102	-1.25469	0.00024996
ENSG00000224531	protein_coding	SMIM13	-1.25476	0.0020313
ENSG00000109321	protein_coding	AREG	-1.25493	0.000933395
ENSG00000136877	protein_coding	FPGS	-1.25583	3.04233e-05
ENSG00000130347	protein_coding	RTN4IP1	-1.25614	2.03261e-05
ENSG00000262664	protein_coding	OVCA2	-1.25632	0.00025125
ENSG00000174132	protein_coding	FAM174A	-1.2566	0.000101394
ENSG00000116685	protein_coding	KIAA2013	-1.25689	0.00111526
ENSG00000115641	protein_coding	FHL2	-1.25703	2.28997e-06
ENSG00000131507	protein_coding	NDFIP1	-1.25715	8.6343e-05
ENSG00000138018	protein_coding	SELENOI	-1.25716	0.00019243
ENSG00000131165	protein_coding	CHMP1A	-1.25738	0.00011685
ENSG00000221823	protein_coding	PPP3R1	-1.25744	0.00121721
ENSG00000166619	protein_coding	BLCAP	-1.25755	1.0953e-06
ENSG00000186106	protein_coding	ANKRD46	-1.25769	0.00432371
ENSG00000103018	protein_coding	CYB5B	-1.25795	1.1326e-06
ENSG00000100196	protein_coding	KDELR3	-1.25808	0.000179119
ENSG00000120437	protein_coding	ACAT2	-1.25826	2.08159e-05
ENSG00000109084	protein_coding	TMEM97	-1.25828	3.60884e-05
ENSG00000011009	protein_coding	LYPLA2	-1.25832	0.000196967
ENSG00000118046	protein_coding	STK11	-1.25845	0.000200449
ENSG00000151778	protein_coding	SERP2	-1.25847	0.000186419
ENSG00000150316	protein_coding	CWC15	-1.2585	7.58348e-05
ENSG00000145945	protein_coding	FAM50B	-1.25869	3.90245e-06
ENSG00000136717	protein_coding	BIN1	-1.25874	1.90563e-05
ENSG00000124299	protein_coding	PEPD	-1.25883	0.00118434
ENSG00000130725	protein_coding	UBE2M	-1.25909	4.94441e-06
ENSG00000179588	protein_coding	ZFPM1	-1.25971	0.000733936
ENSG00000105825	protein_coding	TFPI2	-1.26006	0.000115743
ENSG00000173917	protein_coding	HOXB2	-1.26057	6.90929e-05
ENSG00000243678	protein_coding	NME2	-1.26131	0.000174545
ENSG00000168564	protein_coding	CDKN2AIP	-1.26156	0.000409495
ENSG00000110955	protein_coding	ATP5F1B	-1.26198	6.67336e-05
ENSG00000172270	protein_coding	BSG	-1.2622	0.00173793
ENSG00000160075	protein_coding	SSU72	-1.26257	2.17707e-05
ENSG00000111229	protein_coding	ARPC3	-1.26273	0.000180809
ENSG00000156261	protein_coding	CCT8	-1.2629	0.000196482
ENSG00000118523	protein_coding	CCN2	-1.26346	0.000181912
ENSG00000197345	protein_coding	MRPL21	-1.26361	2.07217e-05
ENSG00000164543	protein_coding	STK17A	-1.26453	0.00293378
ENSG00000135211	protein_coding	TMEM60	-1.26467	0.00296447
ENSG00000186104	protein_coding	CYP2R1	-1.26473	0.00193343
ENSG00000197905	protein_coding	TEAD4	-1.26518	0.00183286
ENSG00000135469	protein_coding	COQ10A	-1.26519	8.17674e-06
ENSG00000124787	protein_coding	RPP40	-1.26535	0.000634177
ENSG00000198832	protein_coding	SELENOM	-1.2654	8.35488e-05
ENSG00000142867	protein_coding	BCL10	-1.26561	0.000311683
ENSG00000162413	protein_coding	KLHL21	-1.26613	8.31273e-05
ENSG00000277075	protein_coding	H2AC8	-1.26659	0.0173956
ENSG00000185238	protein_coding	PRMT3	-1.26678	0.000547761
ENSG00000138074	protein_coding	SLC5A6	-1.26778	1.55348e-05
ENSG00000180448	protein_coding	AC004151.1	-1.26787	7.31728e-06
ENSG00000185000	protein_coding	DGAT1	-1.26805	0.000465836
ENSG00000178695	protein_coding	KCTD12	-1.26813	0.000363798
ENSG00000087460	protein_coding	GNAS	-1.26819	8.27111e-05
ENSG00000102030	protein_coding	NAA10	-1.2684	6.33357e-05
ENSG00000130590	protein_coding	SAMD10	-1.26881	9.40409e-05
ENSG00000109680	protein_coding	TBC1D19	-1.26885	1.90392e-05
ENSG00000167671	protein_coding	UBXN6	-1.26907	6.85303e-05
ENSG00000143761	protein_coding	ARF1	-1.27003	2.30424e-05
ENSG00000185950	protein_coding	IRS2	-1.27022	3.96167e-05
ENSG00000173020	protein_coding	GRK2	-1.27091	1.60435e-05
ENSG00000182993	protein_coding	C12orf60	-1.27097	0.000748032
ENSG00000122958	protein_coding	VPS26A	-1.27121	0.000646412
ENSG00000103269	protein_coding	RHBDL1	-1.2716	0.00048315
ENSG00000186666	protein_coding	BCDIN3D	-1.27164	0.000795975
ENSG00000143499	protein_coding	SMYD2	-1.27198	2.92698e-06
ENSG00000243989	protein_coding	ACY1	-1.27221	0.000317137
ENSG00000213281	protein_coding	NRAS	-1.27241	0.000887616
ENSG00000099246	protein_coding	RAB18	-1.27304	0.00122422
ENSG00000213064	protein_coding	SFT2D2	-1.27304	0.000620059
ENSG00000166133	protein_coding	RPUSD2	-1.27331	9.92818e-05
ENSG00000149196	protein_coding	HIKESHI	-1.27342	7.91741e-05
ENSG00000152700	protein_coding	SAR1B	-1.2735	0.000133531
ENSG00000167487	protein_coding	KLHL26	-1.27373	0.0013128
ENSG00000034693	protein_coding	PEX3	-1.27394	0.00129829
ENSG00000163376	protein_coding	KBTBD8	-1.27425	0.0128731
ENSG00000108344	protein_coding	PSMD3	-1.2745	1.7962e-06
ENSG00000169139	protein_coding	UBE2V2	-1.27467	0.00158646
ENSG00000287542	protein_coding	AC098582.1	-1.27524	0.0147291
ENSG00000186577	protein_coding	SMIM29	-1.27525	0.0014701
ENSG00000168792	protein_coding	ABHD15	-1.27543	0.000383399
ENSG00000136327	protein_coding	NKX2-8	-1.27643	0.00348037
ENSG00000179409	protein_coding	GEMIN4	-1.2765	0.00011574
ENSG00000164855	protein_coding	TMEM184A	-1.27661	9.71226e-05
ENSG00000169714	protein_coding	CNBP	-1.27697	0.00021761
ENSG00000104824	protein_coding	HNRNPL	-1.27728	2.21419e-06
ENSG00000128463	protein_coding	EMC4	-1.27729	2.19077e-06
ENSG00000196151	protein_coding	WDSUB1	-1.27737	0.000202431
ENSG00000242485	protein_coding	MRPL20	-1.2784	8.7825e-05
ENSG00000212123	protein_coding	PRR22	-1.27857	2.86811e-05
ENSG00000099804	protein_coding	CDC34	-1.27859	0.000244167
ENSG00000141499	protein_coding	WRAP53	-1.27861	1.06519e-05
ENSG00000005486	protein_coding	RHBDD2	-1.27867	0.000740791
ENSG00000164306	protein_coding	PRIMPOL	-1.27885	4.54827e-05
ENSG00000182871	protein_coding	COL18A1	-1.27974	0.000186163
ENSG00000148296	protein_coding	SURF6	-1.28061	0.000536106
ENSG00000153292	protein_coding	ADGRF1	-1.28063	0.000118371
ENSG00000135318	protein_coding	NT5E	-1.28142	1.21115e-05
ENSG00000135776	protein_coding	ABCB10	-1.28211	0.00166883
ENSG00000175806	protein_coding	MSRA	-1.28228	2.21441e-05
ENSG00000131100	protein_coding	ATP6V1E1	-1.2825	2.6749e-05
ENSG00000179913	protein_coding	B3GNT3	-1.28294	0.000626444
ENSG00000013275	protein_coding	PSMC4	-1.28337	2.32958e-06
ENSG00000161013	protein_coding	MGAT4B	-1.28367	6.05624e-05
ENSG00000243927	protein_coding	MRPS6	-1.28428	1.59667e-05
ENSG00000055950	protein_coding	MRPL43	-1.28475	0.000745274
ENSG00000114209	protein_coding	PDCD10	-1.2857	0.00370029
ENSG00000135249	protein_coding	RINT1	-1.2862	0.00110805
ENSG00000269335	protein_coding	IKBKG	-1.28673	0.000101379
ENSG00000130332	protein_coding	LSM7	-1.28702	6.85336e-05
ENSG00000100908	protein_coding	EMC9	-1.2872	0.00157188
ENSG00000163507	protein_coding	CIP2A	-1.28743	9.4115e-07
ENSG00000144354	protein_coding	CDCA7	-1.28755	0.000394298
ENSG00000172732	protein_coding	MUS81	-1.28759	2.5331e-05
ENSG00000138071	protein_coding	ACTR2	-1.28759	0.000379369
ENSG00000049656	protein_coding	CLPTM1L	-1.28765	9.43615e-06
ENSG00000118363	protein_coding	SPCS2	-1.28824	8.71673e-05
ENSG00000132341	protein_coding	RAN	-1.2892	7.59968e-05
ENSG00000061938	protein_coding	TNK2	-1.2893	9.57158e-05
ENSG00000101473	protein_coding	ACOT8	-1.28953	2.41481e-05
ENSG00000147471	protein_coding	PLPBP	-1.29007	7.84862e-05
ENSG00000131979	protein_coding	GCH1	-1.29022	0.000731027
ENSG00000161036	protein_coding	LRWD1	-1.29081	7.76699e-05
ENSG00000170584	protein_coding	NUDCD2	-1.29086	0.00138671
ENSG00000032444	protein_coding	PNPLA6	-1.2917	0.000719547
ENSG00000164430	protein_coding	CGAS	-1.29232	0.000499567
ENSG00000203760	protein_coding	CENPW	-1.29287	7.34256e-06
ENSG00000104312	protein_coding	RIPK2	-1.29369	5.9406e-06
ENSG00000184058	protein_coding	TBX1	-1.29381	6.93587e-05
ENSG00000112305	protein_coding	SMAP1	-1.29397	0.000117556
ENSG00000159479	protein_coding	MED8	-1.29443	1.73085e-05
ENSG00000113430	protein_coding	IRX4	-1.29455	0.00276873
ENSG00000134955	protein_coding	SLC37A2	-1.29468	3.86887e-05
ENSG00000158552	protein_coding	ZFAND2B	-1.29474	8.64913e-06
ENSG00000119725	protein_coding	ZNF410	-1.29502	2.41814e-05
ENSG00000181523	protein_coding	SGSH	-1.29561	1.33075e-05
ENSG00000083635	protein_coding	NUFIP1	-1.29573	1.32977e-06
ENSG00000167536	protein_coding	DHRS13	-1.29583	0.0351275
ENSG00000128059	protein_coding	PPAT	-1.29614	0.000389298
ENSG00000105185	protein_coding	PDCD5	-1.2967	2.95517e-05
ENSG00000168118	protein_coding	RAB4A	-1.29716	3.13646e-05
ENSG00000104957	protein_coding	CCDC130	-1.2979	4.76448e-05
ENSG00000120063	protein_coding	GNA13	-1.29798	0.000716768
ENSG00000257594	protein_coding	GALNT4	-1.29813	0.031918
ENSG00000120533	protein_coding	ENY2	-1.29834	6.9593e-05
ENSG00000124209	protein_coding	RAB22A	-1.29855	0.000344168
ENSG00000181924	protein_coding	COA4	-1.29883	0.000101612
ENSG00000136718	protein_coding	IMP4	-1.29902	3.15567e-05
ENSG00000141682	protein_coding	PMAIP1	-1.29962	0.000453222
ENSG00000106278	protein_coding	PTPRZ1	-1.29965	5.98941e-06
ENSG00000101003	protein_coding	GINS1	-1.30021	0.000320912
ENSG00000000460	protein_coding	C1orf112	-1.30029	1.98598e-05
ENSG00000127955	protein_coding	GNAI1	-1.30034	0.000353266
ENSG00000139684	protein_coding	ESD	-1.30064	7.83914e-05
ENSG00000105325	protein_coding	FZR1	-1.30073	0.000386649
ENSG00000183963	protein_coding	SMTN	-1.30107	0.000194182
ENSG00000189051	protein_coding	RNF222	-1.30195	0.000153663
ENSG00000168453	protein_coding	HR	-1.30239	9.36892e-05
ENSG00000117419	protein_coding	ERI3	-1.30251	5.93781e-05
ENSG00000159231	protein_coding	CBR3	-1.30312	0.000366628
ENSG00000064726	protein_coding	BTBD1	-1.30315	0.000714907
ENSG00000197713	protein_coding	RPE	-1.30374	0.000966852
ENSG00000153936	protein_coding	HS2ST1	-1.30382	0.000624864
ENSG00000143382	protein_coding	ADAMTSL4	-1.30391	3.63705e-05
ENSG00000080986	protein_coding	NDC80	-1.30417	0.000139595
ENSG00000131043	protein_coding	AAR2	-1.30466	3.47699e-05
ENSG00000076864	protein_coding	RAP1GAP	-1.30475	6.55121e-05
ENSG00000170802	protein_coding	FOXN2	-1.30519	0.000486537
ENSG00000147394	protein_coding	ZNF185	-1.30521	1.80487e-05
ENSG00000187566	protein_coding	NHLRC1	-1.30669	0.000285782
ENSG00000148384	protein_coding	INPP5E	-1.3067	4.01375e-05
ENSG00000152332	protein_coding	UHMK1	-1.30683	0.00225266
ENSG00000110107	protein_coding	PRPF19	-1.30714	9.19421e-07
ENSG00000013810	protein_coding	TACC3	-1.30724	0.00255722
ENSG00000037757	protein_coding	MRI1	-1.30739	2.67365e-05
ENSG00000143412	protein_coding	ANXA9	-1.30782	0.00377465
ENSG00000213186	protein_coding	TRIM59	-1.30903	4.74384e-05
ENSG00000144655	protein_coding	CSRNP1	-1.3096	0.00130007
ENSG00000174136	protein_coding	RGMB	-1.31005	3.34429e-05
ENSG00000175707	protein_coding	KDF1	-1.31016	2.87355e-05
ENSG00000114491	protein_coding	UMPS	-1.31046	1.10996e-05
ENSG00000186665	protein_coding	C17orf58	-1.31082	0.00042831
ENSG00000103187	protein_coding	COTL1	-1.31092	3.88536e-05
ENSG00000178773	protein_coding	CPNE7	-1.311	0.000389023
ENSG00000130810	protein_coding	PPAN	-1.31128	0.000776667
ENSG00000115365	protein_coding	LANCL1	-1.31129	0.00298367
ENSG00000107669	protein_coding	ATE1	-1.31146	1.62465e-05
ENSG00000137714	protein_coding	FDX1	-1.31161	0.000305423
ENSG00000170260	protein_coding	ZNF212	-1.31163	6.79219e-05
ENSG00000085999	protein_coding	RAD54L	-1.31194	0.0135586
ENSG00000130299	protein_coding	GTPBP3	-1.31386	6.53588e-05
ENSG00000239306	protein_coding	RBM14	-1.31396	0.000137183
ENSG00000196497	protein_coding	IPO4	-1.31399	1.52626e-05
ENSG00000134690	protein_coding	CDCA8	-1.31423	0.00112694
ENSG00000158201	protein_coding	ABHD3	-1.31424	7.69113e-06
ENSG00000204856	protein_coding	FAM216A	-1.31448	9.03932e-05
ENSG00000147119	protein_coding	CHST7	-1.31484	4.37397e-05
ENSG00000140961	protein_coding	OSGIN1	-1.31544	0.000136953
ENSG00000103121	protein_coding	CMC2	-1.31623	2.40151e-05
ENSG00000027847	protein_coding	B4GALT7	-1.31633	4.69763e-05
ENSG00000197299	protein_coding	BLM	-1.31655	0.00351048
ENSG00000049860	protein_coding	HEXB	-1.31732	4.55114e-05
ENSG00000123178	protein_coding	SPRYD7	-1.31748	9.20982e-05
ENSG00000090581	protein_coding	GNPTG	-1.31796	1.03989e-05
ENSG00000100479	protein_coding	POLE2	-1.31806	0.00135745
ENSG00000100532	protein_coding	CGRRF1	-1.31816	0.00160473
ENSG00000091483	protein_coding	FH	-1.31826	3.29831e-05
ENSG00000166797	protein_coding	CIAO2A	-1.3192	3.05689e-06
ENSG00000168061	protein_coding	SAC3D1	-1.31929	0.000578727
ENSG00000178999	protein_coding	AURKB	-1.31952	0.0154872
ENSG00000119705	protein_coding	SLIRP	-1.31956	5.97277e-05
ENSG00000189043	protein_coding	NDUFA4	-1.31995	0.000130247
ENSG00000132394	protein_coding	EEFSEC	-1.31997	0.000139847
ENSG00000134531	protein_coding	EMP1	-1.32048	0.000241975
ENSG00000117480	protein_coding	FAAH	-1.3216	0.00290675
ENSG00000103245	protein_coding	CIAO3	-1.3219	0.000592851
ENSG00000073111	protein_coding	MCM2	-1.32201	0.00436848
ENSG00000144136	protein_coding	SLC20A1	-1.32212	4.20142e-05
ENSG00000067221	protein_coding	STOML1	-1.32242	1.07601e-05
ENSG00000134049	protein_coding	IER3IP1	-1.323	0.00679304
ENSG00000182584	protein_coding	ACTL10	-1.3235	0.0154198
ENSG00000152464	protein_coding	RPP38	-1.32352	3.58861e-05
ENSG00000066322	protein_coding	ELOVL1	-1.32378	8.58848e-07
ENSG00000007520	protein_coding	TSR3	-1.32395	0.00110907
ENSG00000171345	protein_coding	KRT19	-1.32451	0.000353705
ENSG00000105193	protein_coding	RPS16	-1.32511	1.09757e-05
ENSG00000172594	protein_coding	SMPDL3A	-1.32545	0.00233379
ENSG00000148339	protein_coding	SLC25A25	-1.32559	1.83339e-05
ENSG00000139629	protein_coding	GALNT6	-1.32583	3.03313e-06
ENSG00000155393	protein_coding	HEATR3	-1.32593	0.000121678
ENSG00000115255	protein_coding	REEP6	-1.32639	4.72848e-05
ENSG00000101189	protein_coding	MRGBP	-1.32666	1.96314e-05
ENSG00000163472	protein_coding	TMEM79	-1.32669	8.77269e-06
ENSG00000161671	protein_coding	EMC10	-1.32715	7.94552e-06
ENSG00000178966	protein_coding	RMI1	-1.32722	0.0034482
ENSG00000013306	protein_coding	SLC25A39	-1.32734	0.00021063
ENSG00000137285	protein_coding	TUBB2B	-1.32799	1.7912e-05
ENSG00000148824	protein_coding	MTG1	-1.32851	3.50679e-05
ENSG00000198612	protein_coding	COPS8	-1.32893	5.5857e-05
ENSG00000149527	protein_coding	PLCH2	-1.32971	0.000126049
ENSG00000100209	protein_coding	HSCB	-1.32997	0.000202768
ENSG00000183291	protein_coding	SELENOF	-1.33	0.00293063
ENSG00000124074	protein_coding	ENKD1	-1.33005	2.3159e-05
ENSG00000086504	protein_coding	MRPL28	-1.33089	0.000158773
ENSG00000073737	protein_coding	DHRS9	-1.33116	0.00318659
ENSG00000254093	protein_coding	PINX1	-1.33135	6.53827e-06
ENSG00000129480	protein_coding	DTD2	-1.33145	0.00010746
ENSG00000104969	protein_coding	SGTA	-1.33171	0.000117655
ENSG00000274559	protein_coding	CU639417.1	-1.3323	0.0277859
ENSG00000165271	protein_coding	NOL6	-1.33255	1.85919e-05
ENSG00000070785	protein_coding	EIF2B3	-1.33269	9.39249e-06
ENSG00000116213	protein_coding	WRAP73	-1.33334	7.51214e-05
ENSG00000083535	protein_coding	PIBF1	-1.33365	0.000360865
ENSG00000163093	protein_coding	BBS5	-1.33382	0.000136221
ENSG00000138698	protein_coding	RAP1GDS1	-1.33418	4.03455e-05
ENSG00000198898	protein_coding	CAPZA2	-1.33437	0.00207044
ENSG00000197170	protein_coding	PSMD12	-1.33454	0.000717477
ENSG00000155508	protein_coding	CNOT8	-1.33465	0.000564021
ENSG00000171241	protein_coding	SHCBP1	-1.33476	0.000680302
ENSG00000273611	protein_coding	ZNHIT3	-1.33486	0.000451829
ENSG00000102100	protein_coding	SLC35A2	-1.33566	2.16695e-05
ENSG00000033011	protein_coding	ALG1	-1.33566	9.73794e-05
ENSG00000108591	protein_coding	DRG2	-1.3357	8.40248e-05
ENSG00000150756	protein_coding	ATPSCKMT	-1.33615	0.000103003
ENSG00000136444	protein_coding	RSAD1	-1.33689	0.000119706
ENSG00000153885	protein_coding	KCTD15	-1.3369	3.34908e-06
ENSG00000108423	protein_coding	TUBD1	-1.33714	2.3858e-05
ENSG00000133316	protein_coding	WDR74	-1.33725	1.79148e-06
ENSG00000072506	protein_coding	HSD17B10	-1.33729	3.52041e-06
ENSG00000103152	protein_coding	MPG	-1.33746	0.00191115
ENSG00000130669	protein_coding	PAK4	-1.33827	0.000680899
ENSG00000118162	protein_coding	KPTN	-1.33827	1.44061e-06
ENSG00000100410	protein_coding	PHF5A	-1.33929	4.41461e-05
ENSG00000175793	protein_coding	SFN	-1.33953	9.95304e-05
ENSG00000119669	protein_coding	IRF2BPL	-1.33963	1.90189e-05
ENSG00000206140	protein_coding	TMEM191C	-1.3406	0.000162227
ENSG00000105447	protein_coding	GRWD1	-1.34088	5.6947e-05
ENSG00000086666	protein_coding	ZFAND6	-1.34108	0.00420872
ENSG00000203485	protein_coding	INF2	-1.34168	0.000308244
ENSG00000127125	protein_coding	PPCS	-1.34174	0.000186717
ENSG00000123575	protein_coding	FAM199X	-1.34212	0.000292639
ENSG00000021355	protein_coding	SERPINB1	-1.34227	0.000394035
ENSG00000023041	protein_coding	ZDHHC6	-1.34289	3.9917e-05
ENSG00000164332	protein_coding	UBLCP1	-1.34301	0.00608465
ENSG00000127720	protein_coding	METTL25	-1.34313	0.000626054
ENSG00000176194	protein_coding	CIDEA	-1.34315	5.65537e-06
ENSG00000174165	protein_coding	ZDHHC24	-1.34375	1.87188e-06
ENSG00000178381	protein_coding	ZFAND2A	-1.34393	0.000190648
ENSG00000185522	protein_coding	LMNTD2	-1.34401	7.67545e-05
ENSG00000182580	protein_coding	EPHB3	-1.34405	1.43681e-05
ENSG00000101199	protein_coding	ARFGAP1	-1.34409	0.000128842
ENSG00000167985	protein_coding	SDHAF2	-1.34435	0.000175244
ENSG00000168303	protein_coding	MPLKIP	-1.34446	0.000826092
ENSG00000156384	protein_coding	SFR1	-1.34469	0.00208724
ENSG00000184661	protein_coding	CDCA2	-1.34494	0.00120922
ENSG00000116455	protein_coding	WDR77	-1.34538	1.02769e-05
ENSG00000173465	protein_coding	ZNRD2	-1.34561	0.00422179
ENSG00000170445	protein_coding	HARS1	-1.34723	8.73789e-06
ENSG00000121864	protein_coding	ZNF639	-1.3473	0.00398733
ENSG00000244274	protein_coding	DBNDD2	-1.34785	1.43332e-05
ENSG00000242110	protein_coding	AMACR	-1.3488	5.92436e-05
ENSG00000143889	protein_coding	HNRNPLL	-1.34882	4.60269e-05
ENSG00000109180	protein_coding	OCIAD1	-1.34894	0.000213825
ENSG00000033050	protein_coding	ABCF2	-1.34909	7.69567e-06
ENSG00000102753	protein_coding	KPNA3	-1.34974	0.000611894
ENSG00000133997	protein_coding	MED6	-1.34986	0.000200787
ENSG00000280433	protein_coding	FP565260.6	-1.34992	0.000913896
ENSG00000116096	protein_coding	SPR	-1.35015	0.0010974
ENSG00000127884	protein_coding	ECHS1	-1.35025	0.000102537
ENSG00000185730	protein_coding	ZNF696	-1.35172	1.0836e-05
ENSG00000104904	protein_coding	OAZ1	-1.35207	2.23744e-05
ENSG00000072849	protein_coding	DERL2	-1.35251	0.000340524
ENSG00000170632	protein_coding	ARMC10	-1.35361	0.000959856
ENSG00000116661	protein_coding	FBXO2	-1.35457	0.000516035
ENSG00000119414	protein_coding	PPP6C	-1.35502	0.000374688
ENSG00000116871	protein_coding	MAP7D1	-1.35542	0.000160169
ENSG00000170634	protein_coding	ACYP2	-1.35542	2.86647e-05
ENSG00000178184	protein_coding	PARD6G	-1.35552	7.67885e-07
ENSG00000122691	protein_coding	TWIST1	-1.35558	0.000244688
ENSG00000183010	protein_coding	PYCR1	-1.35604	0.000113599
ENSG00000198668	protein_coding	CALM1	-1.3571	6.55835e-06
ENSG00000164587	protein_coding	RPS14	-1.35786	3.98218e-05
ENSG00000117151	protein_coding	CTBS	-1.35836	7.16485e-05
ENSG00000125503	protein_coding	PPP1R12C	-1.35903	0.000142304
ENSG00000166788	protein_coding	SAAL1	-1.35905	1.74323e-05
ENSG00000092208	protein_coding	GEMIN2	-1.35923	0.000523519
ENSG00000170571	protein_coding	EMB	-1.35937	0.000104916
ENSG00000104221	protein_coding	BRF2	-1.35948	4.52036e-05
ENSG00000183474	protein_coding	GTF2H2C	-1.35967	0.000244249
ENSG00000104341	protein_coding	LAPTM4B	-1.36061	5.24831e-05
ENSG00000159147	protein_coding	DONSON	-1.3607	7.24473e-06
ENSG00000109805	protein_coding	NCAPG	-1.36148	0.00327075
ENSG00000139505	protein_coding	MTMR6	-1.36178	0.00109522
ENSG00000178605	protein_coding	GTPBP6	-1.36211	0.000128581
ENSG00000250317	protein_coding	SMIM20	-1.36224	7.90812e-05
ENSG00000239857	protein_coding	GET4	-1.36276	1.64831e-05
ENSG00000189376	protein_coding	C8orf76	-1.36318	0.000450284
ENSG00000092036	protein_coding	HAUS4	-1.36372	0.00137595
ENSG00000167754	protein_coding	KLK5	-1.36429	0.000961827
ENSG00000164933	protein_coding	SLC25A32	-1.36441	0.000893964
ENSG00000188725	protein_coding	SMIM15	-1.36462	0.0045539
ENSG00000108602	protein_coding	ALDH3A1	-1.36489	0.0293358
ENSG00000170425	protein_coding	ADORA2B	-1.3651	0.00111638
ENSG00000240857	protein_coding	RDH14	-1.36643	0.000158544
ENSG00000168116	protein_coding	KIAA1586	-1.36648	0.00323118
ENSG00000198843	protein_coding	SELENOT	-1.36667	0.0009637
ENSG00000130731	protein_coding	METTL26	-1.36725	0.000383672
ENSG00000189077	protein_coding	TMEM120A	-1.3677	5.82136e-05
ENSG00000182108	protein_coding	DEXI	-1.3679	1.11119e-05
ENSG00000112208	protein_coding	BAG2	-1.36834	0.0006839
ENSG00000158042	protein_coding	MRPL17	-1.36839	0.00011714
ENSG00000100075	protein_coding	SLC25A1	-1.36859	5.53177e-05
ENSG00000099330	protein_coding	OCEL1	-1.36896	1.92286e-05
ENSG00000090487	protein_coding	SPG21	-1.36901	2.82032e-05
ENSG00000133101	protein_coding	CCNA1	-1.36917	8.274e-06
ENSG00000129757	protein_coding	CDKN1C	-1.36938	5.12391e-05
ENSG00000185163	protein_coding	DDX51	-1.37029	4.07293e-06
ENSG00000125731	protein_coding	SH2D3A	-1.37073	2.35666e-05
ENSG00000179832	protein_coding	MROH1	-1.37108	0.000307476
ENSG00000188566	protein_coding	NDOR1	-1.3716	2.36799e-05
ENSG00000053900	protein_coding	ANAPC4	-1.37171	0.00232704
ENSG00000106803	protein_coding	SEC61B	-1.3729	1.06406e-05
ENSG00000184277	protein_coding	TM2D3	-1.37292	0.000592002
ENSG00000184436	protein_coding	THAP7	-1.3737	4.56977e-05
ENSG00000163344	protein_coding	PMVK	-1.37437	4.11964e-05
ENSG00000198522	protein_coding	GPN1	-1.37458	5.52358e-06
ENSG00000104331	protein_coding	IMPAD1	-1.37465	8.29539e-06
ENSG00000197632	protein_coding	SERPINB2	-1.37469	0.000416415
ENSG00000109674	protein_coding	NEIL3	-1.37481	0.00337423
ENSG00000058453	protein_coding	CROCC	-1.37539	0.000170356
ENSG00000198517	protein_coding	MAFK	-1.3761	0.000277596
ENSG00000089006	protein_coding	SNX5	-1.37679	2.91346e-05
ENSG00000143815	protein_coding	LBR	-1.37694	4.83075e-06
ENSG00000100162	protein_coding	CENPM	-1.37701	0.00250127
ENSG00000038274	protein_coding	MAT2B	-1.37747	0.000360079
ENSG00000115946	protein_coding	PNO1	-1.37749	0.000198202
ENSG00000101412	protein_coding	E2F1	-1.37869	0.000774659
ENSG00000119431	protein_coding	HDHD3	-1.37887	0.000350244
ENSG00000043039	protein_coding	BARX2	-1.37962	3.7432e-05
ENSG00000164647	protein_coding	STEAP1	-1.38026	0.000180916
ENSG00000196154	protein_coding	S100A4	-1.38053	0.00307156
ENSG00000198176	protein_coding	TFDP1	-1.38053	3.13311e-06
ENSG00000213920	protein_coding	MDP1	-1.38091	0.00038296
ENSG00000118246	protein_coding	FASTKD2	-1.38125	0.000388477
ENSG00000070950	protein_coding	RAD18	-1.38147	3.63507e-06
ENSG00000112306	protein_coding	RPS12	-1.38154	0.000184383
ENSG00000173726	protein_coding	TOMM20	-1.38169	8.36429e-05
ENSG00000159377	protein_coding	PSMB4	-1.38196	5.48864e-07
ENSG00000160360	protein_coding	GPSM1	-1.38288	8.29094e-05
ENSG00000118564	protein_coding	FBXL5	-1.38308	0.00110879
ENSG00000169976	protein_coding	SF3B5	-1.38333	8.61566e-05
ENSG00000031691	protein_coding	CENPQ	-1.38383	0.000274904
ENSG00000108010	protein_coding	GLRX3	-1.38391	0.000149274
ENSG00000108298	protein_coding	RPL19	-1.38397	8.98815e-06
ENSG00000184719	protein_coding	RNLS	-1.38406	8.65896e-05
ENSG00000133302	protein_coding	SLF1	-1.38518	5.79591e-07
ENSG00000197056	protein_coding	ZMYM1	-1.38527	0.010908
ENSG00000101084	protein_coding	RAB5IF	-1.38535	0.000108867
ENSG00000129925	protein_coding	PGAP6	-1.38547	0.000714225
ENSG00000176087	protein_coding	SLC35A4	-1.38554	1.51977e-05
ENSG00000117362	protein_coding	APH1A	-1.38598	1.5743e-06
ENSG00000137414	protein_coding	FAM8A1	-1.38612	0.00069206
ENSG00000108094	protein_coding	CUL2	-1.38662	0.000392774
ENSG00000174886	protein_coding	NDUFA11	-1.38682	0.000506705
ENSG00000244165	protein_coding	P2RY11	-1.3869	0.000690703
ENSG00000250479	protein_coding	CHCHD10	-1.38698	0.000261807
ENSG00000175193	protein_coding	PARL	-1.38741	1.70674e-05
ENSG00000140474	protein_coding	AC091230.1	-1.38754	5.93206e-06
ENSG00000130935	protein_coding	NOL11	-1.38764	0.000222434
ENSG00000181481	protein_coding	RNF135	-1.38806	4.70097e-06
ENSG00000095002	protein_coding	MSH2	-1.38827	2.04319e-06
ENSG00000117335	protein_coding	CD46	-1.3883	0.000228461
ENSG00000177917	protein_coding	ARL6IP6	-1.38846	0.000117595
ENSG00000161513	protein_coding	FDXR	-1.38847	0.000329139
ENSG00000115317	protein_coding	HTRA2	-1.38848	5.96398e-05
ENSG00000203896	protein_coding	LIME1	-1.38933	0.00737972
ENSG00000143476	protein_coding	DTL	-1.38953	0.000531724
ENSG00000040487	protein_coding	SLC66A1	-1.39001	7.55006e-05
ENSG00000008130	protein_coding	NADK	-1.39008	2.2349e-06
ENSG00000163788	protein_coding	SNRK	-1.39026	0.000196982
ENSG00000161980	protein_coding	POLR3K	-1.39038	1.55957e-05
ENSG00000126461	protein_coding	SCAF1	-1.39091	0.000119796
ENSG00000105254	protein_coding	TBCB	-1.3913	1.8468e-05
ENSG00000053372	protein_coding	MRTO4	-1.39169	6.80339e-06
ENSG00000187583	protein_coding	PLEKHN1	-1.39192	0.00015682
ENSG00000163382	protein_coding	NAXE	-1.39216	7.27367e-06
ENSG00000138621	protein_coding	PPCDC	-1.39306	0.000872912
ENSG00000105640	protein_coding	RPL18A	-1.3931	0.000674368
ENSG00000169733	protein_coding	RFNG	-1.3943	0.000499289
ENSG00000104960	protein_coding	PTOV1	-1.39438	6.39516e-05
ENSG00000170270	protein_coding	GON7	-1.39454	0.00294411
ENSG00000186352	protein_coding	ANKRD37	-1.39471	0.00051485
ENSG00000136891	protein_coding	TEX10	-1.39545	6.16536e-06
ENSG00000129451	protein_coding	KLK10	-1.3959	0.000319538
ENSG00000241945	protein_coding	PWP2	-1.39614	2.52103e-06
ENSG00000169738	protein_coding	DCXR	-1.39619	2.45934e-05
ENSG00000148803	protein_coding	FUOM	-1.39664	0.00105559
ENSG00000089053	protein_coding	ANAPC5	-1.39696	1.88213e-05
ENSG00000198056	protein_coding	PRIM1	-1.39751	0.000173721
ENSG00000135272	protein_coding	MDFIC	-1.39768	6.85341e-05
ENSG00000164919	protein_coding	COX6C	-1.39783	0.00145263
ENSG00000060069	protein_coding	CTDP1	-1.39861	9.08641e-05
ENSG00000196456	protein_coding	ZNF775	-1.39962	0.000594547
ENSG00000186063	protein_coding	AIDA	-1.39963	0.000134882
ENSG00000196230	protein_coding	TUBB	-1.40048	2.33041e-06
ENSG00000184574	protein_coding	LPAR5	-1.40284	5.20087e-06
ENSG00000141391	protein_coding	PRELID3A	-1.40302	0.000717699
ENSG00000162066	protein_coding	AMDHD2	-1.40324	0.000441939
ENSG00000163633	protein_coding	C4orf36	-1.40376	0.00184046
ENSG00000125458	protein_coding	NT5C	-1.40424	1.94235e-05
ENSG00000141030	protein_coding	COPS3	-1.40502	1.82703e-05
ENSG00000136950	protein_coding	ARPC5L	-1.40552	3.9502e-05
ENSG00000106399	protein_coding	RPA3	-1.40578	4.11304e-05
ENSG00000198015	protein_coding	MRPL42	-1.40593	0.000119507
ENSG00000112118	protein_coding	MCM3	-1.40701	0.000298137
ENSG00000169184	protein_coding	MN1	-1.40704	3.33082e-05
ENSG00000238227	protein_coding	TMEM250	-1.4086	0.000777516
ENSG00000112110	protein_coding	MRPL18	-1.40882	1.61381e-06
ENSG00000103502	protein_coding	CDIPT	-1.40932	0.000122413
ENSG00000151287	protein_coding	TEX30	-1.41019	0.00195283
ENSG00000122376	protein_coding	SHLD2	-1.4106	0.000130206
ENSG00000112578	protein_coding	BYSL	-1.41069	1.64718e-06
ENSG00000187866	protein_coding	FAM122A	-1.41082	0.000477706
ENSG00000137310	protein_coding	TCF19	-1.41125	0.00401382
ENSG00000133657	protein_coding	ATP13A3	-1.41151	0.000167483
ENSG00000153485	protein_coding	TMEM251	-1.4123	0.000190071
ENSG00000160214	protein_coding	RRP1	-1.41269	4.92946e-06
ENSG00000085872	protein_coding	CHERP	-1.41405	0.000848253
ENSG00000013563	protein_coding	DNASE1L1	-1.41421	2.50191e-05
ENSG00000241685	protein_coding	ARPC1A	-1.41428	2.6625e-05
ENSG00000078902	protein_coding	TOLLIP	-1.41504	3.11458e-06
ENSG00000163319	protein_coding	MRPS18C	-1.41512	0.00025307
ENSG00000179958	protein_coding	DCTPP1	-1.41552	1.63424e-06
ENSG00000185721	protein_coding	DRG1	-1.41591	2.78151e-06
ENSG00000008283	protein_coding	CYB561	-1.4168	7.17796e-06
ENSG00000136159	protein_coding	NUDT15	-1.41727	4.68407e-06
ENSG00000139173	protein_coding	TMEM117	-1.41728	0.000769462
ENSG00000117318	protein_coding	ID3	-1.41772	3.55417e-05
ENSG00000197114	protein_coding	ZGPAT	-1.41846	0.00173853
ENSG00000169193	protein_coding	CCDC126	-1.4191	0.00222226
ENSG00000203722	protein_coding	RAET1G	-1.4193	6.95719e-06
ENSG00000100575	protein_coding	TIMM9	-1.41936	8.36073e-06
ENSG00000108179	protein_coding	PPIF	-1.41957	2.7359e-05
ENSG00000122644	protein_coding	ARL4A	-1.41979	0.000260714
ENSG00000110717	protein_coding	NDUFS8	-1.42014	0.000330792
ENSG00000204389	protein_coding	HSPA1A	-1.42065	0.00238592
ENSG00000168078	protein_coding	PBK	-1.42098	0.000996091
ENSG00000172725	protein_coding	CORO1B	-1.42117	0.000946271
ENSG00000129625	protein_coding	REEP5	-1.42209	1.5799e-06
ENSG00000126391	protein_coding	FRMD8	-1.42218	0.00027751
ENSG00000105202	protein_coding	FBL	-1.42315	4.46756e-05
ENSG00000027001	protein_coding	MIPEP	-1.42319	5.57317e-06
ENSG00000111012	protein_coding	CYP27B1	-1.42362	0.000604533
ENSG00000140830	protein_coding	TXNL4B	-1.42377	2.068e-06
ENSG00000138095	protein_coding	LRPPRC	-1.42404	0.000357494
ENSG00000112237	protein_coding	CCNC	-1.42408	0.00226945
ENSG00000132475	protein_coding	H3-3B	-1.42456	6.45102e-05
ENSG00000112977	protein_coding	DAP	-1.42551	9.35061e-06
ENSG00000150991	protein_coding	UBC	-1.42633	8.63952e-07
ENSG00000170899	protein_coding	GSTA4	-1.4264	0.00135056
ENSG00000127528	protein_coding	KLF2	-1.42647	0.000847579
ENSG00000157379	protein_coding	DHRS1	-1.42659	7.87356e-05
ENSG00000122034	protein_coding	GTF3A	-1.42692	1.94218e-06
ENSG00000159228	protein_coding	CBR1	-1.42786	2.44338e-05
ENSG00000102978	protein_coding	POLR2C	-1.42844	2.40644e-05
ENSG00000173418	protein_coding	NAA20	-1.42848	6.49881e-06
ENSG00000072958	protein_coding	AP1M1	-1.42893	1.81987e-05
ENSG00000189159	protein_coding	JPT1	-1.42896	1.48376e-06
[truncated: 1,391 more rows]
