# Supplementary material for: Protein Coding and Long Noncoding RNA (lncRNA) Transcriptional Landscape in SARS-CoV-2 Infected Bronchial Epithelial Cells Highlight a Role for Interferon and Inflammatory Response
Source: Genes (Basel). 2020 Jul 7;11(7):760. doi: 10.3390/genes11070760 (PMC7397219; doi:10.3390/genes11070760)
Supplement: Supplementary file 1 [file genes-11-00760-s001.zip › Supplementary table 3.xlsx]

## Sheet: Clustering-MarkerGenes_correlat
Supplementary table 3. Clustering marker gene correlations for SARS-CoV-2 infected and control NHBE cells
column_clusters-flat
NHBE-mock:ENSG00000181019 NQO1
NHBE-mock:ENSG00000128973 CLN6
NHBE-mock:ENSG00000102900 NUP93
NHBE-mock:ENSG00000150433 TMEM218
NHBE-mock:ENSG00000163507 KIAA1524
NHBE-mock:ENSG00000138182 KIF20B
NHBE-mock:ENSG00000132507 EIF5A
NHBE-mock:ENSG00000178057 NDUFAF3
NHBE-mock:ENSG00000148308 GTF3C5
NHBE-mock:ENSG00000137513 NARS2
NHBE-mock:ENSG00000129354 AP1M2
NHBE-mock:ENSG00000213551 DNAJC9
NHBE-mock:ENSG00000064490 RFXANK
NHBE-mock:ENSG00000106484 MEST
NHBE-mock:ENSG00000177556 ATOX1
NHBE-mock:ENSG00000166619 BLCAP
NHBE-mock:ENSG00000128191 DGCR8
NHBE-mock:ENSG00000178184 PARD6G
NHBE-mock:ENSG00000214706 IFRD2
NHBE-mock:ENSG00000135404 CD63
NHBE-mock:ENSG00000141543 EIF4A3
NHBE-mock:ENSG00000189159 HN1
NHBE-mock:ENSG00000120699 EXOSC8
NHBE-mock:ENSG00000137054 POLR1E
NHBE-mock:ENSG00000137440 FGFBP1
NHBE-mock:ENSG00000081692 JMJD4
NHBE-mock:ENSG00000105983 LMBR1
NHBE-mock:ENSG00000143543 JTB
NHBE-mock:ENSG00000172009 THOP1
NHBE-mock:ENSG00000163875 MEAF6
NHBE-mock:ENSG00000176340 COX8A
NHBE-mock:ENSG00000183287 CCBE1
NHBE-mock:ENSG00000204316 MRPL38
NHBE-mock:ENSG00000105568 PPP2R1A
NHBE-mock:ENSG00000105677 TMEM147
NHBE-mock:ENSG00000128422 KRT17
NHBE-mock:ENSG00000161653 NAGS
NHBE-mock:ENSG00000169583 CLIC3
NHBE-mock:ENSG00000147535 PPAPDC1B
NHBE-mock:ENSG00000168003 SLC3A2
NHBE-mock:ENSG00000159377 PSMB4
NHBE-mock:ENSG00000066322 ELOVL1
NHBE-mock:ENSG00000110107 PRPF19
NHBE-mock:ENSG00000056972 TRAF3IP2
NHBE-mock:ENSG00000116649 SRM
NHBE-mock:ENSG00000133466 C1QTNF6
NHBE-mock:ENSG00000164117 FBXO8
NHBE-mock:ENSG00000224051 GLTPD1
NHBE-mock:ENSG00000101460 MAP1LC3A
NHBE-mock:ENSG00000164032 H2AFZ
NHBE-mock:ENSG00000153044 CENPH
NHBE-mock:ENSG00000138101 DTNB
NHBE-mock:ENSG00000186832 KRT16
NHBE-mock:ENSG00000086475 SEPHS1
NHBE-mock:ENSG00000106400 ZNHIT1
NHBE-mock:ENSG00000226479 TMEM185B
NHBE-mock:ENSG00000132612 VPS4A
NHBE-mock:ENSG00000178053 MLF1
NHBE-mock:ENSG00000134046 MBD2
NHBE-mock:ENSG00000133302 ANKRD32
NHBE-SARS-CoV-2:ENSG00000275740 ENSG00000275740
NHBE-SARS-CoV-2:ENSG00000013374 NUB1
NHBE-SARS-CoV-2:ENSG00000111859 NEDD9
NHBE-SARS-CoV-2:ENSG00000133226 SRRM1
NHBE-SARS-CoV-2:ENSG00000257093 KIAA1147
NHBE-SARS-CoV-2:ENSG00000163125 RPRD2
NHBE-SARS-CoV-2:ENSG00000132466 ANKRD17
NHBE-SARS-CoV-2:ENSG00000112299 VNN1
NHBE-SARS-CoV-2:ENSG00000102287 GABRE
NHBE-SARS-CoV-2:ENSG00000126870 WDR60
NHBE-SARS-CoV-2:ENSG00000107863 ARHGAP21
NHBE-SARS-CoV-2:ENSG00000172493 AFF1
NHBE-SARS-CoV-2:ENSG00000198695 MT-ND6
NHBE-SARS-CoV-2:ENSG00000170004 CHD3
NHBE-SARS-CoV-2:ENSG00000055163 CYFIP2
NHBE-SARS-CoV-2:ENSG00000082074 FYB
NHBE-SARS-CoV-2:ENSG00000214021 TTLL3
NHBE-SARS-CoV-2:ENSG00000146411 SLC2A12
NHBE-SARS-CoV-2:ENSG00000012822 CALCOCO1
NHBE-SARS-CoV-2:ENSG00000169429 IL8
NHBE-SARS-CoV-2:ENSG00000175164 ABO
NHBE-SARS-CoV-2:ENSG00000090339 ICAM1
NHBE-SARS-CoV-2:ENSG00000135976 ANKRD36
NHBE-SARS-CoV-2:ENSG00000173821 RNF213
NHBE-SARS-CoV-2:ENSG00000228253 MT-ATP8
NHBE-SARS-CoV-2:ENSG00000048707 VPS13D
NHBE-SARS-CoV-2:ENSG00000170581 STAT2
NHBE-SARS-CoV-2:ENSG00000152818 UTRN
NHBE-SARS-CoV-2:ENSG00000124508 BTN2A2
NHBE-SARS-CoV-2:ENSG00000121769 FABP3
NHBE-SARS-CoV-2:ENSG00000238083 LRRC37A2
NHBE-SARS-CoV-2:ENSG00000173193 PARP14
NHBE-SARS-CoV-2:ENSG00000128335 APOL2
NHBE-SARS-CoV-2:ENSG00000205744 DENND1C
NHBE-SARS-CoV-2:ENSG00000158315 RHBDL2
NHBE-SARS-CoV-2:ENSG00000167996 FTH1
NHBE-SARS-CoV-2:ENSG00000213928 IRF9
NHBE-SARS-CoV-2:ENSG00000115414 FN1
NHBE-SARS-CoV-2:ENSG00000250067 YJEFN3
NHBE-SARS-CoV-2:ENSG00000101040 ZMYND8
NHBE-SARS-CoV-2:ENSG00000073614 KDM5A
NHBE-SARS-CoV-2:ENSG00000033327 GAB2
NHBE-SARS-CoV-2:ENSG00000135821 GLUL
NHBE-SARS-CoV-2:ENSG00000138433 CIR1
NHBE-SARS-CoV-2:ENSG00000100028 SNRPD3
NHBE-SARS-CoV-2:ENSG00000186470 BTN3A2
NHBE-SARS-CoV-2:ENSG00000167080 B4GALNT2
NHBE-SARS-CoV-2:ENSG00000128849 CGNL1
NHBE-SARS-CoV-2:ENSG00000281593 ENSG00000281593
NHBE-SARS-CoV-2:ENSG00000188559 RALGAPA2
NHBE-SARS-CoV-2:ENSG00000159167 STC1
NHBE-SARS-CoV-2:ENSG00000275954 ENSG00000275954
NHBE-SARS-CoV-2:ENSG00000109790 KLHL5
NHBE-SARS-CoV-2:ENSG00000078081 LAMP3
NHBE-SARS-CoV-2:ENSG00000125735 TNFSF14
NHBE-SARS-CoV-2:ENSG00000100342 APOL1
NHBE-SARS-CoV-2:ENSG00000283765 ENSG00000283765
NHBE-SARS-CoV-2:ENSG00000249240 AC069368.3
NHBE-SARS-CoV-2:ENSG00000183111 ARHGEF37
NHBE-SARS-CoV-2:ENSG00000132530 XAF1
