# Supplementary material for: Protein Coding and Long Noncoding RNA (lncRNA) Transcriptional Landscape in SARS-CoV-2 Infected Bronchial Epithelial Cells Highlight a Role for Interferon and Inflammatory Response
Source: Genes (Basel). 2020 Jul 7;11(7):760. doi: 10.3390/genes11070760 (PMC7397219; doi:10.3390/genes11070760)
Supplement: Supplementary file 1 [file genes-11-00760-s001.zip › Supplementary table 4.xlsx]

## Sheet: Sheet0
Supplementary table 4. Affected canonical pathways based on IPA analysis of differentially expressed mRNAs in SARS-CoV-2 infected NHBE cells.
Ingenuity Canonical Pathways	-log(p-value)	Ratio	z-score	p value	Molecules
NER Pathway	7.96	0.392	-2.333	0.00401607	CCNH,COPS2,COPS3,COPS5,COPS7A,COPS8,ERCC1,GPS1,GTF2H2,GTF2H4,GTF2H5,H3-3A/H3-3B,H4C11,H4C14,H4C15,PCNA,POLA2,POLD1,POLE2,POLE4,POLR2A,POLR2C,POLR2E,POLR2F,POLR2H,POLR2I,POLR2J2/POLR2J3,POLR2K,POLR2L,PRIM1,PRIM2,RBX1,RFC2,RFC3,RPA2,RPA3,SLC19A1,TCEA1,XAB2,XPA
Oxidative Phosphorylation	13.9	0.481	-3.96	1.25893e-14	ATP5F1A,ATP5F1B,ATP5F1C,ATP5F1D,ATP5F1E,ATP5MC2,ATP5MC3,ATP5ME,ATP5MF,ATP5PD,ATP5PO,COX11,COX4I1,COX5A,COX5B,COX6C,COX7C,COX8A,CYC1,CYCS,DMAC2L,MT-ATP6,MT-CO1,MT-CO2,MT-CO3,MT-CYB,MT-ND1,MT-ND2,MT-ND3,MT-ND4,MT-ND5,NDUFA11,NDUFA2,NDUFA4,NDUFAB1,NDUFB1,NDUFB11,NDUFB2,NDUFB6,NDUFB7,NDUFB8,NDUFS3,NDUFS4,NDUFS7,NDUFS8,NDUFV2,SDHD,UQCR11,UQCRC1,UQCRQ
Cholecystokinin/Gastrin-mediated Signaling	1.58	0.231	-4.082	0.0263027	BCAR1,CREM,GNA13,GNAQ,HRAS,IL18,IL36A,IL36G,IL36RN,MAP2K1,MAP2K3,MAPK12,NRAS,PTGS2,RAC1,RAC3,RALA,RALB,RAP1B,RASD2,RHOB,RHOC,RHOD,RHOG,RHOT2,RRAS2,TNF
Integrin Signaling	2.52	0.234	-4.32	0.00301995	ACTB,ACTG1,ACTR2,ACTR3,ARF1,ARF4,ARF5,ARF6,ARPC1A,ARPC1B,ARPC3,ARPC4,ARPC5,ARPC5L,BCAR1,CAPN10,CAV1,GSN,HRAS,ILKAP,ITGAE,ITGB3,LIMS1,MAP2K1,MAP3K11,MYL12B,MYL5,NEDD9,NRAS,PAK4,PAK6,PPP1CB,RAC1,RAC3,RALA,RALB,RAP1B,RASD2,RHOB,RHOC,RHOD,RHOG,RHOT2,RRAS2,TNK2,TSPAN4,TSPAN6,VASP
IL-8 Signaling	1.44	0.209	-4.333	0.0363078	CCND3,CHUK,CXCL8,EIF4EBP1,GNA13,GNAI1,GNAI3,GNAS,GNB2,GNB4,GNG10,GNG11,GNG5,HRAS,ICAM1,IKBKG,IRAK2,ITGB3,MAP2K1,MAP4K4,MAPK12,MYL12B,NCF2,NRAS,PDGFC,PGF,PLD3,PTGS2,RAC1,RAC3,RALA,RALB,RAP1B,RASD2,RHOB,RHOC,RHOD,RHOG,RHOT2,RRAS2,VASP
Cell Cycle Control of Chromosomal Replication	5.25	0.411	-4.379	5.62341e-06	CDC45,CDC6,CDK1,CDK18,CDK4,CDK9,CDT1,MCM2,MCM3,MCM4,MCM5,MCM6,ORC1,ORC4,ORC5,ORC6,PCNA,POLA2,POLD1,PRIM1,PRIM2,RPA2,RPA3
Actin Nucleation by ARP-WASP Complex	4.4	0.357	-4.379	3.98107e-05	ACTR2,ACTR3,ARPC1A,ARPC1B,ARPC3,ARPC4,ARPC5,ARPC5L,BAIAP2,HRAS,NRAS,PPP1R12C,RAC1,RAC3,RALA,RALB,RAP1B,RASD2,RHOB,RHOC,RHOD,RHOG,RHOT2,RRAS2,VASP
Regulation of Actin-based Motility by Rho	2.36	0.273	-4.379	0.00436516	ACTB,ACTR2,ACTR3,ARHGDIA,ARPC1A,ARPC1B,ARPC3,ARPC4,ARPC5,ARPC5L,BAIAP2,GSN,MYL12B,MYL5,PAK4,PAK6,PPP1CB,RAC1,RAC3,RHOB,RHOC,RHOD,RHOG,RHOT2
Rac Signaling	1.87	0.243	-4.707	0.0134896	ACTR2,ACTR3,ARPC1A,ARPC1B,ARPC3,ARPC4,ARPC5,ARPC5L,BAIAP2,BRK1,CDK5R1,CFL2,CYFIP2,HRAS,MAP2K1,MAP3K11,NCF2,NCKAP1,NRAS,PAK4,PAK6,RAC1,RALA,RALB,RAP1B,RASD2,RRAS2
fMLP Signaling in Neutrophils	2.48	0.261	-5.099	0.00331131	ACTR2,ACTR3,ARPC1A,ARPC1B,ARPC3,ARPC4,ARPC5,ARPC5L,CALM1 (includes others),CALML5,GNAI1,GNAI3,GNAS,GNB2,GNB4,GNG10,GNG11,GNG5,HRAS,MAP2K1,NCF2,NFKBIA,NRAS,PPP3R1,RAC1,RALA,RALB,RAP1B,RASD2,RRAS2
EIF2 Signaling	5.87	0.288	-5.333	1.34896e-06	ACTB,EIF1,EIF1AX,EIF2B3,EIF3F,EIF3M,EIF4A3,FAU,HRAS,MAP2K1,NRAS,PAIP1,PPP1CB,PPP1CC,PTBP1,RALA,RALB,RAP1B,RASD2,RPL10,RPL10A,RPL13,RPL14,RPL15,RPL18,RPL18A,RPL19,RPL22L1,RPL24,RPL26L1,RPL29,RPL3,RPL31,RPL34,RPL39,RPL39L,RPL41,RPL6,RPL7,RPL8,RPLP1,RPLP2,RPS12,RPS14,RPS15,RPS16,RPS18,RPS19,RPS20,RPS21,RPS23,RPS28,RPS29,RPS5,RPS7,RPS8,RPS9,RRAS2,SREBF1,TRIB3,UBA52
D-myo-inositol (1,4,5,6)-Tetrakisphosphate Biosynthesis	1.9	0.235	-5.657	0.0125893	CDC25A,DOT1L,DUSP12,DUSP14,DUSP23,DUSP5,HACD2,ILKAP,IPMK,ITPK1,MDP1,MINPP1,MTMR2,MTMR6,NT5C,NUDT11,NUDT12,NUDT15,NUDT4,PDXP,PGAM5,PPP1CC,PPP1R12C,PPP1R14A,PPP1R14B,PPP1R8,PPP2R5A,PPP2R5B,PPP4C,PTPA,STYX,UBLCP1
D-myo-inositol (3,4,5,6)-tetrakisphosphate Biosynthesis	1.9	0.235	-5.657	0.0125893	CDC25A,DOT1L,DUSP12,DUSP14,DUSP23,DUSP5,HACD2,ILKAP,IPMK,ITPK1,MDP1,MINPP1,MTMR2,MTMR6,NT5C,NUDT11,NUDT12,NUDT15,NUDT4,PDXP,PGAM5,PPP1CC,PPP1R12C,PPP1R14A,PPP1R14B,PPP1R8,PPP2R5A,PPP2R5B,PPP4C,PTPA,STYX,UBLCP1
3-phosphoinositide Degradation	2.21	0.24	-5.667	0.00616595	CDC25A,DOT1L,DUSP12,DUSP14,DUSP23,DUSP5,HACD2,ILKAP,INPP5D,INPP5E,INPP5K,ITPK1,MDP1,MINPP1,MTMR2,MTMR6,NT5C,NUDT11,NUDT12,NUDT15,NUDT4,PDXP,PGAM5,PIP4P2,PPP1CC,PPP1R12C,PPP1R14A,PPP1R14B,PPP1R8,PPP2R5A,PPP2R5B,PPP4C,PTPA,PTPMT1,STYX,UBLCP1
Ephrin Receptor Signaling	2.59	0.242	-5.831	0.0025704	ACTR2,ACTR3,ARPC1A,ARPC1B,ARPC3,ARPC4,ARPC5,ARPC5L,BCAR1,CFL2,EPHA1,EPHA2,EPHB3,FGF1,GNA13,GNA15,GNAI1,GNAI3,GNAQ,GNAS,GNB2,GNB4,GNG10,GNG11,GNG5,GRIN3B,HRAS,MAP2K1,MAP4K4,NGEF,NRAS,PAK4,PAK6,PDGFA,PDGFC,PGF,RAC1,RAC3,RALA,RALB,RAP1B,RASD2,RRAS2
