# Supplementary material for: Protein Coding and Long Noncoding RNA (lncRNA) Transcriptional Landscape in SARS-CoV-2 Infected Bronchial Epithelial Cells Highlight a Role for Interferon and Inflammatory Response
Source: Genes (Basel). 2020 Jul 7;11(7):760. doi: 10.3390/genes11070760 (PMC7397219; doi:10.3390/genes11070760)
Supplement: Supplementary file 1 [file genes-11-00760-s001.zip › Supplementary table 5.xlsx]

## Sheet: Sheet0
Supplementary table 5. Upstream regulator analysis based on IPA anlysis of differentially expressed mRNAs in SARS-CoV-2 infected NHBE cells.
Upstream Regulator	Expr Log Ratio	Molecule Type	Predicted Activation State	Activation z-score	Flags	p-value of overlap	Target Molecules in Dataset	Mechanistic Network
IgG		complex	Activated	5.862	bias	7.38e-06	ALDH3B2,ATP1B3,ATP6V0D1,CD9,CEBPB,CEBPD,CLDN4,CSNK2B,CTSC,DEGS1,DUSP14,EMP1,FGFBP1,FST,GNAS,GUK1,HSPB1,IER2,IFITM1,IL6,INHBA,INPP5D,ISG15,JUND,KLK7,KLK8,KRT10,KRT13,KRT16,KRT18,LGALS1,LGALS3,LGALS7/LGALS7B,PHLDA2,PPIF,PTGS2,SERPINB2,SERPINB7,TNF,TNFAIP3,TRIM16,TUBB2A,UGCG,ZMPSTE24	248 (9)
IFNL1		cytokine	Activated	4.588	bias	6.78e-05	APOL6,BST2,CXCL8,DDX60,GBP1,IFI27,IFI44,IFI44L,IFI6,IFIT1,IFIT2,IFIT3,IFITM1,IL6,IRF9,ISG15,LAMP3,MX1,OAS2,OAS3,PSMB9,STAT2,TRIM22,UBE2L6,XAF1	29 (2)
LONP1		peptidase	Activated	4.464	bias	5.72e-09	ACADS,ATP5F1A,ATP5F1D,COX5A,COX8A,ECI1,ECSIT,ETFB,FASTKD2,GFER,GLUD1,HSPB1,HSPD1,MDH2,MRPL18,MT-ATP6,MT-ATP8,MT-CO1,MT-CO2,MT-CO3,MT-CYB,MT-ND1,MT-ND2,MT-ND3,MT-ND4,MT-ND5,MT-ND6,MTHFD2,NDUFA11,PGAM1,PTGS2,SMDT1,SOD2,TFAM
CST5		other	Activated	4.422	bias	2.05e-11	ABT1,ACAT2,ACYP2,ADRM1,ADSL,AKAP12,ARF6,ARHGAP29,BCAP31,BLOC1S1,BRIX1,C17orf49,CAV1,CHD2,CHD3,CNBP,CNOT8,COPS7A,COPS8,CORO1A,DDT,DNAJB11,EEF1D,EMP3,EPN3,ESRRA,EVPL,FBXO2,FHL1,GAR1,GEMIN7,GRSF1,HNRNPC,HS2ST1,ID3,IGSF9,INTS1,KIF11,LOC102724159/PWP2,LYAR,MAL2,MALSU1,MAP1B,MAP1S,MRM3,MRTO4,NDUFB1,NDUFB7,NDUFC2,NHP2,NIFK,NIP7,NOC3L,NOP53,NT5E,NTHL1,NUDT16L1,PCBP1,PMAIP1,POLR2J2/POLR2J3,PPAN,PPP2R5A,PR…
SPI1		transcription regulator	Activated	4.358	bias	0.000189	CCNA2,CCNB1,CCNB2,CD68,CDK4,E2F1,FTH1,IFI27,IFI44,IFI44L,IFI6,IFIT1,IFIT2,IFIT3,IFITM1,IRF9,ISG15,LAMP3,MT1E,MT1F,MT1G,MT1X,MT2A,MX1,NCF2,PSMB10,PSMB9,TNFSF10,TRIM22,VAV1,VIM
let-7		microRNA	Activated	4.122	bias	0.00408	AURKB,BOP1,CDC25A,CDC34,CEBPD,CLUH,CPSF1,DDX56,DNAJB9,E2F6,FBL,FN1,GAB2,HMGA2,IRS2,ITGB3,MCM2,MRTO4,NRAS,PNO1,PTGS2,RBM38,SKP2,TARBP2,TGFBR1,VIM,XRCC3,ZC3H3,ZNF512B
TRAP1		enzyme	Activated	3.86	bias	0.000234	ATP5F1D,ATP5ME,COX5A,COX5B,COX8A,ECSIT,GFER,HSD17B10,HSPD1,MRPL18,MTHFD2,NDUFA11,PTGS2,SMDT1,TIMM13
KDM5B		transcription regulator	Activated	3.532	bias	2.55e-07	ASF1A,BUB3,CAV1,CCNB1,CDIPT,CDK1,DPY19L1,E2F1,EHD1,EPB41L1,FHL1,FJX1,GAL,GCA,HSD17B8,IARS2,ISG15,ITGB1BP1,MCM2,MCM3,MPC1,MT1E,MT1F,MT1X,NCAPH,NDC80,NEDD9,NMB,OIP5,PBK,PRPS1,PSIP1,RNASET2,SPTSSA,TMEM14A,TNFSF13,TTK,TUBB2A
DAP3		other	Activated	3.464	bias	3.35e-09	MT-ATP6,MT-ATP8,MT-CO1,MT-CO2,MT-CO3,MT-CYB,MT-ND1,MT-ND2,MT-ND3,MT-ND4,MT-ND5,MT-ND6
IFNG		cytokine	Activated	3.377	bias	0.00476	ADORA2B,APOL6,BCL2A1,BST2,BTN3A1,C3,CASP3,CCNA2,CDK4,CGAS,CP,CXCL2,CXCL8,DDX60,DKK1,DRG1,DUOXA2,FANCF,FAS,FASN,GBP1,GCH1,GNA13,GRK2,HLA-A,HLA-G,HSPA1A/HSPA1B,HTRA1,ICAM1,IFI27,IFI44,IFI44L,IFI6,IFIT1,IFIT2,IFIT3,IFITM1,IL18BP,IL32,IL6,IRF9,ISG15,ITGB3,JUNB,LAMP3,MMP1,MMP13,MX1,NCF2,NFKBIA,OAS2,OAS3,PIGR,PMAIP1,POLR2F,PRDX2,PSMB9,PTAFR,PTGS2,RARRES1,RIPK2,SBF1,SDC1,SMTN,SOAT1,SOCS1,SOD2,STAT2,TCIR…	260 (11)
E2F6	-1.144	transcription regulator	Activated	3.162	bias	0.00679	CCNE1,CDC25A,CDC45,CDC6,E2F1,GINS2,GMNN,MCM2,MCM3,MCM5,POLA2,RAD51,RAD51AP1,SRSF1,WDR36
miR-483-3p (miRNAs w/seed CACUCCU)		mature microRNA	Activated	2.946	bias	0.0151	GPSM2,HNRNPA0,IER5,LBR,MGME1,MKI67,PGAM1,PUDP,RAN,RWDD4,SPC25,TMPRSS11E,TVP23B
NUPR1	1.513	transcription regulator	Activated	2.942		0.00222	ABHD15,AGRN,AKAP12,ALG8,AP5M1,AREG,ATAD5,ATPSCKMT,B3GAT3,BLM,C19orf33,C1orf112,C8orf58,CCNA2,CCNB2,CD68,CDCA2,CDCA8,CEBPB,CENPI,CEP170B,CHUK,COA5,COQ10A,CTU1,CXCL3,CXCL5,CXCL8,CYB5B,DIPK2A,DSN1,DUSP5,EGLN1,ENO2,EPGN,ERCC6L,EREG,EXTL2,FAM111B,FGF1,FHL2,FOXD1,FZD8,GAB2,GCH1,GINS1,GPSM2,GSTA4,IFIT2,IRS2,ISCA1,JKAMP,KIF11,KIF18A,KIFC1,LBR,LIF,MCM10,MGME1,MKI67,MKKS,MMP10,MRS2,MT1X,MTFR2,NAAA,NEIL3,NG…
FBXW7		enzyme	Activated	2.744	bias	0.00384	ATP5F1A,CEBPD,ECHS1,FGFBP1,FOXRED1,HSPB1,HSPH1,ITGB3BP,MCAT,MTHFD2,SREBF1,STAT2	40 (2)
TGM2	1.798	enzyme	Activated	2.713	bias	0.0171	ATP1B3,BCL2A1,BIRC3,C12orf29,C3,CAD,CDCA7,COX11,CSRNP1,CXCL8,CXCR5,CYP2R1,DDX60,DNAAF2,EHD1,FARSB,GCA,ICAM3,IFI6,IFIT1,IFIT2,IFIT3,IRF9,ITGB3,MT2A,NCF2,NPC2,OAS2,OAS3,PARP14,PARP9,PNRC1,RNF213,S100A8,SERPINB2,SLC25A15,SLC25A20,SLPI,TIMM8A,TNF,TNFAIP2,TRIM22,TTC27,UBA7,XAF1
ALKBH1	-1.019	enzyme	Activated	2.646	bias	1.93e-05	MT-ATP6,MT-CO1,MT-CO2,MT-CYB,MT-ND2,MT-ND4,MT-ND5
NSUN3		enzyme	Activated	2.646	bias	1.93e-05	MT-ATP6,MT-CO1,MT-CO2,MT-CYB,MT-ND2,MT-ND4,MT-ND5
SMARCB1		transcription regulator	Activated	2.587		0.175	CCNA2,CDC6,CSF1,E2F1,IFITM1,MX1,OAS3
CXCL12		cytokine	Activated	2.562		0.0654	ARPC4,BAD,CDK9,CPSF1,CXCL8,DNAAF4,EXOSC6,FAS,IL6,MAFK,MMP13,NR2F6,RANGAP1,RBM14
CHD1		enzyme	Activated	2.53	bias	7.58e-05	BCL2A1,CCL20,CXCL2,CXCL3,ICAM1,IL6,LIF,PTGS2,SOD2,TNF
OSCAR		other	Activated	2.53	bias	0.0307	CCL20,CXCL2,CXCL3,CXCL5,CXCL8,ICAM1,MMP7,TNF,TNFSF10,TNFSF14
RNY3		other	Activated	2.496	bias	0.000103	DDX60,HES4,IFI44,IFI44L,IFIT1,IFIT3,ISG15,LAMP3,MX1,OAS2,OAS3,SERPING1,XAF1
RAE1		other	Activated	2.449	bias	0.0325	IER5,MARS2,PEX11B,SIAH1,TM2D3,TMEM60
IL17A		cytokine	Activated	2.445	bias	0.0264	BCL2A1,CCL20,CCN2,CD68,COL1A1,CXCL2,CXCL3,CXCL5,CXCL8,HEXB,ICAM1,IL32,IL6,LCN2,NFKBIZ,PTGS2,SOCS1,TNF
miR-296-5p (miRNAs w/seed GGGCCCC)		mature microRNA	Activated	2.4	bias	0.0163	COL1A1,LYPLA2,MAP2K3,MMP1,PCNA,SCRIB
UXT		transcription regulator	Activated	2.382	bias	0.00286	CCNA2,CDC6,CXCL8,ENO2,HPGD,HUS1,KDELR3,KRT18,NCOR1,NFKBIA,TNFAIP3,TTK
STAT1		transcription regulator	Activated	2.371	bias	0.0114	BST2,C1R,C1S,DDX60,FAS,GBP1,GLS,ICAM1,IFI27,IFI44,IFI44L,IFI6,IFIT1,IFIT2,IFIT3,IFITM1,IRF9,ISG15,LY96,MX1,OAS2,OAS3,PARP9,PDCD1LG2,PSMB9,SAA2,SOCS1,TNF,TNFSF10,XAF1
TRPS1		transcription regulator	Activated	2.333	bias	0.0215	AURKB,CCNA2,CCNB2,CDC20,CDK1,FN1,KIF11,SPC25,TGFB2
IRF9	1.401	transcription regulator	Activated	2.236	bias	1.6e-05	GBP1,IFI27,IFIT1,IFIT2,IFIT3,IFITM1,IL6,MX1,OAS2,STAT2
mir-204		microRNA	Activated	2.224		0.0214	CBFB,CXCL2,CXCL8,IL6,SPDEF
I kappa b kinase		complex	Activated	2.216	bias	0.0214	FANCA,FANCF,FANCG,FANCL,RAD51
MRPL12	-2.433	other	Activated	2.2	bias	0.00171	MT-CO1,MT-CO2,MT-ND1,MT-ND2,MT-ND6
IL1B		cytokine	Activated	2.2		1	ANXA9,APOE,BCL2A1,C3,CCL20,CEBPB,COL1A1,CXCL2,CXCL3,CXCL5,CXCL8,EHF,ESRRA,F3,FAS,HEXB,ICAM1,IL18,IL32,IL6,MIF,MMP1,MMP13,MMP7,MT2A,MUC4,NFKBIA,NFKBIZ,PLA2G4A,PLXDC2,PTGS2,SAA1,SERPINA3,SERPINB2,SOD2,SREBF1,TCIM,TNF,UBD,UGCG
NOX4		enzyme	Activated	2.193		0.411	COX4I1,CXCL8,ICAM1,RHOC,TFAM
PRL		cytokine	Activated	2.188	bias	0.0141	BST2,CCL20,CCNB1,DTX3L,IFI44,IFI44L,IFI6,IFIT1,IFIT3,IFITM1,IRF9,ISG15,KRT14,KRT19,KRT5,LAMP3,OAS2,OAS3,PARP14,REC8,STAT2,XAF1
IFNA2		cytokine	Activated	2.163	bias	0.000392	APOL6,BST2,DDX60,FAS,GBP1,IFI27,IFI44,IFI44L,IFI6,IFIT1,IFIT2,IFIT3,IFITM1,IL6,IRF9,ISG15,MT-ATP6,MT-CO2,MX1,OAS2,OAS3,PMAIP1,RB1,SOCS1,TNFSF10,TREX1,UBE2L6	145 (8)
Collagen type II		complex	Activated	2.121	bias	0.0295	CCL20,CXCL2,CXCL3,CXCL5,MMP7,TNF,TNFSF10,TNFSF14
TRIM37		enzyme	Activated	2.121	bias	0.0375	CDT1,CKB,IFIT2,IL36A,PARP9,SFN,SFRP1,TRAF2
CD40LG		cytokine	Activated	2.069	bias	0.0466	ADAM28,ANXA7,BIRC3,CCL20,CCND3,CDKN1B,CXCL8,FAS,GCH1,ICAM1,IL36A,IL6,LAMP3,LTB,NFKBIA,PSMB10,PTGS2,TNF,TNFAIP3,TNFSF9,TRAF4,ZFP36L1
Interferon alpha		group	Activated	2.068	bias	0.0023	APOBEC3F,APOL1,APOL2,BST2,CASP3,CCNA1,CCND3,CDC25A,CGAS,E2F1,EIF1,FBXO6,GBP1,GLS,GNA15,HLA-G,HSPA1A/HSPA1B,IFI27,IFI44,IFI44L,IFI6,IFIT1,IFIT2,IFIT3,IFITM1,IRF9,ISG15,LAMP3,LIF,MRPL17,MX1,NFKBIA,NT5C3A,OAS2,OAS3,PARP14,PARP9,PI4K2B,PSMB9,RB1,RBCK1,RBX1,RNF213,SERPINB1,SGSM3,SPRY4,TLR2,TNF,TNFSF10,TRANK1,TRIM22,UBA7,UBE2L6,UNC93B1	56 (2)
miR-145-5p (and other miRNAs w/seed UCCAGUU)		mature microRNA	Activated	2.05	bias	0.0157	ABRACL,CDK4,CES1,FSCN1,LAMP2,MDFI,MMP1,NDUFA4,POU5F1,VASN
TNFSF14	1.408	cytokine	Activated	2.005	bias	0.000451	ADAM8,BIRC3,CCL20,CXCL3,CXCL5,F2RL1,ICAM1,IL6,INHBA,TNF	123 (6)
NGLY1		enzyme	Inhibited	-2	bias	0.00294	IFI27,IFI44L,IFIT1,IFIT2
TNFRSF18		transmembrane receptor	Inhibited	-2	bias	0.00768	CXCL8,ICAM1,IL6,TNF	120 (6)
THOC5		other	Inhibited	-2	bias	0.0273	COX20,DTD2,METTL21A,TMBIM4
MDGA2		other	Inhibited	-2		0.144	BCL2A1,FAS,IL6,MSH2
NR6A1		ligand-dependent nuclear receptor	Inhibited	-2.177	bias	0.0318	CCND3,GLS,LMNA,POU5F1,VIM
TAP1		transporter	Inhibited	-2.211	bias	0.0214	CXCL8,IFIT1,IL6,MX1,TNF
ZNF281		transcription regulator	Inhibited	-2.219	bias	0.0214	BLM,FANCA,FANCG,XRCC3,XRCC4
SAMHD1		enzyme	Inhibited	-2.219	bias	0.0318	IFI27,IFI6,IL6,NFKBIA,TNF
HELLS	-1.447	enzyme	Inhibited	-2.236	bias	0.00835	CCNA2,CCNB1,CDC6,E2F1,HSPD1,MCM4,PCNA
S100A6	-1.587	transporter	Inhibited	-2.309		0.000483	CCL20,CENPA,CXCL2,CXCL8,DHRS9,EXOSC8,HS3ST1,INHBA,NCAPH,PBK,STC1,TNFAIP3
NEUROG1		transcription regulator	Inhibited	-2.309		0.253	C1S,C3,FABP3,FN1,IL6,INHBA,ITGB3,MARC2,MEST,S100A4,SQOR,TRIM22
EPAS1		transcription regulator	Inhibited	-2.338	bias	0.0328	ABCF2,AKAP12,AREG,CAV1,CCN2,CDC42EP5,CKB,CORO1A,EIF5A,ENO2,FHL1,GLS,ICAM1,IGFBP3,IRS2,NT5E,POU5F1,PTK6,SLC29A1,SLC7A5,SOX15,SPACA6,SPHK1,TAF9B
NANOG		transcription regulator	Inhibited	-2.387		0.234	CDC25A,FGF5,FOSB,FOXA2,FOXH1,FUS,HOPX,HSPA1A/HSPA1B,IER5L,ISL1,LGALS1,MAP1B,NPIPA1 (includes others),PHKG2,PILRB,PRRC2C,S100A6,TBC1D3 (includes others)
CREB1		transcription regulator	Inhibited	-2.391	bias	0.0029	ATP5ME,CCNA1,CCNB1,CDCA8,CEBPD,CXCL8,FN1,FOSB,LAPTM4B,MCM5,MCM6,MKI67,MMP13,PCNA,PLA2G4A,PTGS2,RAD54L,RGS2,SOD2,TNF
NRF1		transcription regulator	Inhibited	-2.433	bias	0.0408	CD47,HPCAL1,PSMC4,PSMD14,PSMD3,PSMD6,VIM
mir-2392		microRNA	Inhibited	-2.439	bias	0.000364	MT-CO1,MT-CO2,MT-CYB,MT-ND2,MT-ND4,MT-ND5
miR-2392 (miRNAs w/seed AGGAUGG)		mature microRNA	Inhibited	-2.441	bias	0.000364	MT-CO1,MT-CO2,MT-CYB,MT-ND2,MT-ND4,MT-ND5
TREM1		transmembrane receptor	Inhibited	-2.505	bias	5.99e-07	ADORA2B,AREG,CCL20,CDK1,CENPU,CFB,CKS2,CSF1,CXCL2,CXCL3,CXCL5,CXCL8,DTL,DUSP14,DUSP4,E2F7,F3,FABP3,GLA,HES1,HES4,HS3ST3B1,HSD3B7,IFIT2,IL36RN,IL6,INHBA,ISG15,LAMP3,LIF,LRFN4,LRRC8C,MAD1L1,MCOLN2,MMP1,MMP10,MT1E,MT1F,MT1M,NT5E,OSGIN1,PHLDA2,PTGS2,RRAD,SERPINB2,STARD4,TBC1D7,TFPI2,TIFA,TMEM158,TNF,TNFSF14,YRDC	231 (7)
TAB1		enzyme	Inhibited	-2.534	bias	5.69e-06	BIRC3,CCL20,CFB,CXCL8,GBP1,GCH1,IFIT1,IL6,MMP13,RGS2,SAA1,TNFSF10,XAF1	127 (7)
OGT		enzyme	Inhibited	-2.55	bias	0.0157	CDKN1B,FASN,KRT18,PSMC4,PSMD14,PSMD3,PSMD6,SKP2,SREBF1,VIM
NR3C1		ligand-dependent nuclear receptor	Inhibited	-2.558	bias	0.0355	ANXA1,APOE,BAG1,BAG2,BCL10,BIN1,BIRC2,BIRC3,BOK,CARD10,CBX4,CDKN1C,CEBPB,CIDEA,CSRNP1,CXCL8,DAPK3,DEAF1,DEDD2,DPP7,DUSP22,EMP1,ENDOG,FADD,FASTKD2,FN1,GLUL,HSD11B1,ICAM1,IFI6,IL18,IL36G,IL6,ING3,INHBA,JUND,LAD1,LTB,MAEA,MAL,NFKBIA,NGFR,NLRP10,OLR1,PAK6,PDCD1LG2,PHLDA2,PLA2G4A,PLEKHF1,POU5F1,PPP2CA,PPP3R1,PRKACB,PSMG2,PTGS2,RGS2,RHOB,RIPK2,RRAGC,RTN4,S100P,SGPP1,SIAH1,SIAH2,SLC19A2,SPPL2B,STK17B,TM…
ELAVL1		other	Inhibited	-2.569	bias	0.0183	ARF5,ARG2,CALM1 (includes others),CCNE1,CDC6,CENPA,DGAT1,GSS,KIF11,KIF18A,NCAPG,NDUFB8,NUF2,PBK,PIGR,PSMB4,PTGS2,RPL13,RPS14,SLC25A11,WEE1
KDM1A		enzyme	Inhibited	-2.569		0.164	ARNTL2,ASF1B,BLM,CCNA2,CENPK,CENPU,COL1A1,DKK1,FASN,FOXA2,KLF2,KRT18,MCM2,MCM3,MCM4,MCM6,MPC2,RARB,SERPINB1,SFRP1,SLC22A3,SREBF1,SUV39H1,SYNPO,TCF19,TRIP13,UHRF1,ZNF367
CLDN7		other	Inhibited	-2.578		1.48e-07	ALDH3A1,APOE,C1S,C3,CCL20,CCN2,CCNA1,CD68,CXCL8,DKK1,DPM3,F3,GLS,H2AC18/H2AC19,IFI44,IFI6,IGFBP7,LAMTOR1,LGALS3,LYSMD2,MT1X,MT2A,MX1,NMU,PKMYT1,PLGRKT,PSMG2,RNASET2,RPL29,RPL34,RPP40,RPS7,RRAS2,SCGB1A1,SERP1,SERPINB1,SERPINB7,SLC25A22,SLC35B1,SLC66A3,SPRR3,TPRG1L,UBE2L6
GPER1		G-protein coupled receptor	Inhibited	-2.591	bias	0.000669	CCN2,CEBPD,DUSP4,DUSP5,ESRRA,FASN,FOSB,IER2,MT1F,MT1G,MT1X,MT2A,NFKBIA,PTGER4,TNF,TNFAIP3
LY6E		other	Inhibited	-2.621		0.0315	CCN2,CXCL8,IL6,IRAK2,NFKBIA,PSCA,TNF
TFEB		transcription regulator	Inhibited	-2.646	bias	0.0315	ARSA,ATP6V1H,CLCN7,GLA,MCOLN1,NAGLU,SGSH
TAL1		transcription regulator	Inhibited	-2.711		0.194	ACOT8,ADCY3,AP4B1,ARSA,ARVCF,BRF1,C3,CCNB1,CCNE1,CENPU,CHRNA5,DSCC1,EEF1E1,GINS1,HELLS,HLA-A,ICAM1,LRR1,MCM2,MCM4,MELK,MEST,MPND,MSLN,MTX1,MVD,NCAPG,NDN,NFKBIZ,OIP5,PGAM5,PTGER4,SERPINB2,STK17A,TNFAIP3,TNFSF10,TUBB4B
FGF7		growth factor	Inhibited	-2.736	bias	0.000281	ADSL,ADSS2,APRT,CAD,CEBPA,CEBPD,FASN,HPRT1,SREBF1
AREG	-1.255	growth factor	Inhibited	-2.769		2.14e-05	AURKB,BSG,C3,CCNA2,CCNB1,CCNB2,CDC20,CDC45,CDCA8,CENPA,DESI2,EMC10,GBP1,H2AC18/H2AC19,H2BC5,IFI6,IFIT2,IFIT3,MKI67,PTAFR,PTGS2,SAE1,STX12,TMC6
E2F1	-1.379	transcription regulator	Inhibited	-2.777	bias	5.57e-08	ALG5,ATG7,AURKB,BMI1,CALM1 (includes others),CASP3,CCNA2,CCNB1,CCND3,CCNE1,CDC20,CDC25A,CDC6,CDCA4,CDK1,CDK4,CDKN1B,CRADD,CTNNBIP1,CYP27B1,DUSP4,DUT,E2F1,EXOSC9,FAS,FEN1,GINS1,GTF2H4,H2AC18/H2AC19,ICAM1,ID3,IGF2,JPT1,LACTB,MAGEF1,MCM10,MCM3,MCM5,MCM6,MSH2,MT1G,NDC80,NFKBIA,PCNA,PMAIP1,POLA2,PPP1R8,PRIM2,PRPSAP1,PSAT1,RAD51,RAD54L,RB1,RFC2,RFC3,RPA3,RPS16,SIVA1,SLC3A2,SRSF2,TK1,TNF,UMPS	313 (7)
SOCS3		phosphatase	Inhibited	-2.779		0.00943	FASN,IFIT1,IFIT2,IL6,MX1,OAS2,PCSK9,SREBF1,TNF	235 (9)
UHRF2		enzyme	Inhibited	-2.828	bias	0.0295	CCNE1,CKB,CRIP2,CSE1L,JAG2,PDCD5,SIVA1,ZNF672
NCOA3		transcription regulator	Inhibited	-2.844	bias	0.000669	CCDC80,CCN2,CCNA2,CCNE1,CDC25A,CDC6,CEBPA,FASN,HES1,LAMP3,PCNA,PTGS2,RARB,SREBF1,TGFB2,XBP1	281 (9)
YAP1		transcription regulator	Inhibited	-2.882	bias	0.0343	AREG,AURKB,CASP3,CCN2,CCNA2,CCNB1,CXCL8,DTYMK,E2F1,H2AX,IL6,MSLN,PMAIP1,PTGS2,SKP2,TK1,VIM
ASPSCR1-TFE3		fusion gene/product	Inhibited	-2.887	bias	0.00241	APOE,APOL2,ATP6V1D,ATP6V1E1,BHLHE41,BIN1,CIB1,DEXI,GABARAPL1,GPNMB,GPRC5B,KLHL21,MFSD5,MREG,NPC2,OSTM1,PEPD,RAB32,RHBDF1,SLC19A2,SLC35F6,SOD2,SUV39H1,THEM6,TMEM70,TMEM8A,UPP1
RC3H1		enzyme	Inhibited	-2.982	bias	1.29e-05	BST2,HSPB1,IFI27,IFI44,IFI44L,IFI6,IFIT1,IFIT2,IFIT3,IFITM1,IRF9,ISG15,MT2A,MX1,OAS2,OAS3,PARP9,STAT2,TNFAIP3
RARA		ligand-dependent nuclear receptor	Inhibited	-3.039		0.023	ARPC5L,CCNA2,CCNC,CCPG1,CD24,CD9,CDK1,CDKN1B,CENPA,CENPM,CENPN,CENPU,CP,CXCL5,CXCL8,ENY2,EPHX4,HELLS,HLA-G,IFI44,IFI44L,KRT5,LGALS1,MAD2L1,MALL,MAP1B,MAP3K10,MND1,NCAPG,NCAPH,NEDD9,PBK,PGLS,PIMREG,PLK4,RARB,RARRES1,SGSM3,SMAD3,UBE2T,UBL3,XBP1,ZNF367
E2f		group	Inhibited	-3.162	bias	7.15e-06	ALG5,CAV1,CCNE1,CDC45,CDC6,CDK1,CYP27B1,EXOSC8,GAS2L1,GINS2,GMNN,GOLT1B,GTF2H4,H4C14,MCM10,MCM2,MCM5,OIP5,PCSK1N,PGRMC1,POLA2,RAD51,RPA3,RPS16,TMEM126A,TMEM126B,TTK,UBE2C
E2F3		transcription regulator	Inhibited	-3.206	bias	8.12e-05	ARPC1A,BMI1,CAV2,CCL20,CCNA1,CCNA2,CCNB1,CD9,CDC25A,CDC6,CDK1,E2F1,FST,H1-2,H2AW,HSPD1,IGF2,INHBA,LBR,MAD2L1,MAL2,MCM4,MT1F,MT1G,MT1X,PCNA,PPP1R8,RB1,S100A8,TAF6L,TK1,TNFAIP2,UBE2C,WFDC2
IL13		cytokine	Inhibited	-3.354		0.0924	ADAM28,ARNTL2,BLVRA,BZW2,C3,CCL20,CCL26,CTNNAL1,CTSC,CXCL5,CXCL8,FKBP1A,FZR1,GAS6,GPNMB,GSN,HPSE,HSD11B1,HTRA1,IL13RA2,MAP3K7CL,MCUR1,MN1,MSMO1,MT1X,NCAPH,NCLN,PDGFC,PDLIM2,PIEZO1,RIPK2,SLC26A6,SOCS1,SPINT2,TGM2,TMC6,TNF
HSP90B1		other	Inhibited	-3.464	bias	0.0015	ARF1,ARF5,EIF5A,PPIF,RAB2A,RPLP2,RPS14,RPS20,SNX3,SSR3,SSR4,TOMM20
IL1RN		cytokine	Inhibited	-3.488	bias	9.59e-06	BTN3A1,CCL20,CXCL8,GBP1,ICAM1,IFI27,IFI44,IFI44L,IFI6,IFIT3,IL18BP,IL32,IL6,IRF9,LAMP3,MMP1,MX1,OAS2,OAS3,PMAIP1,PTGS2,RARRES1,RIPK2,STAT2,TNF,TNFSF10,TRIM22,UBD	175 (10)
CG		complex	Inhibited	-3.565	bias	0.000369	BLM,CDC6,CXCL8,DTL,EMP1,EREG,F2RL1,FAS,FJX1,FST,HMGA2,IGFBP3,IL13RA2,ITGB3,MCM10,MMP1,MRPS6,NR1H2,PKIA,PLAT,PMAIP1,PTGS2,RGS20,SLC20A1,STC1,STEAP1,TFPI2,TIPIN,TMEM158,UPP1	143 (6)
TP73		transcription regulator	Inhibited	-3.581	bias	0.000501	ADORA2B,BAP1,BLZF1,CAMLG,CASP3,CCND3,CDK1,CDKN1B,CDKN1C,COL1A1,COX4I1,CUL2,CXCL2,DHRS3,DIMT1,DRAM1,ECM1,ELOB,ENG,FAS,FASN,FEN1,FGFR3,FST,GAB2,HES1,HSPA1A/HSPA1B,IGFBP3,JAG2,KCNK1,KLHL21,KRT10,NRGN,PIGF,PMAIP1,PNRC1,PPP4R2,RBX1,SFN,SNRK,TP53I3,TWIST1,UBE2D1,UBL3,UCN	240 (5)
BTK		kinase	Inhibited	-3.594		0.000503	BAG1,CCND3,CDC25A,CDK4,CXCL8,E2F1,EMP1,IFI44L,IFIT1,IFIT3,IFITM1,IL6,IRF9,ISG15,MX1,OAS2,OAS3,TNF	250 (6)
FOXM1		transcription regulator	Inhibited	-3.764	bias	0.000693	AURKB,CAV1,CCNA1,CCNA2,CCNB1,CCNB2,CCNE1,CDC20,CDC25A,CDCA2,CDCA8,CDK1,CDKN1B,CENPA,CENPB,CKS2,CTNNAL1,IL6,MMP7,NBN,PCNA,PDGFA,PLK4,PRDX2,SKP2	277 (8)
SMARCA4		transcription regulator	Inhibited	-4.004	bias	0.00228	ABRACL,AHR,AP1S2,AREG,ARL16,ARL4C,C19orf33,CALB2,CCN2,CD47,CDC25A,CDC6,COTL1,CP,CYB5R2,DHRS9,DLL1,DUSP4,E2F1,EDNRA,EHF,EMP3,EPHA1,EREG,EVA1A,F3,FABP6,FAS,FHL2,FN1,FOLR1,GCAT,GCHFR,GJB5,GNAI3,GSTO1,GSTP1,HEXB,HMGA2,HPGD,HS3ST1,HSF1,ICAM1,ID3,IFIT1,IFITM1,IGFBP7,INHBA,KRT18,LGALS1,LGALS3,LMNA,MAP1B,MMP1,MMP7,MN1,MT-ND2,MYL5,NFKBIZ,PCSK9,PERP,PHLDA2,PKIA,PLAT,PSMB9,PTP4A1,RAMP1,RGS2,RHBDL2,S100A6,SE…
ESR1		ligand-dependent nuclear receptor	Inhibited	-4.065		0.00245	ARPC5L,C1QTNF6,C3,CAV1,CAV2,CCL20,CCNA2,CCNE1,CCPG1,CDK1,CEBPA,CEBPB,CEBPD,CENPA,CENPM,CENPN,CENPU,CLIC3,COMT,CP,CXCL3,CXCL8,DLL1,EIF5A,ENY2,EPHX4,EREG,ESRRA,FAS,FST,GJB2,HELLS,HES1,HLA-G,IFI44,IFI44L,IL6,KLK5,KRT13,KRT19,LGALS1,LTB,MAD2L1,MALL,MAP1B,MAPK12,MICOS10,MKI67,MMP1,MND1,NCAPG,NCAPH,NGFR,PBK,PDCD5,PGLS,PIMREG,PLK4,PPP6R2,PTGS2,RGS19,S100P,SEMA3B,SERPINB5,SGSM3,SIAH2,SLC39A8,SLC7A5,SMAD3…	231 (10)
CAB39L		kinase	Inhibited	-4.146	bias	3.7e-08	ATP5F1E,ATP5MC2,ATP5MC3,ATP5ME,ATP5MF,ATP6V1E1,CDKN1B,COX4I1,COX5B,COX6C,COX7C,COX8A,NDUFA4,NDUFB11,NDUFB2,NDUFB8,NDUFC1,NDUFS4,NDUFV2,UQCR11,UQCRQ
SYVN1		transporter	Inhibited	-4.226	bias	0.00178	AHR,ASF1B,ATP1B3,ATP6AP1,CALM1 (includes others),CD151,CD46,CYB561,EPHA2,F3,FANCG,FASN,FOLR1,GNB2,HLA-A,HSPB1,IFI44,IRAK2,NDFIP2,OLR1,PCBP1,PNPLA2,PSMC3,PTBP1,RPL10,RPL18,SLC20A1,SLC27A3,SLC30A1,SLC3A2,SLC7A5,TLE5,TMEM106B,UNC13D,VAMP7
RABL6		other	Inhibited	-4.315	bias	3.42e-06	AURKB,BIK,CCNA2,CCNB1,CDC25A,DRAM1,DUT,FEN1,H2AX,MAD2L1,MCM10,MCM2,MCM5,MELK,NCAPG,NDC80,PBK,PMAIP1,POLD1,POLE2,PRIM1,RFC3,TMEM97,TTK,UBE2C,VRK1	242 (6)
TP63		transcription regulator	Inhibited	-4.349	bias	1.78e-06	ATG5,ATG7,BAD,BLM,BST2,CAD,CASP3,CCNA2,CCND3,CDK1,CDKN1B,CDKN1C,CEBPA,CKS2,CSTA,CXCL8,CYGB,DKK1,DLL1,ECM1,ENG,F3,FAS,FASN,FDXR,FGFR3,FN1,FST,GNAI1,GPNMB,GPX2,HES1,HMGA2,HRAS,HTRA1,ID3,IGFBP3,IGFBP7,IL6,INHBA,KCNG1,KRT10,KRT14,KRT6A,MAD2L1,MCM10,MMP13,MRPL41,NT5E,PCNA,PERP,PI3,PMAIP1,RAD51,S100A4,S100A7,S100A8,SCRIB,SERPINB2,SERPINB5,SFN,SMAD3,SPRR3,TGFB2,THBS2,TIPIN,TNFSF10,VIM,WEE1,WNT4	288 (8)
BRD4		kinase	Inhibited	-4.384	bias	0.0023	AURKB,BDH1,CCNA2,CDC25A,CDC6,CDCA5,CDKN1B,CEBPA,COL1A1,CXCL2,CXCR5,DCTPP1,FN1,GINS1,GTF3C6,ICAM1,KAT2A,LOXL1,MAL,MCM3,MTMR2,PDGFA,PDGFC,PLAT,POLE2,RAC1,SFXN4,SLC16A9,SLC19A1,SRM,THBS2,TTC27,TUBB,XBP1
MAPK1		kinase	Inhibited	-4.436		0.0004	APOL6,BLZF1,BST2,C1S,CCNB1,CFB,CHST7,CRYL1,E2F1,EHD1,ERCC1,FN1,GBP1,GLS,H2AZ2,IFI27,IFI44,IFI6,IFIT1,IFIT2,IFIT3,IFITM1,IRF9,ISG15,KRT17,KRT34,LAMP3,MKI67,NT5E,OAS2,OAS3,OGFR,PLA2G4A,PSMB9,PTGS2,RAD54L,SPAG16,SPRY4,STAT2,TMEM158,TNF,TNFSF10,TRANK1,TRIM22,UBE2L6,UTP18,VIM
MYC		transcription regulator	Inhibited	-5.027	bias	0.00025	AHR,ATAD3B,ATP13A2,BAG1,BMI1,BZW2,CAD,CAV1,CBX4,CCNA1,CCNB1,CCND3,CCNE1,CCT3,CD151,CDC25A,CDC34,CDK4,CDKN1B,CIAO2A,COL1A1,CTDSP1,CTNNAL1,CYFIP2,DCTPP1,E2F1,EXOSC8,FASN,FBL,FBXO32,GLS,GLUD1,H4C14,HSPB1,HSPD1,HSPH1,IFI27,IFI44,IFI44L,IFI6,IFIT1,IFIT2,IFIT3,IRF9,LAMP2,LGALS1,MX1,NBN,NFKBIA,NPM1,ODC1,PERP,PHF21A,PMAIP1,PYCR1,RAD51,RARB,RARRES1,RIOX2,SAE1,SERPINE2,SHMT1,SKP2,SLC25A19,SRSF1,TMEM126A,TM…	116 (3)
MITF		transcription regulator	Inhibited	-5.71	bias	5.95e-07	ALDH16A1,AURKB,CCNB1,CD151,CDCA8,CDT1,CENPH,CENPM,CHTF18,COL1A1,CXCL8,DSN1,FANCA,FANCG,FBXO32,GPRIN1,HMBS,KIFC1,MCM2,MCM4,MCM5,MCM6,MGAT4B,NPM3,NUF2,ORC6,POLD1,POLE2,PPP2CA,RECQL4,RMI1,RPA3,SPC25,TACC3,TDG,UBE2C,UPP1,XRCC3
ERBB2		kinase	Inhibited	-6.145	bias	1.06e-09	CAPN15,CCN2,CCNA2,CCNB1,CCNB2,CCND3,CCNE1,CDC20,CDC25A,CDC45,CDC6,CDCA2,CDCA4,CDCA5,CDCA7,CDCA8,CDK1,CDKN1B,CDT1,CEBPB,CENPA,CHD6,CKS2,CLDN4,COL18A1,COL1A1,CXCL8,E2F1,E2F7,FASN,FN1,FSCN1,GINS1,GINS2,GLO1,HES1,IL6,JUNB,LAMP2,LCN2,MCM10,MCM2,MCM3,MCM4,MCM5,MCM6,MKI67,MMP1,MSMB,NCAPG,NDC80,NEDD9,ORC1,ORC6,PCNA,PDLIM4,POLA2,POLD1,POLDIP2,POLE2,POLE4,POLR2A,POLR2E,POLR2J2/POLR2J3,POLR2L,POLR3GL,POLR3H…	379 (12)
