# Supplementary material for: Protein Coding and Long Noncoding RNA (lncRNA) Transcriptional Landscape in SARS-CoV-2 Infected Bronchial Epithelial Cells Highlight a Role for Interferon and Inflammatory Response
Source: Genes (Basel). 2020 Jul 7;11(7):760. doi: 10.3390/genes11070760 (PMC7397219; doi:10.3390/genes11070760)
Supplement: Supplementary file 1 [file genes-11-00760-s001.zip › Supplementary table 6.xlsx]

## Sheet: Sheet0
Supplementary table 6. Disease and function analysis based on IPA analysis of differentially expressed mRNAs in SARS-CoV-2 infected NHBE cells.
Categories	Diseases or Functions Annotation	p-value	Predicted Activation State	Activation z-score	Molecules	# Molecules
Free Radical Scavenging,Molecular Transport	Quantity of reactive oxygen species	0.00253	Increased	2.513	AKR1B10,CP,CXCL8,CYGB,DPY30,FAS,GGT1,KLF2,LCN2,NCF2,NDUFAB1,NFKBIA,OLR1,OXSM,PBK,PRDX1,PRDX2,PRDX6,RAC1,SERPINB5,SOD2,STK11,STK17A,TNF,TWIST1,TWIST2	26
Cell Death and Survival	Apoptosis of cervical cancer cell lines	0.00553	Increased	2.446	ACER3,ATG5,BAD,BAG1,BCAP31,BCL2A1,BIRC2,BOK,CASP3,CCNB1,CCND3,CDC20,CDC6,CDCA2,CDK1,CDK9,CDKN1B,CDKN2AIP,CEBPA,CENPB,CIDEB,COX5A,E2F1,FADD,FAS,FASTKD2,FKBP8,FST,HRAS,HSF1,IL18,IL32,IL6,ITPK1,KIF11,LGALS7/LGALS7B,LIMS1,LYPLA2,MAD2L1,MAN2C1,MAP2K1,MARC2,MCM10,MCOLN1,MCRS1,MFF,MTMR6,NDC80,NEDD9,NEK7,NFKBIA,NFKBIZ,NIBAN2,NUF2,PAK4,PBK,PDCD6,PDLIM7,PIDD1,PLK4,POU5F1,PRAF2,PRPF19,PTAFR,PUF60,RAB32,RAC1…	84
Cellular Assembly and Organization,DNA Replication, Recombination, and Repair	Formation of nuclear foci	0.0135	Increased	2.403	BLM,BMI1,CCNA2,CCNB1,CCND3,CDC45,CDK1,GMNN,GTF2H2,HRAS,MAD2L2,MGMT,MSH2,NBN,NTHL1,PGAM1,POLD1,RAD54L,RMI1,RNF138,RUVBL2,SHLD2,SLX1A/SLX1B,TACC3,TONSL,UCHL3,XAB2	27
Cell-To-Cell Signaling and Interaction,Hematological System Development and Function,Immune Cell Trafficking,Inflammatory Response	Activation of neutrophils	0.00426	Increased	2.397	ANXA1,CXCL3,CXCL8,F2RL1,FKBP1A,MT-CO1,MT-CYB,MT-ND2,MT-ND3,MT-ND4,MT-ND5,MT-ND6,TNF	13
Cell-To-Cell Signaling and Interaction,Hematological System Development and Function,Immune Cell Trafficking,Inflammatory Response	Activation of peripheral blood neutrophils	2.56e-06	Increased	2.352	ANXA1,CXCL8,MT-CO1,MT-CYB,MT-ND2,MT-ND3,MT-ND4,MT-ND5,MT-ND6	9
Cell Death and Survival	Cell death of tumor cell lines	1.13e-06	Increased	2.325	ABCE1,ACER2,ACER3,ADH5,ADORA2B,ADRM1,AGPAT2,AHR,AIMP2,AKAP12,AKR1B10,APOE,AREG,ARHGDIA,ARMC10,ATG5,ATG7,ATP13A2,ATP1B3,ATP5F1A,AURKB,BAD,BAG1,BAP1,BCAP31,BCAR1,BCAS2,BCL10,BCL2A1,BIK,BIRC2,BIRC3,BLM,BMI1,BOK,BPIFA1,BRAT1,BRINP1,BSG,BUB3,C10orf88,CASP3,CAV1,CAVIN3,CBR1,CCDC80,CCN2,CCNA1,CCNB1,CCND3,CCNE1,CCNG1,CCT2,CD24,CD47,CDC20,CDC25A,CDC34,CDC6,CDCA2,CDCA5,CDK1,CDK5R1,CDK9,CDKN1B,CDKN1C,CDKN2A…	456
Cell Death and Survival	Necrosis	1.16e-05	Increased	2.206	ABCE1,ACER2,ACER3,ADH5,ADORA2B,ADRM1,AFAP1L2,AGPAT2,AHR,AIMP2,AKAP12,AKR1B10,ALDH1A1,ALDH3A1,ANPEP,ANXA1,APOE,APOL1,AREG,ARHGDIA,ARMC10,ARTN,ATG5,ATG7,ATP13A2,ATP1B3,ATP5F1A,AURKB,BAD,BAG1,BAP1,BCAP31,BCAR1,BCAS2,BCL10,BCL2A1,BIK,BIRC2,BIRC3,BLM,BMI1,BOK,BPIFA1,BRAT1,BRINP1,BSG,BUB3,C10orf88,C3,CASP3,CAV1,CAVIN3,CBR1,CCDC80,CCN2,CCNA1,CCNB1,CCND3,CCNE1,CCNG1,CCT2,CD24,CD47,CDC20,CDC25A,CDC34,CDC4…	535
DNA Replication, Recombination, and Repair	DNA damage	0.0023	Increased	2.201	AHR,BUB3,C10orf88,CASP3,CCNE1,CDC6,CDK1,CDK9,CDT1,DESI2,DONSON,E2F1,E2F6,EAF2,ENG,ERCC1,FANCG,FN1,GMNN,GSTP1,H2AX,HAT1,HRAS,MCM10,MCM2,MGMT,MUS81,NUPR1,OLR1,PBK,PCNA,PNKP,POLD1,RAD51,RASSF6,RBX1,RNH1,SIRT6,SIRT7,SOD2,ST6GAL1,TNF,WEE1,ZNF207	44
Cell Cycle	Mitosis of cervical cancer cell lines	7.25e-06	Decreased	-2.008	AJUBA,CCNB1,CCNB2,CDC20,CDC25A,CDCA8,CDK1,CENPB,CENPI,CSE1L,GAK,GNAI3,HMG20B,KIF11,KIF22,MAD2L1,MAP2K1,NDC80,NEK7,NUF2,PDLIM7,PKD1,PKMYT1,PLK4,POU5F1,PPP2CA,PPP2R1A,PTP4A1,RASSF1,RMI2,SETD6,SLC20A1,SPC25,TACC3,TTK,UBA7,UBE2S,WEE1,ZC3HC1	39
Cellular Function and Maintenance	Engulfment of tumor cell lines	0.000979	Decreased	-2.037	ACTR2,ACTR3,ANXA1,ARF6,ARPC3,ARPC4,ATP6AP1,ATP6V0D1,ATP6V1D,ATP6V1E1,BCAR1,BRK1,CCNC,CD47,CEBPB,CLIC3,DEF6,ELOVL1,F2RL1,HRAS,ICAM1,IL6,INPP5D,JUNB,KLF2,LZTR1,NUF2,PIGQ,PIGR,PTRHD1,RAC1,RASA2,RHOB,RHOG,RPS21,RRAS2,RUVBL2,SHARPIN,SLC35A2,SPTSSA,SRSF3,SRSF6,STUB1,TGFBR1,TGM2,TM2D3,TNF,TNFSF10,UBE2D3,VIM,ZMYND8	51
Cellular Growth and Proliferation,Organismal Development	Growth of yeast	0.00839	Decreased	-2.102	ARV1,BCL2A1,BLM,DUSP12,EIF4EBP1,GTPBP3,HSF1,MAP2K1,MECR,POLR2F,POLR2H,POLR2K,POLR2L,PPBP,PPP1CB,PPP1CC,SLC25A5,SLC30A5,TIMM8A,ZMPSTE24	20
Molecular Transport	Export of molecule	0.000669	Decreased	-2.126	ABCB10,ABCB8,ALYREF,APOE,APOL1,CAV1,CP,CPSF1,DDX39A,E2F1,EIF4A3,EIF5A,F2RL1,FADD,FAS,HSF1,IFI27,IL6,LAMTOR1,MAGOHB,NFKBIA,NME2,NPC2,NR1H2,NUP35,NUP37,NUP42,NUP43,NUP54,NUP85,NUP88,NUP93,NXT1,PLTP,RAN,RHCG,RNPS1,SAA1,SEC13,SEH1L,SLBP,SLC25A1,SOAT1,SRRM1,SRSF1,SRSF2,SRSF3,SRSF6,SRSF9,STRADB,STX12,STYX,THOC6,U2AF2,UHMK1,UPF3B	56
Lipid Metabolism,Small Molecule Biochemistry	Fatty acid metabolism	0.0136	Decreased	-2.168	ABCD1,ACAA1,ACOT1,ACOT7,ACOT8,ANXA1,APOE,ARV1,CAV1,CD9,COTL1,CXCL8,CYP2S1,DECR2,DEGS1,DGAT1,EDNRA,ELOVL1,F2RL1,FAAH,FABP3,FADD,FAR1,FAR2,FAS,FASN,FDX1,FH,FN1,GGT1,GPC1,HACD2,HPGD,HSD17B8,HTD2,IGF2,IL18,IL6,ITGB3,LAMTOR1,LIF,LRP1,MAP2K1,MCAT,MDH2,MECR,MIF,MSMO1,NAAA,NFKBIA,NPC2,NR1H2,NUDT19,OLR1,ORAI1,OXSM,PITPNM1,PLA2G4A,PLTP,PPCS,PRDX6,PRELID3A,PRXL2B,PTAFR,PTGES2,PTGES3,PTGS2,SAA1,SLC25A1,SLC25…	91
Cell Signaling	Viral life cycle	0.000216	Decreased	-2.169	APOBEC3F,BST2,CHMP2B,CHMP4A,CHMP6,EED,IFIT1,IFITM1,ISG15,MVB12A,MX1,NUP35,NUP37,NUP42,NUP43,NUP54,NUP85,NUP88,NUP93,OAS3,PIN1,PTGS2,RAN,SEC13,SEH1L,SLPI,TNF,TXN,UBA52,UBB,UBC,VPS28,VPS37B,VPS37D,VPS4A,VTA1	36
Lipid Metabolism,Small Molecule Biochemistry	Synthesis of glycolipid	0.00483	Decreased	-2.184	ALG1,ALG12,ALG2,ALG6,ALG8,ARV1,CD9,DPM2,DPM3,FAS,PIGB,PIGC,PIGP,PYURF,SLC35A2,TNF,UGCG	17
Lipid Metabolism,Small Molecule Biochemistry	Metabolism of glycolipid	0.012	Decreased	-2.184	ALG1,ALG12,ALG2,ALG6,ALG8,ARSA,ARV1,CD9,CLN6,CPTP,DPM2,DPM3,FAS,GLA,GLTP,HEXB,PIGB,PIGC,PIGP,PYURF,SGPP1,SLC35A2,TNF,UGCG	24
DNA Replication, Recombination, and Repair	Excision repair of DNA	3.99e-08	Decreased	-2.19	CCNH,COPS2,COPS3,COPS5,COPS7A,COPS8,ERCC1,FEN1,GPS1,GTF2H2,GTF2H4,GTF2H5,HMGA2,NEIL3,PCNA,PNKP,POLD1,POLR2A,POLR2C,POLR2E,POLR2F,POLR2H,POLR2I,POLR2K,POLR2L,PPIE,PRMT6,PRPF19,RAD51,RBX1,RFC2,RFC3,RPA2,RPA3,TCEA1,TDG,UBA52,UBB,UBC,XAB2,XPA	41
Cellular Function and Maintenance	Internalization by tumor cell lines	0.0119	Decreased	-2.232	ANXA1,ATP6AP1,ATP6V0D1,ATP6V1D,ATP6V1E1,CLIC3,DEF6,F2RL1,HRAS,IL6,INPP5D,KLF2,LGALS3,LRP1,NUF2,PTRHD1,RHOB,RHOG,RPS21,RRAS2,RUVBL2,SHARPIN,SRSF3,TGFBR1,TGM2,TNF,TNFSF10,VIM	28
Gene Expression	Transcription of RNA	0.00288	Decreased	-2.363	ABT1,ACTR2,ACTR3,ACVR1,ADIRF,AFAP1L2,AHR,ALYREF,APOE,ARF4,ARNTL2,ATXN7L3,AURKB,BAD,BAG1,BAP1,BARX2,BCL10,BHLHE41,BIRC2,BLM,BMI1,BRF1,BRF2,BRMS1,BST2,CALCOCO1,CAV1,CBFB,CBX4,CCDC85B,CCN2,CCNB1,CCNC,CCND3,CCNH,CD81,CD9,CDK1,CDK4,CDK5R1,CDK9,CDKN1B,CDKN1C,CEBPA,CEBPB,CEBPD,CEBPG,CHCHD2,CHD2,CHD3,CHMP1A,CHUK,CITED4,CNBP,COL1A1,COP1,COPS2,COPS5,CREG1,CREM,CSE1L,CSRNP1,CTBP1,CTDP1,CTDSP1,CTNNBIP1,CXXC5…	350
Cell Cycle	Mitosis of tumor cell lines	5.44e-06	Decreased	-2.382	AJUBA,ARPC1B,CCNB1,CCNB2,CCNE1,CDC20,CDC25A,CDCA8,CDK1,CENPB,CENPI,CSE1L,GAK,GNAI3,HMG20B,HSF1,IL6,INHBA,KIF11,KIF22,MAD1L1,MAD2L1,MAD2L2,MAP2K1,NAE1,NDC80,NEK7,NUF2,PDLIM7,PKD1,PKMYT1,PLK4,POU5F1,PPP1R12C,PPP2CA,PPP2R1A,PTP4A1,RASSF1,RMI2,SETD6,SIAH1,SLC20A1,SPC25,TACC3,TP53I3,TTK,UBA7,UBD,UBE2S,WEE1,ZC3HC1	51
Gene Expression	Expression of RNA	0.0124	Decreased	-2.39	ABT1,ACTR2,ACTR3,ACVR1,ADIRF,AFAP1L2,AHR,ALKBH1,ALYREF,ANXA7,APOE,ARF4,ARNTL2,ATP13A2,ATXN7L3,AURKB,BAD,BAG1,BAP1,BARX2,BCL10,BHLHE41,BIRC2,BLM,BMI1,BRF1,BRF2,BRMS1,BST2,CALCOCO1,CAV1,CBFB,CBX4,CCDC85B,CCN2,CCNB1,CCNC,CCND3,CCNH,CD46,CD47,CD81,CD9,CDK1,CDK4,CDK5R1,CDK9,CDKN1B,CDKN1C,CEBPA,CEBPB,CEBPD,CEBPG,CHCHD2,CHD2,CHD3,CHMP1A,CHUK,CIAO3,CITED4,CNBP,COL1A1,COP1,COPS2,COPS5,CREG1,CREM,CSE1L,CSF…	405
Cell Morphology,Cellular Function and Maintenance	Macroautophagy of cells	0.0149	Decreased	-2.449	ATG5,ATG7,CHMP2B,CHMP4A,CHMP6,CSNK2B,GABARAPL1,GABARAPL2,GNAI3,GPSM1,HDAC10,HGS,MAP1LC3A,MTERF3,MVB12A,PGAM5,RGS19,SCOC,TOMM20,TOMM40,TOMM5,TOMM70,TRIM13,UBXN6,VPS25,VPS28,VPS37B,VPS37D	28
DNA Replication, Recombination, and Repair	Excision repair	3.93e-08	Decreased	-2.595	CCNH,COPS2,COPS3,COPS5,COPS7A,COPS8,E2F1,ERCC1,FEN1,GPS1,GTF2H2,GTF2H4,GTF2H5,HMGA2,NEIL3,NPM1,NTHL1,PCNA,PNKP,POLD1,POLR2A,POLR2C,POLR2E,POLR2F,POLR2H,POLR2I,POLR2K,POLR2L,PPIE,PRMT6,PRPF19,RAD51,RBX1,RFC2,RFC3,RNASEH2A,RPA2,RPA3,TCEA1,TDG,UBA52,UBB,UBC,USP45,XAB2,XPA	46
Gene Expression	Transcription of mRNA	7.98e-05	Decreased	-2.605	CDK9,CTDP1,EREG,HSF1,MDFIC,NELFA,NELFB,PIN1,POLR2A,POLR2C,POLR2E,POLR2F,POLR2H,POLR2I,POLR2K,POLR2L,SUPT4H1	17
Carbohydrate Metabolism	Metabolism of carbohydrate	0.00236	Decreased	-2.621	ABHD3,ADORA2B,AGPAT2,AGPAT5,AGRN,AKR7A2,ALG1,ALG12,ALG2,ALG6,ALG8,AMDHD2,ANXA1,APOE,ARF1,ATG7,B3GALT6,B3GAT3,B3GNT3,B3GNT8,B4GALNT2,B4GALT7,BRAT1,BSG,CALM1 (includes others),CASD1,CBR1,CBR3,CCN2,CDIPT,CHPF,CHPF2,CHPT1,CHST7,CLN6,COQ2,CSNK2B,DCXR,DGKQ,DPM2,DPM3,ETNK1,EXTL2,FOXA2,FPGT,GALK1,GLA,GNPNAT1,GPC1,GRK2,GSTO1,GYG1,HEXB,HLA-A,HPSE,HS2ST1,HS3ST1,HS3ST2,HS3ST3B1,HS3ST6,HS6ST2,HYAL1,IDUA,IGF2,…	129
Cell Cycle,DNA Replication, Recombination, and Repair	DNA recombination	1.35e-06	Decreased	-2.729	ALYREF,ATXN7L3,BLM,COPS7A,ENDOG,ENY2,ERCC1,FBXW5,GPS1,HNRNPC,IGHMBP2,KPNA2,LRRC40,LSM2,LSM4,MSH2,MUS81,PARPBP,PIN1,PRPF19,RAD51,RAD54L,RECQL4,RFC2,RFC3,RMI1,RNF126,RPA2,RPS9,RUVBL2,SERTAD1,SF3B5,SHLD2,SIRT6,SNRPB,SNU13,SRCAP,TIMM13,TONSL,TSN,WEE1,XRCC3,ZMYND8,ZNF219	44
DNA Replication, Recombination, and Repair	Recombination	3.65e-06	Decreased	-2.729	ALYREF,ATXN7L3,BLM,COPS7A,ENDOG,ENY2,ERCC1,FBXW5,GPS1,HNRNPC,IGHMBP2,KPNA2,LRRC40,LSM2,LSM4,MSH2,MUS81,PARPBP,PIN1,PRPF19,RAD51,RAD54L,REC8,RECQL4,RFC2,RFC3,RMI1,RNF126,RPA2,RPS9,RUVBL2,SERTAD1,SF3B5,SHLD2,SIRT6,SNRPB,SNU13,SRCAP,TIMM13,TONSL,TSN,WEE1,XRCC3,ZMYND8,ZNF219	45
Cellular Development,Cellular Growth and Proliferation,Reproductive System Development and Function	Cell proliferation of breast cell lines	0.0131	Decreased	-2.795	ABHD8,AREG,ARF1,ATG5,ATG7,BAP1,CD151,CEBPB,CSE1L,CSNK2B,EPHA2,FGFBP1,FGFR3,GAB2,GPN3,HRAS,IGF2,IGFBP3,MEMO1,MST1R,NFKBIA,NTHL1,PIDD1,PIN1,PTBP1,RAC1,RAP1GDS1,RB1,TAZ,TCIM,TGFBR1,TNF,TRAIP,UBE2B,ZNF404	35
Carbohydrate Metabolism	Synthesis of carbohydrate	0.00608	Decreased	-2.8	ABHD3,ADORA2B,AGPAT2,AGPAT5,AGRN,ALG1,ALG12,ALG2,ALG6,ALG8,AMDHD2,ANXA1,APOE,ARF1,B3GALT6,B3GAT3,B3GNT3,B3GNT8,B4GALT7,BSG,CCN2,CDIPT,CHPF,CHPF2,CHPT1,CHST7,CSNK2B,DGKQ,DPM2,DPM3,ETNK1,FOXA2,GNPNAT1,GPC1,GRK2,GYG1,HLA-A,HS2ST1,HS3ST1,HS3ST2,HS3ST3B1,HS3ST6,HS6ST2,HYAL1,IGF2,IGFBP3,IMPA1,INPP5D,INPP5E,INPP5K,IRS2,LPCAT1,MAP2K1,MIF,MTMR2,MTMR6,NHLRC1,PCYT2,PDGFA,PEMT,PGP,PI4K2B,PIGB,PIGC,PIGP,PITPN…	94
Cancer	Transformation of breast cell lines	0.0058	Decreased	-2.813	ATG7,CDC25A,CEBPB,E2F1,EPHA2,HRAS,MCTS1,NRAS	8
Molecular Transport	Transport of molecule	0.00965	Decreased	-2.831	ABCB10,ABCB8,ABCD1,ALYREF,AMN,ANO8,ANXA1,AP4M1,APOE,APOL1,AQP5,ARF1,ARF6,ARFIP1,ARL4D,ARRDC1,ATOX1,ATP12A,ATP13A2,ATP1B3,ATP5F1B,ATP6AP1,ATP6V0B,ATP6V0D1,ATP6V1C1,ATP6V1D,ATP6V1E1,ATP6V1H,BIN1,BLZF1,BTN3A1,C3,CA13,CAPN10,CAV1,CCDC22,CD320,CHMP1A,CIDEA,CIDEB,CLCN7,CLIC3,CMTM6,CORO7/CORO7-PAM16,CP,CPSF1,CSF1,CXCL8,CYB5R2,CYGB,DDX39A,DDX56,DNAJC1,DPH3,DTX3L,E2F1,EHD1,EIF4A3,EIF5A,F2RL1,FABP3,FADD,FA…	246
Cell Cycle,DNA Replication, Recombination, and Repair	Homologous recombination	3.7e-06	Decreased	-2.873	ATXN7L3,BLM,COPS7A,ENY2,FBXW5,GPS1,HNRNPC,LRRC40,LSM2,LSM4,PARPBP,PRPF19,RAD51,RAD54L,REC8,RECQL4,RFC2,RFC3,RNF126,RPA2,RPS9,RUVBL2,SF3B5,SHLD2,SIRT6,SNRPB,SNU13,SRCAP,TIMM13,TONSL,WEE1,XRCC3,ZMYND8,ZNF219	34
Lipid Metabolism,Small Molecule Biochemistry	Synthesis of lipid	0.000198	Decreased	-3.258	ABHD3,ACAT2,ACER2,ACER3,ACOT7,ACOT8,AGPAT2,AGPAT5,ALDH3B2,ALG1,ALG12,ALG2,ALG6,ALG8,AMACR,ANPEP,ANXA1,APOE,ARF1,ARV1,C3,CAV1,CD9,CDIPT,CERS3,CES1,CHPT1,CNBP,CNEP1R1,COTL1,CREM,CRLS1,CSNK1G2,CSNK2B,CXCL8,CYP27B1,CYP2R1,DECR2,DEGS1,DEGS2,DGAT1,DGKQ,DHRS11,DHRS9,DPM2,DPM3,EDNRA,ELOVL1,ESRRA,ETNK1,F2RL1,FAR1,FAR2,FAS,FASN,FDXR,FGF1,FN1,GPC1,HACD2,HINT2,HPGD,HSD11B1,HSD17B7,HSD17B8,HSD3B7,HTD2,IGF2,IL…	154
Cell Cycle,DNA Replication, Recombination, and Repair	Homologous recombination of cells	3.96e-05	Decreased	-3.46	COPS7A,FBXW5,GPS1,HNRNPC,LRRC40,LSM2,LSM4,PARPBP,PRPF19,RAD51,RECQL4,RFC2,RFC3,RNF126,RPA2,RPS9,RUVBL2,SF3B5,SHLD2,SNRPB,SNU13,TIMM13,TONSL,ZMYND8,ZNF219	25
DNA Replication, Recombination, and Repair	Repair of DNA	3.5e-13	Decreased	-3.57	ACTR5,ALKBH1,ASF1A,ATP23,BAP1,BLM,BMI1,CCNH,CDCA5,CDK1,CDK9,CEBPA,CENPS/CENPS-CORT,CIB1,COPS2,COPS3,COPS5,COPS7A,COPS8,CYREN,DTX3L,E2F1,ERCC1,FANCA,FANCF,FANCG,FANCL,FASN,FBXO6,FEN1,FUS,GPS1,GTF2H2,GTF2H4,GTF2H5,H2AX,H4C11,H4C14,H4C15,HAT1,HDAC10,HMGA2,HRAS,HUS1,IGHMBP2,IPMK,KPNA2,MAD2L2,MGMT,MPG,MSH2,MTA1,MUS81,NAE1,NBN,NEIL3,NOP53,NPM1,NTHL1,OTUB1,PARK7,PARP9,PAXX,PCNA,PGAM1,PNKP,POLD1,POLE2,PO…	120
Cell Cycle,DNA Replication, Recombination, and Repair	Recombination of cells	2.2e-05	Decreased	-3.602	COPS7A,ERCC1,FBXW5,GPS1,HNRNPC,LRRC40,LSM2,LSM4,MUS81,PARPBP,PRPF19,RAD51,RECQL4,RFC2,RFC3,RNF126,RPA2,RPS9,RUVBL2,SF3B5,SHLD2,SNRPB,SNU13,TIMM13,TONSL,ZMYND8,ZNF219	27
Cell Death and Survival	Cell viability of breast cancer cell lines	0.00404	Decreased	-4.449	ARTN,ATG5,ATG7,BAG1,CARD10,CASP3,CCN2,CD151,CEBPD,CHCHD6,DAPK3,ECM1,ELOVL1,ERCC1,ESRRA,FASN,FN1,HMGA2,HRAS,IGFBP3,IRS2,ITGB3,JAG2,KIF11,KIFC1,KIFC3,KRT19,LGALS3,MAD2L1,MAP2K3,MUC4,NDUFAF4,NME3,NRAS,NT5C3A,PBK,PGRMC1,PRDX2,PRMT1,PRPS2,PTGS2,PYCARD,RAD51,RB1,RNF126,SDC1,SELENOH,SFN,SGPP1,SHLD2,SMAD3,SNRPE,SNX16,SOD2,SPHK1,TGM2,TNF,TNFSF10,TSSK6,TWIST1,UGCG,XPA	62
Cellular Development,Cellular Growth and Proliferation	Cell proliferation of breast cancer cell lines	0.000108	Decreased	-4.581	ACTB,AHR,ANXA1,ARF1,ARRDC3,ARTN,ATAD3A,ATG7,BAD,BAG1,BARX2,BCAR1,BIN1,BMI1,CARD10,CASP3,CAV1,CCN2,CCNE1,CD151,CDK1,CDKN1B,CEBPA,CEBPB,CEBPD,CHCHD6,CIP2A,CISD2,CKS2,COPS2,COPS3,COPS5,CSE1L,CSF1,CST6,CXCL8,DEGS1,DEGS2,DTL,DTYMK,DUSP5,E2F1,EPHA2,ESRRA,F3,FAS,FASN,FGF1,FGFBP1,FN1,FOLR1,GAB2,GALNT6,GLS,GMNN,GNAS,GPC1,H1-2,H2AX,H2AZ1,HAT1,HES1,HPGD,HRAS,HSF1,IGF2,IGFBP3,IGFBP7,IKBKG,IL6,INHBA,IRS2,ITGB…	152
Cell Death and Survival	Cell viability of cervical cancer cell lines	0.000572	Decreased	-5.213	ACER2,ADK,ASF1A,ATP5MD,AURKAIP1,AURKB,BAG1,BCL2A1,BLM,CAV1,CCNA2,CENPA,CTBP1,DUSP12,DUSP14,DUSP22,DUSP5,FAAP20,FANCA,FAS,FTH1,INPP5K,LAMTOR3,MCOLN1,MCOLN2,MINPP1,MPG,MTMR6,NBN,NEK7,NFKBIA,NKRF,PFDN1,PFDN2,PMAIP1,PNKP,PPP1CC,PPP1R8,PPP2CA,PPP2R1A,PPP2R5A,PPP6C,PRKACB,PRPF19,PTPRZ1,RAC1,RAD18,RAD51,RFK,RNASEH2A,S100P,SBF1,SELENOH,SGPP1,SKA1,SKA3,SOD2,SPHK1,SUGT1,TDG,TNF,TNK2,TONSL,TP53I3,TTK,VBP1,X…	67
Cellular Development,Cellular Growth and Proliferation	Cell proliferation of tumor cell lines	3e-06	Decreased	-5.957	AASDHPPT,ABCB10,ABTB1,ACER3,ACTB,ACVR1,ADORA2B,ADSL,AFF1,AHR,AJUBA,AKAP12,AKIRIN2,AKR1B10,ALDH1A1,AMACR,ANXA1,ANXA7,AQP5,AREG,ARF1,ARL2BP,ARL4C,ARL5A,ARRDC3,ARTN,ATAD3A,ATG5,ATG7,ATP5MD,ATP6AP1,AURKB,BAD,BAG1,BAP1,BARX2,BCAR1,BIN1,BIRC2,BMI1,BOP1,BRINP1,BRK1,BSG,BUB3,C1GALT1,CACYBP,CARD10,CASP3,CAV1,CCL20,CCN2,CCNA2,CCNB1,CCNB2,CCND3,CCNE1,CD151,CD24,CD320,CD81,CDCA2,CDCA4,CDCA5,CDCA8,CDK1,CDK2AP…	504
Infectious Diseases,Organismal Injury and Abnormalities	Infection of embryonic cell lines	0.00324	Decreased	-6.432	AMDHD2,ANAPC2,B4GALNT4,BSG,CAD,CALCOCO1,CD164,CTBP1,CTDP1,DUSP12,ERCC1,ERI3,FPGS,GRK2,GTF2H2,IFITM1,IL36G,MED6,MED7,MRPS12,MT1X,MT2A,MUS81,NCKAP1,NDFIP1,NDUFAF3,NECAB3,NTN1,NUDT11,PARP9,PDCD2L,PFKL,POLR1E,POLR2A,POLR2C,POLR2I,PPP1R12C,PSMA1,PSMA3,PSMA5,PSMA7,PSMC3,PSMC4,PSMD12,PSMD6,PTGES3,PYCR3,RBM25,RHOB,RHOC,RMI1,RNH1,RNPS1,RPL10A,RPL18,RPL3,SCAF1,SDF4,SLC35A2,SNRPD3,SPEN,SPHK1,SRSF6,SUB1,TLE5…	72
Infectious Diseases	Infection of epithelial cell lines	0.0035	Decreased	-6.432	AMDHD2,ANAPC2,B4GALNT4,BSG,CAD,CALCOCO1,CD164,CTBP1,CTDP1,DUSP12,ERCC1,ERI3,FPGS,GRK2,GTF2H2,IFITM1,IL36G,MED6,MED7,MRPS12,MT1X,MT2A,MUS81,NCKAP1,NDFIP1,NDUFAF3,NECAB3,NTN1,NUDT11,PARP9,PDCD2L,PFKL,POLR1E,POLR2A,POLR2C,POLR2I,PPP1R12C,PSMA1,PSMA3,PSMA5,PSMA7,PSMC3,PSMC4,PSMD12,PSMD6,PTGES3,PYCR3,RBM25,RHOB,RHOC,RMI1,RNH1,RNPS1,RPL10A,RPL18,RPL3,SCAF1,SDF4,SLC35A2,SNRPD3,SPEN,SPHK1,SRSF6,SUB1,TLE5…	72
Infectious Diseases	Infection of kidney cell lines	0.0055	Decreased	-6.435	AMDHD2,ANAPC2,B4GALNT4,BSG,CAD,CALCOCO1,CD164,CTBP1,CTDP1,DUSP12,ERCC1,ERI3,FPGS,GRK2,GTF2H2,IFITM1,IL36G,MED6,MED7,MRPS12,MT1X,MT2A,MUS81,NCKAP1,NDFIP1,NDUFAF3,NECAB3,NTN1,NUDT11,PARP9,PDCD2L,PFKL,POLR1E,POLR2A,POLR2C,POLR2I,PPP1R12C,PSMA1,PSMA3,PSMA5,PSMA7,PSMC3,PSMC4,PSMD12,PSMD6,PTGES3,PYCR3,RBM25,RHOB,RHOC,RMI1,RNH1,RNPS1,RPL10A,RPL18,RPL3,SCAF1,SDF4,SLC35A2,SNRPD3,SPEN,SPHK1,SRSF6,SUB1,TLE5…	72
Infectious Diseases	Replication of Influenza virus	0.00455	Decreased	-6.62	ANPEP,AREG,ARHGAP21,ARTN,ATP6AP1,ATP6AP2,ATP6V0B,ATP6V0D1,CAD,CD58,CD81,CDK4,CDKN1B,CEL,CLUH,COPB1,COPS5,CSE1L,EIF4A3,F2RL1,FANCG,FAU,FSCN1,GAK,GBP1,HPGD,HRAS,HSPD1,IFITM1,IL32,ISG15,KATNB1,KIF11,MAP2K3,MAP3K7CL,MAP4K4,MARCHF2,MED6,MX1,NAA10,NTHL1,NUP54,OAS3,PBK,PIN1,PKD1,PLK4,POLR2A,POLR2H,POLR2L,PRPS1,PRSS27,PSMA1,PSMD14,PTPMT1,RBM42,RPS14,RPS16,RPS5,RUVBL2,SAE1,TBL3,TCF3,TNFSF10,TNK2,TRMT61A,T…	71
Infectious Diseases	Replication of Influenza A virus	0.00588	Decreased	-6.766	ANPEP,AREG,ARHGAP21,ARTN,ATP6AP1,ATP6AP2,ATP6V0B,ATP6V0D1,CAD,CD58,CD81,CDK4,CDKN1B,CEL,CLUH,COPB1,COPS5,CSE1L,EIF4A3,F2RL1,FANCG,FAU,FSCN1,GAK,GBP1,HPGD,HRAS,HSPD1,IFITM1,IL32,ISG15,KATNB1,KIF11,MAP2K3,MAP3K7CL,MAP4K4,MARCHF2,MED6,MX1,NAA10,NTHL1,NUP54,OAS3,PBK,PIN1,PKD1,PLK4,POLR2A,POLR2H,POLR2L,PRPS1,PRSS27,PSMA1,PSMD14,PTPMT1,RBM42,RPS14,RPS16,RPS5,RUVBL2,SAE1,TBL3,TCF3,TNK2,TRMT61A,TSSK6,TUB…	70
Cell Death and Survival	Cell viability	0.00104	Decreased	-6.767	ACER2,ADH5,ADK,AHR,ANAPC4,APOE,AREG,ARTN,ASF1A,ATG5,ATG7,ATP13A2,ATP5MD,ATP5PD,AURKAIP1,AURKB,BAD,BAG1,BCL2A1,BIRC2,BLM,BMI1,C1GALT1,C3,CALB2,CARD10,CASP3,CAV1,CBR1,CCN2,CCNA2,CCNB1,CCND3,CCNG1,CD151,CD24,CD81,CDCA8,CDK1,CDK2AP1,CDKN1B,CDKN1C,CEBPB,CEBPD,CENPA,CES1,CHCHD6,CLCN7,CLDN4,COL1A1,COMMD3-BMI1,COPS3,CSE1L,CSF1,CTBP1,CXCL8,CYBA,CYP2C18,DAPK3,DCUN1D5,DUSP12,DUSP14,DUSP22,DUSP5,E2F1,ECM1,EG…	304
Cell Death and Survival	Cell survival	0.000718	Decreased	-6.907	ACER2,ADH5,ADK,AFAP1L2,AHR,ANAPC4,APOE,AREG,ARTN,ASF1A,ATG5,ATG7,ATP13A2,ATP5MD,ATP5PD,AURKAIP1,AURKB,BAD,BAG1,BCL2A1,BIRC2,BLM,BMI1,C1GALT1,C3,CALB2,CARD10,CASP3,CAV1,CBR1,CCN2,CCNA2,CCNB1,CCND3,CCNG1,CD151,CD24,CD81,CDCA8,CDK1,CDK2AP1,CDKN1B,CDKN1C,CEBPB,CEBPD,CENPA,CES1,CHCHD6,CLCN7,CLDN4,COL18A1,COL1A1,COMMD3-BMI1,COPS3,CSE1L,CSF1,CTBP1,CXCL8,CYBA,CYP2C18,DAPK3,DCUN1D5,DUSP12,DUSP14,DUSP22,DU…	315
Infectious Diseases	Replication of virus	0.0148	Decreased	-7.169	ANPEP,AP1M1,APOBEC3F,AREG,ARHGAP21,ARL16,ARTN,ATG7,ATP1B3,ATP6AP1,ATP6AP2,ATP6V0B,ATP6V0D1,BIRC3,BST2,CAD,CD58,CD81,CDK4,CDKN1B,CEL,CES1,CLUH,COPB1,COPS5,CSE1L,CST3,CTBP1,CXCL8,DKK1,EIF4A3,EXOSC5,F2RL1,FANCG,FAU,FKBP1A,FSCN1,GAK,GAS6,GBP1,GRK2,HPGD,HRAS,HSF1,HSPD1,IFIT1,IFITM1,IL18,IL32,IL6,IRF9,ISG15,KATNB1,KIF11,MAFK,MAP1LC3A,MAP2K3,MAP3K7CL,MAP4K4,MARCHF2,MED26,MED6,MED7,MSH2,MX1,NAA10,NTHL1,N…	117
Cell Death and Survival	Cell viability of tumor cell lines	0.000528	Decreased	-7.278	ACER2,ADH5,ADK,AHR,ANAPC4,APOE,AREG,ARTN,ASF1A,ATG5,ATG7,ATP13A2,ATP5MD,ATP5PD,AURKAIP1,AURKB,BAD,BAG1,BCL2A1,BIRC2,BLM,BMI1,C1GALT1,CARD10,CASP3,CAV1,CBR1,CCN2,CCNA2,CCNB1,CCND3,CCNG1,CD151,CD24,CD81,CDCA8,CDKN1B,CDKN1C,CEBPB,CEBPD,CENPA,CES1,CHCHD6,CLCN7,CLDN4,COL1A1,COMMD3-BMI1,COPS3,CSE1L,CTBP1,CXCL8,CYBA,CYP2C18,DAPK3,DCUN1D5,DUSP12,DUSP14,DUSP22,DUSP5,E2F1,ECM1,EGLN1,EIF4A3,ELOVL1,ENG,EPHA2…	264
Infectious Diseases	Productive infection of cervical cancer cell lines	0.000969	Decreased	-7.482	ABTB1,ANAPC2,ARPC1A,ATOX1,ATP5F1B,CCT2,CYCS,DVL1,EDNRA,FNTA,GABARAPL2,GRK2,HES1,HGS,KLF2,KLK12,LRRC8D,LSM14B,MED17,MED26,MED6,MED7,MED8,MRPL23,NBEAL2,NDUFB7,NDUFS7,NEIL3,PCGF1,PDSS1,PIGH,POLR2H,POLR2K,POLR2L,RALB,SDC1,SEC61G,SHCBP1,SLC38A6,SLC9A6,SPCS3,SRSF2,SSR1,SSR3,SSU72,TATDN1,TGDS,THAP11,TIMM8A,TOR2A,TRPT1,TUBAL3,TWF1,UAP1,UBE2E1,UPF3B,UQCRC1,VPS4A,ZMPSTE24,ZNF512B	60
Infectious Diseases	Infection by Retroviridae	0.00215	Decreased	-9.945	ABTB1,ACTR3,ADK,AMDHD2,ANAPC2,ANKRD9,ARF1,ARF6,ARPC1A,ATG7,ATOX1,ATP5F1B,B4GALNT4,C1orf174,C1R,C1S,C3,CAD,CALCOCO1,CAV2,CCT2,CD164,CSF1,CTDP1,CXCL8,CYCS,CYSRT1,DIMT1,DNAL1,DUSP12,DVL1,EDNRA,ERCC1,ERI3,ETHE1,EXOSC3,EXOSC5,FAS,FHL3,FKBP1A,FN1,FNTA,FPGS,GABARAPL2,GABRP,GAS6,GEMIN2,GRIN3B,GRK2,GTF2H2,H3-3A/H3-3B,HDAC10,HES1,HGS,HIP1R,HLA-A,IGHMBP2,IKBKG,IL18,IL36G,IL6,INTS7,KAT2A,KLF2,KLK12,LRRC8D,LS…	195
Infectious Diseases	Infection of tumor cell lines	0.000161	Decreased	-10.08	ABTB1,ACTR2,ANAPC2,ANKRD9,APOBEC3F,APOE,ARF1,ARF6,ARPC1A,ARPC1B,ARPC3,ARPC5,ATG7,ATOX1,ATP5F1B,ATP6AP2,ATP6V0B,ATP6V0D1,CAV2,CBLC,CCT2,CD46,CHCHD2,CLTB,COPB1,CROCC,CTBP1,CTDP1,CXCL8,CYB5B,CYCS,CYSRT1,DCAF13,DIMT1,DNAL1,DVL1,EDNRA,EEA1,EPHA2,EPN1,ETHE1,EXOSC3,EXOSC5,FAS,FAU,FBL,FHL3,FNTA,FOLR1,GABARAPL2,GAS6,GCSH,GEMIN2,GRK2,H3-3A/H3-3B,HES1,HGS,HIP1R,IFITM1,IGHMBP2,IKBKG,INTS7,KAT2A,KLF2,KLK12,LC…	142
Infectious Diseases	HIV infection	0.00194	Decreased	-10.108	ABTB1,ACTR3,ADK,AMDHD2,ANAPC2,ANKRD9,ARF1,ARF6,ARPC1A,ATG7,ATOX1,ATP5F1B,B4GALNT4,C1orf174,C1R,C1S,C3,CAD,CALCOCO1,CAV2,CCT2,CD164,CSF1,CTDP1,CXCL8,CYCS,CYSRT1,DIMT1,DNAL1,DUSP12,DVL1,EDNRA,ERCC1,ERI3,ETHE1,EXOSC3,EXOSC5,FAS,FHL3,FKBP1A,FN1,FNTA,FPGS,GABARAPL2,GABRP,GEMIN2,GRIN3B,GRK2,GTF2H2,H3-3A/H3-3B,HDAC10,HES1,HGS,HIP1R,HLA-A,IGHMBP2,IKBKG,IL18,IL36G,IL6,INTS7,KAT2A,KLF2,KLK12,LRRC8D,LSM14B,…	194
Infectious Diseases	Infection of cervical cancer cell lines	0.000585	Decreased	-10.24	ABTB1,ANAPC2,ANKRD9,APOBEC3F,ARF1,ARPC1A,ATG7,ATOX1,ATP5F1B,ATP6AP2,ATP6V0B,ATP6V0D1,CAV2,CCT2,COPB1,CTBP1,CTDP1,CXCL8,CYCS,CYSRT1,DCAF13,DIMT1,DNAL1,DVL1,EDNRA,ETHE1,EXOSC3,EXOSC5,FAU,FBL,FHL3,FNTA,GABARAPL2,GEMIN2,GRK2,H3-3A/H3-3B,HES1,HGS,HIP1R,IGHMBP2,IKBKG,INTS7,KAT2A,KLF2,KLK12,LCN2,LOC102724159/PWP2,LRRC8D,LSM14B,LY6D,MAP3K11,MED17,MED26,MED6,MED7,MED8,MKRN2,MMADHC,MND1,MRPL23,NBEAL2,NDUFB…	118
Infectious Diseases	Infection by HIV-1	5.11e-05	Decreased	-10.511	ABTB1,ACTR3,AMDHD2,ANAPC2,ANKRD9,ARF1,ARF6,ARPC1A,ATG7,ATOX1,ATP5F1B,B4GALNT4,CAD,CALCOCO1,CAV2,CCT2,CD164,CSF1,CTDP1,CXCL8,CYCS,CYSRT1,DIMT1,DNAL1,DUSP12,DVL1,EDNRA,ERCC1,ERI3,ETHE1,EXOSC3,EXOSC5,FAS,FHL3,FNTA,FPGS,GABARAPL2,GABRP,GEMIN2,GRK2,GTF2H2,H3-3A/H3-3B,HDAC10,HES1,HGS,HIP1R,IGHMBP2,IKBKG,IL18,IL36G,INTS7,KAT2A,KLF2,KLK12,LRRC8D,LSM14B,LY6D,MAP3K11,MED17,MED26,MED6,MED7,MED8,MKRN2,MMADHC…	176
Infectious Diseases	Infection of cells	2.59e-06	Decreased	-10.695	ABTB1,ACTR2,ACTR3,AMDHD2,ANAPC2,ANKRD9,APOBEC3F,APOE,AREG,ARF1,ARF6,ARPC1A,ARPC1B,ARPC3,ARPC5,ATG7,ATOX1,ATP5F1B,ATP6AP2,ATP6V0B,ATP6V0D1,B4GALNT4,BSG,C1R,C1S,C3,CAD,CALCOCO1,CAV1,CAV2,CBLC,CCT2,CD164,CD46,CD58,CHCHD2,CLTB,COPB1,CROCC,CSF1,CTBP1,CTDP1,CXCL8,CYB5B,CYCS,CYSRT1,DCAF13,DIMT1,DNAL1,DUSP12,DVL1,EDNRA,EEA1,EPHA2,EPN1,ERCC1,ERI3,ETHE1,EXOSC3,EXOSC5,FAS,FAU,FBL,FHL3,FN1,FNTA,FOLR1,FPGS,GA…	221
Infectious Diseases	Infection by RNA virus	0.000769	Decreased	-10.731	ABTB1,ACTR2,ACTR3,ADK,AMDHD2,ANAPC2,ANKRD9,APOE,AREG,ARF1,ARF6,ARPC1A,ARPC1B,ARPC3,ARPC5,ATG7,ATOX1,ATP5F1B,ATP6AP2,ATP6V0B,ATP6V0D1,B4GALNT4,BSG,C1orf174,C1R,C1S,C3,CAD,CALCOCO1,CAMLG,CAV2,CBLC,CCT2,CD164,CHCHD2,CLTB,COPB1,CROCC,CSF1,CTBP1,CTDP1,CXCL8,CYB5B,CYCS,CYSRT1,DCAF13,DIMT1,DNAL1,DUSP12,DVL1,EDNRA,EEA1,EPHA2,EPN1,ERCC1,ERI3,ETHE1,EXOSC3,EXOSC5,FAS,FAU,FBL,FHL3,FKBP1A,FN1,FNTA,FOLR1,FPGS,…	239
Infectious Diseases	Viral Infection	1.41e-06	Decreased	-12.552	ABCE1,ABTB1,ACTR2,ACTR3,ADK,ADORA2B,AMDHD2,ANAPC2,ANKRD9,ANPEP,ANXA1,AP1M1,APOBEC3F,APOE,APOL1,AREG,ARF1,ARF6,ARHGAP21,ARL16,ARL4C,ARPC1A,ARPC1B,ARPC3,ARPC5,ARRDC1,ARRDC3,ARTN,ASF1A,ATAD3B,ATG5,ATG7,ATOX1,ATP1B3,ATP5F1B,ATP6AP1,ATP6AP2,ATP6V0B,ATP6V0D1,B4GALNT4,BIRC3,BSG,BST2,C1orf174,C1R,C1S,C3,CAD,CALCOCO1,CAMLG,CAV1,CAV2,CBLC,CCT2,CD164,CD24,CD46,CD58,CD81,CD9,CDK4,CDKN1B,CEBPD,CEL,CES1,CHCHD2…	419
