# Supplementary material for: Protein Coding and Long Noncoding RNA (lncRNA) Transcriptional Landscape in SARS-CoV-2 Infected Bronchial Epithelial Cells Highlight a Role for Interferon and Inflammatory Response
Source: Genes (Basel). 2020 Jul 7;11(7):760. doi: 10.3390/genes11070760 (PMC7397219; doi:10.3390/genes11070760)
Supplement: Supplementary file 1 [file genes-11-00760-s001.zip › Supplementary table 7.xlsx]

## Sheet: GE.NHBE-SARS-COV-2_vs_NHBE-mock
Supplementary table 6. Differentially expresed lncRNA genes in NHBE SARS-CoV-2 infected cells
GeneID (Regulation criterion: fold > 2.0 and rawp p-value < 0.05)	Gene type	Gene name	NHBE-SARS-COV-2_vs_NHBE-mock-log_fold	NHBE-SARS-COV-2_vs_NHBE-mock-p_value
ENSG00000269926	lncRNA	DDIT4-AS1	7.73093	6.37657e-05
ENSG00000272114	lncRNA	AL136131.3	7.11639	7.54504e-10
ENSG00000235288	lncRNA	AC099329.1	5.33471	0.00216105
ENSG00000258017	lncRNA	AC011603.3	5.21668	0.00781474
ENSG00000267469	lncRNA	AC005944.1	5.10022	7.24494e-07
ENSG00000284829	lncRNA	AL662884.2	5.09464	1.32785e-05
ENSG00000283375	lncRNA	AC087521.4	4.95588	3.80236e-05
ENSG00000276980	lncRNA	AC008760.2	4.91691	2.01397e-07
ENSG00000272540	lncRNA	AL662797.2	4.88843	2.21031e-06
ENSG00000257379	lncRNA	AC023509.1	4.66462	1.41241e-05
ENSG00000257622	lncRNA	AL512356.1	4.61329	2.6248e-07
ENSG00000258377	lncRNA	AL139099.2	4.41593	6.72545e-06
ENSG00000262413	lncRNA	AC145207.2	4.41529	0.00241665
ENSG00000241326	lncRNA	AL603962.1	4.27302	1.38348e-05
ENSG00000260934	lncRNA	AC130456.5	4.26475	0.000221197
ENSG00000227751	lncRNA	RCC2-AS1	4.20843	0.00048996
ENSG00000266402	lncRNA	SNHG25	3.2977	0.00105199
ENSG00000235298	lncRNA	AL354733.3	3.21675	0.000158292
ENSG00000253445	lncRNA	AC027309.1	3.16916	0.000628112
ENSG00000229851	lncRNA	ARSD-AS1	3.09755	2.48092e-06
ENSG00000257000	lncRNA	AC137590.1	2.86303	8.35619e-07
ENSG00000285988	lncRNA	AL392086.2	2.78206	3.26184e-05
ENSG00000273637	lncRNA	AL139260.2	2.73929	3.35711e-05
ENSG00000263301	lncRNA	AC113189.3	2.6871	0.000331646
ENSG00000231574	lncRNA	LINC02015	2.68519	3.13308e-06
ENSG00000288012	lncRNA	AP003307.2	2.62309	0.00351329
ENSG00000268366	lncRNA	AC010271.1	2.50654	2.35181e-07
ENSG00000245904	lncRNA	AC025164.2	2.45063	7.39873e-05
ENSG00000267827	lncRNA	AC011468.2	2.35507	0.00237526
ENSG00000274021	lncRNA	AC024909.1	2.3426	0.0012351
ENSG00000251562	lncRNA	MALAT1	2.33769	0.00010486
ENSG00000262456	lncRNA	AC006435.1	2.33206	0.00495185
ENSG00000268199	lncRNA	AC010335.1	2.29432	3.58809e-06
ENSG00000260279	lncRNA	AC137932.1	2.20212	1.98077e-05
ENSG00000272482	lncRNA	AC254633.1	2.12323	1.51143e-06
ENSG00000269110	lncRNA	AC010636.2	2.11168	0.0136251
ENSG00000264982	lncRNA	AC015563.3	2.0343	0.000711294
ENSG00000267523	lncRNA	AC008735.2	2.01813	0.0201414
ENSG00000273272	lncRNA	U62317.4	1.99625	0.00247374
ENSG00000269888	lncRNA	AC112491.1	1.98192	0.010668
ENSG00000258976	lncRNA	AC013451.2	1.96516	0.00298597
ENSG00000260911	lncRNA	AC135050.3	1.93329	0.00107071
ENSG00000257647	lncRNA	AC124312.2	1.85144	0.000386718
ENSG00000255857	lncRNA	PXN-AS1	1.84302	7.45345e-05
ENSG00000268108	lncRNA	AC008687.2	1.82709	0.00192357
ENSG00000262880	lncRNA	AC113189.2	1.82	0.0162956
ENSG00000258504	lncRNA	AL157871.1	1.80779	0.00446794
ENSG00000255337	lncRNA	AP001830.1	1.80709	0.000912184
ENSG00000254461	lncRNA	AP001107.4	1.79735	0.001831
ENSG00000238287	lncRNA	AL603839.3	1.79182	0.0012298
ENSG00000241728	lncRNA	AP001062.3	1.7901	0.000263384
ENSG00000275216	lncRNA	AL161431.1	1.77306	5.49787e-05
ENSG00000268812	lncRNA	AC004264.1	1.77172	0.000906901
ENSG00000268621	lncRNA	IGFL2-AS1	1.7462	0.00486188
ENSG00000256969	lncRNA	AC084375.1	1.64611	0.00026243
ENSG00000270871	lncRNA	AC015849.3	1.64477	6.01176e-05
ENSG00000242288	lncRNA	AC022400.3	1.63675	0.00771877
ENSG00000230526	lncRNA	AC073370.1	1.63387	0.00418271
ENSG00000261288	lncRNA	AC093525.5	1.63137	7.16645e-05
ENSG00000275055	lncRNA	AC011468.5	1.62667	0.00210741
ENSG00000203392	lncRNA	AC105020.1	1.5404	1.33065e-06
ENSG00000258955	lncRNA	LINC00519	1.53947	5.44409e-05
ENSG00000280279	lncRNA	AC240565.4	1.5229	0.00207173
ENSG00000204362	lncRNA	LINC02783	1.50194	0.000831679
ENSG00000286431	lncRNA	BX842570.1	1.49856	0.000363258
ENSG00000272582	lncRNA	AL031587.3	1.48899	0.000585821
ENSG00000268287	lncRNA	AC008687.3	1.48162	0.00103303
ENSG00000230606	lncRNA	AC092683.1	1.48036	8.25725e-05
ENSG00000267105	lncRNA	AC011511.3	1.47817	0.000852061
ENSG00000278456	lncRNA	AC015712.7	1.47569	0.00203381
ENSG00000214772	lncRNA	AC010168.1	1.47104	0.000368635
ENSG00000259342	lncRNA	AC025580.1	1.4663	2.38562e-05
ENSG00000234840	lncRNA	LINC01239	1.46034	4.16861e-05
ENSG00000233695	lncRNA	GAS6-AS1	1.44851	1.4057e-06
ENSG00000253522	lncRNA	MIR3142HG	1.42702	0.00102958
ENSG00000261488	lncRNA	TBILA	1.41955	9.93702e-05
ENSG00000264304	lncRNA	AC024267.4	1.41762	0.000204845
ENSG00000230325	lncRNA	AL359921.1	1.41175	0.0148633
ENSG00000286811	lncRNA	AL353138.1	1.40981	0.00198402
ENSG00000267696	lncRNA	ERVK-28	1.39884	1.18686e-05
ENSG00000257084	lncRNA	MIR200CHG	1.39838	0.00214658
ENSG00000273350	lncRNA	AC004832.5	1.39716	0.0373353
ENSG00000283064	lncRNA	AL353759.1	1.39045	0.000101316
ENSG00000261971	lncRNA	MMP25-AS1	1.38996	6.7327e-05
ENSG00000224409	lncRNA	AC114489.2	1.3868	5.81094e-06
ENSG00000268201	lncRNA	AC020915.2	1.38027	0.00216311
ENSG00000238045	lncRNA	AC009133.1	1.36818	0.00349673
ENSG00000278600	lncRNA	AC015871.3	1.3664	0.00764329
ENSG00000280634	lncRNA	THRIL	1.36325	0.011111
ENSG00000273113	lncRNA	AC133528.1	1.35253	0.0374106
ENSG00000232931	lncRNA	LINC00342	1.35095	0.00061425
ENSG00000270696	lncRNA	AC005034.4	1.35033	0.000202727
ENSG00000249786	lncRNA	EAF1-AS1	1.34193	1.39421e-05
ENSG00000269834	lncRNA	ZNF528-AS1	1.33885	3.31141e-05
ENSG00000205488	lncRNA	CALML3-AS1	1.33508	9.94162e-05
ENSG00000231187	lncRNA	AL356056.2	1.33395	7.69219e-06
ENSG00000278611	lncRNA	ZNF426-DT	1.33145	0.000204867
ENSG00000231628	lncRNA	AL133406.2	1.33145	0.000719076
ENSG00000245112	lncRNA	SMARCA5-AS1	1.33077	0.00647758
ENSG00000284968	lncRNA	AC093827.4	1.32732	0.000154692
ENSG00000253417	lncRNA	LINC02159	1.32706	0.00233099
ENSG00000286555	lncRNA	AP003065.3	1.31913	0.00126872
ENSG00000263826	lncRNA	AC112907.3	1.31184	0.00380555
ENSG00000270179	lncRNA	AP002840.2	1.30893	0.0132869
ENSG00000277991	lncRNA	FP236241.2	1.29156	0.0145012
ENSG00000278621	lncRNA	AC037198.2	1.29097	0.0382142
ENSG00000272758	lncRNA	AC083798.2	1.2882	0.0161144
ENSG00000259178	lncRNA	AC023906.2	1.27747	0.0232055
ENSG00000274292	lncRNA	AC084018.2	1.2734	0.0190794
ENSG00000250379	lncRNA	AC020659.2	1.27025	0.0283093
ENSG00000285863	lncRNA	AC009554.2	1.26804	0.000662781
ENSG00000277701	lncRNA	AC159540.2	1.24103	2.51688e-05
ENSG00000266521	lncRNA	AC021549.2	1.21894	0.0144117
ENSG00000214049	lncRNA	UCA1	1.21693	0.000736521
ENSG00000257042	lncRNA	AC008011.2	1.21355	0.0115979
ENSG00000239407	lncRNA	Z68871.1	1.21008	0.00915837
ENSG00000263823	lncRNA	AC009831.1	1.19356	0.00326181
ENSG00000272186	lncRNA	AP003392.5	1.18947	8.93577e-05
ENSG00000278177	lncRNA	AL354811.1	1.18937	0.0100305
ENSG00000287086	lncRNA	AC034193.1	1.17269	0.0113174
ENSG00000261069	lncRNA	AC124312.3	1.16888	0.00715514
ENSG00000248429	lncRNA	FAM198B-AS1	1.16274	0.000266438
ENSG00000274315	lncRNA	AC009318.3	1.1602	0.000993458
ENSG00000257671	lncRNA	KRT7-AS	1.15953	0.0291294
ENSG00000268531	lncRNA	AC060814.2	1.15864	0.00998176
ENSG00000269481	lncRNA	AC010319.4	1.15661	0.0012277
ENSG00000256615	lncRNA	AC010197.1	1.14012	0.000695682
ENSG00000204528	lncRNA	PSORS1C3	1.13976	0.0103143
ENSG00000224525	lncRNA	AL591686.1	1.1347	6.80296e-05
ENSG00000245532	lncRNA	NEAT1	1.11817	0.00877255
ENSG00000238120	lncRNA	LINC01589	1.11625	0.021377
ENSG00000267811	lncRNA	AP001160.2	1.11293	0.0173299
ENSG00000274026	lncRNA	FAM27E3	1.11035	0.00156375
ENSG00000244459	lncRNA	AC147067.1	1.10582	0.00714799
ENSG00000281903	lncRNA	LINC02246	1.1017	0.000832504
ENSG00000157306	lncRNA	ZFHX2-AS1	1.09747	0.0042387
ENSG00000272941	lncRNA	AC083862.2	1.08828	0.00388876
ENSG00000260884	lncRNA	AC009120.3	1.08783	0.00125844
ENSG00000215039	lncRNA	CD27-AS1	1.07579	0.000173886
ENSG00000251259	lncRNA	AC004069.1	1.06976	0.0335744
ENSG00000186019	lncRNA	AC021092.1	1.04842	0.0228485
ENSG00000253716	lncRNA	MINCR	1.04679	0.00283265
ENSG00000255498	lncRNA	AC068385.1	1.0379	0.0346043
ENSG00000253258	lncRNA	AC068228.2	1.03555	0.000739789
ENSG00000263272	lncRNA	AC004148.1	1.03463	0.00590445
ENSG00000185186	lncRNA	LINC00313	1.02724	0.000872503
ENSG00000260121	lncRNA	AC138028.4	1.02712	0.0062293
ENSG00000246090	lncRNA	AP002026.1	1.01443	3.85539e-05
ENSG00000255495	lncRNA	AC145124.1	1.01312	0.00110492
ENSG00000226904	lncRNA	AL353608.2	1.00922	0.0493251
ENSG00000286337	lncRNA	AC025370.2	1.00696	0.00179529
ENSG00000287967	lncRNA	AC004882.4	1.00666	0.0093757
ENSG00000229807	lncRNA	XIST	1.00393	0.00183615
ENSG00000261243	lncRNA	AC022165.1	1.0036	0.0132554
ENSG00000234902	lncRNA	AC007879.3	1.00202	0.0090082
ENSG00000234694	lncRNA	AL139289.1	-1.00809	0.0287612
ENSG00000235919	lncRNA	ASH1L-AS1	-1.00895	0.0426344
ENSG00000259943	lncRNA	AL050341.2	-1.00953	0.00862043
ENSG00000273117	lncRNA	AC144652.1	-1.01089	0.00236487
ENSG00000272092	lncRNA	AC087623.2	-1.01431	0.0192269
ENSG00000285668	lncRNA	AC126544.2	-1.01595	0.0251703
ENSG00000260581	lncRNA	AC011374.1	-1.01599	0.0104018
ENSG00000227403	lncRNA	LINC01806	-1.01699	0.000335498
ENSG00000272009	lncRNA	AL121944.2	-1.01971	0.020007
ENSG00000272604	lncRNA	AC073073.2	-1.02023	0.0175026
ENSG00000226240	lncRNA	LINC00381	-1.02346	0.00432575
ENSG00000248663	lncRNA	LINC00992	-1.02678	0.00783513
ENSG00000224020	lncRNA	MIR181A2HG	-1.03104	0.0359408
ENSG00000271754	lncRNA	AL355802.3	-1.04223	0.0131353
ENSG00000228889	lncRNA	UBAC2-AS1	-1.04349	6.3522e-05
ENSG00000271853	lncRNA	AL162258.1	-1.04538	0.0143682
ENSG00000270580	lncRNA	AC139256.3	-1.04688	0.00153393
ENSG00000272913	lncRNA	AC009237.14	-1.05463	0.00765775
ENSG00000272476	lncRNA	AL024507.3	-1.05534	0.000662668
ENSG00000267757	lncRNA	EML2-AS1	-1.05801	0.00119091
ENSG00000260018	lncRNA	AC040169.1	-1.06406	0.030887
ENSG00000271737	lncRNA	AC008608.2	-1.0675	0.0371138
ENSG00000268536	lncRNA	AC005523.1	-1.07408	5.7164e-06
ENSG00000236740	lncRNA	AL033384.1	-1.07423	0.00405884
ENSG00000272087	lncRNA	AC080013.4	-1.07955	0.0189034
ENSG00000247271	lncRNA	ZBED5-AS1	-1.08117	2.64181e-05
ENSG00000257681	lncRNA	AC025265.1	-1.08593	0.00189722
ENSG00000237149	lncRNA	ZNF503-AS2	-1.09146	0.00303709
ENSG00000288066	lncRNA	AC097448.1	-1.09917	0.00161481
ENSG00000239467	lncRNA	AC007405.4	-1.10155	0.000537603
ENSG00000222020	lncRNA	HDAC4-AS1	-1.11483	0.0143985
ENSG00000274425	lncRNA	AC114271.1	-1.11522	0.032034
ENSG00000260025	lncRNA	CRIM1-DT	-1.11649	0.000194269
ENSG00000272121	lncRNA	AC006058.3	-1.12059	0.0146278
ENSG00000285933	lncRNA	AP003498.3	-1.12067	0.000110058
ENSG00000268205	lncRNA	AC005261.2	-1.1214	0.00693493
ENSG00000286104	lncRNA	AC016629.3	-1.12513	0.00013987
ENSG00000256628	lncRNA	ZBTB11-AS1	-1.13172	0.00232876
ENSG00000257167	lncRNA	TMPO-AS1	-1.13587	0.00262972
ENSG00000272269	lncRNA	AL138724.2	-1.13679	0.0448979
ENSG00000255031	lncRNA	AP002807.1	-1.14957	0.000129514
ENSG00000272115	lncRNA	AC233992.3	-1.15619	0.000944644
ENSG00000221990	lncRNA	EXOC3-AS1	-1.15929	0.00196751
ENSG00000264278	lncRNA	ZNF236-DT	-1.16014	0.000484123
ENSG00000281398	lncRNA	SNHG4	-1.16172	0.000407704
ENSG00000196756	lncRNA	SNHG17	-1.16221	0.000795763
ENSG00000270953	lncRNA	AC007938.3	-1.17242	0.0207976
ENSG00000260228	lncRNA	AC009119.1	-1.18162	0.000337989
ENSG00000176659	lncRNA	C20orf197	-1.18382	0.00528212
ENSG00000272079	lncRNA	AC004233.2	-1.18477	0.00186603
ENSG00000225339	lncRNA	AL354740.1	-1.18599	0.00212404
ENSG00000273132	lncRNA	AL355312.4	-1.18655	0.033541
ENSG00000257605	lncRNA	AC073611.1	-1.18874	0.022051
ENSG00000268713	lncRNA	AC005261.4	-1.19217	0.0118443
ENSG00000267249	lncRNA	AP005482.4	-1.19939	0.00284738
ENSG00000272711	lncRNA	AC019069.1	-1.20339	1.12509e-05
ENSG00000212978	lncRNA	AC016747.1	-1.20667	0.000136521
ENSG00000257264	lncRNA	AC136443.3	-1.21833	0.00481986
ENSG00000273137	lncRNA	AL022328.2	-1.22105	0.000424364
ENSG00000230733	lncRNA	AC092171.2	-1.22579	0.0067802
ENSG00000272523	lncRNA	LINC01023	-1.22627	0.0195305
ENSG00000266962	lncRNA	AC067852.2	-1.22899	5.66296e-05
ENSG00000175061	lncRNA	SNHG29	-1.23117	0.00011598
ENSG00000248866	lncRNA	USP46-AS1	-1.23179	0.0120279
ENSG00000261762	lncRNA	AC027228.2	-1.23319	0.00308342
ENSG00000272744	lncRNA	AC107214.2	-1.24487	0.00166708
ENSG00000240731	lncRNA	AL139287.1	-1.24523	0.0163753
ENSG00000260267	lncRNA	AC026471.1	-1.2485	0.00173259
ENSG00000272263	lncRNA	AC034198.2	-1.25026	0.0138828
ENSG00000273311	lncRNA	DGCR11	-1.25358	1.62681e-05
ENSG00000273253	lncRNA	AL022328.4	-1.26053	0.00984536
ENSG00000269910	lncRNA	AL049840.4	-1.26142	0.0124157
ENSG00000270062	lncRNA	AL606834.2	-1.26321	0.00340687
ENSG00000224032	lncRNA	EPB41L4A-AS1	-1.27787	5.90443e-05
ENSG00000229152	lncRNA	ANKRD10-IT1	-1.27914	0.01375
ENSG00000273314	lncRNA	AC005229.4	-1.29019	0.000402202
ENSG00000226853	lncRNA	AC010894.2	-1.29324	0.00162322
ENSG00000269352	lncRNA	PTOV1-AS2	-1.29366	0.000545037
ENSG00000262202	lncRNA	AC007952.4	-1.2966	0.0414123
ENSG00000275854	lncRNA	AC084824.5	-1.30795	0.000343737
ENSG00000272040	lncRNA	AC010245.2	-1.30967	0.00193651
ENSG00000167920	lncRNA	TMEM99	-1.31054	0.00136616
ENSG00000177410	lncRNA	ZFAS1	-1.31748	5.65829e-06
ENSG00000246228	lncRNA	CASC8	-1.32786	0.00655538
ENSG00000267279	lncRNA	AC090409.1	-1.3301	0.000228925
ENSG00000273038	lncRNA	AL365203.2	-1.33452	0.000102656
ENSG00000276855	lncRNA	AC015922.3	-1.34732	0.0272771
ENSG00000259230	lncRNA	LINC02323	-1.34869	0.0015138
ENSG00000232956	lncRNA	SNHG15	-1.36058	0.00445076
ENSG00000265393	lncRNA	AC084125.4	-1.36641	0.0165882
ENSG00000237943	lncRNA	PRKCQ-AS1	-1.36653	2.95278e-05
ENSG00000242516	lncRNA	LINC00960	-1.36698	7.37683e-05
ENSG00000286883	lncRNA	AC005041.5	-1.36707	0.0103351
ENSG00000213599	lncRNA	SLX1A-SULT1A3	-1.37184	0.00092464
ENSG00000287929	lncRNA	AL354953.1	-1.37428	0.00912327
ENSG00000273420	lncRNA	AC008738.7	-1.38046	0.000675598
ENSG00000280614	lncRNA	FP236383.4	-1.38532	0.0355633
ENSG00000280800	lncRNA	FP671120.7	-1.38642	0.0390235
ENSG00000272345	lncRNA	AL031775.1	-1.40586	0.0189811
ENSG00000278970	lncRNA	HEIH	-1.41017	0.00185055
ENSG00000275964	lncRNA	AL355001.2	-1.41158	0.0047893
ENSG00000237310	lncRNA	AC008267.5	-1.4123	0.016806
ENSG00000274213	lncRNA	AC015912.3	-1.41251	0.00859245
ENSG00000273972	lncRNA	AC068722.2	-1.41326	0.0246404
ENSG00000281181	lncRNA	FP236383.5	-1.42367	0.0328842
ENSG00000238266	lncRNA	LINC00707	-1.42804	0.00200025
ENSG00000260274	lncRNA	AC068338.2	-1.42994	0.00333283
ENSG00000228843	lncRNA	AL133410.2	-1.45106	0.00689493
ENSG00000274561	lncRNA	AC005332.3	-1.48615	0.00934605
ENSG00000240040	lncRNA	AC244205.1	-1.4954	0.000918063
ENSG00000273619	lncRNA	AL121832.2	-1.50223	0.0092492
ENSG00000276077	lncRNA	CU633904.2	-1.50276	0.00166113
ENSG00000259985	lncRNA	AC017100.1	-1.52073	5.13521e-05
ENSG00000270084	lncRNA	GAS5-AS1	-1.52574	1.4615e-05
ENSG00000214401	lncRNA	KANSL1-AS1	-1.53373	0.000307309
ENSG00000243486	lncRNA	AC068985.2	-1.53983	5.1028e-05
ENSG00000233429	lncRNA	HOTAIRM1	-1.54976	2.74087e-05
ENSG00000234741	lncRNA	GAS5	-1.55255	0.000501989
ENSG00000257925	lncRNA	AC008083.2	-1.55288	0.000238566
ENSG00000261455	lncRNA	LINC01003	-1.5571	0.00177941
ENSG00000261183	lncRNA	SPINT1-AS1	-1.55779	0.00180573
ENSG00000273226	lncRNA	AL391834.2	-1.5609	0.00344716
ENSG00000257181	lncRNA	AC025423.4	-1.5757	0.018808
ENSG00000284707	lncRNA	AC079781.5	-1.58209	0.00779247
ENSG00000272686	lncRNA	AC006333.1	-1.59731	0.000959689
ENSG00000230082	lncRNA	PRRT3-AS1	-1.60349	0.000647024
ENSG00000272155	lncRNA	AC055822.1	-1.60613	0.000149044
ENSG00000254531	lncRNA	AP001816.1	-1.62972	0.00044791
ENSG00000261600	lncRNA	AC233266.2	-1.63285	0.00273852
ENSG00000273568	lncRNA	AC131009.3	-1.63579	0.000710536
ENSG00000259607	lncRNA	AC108449.3	-1.63595	0.00339465
ENSG00000275764	lncRNA	AC092747.4	-1.67716	0.00419264
ENSG00000273338	lncRNA	AC103591.3	-1.68245	1.00049e-06
ENSG00000255198	lncRNA	SNHG9	-1.68512	4.12238e-05
ENSG00000267108	lncRNA	AP001029.1	-1.6871	0.000330372
ENSG00000254665	lncRNA	AC091053.1	-1.69783	0.0456534
ENSG00000273014	lncRNA	AC018645.3	-1.69786	6.31801e-06
ENSG00000253174	lncRNA	AC009630.2	-1.70161	0.0028195
ENSG00000272777	lncRNA	AC019131.2	-1.70595	0.000248315
ENSG00000203875	lncRNA	SNHG5	-1.72129	2.82498e-06
ENSG00000269176	lncRNA	AP001160.3	-1.7373	0.000275195
ENSG00000260265	lncRNA	LINC02562	-1.74617	6.27265e-06
ENSG00000258920	lncRNA	FOXN3-AS1	-1.74706	8.15719e-05
ENSG00000267688	lncRNA	KF456478.1	-1.80811	0.000335342
ENSG00000232527	lncRNA	LINC02802	-1.81097	4.11328e-05
ENSG00000273680	lncRNA	AC009318.2	-1.83588	0.00780124
ENSG00000257527	lncRNA	AC126755.3	-1.8397	1.71194e-05
ENSG00000248101	lncRNA	AC002116.1	-1.85365	0.00631728
ENSG00000263165	lncRNA	AC087292.2	-1.86407	0.00475931
ENSG00000230896	lncRNA	AL604028.1	-1.9066	0.0045522
ENSG00000255737	lncRNA	AGAP2-AS1	-1.91562	0.000140876
ENSG00000263731	lncRNA	AC145207.5	-1.92366	1.27658e-05
ENSG00000265415	lncRNA	AC099850.4	-1.93028	0.0013014
ENSG00000272159	lncRNA	AC087623.3	-1.9593	0.000884106
ENSG00000281453	lncRNA	TGFB2-OT1	-1.96312	0.0204663
ENSG00000204387	lncRNA	SNHG32	-1.97539	7.48307e-06
ENSG00000226950	lncRNA	DANCR	-1.98611	3.11047e-07
ENSG00000272449	lncRNA	AL139246.5	-2.02092	1.21015e-05
ENSG00000233016	lncRNA	SNHG7	-2.0617	8.36139e-06
ENSG00000269958	lncRNA	AL049840.6	-2.07228	0.000940294
ENSG00000228748	lncRNA	AL450306.1	-2.09609	0.000127111
ENSG00000263859	lncRNA	AC145207.6	-2.09855	0.000296929
ENSG00000273489	lncRNA	AC008264.2	-2.13263	0.000115176
ENSG00000260257	lncRNA	AL035071.1	-2.15736	0.000113806
ENSG00000266651	lncRNA	AC093484.4	-2.17011	6.16969e-05
ENSG00000256940	lncRNA	PPP1R14B-AS1	-2.18992	9.99771e-05
ENSG00000234327	lncRNA	AC012146.1	-2.19348	0.00592749
ENSG00000276851	lncRNA	AC002401.4	-2.20404	0.00146804
ENSG00000254501	lncRNA	AP003068.1	-2.29151	0.000943343
ENSG00000261092	lncRNA	LINC02178	-2.33075	0.00164035
ENSG00000267073	lncRNA	AC005256.1	-2.36182	0.0134226
ENSG00000272888	lncRNA	LINC01578	-2.36745	0.00187665
ENSG00000227617	lncRNA	CERS6-AS1	-2.40816	4.49541e-06
ENSG00000245910	lncRNA	SNHG6	-2.45118	6.22762e-05
ENSG00000259049	lncRNA	AL139317.3	-2.58727	0.00511404
ENSG00000260260	lncRNA	SNHG19	-2.61452	7.39626e-05
ENSG00000228830	lncRNA	AL160408.2	-2.69938	0.00381303
ENSG00000176868	lncRNA	AL358781.1	-2.72826	0.00752108
ENSG00000273361	lncRNA	AC021016.3	-2.80154	0.000165538
ENSG00000259623	lncRNA	AC125257.1	-2.88983	0.00038122
ENSG00000259865	lncRNA	AL390728.6	-2.93301	7.48925e-08
ENSG00000093100	lncRNA	AC016026.1	-3.0209	1.9294e-05
ENSG00000285608	lncRNA	AL161665.1	-3.09173	0.00108452
ENSG00000203644	lncRNA	AC083799.1	-3.13539	0.000346891
ENSG00000260899	lncRNA	AC106886.2	-3.16698	8.37621e-07
ENSG00000261759	lncRNA	AC099518.5	-3.37649	0.000826401
ENSG00000254873	lncRNA	AP001267.1	-3.46302	0.00101741
ENSG00000260772	lncRNA	AC012321.1	-3.54146	2.68262e-05
ENSG00000261641	lncRNA	AL031600.3	-3.60515	0.000228277
ENSG00000219410	lncRNA	AC125494.1	-3.64637	4.44749e-06
ENSG00000267576	lncRNA	AC011472.3	-3.90823	2.75973e-05
ENSG00000269243	lncRNA	AC008894.2	-3.949	5.855e-06
ENSG00000258749	lncRNA	AL110504.1	-4.30464	5.9421e-07
ENSG00000257453	lncRNA	AC011611.3	-5.05645	6.75162e-06
ENSG00000258232	lncRNA	AC125611.3	-9.56562	2.76159e-07
