# Supplementary material for: Protein Coding and Long Noncoding RNA (lncRNA) Transcriptional Landscape in SARS-CoV-2 Infected Bronchial Epithelial Cells Highlight a Role for Interferon and Inflammatory Response
Source: Genes (Basel). 2020 Jul 7;11(7):760. doi: 10.3390/genes11070760 (PMC7397219; doi:10.3390/genes11070760)
Supplement: Supplementary file 1 [file genes-11-00760-s001.zip › Supplementary table 8.xlsx]

## Sheet: GE.COV19_vs_Normal-fold2.0_rawp
Supplementary table 8. Differentially expresed mRNA and lncRNA in lung tissue from COVID-19 patient compared to healthy subject.
GeneID (Regulation criterion: fold > 2.0 and rawp p-value < 0.05)	Gene stable ID	Gene type	Gene name	COV19_vs_Normal-log_fold	COV19_vs_Normal-p_value
ENSG00000276085	ENSG00000276085	protein_coding	CCL3L3	9.71707	0.0350901
ENSG00000276070	ENSG00000276070	protein_coding	CCL4L2	9.51445	0.0148423
ENSG00000188404	ENSG00000188404	protein_coding	SELL	8.20768	0.000320114
ENSG00000275302	ENSG00000275302	protein_coding	CCL4	8.01239	0.0148762
ENSG00000181617	ENSG00000181617	protein_coding	FDCSP	7.84866	9.08052e-05
ENSG00000163221	ENSG00000163221	protein_coding	S100A12	7.63537	0.0108323
ENSG00000166523	ENSG00000166523	protein_coding	CLEC4E	7.15133	3.81372e-05
ENSG00000169385	ENSG00000169385	protein_coding	RNASE2	6.83023	0.000834203
ENSG00000147168	ENSG00000147168	protein_coding	IL2RG	6.8132	0.00971456
ENSG00000181631	ENSG00000181631	protein_coding	P2RY13	6.74396	0.000302914
ENSG00000102794	ENSG00000102794	protein_coding	ACOD1	6.71914	0.00214973
ENSG00000108700	ENSG00000108700	protein_coding	CCL8	6.61034	0.00401228
ENSG00000126709	ENSG00000126709	protein_coding	IFI6	6.54828	0.000738377
ENSG00000126262	ENSG00000126262	protein_coding	FFAR2	6.49904	0.00114638
ENSG00000158869	ENSG00000158869	protein_coding	FCER1G	6.4788	0.00359857
ENSG00000128383	ENSG00000128383	protein_coding	APOBEC3A	6.38387	0.00501443
ENSG00000136689	ENSG00000136689	protein_coding	IL1RN	6.26723	0.0254273
ENSG00000254415	ENSG00000254415	protein_coding	SIGLEC14	6.19827	0.0233268
ENSG00000166527	ENSG00000166527	protein_coding	CLEC4D	6.14185	0.00159139
ENSG00000185201	ENSG00000185201	protein_coding	IFITM2	6.05761	0.00065075
ENSG00000180953	ENSG00000180953	protein_coding	ST20	6.02287	0.00242631
ENSG00000115956	ENSG00000115956	protein_coding	PLEK	5.97809	0.00205157
ENSG00000184258	ENSG00000184258	protein_coding	CDR1	5.93815	0.00419548
ENSG00000162747	ENSG00000162747	protein_coding	FCGR3B	5.90152	0.0241568
ENSG00000140379	ENSG00000140379	protein_coding	BCL2A1	5.89593	0.00364692
ENSG00000185745	ENSG00000185745	protein_coding	IFIT1	5.89505	0.0048519
ENSG00000173391	ENSG00000173391	protein_coding	OLR1	5.89317	0.00494964
ENSG00000111331	ENSG00000111331	protein_coding	OAS3	5.8591	0.0167761
ENSG00000172156	ENSG00000172156	protein_coding	CCL11	5.85696	0.00787857
ENSG00000008438	ENSG00000008438	protein_coding	PGLYRP1	5.80685	0.0155971
ENSG00000119922	ENSG00000119922	protein_coding	IFIT2	5.68494	0.0109768
ENSG00000137757	ENSG00000137757	protein_coding	CASP5	5.67639	0.000456555
ENSG00000035720	ENSG00000035720	protein_coding	STAP1	5.66298	7.62511e-05
ENSG00000158825	ENSG00000158825	protein_coding	CDA	5.65879	0.0194324
ENSG00000132965	ENSG00000132965	protein_coding	ALOX5AP	5.63246	0.0004117
ENSG00000139572	ENSG00000139572	protein_coding	GPR84	5.57879	0.00865266
ENSG00000089127	ENSG00000089127	protein_coding	OAS1	5.56364	0.00419909
ENSG00000143546	ENSG00000143546	protein_coding	S100A8	5.54511	0.0148888
ENSG00000103569	ENSG00000103569	protein_coding	AQP9	5.48483	0.0156045
ENSG00000154589	ENSG00000154589	protein_coding	LY96	5.46533	0.00210243
ENSG00000119917	ENSG00000119917	protein_coding	IFIT3	5.45938	0.0071606
ENSG00000108688	ENSG00000108688	protein_coding	CCL7	5.41784	0.0159684
ENSG00000255221	ENSG00000255221	protein_coding	CARD17	5.38398	0.00642522
ENSG00000183486	ENSG00000183486	protein_coding	MX2	5.30341	0.00646767
ENSG00000140749	ENSG00000140749	protein_coding	IGSF6	5.28469	0.00280386
ENSG00000244482	ENSG00000244482	protein_coding	LILRA6	5.2604	0.00356987
ENSG00000111335	ENSG00000111335	protein_coding	OAS2	5.25424	0.0161297
ENSG00000175857	ENSG00000175857	protein_coding	GAPT	5.23785	0.000348889
ENSG00000102524	ENSG00000102524	protein_coding	TNFSF13B	5.15428	0.0101089
ENSG00000122643	ENSG00000122643	protein_coding	NT5C3A	5.1436	0.00570706
ENSG00000105205	ENSG00000105205	protein_coding	CLC	5.07547	0.0046616
ENSG00000176153	ENSG00000176153	protein_coding	GPX2	5.0401	0.00962344
ENSG00000177409	ENSG00000177409	protein_coding	SAMD9L	5.03692	0.015632
ENSG00000070190	ENSG00000070190	protein_coding	DAPP1	4.98199	0.00150316
ENSG00000133048	ENSG00000133048	protein_coding	CHI3L1	4.82834	0.0452883
ENSG00000168421	ENSG00000168421	protein_coding	RHOH	4.82285	0.0108155
ENSG00000118113	ENSG00000118113	protein_coding	MMP8	4.79707	0.00350311
ENSG00000205413	ENSG00000205413	protein_coding	SAMD9	4.7946	0.0116977
ENSG00000187608	ENSG00000187608	protein_coding	ISG15	4.77284	0.00896249
ENSG00000079385	ENSG00000079385	protein_coding	CEACAM1	4.77278	0.0375904
ENSG00000171051	ENSG00000171051	protein_coding	FPR1	4.7515	0.0071415
ENSG00000015285	ENSG00000015285	protein_coding	WAS	4.74558	0.000735187
ENSG00000154451	ENSG00000154451	protein_coding	GBP5	4.74409	0.0249291
ENSG00000064886	ENSG00000064886	protein_coding	CHI3L2	4.73884	0.0216079
ENSG00000163563	ENSG00000163563	protein_coding	MNDA	4.70595	0.0177918
ENSG00000204397	ENSG00000204397	protein_coding	CARD16	4.6619	0.0163794
ENSG00000181381	ENSG00000181381	protein_coding	DDX60L	4.65091	0.00418975
ENSG00000121552	ENSG00000121552	protein_coding	CSTA	4.64643	0.00493744
ENSG00000232810	ENSG00000232810	protein_coding	TNF	4.64557	0.0309195
ENSG00000079263	ENSG00000079263	protein_coding	SP140	4.57674	0.00372999
ENSG00000122862	ENSG00000122862	protein_coding	SRGN	4.53304	0.0130808
ENSG00000196565	ENSG00000196565	protein_coding	HBG2	4.49318	0.0207486
ENSG00000123700	ENSG00000123700	protein_coding	KCNJ2	4.46247	0.013393
ENSG00000275183	ENSG00000275183	protein_coding	LENG9	4.43613	0.0266405
ENSG00000085265	ENSG00000085265	protein_coding	FCN1	4.41355	0.0216691
ENSG00000055332	ENSG00000055332	protein_coding	EIF2AK2	4.35354	0.00331522
ENSG00000059728	ENSG00000059728	protein_coding	MXD1	4.3406	0.00171477
ENSG00000138646	ENSG00000138646	protein_coding	HERC5	4.32273	0.0146479
ENSG00000259332	ENSG00000259332	protein_coding	ST20-MTHFS	4.28976	0.000227973
ENSG00000043462	ENSG00000043462	protein_coding	LCP2	4.22177	0.0254928
ENSG00000163220	ENSG00000163220	protein_coding	S100A9	4.22	0.0152947
ENSG00000170956	ENSG00000170956	protein_coding	CEACAM3	4.21893	0.0161119
ENSG00000163666	ENSG00000163666	protein_coding	HESX1	4.20545	0.000175123
ENSG00000170542	ENSG00000170542	protein_coding	SERPINB9	4.20365	0.0211404
ENSG00000196684	ENSG00000196684	protein_coding	HSH2D	4.20329	0.00209895
ENSG00000008056	ENSG00000008056	protein_coding	SYN1	4.17853	0.0114722
ENSG00000157601	ENSG00000157601	protein_coding	MX1	4.15112	0.00196881
ENSG00000143119	ENSG00000143119	protein_coding	CD53	4.13389	0.0269534
ENSG00000137959	ENSG00000137959	protein_coding	IFI44L	4.10681	0.0151931
ENSG00000111729	ENSG00000111729	protein_coding	CLEC4A	4.09763	0.00333409
ENSG00000104894	ENSG00000104894	protein_coding	CD37	4.09672	0.000169932
ENSG00000172724	ENSG00000172724	protein_coding	CCL19	4.08528	0.000482277
ENSG00000124256	ENSG00000124256	protein_coding	ZBP1	4.02024	0.000642231
ENSG00000121858	ENSG00000121858	protein_coding	TNFSF10	4.01663	0.00073734
ENSG00000120280	ENSG00000120280	protein_coding	CXorf21	4.00307	0.000405141
ENSG00000285938	ENSG00000285938	protein_coding	AC072022.2	3.98201	0.00444386
ENSG00000104320	ENSG00000104320	protein_coding	NBN	3.98157	0.00698262
ENSG00000187116	ENSG00000187116	protein_coding	LILRA5	3.97386	0.00550052
ENSG00000152766	ENSG00000152766	protein_coding	ANKRD22	3.97143	0.00889637
ENSG00000011600	ENSG00000011600	protein_coding	TYROBP	3.96893	0.000201929
ENSG00000119535	ENSG00000119535	protein_coding	CSF3R	3.9529	0.00168996
ENSG00000187037	ENSG00000187037	protein_coding	GPR141	3.92282	0.000381776
ENSG00000197253	ENSG00000197253	protein_coding	TPSB2	3.91276	0.030459
ENSG00000277443	ENSG00000277443	protein_coding	MARCKS	3.91124	0.0381777
ENSG00000174837	ENSG00000174837	protein_coding	ADGRE1	3.90669	0.00263666
ENSG00000066336	ENSG00000066336	protein_coding	SPI1	3.89395	0.00310482
ENSG00000101342	ENSG00000101342	protein_coding	TLDC2	3.88302	0.00337176
ENSG00000203812	ENSG00000203812	protein_coding	H2AC18	3.87706	0.0142022
ENSG00000131979	ENSG00000131979	protein_coding	GCH1	3.86423	0.0187917
ENSG00000141480	ENSG00000141480	protein_coding	ARRB2	3.863	0.00248866
ENSG00000204482	ENSG00000204482	protein_coding	LST1	3.86047	0.0296628
ENSG00000203814	ENSG00000203814	protein_coding	H2BC18	3.80598	0.0323155
ENSG00000277203	ENSG00000277203	protein_coding	F8A1	3.80166	0.00325935
ENSG00000111913	ENSG00000111913	protein_coding	RIPOR2	3.80076	0.00047464
ENSG00000105967	ENSG00000105967	protein_coding	TFEC	3.78438	0.0207562
ENSG00000117115	ENSG00000117115	protein_coding	PADI2	3.76906	0.00035657
ENSG00000163191	ENSG00000163191	protein_coding	S100A11	3.76764	0.00881547
ENSG00000124731	ENSG00000124731	protein_coding	TREM1	3.75594	0.00294368
ENSG00000135114	ENSG00000135114	protein_coding	OASL	3.75398	0.0393029
ENSG00000133106	ENSG00000133106	protein_coding	EPSTI1	3.73953	0.0269416
ENSG00000185885	ENSG00000185885	protein_coding	IFITM1	3.73516	0.000707333
ENSG00000108602	ENSG00000108602	protein_coding	ALDH3A1	3.73242	0.0213327
ENSG00000129451	ENSG00000129451	protein_coding	KLK10	3.66123	0.00580501
ENSG00000185862	ENSG00000185862	protein_coding	EVI2B	3.65851	0.00181471
ENSG00000150681	ENSG00000150681	protein_coding	RGS18	3.65308	0.00452506
ENSG00000165071	ENSG00000165071	protein_coding	TMEM71	3.63227	0.000110316
ENSG00000146094	ENSG00000146094	protein_coding	DOK3	3.62973	0.000692599
ENSG00000163993	ENSG00000163993	protein_coding	S100P	3.58694	0.00106461
ENSG00000171860	ENSG00000171860	protein_coding	C3AR1	3.5597	0.0289275
ENSG00000166889	ENSG00000166889	protein_coding	PATL1	3.55578	0.032341
ENSG00000152229	ENSG00000152229	protein_coding	PSTPIP2	3.55124	0.0271723
ENSG00000105697	ENSG00000105697	protein_coding	HAMP	3.54933	0.00916286
ENSG00000180596	ENSG00000180596	protein_coding	H2BC4	3.54837	0.00661296
ENSG00000172243	ENSG00000172243	protein_coding	CLEC7A	3.54061	0.0101479
ENSG00000142089	ENSG00000142089	protein_coding	IFITM3	3.53369	0.000655505
ENSG00000159496	ENSG00000159496	protein_coding	RGL4	3.52853	0.000922597
ENSG00000000938	ENSG00000000938	protein_coding	FGR	3.52082	0.00359103
ENSG00000175567	ENSG00000175567	protein_coding	UCP2	3.52078	0.0059718
ENSG00000176788	ENSG00000176788	protein_coding	BASP1	3.52053	0.00901775
ENSG00000082074	ENSG00000082074	protein_coding	FYB1	3.51804	0.00164739
ENSG00000154099	ENSG00000154099	protein_coding	DNAAF1	3.51049	0.0266405
ENSG00000184678	ENSG00000184678	protein_coding	H2BC21	3.49342	0.00877267
ENSG00000101307	ENSG00000101307	protein_coding	SIRPB1	3.485	0.00362696
ENSG00000136167	ENSG00000136167	protein_coding	LCP1	3.47327	0.0084322
ENSG00000174944	ENSG00000174944	protein_coding	P2RY14	3.47307	0.00612167
ENSG00000155307	ENSG00000155307	protein_coding	SAMSN1	3.43909	0.0216893
ENSG00000162551	ENSG00000162551	protein_coding	ALPL	3.42266	0.0271335
ENSG00000145287	ENSG00000145287	protein_coding	PLAC8	3.40421	0.00326427
ENSG00000153976	ENSG00000153976	protein_coding	HS3ST3A1	3.3964	0.0209811
ENSG00000116514	ENSG00000116514	protein_coding	RNF19B	3.3862	0.0319431
ENSG00000112343	ENSG00000112343	protein_coding	TRIM38	3.37857	0.00433721
ENSG00000222009	ENSG00000222009	protein_coding	BTBD19	3.37552	0.000898673
ENSG00000133328	ENSG00000133328	protein_coding	PLAAT2	3.35229	0.0439617
ENSG00000159189	ENSG00000159189	protein_coding	C1QC	3.334	0.00168955
ENSG00000129988	ENSG00000129988	protein_coding	LBP	3.30922	0.0098111
ENSG00000169397	ENSG00000169397	protein_coding	RNASE3	3.29972	0.032666
ENSG00000136514	ENSG00000136514	protein_coding	RTP4	3.29702	0.0102814
ENSG00000078081	ENSG00000078081	protein_coding	LAMP3	3.27619	0.0184065
ENSG00000107201	ENSG00000107201	protein_coding	DDX58	3.26606	0.0260587
ENSG00000184979	ENSG00000184979	protein_coding	USP18	3.25486	0.0156933
ENSG00000138207	ENSG00000138207	protein_coding	RBP4	3.24946	0.0268995
ENSG00000128340	ENSG00000128340	protein_coding	RAC2	3.23426	0.00334302
ENSG00000135899	ENSG00000135899	protein_coding	SP110	3.23351	0.00324614
ENSG00000085514	ENSG00000085514	protein_coding	PILRA	3.23203	0.019214
ENSG00000170439	ENSG00000170439	protein_coding	METTL7B	3.22037	0.000225249
ENSG00000163823	ENSG00000163823	protein_coding	CCR1	3.20879	0.0254759
ENSG00000120899	ENSG00000120899	protein_coding	PTK2B	3.18017	0.00234769
ENSG00000167604	ENSG00000167604	protein_coding	NFKBID	3.17876	0.00715131
ENSG00000203785	ENSG00000203785	protein_coding	SPRR2E	3.11724	0.0226222
ENSG00000152778	ENSG00000152778	protein_coding	IFIT5	3.11196	0.0260791
ENSG00000174021	ENSG00000174021	protein_coding	GNG5	3.11086	0.0118517
ENSG00000121380	ENSG00000121380	protein_coding	BCL2L14	3.09643	0.00172626
ENSG00000109743	ENSG00000109743	protein_coding	BST1	3.09563	0.00445379
ENSG00000127951	ENSG00000127951	protein_coding	FGL2	3.08505	0.00307293
ENSG00000113368	ENSG00000113368	protein_coding	LMNB1	3.07305	0.0145026
ENSG00000258644	ENSG00000258644	protein_coding	SYNJ2BP-COX16	3.05577	0.0449834
ENSG00000125735	ENSG00000125735	protein_coding	TNFSF14	3.04034	0.0320871
ENSG00000198673	ENSG00000198673	protein_coding	TAFA2	3.01379	0.0101433
ENSG00000111348	ENSG00000111348	protein_coding	ARHGDIB	3.00866	0.0122223
ENSG00000115271	ENSG00000115271	protein_coding	GCA	2.99771	0.00790819
ENSG00000077420	ENSG00000077420	protein_coding	APBB1IP	2.99085	0.0205789
ENSG00000197249	ENSG00000197249	protein_coding	SERPINA1	2.98551	0.0175009
ENSG00000123191	ENSG00000123191	protein_coding	ATP7B	2.97941	0.00410139
ENSG00000180573	ENSG00000180573	protein_coding	H2AC6	2.97425	0.0127952
ENSG00000275385	ENSG00000275385	protein_coding	CCL18	2.94513	0.0304281
ENSG00000168995	ENSG00000168995	protein_coding	SIGLEC7	2.92648	0.0180279
ENSG00000172322	ENSG00000172322	protein_coding	CLEC12A	2.92502	0.0206192
ENSG00000004468	ENSG00000004468	protein_coding	CD38	2.91278	0.0067196
ENSG00000257017	ENSG00000257017	protein_coding	HP	2.90613	0.00489074
ENSG00000130813	ENSG00000130813	protein_coding	SHFL	2.90545	0.00295968
ENSG00000168961	ENSG00000168961	protein_coding	LGALS9	2.89794	0.0055669
ENSG00000012223	ENSG00000012223	protein_coding	LTF	2.88622	0.0110733
ENSG00000130522	ENSG00000130522	protein_coding	JUND	2.88437	0.00346155
ENSG00000189430	ENSG00000189430	protein_coding	NCR1	2.86197	0.0415071
ENSG00000105939	ENSG00000105939	protein_coding	ZC3HAV1	2.82456	0.00475417
ENSG00000182472	ENSG00000182472	protein_coding	CAPN12	2.80568	0.00177159
ENSG00000173597	ENSG00000173597	protein_coding	SULT1B1	2.80148	0.0142418
ENSG00000177721	ENSG00000177721	protein_coding	ANXA2R	2.79252	0.00118586
ENSG00000137869	ENSG00000137869	protein_coding	CYP19A1	2.79232	0.000459947
ENSG00000138670	ENSG00000138670	protein_coding	RASGEF1B	2.79182	0.00824113
ENSG00000204577	ENSG00000204577	protein_coding	LILRB3	2.77499	0.024415
ENSG00000159335	ENSG00000159335	protein_coding	PTMS	2.76095	0.015685
ENSG00000138378	ENSG00000138378	protein_coding	STAT4	2.74101	0.0327978
ENSG00000167461	ENSG00000167461	protein_coding	RAB8A	2.71479	0.0120107
ENSG00000161921	ENSG00000161921	protein_coding	CXCL16	2.68199	0.00533342
ENSG00000131042	ENSG00000131042	protein_coding	LILRB2	2.67613	0.0115824
ENSG00000115204	ENSG00000115204	protein_coding	MPV17	2.66449	0.00458742
ENSG00000121316	ENSG00000121316	protein_coding	PLBD1	2.66324	0.0022902
ENSG00000093072	ENSG00000093072	protein_coding	ADA2	2.66206	0.00554973
ENSG00000163958	ENSG00000163958	protein_coding	ZDHHC19	2.65613	0.0362421
ENSG00000143226	ENSG00000143226	protein_coding	FCGR2A	2.65114	0.0499249
ENSG00000184221	ENSG00000184221	protein_coding	OLIG1	2.64969	0.0347165
ENSG00000180628	ENSG00000180628	protein_coding	PCGF5	2.63124	0.0339708
ENSG00000069399	ENSG00000069399	protein_coding	BCL3	2.62778	0.00434249
ENSG00000120306	ENSG00000120306	protein_coding	CYSTM1	2.62186	0.0267263
ENSG00000132109	ENSG00000132109	protein_coding	TRIM21	2.59699	0.0119238
ENSG00000156050	ENSG00000156050	protein_coding	FAM161B	2.59666	0.00228266
ENSG00000150337	ENSG00000150337	protein_coding	FCGR1A	2.59066	0.00734944
ENSG00000156587	ENSG00000156587	protein_coding	UBE2L6	2.58117	0.00465394
ENSG00000008516	ENSG00000008516	protein_coding	MMP25	2.57723	0.0203695
ENSG00000205155	ENSG00000205155	protein_coding	PSENEN	2.56363	0.0316652
ENSG00000100368	ENSG00000100368	protein_coding	CSF2RB	2.55669	0.0293107
ENSG00000172817	ENSG00000172817	protein_coding	CYP7B1	2.55103	0.0110942
ENSG00000165168	ENSG00000165168	protein_coding	CYBB	2.53805	0.00145117
ENSG00000075624	ENSG00000075624	protein_coding	ACTB	2.53705	0.000462477
ENSG00000186469	ENSG00000186469	protein_coding	GNG2	2.53189	0.0339181
ENSG00000110777	ENSG00000110777	protein_coding	POU2AF1	2.51291	0.0329992
ENSG00000161642	ENSG00000161642	protein_coding	ZNF385A	2.50569	0.00835058
ENSG00000140563	ENSG00000140563	protein_coding	MCTP2	2.48919	0.0252224
ENSG00000145920	ENSG00000145920	protein_coding	CPLX2	2.48706	0.0328408
ENSG00000110934	ENSG00000110934	protein_coding	BIN2	2.4854	0.00317143
ENSG00000196954	ENSG00000196954	protein_coding	CASP4	2.4608	0.0180886
ENSG00000179902	ENSG00000179902	protein_coding	C1orf194	2.44451	0.000224497
ENSG00000038210	ENSG00000038210	protein_coding	PI4K2B	2.44432	0.0142258
ENSG00000135090	ENSG00000135090	protein_coding	TAOK3	2.43535	0.00141902
ENSG00000108556	ENSG00000108556	protein_coding	CHRNE	2.43252	0.0218185
ENSG00000163162	ENSG00000163162	protein_coding	RNF149	2.42935	0.0348312
ENSG00000171557	ENSG00000171557	protein_coding	FGG	2.42828	0.0388618
ENSG00000166340	ENSG00000166340	protein_coding	TPP1	2.41994	0.0404054
ENSG00000090372	ENSG00000090372	protein_coding	STRN4	2.41564	0.0396552
ENSG00000172236	ENSG00000172236	protein_coding	TPSAB1	2.40145	0.0316401
ENSG00000101425	ENSG00000101425	protein_coding	BPI	2.40101	0.0119665
ENSG00000198160	ENSG00000198160	protein_coding	MIER1	2.39372	0.0192784
ENSG00000132530	ENSG00000132530	protein_coding	XAF1	2.392	0.0181277
ENSG00000140030	ENSG00000140030	protein_coding	GPR65	2.38972	0.00741239
ENSG00000130755	ENSG00000130755	protein_coding	GMFG	2.38898	0.00177637
ENSG00000165376	ENSG00000165376	protein_coding	CLDN2	2.38429	0.000777637
ENSG00000112799	ENSG00000112799	protein_coding	LY86	2.38063	0.012448
ENSG00000090238	ENSG00000090238	protein_coding	YPEL3	2.35845	0.0163352
ENSG00000126264	ENSG00000126264	protein_coding	HCST	2.3552	0.0287919
ENSG00000100365	ENSG00000100365	protein_coding	NCF4	2.35396	0.0167026
ENSG00000015479	ENSG00000015479	protein_coding	MATR3	2.34646	0.00655688
ENSG00000105639	ENSG00000105639	protein_coding	JAK3	2.32542	0.0282351
ENSG00000100979	ENSG00000100979	protein_coding	PLTP	2.32058	0.0341571
ENSG00000084070	ENSG00000084070	protein_coding	SMAP2	2.32017	0.00613949
ENSG00000186417	ENSG00000186417	protein_coding	GLDN	2.31792	0.012094
ENSG00000108984	ENSG00000108984	protein_coding	MAP2K6	2.31735	0.0158609
ENSG00000133742	ENSG00000133742	protein_coding	CA1	2.29968	0.0028465
ENSG00000137414	ENSG00000137414	protein_coding	FAM8A1	2.29784	0.0232902
ENSG00000093134	ENSG00000093134	protein_coding	VNN3	2.29481	0.00130509
ENSG00000104897	ENSG00000104897	protein_coding	SF3A2	2.28553	0.0164305
ENSG00000213928	ENSG00000213928	protein_coding	IRF9	2.2782	0.0199057
ENSG00000142669	ENSG00000142669	protein_coding	SH3BGRL3	2.27283	0.00821463
ENSG00000103005	ENSG00000103005	protein_coding	USB1	2.25591	0.0178157
ENSG00000106952	ENSG00000106952	protein_coding	TNFSF8	2.25486	0.0201555
ENSG00000197405	ENSG00000197405	protein_coding	C5AR1	2.25415	0.00249441
ENSG00000157399	ENSG00000157399	protein_coding	ARSL	2.24189	0.00273941
ENSG00000185404	ENSG00000185404	protein_coding	SP140L	2.23933	0.0288128
ENSG00000101336	ENSG00000101336	protein_coding	HCK	2.18694	0.00971065
ENSG00000073331	ENSG00000073331	protein_coding	ALPK1	2.17576	0.0271805
ENSG00000213654	ENSG00000213654	protein_coding	GPSM3	2.16734	0.00673613
ENSG00000141582	ENSG00000141582	protein_coding	CBX4	2.15709	0.0171801
ENSG00000162614	ENSG00000162614	protein_coding	NEXN	2.14962	0.0193818
ENSG00000163508	ENSG00000163508	protein_coding	EOMES	2.14724	0.0287151
ENSG00000019582	ENSG00000019582	protein_coding	CD74	2.14696	0.000546476
ENSG00000182117	ENSG00000182117	protein_coding	NOP10	2.10954	0.0442664
ENSG00000123144	ENSG00000123144	protein_coding	TRIR	2.09532	0.000260178
ENSG00000172757	ENSG00000172757	protein_coding	CFL1	2.04945	0.000249071
ENSG00000073737	ENSG00000073737	protein_coding	DHRS9	2.04911	0.00137925
ENSG00000123609	ENSG00000123609	protein_coding	NMI	2.0272	0.0307612
ENSG00000106829	ENSG00000106829	protein_coding	TLE4	2.02656	0.00847418
ENSG00000271605	ENSG00000271605	protein_coding	MILR1	2.0239	0.00135162
ENSG00000167996	ENSG00000167996	protein_coding	FTH1	2.02166	0.000289537
ENSG00000174628	ENSG00000174628	protein_coding	IQCK	2.01023	0.00130298
ENSG00000183386	ENSG00000183386	protein_coding	FHL3	2.00509	0.00905355
ENSG00000139679	ENSG00000139679	protein_coding	LPAR6	2.00072	0.00244082
ENSG00000160932	ENSG00000160932	protein_coding	LY6E	1.98256	0.00461012
ENSG00000166927	ENSG00000166927	protein_coding	MS4A7	1.97075	0.00643147
ENSG00000164096	ENSG00000164096	protein_coding	C4orf3	1.94829	0.0462326
ENSG00000100596	ENSG00000100596	protein_coding	SPTLC2	1.94246	0.000935884
ENSG00000100196	ENSG00000100196	protein_coding	KDELR3	1.93628	0.0375976
ENSG00000188906	ENSG00000188906	protein_coding	LRRK2	1.93261	0.0237146
ENSG00000120509	ENSG00000120509	protein_coding	PDZD11	1.91328	0.00894278
ENSG00000143368	ENSG00000143368	protein_coding	SF3B4	1.90779	0.0482901
ENSG00000131467	ENSG00000131467	protein_coding	PSME3	1.89892	0.0428406
ENSG00000173369	ENSG00000173369	protein_coding	C1QB	1.88777	0.0169886
ENSG00000108518	ENSG00000108518	protein_coding	PFN1	1.88742	0.0389267
ENSG00000003249	ENSG00000003249	protein_coding	DBNDD1	1.88571	0.00279378
ENSG00000112245	ENSG00000112245	protein_coding	PTP4A1	1.8729	0.0299956
ENSG00000104472	ENSG00000104472	protein_coding	CHRAC1	1.85894	0.00368896
ENSG00000115935	ENSG00000115935	protein_coding	WIPF1	1.85043	0.0137138
ENSG00000137628	ENSG00000137628	protein_coding	DDX60	1.84604	0.0162056
ENSG00000187908	ENSG00000187908	protein_coding	DMBT1	1.8437	0.015383
ENSG00000156265	ENSG00000156265	protein_coding	MAP3K7CL	1.84136	0.00141284
ENSG00000216490	ENSG00000216490	protein_coding	IFI30	1.83717	0.000373117
ENSG00000102007	ENSG00000102007	protein_coding	PLP2	1.82836	0.0248897
ENSG00000052802	ENSG00000052802	protein_coding	MSMO1	1.81048	0.0275072
ENSG00000140350	ENSG00000140350	protein_coding	ANP32A	1.79192	0.00439404
ENSG00000160211	ENSG00000160211	protein_coding	G6PD	1.79103	0.0145948
ENSG00000215182	ENSG00000215182	protein_coding	MUC5AC	1.76273	0.0120764
ENSG00000203710	ENSG00000203710	protein_coding	CR1	1.76014	0.000710768
ENSG00000163106	ENSG00000163106	protein_coding	HPGDS	1.75824	0.0237214
ENSG00000104213	ENSG00000104213	protein_coding	PDGFRL	1.75532	0.0291297
ENSG00000257335	ENSG00000257335	protein_coding	MGAM	1.74971	0.0132933
ENSG00000049089	ENSG00000049089	protein_coding	COL9A2	1.73501	0.0421628
ENSG00000116701	ENSG00000116701	protein_coding	NCF2	1.73487	0.0177588
ENSG00000139132	ENSG00000139132	protein_coding	FGD4	1.72975	0.0458638
ENSG00000189067	ENSG00000189067	protein_coding	LITAF	1.72957	0.00254804
ENSG00000115607	ENSG00000115607	protein_coding	IL18RAP	1.72741	0.0104938
ENSG00000196636	ENSG00000196636	protein_coding	SDHAF3	1.72142	0.0222718
ENSG00000106565	ENSG00000106565	protein_coding	TMEM176B	1.71894	0.0250971
ENSG00000112053	ENSG00000112053	protein_coding	SLC26A8	1.69678	0.00111069
ENSG00000114784	ENSG00000114784	protein_coding	EIF1B	1.69671	0.0424078
ENSG00000167720	ENSG00000167720	protein_coding	SRR	1.68697	0.000709247
ENSG00000134330	ENSG00000134330	protein_coding	IAH1	1.68661	0.00642277
ENSG00000140464	ENSG00000140464	protein_coding	PML	1.68109	0.003556
ENSG00000170581	ENSG00000170581	protein_coding	STAT2	1.67491	0.0320138
ENSG00000064763	ENSG00000064763	protein_coding	FAR2	1.66371	0.000869439
ENSG00000189362	ENSG00000189362	protein_coding	NEMP2	1.65816	0.0332575
ENSG00000110492	ENSG00000110492	protein_coding	MDK	1.65199	0.0431764
ENSG00000253276	ENSG00000253276	protein_coding	CCDC71L	1.63589	0.00205677
ENSG00000105479	ENSG00000105479	protein_coding	CCDC114	1.63246	0.0161925
ENSG00000175334	ENSG00000175334	protein_coding	BANF1	1.62419	0.00721012
ENSG00000203747	ENSG00000203747	protein_coding	FCGR3A	1.62193	0.0010893
ENSG00000141837	ENSG00000141837	protein_coding	CACNA1A	1.62135	0.00175733
ENSG00000185236	ENSG00000185236	protein_coding	RAB11B	1.58491	0.00522169
ENSG00000150594	ENSG00000150594	protein_coding	ADRA2A	1.5634	0.0408771
ENSG00000127311	ENSG00000127311	protein_coding	HELB	1.54507	0.00427076
ENSG00000185883	ENSG00000185883	protein_coding	ATP6V0C	1.54475	0.0301861
ENSG00000125753	ENSG00000125753	protein_coding	VASP	1.54265	0.0151771
ENSG00000137312	ENSG00000137312	protein_coding	FLOT1	1.52375	0.00290296
ENSG00000188817	ENSG00000188817	protein_coding	SNTN	1.52043	0.00533249
ENSG00000175489	ENSG00000175489	protein_coding	LRRC25	1.50354	0.0386461
ENSG00000232119	ENSG00000232119	protein_coding	MCTS1	1.4965	0.00819319
ENSG00000205352	ENSG00000205352	protein_coding	PRR13	1.48362	0.00422821
ENSG00000105723	ENSG00000105723	protein_coding	GSK3A	1.48266	0.0130597
ENSG00000133318	ENSG00000133318	protein_coding	RTN3	1.48213	0.0494964
ENSG00000088832	ENSG00000088832	protein_coding	FKBP1A	1.47953	0.017384
ENSG00000180353	ENSG00000180353	protein_coding	HCLS1	1.46442	0.00132228
ENSG00000235173	ENSG00000235173	protein_coding	HGH1	1.45883	0.0333396
ENSG00000196358	ENSG00000196358	protein_coding	NTNG2	1.44739	0.0225772
ENSG00000170296	ENSG00000170296	protein_coding	GABARAP	1.44572	0.00293801
ENSG00000174483	ENSG00000174483	protein_coding	BBS1	1.43847	0.035827
ENSG00000170043	ENSG00000170043	protein_coding	TRAPPC1	1.43227	0.0315013
ENSG00000164038	ENSG00000164038	protein_coding	SLC9B2	1.42811	0.00713779
ENSG00000168769	ENSG00000168769	protein_coding	TET2	1.40963	0.019582
ENSG00000109861	ENSG00000109861	protein_coding	CTSC	1.40853	0.0359782
ENSG00000198502	ENSG00000198502	protein_coding	HLA-DRB5	1.40692	0.0145293
ENSG00000188483	ENSG00000188483	protein_coding	IER5L	1.40517	0.0419601
ENSG00000160345	ENSG00000160345	protein_coding	C9orf116	1.40273	0.0199259
ENSG00000105402	ENSG00000105402	protein_coding	NAPA	1.3983	0.00409679
ENSG00000102897	ENSG00000102897	protein_coding	LYRM1	1.39716	0.0166864
ENSG00000124357	ENSG00000124357	protein_coding	NAGK	1.39545	0.00734631
ENSG00000179909	ENSG00000179909	protein_coding	ZNF154	1.39466	0.00641836
ENSG00000146409	ENSG00000146409	protein_coding	SLC18B1	1.37522	0.0012078
ENSG00000182326	ENSG00000182326	protein_coding	C1S	1.37343	0.00283182
ENSG00000108821	ENSG00000108821	protein_coding	COL1A1	1.3723	0.0131261
ENSG00000162736	ENSG00000162736	protein_coding	NCSTN	1.36235	0.00629887
ENSG00000196369	ENSG00000196369	protein_coding	SRGAP2B	1.35801	0.038077
ENSG00000108679	ENSG00000108679	protein_coding	LGALS3BP	1.35206	0.0140061
ENSG00000213563	ENSG00000213563	protein_coding	C8orf82	1.33984	0.00929386
ENSG00000107798	ENSG00000107798	protein_coding	LIPA	1.33471	0.0264395
ENSG00000108523	ENSG00000108523	protein_coding	RNF167	1.33285	0.0132799
ENSG00000179820	ENSG00000179820	protein_coding	MYADM	1.33228	0.0102529
ENSG00000182287	ENSG00000182287	protein_coding	AP1S2	1.32938	0.0109884
ENSG00000168878	ENSG00000168878	protein_coding	SFTPB	1.32045	0.0160897
ENSG00000235162	ENSG00000235162	protein_coding	C12orf75	1.31704	0.0251683
ENSG00000126861	ENSG00000126861	protein_coding	OMG	1.31636	0.0185683
ENSG00000008441	ENSG00000008441	protein_coding	NFIX	1.31321	0.0282883
ENSG00000133574	ENSG00000133574	protein_coding	GIMAP4	1.31149	0.00091594
ENSG00000130635	ENSG00000130635	protein_coding	COL5A1	1.30843	0.00708592
ENSG00000198858	ENSG00000198858	protein_coding	R3HDM4	1.3011	0.049562
ENSG00000102572	ENSG00000102572	protein_coding	STK24	1.2953	0.0246307
ENSG00000168404	ENSG00000168404	protein_coding	MLKL	1.2938	0.0433002
ENSG00000112210	ENSG00000112210	protein_coding	RAB23	1.29042	0.0442556
ENSG00000134057	ENSG00000134057	protein_coding	CCNB1	1.28954	0.0287814
ENSG00000133169	ENSG00000133169	protein_coding	BEX1	1.26477	0.00397856
ENSG00000126107	ENSG00000126107	protein_coding	HECTD3	1.25681	0.00866986
ENSG00000058799	ENSG00000058799	protein_coding	YIPF1	1.24762	0.0443747
ENSG00000141510	ENSG00000141510	protein_coding	TP53	1.24291	0.026062
ENSG00000197818	ENSG00000197818	protein_coding	SLC9A8	1.24251	0.00651763
ENSG00000090376	ENSG00000090376	protein_coding	IRAK3	1.23554	0.00242973
ENSG00000183283	ENSG00000183283	protein_coding	DAZAP2	1.22605	0.00725704
ENSG00000167600	ENSG00000167600	protein_coding	CYP2S1	1.21738	0.0123026
ENSG00000197872	ENSG00000197872	protein_coding	FAM49A	1.21449	0.0283752
ENSG00000167460	ENSG00000167460	protein_coding	TPM4	1.21447	0.0197783
ENSG00000140297	ENSG00000140297	protein_coding	GCNT3	1.21171	0.0479629
ENSG00000197629	ENSG00000197629	protein_coding	MPEG1	1.2111	0.0220746
ENSG00000131238	ENSG00000131238	protein_coding	PPT1	1.19515	0.0114424
ENSG00000077549	ENSG00000077549	protein_coding	CAPZB	1.18626	0.00496149
ENSG00000172936	ENSG00000172936	protein_coding	MYD88	1.17345	0.0207085
ENSG00000188266	ENSG00000188266	protein_coding	HYKK	1.17298	0.0283775
ENSG00000129226	ENSG00000129226	protein_coding	CD68	1.16864	0.0385429
ENSG00000122852	ENSG00000122852	protein_coding	SFTPA1	1.16543	0.0471844
ENSG00000090382	ENSG00000090382	protein_coding	LYZ	1.15038	0.0190479
ENSG00000143344	ENSG00000143344	protein_coding	RGL1	1.12694	0.00252957
ENSG00000100350	ENSG00000100350	protein_coding	FOXRED2	1.12276	0.0274141
ENSG00000166228	ENSG00000166228	protein_coding	PCBD1	1.11941	0.0067273
ENSG00000165030	ENSG00000165030	protein_coding	NFIL3	1.11675	0.0148684
ENSG00000176597	ENSG00000176597	protein_coding	B3GNT5	1.10915	0.0230116
ENSG00000166002	ENSG00000166002	protein_coding	SMCO4	1.10632	0.0149665
ENSG00000074211	ENSG00000074211	protein_coding	PPP2R2C	1.0991	0.0187053
ENSG00000125354	ENSG00000125354	protein_coding	SEPTIN6	1.09464	0.0428217
ENSG00000105323	ENSG00000105323	protein_coding	HNRNPUL1	1.09187	0.00359347
ENSG00000087460	ENSG00000087460	protein_coding	GNAS	1.05533	0.0177754
ENSG00000173065	ENSG00000173065	protein_coding	FAM222B	1.04577	0.0233746
ENSG00000111679	ENSG00000111679	protein_coding	PTPN6	1.02163	0.0434631
ENSG00000233024	ENSG00000233024	protein_coding	NPIPA9	1.01863	0.0304256
ENSG00000165801	ENSG00000165801	protein_coding	ARHGEF40	-1.00016	0.00597902
ENSG00000143590	ENSG00000143590	protein_coding	EFNA3	-1.00311	0.0150028
ENSG00000137502	ENSG00000137502	protein_coding	RAB30	-1.00434	0.00669671
ENSG00000221874	ENSG00000221874	protein_coding	ZNF816-ZNF321P	-1.00538	0.00186217
ENSG00000160062	ENSG00000160062	protein_coding	ZBTB8A	-1.00542	0.0303786
ENSG00000135407	ENSG00000135407	protein_coding	AVIL	-1.00585	0.0275527
ENSG00000165572	ENSG00000165572	protein_coding	KBTBD6	-1.00633	0.00421271
ENSG00000142784	ENSG00000142784	protein_coding	WDTC1	-1.00651	0.00300861
ENSG00000163617	ENSG00000163617	protein_coding	CCDC191	-1.00663	0.0048158
ENSG00000244486	ENSG00000244486	protein_coding	SCARF2	-1.00688	0.0286661
ENSG00000139737	ENSG00000139737	protein_coding	SLAIN1	-1.00804	0.0147643
ENSG00000049769	ENSG00000049769	protein_coding	PPP1R3F	-1.00823	0.00252095
ENSG00000144935	ENSG00000144935	protein_coding	TRPC1	-1.00841	0.040281
ENSG00000185090	ENSG00000185090	protein_coding	MANEAL	-1.00846	0.0014505
ENSG00000188566	ENSG00000188566	protein_coding	NDOR1	-1.00935	0.00734481
ENSG00000196388	ENSG00000196388	protein_coding	INCA1	-1.00968	0.0293491
ENSG00000204227	ENSG00000204227	protein_coding	RING1	-1.01085	0.0101291
ENSG00000179454	ENSG00000179454	protein_coding	KLHL28	-1.01119	0.0190376
ENSG00000196689	ENSG00000196689	protein_coding	TRPV1	-1.01189	0.00530135
ENSG00000102243	ENSG00000102243	protein_coding	VGLL1	-1.01226	0.0447108
ENSG00000151503	ENSG00000151503	protein_coding	NCAPD3	-1.01263	0.0285171
ENSG00000085741	ENSG00000085741	protein_coding	WNT11	-1.01448	0.0140111
ENSG00000198707	ENSG00000198707	protein_coding	CEP290	-1.01578	0.00141126
ENSG00000131089	ENSG00000131089	protein_coding	ARHGEF9	-1.01661	0.0405747
ENSG00000258839	ENSG00000258839	protein_coding	MC1R	-1.01679	0.00707882
ENSG00000184451	ENSG00000184451	protein_coding	CCR10	-1.01701	0.00401403
ENSG00000100033	ENSG00000100033	protein_coding	PRODH	-1.01742	0.0133038
ENSG00000055211	ENSG00000055211	protein_coding	GINM1	-1.0176	0.0339302
ENSG00000206561	ENSG00000206561	protein_coding	COLQ	-1.01815	0.00594466
ENSG00000177595	ENSG00000177595	protein_coding	PIDD1	-1.01915	0.00244019
ENSG00000154945	ENSG00000154945	protein_coding	ANKRD40	-1.01921	0.012039
ENSG00000179314	ENSG00000179314	protein_coding	WSCD1	-1.01973	0.0225699
ENSG00000155592	ENSG00000155592	protein_coding	ZKSCAN2	-1.02044	0.0450507
ENSG00000169860	ENSG00000169860	protein_coding	P2RY1	-1.02054	0.0128552
ENSG00000232653	ENSG00000232653	protein_coding	GOLGA8N	-1.02107	0.00845928
ENSG00000079482	ENSG00000079482	protein_coding	OPHN1	-1.02162	0.00468048
ENSG00000167523	ENSG00000167523	protein_coding	SPATA33	-1.02237	0.0290074
ENSG00000158352	ENSG00000158352	protein_coding	SHROOM4	-1.02383	0.00521538
ENSG00000198513	ENSG00000198513	protein_coding	ATL1	-1.02424	0.00957495
ENSG00000278129	ENSG00000278129	protein_coding	ZNF8	-1.02424	0.0166655
ENSG00000171827	ENSG00000171827	protein_coding	ZNF570	-1.02647	0.00240698
ENSG00000111664	ENSG00000111664	protein_coding	GNB3	-1.02664	0.0101037
ENSG00000162981	ENSG00000162981	protein_coding	LRATD1	-1.02746	0.00755483
ENSG00000171517	ENSG00000171517	protein_coding	LPAR3	-1.02748	0.00135038
ENSG00000011304	ENSG00000011304	protein_coding	PTBP1	-1.02782	0.035565
ENSG00000168661	ENSG00000168661	protein_coding	ZNF30	-1.03086	0.00599034
ENSG00000113966	ENSG00000113966	protein_coding	ARL6	-1.0315	0.00635221
ENSG00000171311	ENSG00000171311	protein_coding	EXOSC1	-1.03297	0.0448196
ENSG00000204323	ENSG00000204323	protein_coding	SMIM5	-1.03326	0.00913997
ENSG00000043143	ENSG00000043143	protein_coding	JADE2	-1.03401	0.0209092
ENSG00000175711	ENSG00000175711	protein_coding	B3GNTL1	-1.03479	0.00490693
ENSG00000185875	ENSG00000185875	protein_coding	THNSL1	-1.03502	0.0121024
ENSG00000268643	ENSG00000268643	protein_coding	AC006486.1	-1.0353	0.0262183
ENSG00000108306	ENSG00000108306	protein_coding	FBXL20	-1.0356	0.0148855
ENSG00000118369	ENSG00000118369	protein_coding	USP35	-1.03631	0.00604622
ENSG00000102119	ENSG00000102119	protein_coding	EMD	-1.03638	0.0486883
ENSG00000170367	ENSG00000170367	protein_coding	CST5	-1.03676	0.0181076
ENSG00000183741	ENSG00000183741	protein_coding	CBX6	-1.03735	0.0324753
ENSG00000181392	ENSG00000181392	protein_coding	SYNE4	-1.0378	0.0272318
ENSG00000181722	ENSG00000181722	protein_coding	ZBTB20	-1.03822	0.00421365
ENSG00000176563	ENSG00000176563	protein_coding	CNTD1	-1.03853	0.00165722
ENSG00000124762	ENSG00000124762	protein_coding	CDKN1A	-1.03906	0.0308546
ENSG00000158710	ENSG00000158710	protein_coding	TAGLN2	-1.04005	0.0481401
ENSG00000188060	ENSG00000188060	protein_coding	RAB42	-1.04008	0.0362012
ENSG00000128872	ENSG00000128872	protein_coding	TMOD2	-1.04009	0.0444222
ENSG00000242110	ENSG00000242110	protein_coding	AMACR	-1.0404	0.00342479
ENSG00000100312	ENSG00000100312	protein_coding	ACR	-1.04045	0.0124005
ENSG00000146143	ENSG00000146143	protein_coding	PRIM2	-1.04192	0.00592716
ENSG00000159214	ENSG00000159214	protein_coding	CCDC24	-1.0422	0.0055745
ENSG00000246922	ENSG00000246922	protein_coding	UBAP1L	-1.0423	0.00169916
ENSG00000100478	ENSG00000100478	protein_coding	AP4S1	-1.04375	0.00132559
ENSG00000182134	ENSG00000182134	protein_coding	TDRKH	-1.04424	0.0281501
ENSG00000109881	ENSG00000109881	protein_coding	CCDC34	-1.0449	0.0389182
ENSG00000166676	ENSG00000166676	protein_coding	TVP23A	-1.04537	0.0422139
ENSG00000101850	ENSG00000101850	protein_coding	GPR143	-1.04537	0.0379516
ENSG00000105137	ENSG00000105137	protein_coding	SYDE1	-1.04618	0.0080461
ENSG00000150455	ENSG00000150455	protein_coding	TIRAP	-1.04624	0.014255
ENSG00000148082	ENSG00000148082	protein_coding	SHC3	-1.04627	0.00794702
ENSG00000177853	ENSG00000177853	protein_coding	ZNF518A	-1.0474	0.00150824
ENSG00000164484	ENSG00000164484	protein_coding	TMEM200A	-1.04819	0.00146786
ENSG00000080854	ENSG00000080854	protein_coding	IGSF9B	-1.04819	0.00724263
ENSG00000155016	ENSG00000155016	protein_coding	CYP2U1	-1.0489	0.0432776
ENSG00000196912	ENSG00000196912	protein_coding	ANKRD36B	-1.0492	0.00336931
ENSG00000100568	ENSG00000100568	protein_coding	VTI1B	-1.04926	0.0120445
ENSG00000089009	ENSG00000089009	protein_coding	RPL6	-1.05011	0.0401748
ENSG00000164221	ENSG00000164221	protein_coding	CCDC112	-1.05012	0.031187
ENSG00000055070	ENSG00000055070	protein_coding	SZRD1	-1.05077	0.0378154
ENSG00000116819	ENSG00000116819	protein_coding	TFAP2E	-1.05085	0.00486981
ENSG00000099840	ENSG00000099840	protein_coding	IZUMO4	-1.05178	0.018506
ENSG00000241685	ENSG00000241685	protein_coding	ARPC1A	-1.05301	0.00748396
ENSG00000151967	ENSG00000151967	protein_coding	SCHIP1	-1.05392	0.00529145
ENSG00000011347	ENSG00000011347	protein_coding	SYT7	-1.05406	0.0274473
ENSG00000052126	ENSG00000052126	protein_coding	PLEKHA5	-1.05458	0.00182321
ENSG00000176371	ENSG00000176371	protein_coding	ZSCAN2	-1.05544	0.00198785
ENSG00000105640	ENSG00000105640	protein_coding	RPL18A	-1.05553	0.0479735
ENSG00000112182	ENSG00000112182	protein_coding	BACH2	-1.05593	0.0126976
ENSG00000115827	ENSG00000115827	protein_coding	DCAF17	-1.05636	0.0122097
ENSG00000137098	ENSG00000137098	protein_coding	SPAG8	-1.05806	0.0050386
ENSG00000186710	ENSG00000186710	protein_coding	CFAP73	-1.05809	0.0019656
ENSG00000128594	ENSG00000128594	protein_coding	LRRC4	-1.05847	0.0242277
ENSG00000168092	ENSG00000168092	protein_coding	PAFAH1B2	-1.06047	0.0142487
ENSG00000140943	ENSG00000140943	protein_coding	MBTPS1	-1.06081	0.00548075
ENSG00000163633	ENSG00000163633	protein_coding	C4orf36	-1.06094	0.00186043
ENSG00000151746	ENSG00000151746	protein_coding	BICD1	-1.0612	0.00151146
ENSG00000177084	ENSG00000177084	protein_coding	POLE	-1.06249	0.00136672
ENSG00000066455	ENSG00000066455	protein_coding	GOLGA5	-1.06276	0.0460097
ENSG00000215187	ENSG00000215187	protein_coding	FAM166B	-1.06311	0.00837562
ENSG00000085831	ENSG00000085831	protein_coding	TTC39A	-1.0634	0.00422298
ENSG00000197496	ENSG00000197496	protein_coding	SLC2A10	-1.06535	0.00227793
ENSG00000115112	ENSG00000115112	protein_coding	TFCP2L1	-1.06539	0.0402716
ENSG00000102893	ENSG00000102893	protein_coding	PHKB	-1.0661	0.00176057
ENSG00000104524	ENSG00000104524	protein_coding	PYCR3	-1.06621	0.00125777
ENSG00000171357	ENSG00000171357	protein_coding	LURAP1	-1.0694	0.0403593
ENSG00000197694	ENSG00000197694	protein_coding	SPTAN1	-1.06965	0.0378925
ENSG00000135740	ENSG00000135740	protein_coding	SLC9A5	-1.06975	0.0207538
ENSG00000244219	ENSG00000244219	protein_coding	TMEM225B	-1.07038	0.0145366
ENSG00000184465	ENSG00000184465	protein_coding	WDR27	-1.07157	0.0185599
ENSG00000136104	ENSG00000136104	protein_coding	RNASEH2B	-1.07305	0.00647419
ENSG00000158545	ENSG00000158545	protein_coding	ZC3H18	-1.07575	0.035934
ENSG00000165338	ENSG00000165338	protein_coding	HECTD2	-1.07582	0.00845394
ENSG00000189221	ENSG00000189221	protein_coding	MAOA	-1.07585	0.0128094
ENSG00000239887	ENSG00000239887	protein_coding	C1orf226	-1.076	0.00338947
ENSG00000155622	ENSG00000155622	protein_coding	XAGE2	-1.07631	0.0064698
ENSG00000271793	ENSG00000271793	protein_coding	AL589666.1	-1.07725	0.0407454
ENSG00000115641	ENSG00000115641	protein_coding	FHL2	-1.07778	0.0171114
ENSG00000167414	ENSG00000167414	protein_coding	GNG8	-1.07865	0.00182312
ENSG00000136379	ENSG00000136379	protein_coding	ABHD17C	-1.07972	0.0188529
ENSG00000129654	ENSG00000129654	protein_coding	FOXJ1	-1.08003	0.0206546
ENSG00000115685	ENSG00000115685	protein_coding	PPP1R7	-1.08004	0.00178133
ENSG00000164808	ENSG00000164808	protein_coding	SPIDR	-1.08008	0.0161737
ENSG00000243660	ENSG00000243660	protein_coding	ZNF487	-1.08044	0.0020001
ENSG00000166575	ENSG00000166575	protein_coding	TMEM135	-1.08104	0.00992733
ENSG00000111490	ENSG00000111490	protein_coding	TBC1D30	-1.08128	0.0466687
ENSG00000169683	ENSG00000169683	protein_coding	LRRC45	-1.08148	0.0168662
ENSG00000220201	ENSG00000220201	protein_coding	ZGLP1	-1.084	0.00800479
ENSG00000171045	ENSG00000171045	protein_coding	TSNARE1	-1.08468	0.0076594
ENSG00000090857	ENSG00000090857	protein_coding	PDPR	-1.08513	0.0231985
ENSG00000162129	ENSG00000162129	protein_coding	CLPB	-1.08692	0.0433479
ENSG00000196911	ENSG00000196911	protein_coding	KPNA5	-1.08697	0.0117269
ENSG00000174748	ENSG00000174748	protein_coding	RPL15	-1.08708	0.0247028
ENSG00000106460	ENSG00000106460	protein_coding	TMEM106B	-1.08719	0.0161456
ENSG00000181873	ENSG00000181873	protein_coding	IBA57	-1.08719	0.00130829
ENSG00000117620	ENSG00000117620	protein_coding	SLC35A3	-1.08776	0.00260822
ENSG00000118922	ENSG00000118922	protein_coding	KLF12	-1.08789	0.00690631
ENSG00000168734	ENSG00000168734	protein_coding	PKIG	-1.088	0.0262117
ENSG00000160613	ENSG00000160613	protein_coding	PCSK7	-1.08812	0.0145288
ENSG00000139187	ENSG00000139187	protein_coding	KLRG1	-1.08825	0.0429709
ENSG00000124374	ENSG00000124374	protein_coding	PAIP2B	-1.08846	0.0309559
ENSG00000090316	ENSG00000090316	protein_coding	MAEA	-1.0909	0.0470016
ENSG00000130724	ENSG00000130724	protein_coding	CHMP2A	-1.09096	0.0149642
ENSG00000187535	ENSG00000187535	protein_coding	IFT140	-1.0916	0.0437481
ENSG00000175764	ENSG00000175764	protein_coding	TTLL11	-1.0918	0.0355503
ENSG00000114200	ENSG00000114200	protein_coding	BCHE	-1.09282	0.0200326
ENSG00000275835	ENSG00000275835	protein_coding	TUBGCP5	-1.09336	0.0414557
ENSG00000181938	ENSG00000181938	protein_coding	GINS3	-1.09429	0.0226814
ENSG00000174206	ENSG00000174206	protein_coding	C12orf66	-1.09511	0.00166709
ENSG00000163931	ENSG00000163931	protein_coding	TKT	-1.09539	0.047185
ENSG00000173480	ENSG00000173480	protein_coding	ZNF417	-1.09705	0.0311649
ENSG00000186198	ENSG00000186198	protein_coding	SLC51B	-1.09948	0.0436658
ENSG00000166188	ENSG00000166188	protein_coding	ZNF319	-1.10072	0.00999424
ENSG00000155961	ENSG00000155961	protein_coding	RAB39B	-1.1012	0.0248892
ENSG00000135605	ENSG00000135605	protein_coding	TEC	-1.10138	0.0037587
ENSG00000196705	ENSG00000196705	protein_coding	ZNF431	-1.10171	0.0482123
ENSG00000105968	ENSG00000105968	protein_coding	H2AZ2	-1.10296	0.0336301
ENSG00000127540	ENSG00000127540	protein_coding	UQCR11	-1.10531	0.0264783
ENSG00000164291	ENSG00000164291	protein_coding	ARSK	-1.10624	0.00195626
ENSG00000175087	ENSG00000175087	protein_coding	PDIK1L	-1.10699	0.021489
ENSG00000162755	ENSG00000162755	protein_coding	KLHDC9	-1.10748	0.0152331
ENSG00000133114	ENSG00000133114	protein_coding	GPALPP1	-1.10932	0.00803704
ENSG00000160439	ENSG00000160439	protein_coding	RDH13	-1.11011	0.00287916
ENSG00000143971	ENSG00000143971	protein_coding	ETAA1	-1.11089	0.00118865
ENSG00000234719	ENSG00000234719	protein_coding	NPIPB2	-1.11197	0.0203884
ENSG00000076351	ENSG00000076351	protein_coding	SLC46A1	-1.1124	0.00967373
ENSG00000114841	ENSG00000114841	protein_coding	DNAH1	-1.11425	0.00200947
ENSG00000188283	ENSG00000188283	protein_coding	ZNF383	-1.11447	0.00108287
ENSG00000173581	ENSG00000173581	protein_coding	CCDC106	-1.11461	0.0213961
ENSG00000261857	ENSG00000261857	protein_coding	MIA	-1.11505	0.00356898
ENSG00000105429	ENSG00000105429	protein_coding	MEGF8	-1.11577	0.0257457
ENSG00000197380	ENSG00000197380	protein_coding	DACT3	-1.11707	0.0257786
ENSG00000135299	ENSG00000135299	protein_coding	ANKRD6	-1.11768	0.00121706
ENSG00000177613	ENSG00000177613	protein_coding	CSTF2T	-1.11861	0.00913031
ENSG00000169515	ENSG00000169515	protein_coding	CCDC8	-1.11877	0.00714045
ENSG00000260428	ENSG00000260428	protein_coding	SCX	-1.119	0.0148568
ENSG00000258674	ENSG00000258674	protein_coding	AC011448.1	-1.11976	0.00132546
ENSG00000111271	ENSG00000111271	protein_coding	ACAD10	-1.12044	0.00110171
ENSG00000182983	ENSG00000182983	protein_coding	ZNF662	-1.12052	0.0431482
ENSG00000134955	ENSG00000134955	protein_coding	SLC37A2	-1.12133	0.0150447
ENSG00000106571	ENSG00000106571	protein_coding	GLI3	-1.1214	0.0244341
ENSG00000147912	ENSG00000147912	protein_coding	FBXO10	-1.1218	0.0181705
ENSG00000153789	ENSG00000153789	protein_coding	FAM92B	-1.12223	0.0318768
ENSG00000235098	ENSG00000235098	protein_coding	ANKRD65	-1.12265	0.00244946
ENSG00000158528	ENSG00000158528	protein_coding	PPP1R9A	-1.12323	0.0126745
ENSG00000196440	ENSG00000196440	protein_coding	ARMCX4	-1.12358	0.00469655
ENSG00000021574	ENSG00000021574	protein_coding	SPAST	-1.12415	0.00261392
ENSG00000099889	ENSG00000099889	protein_coding	ARVCF	-1.12447	0.0485438
ENSG00000155463	ENSG00000155463	protein_coding	OXA1L	-1.12471	0.0354438
ENSG00000203727	ENSG00000203727	protein_coding	SAMD5	-1.12479	0.0103791
ENSG00000184845	ENSG00000184845	protein_coding	DRD1	-1.12509	0.00688628
ENSG00000166347	ENSG00000166347	protein_coding	CYB5A	-1.12589	0.00266389
ENSG00000164008	ENSG00000164008	protein_coding	C1orf50	-1.1262	0.0018452
ENSG00000140945	ENSG00000140945	protein_coding	CDH13	-1.1263	0.00442742
ENSG00000111879	ENSG00000111879	protein_coding	FAM184A	-1.12678	0.00966401
ENSG00000134909	ENSG00000134909	protein_coding	ARHGAP32	-1.12741	0.0223463
ENSG00000013503	ENSG00000013503	protein_coding	POLR3B	-1.12803	0.0261991
ENSG00000177169	ENSG00000177169	protein_coding	ULK1	-1.12825	0.0220659
ENSG00000185379	ENSG00000185379	protein_coding	RAD51D	-1.1296	0.00519951
ENSG00000161277	ENSG00000161277	protein_coding	THAP8	-1.13041	0.00335334
ENSG00000283782	ENSG00000283782	protein_coding	AC116366.3	-1.13237	0.00432406
ENSG00000130699	ENSG00000130699	protein_coding	TAF4	-1.13292	0.0223084
ENSG00000176715	ENSG00000176715	protein_coding	ACSF3	-1.13294	0.00179099
ENSG00000221883	ENSG00000221883	protein_coding	ARIH2OS	-1.13357	0.0233362
ENSG00000125843	ENSG00000125843	protein_coding	AP5S1	-1.13491	0.0144394
ENSG00000067182	ENSG00000067182	protein_coding	TNFRSF1A	-1.13619	0.00722415
ENSG00000187815	ENSG00000187815	protein_coding	ZFP69	-1.13649	0.043446
ENSG00000197044	ENSG00000197044	protein_coding	ZNF441	-1.13674	0.0129606
ENSG00000178175	ENSG00000178175	protein_coding	ZNF366	-1.13716	0.0196982
ENSG00000251247	ENSG00000251247	protein_coding	ZNF345	-1.13731	0.00105406
ENSG00000075239	ENSG00000075239	protein_coding	ACAT1	-1.13733	0.0357674
ENSG00000169519	ENSG00000169519	protein_coding	METTL15	-1.13769	0.0011867
ENSG00000213793	ENSG00000213793	protein_coding	ZNF888	-1.13806	0.0406992
ENSG00000185024	ENSG00000185024	protein_coding	BRF1	-1.13841	0.00136785
ENSG00000167685	ENSG00000167685	protein_coding	ZNF444	-1.13961	0.0118119
ENSG00000254685	ENSG00000254685	protein_coding	FPGT	-1.14037	0.0285957
ENSG00000162148	ENSG00000162148	protein_coding	PPP1R32	-1.14128	0.0286236
ENSG00000166432	ENSG00000166432	protein_coding	ZMAT1	-1.14205	0.0233248
ENSG00000137760	ENSG00000137760	protein_coding	ALKBH8	-1.14217	0.00101268
ENSG00000173531	ENSG00000173531	protein_coding	MST1	-1.14224	0.00728913
ENSG00000129194	ENSG00000129194	protein_coding	SOX15	-1.1432	0.00208015
ENSG00000185158	ENSG00000185158	protein_coding	LRRC37B	-1.14339	0.0448251
ENSG00000147166	ENSG00000147166	protein_coding	ITGB1BP2	-1.14353	0.00159881
ENSG00000171115	ENSG00000171115	protein_coding	GIMAP8	-1.14465	0.0160424
ENSG00000182318	ENSG00000182318	protein_coding	ZSCAN22	-1.14492	0.0486697
ENSG00000162650	ENSG00000162650	protein_coding	ATXN7L2	-1.1454	0.0032202
ENSG00000196782	ENSG00000196782	protein_coding	MAML3	-1.14554	0.0251534
ENSG00000198556	ENSG00000198556	protein_coding	ZNF789	-1.14946	0.00135055
ENSG00000109189	ENSG00000109189	protein_coding	USP46	-1.14967	0.00207507
ENSG00000155755	ENSG00000155755	protein_coding	TMEM237	-1.14982	0.00386575
ENSG00000175164	ENSG00000175164	protein_coding	ABO	-1.15059	0.00100591
ENSG00000087589	ENSG00000087589	protein_coding	CASS4	-1.15142	0.0227401
ENSG00000160007	ENSG00000160007	protein_coding	ARHGAP35	-1.15185	0.00222119
ENSG00000069764	ENSG00000069764	protein_coding	PLA2G10	-1.15295	0.00102862
ENSG00000146904	ENSG00000146904	protein_coding	EPHA1	-1.1531	0.0259704
ENSG00000272916	ENSG00000272916	protein_coding	AC022400.7	-1.15448	0.00222675
ENSG00000175183	ENSG00000175183	protein_coding	CSRP2	-1.15552	0.0105617
ENSG00000118308	ENSG00000118308	protein_coding	LRMP	-1.15578	0.00357917
ENSG00000136908	ENSG00000136908	protein_coding	DPM2	-1.15584	0.0380887
ENSG00000177427	ENSG00000177427	protein_coding	MIEF2	-1.15599	0.0080684
ENSG00000171873	ENSG00000171873	protein_coding	ADRA1D	-1.15611	0.00294822
ENSG00000166821	ENSG00000166821	protein_coding	PEX11A	-1.15634	0.001534
ENSG00000081377	ENSG00000081377	protein_coding	CDC14B	-1.15685	0.00214456
ENSG00000182986	ENSG00000182986	protein_coding	ZNF320	-1.15702	0.0014597
ENSG00000175264	ENSG00000175264	protein_coding	CHST1	-1.15753	0.00129371
ENSG00000214827	ENSG00000214827	protein_coding	MTCP1	-1.15781	0.00105112
ENSG00000196418	ENSG00000196418	protein_coding	ZNF124	-1.15879	0.0119378
ENSG00000205710	ENSG00000205710	protein_coding	C17orf107	-1.15907	0.00938493
ENSG00000250644	ENSG00000250644	protein_coding	AC068580.4	-1.1593	0.00198101
ENSG00000206127	ENSG00000206127	protein_coding	GOLGA8O	-1.1604	0.0438509
ENSG00000087495	ENSG00000087495	protein_coding	PHACTR3	-1.16059	0.0142162
ENSG00000118412	ENSG00000118412	protein_coding	CASP8AP2	-1.16063	0.0067416
ENSG00000160145	ENSG00000160145	protein_coding	KALRN	-1.16166	0.0145869
ENSG00000188295	ENSG00000188295	protein_coding	ZNF669	-1.16187	0.0303492
ENSG00000145348	ENSG00000145348	protein_coding	TBCK	-1.16202	0.0137353
ENSG00000164344	ENSG00000164344	protein_coding	KLKB1	-1.16242	0.0317099
ENSG00000145743	ENSG00000145743	protein_coding	FBXL17	-1.16292	0.0348668
ENSG00000144040	ENSG00000144040	protein_coding	SFXN5	-1.16301	0.00893457
ENSG00000157353	ENSG00000157353	protein_coding	FCSK	-1.16305	0.00744989
ENSG00000162927	ENSG00000162927	protein_coding	PUS10	-1.16552	0.00464031
ENSG00000145882	ENSG00000145882	protein_coding	PCYOX1L	-1.16577	0.0118425
ENSG00000139645	ENSG00000139645	protein_coding	ANKRD52	-1.16591	0.0113446
ENSG00000164073	ENSG00000164073	protein_coding	MFSD8	-1.16654	0.0211097
ENSG00000261408	ENSG00000261408	protein_coding	TEN1-CDK3	-1.16728	0.00113219
ENSG00000165533	ENSG00000165533	protein_coding	TTC8	-1.16779	0.00599646
ENSG00000130299	ENSG00000130299	protein_coding	GTPBP3	-1.16968	0.00251632
ENSG00000205593	ENSG00000205593	protein_coding	DENND6B	-1.16988	0.00174118
ENSG00000198520	ENSG00000198520	protein_coding	ARMH1	-1.16992	0.0409294
ENSG00000109654	ENSG00000109654	protein_coding	TRIM2	-1.17039	0.023287
ENSG00000196236	ENSG00000196236	protein_coding	XPNPEP3	-1.17049	0.000950768
ENSG00000137274	ENSG00000137274	protein_coding	BPHL	-1.1721	0.0246977
ENSG00000114473	ENSG00000114473	protein_coding	IQCG	-1.173	0.0100195
ENSG00000149292	ENSG00000149292	protein_coding	TTC12	-1.17316	0.00903214
ENSG00000107485	ENSG00000107485	protein_coding	GATA3	-1.17476	0.0295364
ENSG00000135931	ENSG00000135931	protein_coding	ARMC9	-1.17488	0.0339907
ENSG00000171817	ENSG00000171817	protein_coding	ZNF540	-1.17639	0.0398086
ENSG00000068137	ENSG00000068137	protein_coding	PLEKHH3	-1.17703	0.00685862
ENSG00000160972	ENSG00000160972	protein_coding	PPP1R16A	-1.1781	0.0339447
ENSG00000175707	ENSG00000175707	protein_coding	KDF1	-1.17853	0.0461859
ENSG00000131584	ENSG00000131584	protein_coding	ACAP3	-1.17975	0.0111301
ENSG00000248592	ENSG00000248592	protein_coding	STIMATE-MUSTN1	-1.18025	0.00211917
ENSG00000164294	ENSG00000164294	protein_coding	GPX8	-1.1805	0.00984417
ENSG00000161904	ENSG00000161904	protein_coding	LEMD2	-1.18126	0.0423246
ENSG00000174669	ENSG00000174669	protein_coding	SLC29A2	-1.18162	0.0301352
ENSG00000129048	ENSG00000129048	protein_coding	ACKR4	-1.18266	0.00368613
ENSG00000138606	ENSG00000138606	protein_coding	SHF	-1.18383	0.00193332
ENSG00000196118	ENSG00000196118	protein_coding	CCDC189	-1.18422	0.0169221
ENSG00000079102	ENSG00000079102	protein_coding	RUNX1T1	-1.1857	0.0204948
ENSG00000125618	ENSG00000125618	protein_coding	PAX8	-1.18589	0.000957364
ENSG00000165914	ENSG00000165914	protein_coding	TTC7B	-1.18604	0.00834493
ENSG00000172667	ENSG00000172667	protein_coding	ZMAT3	-1.18604	0.0498422
ENSG00000166402	ENSG00000166402	protein_coding	TUB	-1.18678	0.000920456
ENSG00000274286	ENSG00000274286	protein_coding	ADRA2B	-1.18721	0.0228005
ENSG00000177932	ENSG00000177932	protein_coding	ZNF354C	-1.18726	0.0146743
ENSG00000144649	ENSG00000144649	protein_coding	GASK1A	-1.1873	0.00325607
ENSG00000140950	ENSG00000140950	protein_coding	MEAK7	-1.18791	0.00346448
ENSG00000168970	ENSG00000168970	protein_coding	JMJD7-PLA2G4B	-1.18878	0.0161571
ENSG00000171680	ENSG00000171680	protein_coding	PLEKHG5	-1.19115	0.00285635
ENSG00000153044	ENSG00000153044	protein_coding	CENPH	-1.1913	0.0169835
ENSG00000114026	ENSG00000114026	protein_coding	OGG1	-1.19188	0.0287517
ENSG00000140836	ENSG00000140836	protein_coding	ZFHX3	-1.19208	0.0311119
ENSG00000167555	ENSG00000167555	protein_coding	ZNF528	-1.19321	0.0279081
ENSG00000176771	ENSG00000176771	protein_coding	NCKAP5	-1.19375	0.00345314
ENSG00000183569	ENSG00000183569	protein_coding	SERHL2	-1.19523	0.00442566
ENSG00000160051	ENSG00000160051	protein_coding	IQCC	-1.19572	0.0160861
ENSG00000107551	ENSG00000107551	protein_coding	RASSF4	-1.19604	0.00386089
ENSG00000118242	ENSG00000118242	protein_coding	MREG	-1.19633	0.02888
ENSG00000168781	ENSG00000168781	protein_coding	PPIP5K1	-1.1972	0.00293272
ENSG00000137218	ENSG00000137218	protein_coding	FRS3	-1.19732	0.0095311
ENSG00000142937	ENSG00000142937	protein_coding	RPS8	-1.19736	0.00911122
ENSG00000161653	ENSG00000161653	protein_coding	NAGS	-1.20097	0.0359509
ENSG00000129007	ENSG00000129007	protein_coding	CALML4	-1.20139	0.0153925
ENSG00000155008	ENSG00000155008	protein_coding	APOOL	-1.20242	0.0157412
ENSG00000155666	ENSG00000155666	protein_coding	KDM8	-1.2026	0.00214099
ENSG00000092140	ENSG00000092140	protein_coding	G2E3	-1.20541	0.0356664
ENSG00000130700	ENSG00000130700	protein_coding	GATA5	-1.2056	0.00478616
ENSG00000274070	ENSG00000274070	protein_coding	CASTOR2	-1.20606	0.0359673
ENSG00000198089	ENSG00000198089	protein_coding	SFI1	-1.20712	0.00760953
ENSG00000189043	ENSG00000189043	protein_coding	NDUFA4	-1.208	0.0463378
ENSG00000154429	ENSG00000154429	protein_coding	CCSAP	-1.20921	0.0152117
ENSG00000275111	ENSG00000275111	protein_coding	ZNF2	-1.2098	0.0292752
ENSG00000274252	ENSG00000274252	protein_coding	GGTLC3	-1.21068	0.0120682
ENSG00000157734	ENSG00000157734	protein_coding	SNX22	-1.21107	0.00856223
ENSG00000223496	ENSG00000223496	protein_coding	EXOSC6	-1.21326	0.0446118
ENSG00000170088	ENSG00000170088	protein_coding	TMEM192	-1.21528	0.00622434
ENSG00000169239	ENSG00000169239	protein_coding	CA5B	-1.21764	0.00117518
ENSG00000261652	ENSG00000261652	protein_coding	C15orf65	-1.21785	0.00252577
ENSG00000198799	ENSG00000198799	protein_coding	LRIG2	-1.21885	0.0140745
ENSG00000171291	ENSG00000171291	protein_coding	ZNF439	-1.22066	0.00534414
ENSG00000178026	ENSG00000178026	protein_coding	LRRC75B	-1.22082	0.00315738
ENSG00000171160	ENSG00000171160	protein_coding	MORN4	-1.22129	0.0308289
ENSG00000106692	ENSG00000106692	protein_coding	FKTN	-1.22172	0.0088507
ENSG00000168061	ENSG00000168061	protein_coding	SAC3D1	-1.2221	0.00277902
ENSG00000137073	ENSG00000137073	protein_coding	UBAP2	-1.22279	0.0281767
ENSG00000171451	ENSG00000171451	protein_coding	DSEL	-1.22307	0.00123678
ENSG00000170100	ENSG00000170100	protein_coding	ZNF778	-1.22331	0.0314279
ENSG00000215193	ENSG00000215193	protein_coding	PEX26	-1.22348	0.00105452
ENSG00000206190	ENSG00000206190	protein_coding	ATP10A	-1.22372	0.00234343
ENSG00000177600	ENSG00000177600	protein_coding	RPLP2	-1.22408	0.0116353
ENSG00000198246	ENSG00000198246	protein_coding	SLC29A3	-1.2246	0.00533743
ENSG00000166689	ENSG00000166689	protein_coding	PLEKHA7	-1.22528	0.0142342
ENSG00000066468	ENSG00000066468	protein_coding	FGFR2	-1.22535	0.0251903
ENSG00000284691	ENSG00000284691	protein_coding	AC073111.4	-1.2257	0.00496329
ENSG00000172650	ENSG00000172650	protein_coding	AGAP5	-1.22712	0.0340804
ENSG00000197150	ENSG00000197150	protein_coding	ABCB8	-1.2274	0.00192144
ENSG00000135144	ENSG00000135144	protein_coding	DTX1	-1.22767	0.00401298
ENSG00000196700	ENSG00000196700	protein_coding	ZNF512B	-1.22842	0.0330583
ENSG00000019485	ENSG00000019485	protein_coding	PRDM11	-1.22847	0.00300918
ENSG00000110921	ENSG00000110921	protein_coding	MVK	-1.22955	0.010955
ENSG00000077152	ENSG00000077152	protein_coding	UBE2T	-1.22959	0.00853244
ENSG00000109576	ENSG00000109576	protein_coding	AADAT	-1.23026	0.00152391
ENSG00000048471	ENSG00000048471	protein_coding	SNX29	-1.23062	0.012531
ENSG00000212864	ENSG00000212864	protein_coding	RNF208	-1.23064	0.00124506
ENSG00000167522	ENSG00000167522	protein_coding	ANKRD11	-1.23071	0.0449061
ENSG00000121653	ENSG00000121653	protein_coding	MAPK8IP1	-1.23106	0.000853596
ENSG00000143878	ENSG00000143878	protein_coding	RHOB	-1.23374	0.0233465
ENSG00000175390	ENSG00000175390	protein_coding	EIF3F	-1.23377	0.0172989
ENSG00000205129	ENSG00000205129	protein_coding	C4orf47	-1.23414	0.0440241
ENSG00000185681	ENSG00000185681	protein_coding	MORN5	-1.23559	0.0010826
ENSG00000089163	ENSG00000089163	protein_coding	SIRT4	-1.23606	0.0220064
ENSG00000083844	ENSG00000083844	protein_coding	ZNF264	-1.23663	0.0283345
ENSG00000009307	ENSG00000009307	protein_coding	CSDE1	-1.23706	0.039814
ENSG00000170175	ENSG00000170175	protein_coding	CHRNB1	-1.23836	0.0379781
ENSG00000060656	ENSG00000060656	protein_coding	PTPRU	-1.23893	0.0401143
ENSG00000240694	ENSG00000240694	protein_coding	PNMA2	-1.23919	0.00411501
ENSG00000149564	ENSG00000149564	protein_coding	ESAM	-1.23942	0.00975698
ENSG00000161798	ENSG00000161798	protein_coding	AQP5	-1.23948	0.0182774
ENSG00000174791	ENSG00000174791	protein_coding	RIN1	-1.2395	0.010601
ENSG00000128284	ENSG00000128284	protein_coding	APOL3	-1.23983	0.0459207
ENSG00000124217	ENSG00000124217	protein_coding	MOCS3	-1.24142	0.0182877
ENSG00000034053	ENSG00000034053	protein_coding	APBA2	-1.24187	0.00295992
ENSG00000142208	ENSG00000142208	protein_coding	AKT1	-1.2425	0.00849099
ENSG00000188177	ENSG00000188177	protein_coding	ZC3H6	-1.24424	0.00136802
ENSG00000198198	ENSG00000198198	protein_coding	SZT2	-1.24495	0.0110339
ENSG00000167384	ENSG00000167384	protein_coding	ZNF180	-1.24499	0.000942513
ENSG00000173950	ENSG00000173950	protein_coding	XXYLT1	-1.24543	0.0337929
ENSG00000068078	ENSG00000068078	protein_coding	FGFR3	-1.24646	0.0335648
ENSG00000167562	ENSG00000167562	protein_coding	ZNF701	-1.24662	0.00696227
ENSG00000143947	ENSG00000143947	protein_coding	RPS27A	-1.24666	0.0355027
ENSG00000185669	ENSG00000185669	protein_coding	SNAI3	-1.24666	0.0114766
ENSG00000134253	ENSG00000134253	protein_coding	TRIM45	-1.24783	0.0383258
ENSG00000141956	ENSG00000141956	protein_coding	PRDM15	-1.24933	0.0277456
ENSG00000196993	ENSG00000196993	protein_coding	NPIPB9	-1.25086	0.0168602
ENSG00000143882	ENSG00000143882	protein_coding	ATP6V1C2	-1.25098	0.0457981
ENSG00000127980	ENSG00000127980	protein_coding	PEX1	-1.25123	0.00110918
ENSG00000186687	ENSG00000186687	protein_coding	LYRM7	-1.25135	0.00645132
ENSG00000181284	ENSG00000181284	protein_coding	TMEM102	-1.25155	0.00090702
ENSG00000197406	ENSG00000197406	protein_coding	DIO3	-1.25189	0.0379872
ENSG00000189152	ENSG00000189152	protein_coding	GRAPL	-1.25248	0.0385694
ENSG00000205060	ENSG00000205060	protein_coding	SLC35B4	-1.25481	0.0263166
ENSG00000253304	ENSG00000253304	protein_coding	TMEM200B	-1.25672	0.0366442
ENSG00000145391	ENSG00000145391	protein_coding	SETD7	-1.25677	0.00755876
ENSG00000196235	ENSG00000196235	protein_coding	SUPT5H	-1.25685	0.0186738
ENSG00000197937	ENSG00000197937	protein_coding	ZNF347	-1.25692	0.00537173
ENSG00000283900	ENSG00000283900	protein_coding	TPTEP2-CSNK1E	-1.25971	0.000891855
ENSG00000181135	ENSG00000181135	protein_coding	ZNF707	-1.26076	0.019586
ENSG00000164080	ENSG00000164080	protein_coding	RAD54L2	-1.26365	0.0252253
ENSG00000184381	ENSG00000184381	protein_coding	PLA2G6	-1.26397	0.0403891
ENSG00000155621	ENSG00000155621	protein_coding	C9orf85	-1.26451	0.000836881
ENSG00000197417	ENSG00000197417	protein_coding	SHPK	-1.26472	0.0178838
ENSG00000140022	ENSG00000140022	protein_coding	STON2	-1.2656	0.00173029
ENSG00000137878	ENSG00000137878	protein_coding	GCOM1	-1.26582	0.0451085
ENSG00000152147	ENSG00000152147	protein_coding	GEMIN6	-1.26608	0.00653912
ENSG00000064601	ENSG00000064601	protein_coding	CTSA	-1.26657	0.0110438
ENSG00000120662	ENSG00000120662	protein_coding	MTRF1	-1.26667	0.00684668
ENSG00000139631	ENSG00000139631	protein_coding	CSAD	-1.26687	0.00456046
ENSG00000176024	ENSG00000176024	protein_coding	ZNF613	-1.26719	0.0465865
ENSG00000105707	ENSG00000105707	protein_coding	HPN	-1.268	0.00416271
ENSG00000156239	ENSG00000156239	protein_coding	N6AMT1	-1.26865	0.00457355
ENSG00000115425	ENSG00000115425	protein_coding	PECR	-1.26866	0.0247543
ENSG00000196605	ENSG00000196605	protein_coding	ZNF846	-1.26961	0.00265815
ENSG00000101639	ENSG00000101639	protein_coding	CEP192	-1.26978	0.0417561
ENSG00000286261	ENSG00000286261	protein_coding	AC022137.3	-1.27096	0.0391804
ENSG00000181036	ENSG00000181036	protein_coding	FCRL6	-1.27226	0.0261023
ENSG00000144161	ENSG00000144161	protein_coding	ZC3H8	-1.27267	0.0190152
ENSG00000130695	ENSG00000130695	protein_coding	CEP85	-1.27452	0.0179233
ENSG00000174456	ENSG00000174456	protein_coding	C12orf76	-1.27522	0.00945331
ENSG00000111696	ENSG00000111696	protein_coding	NT5DC3	-1.27657	0.00414448
ENSG00000087237	ENSG00000087237	protein_coding	CETP	-1.27727	0.000798154
ENSG00000189420	ENSG00000189420	protein_coding	ZFP92	-1.27728	0.000860371
ENSG00000123360	ENSG00000123360	protein_coding	PDE1B	-1.27742	0.000916873
ENSG00000263020	ENSG00000263020	protein_coding	AL662899.4	-1.27921	0.0111278
ENSG00000126091	ENSG00000126091	protein_coding	ST3GAL3	-1.27968	0.00161411
ENSG00000156127	ENSG00000156127	protein_coding	BATF	-1.28089	0.00813795
ENSG00000130147	ENSG00000130147	protein_coding	SH3BP4	-1.28122	0.0158199
ENSG00000125772	ENSG00000125772	protein_coding	GPCPD1	-1.28153	0.0028244
ENSG00000215421	ENSG00000215421	protein_coding	ZNF407	-1.28186	0.0153081
ENSG00000161671	ENSG00000161671	protein_coding	EMC10	-1.28187	0.0398201
ENSG00000011201	ENSG00000011201	protein_coding	ANOS1	-1.28213	0.00315527
ENSG00000066933	ENSG00000066933	protein_coding	MYO9A	-1.28232	0.0268368
ENSG00000130193	ENSG00000130193	protein_coding	THEM6	-1.28233	0.00107611
ENSG00000126460	ENSG00000126460	protein_coding	PRRG2	-1.28248	0.00348184
ENSG00000100425	ENSG00000100425	protein_coding	BRD1	-1.28276	0.0113863
ENSG00000152439	ENSG00000152439	protein_coding	ZNF773	-1.2831	0.00652429
ENSG00000169598	ENSG00000169598	protein_coding	DFFB	-1.28316	0.00929301
ENSG00000170855	ENSG00000170855	protein_coding	TRIAP1	-1.28369	0.00819146
ENSG00000148120	ENSG00000148120	protein_coding	AOPEP	-1.28454	0.0209283
ENSG00000168778	ENSG00000168778	protein_coding	TCTN2	-1.28472	0.0039237
ENSG00000286169	ENSG00000286169	protein_coding	AHRR	-1.28492	0.0106109
ENSG00000151067	ENSG00000151067	protein_coding	CACNA1C	-1.28613	0.00273607
ENSG00000188176	ENSG00000188176	protein_coding	SMTNL2	-1.28669	0.0176286
ENSG00000186153	ENSG00000186153	protein_coding	WWOX	-1.28677	0.0440192
ENSG00000166716	ENSG00000166716	protein_coding	ZNF592	-1.28827	0.0444323
ENSG00000115687	ENSG00000115687	protein_coding	PASK	-1.28862	0.0441658
ENSG00000163472	ENSG00000163472	protein_coding	TMEM79	-1.2887	0.0496796
ENSG00000135482	ENSG00000135482	protein_coding	ZC3H10	-1.28922	0.0030826
ENSG00000128928	ENSG00000128928	protein_coding	IVD	-1.28925	0.0440867
ENSG00000144535	ENSG00000144535	protein_coding	DIS3L2	-1.28973	0.00145672
ENSG00000141404	ENSG00000141404	protein_coding	GNAL	-1.29151	0.0148427
ENSG00000145088	ENSG00000145088	protein_coding	EAF2	-1.29167	0.00112287
ENSG00000161914	ENSG00000161914	protein_coding	ZNF653	-1.29193	0.0178259
ENSG00000138002	ENSG00000138002	protein_coding	IFT172	-1.29215	0.0320386
ENSG00000112992	ENSG00000112992	protein_coding	NNT	-1.29323	0.00533883
ENSG00000026652	ENSG00000026652	protein_coding	AGPAT4	-1.29375	0.0191398
ENSG00000154229	ENSG00000154229	protein_coding	PRKCA	-1.29389	0.0121696
ENSG00000121310	ENSG00000121310	protein_coding	ECHDC2	-1.29421	0.0430692
ENSG00000144134	ENSG00000144134	protein_coding	RABL2A	-1.29574	0.00415861
ENSG00000174564	ENSG00000174564	protein_coding	IL20RB	-1.2958	0.0183561
ENSG00000113318	ENSG00000113318	protein_coding	MSH3	-1.29581	0.00122458
ENSG00000059588	ENSG00000059588	protein_coding	TARBP1	-1.29639	0.0368051
ENSG00000157212	ENSG00000157212	protein_coding	PAXIP1	-1.29751	0.0263768
ENSG00000155760	ENSG00000155760	protein_coding	FZD7	-1.29836	0.00174161
ENSG00000129038	ENSG00000129038	protein_coding	LOXL1	-1.29841	0.00564187
ENSG00000069966	ENSG00000069966	protein_coding	GNB5	-1.29849	0.00574592
ENSG00000180035	ENSG00000180035	protein_coding	ZNF48	-1.29897	0.0145949
ENSG00000204524	ENSG00000204524	protein_coding	ZNF805	-1.29927	0.0260058
ENSG00000078808	ENSG00000078808	protein_coding	SDF4	-1.29938	0.0050189
ENSG00000125944	ENSG00000125944	protein_coding	HNRNPR	-1.29985	0.0344211
ENSG00000162461	ENSG00000162461	protein_coding	SLC25A34	-1.30074	0.0102851
ENSG00000067177	ENSG00000067177	protein_coding	PHKA1	-1.30074	0.0059803
ENSG00000116670	ENSG00000116670	protein_coding	MAD2L2	-1.30082	0.0423087
ENSG00000197415	ENSG00000197415	protein_coding	VEPH1	-1.30107	0.0205643
ENSG00000151090	ENSG00000151090	protein_coding	THRB	-1.30123	0.0252687
ENSG00000245848	ENSG00000245848	protein_coding	CEBPA	-1.30141	0.0161595
ENSG00000145332	ENSG00000145332	protein_coding	KLHL8	-1.30151	0.00185739
ENSG00000018869	ENSG00000018869	protein_coding	ZNF582	-1.30207	0.00106909
ENSG00000137154	ENSG00000137154	protein_coding	RPS6	-1.30225	0.0145725
ENSG00000124466	ENSG00000124466	protein_coding	LYPD3	-1.30225	0.00188888
ENSG00000178409	ENSG00000178409	protein_coding	BEND3	-1.3032	0.0230641
ENSG00000182324	ENSG00000182324	protein_coding	KCNJ14	-1.30362	0.00142179
ENSG00000284820	ENSG00000284820	protein_coding	AC068946.2	-1.30397	0.00134968
ENSG00000174928	ENSG00000174928	protein_coding	C3orf33	-1.30522	0.00105389
ENSG00000140326	ENSG00000140326	protein_coding	CDAN1	-1.30539	0.0298297
ENSG00000147224	ENSG00000147224	protein_coding	PRPS1	-1.30568	0.0217095
ENSG00000149806	ENSG00000149806	protein_coding	FAU	-1.30638	0.0336751
ENSG00000087510	ENSG00000087510	protein_coding	TFAP2C	-1.30644	0.0315303
ENSG00000198242	ENSG00000198242	protein_coding	RPL23A	-1.30683	0.0482837
ENSG00000205517	ENSG00000205517	protein_coding	RGL3	-1.30749	0.00510265
ENSG00000078674	ENSG00000078674	protein_coding	PCM1	-1.30787	0.0402004
ENSG00000159267	ENSG00000159267	protein_coding	HLCS	-1.30793	0.000764804
ENSG00000228049	ENSG00000228049	protein_coding	POLR2J2	-1.30948	0.00278966
ENSG00000160284	ENSG00000160284	protein_coding	SPATC1L	-1.31021	0.0431044
ENSG00000106012	ENSG00000106012	protein_coding	IQCE	-1.31091	0.0148746
ENSG00000140968	ENSG00000140968	protein_coding	IRF8	-1.31133	0.00306335
ENSG00000158186	ENSG00000158186	protein_coding	MRAS	-1.31158	0.00514831
ENSG00000101444	ENSG00000101444	protein_coding	AHCY	-1.31212	0.0387667
ENSG00000144043	ENSG00000144043	protein_coding	TEX261	-1.31221	0.00236778
ENSG00000080007	ENSG00000080007	protein_coding	DDX43	-1.31246	0.00374577
ENSG00000180884	ENSG00000180884	protein_coding	ZNF792	-1.31254	0.0290878
ENSG00000105146	ENSG00000105146	protein_coding	AURKC	-1.31306	0.0175348
ENSG00000149357	ENSG00000149357	protein_coding	LAMTOR1	-1.3145	0.0395351
ENSG00000120093	ENSG00000120093	protein_coding	HOXB3	-1.31603	0.0219396
ENSG00000177380	ENSG00000177380	protein_coding	PPFIA3	-1.31647	0.0433839
ENSG00000214717	ENSG00000214717	protein_coding	ZBED1	-1.31728	0.0263535
ENSG00000177034	ENSG00000177034	protein_coding	MTX3	-1.3174	0.000881024
ENSG00000164219	ENSG00000164219	protein_coding	PGGT1B	-1.318	0.0472279
ENSG00000176531	ENSG00000176531	protein_coding	PHLDB3	-1.31812	0.00321995
ENSG00000287725	ENSG00000287725	protein_coding	AP003071.5	-1.31914	0.00117504
ENSG00000063322	ENSG00000063322	protein_coding	MED29	-1.31968	0.0064655
ENSG00000167395	ENSG00000167395	protein_coding	ZNF646	-1.31971	0.0478169
ENSG00000122085	ENSG00000122085	protein_coding	MTERF4	-1.32018	0.00580599
ENSG00000130517	ENSG00000130517	protein_coding	PGPEP1	-1.32109	0.0360947
ENSG00000145214	ENSG00000145214	protein_coding	DGKQ	-1.32252	0.00932418
ENSG00000087088	ENSG00000087088	protein_coding	BAX	-1.32333	0.0449736
ENSG00000206562	ENSG00000206562	protein_coding	METTL6	-1.3234	0.00944001
ENSG00000006576	ENSG00000006576	protein_coding	PHTF2	-1.32372	0.000672195
ENSG00000187186	ENSG00000187186	protein_coding	AL162231.1	-1.32379	0.00109502
ENSG00000144320	ENSG00000144320	protein_coding	LNPK	-1.32386	0.000714208
ENSG00000244693	ENSG00000244693	protein_coding	CTAGE8	-1.32412	0.0315845
ENSG00000109618	ENSG00000109618	protein_coding	SEPSECS	-1.32537	0.00164005
ENSG00000065060	ENSG00000065060	protein_coding	UHRF1BP1	-1.32562	0.0338911
ENSG00000065883	ENSG00000065883	protein_coding	CDK13	-1.3257	0.0175507
ENSG00000084207	ENSG00000084207	protein_coding	GSTP1	-1.32587	0.0178828
ENSG00000168159	ENSG00000168159	protein_coding	RNF187	-1.32672	0.0161759
ENSG00000139574	ENSG00000139574	protein_coding	NPFF	-1.32736	0.00535334
ENSG00000168096	ENSG00000168096	protein_coding	ANKS3	-1.32764	0.0237933
ENSG00000198393	ENSG00000198393	protein_coding	ZNF26	-1.32915	0.0174717
ENSG00000133067	ENSG00000133067	protein_coding	LGR6	-1.3299	0.0495462
ENSG00000116141	ENSG00000116141	protein_coding	MARK1	-1.33187	0.00112824
ENSG00000104205	ENSG00000104205	protein_coding	SGK3	-1.33352	0.0310354
ENSG00000115594	ENSG00000115594	protein_coding	IL1R1	-1.33361	0.0377506
ENSG00000183751	ENSG00000183751	protein_coding	TBL3	-1.33423	0.0390045
ENSG00000007541	ENSG00000007541	protein_coding	PIGQ	-1.33615	0.0487688
ENSG00000047617	ENSG00000047617	protein_coding	ANO2	-1.33653	0.0499847
ENSG00000031691	ENSG00000031691	protein_coding	CENPQ	-1.33663	0.0222715
ENSG00000143845	ENSG00000143845	protein_coding	ETNK2	-1.33735	0.00169976
ENSG00000243896	ENSG00000243896	protein_coding	OR2A7	-1.33762	0.00510665
ENSG00000115290	ENSG00000115290	protein_coding	GRB14	-1.33787	0.0296681
ENSG00000131037	ENSG00000131037	protein_coding	EPS8L1	-1.33926	0.000650176
ENSG00000137193	ENSG00000137193	protein_coding	PIM1	-1.34011	0.017798
ENSG00000117868	ENSG00000117868	protein_coding	ESYT2	-1.34071	0.00123286
ENSG00000089177	ENSG00000089177	protein_coding	KIF16B	-1.34257	0.000856886
ENSG00000196950	ENSG00000196950	protein_coding	SLC39A10	-1.34346	0.0131274
ENSG00000167716	ENSG00000167716	protein_coding	WDR81	-1.34355	0.0108352
ENSG00000183309	ENSG00000183309	protein_coding	ZNF623	-1.34405	0.00520236
ENSG00000180376	ENSG00000180376	protein_coding	CCDC66	-1.34567	0.0330027
ENSG00000172123	ENSG00000172123	protein_coding	SLFN12	-1.34647	0.0225821
ENSG00000140488	ENSG00000140488	protein_coding	CELF6	-1.34818	0.0264361
ENSG00000145604	ENSG00000145604	protein_coding	SKP2	-1.34902	0.00937384
ENSG00000058453	ENSG00000058453	protein_coding	CROCC	-1.34907	0.0131433
ENSG00000005206	ENSG00000005206	protein_coding	SPPL2B	-1.34966	0.0313656
ENSG00000254505	ENSG00000254505	protein_coding	CHMP4A	-1.35017	0.0171697
ENSG00000108733	ENSG00000108733	protein_coding	PEX12	-1.35142	0.0339636
ENSG00000168517	ENSG00000168517	protein_coding	HEXIM2	-1.35156	0.00422742
ENSG00000128849	ENSG00000128849	protein_coding	CGNL1	-1.35434	0.00377904
ENSG00000105193	ENSG00000105193	protein_coding	RPS16	-1.35472	0.0388655
ENSG00000138439	ENSG00000138439	protein_coding	FAM117B	-1.3551	0.000951521
ENSG00000100023	ENSG00000100023	protein_coding	PPIL2	-1.35544	0.0284114
ENSG00000163029	ENSG00000163029	protein_coding	SMC6	-1.35794	0.0290437
ENSG00000164659	ENSG00000164659	protein_coding	KIAA1324L	-1.35855	0.0340512
ENSG00000134668	ENSG00000134668	protein_coding	SPOCD1	-1.36086	0.038715
ENSG00000111639	ENSG00000111639	protein_coding	MRPL51	-1.36224	0.0157303
ENSG00000068097	ENSG00000068097	protein_coding	HEATR6	-1.36299	0.00104601
ENSG00000196814	ENSG00000196814	protein_coding	MVB12B	-1.36325	0.00782552
ENSG00000196683	ENSG00000196683	protein_coding	TOMM7	-1.36385	0.0171932
ENSG00000173064	ENSG00000173064	protein_coding	HECTD4	-1.36497	0.00604739
ENSG00000135773	ENSG00000135773	protein_coding	CAPN9	-1.36616	0.0299506
ENSG00000167536	ENSG00000167536	protein_coding	DHRS13	-1.36697	0.00433755
ENSG00000173137	ENSG00000173137	protein_coding	ADCK5	-1.36775	0.0110419
ENSG00000026297	ENSG00000026297	protein_coding	RNASET2	-1.3679	0.00678757
ENSG00000083097	ENSG00000083097	protein_coding	DOP1A	-1.36798	0.00857959
ENSG00000183844	ENSG00000183844	protein_coding	FAM3B	-1.36962	0.0439597
ENSG00000116133	ENSG00000116133	protein_coding	DHCR24	-1.36987	0.00855089
ENSG00000118960	ENSG00000118960	protein_coding	HS1BP3	-1.37098	0.0102891
ENSG00000082269	ENSG00000082269	protein_coding	FAM135A	-1.37211	0.0423303
ENSG00000135083	ENSG00000135083	protein_coding	CCNJL	-1.37218	0.0209713
ENSG00000099326	ENSG00000099326	protein_coding	MZF1	-1.37226	0.0410847
ENSG00000120696	ENSG00000120696	protein_coding	KBTBD7	-1.3735	0.0223789
ENSG00000099904	ENSG00000099904	protein_coding	ZDHHC8	-1.37352	0.00274372
ENSG00000180089	ENSG00000180089	protein_coding	TMEM86B	-1.377	0.000606846
ENSG00000105520	ENSG00000105520	protein_coding	PLPPR2	-1.37813	0.0380721
ENSG00000248643	ENSG00000248643	protein_coding	RBM14-RBM4	-1.38116	0.0268602
ENSG00000105173	ENSG00000105173	protein_coding	CCNE1	-1.38121	0.0426731
ENSG00000161551	ENSG00000161551	protein_coding	ZNF577	-1.38125	0.00648363
ENSG00000173848	ENSG00000173848	protein_coding	NET1	-1.38152	0.0280896
ENSG00000061936	ENSG00000061936	protein_coding	SFSWAP	-1.38284	0.0231139
ENSG00000197037	ENSG00000197037	protein_coding	ZSCAN25	-1.38337	0.0383737
ENSG00000085276	ENSG00000085276	protein_coding	MECOM	-1.38357	0.0152531
ENSG00000213337	ENSG00000213337	protein_coding	ANKRD39	-1.38433	0.0096075
ENSG00000205089	ENSG00000205089	protein_coding	CCNI2	-1.3845	0.000593165
ENSG00000284773	ENSG00000284773	protein_coding	AC114490.3	-1.38457	0.0219321
ENSG00000160877	ENSG00000160877	protein_coding	NACC1	-1.38467	0.0325084
ENSG00000103550	ENSG00000103550	protein_coding	KNOP1	-1.38603	0.0198573
ENSG00000106125	ENSG00000106125	protein_coding	MINDY4	-1.3878	0.0477563
ENSG00000148832	ENSG00000148832	protein_coding	PAOX	-1.38866	0.00706766
ENSG00000143867	ENSG00000143867	protein_coding	OSR1	-1.38959	0.0496615
ENSG00000103174	ENSG00000103174	protein_coding	NAGPA	-1.39079	0.0233513
ENSG00000143252	ENSG00000143252	protein_coding	SDHC	-1.39145	0.03762
ENSG00000164683	ENSG00000164683	protein_coding	HEY1	-1.39158	0.00815736
ENSG00000123349	ENSG00000123349	protein_coding	PFDN5	-1.39186	0.00371209
ENSG00000094631	ENSG00000094631	protein_coding	HDAC6	-1.39215	0.00214876
ENSG00000022976	ENSG00000022976	protein_coding	ZNF839	-1.39249	0.00551867
ENSG00000155636	ENSG00000155636	protein_coding	RBM45	-1.39306	0.00108904
ENSG00000182919	ENSG00000182919	protein_coding	C11orf54	-1.39397	0.0348276
ENSG00000131368	ENSG00000131368	protein_coding	MRPS25	-1.39435	0.0354159
ENSG00000144645	ENSG00000144645	protein_coding	OSBPL10	-1.39478	0.00058435
ENSG00000179941	ENSG00000179941	protein_coding	BBS10	-1.39549	0.0110571
ENSG00000134461	ENSG00000134461	protein_coding	ANKRD16	-1.39608	0.000910883
ENSG00000144559	ENSG00000144559	protein_coding	TAMM41	-1.39647	0.00986393
ENSG00000196459	ENSG00000196459	protein_coding	TRAPPC2	-1.39715	0.00153107
ENSG00000176595	ENSG00000176595	protein_coding	KBTBD11	-1.39931	0.00431243
ENSG00000167377	ENSG00000167377	protein_coding	ZNF23	-1.40052	0.0227597
ENSG00000205923	ENSG00000205923	protein_coding	CEMP1	-1.40256	0.0257617
ENSG00000185220	ENSG00000185220	protein_coding	PGBD2	-1.40268	0.00574349
ENSG00000177646	ENSG00000177646	protein_coding	ACAD9	-1.40281	0.0306792
ENSG00000155275	ENSG00000155275	protein_coding	TRMT44	-1.40304	0.0304874
ENSG00000147123	ENSG00000147123	protein_coding	NDUFB11	-1.40336	0.0197556
ENSG00000205726	ENSG00000205726	protein_coding	ITSN1	-1.40375	0.0102832
ENSG00000112234	ENSG00000112234	protein_coding	FBXL4	-1.40398	0.00140041
ENSG00000273154	ENSG00000273154	protein_coding	AL121845.3	-1.40434	0.00669403
ENSG00000108384	ENSG00000108384	protein_coding	RAD51C	-1.40462	0.0247766
ENSG00000144306	ENSG00000144306	protein_coding	SCRN3	-1.40481	0.0170023
ENSG00000137460	ENSG00000137460	protein_coding	FHDC1	-1.40517	0.00296355
ENSG00000006128	ENSG00000006128	protein_coding	TAC1	-1.40613	0.00638429
ENSG00000269343	ENSG00000269343	protein_coding	ZNF587B	-1.4063	0.0147539
ENSG00000213380	ENSG00000213380	protein_coding	COG8	-1.40638	0.0323461
ENSG00000197857	ENSG00000197857	protein_coding	ZNF44	-1.4068	0.0496947
ENSG00000115977	ENSG00000115977	protein_coding	AAK1	-1.40722	0.0126584
ENSG00000184378	ENSG00000184378	protein_coding	ACTRT3	-1.40723	0.0205537
ENSG00000187961	ENSG00000187961	protein_coding	KLHL17	-1.40802	0.0394426
ENSG00000167670	ENSG00000167670	protein_coding	CHAF1A	-1.40815	0.000564729
ENSG00000119632	ENSG00000119632	protein_coding	IFI27L2	-1.41059	0.0263257
ENSG00000173715	ENSG00000173715	protein_coding	C11orf80	-1.41161	0.000690109
ENSG00000186395	ENSG00000186395	protein_coding	KRT10	-1.41207	0.0145846
ENSG00000184786	ENSG00000184786	protein_coding	TCTE3	-1.41262	0.0463352
ENSG00000151893	ENSG00000151893	protein_coding	CACUL1	-1.41264	0.0336105
ENSG00000174236	ENSG00000174236	protein_coding	REP15	-1.41377	0.0373893
ENSG00000146067	ENSG00000146067	protein_coding	FAM193B	-1.41401	0.0112289
ENSG00000150995	ENSG00000150995	protein_coding	ITPR1	-1.41516	0.0105433
ENSG00000160703	ENSG00000160703	protein_coding	NLRX1	-1.41583	0.0462685
ENSG00000259120	ENSG00000259120	protein_coding	SMIM6	-1.4164	0.0157321
ENSG00000170631	ENSG00000170631	protein_coding	ZNF16	-1.4166	0.00114568
ENSG00000102226	ENSG00000102226	protein_coding	USP11	-1.41818	0.00834036
ENSG00000173598	ENSG00000173598	protein_coding	NUDT4	-1.41829	0.00227577
ENSG00000169696	ENSG00000169696	protein_coding	ASPSCR1	-1.41862	0.00429306
ENSG00000172954	ENSG00000172954	protein_coding	LCLAT1	-1.4202	0.044095
ENSG00000115353	ENSG00000115353	protein_coding	TACR1	-1.42023	0.0462401
ENSG00000249915	ENSG00000249915	protein_coding	PDCD6	-1.42102	0.0227001
ENSG00000128944	ENSG00000128944	protein_coding	KNSTRN	-1.42196	0.00281501
ENSG00000198286	ENSG00000198286	protein_coding	CARD11	-1.42211	0.034907
ENSG00000103260	ENSG00000103260	protein_coding	METRN	-1.42266	0.0111757
ENSG00000156508	ENSG00000156508	protein_coding	EEF1A1	-1.42303	0.0323335
ENSG00000197978	ENSG00000197978	protein_coding	GOLGA6L9	-1.42328	0.000571971
ENSG00000127580	ENSG00000127580	protein_coding	WDR24	-1.42346	0.0139192
ENSG00000158292	ENSG00000158292	protein_coding	GPR153	-1.42371	0.0363437
ENSG00000136059	ENSG00000136059	protein_coding	VILL	-1.42398	0.00964531
ENSG00000106178	ENSG00000106178	protein_coding	CCL24	-1.42436	0.00123265
ENSG00000157823	ENSG00000157823	protein_coding	AP3S2	-1.42482	0.0389124
ENSG00000071073	ENSG00000071073	protein_coding	MGAT4A	-1.42504	0.0403822
ENSG00000204514	ENSG00000204514	protein_coding	ZNF814	-1.42553	0.0261288
ENSG00000109794	ENSG00000109794	protein_coding	FAM149A	-1.42604	0.00451626
ENSG00000131591	ENSG00000131591	protein_coding	C1orf159	-1.42731	0.00175265
ENSG00000134901	ENSG00000134901	protein_coding	POGLUT2	-1.42808	0.000938288
ENSG00000112033	ENSG00000112033	protein_coding	PPARD	-1.42809	0.020362
ENSG00000134982	ENSG00000134982	protein_coding	APC	-1.42821	0.00568589
ENSG00000168228	ENSG00000168228	protein_coding	ZCCHC4	-1.42882	0.00261141
ENSG00000205808	ENSG00000205808	protein_coding	PLPP6	-1.43109	0.0190868
ENSG00000174151	ENSG00000174151	protein_coding	CYB561D1	-1.43109	0.00155861
ENSG00000103852	ENSG00000103852	protein_coding	TTC23	-1.43304	0.0177544
ENSG00000159086	ENSG00000159086	protein_coding	PAXBP1	-1.43398	0.03355
ENSG00000007402	ENSG00000007402	protein_coding	CACNA2D2	-1.43509	0.00234495
ENSG00000104427	ENSG00000104427	protein_coding	ZC2HC1A	-1.43528	0.000582752
ENSG00000159307	ENSG00000159307	protein_coding	SCUBE1	-1.43598	0.000556464
ENSG00000006695	ENSG00000006695	protein_coding	COX10	-1.43675	0.0183583
ENSG00000139291	ENSG00000139291	protein_coding	TMEM19	-1.43847	0.00203722
ENSG00000105755	ENSG00000105755	protein_coding	ETHE1	-1.43934	0.0444143
ENSG00000167900	ENSG00000167900	protein_coding	TK1	-1.43983	0.0280874
ENSG00000172137	ENSG00000172137	protein_coding	CALB2	-1.44013	0.000681856
ENSG00000197614	ENSG00000197614	protein_coding	MFAP5	-1.44076	0.0448622
ENSG00000171295	ENSG00000171295	protein_coding	ZNF440	-1.4409	0.0201689
ENSG00000147130	ENSG00000147130	protein_coding	ZMYM3	-1.441	0.0481496
ENSG00000185829	ENSG00000185829	protein_coding	ARL17A	-1.44257	0.0439449
ENSG00000150054	ENSG00000150054	protein_coding	MPP7	-1.44282	0.00541035
ENSG00000206538	ENSG00000206538	protein_coding	VGLL3	-1.44307	0.0220811
ENSG00000136003	ENSG00000136003	protein_coding	ISCU	-1.44365	0.00247937
ENSG00000116833	ENSG00000116833	protein_coding	NR5A2	-1.44439	0.0195317
ENSG00000073111	ENSG00000073111	protein_coding	MCM2	-1.44446	0.00283397
ENSG00000137101	ENSG00000137101	protein_coding	CD72	-1.44473	0.00498871
ENSG00000188818	ENSG00000188818	protein_coding	ZDHHC11	-1.44485	0.0335211
ENSG00000110274	ENSG00000110274	protein_coding	CEP164	-1.44523	0.00255464
ENSG00000067646	ENSG00000067646	protein_coding	ZFY	-1.44565	0.00989615
ENSG00000143420	ENSG00000143420	protein_coding	ENSA	-1.44803	0.00327405
ENSG00000174010	ENSG00000174010	protein_coding	KLHL15	-1.4482	0.0314131
ENSG00000196329	ENSG00000196329	protein_coding	GIMAP5	-1.44851	0.0362015
ENSG00000244038	ENSG00000244038	protein_coding	DDOST	-1.44871	0.0234011
ENSG00000142330	ENSG00000142330	protein_coding	CAPN10	-1.44929	0.000632017
ENSG00000151348	ENSG00000151348	protein_coding	EXT2	-1.44944	0.0496246
ENSG00000122912	ENSG00000122912	protein_coding	SLC25A16	-1.44958	0.00727965
ENSG00000035664	ENSG00000035664	protein_coding	DAPK2	-1.45138	0.020495
ENSG00000076650	ENSG00000076650	protein_coding	GPATCH1	-1.45238	0.00161681
ENSG00000164587	ENSG00000164587	protein_coding	RPS14	-1.45279	0.0182648
ENSG00000128645	ENSG00000128645	protein_coding	HOXD1	-1.4529	0.0375381
ENSG00000133812	ENSG00000133812	protein_coding	SBF2	-1.4529	0.042837
ENSG00000132600	ENSG00000132600	protein_coding	PRMT7	-1.45295	0.00395421
ENSG00000206384	ENSG00000206384	protein_coding	COL6A6	-1.45374	0.0397545
ENSG00000167535	ENSG00000167535	protein_coding	CACNB3	-1.45443	0.0324576
ENSG00000107816	ENSG00000107816	protein_coding	LZTS2	-1.45485	0.0195505
ENSG00000160961	ENSG00000160961	protein_coding	ZNF333	-1.45486	0.0233887
ENSG00000178209	ENSG00000178209	protein_coding	PLEC	-1.45491	0.0385957
ENSG00000122870	ENSG00000122870	protein_coding	BICC1	-1.45531	0.0367199
ENSG00000175455	ENSG00000175455	protein_coding	CCDC14	-1.45637	0.0421849
ENSG00000151778	ENSG00000151778	protein_coding	SERP2	-1.45656	0.0371918
ENSG00000141101	ENSG00000141101	protein_coding	NOB1	-1.45729	0.0279208
ENSG00000004838	ENSG00000004838	protein_coding	ZMYND10	-1.45829	0.0308563
ENSG00000104047	ENSG00000104047	protein_coding	DTWD1	-1.45851	0.00051254
ENSG00000225828	ENSG00000225828	protein_coding	FAM229A	-1.46031	0.0102581
ENSG00000188917	ENSG00000188917	protein_coding	TRMT2B	-1.46341	0.00687868
ENSG00000170954	ENSG00000170954	protein_coding	ZNF415	-1.46361	0.000891831
ENSG00000135414	ENSG00000135414	protein_coding	GDF11	-1.46368	0.00327094
ENSG00000111860	ENSG00000111860	protein_coding	CEP85L	-1.46595	0.0272644
ENSG00000256671	ENSG00000256671	protein_coding	LIMS4	-1.46622	0.000511151
ENSG00000010072	ENSG00000010072	protein_coding	SPRTN	-1.46644	0.0210928
ENSG00000204954	ENSG00000204954	protein_coding	C12orf73	-1.46684	0.0081259
ENSG00000131351	ENSG00000131351	protein_coding	HAUS8	-1.46702	0.043438
ENSG00000002016	ENSG00000002016	protein_coding	RAD52	-1.46863	0.00673903
ENSG00000140993	ENSG00000140993	protein_coding	TIGD7	-1.46902	0.00488967
ENSG00000120647	ENSG00000120647	protein_coding	CCDC77	-1.47049	0.0011376
ENSG00000197619	ENSG00000197619	protein_coding	ZNF615	-1.47178	0.0340842
ENSG00000163794	ENSG00000163794	protein_coding	UCN	-1.47223	0.0133616
ENSG00000152137	ENSG00000152137	protein_coding	HSPB8	-1.47236	0.0351394
ENSG00000233493	ENSG00000233493	protein_coding	TMEM238	-1.47279	0.000992909
ENSG00000183060	ENSG00000183060	protein_coding	LYSMD4	-1.47299	0.0211534
ENSG00000116198	ENSG00000116198	protein_coding	CEP104	-1.47339	0.00547967
ENSG00000046889	ENSG00000046889	protein_coding	PREX2	-1.47353	0.0176591
ENSG00000110455	ENSG00000110455	protein_coding	ACCS	-1.47415	0.0184895
ENSG00000126001	ENSG00000126001	protein_coding	CEP250	-1.47577	0.022905
ENSG00000103479	ENSG00000103479	protein_coding	RBL2	-1.47589	0.0104078
ENSG00000134317	ENSG00000134317	protein_coding	GRHL1	-1.47591	0.00280236
ENSG00000183826	ENSG00000183826	protein_coding	BTBD9	-1.47734	0.0461643
ENSG00000112599	ENSG00000112599	protein_coding	GUCA1B	-1.47749	0.0441036
ENSG00000109536	ENSG00000109536	protein_coding	FRG1	-1.47845	0.0146869
ENSG00000205476	ENSG00000205476	protein_coding	CCDC85C	-1.47971	0.0160843
ENSG00000134744	ENSG00000134744	protein_coding	TUT4	-1.48003	0.0457248
ENSG00000176182	ENSG00000176182	protein_coding	MYPOP	-1.48056	0.00066456
ENSG00000198105	ENSG00000198105	protein_coding	ZNF248	-1.48087	0.0115875
ENSG00000204084	ENSG00000204084	protein_coding	INPP5B	-1.4812	0.000970069
ENSG00000144120	ENSG00000144120	protein_coding	TMEM177	-1.48145	0.0344563
ENSG00000126882	ENSG00000126882	protein_coding	FAM78A	-1.48162	0.00102235
ENSG00000173818	ENSG00000173818	protein_coding	ENDOV	-1.48196	0.00122548
ENSG00000188807	ENSG00000188807	protein_coding	TMEM201	-1.48241	0.000522448
ENSG00000160973	ENSG00000160973	protein_coding	FOXH1	-1.48414	0.00446236
ENSG00000047578	ENSG00000047578	protein_coding	KIAA0556	-1.48419	0.0145957
ENSG00000133424	ENSG00000133424	protein_coding	LARGE1	-1.48445	0.0264416
ENSG00000258311	ENSG00000258311	protein_coding	AC009779.4	-1.48453	0.00117461
ENSG00000164983	ENSG00000164983	protein_coding	TMEM65	-1.48566	0.00101136
ENSG00000165868	ENSG00000165868	protein_coding	HSPA12A	-1.48662	0.00858979
ENSG00000157350	ENSG00000157350	protein_coding	ST3GAL2	-1.48707	0.0256419
ENSG00000136193	ENSG00000136193	protein_coding	SCRN1	-1.48725	0.046374
ENSG00000114904	ENSG00000114904	protein_coding	NEK4	-1.48729	0.0144923
ENSG00000196867	ENSG00000196867	protein_coding	ZFP28	-1.48809	0.0100742
ENSG00000182685	ENSG00000182685	protein_coding	BRICD5	-1.48879	0.00384357
ENSG00000161800	ENSG00000161800	protein_coding	RACGAP1	-1.48931	0.000897847
ENSG00000250571	ENSG00000250571	protein_coding	GLI4	-1.48947	0.000910405
ENSG00000146063	ENSG00000146063	protein_coding	TRIM41	-1.48958	0.0118554
ENSG00000125967	ENSG00000125967	protein_coding	NECAB3	-1.49091	0.00279321
ENSG00000163214	ENSG00000163214	protein_coding	DHX57	-1.49115	0.00199414
ENSG00000197386	ENSG00000197386	protein_coding	HTT	-1.49144	0.012489
ENSG00000198677	ENSG00000198677	protein_coding	TTC37	-1.49279	0.0366876
ENSG00000104883	ENSG00000104883	protein_coding	PEX11G	-1.49389	0.0156188
ENSG00000108474	ENSG00000108474	protein_coding	PIGL	-1.49469	0.0143161
ENSG00000182093	ENSG00000182093	protein_coding	GET1	-1.49492	0.0215935
ENSG00000100796	ENSG00000100796	protein_coding	PPP4R3A	-1.49499	0.0355066
ENSG00000128268	ENSG00000128268	protein_coding	MGAT3	-1.49589	0.000490191
ENSG00000164919	ENSG00000164919	protein_coding	COX6C	-1.49591	0.00203429
ENSG00000172794	ENSG00000172794	protein_coding	RAB37	-1.49623	0.00856735
ENSG00000103047	ENSG00000103047	protein_coding	TANGO6	-1.49746	0.0125181
ENSG00000274322	ENSG00000274322	protein_coding	AL136531.2	-1.49788	0.0229326
ENSG00000163629	ENSG00000163629	protein_coding	PTPN13	-1.4983	0.000586025
ENSG00000171823	ENSG00000171823	protein_coding	FBXL14	-1.49838	0.00129278
ENSG00000130304	ENSG00000130304	protein_coding	SLC27A1	-1.49867	0.00261497
ENSG00000163634	ENSG00000163634	protein_coding	THOC7	-1.49924	0.000700901
ENSG00000078549	ENSG00000078549	protein_coding	ADCYAP1R1	-1.49976	0.0233093
ENSG00000167632	ENSG00000167632	protein_coding	TRAPPC9	-1.49987	0.0151779
ENSG00000109756	ENSG00000109756	protein_coding	RAPGEF2	-1.50007	0.0467182
ENSG00000071794	ENSG00000071794	protein_coding	HLTF	-1.50057	0.000849427
ENSG00000285053	ENSG00000285053	protein_coding	TBCE	-1.50118	0.00483172
ENSG00000165752	ENSG00000165752	protein_coding	STK32C	-1.50264	0.000475177
ENSG00000267120	ENSG00000267120	protein_coding	AD000671.2	-1.50277	0.0082626
ENSG00000198324	ENSG00000198324	protein_coding	PHETA1	-1.50422	0.00214448
ENSG00000085998	ENSG00000085998	protein_coding	POMGNT1	-1.50515	0.0123585
ENSG00000141012	ENSG00000141012	protein_coding	GALNS	-1.5056	0.021926
ENSG00000105576	ENSG00000105576	protein_coding	TNPO2	-1.50681	0.00165102
ENSG00000121957	ENSG00000121957	protein_coding	GPSM2	-1.50688	0.000493728
ENSG00000152154	ENSG00000152154	protein_coding	TMEM178A	-1.50718	0.0388875
ENSG00000198492	ENSG00000198492	protein_coding	YTHDF2	-1.50767	0.0354701
ENSG00000118965	ENSG00000118965	protein_coding	WDR35	-1.5077	0.0461304
ENSG00000152939	ENSG00000152939	protein_coding	MARVELD2	-1.51045	0.0123792
ENSG00000185905	ENSG00000185905	protein_coding	C16orf54	-1.51181	0.00150371
ENSG00000138316	ENSG00000138316	protein_coding	ADAMTS14	-1.51197	0.0267901
ENSG00000141564	ENSG00000141564	protein_coding	RPTOR	-1.51216	0.00181487
ENSG00000107679	ENSG00000107679	protein_coding	PLEKHA1	-1.51362	0.0288062
ENSG00000081913	ENSG00000081913	protein_coding	PHLPP1	-1.51405	0.0165487
ENSG00000255526	ENSG00000255526	protein_coding	NEDD8-MDP1	-1.51507	0.00965088
ENSG00000013573	ENSG00000013573	protein_coding	DDX11	-1.51581	0.0309461
ENSG00000135486	ENSG00000135486	protein_coding	HNRNPA1	-1.51607	0.0261295
ENSG00000047648	ENSG00000047648	protein_coding	ARHGAP6	-1.51622	0.026356
ENSG00000145337	ENSG00000145337	protein_coding	PYURF	-1.51634	0.0225139
ENSG00000018610	ENSG00000018610	protein_coding	CXorf56	-1.51635	0.00403278
ENSG00000156521	ENSG00000156521	protein_coding	TYSND1	-1.51657	0.000464428
ENSG00000135956	ENSG00000135956	protein_coding	TMEM127	-1.51689	0.0095542
ENSG00000152359	ENSG00000152359	protein_coding	POC5	-1.5173	0.0177675
ENSG00000204519	ENSG00000204519	protein_coding	ZNF551	-1.51831	0.0082867
ENSG00000185100	ENSG00000185100	protein_coding	ADSS1	-1.51842	0.0013866
ENSG00000135547	ENSG00000135547	protein_coding	HEY2	-1.51861	0.0157271
ENSG00000168653	ENSG00000168653	protein_coding	NDUFS5	-1.51909	0.0113048
ENSG00000159433	ENSG00000159433	protein_coding	STARD9	-1.51972	0.000462798
ENSG00000088543	ENSG00000088543	protein_coding	C3orf18	-1.52107	0.0249793
ENSG00000154122	ENSG00000154122	protein_coding	ANKH	-1.5214	0.0136279
ENSG00000174516	ENSG00000174516	protein_coding	PELI3	-1.52211	0.0315418
ENSG00000235272	ENSG00000235272	protein_coding	RAMACL	-1.52239	0.0289647
ENSG00000196422	ENSG00000196422	protein_coding	PPP1R26	-1.52307	0.0260768
ENSG00000169629	ENSG00000169629	protein_coding	RGPD8	-1.52532	0.0366411
ENSG00000171444	ENSG00000171444	protein_coding	MCC	-1.52615	0.0181107
ENSG00000156299	ENSG00000156299	protein_coding	TIAM1	-1.52662	0.0164137
ENSG00000137818	ENSG00000137818	protein_coding	RPLP1	-1.5277	0.00406722
ENSG00000107104	ENSG00000107104	protein_coding	KANK1	-1.52786	0.0446964
ENSG00000006025	ENSG00000006025	protein_coding	OSBPL7	-1.52788	0.00270734
ENSG00000171621	ENSG00000171621	protein_coding	SPSB1	-1.52911	0.0100305
ENSG00000167770	ENSG00000167770	protein_coding	OTUB1	-1.52944	0.012507
ENSG00000198795	ENSG00000198795	protein_coding	ZNF521	-1.53042	0.00643095
ENSG00000111405	ENSG00000111405	protein_coding	ENDOU	-1.5315	0.000446189
ENSG00000105136	ENSG00000105136	protein_coding	ZNF419	-1.5316	0.0196261
ENSG00000224051	ENSG00000224051	protein_coding	CPTP	-1.53201	0.011456
ENSG00000183765	ENSG00000183765	protein_coding	CHEK2	-1.53243	0.030349
ENSG00000181031	ENSG00000181031	protein_coding	RPH3AL	-1.53277	0.0194908
ENSG00000103067	ENSG00000103067	protein_coding	ESRP2	-1.53419	0.025201
ENSG00000170561	ENSG00000170561	protein_coding	IRX2	-1.53443	0.0116908
ENSG00000116668	ENSG00000116668	protein_coding	SWT1	-1.53529	0.0191728
ENSG00000106479	ENSG00000106479	protein_coding	ZNF862	-1.53548	0.000566554
ENSG00000078487	ENSG00000078487	protein_coding	ZCWPW1	-1.53612	0.000556305
ENSG00000256087	ENSG00000256087	protein_coding	ZNF432	-1.53752	0.00577371
ENSG00000072506	ENSG00000072506	protein_coding	HSD17B10	-1.53875	0.0033355
ENSG00000183153	ENSG00000183153	protein_coding	GJD3	-1.53881	0.00794582
ENSG00000165775	ENSG00000165775	protein_coding	FUNDC2	-1.53952	0.0435258
ENSG00000066739	ENSG00000066739	protein_coding	ATG2B	-1.53994	0.0174176
ENSG00000176945	ENSG00000176945	protein_coding	MUC20	-1.54216	0.0177679
ENSG00000176438	ENSG00000176438	protein_coding	SYNE3	-1.54263	0.00317818
ENSG00000126458	ENSG00000126458	protein_coding	RRAS	-1.5431	0.0173579
ENSG00000078687	ENSG00000078687	protein_coding	TNRC6C	-1.54314	0.000897488
ENSG00000077235	ENSG00000077235	protein_coding	GTF3C1	-1.54448	0.0154704
ENSG00000124782	ENSG00000124782	protein_coding	RREB1	-1.54553	0.0265411
ENSG00000103248	ENSG00000103248	protein_coding	MTHFSD	-1.54589	0.000747722
ENSG00000083812	ENSG00000083812	protein_coding	ZNF324	-1.54631	0.00470626
ENSG00000137501	ENSG00000137501	protein_coding	SYTL2	-1.54753	0.0223322
ENSG00000164406	ENSG00000164406	protein_coding	LEAP2	-1.54787	0.00166797
ENSG00000125810	ENSG00000125810	protein_coding	CD93	-1.54809	0.0471715
ENSG00000178386	ENSG00000178386	protein_coding	ZNF223	-1.54826	0.000942191
ENSG00000236609	ENSG00000236609	protein_coding	ZNF853	-1.54922	0.000458487
ENSG00000215217	ENSG00000215217	protein_coding	C5orf49	-1.55025	0.0386694
ENSG00000163138	ENSG00000163138	protein_coding	PACRGL	-1.55107	0.00255793
ENSG00000125868	ENSG00000125868	protein_coding	DSTN	-1.55117	0.0492589
ENSG00000113638	ENSG00000113638	protein_coding	TTC33	-1.55253	0.0028278
ENSG00000235194	ENSG00000235194	protein_coding	PPP1R3E	-1.55335	0.0056233
ENSG00000197951	ENSG00000197951	protein_coding	ZNF71	-1.55381	0.0422256
ENSG00000143437	ENSG00000143437	protein_coding	ARNT	-1.55559	0.0205224
ENSG00000074935	ENSG00000074935	protein_coding	TUBE1	-1.5565	0.0371089
ENSG00000188542	ENSG00000188542	protein_coding	DUSP28	-1.55764	0.00929484
ENSG00000175318	ENSG00000175318	protein_coding	GRAMD2A	-1.55847	0.0121985
ENSG00000079805	ENSG00000079805	protein_coding	DNM2	-1.55852	0.0306056
ENSG00000006634	ENSG00000006634	protein_coding	DBF4	-1.55859	0.0379167
ENSG00000171723	ENSG00000171723	protein_coding	GPHN	-1.55953	0.037269
ENSG00000058056	ENSG00000058056	protein_coding	USP13	-1.55975	0.0337224
ENSG00000189227	ENSG00000189227	protein_coding	C15orf61	-1.55984	0.00051671
ENSG00000197763	ENSG00000197763	protein_coding	TXNRD3	-1.56088	0.00634445
ENSG00000156345	ENSG00000156345	protein_coding	CDK20	-1.56116	0.023903
ENSG00000215790	ENSG00000215790	protein_coding	SLC35E2A	-1.56143	0.0121079
ENSG00000130165	ENSG00000130165	protein_coding	ELOF1	-1.56204	0.00428351
ENSG00000198331	ENSG00000198331	protein_coding	HYLS1	-1.56458	0.0288366
ENSG00000005801	ENSG00000005801	protein_coding	ZNF195	-1.56572	0.0442885
ENSG00000180902	ENSG00000180902	protein_coding	D2HGDH	-1.56575	0.00209921
ENSG00000006468	ENSG00000006468	protein_coding	ETV1	-1.56614	0.0319397
ENSG00000265303	ENSG00000265303	protein_coding	AC099850.3	-1.56653	0.000927292
ENSG00000152465	ENSG00000152465	protein_coding	NMT2	-1.5669	0.00605397
ENSG00000186272	ENSG00000186272	protein_coding	ZNF17	-1.56736	0.00583286
ENSG00000004660	ENSG00000004660	protein_coding	CAMKK1	-1.56764	0.0276767
ENSG00000112902	ENSG00000112902	protein_coding	SEMA5A	-1.56765	0.0206472
ENSG00000168116	ENSG00000168116	protein_coding	KIAA1586	-1.56826	0.000772131
ENSG00000175048	ENSG00000175048	protein_coding	ZDHHC14	-1.56856	0.000456566
ENSG00000169021	ENSG00000169021	protein_coding	UQCRFS1	-1.56914	0.0194329
ENSG00000121297	ENSG00000121297	protein_coding	TSHZ3	-1.56935	0.00494732
ENSG00000099308	ENSG00000099308	protein_coding	MAST3	-1.56948	0.000430959
ENSG00000204310	ENSG00000204310	protein_coding	AGPAT1	-1.57083	0.0168712
ENSG00000143633	ENSG00000143633	protein_coding	C1orf131	-1.57122	0.000520292
ENSG00000011143	ENSG00000011143	protein_coding	MKS1	-1.57131	0.00996385
ENSG00000185825	ENSG00000185825	protein_coding	BCAP31	-1.57146	0.0166523
ENSG00000119574	ENSG00000119574	protein_coding	ZBTB45	-1.57152	0.000482663
ENSG00000010361	ENSG00000010361	protein_coding	FUZ	-1.57165	0.0373675
ENSG00000274211	ENSG00000274211	protein_coding	SOCS7	-1.57255	0.00911325
ENSG00000100065	ENSG00000100065	protein_coding	CARD10	-1.57314	0.0167807
ENSG00000204568	ENSG00000204568	protein_coding	MRPS18B	-1.57392	0.00941483
ENSG00000112659	ENSG00000112659	protein_coding	CUL9	-1.5747	0.000830444
ENSG00000133195	ENSG00000133195	protein_coding	SLC39A11	-1.57541	0.00515055
ENSG00000119599	ENSG00000119599	protein_coding	DCAF4	-1.57543	0.0141419
ENSG00000039523	ENSG00000039523	protein_coding	RIPOR1	-1.57575	0.0329423
ENSG00000186281	ENSG00000186281	protein_coding	GPAT2	-1.57635	0.023374
ENSG00000128487	ENSG00000128487	protein_coding	SPECC1	-1.58008	0.00963651
ENSG00000171617	ENSG00000171617	protein_coding	ENC1	-1.58061	0.000987966
ENSG00000278535	ENSG00000278535	protein_coding	DHRS11	-1.5815	0.00372817
ENSG00000198466	ENSG00000198466	protein_coding	ZNF587	-1.58157	0.0298861
ENSG00000100027	ENSG00000100027	protein_coding	YPEL1	-1.58196	0.000432287
ENSG00000166136	ENSG00000166136	protein_coding	NDUFB8	-1.58229	0.0131758
ENSG00000101868	ENSG00000101868	protein_coding	POLA1	-1.58293	0.0149335
ENSG00000173928	ENSG00000173928	protein_coding	SWSAP1	-1.58302	0.0136237
ENSG00000165282	ENSG00000165282	protein_coding	PIGO	-1.58319	0.000983464
ENSG00000163867	ENSG00000163867	protein_coding	ZMYM6	-1.58342	0.00977836
ENSG00000256269	ENSG00000256269	protein_coding	HMBS	-1.58395	0.0118647
ENSG00000133627	ENSG00000133627	protein_coding	ACTR3B	-1.58737	0.0004241
ENSG00000006062	ENSG00000006062	protein_coding	MAP3K14	-1.58792	0.0171317
ENSG00000162769	ENSG00000162769	protein_coding	FLVCR1	-1.58887	0.0235306
ENSG00000184905	ENSG00000184905	protein_coding	TCEAL2	-1.58975	0.0407088
ENSG00000132801	ENSG00000132801	protein_coding	ZSWIM3	-1.59002	0.0177196
ENSG00000215375	ENSG00000215375	protein_coding	MYL5	-1.59021	0.00863028
ENSG00000106009	ENSG00000106009	protein_coding	BRAT1	-1.59096	0.000401964
ENSG00000205133	ENSG00000205133	protein_coding	TRIQK	-1.59227	0.026151
ENSG00000010292	ENSG00000010292	protein_coding	NCAPD2	-1.59326	0.0462027
ENSG00000184206	ENSG00000184206	protein_coding	GOLGA6L4	-1.59356	0.0298166
ENSG00000137700	ENSG00000137700	protein_coding	SLC37A4	-1.59461	0.0226436
ENSG00000113597	ENSG00000113597	protein_coding	TRAPPC13	-1.59504	0.0355794
ENSG00000215126	ENSG00000215126	protein_coding	CBWD6	-1.59603	0.0198293
ENSG00000163155	ENSG00000163155	protein_coding	LYSMD1	-1.59616	0.00137832
ENSG00000158079	ENSG00000158079	protein_coding	PTPDC1	-1.59681	0.024598
ENSG00000108828	ENSG00000108828	protein_coding	VAT1	-1.59737	0.0220846
ENSG00000133985	ENSG00000133985	protein_coding	TTC9	-1.59758	0.0120069
ENSG00000173275	ENSG00000173275	protein_coding	ZNF449	-1.59952	0.00500718
ENSG00000250067	ENSG00000250067	protein_coding	YJEFN3	-1.5998	0.000659579
ENSG00000099817	ENSG00000099817	protein_coding	POLR2E	-1.59996	0.0141468
ENSG00000125450	ENSG00000125450	protein_coding	NUP85	-1.60012	0.026316
ENSG00000160293	ENSG00000160293	protein_coding	VAV2	-1.60137	0.036558
ENSG00000044090	ENSG00000044090	protein_coding	CUL7	-1.60223	0.0131356
ENSG00000171953	ENSG00000171953	protein_coding	ATPAF2	-1.60264	0.00927707
ENSG00000106246	ENSG00000106246	protein_coding	PTCD1	-1.60297	0.0363596
ENSG00000134138	ENSG00000134138	protein_coding	MEIS2	-1.60308	0.00211867
ENSG00000143493	ENSG00000143493	protein_coding	INTS7	-1.60476	0.0237864
ENSG00000083814	ENSG00000083814	protein_coding	ZNF671	-1.60488	0.00174511
ENSG00000140682	ENSG00000140682	protein_coding	TGFB1I1	-1.60545	0.000624303
ENSG00000140807	ENSG00000140807	protein_coding	NKD1	-1.60633	0.0169112
ENSG00000112232	ENSG00000112232	protein_coding	KHDRBS2	-1.60681	0.0118356
ENSG00000029639	ENSG00000029639	protein_coding	TFB1M	-1.60706	0.0184846
ENSG00000205084	ENSG00000205084	protein_coding	TMEM231	-1.60793	0.00507092
ENSG00000156735	ENSG00000156735	protein_coding	BAG4	-1.60805	0.0378521
ENSG00000130204	ENSG00000130204	protein_coding	TOMM40	-1.60844	0.0179173
ENSG00000080819	ENSG00000080819	protein_coding	CPOX	-1.60889	0.0141087
ENSG00000186130	ENSG00000186130	protein_coding	ZBTB6	-1.60929	0.0331445
ENSG00000197077	ENSG00000197077	protein_coding	KIAA1671	-1.61193	0.0191678
ENSG00000285188	ENSG00000285188	protein_coding	AC008397.2	-1.61459	0.0202892
ENSG00000149476	ENSG00000149476	protein_coding	TKFC	-1.61484	0.0325349
ENSG00000137343	ENSG00000137343	protein_coding	ATAT1	-1.61498	0.0319995
ENSG00000258429	ENSG00000258429	protein_coding	PDF	-1.615	0.000390762
ENSG00000104218	ENSG00000104218	protein_coding	CSPP1	-1.6159	0.0186165
ENSG00000126653	ENSG00000126653	protein_coding	NSRP1	-1.61792	0.0405453
ENSG00000120925	ENSG00000120925	protein_coding	RNF170	-1.61884	0.00131556
ENSG00000144231	ENSG00000144231	protein_coding	POLR2D	-1.62131	0.0273239
ENSG00000100263	ENSG00000100263	protein_coding	RHBDD3	-1.62164	0.00583739
ENSG00000187118	ENSG00000187118	protein_coding	CMC1	-1.62249	0.0134892
ENSG00000189007	ENSG00000189007	protein_coding	ADAT2	-1.62306	0.00421447
ENSG00000235109	ENSG00000235109	protein_coding	ZSCAN31	-1.62427	0.000944991
ENSG00000158555	ENSG00000158555	protein_coding	GDPD5	-1.62498	0.0192599
ENSG00000179981	ENSG00000179981	protein_coding	TSHZ1	-1.62536	0.00820512
ENSG00000253710	ENSG00000253710	protein_coding	ALG11	-1.62552	0.0143883
ENSG00000255154	ENSG00000255154	protein_coding	HTD2	-1.62605	0.0365226
ENSG00000123415	ENSG00000123415	protein_coding	SMUG1	-1.62619	0.0165079
ENSG00000133111	ENSG00000133111	protein_coding	RFXAP	-1.62737	0.0470738
ENSG00000166387	ENSG00000166387	protein_coding	PPFIBP2	-1.62784	0.000983517
ENSG00000008952	ENSG00000008952	protein_coding	SEC62	-1.62813	0.0424376
ENSG00000197943	ENSG00000197943	protein_coding	PLCG2	-1.62829	0.00483443
ENSG00000176155	ENSG00000176155	protein_coding	CCDC57	-1.62863	0.000390066
ENSG00000168306	ENSG00000168306	protein_coding	ACOX2	-1.62927	0.047736
ENSG00000187257	ENSG00000187257	protein_coding	RSBN1L	-1.62975	0.0156169
ENSG00000139263	ENSG00000139263	protein_coding	LRIG3	-1.63044	0.00468753
ENSG00000120733	ENSG00000120733	protein_coding	KDM3B	-1.63079	0.0302551
ENSG00000101546	ENSG00000101546	protein_coding	RBFA	-1.63087	0.000498295
ENSG00000172819	ENSG00000172819	protein_coding	RARG	-1.63163	0.0455844
ENSG00000113141	ENSG00000113141	protein_coding	IK	-1.63218	0.0261583
ENSG00000100888	ENSG00000100888	protein_coding	CHD8	-1.63218	0.0363801
ENSG00000134247	ENSG00000134247	protein_coding	PTGFRN	-1.63224	0.00649772
ENSG00000153107	ENSG00000153107	protein_coding	ANAPC1	-1.63282	0.0395636
ENSG00000136856	ENSG00000136856	protein_coding	SLC2A8	-1.63511	0.0457321
ENSG00000175063	ENSG00000175063	protein_coding	UBE2C	-1.63683	0.0189053
ENSG00000204444	ENSG00000204444	protein_coding	APOM	-1.63699	0.00392172
ENSG00000156030	ENSG00000156030	protein_coding	ELMSAN1	-1.63747	0.000589676
ENSG00000151208	ENSG00000151208	protein_coding	DLG5	-1.63795	0.00275087
ENSG00000088970	ENSG00000088970	protein_coding	KIZ	-1.64003	0.0178248
ENSG00000152767	ENSG00000152767	protein_coding	FARP1	-1.64042	0.0128249
ENSG00000108349	ENSG00000108349	protein_coding	CASC3	-1.64187	0.043197
ENSG00000171467	ENSG00000171467	protein_coding	ZNF318	-1.64246	0.0194423
ENSG00000185652	ENSG00000185652	protein_coding	NTF3	-1.64252	0.000989668
ENSG00000145241	ENSG00000145241	protein_coding	CENPC	-1.64317	0.00207804
ENSG00000213523	ENSG00000213523	protein_coding	SRA1	-1.64415	0.0127442
ENSG00000188130	ENSG00000188130	protein_coding	MAPK12	-1.64487	0.0192437
ENSG00000181090	ENSG00000181090	protein_coding	EHMT1	-1.64696	0.00392053
ENSG00000141030	ENSG00000141030	protein_coding	COPS3	-1.64746	0.0462456
ENSG00000111325	ENSG00000111325	protein_coding	OGFOD2	-1.64831	0.000512409
ENSG00000180917	ENSG00000180917	protein_coding	CMTR2	-1.64907	0.0493432
ENSG00000111667	ENSG00000111667	protein_coding	USP5	-1.64944	0.0284093
ENSG00000154310	ENSG00000154310	protein_coding	TNIK	-1.65014	0.0243208
ENSG00000183762	ENSG00000183762	protein_coding	KREMEN1	-1.65073	0.0466841
ENSG00000092201	ENSG00000092201	protein_coding	SUPT16H	-1.65106	0.049799
ENSG00000145439	ENSG00000145439	protein_coding	CBR4	-1.65267	0.00286027
ENSG00000132781	ENSG00000132781	protein_coding	MUTYH	-1.6527	0.0239547
ENSG00000150687	ENSG00000150687	protein_coding	PRSS23	-1.65304	0.0039198
ENSG00000164077	ENSG00000164077	protein_coding	MON1A	-1.6535	0.00107652
ENSG00000139625	ENSG00000139625	protein_coding	MAP3K12	-1.6545	0.0344108
ENSG00000164010	ENSG00000164010	protein_coding	ERMAP	-1.65515	0.00141616
ENSG00000110063	ENSG00000110063	protein_coding	DCPS	-1.65559	0.000363528
ENSG00000020922	ENSG00000020922	protein_coding	MRE11	-1.65566	0.000936649
ENSG00000101849	ENSG00000101849	protein_coding	TBL1X	-1.65568	0.0354174
ENSG00000100105	ENSG00000100105	protein_coding	PATZ1	-1.65746	0.026192
ENSG00000092847	ENSG00000092847	protein_coding	AGO1	-1.65793	0.00654011
ENSG00000180879	ENSG00000180879	protein_coding	SSR4	-1.65797	0.0159474
ENSG00000149639	ENSG00000149639	protein_coding	SOGA1	-1.65852	0.0187396
ENSG00000175575	ENSG00000175575	protein_coding	PAAF1	-1.65881	0.00658247
ENSG00000164574	ENSG00000164574	protein_coding	GALNT10	-1.65972	0.0254246
ENSG00000130731	ENSG00000130731	protein_coding	METTL26	-1.65985	0.0259334
ENSG00000048540	ENSG00000048540	protein_coding	LMO3	-1.66125	0.00913437
ENSG00000161896	ENSG00000161896	protein_coding	IP6K3	-1.66229	0.000420139
ENSG00000186448	ENSG00000186448	protein_coding	ZNF197	-1.66232	0.00553707
ENSG00000186654	ENSG00000186654	protein_coding	PRR5	-1.66269	0.0155161
ENSG00000169919	ENSG00000169919	protein_coding	GUSB	-1.66319	0.011796
ENSG00000033170	ENSG00000033170	protein_coding	FUT8	-1.66351	0.00525366
ENSG00000203797	ENSG00000203797	protein_coding	DDO	-1.66436	0.007368
ENSG00000018408	ENSG00000018408	protein_coding	WWTR1	-1.66494	0.0104744
ENSG00000105810	ENSG00000105810	protein_coding	CDK6	-1.66741	0.0404108
ENSG00000174600	ENSG00000174600	protein_coding	CMKLR1	-1.66798	0.00786505
ENSG00000126705	ENSG00000126705	protein_coding	AHDC1	-1.66835	0.00150596
ENSG00000138613	ENSG00000138613	protein_coding	APH1B	-1.66837	0.0375388
ENSG00000067365	ENSG00000067365	protein_coding	METTL22	-1.66843	0.00559465
ENSG00000164296	ENSG00000164296	protein_coding	TIGD6	-1.67088	0.000429438
ENSG00000150433	ENSG00000150433	protein_coding	TMEM218	-1.67179	0.000428837
ENSG00000126432	ENSG00000126432	protein_coding	PRDX5	-1.67329	0.010495
ENSG00000164068	ENSG00000164068	protein_coding	RNF123	-1.6736	0.0105697
ENSG00000117632	ENSG00000117632	protein_coding	STMN1	-1.6741	0.00362289
ENSG00000160307	ENSG00000160307	protein_coding	S100B	-1.67464	0.0107417
ENSG00000143443	ENSG00000143443	protein_coding	C1orf56	-1.67517	0.000360832
ENSG00000108578	ENSG00000108578	protein_coding	BLMH	-1.67522	0.00928843
ENSG00000138381	ENSG00000138381	protein_coding	ASNSD1	-1.67612	0.026555
ENSG00000167625	ENSG00000167625	protein_coding	ZNF526	-1.67615	0.0272299
ENSG00000205903	ENSG00000205903	protein_coding	ZNF316	-1.67704	0.00768297
ENSG00000178921	ENSG00000178921	protein_coding	PFAS	-1.67715	0.00897166
ENSG00000163710	ENSG00000163710	protein_coding	PCOLCE2	-1.67809	0.0155775
ENSG00000162639	ENSG00000162639	protein_coding	HENMT1	-1.67829	0.000664873
ENSG00000146021	ENSG00000146021	protein_coding	KLHL3	-1.6785	0.0152994
ENSG00000170677	ENSG00000170677	protein_coding	SOCS6	-1.67864	0.0477545
ENSG00000092929	ENSG00000092929	protein_coding	UNC13D	-1.67887	0.0175256
ENSG00000129824	ENSG00000129824	protein_coding	RPS4Y1	-1.6789	0.0122582
ENSG00000007047	ENSG00000007047	protein_coding	MARK4	-1.67911	0.026042
ENSG00000120868	ENSG00000120868	protein_coding	APAF1	-1.6802	0.00770342
ENSG00000124839	ENSG00000124839	protein_coding	RAB17	-1.68027	0.0126012
ENSG00000065978	ENSG00000065978	protein_coding	YBX1	-1.6806	0.00234537
ENSG00000171408	ENSG00000171408	protein_coding	PDE7B	-1.6817	0.0186198
ENSG00000196998	ENSG00000196998	protein_coding	WDR45	-1.68242	0.0153731
ENSG00000188321	ENSG00000188321	protein_coding	ZNF559	-1.68303	0.0340709
ENSG00000134882	ENSG00000134882	protein_coding	UBAC2	-1.68333	0.0478028
ENSG00000064933	ENSG00000064933	protein_coding	PMS1	-1.68341	0.000344959
ENSG00000126934	ENSG00000126934	protein_coding	MAP2K2	-1.6836	0.00814912
ENSG00000139182	ENSG00000139182	protein_coding	CLSTN3	-1.68419	0.0139532
ENSG00000176533	ENSG00000176533	protein_coding	GNG7	-1.68728	0.00152888
ENSG00000013392	ENSG00000013392	protein_coding	RWDD2A	-1.68774	0.0152578
ENSG00000175691	ENSG00000175691	protein_coding	ZNF77	-1.68917	0.0181816
ENSG00000155100	ENSG00000155100	protein_coding	OTUD6B	-1.69033	0.00554887
ENSG00000100097	ENSG00000100097	protein_coding	LGALS1	-1.69096	0.0389996
ENSG00000132793	ENSG00000132793	protein_coding	LPIN3	-1.69133	0.00541512
ENSG00000083544	ENSG00000083544	protein_coding	TDRD3	-1.69169	0.0246412
ENSG00000174165	ENSG00000174165	protein_coding	ZDHHC24	-1.69219	0.00326249
ENSG00000074755	ENSG00000074755	protein_coding	ZZEF1	-1.69306	0.0206298
ENSG00000088899	ENSG00000088899	protein_coding	LZTS3	-1.69358	0.0139417
ENSG00000049245	ENSG00000049245	protein_coding	VAMP3	-1.69767	0.00281832
ENSG00000134245	ENSG00000134245	protein_coding	WNT2B	-1.69856	0.000382418
ENSG00000146733	ENSG00000146733	protein_coding	PSPH	-1.69862	0.00912213
ENSG00000134817	ENSG00000134817	protein_coding	APLNR	-1.69869	0.041114
ENSG00000012232	ENSG00000012232	protein_coding	EXTL3	-1.6989	0.0137192
ENSG00000182240	ENSG00000182240	protein_coding	BACE2	-1.70086	0.0184293
ENSG00000142599	ENSG00000142599	protein_coding	RERE	-1.7013	0.0334648
ENSG00000129245	ENSG00000129245	protein_coding	FXR2	-1.70131	0.0395366
ENSG00000075826	ENSG00000075826	protein_coding	SEC31B	-1.70231	0.0031158
ENSG00000140368	ENSG00000140368	protein_coding	PSTPIP1	-1.703	0.00760198
ENSG00000148426	ENSG00000148426	protein_coding	PROSER2	-1.70323	0.0175854
ENSG00000104983	ENSG00000104983	protein_coding	CCDC61	-1.70386	0.000331569
ENSG00000178188	ENSG00000178188	protein_coding	SH2B1	-1.70402	0.0124749
ENSG00000054654	ENSG00000054654	protein_coding	SYNE2	-1.705	0.0370618
ENSG00000137074	ENSG00000137074	protein_coding	APTX	-1.70517	0.00596661
ENSG00000181027	ENSG00000181027	protein_coding	FKRP	-1.70553	0.0189771
ENSG00000179387	ENSG00000179387	protein_coding	ELMOD2	-1.70644	0.000333169
ENSG00000163482	ENSG00000163482	protein_coding	STK36	-1.70701	0.00255246
ENSG00000119723	ENSG00000119723	protein_coding	COQ6	-1.70737	0.00118894
ENSG00000142556	ENSG00000142556	protein_coding	ZNF614	-1.70799	0.0197078
ENSG00000163517	ENSG00000163517	protein_coding	HDAC11	-1.7081	0.0292582
ENSG00000149557	ENSG00000149557	protein_coding	FEZ1	-1.7089	0.0350462
ENSG00000119041	ENSG00000119041	protein_coding	GTF3C3	-1.70915	0.0316363
ENSG00000054282	ENSG00000054282	protein_coding	SDCCAG8	-1.70924	0.0329679
ENSG00000169972	ENSG00000169972	protein_coding	PUSL1	-1.70988	0.0491067
ENSG00000006740	ENSG00000006740	protein_coding	ARHGAP44	-1.71077	0.000639581
ENSG00000142541	ENSG00000142541	protein_coding	RPL13A	-1.71123	0.00330057
ENSG00000071564	ENSG00000071564	protein_coding	TCF3	-1.71205	0.00702515
ENSG00000172197	ENSG00000172197	protein_coding	MBOAT1	-1.71235	0.0120063
ENSG00000145147	ENSG00000145147	protein_coding	SLIT2	-1.71255	0.00140534
ENSG00000155465	ENSG00000155465	protein_coding	SLC7A7	-1.71299	0.00206999
ENSG00000115085	ENSG00000115085	protein_coding	ZAP70	-1.71354	0.044982
ENSG00000117569	ENSG00000117569	protein_coding	PTBP2	-1.71364	0.00423484
ENSG00000176834	ENSG00000176834	protein_coding	VSIG10	-1.71539	0.00944392
ENSG00000178982	ENSG00000178982	protein_coding	EIF3K	-1.71542	0.0213861
ENSG00000110046	ENSG00000110046	protein_coding	ATG2A	-1.71565	0.0191187
ENSG00000146909	ENSG00000146909	protein_coding	NOM1	-1.71697	0.0401114
ENSG00000196367	ENSG00000196367	protein_coding	TRRAP	-1.71757	0.0301089
ENSG00000205978	ENSG00000205978	protein_coding	NYNRIN	-1.71861	0.0179779
ENSG00000221909	ENSG00000221909	protein_coding	FAM200A	-1.71861	0.0208288
ENSG00000111412	ENSG00000111412	protein_coding	C12orf49	-1.71862	0.0011741
ENSG00000170085	ENSG00000170085	protein_coding	SIMC1	-1.71867	0.0203445
ENSG00000108592	ENSG00000108592	protein_coding	FTSJ3	-1.71917	0.0283991
ENSG00000131730	ENSG00000131730	protein_coding	CKMT2	-1.71962	0.000586878
ENSG00000151881	ENSG00000151881	protein_coding	TMEM267	-1.71987	0.000449706
ENSG00000111962	ENSG00000111962	protein_coding	UST	-1.72061	0.00153186
ENSG00000116459	ENSG00000116459	protein_coding	ATP5PB	-1.72104	0.0314382
ENSG00000142798	ENSG00000142798	protein_coding	HSPG2	-1.72106	0.0237303
ENSG00000138111	ENSG00000138111	protein_coding	MFSD13A	-1.72123	0.000353115
ENSG00000083457	ENSG00000083457	protein_coding	ITGAE	-1.72145	0.00433718
ENSG00000110422	ENSG00000110422	protein_coding	HIPK3	-1.72216	0.029316
ENSG00000259494	ENSG00000259494	protein_coding	MRPL46	-1.72241	0.0402138
ENSG00000110090	ENSG00000110090	protein_coding	CPT1A	-1.72319	0.00454896
ENSG00000100241	ENSG00000100241	protein_coding	SBF1	-1.72405	0.0262048
ENSG00000197892	ENSG00000197892	protein_coding	KIF13B	-1.72468	0.00554069
ENSG00000118777	ENSG00000118777	protein_coding	ABCG2	-1.72489	0.0409206
ENSG00000198832	ENSG00000198832	protein_coding	SELENOM	-1.72558	0.00552736
ENSG00000137171	ENSG00000137171	protein_coding	KLC4	-1.72588	0.00044755
ENSG00000115239	ENSG00000115239	protein_coding	ASB3	-1.72614	0.0196529
ENSG00000177946	ENSG00000177946	protein_coding	CENPBD1	-1.7264	0.00070078
ENSG00000135063	ENSG00000135063	protein_coding	FAM189A2	-1.72746	0.00209823
ENSG00000164494	ENSG00000164494	protein_coding	PDSS2	-1.72862	0.00368956
ENSG00000175220	ENSG00000175220	protein_coding	ARHGAP1	-1.72917	0.0336313
ENSG00000243335	ENSG00000243335	protein_coding	KCTD7	-1.72949	0.0116376
ENSG00000224470	ENSG00000224470	protein_coding	ATXN1L	-1.72983	0.02667
ENSG00000104356	ENSG00000104356	protein_coding	POP1	-1.73024	0.0374155
ENSG00000170412	ENSG00000170412	protein_coding	GPRC5C	-1.73033	0.0140861
ENSG00000011114	ENSG00000011114	protein_coding	BTBD7	-1.73036	0.0311755
ENSG00000140876	ENSG00000140876	protein_coding	NUDT7	-1.73095	0.0333872
ENSG00000122417	ENSG00000122417	protein_coding	ODF2L	-1.73371	0.0352668
ENSG00000137824	ENSG00000137824	protein_coding	RMDN3	-1.73435	0.00275754
ENSG00000161036	ENSG00000161036	protein_coding	LRWD1	-1.73581	0.0103869
ENSG00000032219	ENSG00000032219	protein_coding	ARID4A	-1.73599	0.0195485
ENSG00000147576	ENSG00000147576	protein_coding	ADHFE1	-1.73615	0.0412071
ENSG00000007129	ENSG00000007129	protein_coding	CEACAM21	-1.73628	0.00159091
ENSG00000185361	ENSG00000185361	protein_coding	TNFAIP8L1	-1.73719	0.0461416
ENSG00000107077	ENSG00000107077	protein_coding	KDM4C	-1.73733	0.0203153
ENSG00000181396	ENSG00000181396	protein_coding	OGFOD3	-1.73949	0.0370548
ENSG00000203896	ENSG00000203896	protein_coding	LIME1	-1.74034	0.00147358
ENSG00000273590	ENSG00000273590	protein_coding	SMIM11B	-1.74316	0.0380492
ENSG00000093183	ENSG00000093183	protein_coding	SEC22C	-1.74328	0.00903326
ENSG00000096872	ENSG00000096872	protein_coding	IFT74	-1.74485	0.013165
ENSG00000078699	ENSG00000078699	protein_coding	CBFA2T2	-1.74505	0.0260743
ENSG00000197050	ENSG00000197050	protein_coding	ZNF420	-1.74577	0.00304296
ENSG00000057935	ENSG00000057935	protein_coding	MTA3	-1.74711	0.00127975
ENSG00000165813	ENSG00000165813	protein_coding	CCDC186	-1.74795	0.0209897
ENSG00000177548	ENSG00000177548	protein_coding	RABEP2	-1.7481	0.00203898
ENSG00000126214	ENSG00000126214	protein_coding	KLC1	-1.7481	0.0340439
ENSG00000188997	ENSG00000188997	protein_coding	KCTD21	-1.74881	0.0270546
ENSG00000196498	ENSG00000196498	protein_coding	NCOR2	-1.74896	0.0273895
ENSG00000170445	ENSG00000170445	protein_coding	HARS1	-1.75003	0.0143917
ENSG00000204536	ENSG00000204536	protein_coding	CCHCR1	-1.75065	0.00406693
ENSG00000172888	ENSG00000172888	protein_coding	ZNF621	-1.75117	0.010967
ENSG00000225697	ENSG00000225697	protein_coding	SLC26A6	-1.75135	0.0178249
ENSG00000179476	ENSG00000179476	protein_coding	C14orf28	-1.7527	0.00183968
ENSG00000185437	ENSG00000185437	protein_coding	SH3BGR	-1.75394	0.00573583
ENSG00000088812	ENSG00000088812	protein_coding	ATRN	-1.75402	0.0203496
ENSG00000248098	ENSG00000248098	protein_coding	BCKDHA	-1.75588	0.0280858
ENSG00000023516	ENSG00000023516	protein_coding	AKAP11	-1.75623	0.0016662
ENSG00000163918	ENSG00000163918	protein_coding	RFC4	-1.75741	0.0103629
ENSG00000115947	ENSG00000115947	protein_coding	ORC4	-1.76125	0.0103398
ENSG00000011243	ENSG00000011243	protein_coding	AKAP8L	-1.76138	0.0190478
ENSG00000162738	ENSG00000162738	protein_coding	VANGL2	-1.7617	0.0256703
ENSG00000198517	ENSG00000198517	protein_coding	MAFK	-1.76466	0.018544
ENSG00000145431	ENSG00000145431	protein_coding	PDGFC	-1.76484	0.000405997
ENSG00000162878	ENSG00000162878	protein_coding	PKDCC	-1.76547	0.00179641
ENSG00000243708	ENSG00000243708	protein_coding	PLA2G4B	-1.76554	0.00758335
ENSG00000122406	ENSG00000122406	protein_coding	RPL5	-1.76578	0.0155129
ENSG00000138078	ENSG00000138078	protein_coding	PREPL	-1.76653	0.0329082
ENSG00000155729	ENSG00000155729	protein_coding	KCTD18	-1.76736	0.000603112
ENSG00000166888	ENSG00000166888	protein_coding	STAT6	-1.76767	0.0389458
ENSG00000224383	ENSG00000224383	protein_coding	PRR29	-1.76864	0.0296398
ENSG00000164136	ENSG00000164136	protein_coding	IL15	-1.76928	0.000299839
ENSG00000106617	ENSG00000106617	protein_coding	PRKAG2	-1.77195	0.0401042
ENSG00000126461	ENSG00000126461	protein_coding	SCAF1	-1.7721	0.017158
ENSG00000116741	ENSG00000116741	protein_coding	RGS2	-1.77227	0.00208299
ENSG00000140471	ENSG00000140471	protein_coding	LINS1	-1.77359	0.00104284
ENSG00000099337	ENSG00000099337	protein_coding	KCNK6	-1.77393	0.00125406
ENSG00000053900	ENSG00000053900	protein_coding	ANAPC4	-1.77508	0.0327825
ENSG00000166997	ENSG00000166997	protein_coding	CNPY4	-1.7754	0.0315704
ENSG00000075539	ENSG00000075539	protein_coding	FRYL	-1.7763	0.030563
ENSG00000108298	ENSG00000108298	protein_coding	RPL19	-1.77667	0.00697936
ENSG00000153933	ENSG00000153933	protein_coding	DGKE	-1.77675	0.0138403
ENSG00000118194	ENSG00000118194	protein_coding	TNNT2	-1.77798	0.0117451
ENSG00000242612	ENSG00000242612	protein_coding	DECR2	-1.77816	0.0489616
ENSG00000135709	ENSG00000135709	protein_coding	KIAA0513	-1.77833	0.000300382
ENSG00000099956	ENSG00000099956	protein_coding	SMARCB1	-1.77852	0.00142823
ENSG00000126775	ENSG00000126775	protein_coding	ATG14	-1.77869	0.000416255
ENSG00000183684	ENSG00000183684	protein_coding	ALYREF	-1.77887	0.00686376
ENSG00000198945	ENSG00000198945	protein_coding	L3MBTL3	-1.77994	0.0105836
ENSG00000151665	ENSG00000151665	protein_coding	PIGF	-1.78057	0.0121786
ENSG00000126785	ENSG00000126785	protein_coding	RHOJ	-1.78088	0.00241608
ENSG00000204604	ENSG00000204604	protein_coding	ZNF468	-1.78118	0.0384485
ENSG00000162804	ENSG00000162804	protein_coding	SNED1	-1.78126	0.0302132
ENSG00000149300	ENSG00000149300	protein_coding	C11orf52	-1.78157	0.00396129
ENSG00000196214	ENSG00000196214	protein_coding	ZNF766	-1.78159	0.00095844
ENSG00000185658	ENSG00000185658	protein_coding	BRWD1	-1.78264	0.047125
ENSG00000130818	ENSG00000130818	protein_coding	ZNF426	-1.7834	0.000519691
ENSG00000101247	ENSG00000101247	protein_coding	NDUFAF5	-1.78408	0.0059385
ENSG00000196405	ENSG00000196405	protein_coding	EVL	-1.78419	0.0323522
ENSG00000144401	ENSG00000144401	protein_coding	METTL21A	-1.78583	0.0206446
ENSG00000140694	ENSG00000140694	protein_coding	PARN	-1.78628	0.00768036
ENSG00000154144	ENSG00000154144	protein_coding	TBRG1	-1.78658	0.0471404
ENSG00000072736	ENSG00000072736	protein_coding	NFATC3	-1.78723	0.00902966
ENSG00000084090	ENSG00000084090	protein_coding	STARD7	-1.78731	0.000969654
ENSG00000184939	ENSG00000184939	protein_coding	ZFP90	-1.7881	0.00122134
ENSG00000071626	ENSG00000071626	protein_coding	DAZAP1	-1.78854	0.0353093
ENSG00000125743	ENSG00000125743	protein_coding	SNRPD2	-1.78894	0.0308566
ENSG00000125744	ENSG00000125744	protein_coding	RTN2	-1.78919	0.00495215
ENSG00000153936	ENSG00000153936	protein_coding	HS2ST1	-1.78937	0.00672746
ENSG00000138092	ENSG00000138092	protein_coding	CENPO	-1.79159	0.0307867
ENSG00000136925	ENSG00000136925	protein_coding	TSTD2	-1.79267	0.0328068
ENSG00000168237	ENSG00000168237	protein_coding	GLYCTK	-1.79288	0.00181949
ENSG00000147604	ENSG00000147604	protein_coding	RPL7	-1.79297	0.0144493
ENSG00000235106	ENSG00000235106	protein_coding	BRD3OS	-1.79317	0.0178566
ENSG00000203880	ENSG00000203880	protein_coding	PCMTD2	-1.79408	0.0143374
ENSG00000141756	ENSG00000141756	protein_coding	FKBP10	-1.79474	0.0111581
ENSG00000245680	ENSG00000245680	protein_coding	ZNF585B	-1.79675	0.00303126
ENSG00000165792	ENSG00000165792	protein_coding	METTL17	-1.79678	0.016256
ENSG00000169727	ENSG00000169727	protein_coding	GPS1	-1.79719	0.00255233
ENSG00000174917	ENSG00000174917	protein_coding	MICOS13	-1.79855	0.0063332
ENSG00000140265	ENSG00000140265	protein_coding	ZSCAN29	-1.79886	0.0156237
ENSG00000163125	ENSG00000163125	protein_coding	RPRD2	-1.80034	0.0191763
ENSG00000277149	ENSG00000277149	protein_coding	TYW1B	-1.80069	0.0241657
ENSG00000163702	ENSG00000163702	protein_coding	IL17RC	-1.80069	0.013046
ENSG00000165675	ENSG00000165675	protein_coding	ENOX2	-1.80098	0.00175926
ENSG00000047230	ENSG00000047230	protein_coding	CTPS2	-1.80122	0.00450323
ENSG00000185019	ENSG00000185019	protein_coding	UBOX5	-1.80238	0.00630212
ENSG00000169189	ENSG00000169189	protein_coding	NSMCE1	-1.80248	0.00934071
ENSG00000169951	ENSG00000169951	protein_coding	ZNF764	-1.80319	0.00446381
ENSG00000110987	ENSG00000110987	protein_coding	BCL7A	-1.80387	0.0441973
ENSG00000113360	ENSG00000113360	protein_coding	DROSHA	-1.80413	0.0284745
ENSG00000179832	ENSG00000179832	protein_coding	MROH1	-1.80467	0.028713
ENSG00000134508	ENSG00000134508	protein_coding	CABLES1	-1.80477	0.00175885
ENSG00000143198	ENSG00000143198	protein_coding	MGST3	-1.80599	0.0438784
ENSG00000162595	ENSG00000162595	protein_coding	DIRAS3	-1.80687	0.000611999
ENSG00000178952	ENSG00000178952	protein_coding	TUFM	-1.80729	0.00675349
ENSG00000108352	ENSG00000108352	protein_coding	RAPGEFL1	-1.80744	0.044699
ENSG00000153767	ENSG00000153767	protein_coding	GTF2E1	-1.80837	0.00507545
ENSG00000174306	ENSG00000174306	protein_coding	ZHX3	-1.81165	0.0129622
ENSG00000135521	ENSG00000135521	protein_coding	LTV1	-1.81191	0.0397227
ENSG00000286905	ENSG00000286905	protein_coding	AC108488.2	-1.81193	0.0381967
ENSG00000140521	ENSG00000140521	protein_coding	POLG	-1.81235	0.0323307
ENSG00000083817	ENSG00000083817	protein_coding	ZNF416	-1.81272	0.0109963
ENSG00000158526	ENSG00000158526	protein_coding	TSR2	-1.81282	0.0187842
ENSG00000001461	ENSG00000001461	protein_coding	NIPAL3	-1.81418	0.000805942
ENSG00000188315	ENSG00000188315	protein_coding	C3orf62	-1.81549	0.0044537
ENSG00000124608	ENSG00000124608	protein_coding	AARS2	-1.81667	0.00134288
ENSG00000104863	ENSG00000104863	protein_coding	LIN7B	-1.81758	0.00484985
ENSG00000198931	ENSG00000198931	protein_coding	APRT	-1.8182	0.0013774
ENSG00000164830	ENSG00000164830	protein_coding	OXR1	-1.81864	0.0173437
ENSG00000038002	ENSG00000038002	protein_coding	AGA	-1.81968	0.0230162
ENSG00000129749	ENSG00000129749	protein_coding	CHRNA10	-1.82052	0.00911165
ENSG00000100030	ENSG00000100030	protein_coding	MAPK1	-1.82205	0.0285087
ENSG00000109572	ENSG00000109572	protein_coding	CLCN3	-1.82216	0.0262929
ENSG00000174444	ENSG00000174444	protein_coding	RPL4	-1.82234	0.0103002
ENSG00000053918	ENSG00000053918	protein_coding	KCNQ1	-1.82251	0.0005021
ENSG00000132031	ENSG00000132031	protein_coding	MATN3	-1.82283	0.0103375
ENSG00000109685	ENSG00000109685	protein_coding	NSD2	-1.82528	0.0451007
ENSG00000163762	ENSG00000163762	protein_coding	TM4SF18	-1.8262	0.0473112
ENSG00000124164	ENSG00000124164	protein_coding	VAPB	-1.82627	0.0220117
ENSG00000120725	ENSG00000120725	protein_coding	SIL1	-1.8264	0.0419838
ENSG00000116353	ENSG00000116353	protein_coding	MECR	-1.82651	0.0344345
ENSG00000164880	ENSG00000164880	protein_coding	INTS1	-1.82669	0.00082287
ENSG00000138162	ENSG00000138162	protein_coding	TACC2	-1.82797	0.0227898
ENSG00000100068	ENSG00000100068	protein_coding	LRP5L	-1.82819	0.0434424
ENSG00000118873	ENSG00000118873	protein_coding	RAB3GAP2	-1.82822	0.0451941
ENSG00000177628	ENSG00000177628	protein_coding	GBA	-1.82896	0.0107398
ENSG00000135437	ENSG00000135437	protein_coding	RDH5	-1.8308	0.00498672
ENSG00000160767	ENSG00000160767	protein_coding	FAM189B	-1.83153	0.00326142
ENSG00000197841	ENSG00000197841	protein_coding	ZNF181	-1.83208	0.0124136
ENSG00000197355	ENSG00000197355	protein_coding	UAP1L1	-1.83224	0.0238286
ENSG00000076321	ENSG00000076321	protein_coding	KLHL20	-1.83259	0.0443411
ENSG00000088881	ENSG00000088881	protein_coding	EBF4	-1.83326	0.00136716
ENSG00000197912	ENSG00000197912	protein_coding	SPG7	-1.83408	0.00138634
ENSG00000172273	ENSG00000172273	protein_coding	HINFP	-1.83438	0.00622944
ENSG00000180616	ENSG00000180616	protein_coding	SSTR2	-1.83474	0.0118037
ENSG00000123064	ENSG00000123064	protein_coding	DDX54	-1.83496	0.0198734
ENSG00000161281	ENSG00000161281	protein_coding	COX7A1	-1.83513	0.0444288
ENSG00000124523	ENSG00000124523	protein_coding	SIRT5	-1.83513	0.0260774
ENSG00000132535	ENSG00000132535	protein_coding	DLG4	-1.83554	0.000570931
ENSG00000114446	ENSG00000114446	protein_coding	IFT57	-1.83662	0.0213735
ENSG00000158301	ENSG00000158301	protein_coding	GPRASP2	-1.83733	0.00667996
ENSG00000102710	ENSG00000102710	protein_coding	SUPT20H	-1.83802	0.0246332
ENSG00000119401	ENSG00000119401	protein_coding	TRIM32	-1.83821	0.0098471
ENSG00000274180	ENSG00000274180	protein_coding	NATD1	-1.83878	0.000270911
ENSG00000024422	ENSG00000024422	protein_coding	EHD2	-1.83902	0.0147827
ENSG00000007264	ENSG00000007264	protein_coding	MATK	-1.83903	0.00240236
ENSG00000107242	ENSG00000107242	protein_coding	PIP5K1B	-1.84036	0.000645595
ENSG00000115459	ENSG00000115459	protein_coding	ELMOD3	-1.84043	0.00627744
ENSG00000100038	ENSG00000100038	protein_coding	TOP3B	-1.84068	0.00121598
ENSG00000149679	ENSG00000149679	protein_coding	CABLES2	-1.841	0.00455368
ENSG00000173011	ENSG00000173011	protein_coding	TADA2B	-1.84118	0.0358087
ENSG00000111785	ENSG00000111785	protein_coding	RIC8B	-1.84184	0.00951089
ENSG00000134030	ENSG00000134030	protein_coding	CTIF	-1.84267	0.0257909
ENSG00000112365	ENSG00000112365	protein_coding	ZBTB24	-1.84355	0.0124151
ENSG00000147206	ENSG00000147206	protein_coding	NXF3	-1.84366	0.0169973
ENSG00000174032	ENSG00000174032	protein_coding	SLC25A30	-1.84402	0.00135247
ENSG00000009830	ENSG00000009830	protein_coding	POMT2	-1.84427	0.016575
ENSG00000137145	ENSG00000137145	protein_coding	DENND4C	-1.84461	0.0235061
ENSG00000107036	ENSG00000107036	protein_coding	RIC1	-1.84483	0.0413432
ENSG00000173638	ENSG00000173638	protein_coding	SLC19A1	-1.84511	0.0109786
ENSG00000135736	ENSG00000135736	protein_coding	CCDC102A	-1.84588	0.0348363
ENSG00000110888	ENSG00000110888	protein_coding	CAPRIN2	-1.84607	0.0083271
ENSG00000063127	ENSG00000063127	protein_coding	SLC6A16	-1.84615	0.011371
ENSG00000154127	ENSG00000154127	protein_coding	UBASH3B	-1.84652	0.0418791
ENSG00000165156	ENSG00000165156	protein_coding	ZHX1	-1.84657	0.0274262
ENSG00000154370	ENSG00000154370	protein_coding	TRIM11	-1.84674	0.00576843
ENSG00000165699	ENSG00000165699	protein_coding	TSC1	-1.84746	0.018505
ENSG00000143373	ENSG00000143373	protein_coding	ZNF687	-1.84746	0.00667407
ENSG00000105122	ENSG00000105122	protein_coding	RASAL3	-1.85068	0.0267745
ENSG00000156931	ENSG00000156931	protein_coding	VPS8	-1.85088	0.00793992
ENSG00000144283	ENSG00000144283	protein_coding	PKP4	-1.85575	0.0236016
ENSG00000090905	ENSG00000090905	protein_coding	TNRC6A	-1.85604	0.026476
ENSG00000103510	ENSG00000103510	protein_coding	KAT8	-1.85609	0.00696738
ENSG00000171603	ENSG00000171603	protein_coding	CLSTN1	-1.85668	0.0127973
ENSG00000174842	ENSG00000174842	protein_coding	GLMN	-1.85698	0.0207166
ENSG00000188092	ENSG00000188092	protein_coding	GPR89B	-1.85856	0.0130508
ENSG00000138375	ENSG00000138375	protein_coding	SMARCAL1	-1.85872	0.000875785
ENSG00000100221	ENSG00000100221	protein_coding	JOSD1	-1.85925	0.019504
ENSG00000108423	ENSG00000108423	protein_coding	TUBD1	-1.85936	0.0133029
ENSG00000085224	ENSG00000085224	protein_coding	ATRX	-1.85998	0.0118787
ENSG00000132199	ENSG00000132199	protein_coding	ENOSF1	-1.86	0.0169513
ENSG00000011258	ENSG00000011258	protein_coding	MBTD1	-1.86029	0.00129652
ENSG00000182446	ENSG00000182446	protein_coding	NPLOC4	-1.86148	0.00550656
ENSG00000130962	ENSG00000130962	protein_coding	PRRG1	-1.86149	0.00204899
ENSG00000133059	ENSG00000133059	protein_coding	DSTYK	-1.862	0.00962083
ENSG00000148835	ENSG00000148835	protein_coding	TAF5	-1.86292	0.0175701
ENSG00000266173	ENSG00000266173	protein_coding	STRADA	-1.86372	0.0147309
ENSG00000185420	ENSG00000185420	protein_coding	SMYD3	-1.86461	0.00537517
ENSG00000088002	ENSG00000088002	protein_coding	SULT2B1	-1.86467	0.0172705
ENSG00000144724	ENSG00000144724	protein_coding	PTPRG	-1.86571	0.017746
ENSG00000114993	ENSG00000114993	protein_coding	RTKN	-1.86618	0.0118697
ENSG00000163884	ENSG00000163884	protein_coding	KLF15	-1.86639	0.0199483
ENSG00000165359	ENSG00000165359	protein_coding	INTS6L	-1.86671	0.023299
ENSG00000111445	ENSG00000111445	protein_coding	RFC5	-1.86686	0.000925881
ENSG00000169564	ENSG00000169564	protein_coding	PCBP1	-1.86715	0.0400857
ENSG00000162104	ENSG00000162104	protein_coding	ADCY9	-1.86967	0.0162082
ENSG00000117122	ENSG00000117122	protein_coding	MFAP2	-1.87014	0.00754238
ENSG00000070404	ENSG00000070404	protein_coding	FSTL3	-1.87053	0.0150123
ENSG00000104903	ENSG00000104903	protein_coding	LYL1	-1.87078	0.0211696
ENSG00000179593	ENSG00000179593	protein_coding	ALOX15B	-1.87079	0.0172878
ENSG00000139194	ENSG00000139194	protein_coding	RBP5	-1.87165	0.0202661
ENSG00000104808	ENSG00000104808	protein_coding	DHDH	-1.87377	0.000323492
ENSG00000182162	ENSG00000182162	protein_coding	P2RY8	-1.8738	0.000463322
ENSG00000072609	ENSG00000072609	protein_coding	CHFR	-1.87404	0.00684585
ENSG00000167130	ENSG00000167130	protein_coding	DOLPP1	-1.87417	0.00190142
ENSG00000186104	ENSG00000186104	protein_coding	CYP2R1	-1.87424	0.025815
ENSG00000132196	ENSG00000132196	protein_coding	HSD17B7	-1.87495	0.00130673
ENSG00000162771	ENSG00000162771	protein_coding	FAM71A	-1.87497	0.0207942
ENSG00000164695	ENSG00000164695	protein_coding	CHMP4C	-1.875	0.0453894
ENSG00000112130	ENSG00000112130	protein_coding	RNF8	-1.8752	0.0197216
ENSG00000134262	ENSG00000134262	protein_coding	AP4B1	-1.87903	0.0231088
ENSG00000054965	ENSG00000054965	protein_coding	FAM168A	-1.87911	0.0429477
ENSG00000152894	ENSG00000152894	protein_coding	PTPRK	-1.87915	0.0418172
ENSG00000103197	ENSG00000103197	protein_coding	TSC2	-1.88016	0.00916867
ENSG00000100290	ENSG00000100290	protein_coding	BIK	-1.88033	0.00723714
ENSG00000164944	ENSG00000164944	protein_coding	VIRMA	-1.88033	0.040996
ENSG00000104835	ENSG00000104835	protein_coding	SARS2	-1.88038	0.0125367
ENSG00000162542	ENSG00000162542	protein_coding	TMCO4	-1.88118	0.000875074
ENSG00000130382	ENSG00000130382	protein_coding	MLLT1	-1.8836	0.00404842
ENSG00000154822	ENSG00000154822	protein_coding	PLCL2	-1.88384	0.0269899
ENSG00000284976	ENSG00000284976	protein_coding	BX255925.3	-1.8855	0.000251616
ENSG00000165804	ENSG00000165804	protein_coding	ZNF219	-1.88564	0.00267195
ENSG00000159692	ENSG00000159692	protein_coding	CTBP1	-1.88622	0.0144874
ENSG00000168216	ENSG00000168216	protein_coding	LMBRD1	-1.88676	0.01863
ENSG00000275778	ENSG00000275778	protein_coding	AC018630.2	-1.88873	0.00308909
ENSG00000149273	ENSG00000149273	protein_coding	RPS3	-1.88929	0.0243824
ENSG00000204264	ENSG00000204264	protein_coding	PSMB8	-1.88983	0.0393382
ENSG00000067208	ENSG00000067208	protein_coding	EVI5	-1.89045	0.0015387
ENSG00000139651	ENSG00000139651	protein_coding	ZNF740	-1.89142	0.0264933
ENSG00000243244	ENSG00000243244	protein_coding	STON1	-1.89181	0.0155581
ENSG00000112561	ENSG00000112561	protein_coding	TFEB	-1.89264	0.00150883
ENSG00000062822	ENSG00000062822	protein_coding	POLD1	-1.89265	0.000982795
ENSG00000166073	ENSG00000166073	protein_coding	GPR176	-1.89291	0.0443689
ENSG00000122026	ENSG00000122026	protein_coding	RPL21	-1.89321	0.0198656
ENSG00000171132	ENSG00000171132	protein_coding	PRKCE	-1.89343	0.0185337
ENSG00000167671	ENSG00000167671	protein_coding	UBXN6	-1.89378	0.017923
ENSG00000100311	ENSG00000100311	protein_coding	PDGFB	-1.8938	0.0351
ENSG00000011523	ENSG00000011523	protein_coding	CEP68	-1.89477	0.00129449
ENSG00000061987	ENSG00000061987	protein_coding	MON2	-1.89485	0.0228642
ENSG00000175182	ENSG00000175182	protein_coding	FAM131A	-1.89486	0.00200521
ENSG00000160685	ENSG00000160685	protein_coding	ZBTB7B	-1.89529	0.0497696
ENSG00000101082	ENSG00000101082	protein_coding	SLA2	-1.89602	0.0226077
ENSG00000131495	ENSG00000131495	protein_coding	NDUFA2	-1.89648	0.0390569
ENSG00000159788	ENSG00000159788	protein_coding	RGS12	-1.8972	0.000397198
ENSG00000167978	ENSG00000167978	protein_coding	SRRM2	-1.89768	0.0282779
ENSG00000111358	ENSG00000111358	protein_coding	GTF2H3	-1.89768	0.000583556
ENSG00000132024	ENSG00000132024	protein_coding	CC2D1A	-1.89989	0.00828851
ENSG00000116497	ENSG00000116497	protein_coding	S100PBP	-1.90036	0.00630043
ENSG00000227057	ENSG00000227057	protein_coding	WDR46	-1.90056	0.0444149
ENSG00000116106	ENSG00000116106	protein_coding	EPHA4	-1.90122	0.047266
ENSG00000173262	ENSG00000173262	protein_coding	SLC2A14	-1.90138	0.000554477
ENSG00000164062	ENSG00000164062	protein_coding	APEH	-1.90265	0.0131532
ENSG00000103257	ENSG00000103257	protein_coding	SLC7A5	-1.90271	0.00343102
ENSG00000182362	ENSG00000182362	protein_coding	YBEY	-1.9034	0.0104428
ENSG00000166333	ENSG00000166333	protein_coding	ILK	-1.9034	0.0171906
ENSG00000110074	ENSG00000110074	protein_coding	FOXRED1	-1.90348	0.0030094
ENSG00000215012	ENSG00000215012	protein_coding	RTL10	-1.90349	0.018392
ENSG00000135776	ENSG00000135776	protein_coding	ABCB10	-1.90397	0.0010141
ENSG00000157500	ENSG00000157500	protein_coding	APPL1	-1.90614	0.0240917
ENSG00000163026	ENSG00000163026	protein_coding	WDCP	-1.90621	0.0272556
ENSG00000143374	ENSG00000143374	protein_coding	TARS2	-1.90627	0.00373793
ENSG00000221923	ENSG00000221923	protein_coding	ZNF880	-1.90744	0.00121804
ENSG00000175279	ENSG00000175279	protein_coding	CENPS	-1.90753	0.0243888
ENSG00000167608	ENSG00000167608	protein_coding	TMC4	-1.90836	0.022236
ENSG00000008853	ENSG00000008853	protein_coding	RHOBTB2	-1.9088	0.0210983
ENSG00000163737	ENSG00000163737	protein_coding	PF4	-1.912	0.000430426
ENSG00000079335	ENSG00000079335	protein_coding	CDC14A	-1.91241	0.0478622
ENSG00000084693	ENSG00000084693	protein_coding	AGBL5	-1.9137	0.0185462
ENSG00000137764	ENSG00000137764	protein_coding	MAP2K5	-1.9138	0.00162613
ENSG00000141384	ENSG00000141384	protein_coding	TAF4B	-1.91388	0.0103107
ENSG00000137776	ENSG00000137776	protein_coding	SLTM	-1.91449	0.0251675
ENSG00000006756	ENSG00000006756	protein_coding	ARSD	-1.91476	0.0037968
ENSG00000153208	ENSG00000153208	protein_coding	MERTK	-1.91553	0.0002396
ENSG00000167674	ENSG00000167674	protein_coding	HDGFL2	-1.91566	0.0166786
ENSG00000141068	ENSG00000141068	protein_coding	KSR1	-1.91618	0.0292933
ENSG00000152527	ENSG00000152527	protein_coding	PLEKHH2	-1.91875	0.00314809
ENSG00000172354	ENSG00000172354	protein_coding	GNB2	-1.91888	0.0292057
ENSG00000172731	ENSG00000172731	protein_coding	LRRC20	-1.91928	0.00467229
ENSG00000162144	ENSG00000162144	protein_coding	CYB561A3	-1.91946	0.00351768
ENSG00000090013	ENSG00000090013	protein_coding	BLVRB	-1.91977	0.0173265
ENSG00000164002	ENSG00000164002	protein_coding	EXO5	-1.92168	0.0146453
ENSG00000078403	ENSG00000078403	protein_coding	MLLT10	-1.92252	0.0134223
ENSG00000122386	ENSG00000122386	protein_coding	ZNF205	-1.92272	0.025203
ENSG00000076928	ENSG00000076928	protein_coding	ARHGEF1	-1.92282	0.00369658
ENSG00000184304	ENSG00000184304	protein_coding	PRKD1	-1.92455	0.00305656
ENSG00000147364	ENSG00000147364	protein_coding	FBXO25	-1.9247	0.00284928
ENSG00000105708	ENSG00000105708	protein_coding	ZNF14	-1.92563	0.0370577
ENSG00000111859	ENSG00000111859	protein_coding	NEDD9	-1.92612	0.0170836
ENSG00000172830	ENSG00000172830	protein_coding	SSH3	-1.92675	0.0126729
ENSG00000125089	ENSG00000125089	protein_coding	SH3TC1	-1.92738	0.00748099
ENSG00000179922	ENSG00000179922	protein_coding	ZNF784	-1.92882	0.00217586
ENSG00000142453	ENSG00000142453	protein_coding	CARM1	-1.92909	0.0250261
ENSG00000177225	ENSG00000177225	protein_coding	GATD1	-1.9323	0.000387484
ENSG00000144589	ENSG00000144589	protein_coding	STK11IP	-1.93371	0.000278724
ENSG00000160959	ENSG00000160959	protein_coding	LRRC14	-1.93508	0.000816494
ENSG00000112039	ENSG00000112039	protein_coding	FANCE	-1.9358	0.0140197
ENSG00000103126	ENSG00000103126	protein_coding	AXIN1	-1.93582	0.00916338
ENSG00000074964	ENSG00000074964	protein_coding	ARHGEF10L	-1.93634	0.00180056
ENSG00000160050	ENSG00000160050	protein_coding	CCDC28B	-1.93649	0.000316491
ENSG00000250151	ENSG00000250151	protein_coding	ARPC4-TTLL3	-1.93731	0.000819521
ENSG00000128708	ENSG00000128708	protein_coding	HAT1	-1.93781	0.0235445
ENSG00000198959	ENSG00000198959	protein_coding	TGM2	-1.94012	0.0020089
ENSG00000214026	ENSG00000214026	protein_coding	MRPL23	-1.94021	0.00267951
ENSG00000203778	ENSG00000203778	protein_coding	FAM229B	-1.9409	0.00749202
ENSG00000186088	ENSG00000186088	protein_coding	GSAP	-1.94193	0.0364079
ENSG00000101452	ENSG00000101452	protein_coding	DHX35	-1.94239	0.000378863
ENSG00000131558	ENSG00000131558	protein_coding	EXOC4	-1.94269	0.0275821
ENSG00000187824	ENSG00000187824	protein_coding	TMEM220	-1.94321	0.00119903
ENSG00000122585	ENSG00000122585	protein_coding	NPY	-1.94443	0.0128458
ENSG00000129474	ENSG00000129474	protein_coding	AJUBA	-1.94549	0.0122773
ENSG00000166189	ENSG00000166189	protein_coding	HPS6	-1.94627	0.00198731
ENSG00000186106	ENSG00000186106	protein_coding	ANKRD46	-1.94705	0.00163297
ENSG00000070759	ENSG00000070759	protein_coding	TESK2	-1.94714	0.00546248
ENSG00000178826	ENSG00000178826	protein_coding	TMEM139	-1.94767	0.00251753
ENSG00000125995	ENSG00000125995	protein_coding	ROMO1	-1.9479	0.00231249
ENSG00000160991	ENSG00000160991	protein_coding	ORAI2	-1.94807	0.00024053
ENSG00000104164	ENSG00000104164	protein_coding	BLOC1S6	-1.94863	0.00890944
ENSG00000141736	ENSG00000141736	protein_coding	ERBB2	-1.94909	0.00446829
ENSG00000151065	ENSG00000151065	protein_coding	DCP1B	-1.94961	0.0085388
ENSG00000213463	ENSG00000213463	protein_coding	SYNJ2BP	-1.94989	0.044433
ENSG00000118407	ENSG00000118407	protein_coding	FILIP1	-1.95047	0.00508339
ENSG00000101182	ENSG00000101182	protein_coding	PSMA7	-1.95182	0.0357034
ENSG00000266524	ENSG00000266524	protein_coding	GDF10	-1.9522	0.000488603
ENSG00000145919	ENSG00000145919	protein_coding	BOD1	-1.9523	0.0203932
ENSG00000110171	ENSG00000110171	protein_coding	TRIM3	-1.9534	0.0237467
ENSG00000153140	ENSG00000153140	protein_coding	CETN3	-1.95364	0.000739634
ENSG00000166483	ENSG00000166483	protein_coding	WEE1	-1.95451	0.0489348
ENSG00000140859	ENSG00000140859	protein_coding	KIFC3	-1.95462	0.0400208
ENSG00000103249	ENSG00000103249	protein_coding	CLCN7	-1.95483	0.0159435
ENSG00000100916	ENSG00000100916	protein_coding	BRMS1L	-1.95491	0.0151167
ENSG00000103043	ENSG00000103043	protein_coding	VAC14	-1.95506	0.0449375
ENSG00000215041	ENSG00000215041	protein_coding	NEURL4	-1.95591	0.01072
ENSG00000167264	ENSG00000167264	protein_coding	DUS2	-1.95675	0.000226519
ENSG00000182963	ENSG00000182963	protein_coding	GJC1	-1.95801	0.000580906
ENSG00000179335	ENSG00000179335	protein_coding	CLK3	-1.95823	0.0421735
ENSG00000183020	ENSG00000183020	protein_coding	AP2A2	-1.95854	0.0280847
ENSG00000198081	ENSG00000198081	protein_coding	ZBTB14	-1.95896	0.00107064
ENSG00000197576	ENSG00000197576	protein_coding	HOXA4	-1.95915	0.00525214
ENSG00000148303	ENSG00000148303	protein_coding	RPL7A	-1.95943	0.00751065
ENSG00000157368	ENSG00000157368	protein_coding	IL34	-1.95965	0.0211383
ENSG00000124615	ENSG00000124615	protein_coding	MOCS1	-1.96053	0.023806
ENSG00000120832	ENSG00000120832	protein_coding	MTERF2	-1.96102	0.0339183
ENSG00000185344	ENSG00000185344	protein_coding	ATP6V0A2	-1.96142	0.0208958
ENSG00000099991	ENSG00000099991	protein_coding	CABIN1	-1.96206	0.0126936
ENSG00000197879	ENSG00000197879	protein_coding	MYO1C	-1.96216	0.00304617
ENSG00000227500	ENSG00000227500	protein_coding	SCAMP4	-1.96222	0.000902284
ENSG00000160993	ENSG00000160993	protein_coding	ALKBH4	-1.96319	0.00471023
ENSG00000183495	ENSG00000183495	protein_coding	EP400	-1.96334	0.0415436
ENSG00000125037	ENSG00000125037	protein_coding	EMC3	-1.96449	0.0302082
ENSG00000204628	ENSG00000204628	protein_coding	RACK1	-1.96469	0.0105969
ENSG00000184060	ENSG00000184060	protein_coding	ADAP2	-1.96501	0.00314341
ENSG00000204560	ENSG00000204560	protein_coding	DHX16	-1.96513	0.0336228
ENSG00000165996	ENSG00000165996	protein_coding	HACD1	-1.96519	0.00524601
ENSG00000101470	ENSG00000101470	protein_coding	TNNC2	-1.96641	0.00105832
ENSG00000213160	ENSG00000213160	protein_coding	KLHL23	-1.96648	0.0184551
ENSG00000105085	ENSG00000105085	protein_coding	MED26	-1.96677	0.0118414
ENSG00000139531	ENSG00000139531	protein_coding	SUOX	-1.96702	0.00252838
ENSG00000141569	ENSG00000141569	protein_coding	TRIM65	-1.96739	0.00382929
ENSG00000108312	ENSG00000108312	protein_coding	UBTF	-1.9695	0.0183288
ENSG00000167107	ENSG00000167107	protein_coding	ACSF2	-1.97028	0.000249876
ENSG00000178980	ENSG00000178980	protein_coding	SELENOW	-1.97041	0.0358439
ENSG00000132467	ENSG00000132467	protein_coding	UTP3	-1.97075	0.0369418
ENSG00000099381	ENSG00000099381	protein_coding	SETD1A	-1.97109	0.00112061
ENSG00000100842	ENSG00000100842	protein_coding	EFS	-1.97146	0.00795147
ENSG00000196652	ENSG00000196652	protein_coding	ZKSCAN5	-1.97177	0.0079744
ENSG00000131381	ENSG00000131381	protein_coding	RBSN	-1.97293	0.0116805
ENSG00000074590	ENSG00000074590	protein_coding	NUAK1	-1.97373	0.0251904
ENSG00000020129	ENSG00000020129	protein_coding	NCDN	-1.97391	0.000506181
ENSG00000066651	ENSG00000066651	protein_coding	TRMT11	-1.97482	0.0326154
ENSG00000102287	ENSG00000102287	protein_coding	GABRE	-1.97567	0.00732712
ENSG00000130584	ENSG00000130584	protein_coding	ZBTB46	-1.97627	0.000409071
ENSG00000183530	ENSG00000183530	protein_coding	PRR14L	-1.9767	0.0342268
ENSG00000206535	ENSG00000206535	protein_coding	LNP1	-1.97688	0.0143381
ENSG00000189337	ENSG00000189337	protein_coding	KAZN	-1.97705	0.0204082
ENSG00000111321	ENSG00000111321	protein_coding	LTBR	-1.97719	0.0272497
ENSG00000198933	ENSG00000198933	protein_coding	TBKBP1	-1.97721	0.009705
ENSG00000147677	ENSG00000147677	protein_coding	EIF3H	-1.97778	0.0470739
ENSG00000145982	ENSG00000145982	protein_coding	FARS2	-1.97783	0.00169029
ENSG00000101187	ENSG00000101187	protein_coding	SLCO4A1	-1.97823	0.0251778
ENSG00000131386	ENSG00000131386	protein_coding	GALNT15	-1.98083	0.00915188
ENSG00000073849	ENSG00000073849	protein_coding	ST6GAL1	-1.98123	0.00459804
ENSG00000169122	ENSG00000169122	protein_coding	FAM110B	-1.98235	0.000232121
ENSG00000176473	ENSG00000176473	protein_coding	WDR25	-1.98276	0.00210021
ENSG00000171792	ENSG00000171792	protein_coding	RHNO1	-1.98423	0.00501594
ENSG00000160226	ENSG00000160226	protein_coding	CFAP410	-1.98482	0.00943515
ENSG00000105556	ENSG00000105556	protein_coding	MIER2	-1.98488	0.00946188
ENSG00000175581	ENSG00000175581	protein_coding	MRPL48	-1.98521	0.000218951
ENSG00000159445	ENSG00000159445	protein_coding	THEM4	-1.98631	0.00119483
ENSG00000036448	ENSG00000036448	protein_coding	MYOM2	-1.98707	0.0266459
ENSG00000106344	ENSG00000106344	protein_coding	RBM28	-1.98734	0.0199708
ENSG00000134294	ENSG00000134294	protein_coding	SLC38A2	-1.98866	0.0296354
ENSG00000164323	ENSG00000164323	protein_coding	CFAP97	-1.99081	0.041416
ENSG00000184903	ENSG00000184903	protein_coding	IMMP2L	-1.99198	0.000281383
ENSG00000118162	ENSG00000118162	protein_coding	KPTN	-1.99232	0.000216646
ENSG00000102981	ENSG00000102981	protein_coding	PARD6A	-1.99242	0.00725446
ENSG00000143185	ENSG00000143185	protein_coding	XCL2	-1.99277	0.000783613
ENSG00000185052	ENSG00000185052	protein_coding	SLC24A3	-1.9932	0.0228963
ENSG00000068745	ENSG00000068745	protein_coding	IP6K2	-1.99523	0.0496522
ENSG00000148343	ENSG00000148343	protein_coding	MIGA2	-1.99561	0.000247439
ENSG00000074071	ENSG00000074071	protein_coding	MRPS34	-1.99562	0.00803569
ENSG00000054116	ENSG00000054116	protein_coding	TRAPPC3	-1.99582	0.0440813
ENSG00000139517	ENSG00000139517	protein_coding	LNX2	-1.99595	0.0306312
ENSG00000103415	ENSG00000103415	protein_coding	HMOX2	-1.99783	0.0099752
ENSG00000204856	ENSG00000204856	protein_coding	FAM216A	-1.99833	0.0192175
ENSG00000100726	ENSG00000100726	protein_coding	TELO2	-1.99973	0.00313305
ENSG00000137770	ENSG00000137770	protein_coding	CTDSPL2	-2.00006	0.0436677
ENSG00000122678	ENSG00000122678	protein_coding	POLM	-2.00102	0.00193862
ENSG00000237441	ENSG00000237441	protein_coding	RGL2	-2.00131	0.00652412
ENSG00000169733	ENSG00000169733	protein_coding	RFNG	-2.00322	0.00139335
ENSG00000143224	ENSG00000143224	protein_coding	PPOX	-2.00326	0.00253621
ENSG00000176678	ENSG00000176678	protein_coding	FOXL1	-2.00351	0.0291947
ENSG00000171763	ENSG00000171763	protein_coding	SPATA5L1	-2.00387	0.0208282
ENSG00000066135	ENSG00000066135	protein_coding	KDM4A	-2.00453	0.0367172
ENSG00000203791	ENSG00000203791	protein_coding	EEF1AKMT2	-2.00557	0.00490887
ENSG00000197562	ENSG00000197562	protein_coding	RAB40C	-2.0059	0.00750786
ENSG00000183876	ENSG00000183876	protein_coding	ARSI	-2.00607	0.000909244
[truncated: 2,712 more rows]
