# Supplementary material for: Protein Coding and Long Noncoding RNA (lncRNA) Transcriptional Landscape in SARS-CoV-2 Infected Bronchial Epithelial Cells Highlight a Role for Interferon and Inflammatory Response
Source: Genes (Basel). 2020 Jul 7;11(7):760. doi: 10.3390/genes11070760 (PMC7397219; doi:10.3390/genes11070760)
Supplement: Supplementary file 1 [file genes-11-00760-s001.zip › Supplementary table 9.xlsx]

## Sheet: Sheet1
Supplementary table 9. Common uporegulated and dwonregulated lncRNAs in NHBE SARS-CoV-2 and COVID-19 patient.
Gene stable ID	Regulation	Gene type	Gene name
ENSG00000227751	Up	lncRNA	RCC2-AS1
ENSG00000258017	Up	lncRNA	AC011603.3
ENSG00000262413	Up	lncRNA	AC145207.2
ENSG00000266402	Up	lncRNA	SNHG25
ENSG00000276980	Up	lncRNA	AC008760.2
ENSG00000093100	Down	lncRNA	AC016026.1
ENSG00000167920	Down	lncRNA	TMEM99
ENSG00000176868	Down	lncRNA	AL358781.1
ENSG00000204387	Down	lncRNA	SNHG32
ENSG00000213599	Down	lncRNA	SLX1A-SULT1A3
ENSG00000225339	Down	lncRNA	AL354740.1
ENSG00000228830	Down	lncRNA	AL160408.2
ENSG00000228843	Down	lncRNA	AL133410.2
ENSG00000232956	Down	lncRNA	SNHG15
ENSG00000233016	Down	lncRNA	SNHG7
ENSG00000239467	Down	lncRNA	AC007405.4
ENSG00000247271	Down	lncRNA	ZBED5-AS1
ENSG00000248101	Down	lncRNA	AC002116.1
ENSG00000254501	Down	lncRNA	AP003068.1
ENSG00000254873	Down	lncRNA	AP001267.1
ENSG00000256628	Down	lncRNA	ZBTB11-AS1
ENSG00000257264	Down	lncRNA	AC136443.3
ENSG00000257527	Down	lncRNA	AC126755.3
ENSG00000257605	Down	lncRNA	AC073611.1
ENSG00000258232	Down	lncRNA	AC125611.3
ENSG00000258749	Down	lncRNA	AL110504.1
ENSG00000260018	Down	lncRNA	AC040169.1
ENSG00000260257	Down	lncRNA	AL035071.1
ENSG00000260260	Down	lncRNA	SNHG19
ENSG00000260267	Down	lncRNA	AC026471.1
ENSG00000261455	Down	lncRNA	LINC01003
ENSG00000261641	Down	lncRNA	AL031600.3
ENSG00000263731	Down	lncRNA	AC145207.5
ENSG00000266962	Down	lncRNA	AC067852.2
ENSG00000267576	Down	lncRNA	AC011472.3
ENSG00000268205	Down	lncRNA	AC005261.1
ENSG00000268713	Down	lncRNA	AC005261.3
ENSG00000269352	Down	lncRNA	PTOV1-AS2
ENSG00000269910	Down	lncRNA	AL049840.4
ENSG00000269958	Down	lncRNA	AL049840.6
ENSG00000270580	Down	lncRNA	AC139256.3
ENSG00000270953	Down	lncRNA	AC007938.3
ENSG00000271737	Down	lncRNA	AC008608.2
ENSG00000271754	Down	lncRNA	AL355802.3
ENSG00000271853	Down	lncRNA	AL162258.1
ENSG00000272040	Down	lncRNA	AC010245.2
ENSG00000272345	Down	lncRNA	AL031775.1
ENSG00000272523	Down	lncRNA	LINC01023
ENSG00000272686	Down	lncRNA	AC006333.1
ENSG00000272777	Down	lncRNA	AC019131.2
ENSG00000273226	Down	lncRNA	AL391834.2
ENSG00000273420	Down	lncRNA	AC008738.7
ENSG00000273568	Down	lncRNA	AC131009.3
ENSG00000273680	Down	lncRNA	AC009318.2
ENSG00000273972	Down	lncRNA	AC068722.2
ENSG00000274561	Down	lncRNA	AC005332.3
ENSG00000278970	Down	lncRNA	HEIH
ENSG00000281453	Down	lncRNA	TGFB2-OT1
ENSG00000284707	Down	lncRNA	AC079781.5
ENSG00000286104	Down	lncRNA	AC016629.3
ENSG00000286883	Down	lncRNA	AC005041.5
ENSG00000288066	Down	lncRNA	AC097448.1
