# Supplementary material for: Protein Coding and Long Noncoding RNA (lncRNA) Transcriptional Landscape in SARS-CoV-2 Infected Bronchial Epithelial Cells Highlight a Role for Interferon and Inflammatory Response
Source: Genes (Basel). 2020 Jul 7;11(7):760. doi: 10.3390/genes11070760 (PMC7397219; doi:10.3390/genes11070760)
Supplement: Supplementary file 1 [file genes-11-00760-s001.zip › Supplementary table 10.xlsx]

## Sheet: Sheet0
Supplementary table 10. Affected upstream regulator networks in lung tissue from COVID-19 patient compared to healthy subject based on RNA-seq and IPA analysis
Upstream Regulator	Expr Log Ratio	Molecule Type	Predicted Activation State	Activation z-score	Flags	p-value of overlap	Target Molecules in Dataset	Mechanistic Network
CST5	-1.037	other	Activated	5.735	bias	0.00134	ABLIM1,ABT1,ACAT2,AGO1,AHCTF1,AHNAK,ANXA6,ARHGAP29,BCAP31,CBY1,COL12A1,CYBRD1,DDT,DDX54,DHX38,DOCK9,EBNA1BP2,EDC3,EDC4,EEF1D,EEF1G,ESRRA,EXOC3,EZR,GOLGA2,GRSF1,GTF2H3,HNRNPDL,HNRNPH1,HS2ST1,INTS1,INTS10,LOC102724159/PWP2,MRM3,MRTO4,MVP,MYCBP2,NF2,NOM1,NOP10,NOP53,NT5DC3,NUDT16L1,NUMA1,NUP188,PCBP1,PDCL3,PITRM1,POLR2J2/POLR2J3,PPAN,PPIC,PPL,PRPF6,PUF60,PUS1,RBM28,RBM3,RNASEH2B,RTN3,S100A11,SLC4A1A…
IFNG		cytokine	Activated	5.691	bias	0.042	ADA2,ADORA2A,BAX,BCL2A1,BCL2L2,BCL3,BMF,C1QB,C1QC,CARD17,CCL18,CCL4,CD38,CDKN1A,CEACAM1,CXCL16,CYBB,DDR2,DDX58,DDX60,DDX60L,EIF2AK2,EPOR,ERBB2,FCER1G,FCGR1A,GCH1,GGA1,HIRA,HSPG2,IFI44L,IFI6,IFIT1,IFIT2,IFIT3,IFIT5,IFITM1,IFITM2,IL15,IL1RN,INSR,IRF8,IRF9,ISG15,JAK3,JUNB,KCTD7,LAMP3,LARGE1,LGALS3BP,LGALS9,MLKL,MORC2,MX1,MX2,MYD88,NCF2,NMI,OAS1,OAS2,OAS3,OASL,PIM1,PML,PSMB8,RPL23A,RTP4,SAMD9,SBF1,SC…
IFNL1		cytokine	Activated	5.631	bias	6.74e-09	DDX58,DDX60,DDX60L,EIF2AK2,GBP5,GPATCH11,HERC5,IFI44L,IFI6,IFIT1,IFIT2,IFIT3,IFIT5,IFITM1,IFITM2,IFITM3,IRF9,ISG15,LAMP3,LGALS3BP,MLKL,MX1,OAS1,OAS2,OAS3,OASL,PML,RTP4,SAMD9,SHFL,SP110,STAT2,UBE2L6,USP18,XAF1,ZC3HAV1	56 (2)
IFNA2		cytokine	Activated	4.933	bias	2.94e-05	BAX,CYB5A,DDX58,DDX60,EIF2AK2,GPATCH11,HERC5,HSH2D,IFI44L,IFI6,IFIT1,IFIT2,IFIT3,IFIT5,IFITM1,IFITM3,IRF9,ISG15,LGALS3BP,LILRB2,LY6E,MX1,OAS1,OAS2,OAS3,PML,SHFL,SP110,TNFRSF1A,TNFSF10,TP53,UBE2L6,USP18,ZC3HAV1	65 (3)
SPI1	3.894	transcription regulator	Activated	4.143	bias	6.95e-05	C1QC,C3AR1,CCL4,CCNB1,CCND1,CD68,CD72,CDKN1A,CHI3L1,CSF2RA,CSF2RB,CYBB,FTH1,GPR84,IFI44L,IFI6,IFIT1,IFIT2,IFIT3,IFITM1,IFITM3,IL1RN,IRF9,ISG15,LAMP3,LY6E,MX1,NCF2,NCF4,OASL,PSMB8,PTPN6,SP110,TNFRSF14,TNFSF10,USP18,VIM
RNY3		other	Activated	4.123	bias	1.27e-06	DDX60,EPSTI1,HERC5,IFI44L,IFIT1,IFIT3,IFITM3,ISG15,LAMP3,LY6E,MX1,OAS1,OAS2,OAS3,OASL,RTP4,XAF1
PRL		cytokine	Activated	4.094	bias	0.000116	CCNB1,CCND1,CDKN1A,DDX58,DDX60L,EIF2AK2,EPSTI1,FOS,HERC5,IFI44L,IFI6,IFIT1,IFIT3,IFIT5,IFITM1,IRF9,ISG15,JUN,LAMP3,LY6E,MLKL,MX2,OAS1,OAS2,OAS3,SAMD9,SAMD9L,SHFL,SP110,STAT2,USP18,XAF1	54 (2)
mir-122		microRNA	Activated	3.707	bias	0.000285	ACTR1A,ARHGAP1,BCAT2,BCL2L2,BICD1,CDA,CDC42BPB,CTCF,FKBP1A,FUT8,G6PD,GALNT10,GIT1,LETM1,MAP3K12,MAP4,MARK1,NUDC,PTPN1,PXN,RBM3,RCC2,SEPTIN9,SERPINB6,SF3B4,SH3BGRL3,TGM2,TNPO2,TPD52L2,VAMP3,VIM
TGM2	-1.94	enzyme	Activated	3.574	bias	5.19e-06	AQP9,BCL2A1,BTG2,C5AR1,CCL24,CCL4L1/CCL4L2,CCND1,CD300C,CD74,CD93,CDK6,CEACAM1,CLC,CSRNP1,CYP2R1,DAAM2,DAPK2,DDX60,DDX60L,DNAAF2,FCER1G,FFAR2,GCA,GIMAP6,IFI6,IFIT1,IFIT2,IFIT3,IFIT5,IRF9,KIAA0513,LGALS9,LILRA5,LILRB2,LRRC25,LRRK2,LY6E,MERTK,MMP8,MORC2,MYO9A,NCF2,OAS1,OAS2,OAS3,OASL,OTUD6B,PDGFRB,PIM1,PPP1R16B,RFLNB,RTKN2,S100A8,SAMD9L,SELL,SEMA6B,SLC9B2,SP110,SWT1,TAF4B,TNF,TP53,TPCN1,TUBGCP5,TYR…
miR-122-5p (miRNAs w/seed GGAGUGU)		mature microRNA	Activated	3.479	bias	0.042	AKT3,BACH2,DSTYK,EEF1A1,FAM117B,FUNDC2,GALNT10,MAPK11,MECP2,P4HB,PALM,PSME3,TPD52L2,TRIB1,UBAP2,VIM
CDK19		kinase	Activated	3.313	bias	0.00339	ACVR1B,ALDOC,ANKRA2,BAIAP2,BAX,BTG2,CDKN1A,CGRRF1,DDB2,IP6K2,JUN,LSS,MVD,MVK,MXD1,MXD4,NOL8,NOTCH1,PHLDA3,RAD9A,RNF19B,RXRA,SESN1,SFN,SPHK1,TCN2,TRAF4,TSC22D1,TSPYL2,UPP1,ZMAT3
miR-22-3p (miRNAs w/seed AGCUGCC)		mature microRNA	Activated	3.283	bias	0.00153	ACVR1B,AGBL5,ARRB1,BIN1,CYTH3,EDC3,FRAT2,MECOM,MVB12B,PPP1R9A,ZCCHC14
NUPR1	-2.818	transcription regulator	Activated	3.242		0.109	ACAD10,ACSS1,ACTR3B,ADCY9,ALDOC,ANGEL1,ANP32A,ARMC7,ATP6V0A1,B3GNT5,C3orf62,C8orf58,CACNA2D2,CASTOR2,CCDC77,CCDC9,CD68,CENPC,CHD4,CNPY4,CSTF2T,CTPS2,CYSTM1,DHCR24,DIDO1,DIPK2A,DNTTIP1,DSN1,ETV1,FGF1,FHL2,FLVCR1,GCH1,GPCPD1,GPSM2,HLTF,HOXB5,HSPA2,IFIT2,ING2,IP6K2,JADE2,JOSD1,KANK2,KAT5,KBTBD7,LINC01963,LMAN2L,LMNB1,MAFG,MAT2A,MGLL,MGME1,MRS2,MTRES1,MX2,MXD1,MYD88,MYO18A,NCKIPSD,NDRG1,NFIL3,NR1D2,N…
Interferon alpha		group	Activated	3.151	bias	0.00232	ACP2,ADA2,APOBEC3A,APOL3,BCR,BTG2,CDKN1A,CSF2RB,DDX58,EIF2AK2,EPSTI1,FOS,GATA3,GBP5,GIMAP4,HERC5,IFI44L,IFI6,IFIT1,IFIT2,IFIT3,IFITM1,IFITM2,IL15,IL18RAP,IRF8,IRF9,ISG15,ITPR1,LAMP3,LARGE1,LGALS9,MOB3C,MORC2,MX1,MX2,MYD88,NF2,NFIL3,NT5C3A,OAS1,OAS2,OAS3,PI4K2B,PML,RPL23A,RTP4,SAMD9,SAMD9L,SERPINB9,SGSM3,SHFL,SP110,SPRY4,STAP1,STAT4,TNF,TNFSF10,TNFSF13B,TRIOBP,UBA7,UBE2L6,USP18,ZBED2	80 (2)
mir-15		microRNA	Activated	2.955		0.0353	BCL2L2,DDX58,IFIT1,ISG15,MX1,OAS1,RECK,TNF,WEE1
TRAP1	-3.284	enzyme	Activated	2.887	bias	0.0412	ATP5F1D,C1QBP,COX5A,COX5B,ECSIT,GFER,HSD17B10,ISCU,NDUFA11,NES,SARS1,TIMM13
PAF1		other	Activated	2.853	bias	0.0202	CCL3L3,CCL4L1/CCL4L2,DDX58,H2AC6,HERC5,IFI44L,IFIT3,IFITM3,ISG15,MXD1,OAS2,OAS3,OASL,PNP,SERTAD1,ZC3HAV1
STAT1		transcription regulator	Activated	2.628	bias	0.00833	ALPK1,C1S,C4A/C4B,CCL19,CDKN1A,DDX60,EPSTI1,FCER1G,GBP5,IFI30,IFI44L,IFI6,IFIT1,IFIT2,IFIT3,IFITM1,IRF8,IRF9,ISG15,LY96,MX1,OAS1,OAS2,OAS3,PIM1,PRKCE,RTP4,SAMD9L,SLC51B,TIGD6,TNF,TNFSF10,TRIM21,ULK1,USP30-AS1,XAF1
FSH		complex	Activated	2.547		0.233	ACP2,ACTB,ADCY9,ALPL,ARHGAP1,ARHGAP35,ARHGEF5,ARPC1A,BTG2,CARD10,CASP4,CASP9,COL18A1,CREBZF,CYP19A1,DUSP1,DUSP3,ENC1,EZR,FLNC,FOXK2,GNAS,GPRC5B,HDAC5,ILK,ING2,ITPR1,LRRC32,LYPD3,MAP2K3,MEF2D,MSMO1,PDLIM3,PDXK,PI4K2A,POP5,PPIH,PPP2R5B,PPP3R1,PRKD1,PRKX,PTP4A1,PTPN1,RAB4A,RGS12,RHOB,SH3BP4,SMAD7,SMARCA4,STK24,STK25,TK1,TP53,TRIB1,TUBA1A,UPP1,YTHDF2,ZBED1,ZNF331
EIF2AK2	4.354	kinase	Activated	2.482	bias	0.00115	AKT2,ATF4,BHLHE40,CCND1,DDX58,EIF2AK2,IFI6,IFIT1,IFIT5,IFITM1,IFITM2,ISG15,LGALS3BP,NEDD9,NMI,OAS1,OAS3,SP140,TUBA1A,UBE2L6,USP18,ZC3HAV1	52 (2)
SGPL1		enzyme	Activated	2.412	bias	0.000362	BAX,DDX58,IFIT1,ISG15,MX1,OAS1	38 (2)
Lh		complex	Activated	2.331		0.154	ACP2,ACTB,ADCY9,ALPL,ARHGAP1,ARHGAP35,ARHGEF5,ARPC1A,CARD10,CASP4,CASP9,COL18A1,CYP19A1,DUSP1,DUSP3,EZR,FLNC,GNAS,GPRC5B,ILK,ITPR1,MAP2K3,MSMO1,PDLIM3,PDXK,PI4K2A,POP5,PPIH,PPP2R5B,PPP3R1,PRKAR2A,PRKD1,PRKX,PTP4A1,PTPN1,RAB4A,RAPGEF3,RGS12,RHOB,SH3BP4,SMARCA4,STK24,STK25,TK1,TP53,TRIB1,TUBA1A,UPP1
IFT88		other	Activated	2.236	bias	0.0496	ACAT1,ACAT2,FDPS,HAMP,MVD
IRF9	2.278	transcription regulator	Activated	2.236	bias	0.000759	CCL19,IFIT1,IFIT2,IFIT3,IFITM1,IFITM3,MX1,OAS2,STAT2
IFNL4		cytokine	Activated	2.209	bias	0.0323	DDX58,ISG15,MX1,OAS1,OAS2
IFNA1/IFNA13		cytokine	Activated	2.156	bias	0.0192	IFI6,IFIT2,ISG15,MX1,OAS2
JAK		group	Activated	2.132	bias	0.0196	DDX58,EIF2AK2,IFI6,IFIT1,IFIT2,IFIT3,IFITM3,ISG15,VIM
CEBPA	-1.301	transcription regulator	Activated	2.029	bias	0.00934	ALOX5AP,ARHGEF5,BCL2A1,BIK,BTG2,C3AR1,CCL4,CDKN1A,CEBPA,CHI3L1,CSF2RA,CSF3R,FXR2,GATA2,GCH1,GPR84,HAMP,IFI6,IL1RN,ISG15,LGALS1,LITAF,LST1,LTF,LYL1,MC1R,NFATC2,NFIL3,OAS2,RGS2,RIN1,S100A9,SULT1A3/SULT1A4,THBD,TNFSF10,TRIB1,ZBTB48
SMARCB1	-1.779	transcription regulator	Activated	2.018		0.106	CCND1,CDKN1A,EIF2AK2,IFITM1,MX1,OAS1,OAS3,SMARCB1,TP53
VDR		transcription regulator	Inhibited	-2		0.0663	CDKN1A,COL1A1,IFI44L,PDLIM2,PLCG1,THBD,UCP2
TCF4		transcription regulator	Inhibited	-2.096		0.325	ADAMTS9,ADAT2,AKT1,APH1A,AXIN2,BHLHE40,CARS2,CASP4,CCND1,CD38,CDK6,CSRNP1,DPT,DUS3L,EXOSC1,EXOSC7,FGF1,GEMIN6,GRB14,IL15,IMP4,JAG1,JUN,KALRN,MIA,MRTO4,MVP,NCOR2,NEDD9,NOD1,NOTCH1,PDCD11,PDE7B,PDPK1,PFDN6,PPIH,PUS3,RHOC,RPL7,SIRT1,SLC12A7,SMAD7,SP140L,STAT2,SURF6,TARS3,TNFSF10,TNFSF13B,TRIM38,TSR1
NUP98-DDX10		fusion gene/product	Inhibited	-2.111		0.0729	CLEC7A,EED,EGR1,HEY1,HOXA5,HOXB3,HOXB5,MEIS1,RYK,ZFHX3,ZNF521
TFEB	-1.893	transcription regulator	Inhibited	-2.132	bias	0.0097	CLCN7,GALNS,HEXA,MCOLN1,NAGLU,PIP4P1,PSAP,SGSH,TPP1
TAP1		transporter	Inhibited	-2.205	bias	0.0496	EIF2AK2,IFIT1,MX1,OAS1,TNF
NTRK1		kinase	Inhibited	-2.219	bias	0.0102	CDKN1A,EGR1,FOS,NR4A1,TP53
USP18	3.255	peptidase	Inhibited	-2.39	bias	0.0012	IFI6,IFITM3,IRF9,MX1,OAS1,TNFSF10
SOX2		transcription regulator	Inhibited	-2.412		1	CCND1,EOMES,GLI3,HOXB3,IER5L,JAG1,MEIS1,SNAI1,VIM,ZFHX3
BMP4		growth factor	Inhibited	-2.426	bias	0.0411	ABCG2,CDH5,CDKN1A,CEBPA,CYP19A1,DEPP1,GATA2,GATA3,HAMP,HEY1,LCP1,MAFK,MFAP5,MXD1,NUPR1,PGF,PPARD,PRR5,S100P,TFAP2C,TGM2,TP53,VGLL1,XAGE2
CRTC2		other	Inhibited	-2.438	bias	0.00683	BACH2,CCND1,CDK6,CYP19A1,MTA3,SMARCA4,TCF3
TCR		complex	Inhibited	-2.471	bias	0.00213	ABLIM1,AKT3,ARHGEF1,ATP5PB,BATF,BCL2A1,BCL3,CD38,CDK13,DDX58,FLNA,FOS,HERC5,HSD17B10,IDH2,IFI44L,IFI6,IFIT1,IFIT2,IFIT3,ISG15,JUN,LIPA,LMNB1,MX1,MX2,MYD88,NR4A1,OAS1,OASL,ODC1,PASK,PFDN6,PHB,PIM1,PLCG1,RPL10A,RPL15,RPL18A,RPL23A,RPL3,RPL4,RPL5,RPL6,RPL7,RPLP0,RPS16,RPS3,RPS3A,RPSA,SELL,SLC25A3,SMAD7,STAT5A,TALDO1,TNF,TNFSF13B,TRAF2,TUFM,UNC13D,UQCRC1,USP21,ZC3HAV1
GPER1		G-protein coupled receptor	Inhibited	-2.494	bias	0.035	BHLHE40,CCND1,CYP19A1,DUSP1,EGR1,ERRFI1,ESRRA,FOS,FOSB,IER2,ITPRIP,JUN,RND1,TNF
UHRF2		enzyme	Inhibited	-3	bias	0.0353	ADIPOR2,AKT1,CBX7,CCNE1,CKB,FHDC1,MOAP1,PPP1R13B,SIVA1
TP53	1.243	transcription regulator	Inhibited	-3.002		1	ACTB,ACTL6A,AKT1,APAF1,ARPC1B,ASXL1,BAP1,BAX,BCL3,BHLHE40,BIK,BMF,BMX,BTG2,CASP4,CASP6,CCNB1,CDC7,CDKN1A,CEBPA,CHEK2,CHMP4C,COL18A1,CPOX,CSF3R,CSNK1D,CYP19A1,DBF4,DDB2,DNM2,DNMT1,DSN1,ECM1,EGR1,ENSA,FDPS,FKBP1B,FOS,FTH1,FUT1,FYN,GSK3A,HDAC3,HERC5,HSPA8,HTT,IL1RN,ING2,INKA2,ISCU,ISG15,JUNB,KSR1,LGALS3,LMO3,LOC102724788/PRODH,LSS,LTBP1,MAP2K2,MAP2K6,MAP2K7,MAP4,MAPK1,MAPK12,MCM2,MCM6,MCM7,MLH1,MRPL…
ERG		transcription regulator	Inhibited	-3.941	bias	0.00833	ACOT8,ARHGAP17,AXIN2,BCR,CDC42BPB,COLGALT1,DAAM1,DBN1,DNMBP,DOCK1,DSTN,FLNC,FLT1,FYN,GAK,HDAC6,HERPUD1,HPCAL1,ILK,MYO1D,PREX2,PRKCI,PXN,RAPGEF1,RASIP1,RASSF1,RGS3,RHOJ,RPA1,RRAS,SIRT5,SLIT2,SNAI1,TACC1,TMPRSS2,TRIOBP,VIM,WASF3,WDR91,WIPF1,WNT11,WNT2B
BTK		kinase	Inhibited	-4.068		0.0138	CCL4,CD38,CDKN1A,EMP1,IFI44L,IFIT1,IFIT3,IFITM1,IRF9,ISG15,JUN,MX1,MX2,OAS2,OAS3,PIM1,TNF
IL1RN	6.267	cytokine	Inhibited	-4.264	bias	0.038	DDX58,IFI44L,IFI6,IFIT3,IFIT5,IRF9,KCTD7,LAMP3,LGALS9,MX1,MX2,OAS1,OAS2,OAS3,OASL,PML,RTP4,SAMD9,STAT2,TNF,TNFSF10,USP18
SYVN1	-2.584	transporter	Inhibited	-4.32	bias	0.000955	ACP2,ADCY9,AHR,ATP1A1,BCAT1,BHLHE40,CAVIN1,CCND1,CDA,CDK11B,CEP164,CSPG4,CTPS1,DAG1,DUSP1,EXT2,GNB2,HERC5,IFITM2,LGALS3BP,MCAM,MGRN1,OLR1,PCBP1,PFN1,PLD2,PODXL,PSMC3,PTBP1,RAB34,RNF31,RPL18,SKIV2L,SLC30A1,SLC35C2,SLC39A10,SLC7A5,SLCO4A1,TMEM106B,UNC13D,USP5,ZC3HAV1
EHMT1	-1.647	transcription regulator	Inhibited	-4.811	bias	0.0286	ATP1A1,BCR,CD38,CYB5A,ETNK2,GFOD1,GTF2IRD1,IL17RC,ITPRIP,LOC102724788/PRODH,MLH1,MSLN,NIBAN2,PLA2G10,PPL,PRR15L,RAB11FIP3,RGCC,RRAD,RXRA,SCAMP4,SDSL,SELENBP1,SH3TC1,SLC7A7,SLC8B1,TLE2,UNC13B
ASPSCR1-TFE3		fusion gene/product	Inhibited	-4.849	bias	0.00339	ATP6V0C,BHLHE40,BIN1,C12orf49,CIB1,CTSA,CTTN,DEXI,DST,EPAS1,EPOR,EZR,GPRC5B,IFI30,LOC102724788/PRODH,MAFF,MREG,PACSIN2,POPDC2,PXN,RALGDS,RHBDF1,SLC9A1,TACC1,TACC2,TCN2,THEM6,UAP1L1,UPP1,VAT1,WIPI1
MAPK1	-1.822	kinase	Inhibited	-6.238		6.29e-05	APBB3,C1S,CCNB1,CCND1,CDKN1A,CHST7,CRYL1,DDX58,DUSP1,DXO,EIF2AK2,EVI5,FLNC,FOS,H2AZ2,HERC5,IFI6,IFIT1,IFIT2,IFIT3,IFIT5,IFITM1,IFITM3,IRF9,ISG15,LAMP3,LGALS3BP,MAST3,MECP2,MUC5AC,MVP,MX2,NMI,NUP188,OAS1,OAS2,OAS3,OASL,PDLIM3,PLAAT2,PML,PPT2,PSMB8,SP110,SPRY4,STAT2,SUN2,TNF,TNFSF10,TRIM21,TRIM38,TRPC1,UBE2L6,USP18,VIM,WIPF1,ZC3HAV1,ZNF318
