# Supplementary material for: Protein Coding and Long Noncoding RNA (lncRNA) Transcriptional Landscape in SARS-CoV-2 Infected Bronchial Epithelial Cells Highlight a Role for Interferon and Inflammatory Response
Source: Genes (Basel). 2020 Jul 7;11(7):760. doi: 10.3390/genes11070760 (PMC7397219; doi:10.3390/genes11070760)
Supplement: Supplementary file 1 [file genes-11-00760-s001.zip › Supplementary table 11.xlsx]

## Sheet: Sheet0
Supplementary table 11. Disease and function analysis based on IPA analysis of differentially expressed genes in lung tissue from COVID-19 patient.
Categories	Diseases or Functions Annotation	p-value	Predicted Activation State	Activation z-score	Molecules	# Molecules
Cell Death and Survival	Necrosis	0.000219	Increased	3.509	AAK1,ABCG2,ACD,ACVR1B,ADAMTS9-AS2,ADGRL2,ADRA1D,AGA,AGPAT2,AHR,AIFM1,AIMP2,AKT1,AKT2,AKT3,ALDH3A1,ALDH3B1,ANG,ANKZF1,AP2A2,AP2M1,APAF1,APC,ARHGAP4,ARHGEF3,ARNT,ARRB1,ARRB2,ATF4,ATG14,ATP13A2,ATP1A1,ATP7B,AXIN1,BACH2,BAG3,BAG4,BAG6,BANCR,BANP,BAP1,BAX,BBS4,BCAP31,BCAR1,BCHE,BCL2A1,BCL2L14,BCL2L2,BCL3,BCR,BHLHE40,BIK,BMF,BMX,BPI,BRAT1,BTG2,BUD23,C5AR1,C8orf44-SGK3/SGK3,CAB39L,CABLES1,CABLES2,CACNA2…	637
Cell Death and Survival	Cell death of tumor cell lines	0.000154	Increased	3.249	ABCG2,ACD,ACVR1B,ADAMTS9-AS2,ADGRL2,AGA,AGPAT2,AHR,AIFM1,AIMP2,AKT1,AKT2,AKT3,ANG,AP2A2,AP2M1,APAF1,APC,ARHGAP4,ARHGEF3,ARNT,ARRB2,ATF4,ATG14,ATP13A2,ATP1A1,AXIN1,BACH2,BAG3,BAG6,BANCR,BANP,BAP1,BAX,BBS4,BCAP31,BCAR1,BCHE,BCL2A1,BCL2L14,BCL2L2,BCL3,BCR,BHLHE40,BIK,BMF,BMX,BRAT1,BTG2,BUD23,C5AR1,C8orf44-SGK3/SGK3,CAB39L,CABLES1,CABLES2,CACNA2D2,CAMK1,CASP4,CASP6,CASP7,CASP8AP2,CASP9,CBR1,CCAR1,CCA…	532
Cell Death and Survival	Apoptosis of tumor cell lines	0.000217	Increased	2.962	ABCG2,ACD,ACVR1B,ADAMTS9-AS2,ADGRL2,AGA,AGPAT2,AHR,AIFM1,AIMP2,AKT1,AKT2,AKT3,AP2A2,AP2M1,APAF1,APC,ARHGAP4,ARHGEF3,ARNT,ARRB2,ATF4,ATP1A1,AXIN1,BACH2,BAG3,BAG6,BANCR,BANP,BAP1,BAX,BBS4,BCAP31,BCAR1,BCL2A1,BCL2L14,BCL2L2,BCL3,BCR,BHLHE40,BIK,BMF,BMX,BRAT1,BUD23,C5AR1,C8orf44-SGK3/SGK3,CAB39L,CABLES2,CACNA2D2,CAMK1,CASP4,CASP6,CASP7,CASP8AP2,CASP9,CCAR1,CCAR2,CCDC8,CCNB1,CCND1,CCNE1,CCNL2,CDC37,CD…	427
DNA Replication, Recombination, and Repair	Aberration of chromosomes	0.00111	Increased	2.781	CCNB1,CENPC,CENPT,RAD52,REV1,REV3L,RPA1,TNF	8
Cancer,Organismal Injury and Abnormalities,Renal and Urological Disease	Urinary tract cancer	0.00784	Increased	2.53	AADAT,ACADS,ACAP3,ACAT1,ACOX2,ACR,ACTB,ACVR1B,ADAMTS9,ADCY6,ADORA2A,AEBP2,AFDN,AGFG2,AGO1,AHNAK,AHR,AHRR,AJUBA,AKAP11,AKAP13,AKT1,AKT2,ALKBH8,ALPK1,AMACR,ANAPC4,ANKHD1/ANKHD1-EIF4EBP3,ANKRD11,ANKRD40,APAF1,APBA2,APC,AQP9,ARAP3,ARHGAP35,ARHGEF7,ARNT,ARSD,ASAP3,ASMTL,ASXL1,ATAD3B,ATG2A,ATPAF2,ATRX,AXIN2,B4GALT3,BAP1,BASP1,BAX,BCL2L2,BCOR,BCR,BHLHE40,BICD2,BLVRB,BMP1,BRD8,BRWD1,BST1,BTBD7,BTG2,BUD13…	672
Cancer,Organismal Injury and Abnormalities,Renal and Urological Disease	Urinary tract tumor	0.0178	Increased	2.53	AADAT,ACADS,ACAP3,ACAT1,ACOX2,ACR,ACTB,ACVR1B,ADAMTS9,ADCY6,ADORA2A,AEBP2,AFDN,AGFG2,AGO1,AHNAK,AHR,AHRR,AJUBA,AKAP11,AKAP13,AKT1,AKT2,ALKBH8,ALPK1,ALYREF,AMACR,ANAPC4,ANKHD1/ANKHD1-EIF4EBP3,ANKRD11,ANKRD40,APAF1,APBA2,APC,AQP9,ARAP3,ARHGAP35,ARHGEF7,ARNT,ARSD,ASAP3,ASMTL,ASXL1,ATAD3B,ATG2A,ATPAF2,ATRX,AXIN2,B4GALT3,BAP1,BASP1,BAX,BCL2L2,BCOR,BCR,BHLHE40,BICD2,BLVRB,BMP1,BRD1,BRD8,BRF1,BRWD1,BST1…	680
Cell Death and Survival	Cell death of cervical cancer cell lines	0.0123	Increased	2.43	ACD,ADGRL2,AIFM1,AKT1,AKT3,AP2M1,ARHGAP4,ARHGEF3,ATP1A1,BAG6,BAX,BBS4,BCAP31,BCL2A1,CASP4,CASP8AP2,CCAR2,CCNB1,CCND1,CDC7,CDK9,CDKN1A,CDKN2AIP,CEBPA,CIB1,CLK3,COX5A,CSNK2A2,CTTN,DDB2,DGKD,DNM2,DYNC1H1,EEF1A1,EIF2AK2,EXOC2,EZR,FASTKD2,FIS1,FOS,FOXO4,FTH1,GADD45G,GLI3,GNA11,GZMM,HAUS8,HDAC5,HNRNPH1,HSPB2,HTT,INIP,ITGB1BP2,ITPR1,JUN,JUNB,KIF1C,LETM1,LMNA,MADD,MAML1,MAN2C1,MAP2K6,MAP3K12,MAPK1,MCOLN1…	124
Gene Expression,Protein Synthesis	Translation of RNA	0.016	Increased	2.263	ABCF1,BTG2,CTIF,EIF2AK2,EIF2B4,EIF2B5,EIF3B,EIF3D,EIF3F,EIF3H,EIF3K,EIF4E2,EIF4G1,ENC1,LTO1,MRPL23,MTIF2,MTRF1,PAIP2B,RNF139,RPL13A,RPL19,RPS14,RPS3,RPS3A,RPS4Y1,RPS5,RPS6KB2,RPS9,SARS1,SHFL,TCOF1,TSC1,ZNF540	34
Cell Death and Survival	Apoptosis of cervical cancer cell lines	0.0149	Increased	2.156	ACD,ADGRL2,AIFM1,AKT1,AKT3,AP2M1,ARHGAP4,ARHGEF3,BAG6,BAX,BBS4,BCAP31,BCL2A1,CASP4,CASP8AP2,CCAR2,CCNB1,CCND1,CDC7,CDK9,CDKN1A,CDKN2AIP,CEBPA,CLK3,COX5A,CSNK2A2,CTTN,DDB2,DGKD,DNM2,DYNC1H1,EEF1A1,EIF2AK2,EXOC2,EZR,FASTKD2,FIS1,FOS,FOXO4,GADD45G,GLI3,GNA11,GZMM,HDAC5,HNRNPH1,HSPB2,ITGB1BP2,ITPR1,JUN,KIF1C,MADD,MAN2C1,MAP3K12,MAPK1,MCOLN1,MGAT3,MIB1,MTCH1,MTM1,NAPA,NASP,NEDD9,NIBAN2,NR4A1,PDCD6,PDP…	98
Cardiovascular System Development and Function,Cellular Development,Cellular Function and Maintenance,Cellular Growth and Proliferation,Organismal Development,Tissue Development	Network formation of vascular endothelial cells	0.0015	Decreased	-2	DLL4,NDNF,NOTCH1,NOTCH4	4
Cellular Movement	Invasion of prostate cancer cell lines	0.00676	Decreased	-2	ACVR1,ADGRE5,AHNAK,AKT1,AKT2,ARHGAP4,ATP6V0A1,CCL11,CD74,CDH13,DBN1,EGR1,EMP1,ESRRA,ETV1,EZR,GNA12,GNAS,HPN,LCP1,LGALS3,LMNA,MAPKAPK2,MX1,NDRG1,NES,NSD2,PEBP1,PI4KA,PLXNA2,PML,PODXL,PRKCE,RAD9A,S100A11,SEPTIN9,SKP2,TNF,TNFSF10,TP53,TRAP1,VIM	42
Carbohydrate Metabolism	Synthesis of carbohydrate	0.0166	Decreased	-2.076	ABHD3,ACBD6,ADRA1D,AGPAT1,AGPAT2,AGPAT4,AKT1,AKT2,ALG12,AMDHD2,APLN,APLNR,B3GNT8,B4GALT2,B4GALT3,B4GALT7,BMX,CANT1,CHKB,CHPF,CHPF2,CHST1,CHST7,CSNK2A2,CSPG4,DDHD2,DGKQ,DPM2,DPM3,DSEL,DYRK2,ETNK2,EXT2,EXTL3,F2R,FCGR2A,FPR1,FUT8,G6PD,GCNT3,GMDS,GNG2,GPAT2,GPAT4,GPD1L,GSK3A,HEXA,HS2ST1,HS3ST3A1,HS6ST1,HSPG2,INPP5K,INSR,LAT,LCAT,LCLAT1,LPCAT4,LPIN3,MTM1,MTMR12,NAGK,NANP,NDST1,PASK,PCTP,PDCL,PDGFB,PDG…	110
Carbohydrate Metabolism	Metabolism of carbohydrate	0.00395	Decreased	-2.117	ABHD3,ACBD6,ADRA1D,AGPAT1,AGPAT2,AGPAT4,AKT1,AKT2,ALDOC,ALG12,AMDHD2,APLN,APLNR,B3GNT8,B4GALT2,B4GALT3,B4GALT7,BMX,BRAT1,CANT1,CBR1,CBR3,CEMIP2,CETP,CHKB,CHPF,CHPF2,CHST1,CHST7,CLN6,CSNK2A2,CSPG4,CYB5A,DDHD2,DGKQ,DHDH,DPM2,DPM3,DSEL,DYRK2,ETNK2,EXT2,EXTL3,F2R,FCGR2A,FPGT,FPR1,FUT1,FUT8,G6PD,GALNS,GALT,GCNT3,GDE1,GMDS,GNG2,GPAT2,GPAT4,GPD1L,GSK3A,GUSB,HECTD4,HEXA,HS2ST1,HS3ST3A1,HS6ST1,HSPG2,INPP5…	154
Cellular Function and Maintenance	Endocytosis by cervical cancer cell lines	0.00556	Decreased	-2.122	AP2M1,ASB1,ATP6V0C,ATP6V0D1,BICD1,BTBD19,CLIC3,DNM2,FCHO2,KAT5,MERTK,NAA60,PDZD8,PTRHD1,SART1,SF3B4,SHANK3,SMARCB1,TNF	19
Cardiovascular System Development and Function,Cellular Development,Cellular Growth and Proliferation,Connective Tissue Development and Function,Digestive System Development and Function,Hepatic System Development and Function,Organ Development,Organismal Development,Tissue Development	Proliferation of hepatic stellate cells	0.018	Decreased	-2.219	AKT1,COL1A1,LGALS1,LGALS3,NPY,TNF	6
Lipid Metabolism,Small Molecule Biochemistry	Metabolism of membrane lipid derivative	0.00609	Decreased	-2.239	ABHD3,ABHD6,ACAT2,ACBD6,AGPAT1,AGPAT2,AGPAT4,AKT1,ALDH3B1,B3GALT4,BMX,CERS4,CERS5,CETP,CHKB,CLN3,CLN6,CPTP,CSNK2A2,CTSA,CYP19A1,CYP7B1,DDHD2,DGKE,DGKQ,DHCR24,DPM2,DPM3,ESYT2,ETNK2,F2R,FCGR2A,FDPS,FDX2,FGF1,FLT1,FOS,G6PD,GBA,GBA2,GDE1,GPAT2,GPAT4,GPD1L,GPX4,HEXA,HSD17B7,INPP5K,IP6K3,LARGE1,LCAT,LCLAT1,LPCAT4,LPIN3,LSS,MBTPS1,MSMO1,MTM1,MTMR12,MVD,MVK,PARD3,PCTP,PDGFB,PDGFRB,PEX7,PGF,PI4K2A,PI4K2B,…	114
Gene Expression	Initiation of transcription	0.000167	Decreased	-2.345	AKAP13,BAX,BRF1,BTG2,CAVIN1,CCNB1,CCND1,CDK9,CDKN1A,ERCC5,ESRRA,FPGS,GTF2E1,GTF2H3,GTF2H4,GTF2I,INTS11,MAML1,MAML3,MAZ,MECP2,MED12,MED16,MED20,MED26,MED27,MED31,MNAT1,NOTCH1,NOTCH4,NR1D2,NR1H2,NR1H3,NR2C2AP,NR2F6,NR4A1,NR5A2,NRBP1,PDZD8,POLR1E,POLR2D,POLR2E,PPARD,RARG,RXRA,RXRB,SUPT16H,TAF1,TAF13,TAF4,TAF4B,TAF5,TBP,TEAD2,TEAD3,THRB,UBTF,WWTR1,ZNF417/ZNF587,ZNF45	60
Cellular Function and Maintenance	Cellular homeostasis	0.0043	Decreased	-2.433	ABCG2,ADRA2A,AFDN,AGA,AKT1,AKT2,AKT3,AMBRA1,AMFR,AP2A2,APAF1,ARHGAP35,ATG101,ATG14,ATG16L1,ATG2A,ATG2B,ATG4B,ATG9A,ATP13A2,ATP1A1,ATP6V0A2,ATP6V0D1,ATP7B,BACE2,BAG3,BAIAP2,BAX,BCAP31,BCR,BMF,C1QTNF1,C5AR1,CACNA1A,CACNA1C,CASP9,CCDC22,CCL11,CCL18,CCL19,CCL4,CCL7,CCL8,CCND1,CCR1,CD27,CD38,CD8A,CDH5,CDKN1A,CEACAM3,CGN,CHEK2,CHMP2A,CHMP4A,CHMP4C,CHMP6,CHRNA10,CLCN3,CLCN7,CLDN2,COX5A,CPTP,CR1,CSNK2A2,…	269
Infectious Diseases	Replication of human herpesvirus 1	0.00178	Decreased	-2.449	IRF9,MLH1,OASL,PML,PPM1M,PTPRU,STAT2	7
Protein Synthesis	Metabolism of protein	2.33e-05	Decreased	-2.486	AAK1,ABCF1,ADA2,ADAM15,ADAMTS9,ADORA2A,AKT1,AMFR,ANAPC1,ANAPC11,ANAPC2,ANAPC4,ANG,APC,APEH,APH1A,APH1B,APTX,ARIH2,ARRB1,ARRB2,ARRDC1,ATG4B,ATP13A2,AURKAIP1,AXIN1,BACE2,BAG3,BAG6,BCL3,BMP1,BTG2,C1S,C4A/C4B,CAPN10,CASP4,CASP5,CASP6,CASP7,CASP9,CCAR2,CDKN1A,CDKN2AIP,CHEK2,CHMP6,CIRBP,CLN6,COG7,CSF2RA,CSF2RB,CSPG4,CSTA,CTIF,CTSA,CTSC,D2HGDH,DACT1,DAG1,DDB1,DIAPH1,DMBT1,DNAJB12,DPM2,DPM3,DROSHA,DUS2,D…	294
Cell Morphology,Cellular Assembly and Organization,Cellular Function and Maintenance	Formation of cilia	8.34e-05	Decreased	-2.635	ABLIM1,ABLIM3,ARL6,ATAT1,AVIL,BBS1,BBS10,BBS4,CCDC28B,CCDC66,CDC14A,CDK11B,CDK9,CEP104,CEP164,CEP250,CEP290,CFAP20,CROCC,CSNK1D,DNAAF1,ENTR1,FHDC1,FLNA,FUZ,HDAC6,HOOK2,HTT,IFT140,IFT172,IFT43,IFT74,INSR,KCTD17,MARK4,MAST3,MATK,MKS1,NUDCD3,PCM1,PRKCI,PRKY,PTK7,RAB17,RAB23,RAB8A,RPGR,SNAI1,TBC1D30,TMEM237,TTC8,WDR35	52
Gene Expression	Transactivation	1.22e-05	Decreased	-2.737	ABTB1,ACTN4,ACVR1B,ACVRL1,AHR,AHRR,AKAP13,APBB1,APPL1,ARHGEF1,ARRB1,ASXL1,ATOX1,AXIN1,AXIN2,BATF,BCR,CARD11,CARM1,CBY1,CDK11B,CDK9,CHD4,DDX58,DDX60L,DTX1,DTX4,DUSP3,DVL1,E2F4,EGR1,EIF2AK2,EPN2,ESRRA,FHL2,FLI1,FOS,FOSB,FOXH1,FOXO4,GATA3,GNB2,GTF2I,HERC5,HERPUD1,HNRNPA1,HTT,IRF8,IRF9,ISG20L2,ITSN1,JUN,JUNB,JUND,KAT5,KCTD11,KDM1A,KDM8,KLF13,LCP2,LGALS1,LTF,MAD2L2,MAP2K6,MAP3K12,MAP3K14,MAPK1,MAPK11,…	147
Protein Degradation,Protein Synthesis	Catabolism of protein	0.00491	Decreased	-2.764	AAK1,ADAM15,ADAMTS9,AKT1,AMFR,ANAPC1,ANAPC11,ANAPC2,ANAPC4,APC,APEH,APH1A,APTX,ARIH2,ARRB1,ARRDC1,ATG4B,ATP13A2,AURKAIP1,AXIN1,BACE2,BAG3,BAG6,BMP1,C1S,CAPN10,CASP4,CASP5,CASP6,CASP7,CASP9,CCAR2,CDKN1A,CDKN2AIP,CHEK2,CHMP6,CLN6,COG7,CSPG4,CSTA,CTSA,CTSC,DACT1,DAG1,DDB1,DIAPH1,DNAJB12,DPM2,DPM3,DVL1,EGLN2,ENDOU,EPHA4,FBXL14,FBXL6,FBXO10,FBXW2,FKBPL,FLNA,FLOT1,FZR1,GBA,GGA3,GGT1,GSAP,HDAC3,HDAC6,HI…	145
Gene Expression	Transactivation of RNA	3.28e-05	Decreased	-2.772	ABTB1,ACTN4,ACVR1B,ACVRL1,AHR,AHRR,AKAP13,APBB1,APPL1,ARHGEF1,ARRB1,ASXL1,ATOX1,AXIN1,AXIN2,BATF,BCR,CARD11,CARM1,CBY1,CDK11B,CDK9,CHD4,DDX58,DDX60L,DTX1,DTX4,DUSP3,DVL1,E2F4,EGR1,EIF2AK2,EPN2,ESRRA,FHL2,FLI1,FOS,FOSB,FOXH1,FOXO4,GATA3,GNB2,GTF2I,HERC5,HERPUD1,HNRNPA1,HTT,IRF8,IRF9,ISG20L2,ITSN1,JUN,JUNB,JUND,KAT5,KCTD11,KDM1A,KDM8,KLF13,LGALS1,LTF,MAD2L2,MAP2K6,MAP3K12,MAP3K14,MAPK1,MAPK8IP1,MAZ…	139
Cellular Assembly and Organization	Development of cytoplasm	4.51e-06	Decreased	-2.849	AKAP1,AKAP11,ANG,ANKRD27,APC,ARHGAP6,ARHGEF10,ARHGEF10L,ARHGEF3,ARHGEF5,ARRB1,ASAP3,ATG101,ATG14,ATG2A,ATG9A,BAIAP2L1,BCAR1,C3AR1,CAMSAP1,CAMSAP2,CCL11,CCL24,CCND1,CD74,CDC14A,CDH5,CDK6,CRTC3,CTTN,CXXC5,DAAM1,DDX31,DIAPH1,ESAM,EVL,F2R,FCGR2A,FHDC1,FIS1,FLNA,FZR1,GNA11,GNG2,GNG5,GNG7,GPR65,HCK,HCLS1,HDAC6,HIP1R,HSPA8,HTT,INPP5K,KANK1,KIF17,LAMTOR1,LAS1L,LETM1,LONP1,MPRIP,MRTFA,MTM1,MYADM,NCKIPSD,N…	112
Gene Expression	Transcription of RNA	3.37e-08	Decreased	-2.86	ABT1,ACTN4,ACVR1,ACVR1B,ACVRL1,AGO1,AHR,AKAP8L,AKNA,AKT1,AKT2,ALYREF,ANG,APBB1,APOL3,ARHGAP35,ARID4A,ARID5A,ARNT,ARRB1,ARRB2,ATF4,ATRX,ATXN7L3,AXIN1,BACH2,BAP1,BASP1,BAX,BCL3,BCOR,BEND3,BEND5,BEX1,BHLHE40,BMX,BRD3,BRD8,BRF1,BTG2,C1QBP,C8orf44-SGK3/SGK3,CAMK1,CAMTA2,CAPRIN2,CAVIN1,CBFA2T2,CBX4,CBX6,CBX7,CBY1,CCAR2,CCNB1,CCND1,CD38,CD74,CDH13,CDK3,CDK9,CDKN1A,CEBPA,CEP290,CHD4,CHD8,CHEK2,CHMP1A,COL…	473
Cell Death and Survival	Cell viability of bone cancer cell lines	0.0165	Decreased	-2.942	AKT1,ATRX,CDKN1A,FBH1,HEY1,HNRNPUL1,LMNB1,MAP2K6,MAPK12,MAPK9,MAPKAPK2,MDK,NUAK1,NUPR1,PIAS4,RAD52,SIRT1,SMARCAL1,SMARCB1,SMARCD3,TOP3A,TP53,TP53BP1,TP53I3,USP11,USP47,YEATS4,YPEL3	28
Cellular Assembly and Organization,Cellular Function and Maintenance,Tissue Development	Formation of actin stress fibers	3.65e-05	Decreased	-3.095	AKAP1,ARHGAP6,ARHGEF10,ARHGEF10L,ARHGEF3,ARHGEF5,ARRB1,ASAP3,BCAR1,C3AR1,CCND1,CDC14A,CDK6,CTTN,CXXC5,DAAM1,DIAPH1,EVL,F2R,FHDC1,FZR1,GNA11,GNG2,GNG5,GNG7,GPR65,HDAC6,INPP5K,LAMTOR1,MPRIP,MRTFA,NCKIPSD,NET1,NF2,NOTCH1,NR4A1,PFN1,PI4K2A,PLCB3,PPM1F,PXN,RAPGEF3,RGCC,RHOB,RHOC,S1PR2,SLC9A1,SMARCA4,STMN1,TNF,TNFAIP1,TPM4,TRPC6,TSC1,VASP,WAS,WNT11	57
Gene Expression	Expression of RNA	4.54e-07	Decreased	-3.098	ABCF1,ABT1,ACTN4,ACVR1,ACVR1B,ACVRL1,AFDN,AGO1,AHR,AKAP8L,AKNA,AKT1,AKT2,ALYREF,ANG,APBB1,APLN,APOL3,ARHGAP35,ARID4A,ARID5A,ARNT,ARRB1,ARRB2,ATF4,ATP13A2,ATRX,ATXN7L3,AXIN1,BACH2,BAP1,BASP1,BAX,BCL3,BCOR,BEND3,BEND5,BEX1,BHLHE40,BMX,BRD3,BRD8,BRF1,BTG2,C1QBP,C1QTNF1,C8orf44-SGK3/SGK3,CAMK1,CAMTA2,CAPRIN2,CAVIN1,CBFA2T2,CBX4,CBX6,CBX7,CBY1,CCAR2,CCNB1,CCND1,CCR1,CD38,CD74,CDH13,CDH5,CDK3,CDK6,CDK9…	546
DNA Replication, Recombination, and Repair	Repair of DNA	0.00193	Decreased	-3.191	ACTR5,ALKBH2,APTX,BAP1,BCR,BTG2,CCND1,CDK9,CDKN1A,CEBPA,CENPS/CENPS-CORT,CHEK2,CIB1,COPS3,CYREN,DDB1,DDB2,EIF3A,EIF4G1,ERBB2,ERCC5,EVL,G6PD,GPS1,GTF2H3,GTF2H4,H4C11,HAT1,HERC2,HINFP,HUS1,INIP,INO80,IRF8,ISY1,KAT5,KAT8,MAD2L2,MCM7,MDC1,MLH1,MNAT1,MPG,MRE11,MSH3,NBN,NFE2L1,NOP53,NR4A1,NSD2,OGG1,OTUB1,PARP2,PARP3,PAXIP1,PAXX,PIAS4,PMS2,POLA1,POLD1,POLE,POLG,POLM,POLR2D,POLR2E,PRKCZ,PWWP3A,RAD51C,RAD…	102
DNA Replication, Recombination, and Repair	Recombination	0.000383	Decreased	-3.369	ALYREF,ATRX,ATXN7L3,CHD4,DDB1,ENDOG,EVL,FBH1,FBXW5,GPS1,HDAC5,HLTF,IK,KANK2,KAT5,LRRC40,LSM4,MCM3AP,MIB1,MRE11,MSH3,PRPF6,RAD51C,RAD51D,RAD52,REST,RFC1,RPA1,RPS9,SART1,SEM1,SERTAD1,SF3A3,SF3B4,SMARCB1,SNRNP200,SNRPD2,SPIDR,SUPT5H,SUPT6H,TIMM13,TOP3A,TP53,WAPL,WEE1,ZNF219	46
Cell Cycle,DNA Replication, Recombination, and Repair	Homologous recombination	0.000349	Decreased	-3.841	ATRX,ATXN7L3,CHD4,DDB1,EVL,FBH1,FBXW5,GPS1,IK,KANK2,KAT5,LRRC40,LSM4,MCM3AP,PRPF6,RAD51C,RAD51D,RAD52,RFC1,RPS9,SART1,SEM1,SF3A3,SF3B4,SNRNP200,SNRPD2,SPIDR,SUPT5H,SUPT6H,TIMM13,TP53,WAPL,WEE1,ZNF219	34
Cell Cycle,DNA Replication, Recombination, and Repair	DNA recombination	0.00122	Decreased	-3.886	ALYREF,ATRX,ATXN7L3,CHD4,DDB1,ENDOG,EVL,FBH1,FBXW5,GPS1,HLTF,IK,KANK2,KAT5,LRRC40,LSM4,MCM3AP,MIB1,MRE11,MSH3,PRPF6,RAD51C,RAD52,REST,RFC1,RPA1,RPS9,SART1,SEM1,SERTAD1,SF3A3,SF3B4,SMARCB1,SNRNP200,SNRPD2,SPIDR,SUPT5H,SUPT6H,TIMM13,TP53,WEE1,ZNF219	42
Gene Expression	Transcription	3.57e-07	Decreased	-3.894	ABT1,ACTN4,ACVR1,ACVR1B,ACVRL1,AFDN,AGO1,AHR,AKAP13,AKAP8L,AKNA,AKT1,AKT2,ALYREF,ANG,APBB1,APLN,APOL3,ARHGAP35,ARID4A,ARID5A,ARNT,ARRB1,ARRB2,ATF4,ATP13A2,ATRX,ATXN7L3,AXIN1,BACH2,BAP1,BASP1,BAX,BCL3,BCOR,BEND3,BEND5,BEX1,BHLHE40,BMX,BRD3,BRD8,BRF1,BTG2,C1QBP,C1QTNF1,C8orf44-SGK3/SGK3,CAMK1,CAMTA2,CAPRIN2,CAVIN1,CBFA2T2,CBX4,CBX6,CBX7,CBY1,CCAR2,CCNB1,CCND1,CCR1,CD38,CD74,CDH13,CDH5,CDK3,CDK6,CDK…	518
Lipid Metabolism,Small Molecule Biochemistry	Synthesis of lipid	0.015	Decreased	-3.97	ABHD3,ACAT1,ACAT2,ACBD6,ACOT8,ACOX2,ACSF3,ACSS1,ADIPOR2,AGPAT1,AGPAT2,AGPAT4,AKT1,ALDH3B1,ALG12,ALOX15B,ALOX5AP,AMACR,ANG,APC,B3GALT4,B3GNT5,BMX,C5AR1,CBR4,CCHCR1,CCL11,CD74,CERS4,CERS5,CETP,CHKB,CLN3,CSNK2A2,CYB5A,CYP19A1,CYP1A1,CYP2R1,CYP7B1,DDHD2,DECR2,DGKE,DGKQ,DHCR24,DHDDS,DHRS11,DHRS9,DIAPH1,DKK3,DOLK,DPM2,DPM3,EDNRA,ESRRA,ETNK2,ETV1,F2R,FAR2,FCGR2A,FDPS,FGF1,FLT1,FOS,FPR1,G6PD,GBA,GBA2,GBG…	170
Cell Signaling	Viral life cycle	0.00171	Decreased	-4.049	APOBEC3A,BANF1,BICD1,CHMP2A,CHMP4A,CHMP4C,CHMP6,EED,EIF2AK2,IFIT1,IFIT5,IFITM1,IFITM2,IFITM3,ISG15,LTF,MVB12B,MX1,NUP133,NUP188,NUP37,NUP85,OAS1,OAS3,OASL,PARD6A,PI4KA,PI4KB,POM121/POM121C,PPIC,RAD52,RPS27A,SHFL,TNF,TP53,UBC,VPS28,VPS37B,ZC3HAV1	39
Cell Cycle,DNA Replication, Recombination, and Repair	Homologous recombination of cells	0.00126	Decreased	-4.191	CHD4,DDB1,FBH1,FBXW5,GPS1,IK,KANK2,KAT5,LRRC40,LSM4,PRPF6,RAD52,RFC1,RPS9,SART1,SEM1,SF3A3,SF3B4,SNRNP200,SNRPD2,SPIDR,SUPT5H,SUPT6H,TIMM13,ZNF219	25
Cell Cycle,DNA Replication, Recombination, and Repair	Recombination of cells	0.00207	Decreased	-4.191	CHD4,DDB1,FBH1,FBXW5,GPS1,IK,KANK2,KAT5,LRRC40,LSM4,MRE11,PRPF6,RAD52,RFC1,RPS9,SART1,SEM1,SF3A3,SF3B4,SNRNP200,SNRPD2,SPIDR,SUPT5H,SUPT6H,TIMM13,ZNF219	26
Cell Signaling	Replication of viral replicon	0.000746	Decreased	-4.413	APOBEC3A,BANF1,EIF2AK2,IFIT1,IFIT5,IFITM1,IFITM2,IFITM3,ISG15,LTF,MX1,OAS1,OAS3,OASL,PI4KA,PI4KB,PPIC,SHFL,TNF,ZC3HAV1	20
Cellular Assembly and Organization,Cellular Function and Maintenance	Organization of cytoplasm	3.27e-11	Decreased	-4.558	ABLIM1,ABLIM3,ACTN4,ACVRL1,ADRA2A,AHNAK,AKAP11,ALS2CL,APC,ARAP3,ARC,ARHGAP4,ARHGAP44,ARHGEF18,ARHGEF19,ARHGEF5,ARHGEF7,ARHGEF9,ARL6,ARPC1A,ATAT1,ATL1,ATP13A2,ATRN,AVIL,BAIAP2,BBS1,BBS10,BBS4,BCAR1,BCS1L,BICD1,BICD2,BIN1,BMX,BNIP1,BRWD1,BST1,BTG2,C1QBP,CAMSAP1,CAMSAP2,CAPN10,CAPZB,CCDC28B,CCDC66,CCDC8,CCL11,CCL19,CCL24,CCL7,CCNB1,CDC14A,CDC42BPA,CDC42BPB,CDC42EP1,CDH13,CDH5,CDK10,CDK11B,CDK5RAP3,C…	314
Cellular Assembly and Organization,Cellular Function and Maintenance	Organization of cytoskeleton	1.26e-07	Decreased	-4.577	ABLIM1,ABLIM3,ACTN4,ACVRL1,ADRA2A,AHNAK,AKAP11,APC,ARAP3,ARC,ARHGAP4,ARHGAP44,ARHGEF18,ARHGEF19,ARHGEF5,ARHGEF9,ARL6,ARPC1A,ATAT1,ATRN,AVIL,BAIAP2,BBS1,BBS10,BBS4,BCAR1,BICD1,BICD2,BIN1,BMX,BRWD1,BST1,BTG2,C1QBP,CAMSAP1,CAMSAP2,CAPN10,CAPZB,CCDC28B,CCDC66,CCDC8,CCL11,CCL19,CCL24,CCL7,CCNB1,CDC14A,CDC42BPA,CDC42BPB,CDC42EP1,CDH13,CDH5,CDK10,CDK11B,CDK5RAP3,CDK9,CEP104,CEP164,CEP192,CEP250,CEP290,C…	258
Cellular Assembly and Organization,Cellular Function and Maintenance	Microtubule dynamics	0.000349	Decreased	-4.844	ABLIM1,ABLIM3,ACTN4,AHNAK,AKAP11,APC,ARHGAP44,ARHGEF9,ARL6,ATAT1,ATRN,AVIL,BAIAP2,BBS1,BBS10,BBS4,BCAR1,BICD1,BICD2,BMX,BTG2,C1QBP,CAMSAP1,CAMSAP2,CCDC28B,CCDC66,CCDC8,CCL19,CDC14A,CDC42EP1,CDH13,CDH5,CDK11B,CDK5RAP3,CDK9,CEP104,CEP164,CEP192,CEP250,CEP290,CFAP20,CHMP4C,CIB1,CNTROB,CROCC,CSNK1D,CTTN,CUL7,CUL9,DAAM1,DAG1,DIAPH1,DNAAF1,DNMBP,DOCK1,DST,DYNC1H1,ENTR1,ERBB2,EZR,F2R,FCGR1A,FGD4,FHDC1,F…	184
Cell Morphology,Cellular Assembly and Organization,Cellular Function and Maintenance	Formation of cellular protrusions	0.000284	Decreased	-5.03	ABLIM1,ABLIM3,ACTN4,AHNAK,APC,ARHGEF9,ARL6,ATAT1,ATRN,AVIL,BAIAP2,BBS1,BBS10,BBS4,BTG2,C1QBP,CAMSAP1,CAMSAP2,CCDC28B,CCDC66,CCL19,CDC14A,CDC42EP1,CDH13,CDK11B,CDK9,CEP104,CEP164,CEP250,CEP290,CFAP20,CROCC,CSNK1D,CTTN,CUL7,DAG1,DIAPH1,DNAAF1,DNMBP,ENTR1,ERBB2,EZR,FHDC1,FLNA,FUZ,GATA3,HCK,HDAC6,HOOK2,HTT,IFT140,IFT172,IFT43,IFT74,INSR,KCTD17,KIF13B,LAMB1,LCP1,LRRK2,LST1,MARK4,MAST3,MATK,MKS1,MRTFA,…	127
Infectious Diseases	Replication of Influenza virus	5.19e-05	Decreased	-6.895	AKAP13,AKT1,AP2M1,APBB1IP,ATP6V0C,ATP6V0D1,BCL3,CANT1,CDC42BPA,CDC42BPB,CLSTN3,CLUH,CRAMP1,CYP2U1,DAPK2,DDX58,DTX2,DTX3,DUSP3,EEF1A1,EIF2AK2,EIF3A,ENGASE,FAU,FBXO44,FCHO2,FDPS,FGFR2,GAK,HECTD1,HERPUD1,HIPK1,HIPK3,HSF4,IFITM1,IFITM2,IFITM3,ISG15,JUN,KATNB1,LONP1,MAP2K2,MAP2K3,MAP2K5,MAP3K12,MAP3K7CL,MAPK1,MARCHF2,MATN3,MNAT1,MX1,NAA10,NMI,NRBP1,NUDCD3,OAS3,PCSK7,PIK3R4,PLD2,PML,PRKAG2,PRKCI,PRPS1,…	95
Infectious Diseases	Replication of Influenza A virus	6.82e-05	Decreased	-7.012	AKAP13,AKT1,AP2M1,APBB1IP,ATP6V0C,ATP6V0D1,BCL3,CANT1,CDC42BPA,CDC42BPB,CLSTN3,CLUH,CRAMP1,CYP2U1,DAPK2,DDX58,DTX2,DTX3,DUSP3,EEF1A1,EIF2AK2,EIF3A,ENGASE,FAU,FBXO44,FCHO2,FDPS,FGFR2,GAK,HECTD1,HERPUD1,HIPK1,HIPK3,HSF4,IFITM1,IFITM2,IFITM3,ISG15,JUN,KATNB1,LONP1,MAP2K2,MAP2K3,MAP2K5,MAP3K12,MAP3K7CL,MAPK1,MARCHF2,MATN3,MNAT1,MX1,NAA10,NMI,NRBP1,NUDCD3,OAS3,PCSK7,PIK3R4,PLD2,PML,PRKAG2,PRKCI,PRPS1,…	94
Infectious Diseases	Replication of virus	0.000555	Decreased	-7.277	ABLIM3,AGO1,AKAP13,AKT1,AP2M1,APBB1IP,ATP6V0C,ATP6V0D1,BAX,BCL3,CANT1,CCL4,CD38,CDC42BPA,CDC42BPB,CLSTN3,CLUH,CRAMP1,CTBP1,CYP1A1,CYP2U1,DAPK2,DDX58,DROSHA,DTX2,DTX3,DUSP1,DUSP3,EEF1A1,EIF2AK2,EIF3A,ENGASE,EPAS1,FAU,FBXO44,FCGR1A,FCHO2,FDPS,FGFR2,FKBP1A,GAK,GAS6,HCK,HDAC6,HECTD1,HERPUD1,HIPK1,HIPK3,HSF4,HTATSF1,IFIT1,IFITM1,IFITM2,IFITM3,IRF9,ISG15,JUN,KATNB1,LGALS9,LONP1,LY6E,MAFK,MAP2K2,MAP2K3,…	153
Infectious Diseases	Replication of RNA virus	0.00155	Decreased	-7.293	ABLIM3,AGO1,AKAP13,AKT1,AP2M1,APBB1IP,ATP6V0C,ATP6V0D1,BAX,BCL3,CANT1,CCL4,CD38,CDC42BPA,CDC42BPB,CLSTN3,CLUH,CRAMP1,CTBP1,CYP1A1,CYP2U1,DAPK2,DDX58,DROSHA,DTX2,DTX3,DUSP3,EEF1A1,EIF2AK2,EIF3A,ENGASE,EPAS1,FAU,FBXO44,FCGR1A,FCHO2,FDPS,FGFR2,GAK,HCK,HDAC6,HECTD1,HERPUD1,HIPK1,HIPK3,HSF4,IFIT1,IFITM1,IFITM2,IFITM3,IRF9,ISG15,JUN,KATNB1,LGALS9,LONP1,LY6E,MAP2K2,MAP2K3,MAP2K5,MAP3K12,MAP3K7CL,MAPK1,M…	140
Infectious Diseases,Organismal Injury and Abnormalities	Infection of embryonic cell lines	9.82e-05	Decreased	-8.074	AEBP2,AHCTF1,AKAP13,AMDHD2,ANAPC2,APAF1,ARID5A,ATP6V0C,BMP1,BTG2,CANT1,CCAR1,CCDC51,CEP68,CHAF1A,CHST1,CNST,COASY,COL5A1,CPSF6,CTBP1,CTDP1,CYBB,DAZAP2,DDX23,DNAJB2,DNM2,EIF2AK2,EIF2B5,ENC1,EPAS1,ERCC5,FOXJ2,FPGS,HID1,HNRNPDL,HNRNPH1,IFITM1,IFITM2,IFITM3,LINC00239,MAP4,MAT2A,MRE11,NECAB3,NLRP1,NLRX1,NUDT3,PDZD8,PER3,PFKL,POLR1E,PPP1R12C,PRKCA,PRPF6,PSMA7,PSMC3,PSMC5,PSMD6,PTPRU,PVT1,PYCR3,RBM10,RB…	94
Infectious Diseases	Infection of epithelial cell lines	0.000111	Decreased	-8.074	AEBP2,AHCTF1,AKAP13,AMDHD2,ANAPC2,APAF1,ARID5A,ATP6V0C,BMP1,BTG2,CANT1,CCAR1,CCDC51,CEP68,CHAF1A,CHST1,CNST,COASY,COL5A1,CPSF6,CTBP1,CTDP1,CYBB,DAZAP2,DDX23,DNAJB2,DNM2,EIF2AK2,EIF2B5,ENC1,EPAS1,ERCC5,FOXJ2,FPGS,HID1,HNRNPDL,HNRNPH1,IFITM1,IFITM2,IFITM3,LINC00239,MAP4,MAT2A,MRE11,NECAB3,NLRP1,NLRX1,NUDT3,PDZD8,PER3,PFKL,POLR1E,PPP1R12C,PRKCA,PRPF6,PSMA7,PSMC3,PSMC5,PSMD6,PTPRU,PVT1,PYCR3,RBM10,RB…	94
Infectious Diseases	Infection of kidney cell lines	0.000136	Decreased	-8.129	AEBP2,AHCTF1,AKAP13,AMDHD2,ANAPC2,APAF1,ARID5A,ATP6V0C,BMP1,BTG2,CANT1,CCAR1,CCDC51,CEP68,CHAF1A,CHST1,CNST,COASY,COL5A1,CPSF6,CTBP1,CTDP1,CYBB,DAZAP2,DDX23,DNAJB2,DNM2,EIF2AK2,EIF2B5,ENC1,EPAS1,ERCC5,FOXJ2,FPGS,HID1,HNRNPDL,HNRNPH1,IFITM1,IFITM2,IFITM3,LINC00239,MAP4,MAT2A,MRE11,NECAB3,NLRP1,NLRX1,NUDT3,PDZD8,PER3,PFKL,PML,POLR1E,PPP1R12C,PRKCA,PRPF6,PSMA7,PSMC3,PSMC5,PSMD6,PTPRU,PVT1,PYCR3,RBM1…	95
Cell Death and Survival	Cell viability of tumor cell lines	0.0043	Decreased	-8.753	ABCG2,ACTN4,ACVRL1,AGA,AHR,AIFM1,AKAP13,AKAP8L,AKT1,AKT2,AKT3,ANAPC1,ANAPC4,ARRB1,ATG4B,ATP13A2,ATP7B,ATRX,AURKAIP1,BAG3,BAX,BCL2A1,BCR,BMX,BTG2,BUD23,C8orf44-SGK3/SGK3,CAB39L,CARD10,CASP9,CBR1,CC2D1A,CCAR1,CCL11,CCL18,CCNB1,CCND1,CD38,CDC42BPA,CDK11B,CDK20,CDK6,CDKN1A,CHCHD6,CHEK2,CHFR,CKS1B,CLCN7,CLK3,CLN3,COL1A1,COPS3,CTBP1,CTTN,CUL9,DAB2IP,DDX43,DHCR24,DHX38,DNM2,DOCK1,DOK2,DPH1,DPH2,DPH5,DUS…	311
Cell Death and Survival	Cell survival	0.00934	Decreased	-9.364	ABCG2,ACTN4,ACVRL1,AGA,AHR,AIFM1,AKAP13,AKAP8L,AKT1,AKT2,AKT3,ALKBH8,ANAPC1,ANAPC4,APAF1,APC,APOBEC3A,ARAP3,ARRB1,ATF4,ATG4B,ATP13A2,ATP7B,ATRX,AURKAIP1,BAG3,BAX,BCL2A1,BCR,BMX,BTG2,BUD23,C8orf44-SGK3/SGK3,CAB39L,CALB2,CARD10,CASP6,CASP9,CBR1,CC2D1A,CCAR1,CCL11,CCL18,CCNB1,CCND1,CCR1,CD38,CD74,CD8A,CDC42BPA,CDC7,CDK11B,CDK20,CDK6,CDKN1A,CHCHD6,CHD4,CHEK2,CHFR,CHI3L1,CKS1B,CLCN7,CLK3,CLN3,COL18A1,…	370
Infectious Diseases	Infection by HIV-1	0.0104	Decreased	-11.186	ABTB1,ADGRE5,ADRA2A,ADRA2B,AEBP2,AGBL5,AHCTF1,AKAP13,AKT1,ALKBH8,AMDHD2,ANAPC2,ANKRD6,AP2M1,ARHGAP32,ARHGEF19,ARID5A,ARPC1A,ATG16L2,ATOX1,ATP6V0A1,ATP6V0C,BAG6,BCR,BICD2,BMP1,BTG2,CACNA1A,CACNA2D2,CANT1,CARD16,CCAR1,CCDC51,CCL11,CCL4,CD74,CEP68,CHAF1A,CHST1,CLN3,CMKLR1,CNST,COASY,COG4,COL5A1,CPSF6,CRTC3,CSPP1,CTDP1,CYBB,DAPK2,DAZAP2,DDO,DDOST,DDX23,DDX55,DDX60L,DLST,DNM2,DTX4,DVL1,EDNRA,EIF2B5,EI…	193
Infectious Diseases	Infection of cells	0.00547	Decreased	-11.597	ABTB1,ADGRE5,AEBP2,AGBL5,AHCTF1,AKAP13,AKT1,ALKBH8,AMDHD2,ANAPC2,ANKRD6,AP2M1,APAF1,ARHGAP32,ARHGEF19,ARID5A,ARPC1A,ARPC1B,ARRB1,ATG16L2,ATOX1,ATP6V0A1,ATP6V0C,ATP6V0D1,BAG6,BCL2L2,BCR,BICD2,BMP1,BTG2,C1QBP,C1S,CAMK1,CANT1,CARD16,CBLB,CCAR1,CCDC51,CCL4,CCR1,CD74,CEP68,CHAF1A,CHST1,CLN3,CMKLR1,CNST,COASY,COG1,COG4,COL5A1,CPSF6,CROCC,CRTC3,CSPP1,CTBP1,CTDP1,CYBB,DAPK2,DAZAP2,DCAF13,DDO,DDOST,DDX23,…	239
Infectious Diseases	Viral Infection	0.000248	Decreased	-12.59	ABLIM3,ABTB1,ADGRE5,ADORA2A,ADRA1D,ADRA2A,ADRA2B,AEBP2,AGBL5,AGO1,AHCTF1,AKAP13,AKT1,AKT2,ALKBH8,ALPL,AMDHD2,ANAPC2,ANKRD6,ANXA6,AP2M1,APAF1,APBB1IP,APLN,APLNR,ARHGAP32,ARHGEF19,ARID5A,ARPC1A,ARPC1B,ARRB1,ARRDC1,ARRDC2,ATAD3B,ATG16L2,ATOX1,ATP6V0A1,ATP6V0C,ATP6V0D1,BAG6,BAX,BCL2L2,BCL3,BCR,BICD2,BMP1,BPI,BTG2,C1S,C3AR1,C4A/C4B,CACNA1A,CACNA2D2,CAMK1,CANT1,CARD16,CBLB,CCAR1,CCDC51,CCL11,CCL4,CD38,…	486
